# Supplementary material for: iEnhancer-EL: identifying enhancers and their strength with ensemble learning approach
Source: Oxford University Press journal article supplement (doi:10.1093/bioinformatics/bty458), 2018-06-06
Supplement: bioinformatics_34_22_3835_s4.pdf [file bioinformatics_34_22_3835_s4.pdf]

**Supplementary Information S1.** The benchmark dataset  $\mathcal{S}$  taken from Liu et al. (Bioinformatics, 2016, 32, 362-369). It contains 742 strong enhancers, 742 weak enhancers, and 1,484 non-enhancers. None of the sequences included has <sup>3</sup> 80% pairwise sequence identity with any other in a same subset. See Eq.1 for further explanation.

---

(1) 742 strong enhancers in  $\mathcal{S}_{\text{strong}}^+$

```
>chrX_48897056_48897256
CACAAATGTAGAAGCAGAGACACAGGAACCAGGCTTGGTGATGGCTCTCAGGGGTCACAGTCTGAT
GGGGGACACACTGGAGGTCAGTCTGGTGGGGGAGTTTTAGCCTTTGGTCCTTATGGTGAAGCCTA
GATTTGAGCCTGTTACATATTAAGTGGAGATGCTATTGTTTCAGCTCTGCAAGGGGGGGTTTGTCT
CTATT
>chr12_6444339_6444539
GCCCTCACATTCCCTGGCCCATCCCCTCCACCTCAAAATTTACAAACACCCGGGGTTGGCAAGGA
CAAATGGGGAGGAGAGTAAAAGGGAAAGGTTGGGGATCCTGCATGGGTAGACGGGGACAAAGTT
GAGACGGGGGCAGGAGTGGGCAAAGGTGTGCAGGACATAGGCAAATAGAGCTGGCCAAGGCTAGC
GACCC
>chr12_6444939_6445139
GAGCAGGAGGCCAGTCACCCCTGAGTCAGCCACGGGGAGACGCTGCAGCTGTAAGCTGTGCAGGCC
CGGAAGTTCAAGCCTCAGCCGAAACAGGGGAAGCCACACACAGAAACACAACAGCAGCCCCCGC
AGGTGGAGGCGTGTGCCCTGCTCAGAGGACAACAACCTTCCCCTGCCCGCACCAGCCAACACCG
TGcca
>chr12_6445139_6445339
cctctgctgagaacaggactggggcttccagggcaacaggaagggtttggggtggtgatgggaag
aacttcccagtcctgaaagTGTGGTTCCTTTCCCCGAAGAAGCCACTGGAGCACCTAAGGTCACT
GGTACTTTGAATCCCATCCAGGGGGCTTGAGGCAGAGTCATGATGAAGAACTGGGGGACGCCAGC
CCCAG
>chr12_6445339_6445539
ACAGCCTTAAAGGGAGCTTTTCAGGGACCTCTGGCCAGTGGGGGATGAGCCTCCCTGGAGGGAGG
GAGGGAGAGAGGCTTTCTCAGGCCACGTGTTCCCTTCTCTTTCCAGCACTCTGGGGTTAAGTCA
GATCCGGGAAAGGGAAATCTTTTCCAGCAACTCCGCCCCAGTGACTIONCAGGCCAGAGGGAGGGAG
ACCTA
>chr12_6641339_6641539
TGCAGTGCCTAGGCTCCAGATcagtgcttctgaaccgggggcaatthttgtctgccagaggacatc
tgacaacacctggggcctgthttgttgcatagcctataggggaagaatgctaccagcatttggtg
ggaagaggccaggatgtggctcaacatcctgcagtgacaggatggccccctcaacaagaatca
cacgg
>chr12_6645339_6645539
GTGGCATAGTGGGGTGGTGAATACCATGTACAAAGCTTGTGCCAGACTGTGGGTGGCAGTGCCC
CACATGGCCGCTTCTCCTGGAAGGGCTTCGTATGACTGGGGGTGTTGGGCAGCCCTGGAGCCTTC
AGTTGCAGCCATGCCTTAAGCCAGGCCAGCCTGGCAGGGAAGCTCAAGGGAGATAAAATTC AAC
TCTTG
>chr12_7052339_7052539
```

cctgtcgtcccagcgaacttgggaggttgaggcaggagaatcgcttgaacccgggaggtggaggtt  
atggtgagccaagatccccccagctgcactccagcttggcgacagagcaagactccgtctcaa  
aacaacaaacaaaGCCGGTTATGAAGCGGGGGTGGGGTGGGCTAGTTTTAATAGGTCCAGGCGAT  
TAGTA

>chr12\_46780933\_46781133

TAAAAATTTTCCCATTTTCATTTATACtccagtttcagttccgttgattcaaagttttgggactta  
ggacaagtttgctagcttctctgagcctcagtttttaaacggttaaataggaataacagcatgc  
tgagtgccaaagaattaaagaaaaatztatgtgaaaatatagattagaaagaaaactaatataaat  
gcagg

>chr12\_53772933\_53773133

ACTCTGCATATTGGTCAGCTCAGTATTAACCTTATTCGGTGAGTGCTGTCACCAGATCTCGTCCCG  
CCTGCATTTCCAGGGCTTGCAGCGACATTGAGGCATCTGCCCGCCTGTCCGACCACCCGGGAGGG  
GGGTAAGATTTGAGAGGTACTTTATAGGGCAGTTAAATGAAGACGCAAACAAGTCTTAGTGTTG  
ATGCG

>chr12\_109085071\_109085271

GGCGAAGATATTCAACTTGGCAGGAGCAGATGATTTGCTACATGTGGTTATAAGGTGGCTTCTGG  
GCAAAACCGTGACTCCAGAAATGTGTTTCATGACACCTTGAGTTTATTTTCAGAGTAATGTGTGTTT  
AGATACCTTTCTTTACCGGAGATACAGCAGCTTTCCAGACTGGGGTTACCATGTTTACACACTG  
AGGGC

>chr12\_109085871\_109086071

TGGCTGGCAGCTCGTGACATAATTTGGAAGTCATTGTTCTGCACCTGGTGCCCTCCCCCTGCATC  
CTCCACCCCTCCCAGTCTGTCCCCAGCTTTTTCACGGCCCATACACTTGGCAGTTGAAGGTGCT  
CCAGGCATCAGACAATCTATTTTCAGGAGGCAGTGAATGGGCATCCCACGACATGTCAGGACACTG  
GCTGG

>chr12\_122884047\_122884247

AAGAAAATCACATCTCTACACATCAGACCCTTTCCAGTCCATTTTGCCCCATCCACAAAATGAAA  
ATGCCACTTTATTTACTAAATCTAAAAATTCTGTTGGGAGGCAAAGGAGAGTTGAAGAATTTGCA  
ATGAATTTAACCTGCCAGGAGAGGGAGTTTAACACCAAGCTTCCAGAAACAGGCTGCGTGGTAGC  
TACAA

>chr12\_122884847\_122885047

AAACAAAAAAGTCAACTATCCAATGTCACGAAAAGTAACCAAAAAAAAAAAAAATTATGGGCCTG  
CTTAGCCCCAATTTAAAAACATCACATCTCCTGGCTGAACTGAGCTTAAGGTCCCTTGACGGGCT  
TCATTTCCCACGTACTGGCTGTTTCTAGAGCCAGGCCCATACGCTACTGCCACGCGCAGCATA  
TGCCA

>chr11\_6627824\_6628024

aTGCTGCCAGAAGGAAAAGGGGTGGAATTAATGAAACTGGAAGGTTGTGGTGCTGGTTTGAGGAG  
TAAAGTATGGGGGCCAAAGTTGGCTATATGCTGGATATGAAGAGGGGGTTAATTCCTTGACGGGCT  
TTCTTGAGATAGAAGTCCAGGCCCTGAGGTGGCAGGCAGCCTGATAGTGAACAGAACCCTTGTC  
CCATA

>chr11\_9587224\_9587424

ggcattttttaacctgtgtttcattttcatctgtgaaatgtgaataaaaaataactctcttacaga  
gttcccgtaaagattaaataagtatgtaaagcatctgggtcagtgccatcatatagttggcacc  
aaaatattCTCCCCTCTCCAGCTCCTGCAAAGGCACCCAGCTCTTTGCAGCACTTAGGGCCTT  
TCTCA

>chr11\_46576424\_46576624

ATCAATTCTCAATCACCAAAAAGCTTATCCAAGTAGAAGCAAAAAGACATGGCTAGGATATGTACAT  
AAGACAAATGCCGGTCAGGCATGGTgggaggccaaggtgggaaggttgcttgagtccaggaggtc  
aagactacagtgagccatgattgcaccgctgcactcttcagcccaggtaatagagtgagaccctg  
tctta

>chr11\_47428824\_47429024

TTGTATGGGCCCCGGTGGGGTGAGATGGACAGAAAGCTTCAGAAGACAAGCTGGGCCACCAGGGAG  
AAGTTGGCGGTCTAAGGAAGGCCAACAGTGCAACATGAAGTGGGACAGGCACCAGAGGCAGCCCT  
GAGAGCTGAGTGTGCTCTCAAGAGCCCCAGCAGAGGGGAAAAGTGACAGAGTAAATGGTTGGAGCT  
GCCAT

>chr11\_61738824\_61739024

GCCAAGGAGCACAGGAGGAAATGAAGGTTTCGGGGAAAGCCCTTGGGGAAGGCCTGCTTGGTTTT  
GGACTAGATGTGCTGAGTTTTCCAGGCTTCCGGGATGTCCAGGGGGACAAAGCCAGCATGAAGCTC  
TCGGACCCACTGGAGGGAAGTCGGTCTGCTGCAGGGAGTAGGTTTCCTGAATCAGTGTGGCTCC  
ATGCT

>chr11\_62320824\_62321024

CTCCCCCTCCCCAGTGGGGAGCAGGGAGGGAGGGGCTGAGGAAGCGGGGAACACCACCTCCTCACC  
CCTTTCTTGAATCTGCTTTTCTCCTGTCTTTTCCAACCTTCCTCTGCCTTTCCCCCAGCTTCCTG  
GGGAAAGAGAGACCAGCCTGGGTTTCCCTCTCTCCTCTGCTTACAGTTCCTTAAGTCCAGTTGAA  
GGAGA

>chr11\_62321224\_62321424

CGGGTGCAGGAAGCCTTTAGATGCCTCGCTCTCCCTGCCCTCCACACTTGGTATGCTGTGTCCA  
CCACCCTTATCCCTCAGCATTTGAGGGCAGCATCCTCCTGCTCAGCTTTGGAGCAGAAGTGACTC  
AGTGAGTACTGCAAGGATTGTGGAAAAGCTCGGATGCacccttgataagtcacttcaactctct  
gggct

>chr11\_62647224\_62647424

CCCAACTGGCACTGTTTAGGAACAAGGAGTTCCTGAGAGTGTGGCACCCACGGTGTGATGTC  
CGGTAGTTCCCTGCTGTGAACCCTGTCTCTGCCCCACTTCAATCCAAGGACCCTGTGGAGGGAAT  
TCTAGGCTTCTTCAAAGCCTCTGCAGTACCAGCTGCCTCCAAGGCCTAACATAGTGAAGTGATAG  
GGAGA

>chr11\_65187024\_65187224

GAAACCACAGAGCTGACCTGGCTTCAGAACAAGATGTGGGGCTCCAGGCACCCGGGAGACCAGTG  
ACCCTGATTGGCAATAGCCGCAAGAAAGGGCTTGGAGACAGGggccaggegcgggtggctaccct  
gtaatcgcagcactttgggaggtcaaggcaggtggatcacttgaggtcaggagttggagaccagc  
ctggc

>chr11\_118783790\_118783990

CTCTGGGACCCTCGATGTGGGACTTCCAGGCTTAGGGGGCCTTCCCATGGCCCTGGTTCCCTAGT  
AGCTCTCCACACTTCCCCGACTCTGTGCCAAAGGAGACCATGCAAATCAGCCATTTTTGCTTGG  
GAGGTTTTCCCTGGGAGTTTCCAGCCCCACCCACCTGCAGCCCTAGGGTAATGTCAGACAACCC  
CAGCT

>chr11\_118783990\_118784190

CCACAGGACCAGGGAAACTCCTGGTCCCAGACCTTTCTAGTCTGGGATTGTTGAACAGGGTACTG  
GGGGGTGATCGGCGTTTTGCCCATCTGGCCCACTGTCCCTTCTGGAGCCTGCACAGACAAGTG  
GCATTGCTTGGACAGGCCTGAGGTCACCTCACTTCTCTTGGCTCCTACAGTCATTGTCAGTGTGG

CCGGG

>chr10\_74014594\_74014794

TTTGCATAGGGGCATTACCACTGGACTTGGGCTCAGAGCAAGTGTATGAGATAAATGAGGTGC  
CGTCTCAGAATCACAGAGCACTCCTCTACCTTTGACCTTCTGCAGGCTTTCCTACTGGCTTCTAAGA  
GCCAAGAACCTTCTCCGCCCCACCCAGCTCTCTCTCCCCTGCAATCTCTCCATGAACAGCATTG  
TTTTA

>chr10\_82219420\_82219620

CCAGCTGTTGGGCCTGTGCTCCTGTACACTGCACGGCCTTGAGAGGAGTTCGGAGCCCTAACATC  
CAGGAGAGAGGCCCCACAGCAGTGAAGGAAATGGGCCTCTCCCGAATCTCTTGTGTACCCCG  
AGGTCTGAGTGGTGATCCTGGGGATGCTATGGGACTCTCAGCAGTAGGAGTGTGTCTGTCCCCAG  
TCTGG

>chr10\_103911010\_103911210

gggaccacaggtgcatgccactacacctggctaatttttaaaaatTTTTTgtagagataggggggt  
ttcactgtgttgcaggctggcctcttaactcctgggctcaaggatcctcccacctaggcctt  
ccaagtgttgagataacagttgtgagccactatgcctggccAATTTTATATAGGAGAGGGGGT  
GTGTT

>chr10\_105667810\_105668010

cgggagggcgggggttcagtgagccaagatcacaccactgcactccagcgtgggcccacagagcga  
gactccatctcaaaaaaaaaaaaaaaaaTTAGCACATGAACATTTGTCCTAGAGAATGCGAGGTCA  
TTCTGGTCTTGACTGTAGCCTTCCAATATTCTAGGTCTAAGCTCGAGTTGCTACCAAGTGTCTG  
TGAC

>chr17\_7478276\_7478476

TGATCTGGTTCCCATTTGTGTAACCTGTGTTGATTGGGAAGGTAGTTTGTGAGCCATGAAATGCTTG  
GTTCAATTGGTTGCTTATTGACCTCATTAACCTAGGACTTGAATATCCCAAAGGGTATGCTCTTTA  
CCACATTCAACTCCTAATTTATTTGTTTAGGTTATGATGTGATTGCTCAAGCCCAATCTGGGACT  
GGGAA

>chr17\_7482676\_7482876

AACTGCCAAGCAAGTTTCGCTGAGTTTGACACATGGATCCCTGTGGATCAACTGCCCTAGGACTC  
CGTTTGCACCCATGTGACACTGTTGACTTTGCCCTGATGAAGCAGGGCCAACAGTCCCCTAACTT  
AATTACAAAATAATGACTAAGAGAGAGGTGGCTAGAGCTGAGGCCCTGAGTCAGGCTGTGGG  
TGGGA

>chr17\_38269674\_38269874

GTGGGCGGAACGCGCTGAAAGTTTTGGCGGGGCTAGCAGAGGGAGAAAAATACCCAAATTTGAGT  
TGTGATTTTTAATAGGGGGAAAAAAGGCAAGGAGGGTGTGTCTACCCTCTGAGAGGCCCC  
CGCAGAGGGGAGCAGGAGAGCAGCACACTAGCATCCTGCTCGCGGAAGCCTGGAACGCAGGACAT  
GGTTT

>chr17\_38270074\_38270274

ACCCAGATGAATCCTCTTTCCCTGGGGAGTGGCCAAAACAAGTCTCCTCTTTTTTCTACCTACTT  
CTGCCCCACTGTTAGCTGGAaaacgtagctttatacagtcataaagctgcaaggaccttaaaga  
tgatattttccatTTTTTTTTTggtctgggaaaaccaagccagtcagtgaagctcttgcT  
GCATC

>chr17\_42173274\_42173474

CTGCTGGGTTCCAAGACCTTGGGTCCAGTCCCCACATGGACAATGGGCCGAGTGGCTCAGGGAGT  
GCACGAAGTTCCAATGGGCTTATGGGAGGGCTAGGTCTCCACTTCTTTGTACCTACACACAGTTC

TCAGGTCACTGCATGTCACTCCTCACCCTGCCCTGTGGTTGCCAGGACAACCTGGGCAAACACCA  
CACCA

>chr17\_57923018\_57923218

AGGGATCCTATCCCTTCCCAACAAGGCCAAGAGTTCACCTGAGGTAATGCATTTGCCTTGGGGGC  
GAGGCCTTGAATTGCAGCAAATAACCTGTGTGTATTTGCATATTTAACCAGTACTCTTAAGAAGG  
ATTATACAAAACCTGTTCCAGACAGCTGCTTACTCATTGCCTTTAAAATTGCGTGGTGCTGGGA  
TTGGC

>chr16\_2301999\_2302199

CCCGGCTCCTGCCCTTTGGGAACAGGATCAGAGCTGCAGGTTTAGTCACCGAAATGGGGGTGG  
GGGCAGCAGAACCAGCGGTAAGAACAGGCCACCCGCCTTGCTCAGCACAAGGGCAAGTGCACAA  
AGGCCGGACCGCAGTGGCACCTTTTTATTTGCAGAGAAATGCCGAAAGATAAGAATACAGTCTGT  
TCCCG

>chr16\_9141899\_9142099

ATTTTCAGACTTCAAACCTCATCCCAGCAATGTtagaggaagctgatgagggaaagctccctgcagc  
gtgggctgtgccccaggagcccctgagtttaaattcagtctctgctacttactaatcacaggat  
gttgcaaatcgctgagcctgcatcccccatctgtcaaatgggggtgctaaggcctacctggca  
agatt

>chr16\_9142099\_9142299

CCTTCATCTGATCAgtgccaggcgctggggagatgatagtaaagacacagacaaaattcctgcc  
cccacaaagcttacattctggcgaggaaagacaataatgaacaaatctatatgtacaacgtaagg  
ccagctggtggggagcatggtgaagaaaaattaaacgggtgaggtgtagaagtaagaggaggtaa  
gagga

>chr16\_21514099\_21514299

GGGAAGGAGTACCCACGACCACCAAACCCTGTCTCTGCAATGTGAAATGTGCTTTGAAGTCCT  
CTCACCCCTGAGGCTTGCCCGCCTTCTGCTGGTGAAAGAAGCTGGGggctaggcgcggtgggtcac  
gcctgtaatcccagcactttgggaggccgaggtgggpcgatcatctgaggtgaggagttccagac  
cagcc

>chr16\_53132499\_53132699

GCTTTTTTCTTTGTCTCTTGTAACCAACATCAGCAATGAGCAGGCCACCTCAAGTGTGACTCAA  
TCAACGCGAGGCAGGAGGCATGCAAAACAAAACAGAAAACCTCCTGGCAGCCTTAATATAGCGATT  
TTTCTAGCAATCTACATGACTATCCAGGCCAATGCACCCCATTACATATGCAAAACATCTGACG  
TTTGT

>chr16\_67275699\_67275899

GGTTGGGTATGCACTGGCCAACACAGGCTGAAGCAGCACAGACCCAGAAAGGTCAGGCCACCAC  
GCTGTCCCTGCCTCCTTGCACTGCTGTAATCCCAAGAGAGCAGAGAATGTCCCTCTCCTTCCAGGAC  
ACCTGCATCCATTTGGGGAAGGGTCTGAAGGTTAAATAGTCCACcttctttttttttttgatat  
ggagt

>chr16\_87421899\_87422099

GAAGACATTCTGAAGACTGCAGTCTATTCAAGTGTCAACCCCTAAATCCTCCTGACCAAATCCTTT  
CTGAGAATAGCTCCCTGCACTCCTCTTGAAGCAATACTTGTGTTTACTTGTCTCAAGAGCAA  
GCGATGACACCACGATGGATAGGACACTGGGCCTATAGTGGTGCAGACGACAAAGCCGGTGGCCT  
CTCTC

>chr16\_87812299\_87812499

ccacaggcgtgtaccactacgcccggctaattttgtaaatattttgtacagagatggggctctcatt

atgctgctcaggctggtgacaaactcctgggctcaagcgacccacccacctcggcccccaagt  
ggtgggatcacagacgtgagccagcgtccccTGTACGCGTTTCATTCCTCTTCATATCACATCA  
CTTGG

>chr16\_87887299\_87887499

CCTAGCCGGCTTCTGGAGAGCTTTCTGGATTTCGCAAGAGGCCGGCTGATTGCATCACTCGCTCAT  
TCATGCCCGGAGGGAGGCGGGGAGTGGGTGTGGCCAAGCCGCACTCGAGGCTGCCTCTCCCCAAA  
AGGGAGAGAGGCACGCTGCCACCACTGAACTCCAGACACCAGACAGGCGCTGCGGAGACACTGAG  
CACTG

>chr15\_58624108\_58624308

AGCATCTCCCTCCTAATTCCCTGTGATGTGATAATTCTAAGACCCACTTCCTGGAGCAAGAAGAA  
GCTAAGATCCCTCAGCCTGGCTGATGTGGTTTTGAAAGTGAAGAGGGCAGGAAGTGTGTGGTC  
ACTCCCACCCAGCTGTGGCCTCTTCCCAGAGCCCTCCTCACCAGATGCTGCAAACCTCAGACTGC  
AAATC

>chr15\_89181596\_89181796

GACCCAAGGAAGTGTGGCCGGGCTGGTGGGGCCTCCCCGAAGGCCTGCTTCTCCTTCACCCTCAC  
AGAGTCAGCCCCACTGGAGGCAGAGCTCATTGAGGCATCTGGAACCCACGGAGGCTGTAAGGGC  
TCCCTCGCTGCTCCTTGCCTTCCCTGGGTTGGAAGTGGGGCTAGCCACTCCCACCACAAGTTTC  
TCCTG

>chr15\_90943596\_90943796

ctttgtcctattgtagtttatatttttaattaattccttttccgtctccattcttgtaaatagct  
taaatgatctcttttttagttcATGAAGAAGAGTGTGGCACAAAAGATCCTTTCAAGGTGAAAAAA  
AGGAGCAGGTAGCCAAGATAGTTGGGTTACATAGTTTACCCTTCCCTTTATAATCCGTAGGTGT  
TGAAA

>chr14\_61569847\_61570047

TCTGTGGGTAATATTGCACTTTGTAAACACTTGGTACTCAATAAATTCCAGCACACATATGGAAG  
CAATGGTGCCAACTAGCTGGATTGAAAGTACTCGATACCAGTGTCCAGAGCATTGGCTAATGGA  
GAGGAAGAGGTTCCCTCCACTTCTGACTATGGGTGTGCGGCACAAGCCCCTGGCGGGCCTCACAC  
ACCCT

>chr14\_61570047\_61570247

ACTTAGCACCTGTCAATCTCCTGTCTGTGAAAGAGCCTGCATTTCTCCCTGTTGGGCCCGCC  
ACTTCTCAGGATTTTTTTCAGTGTCTGTCTGCAAGTCTTTCTTCTGCTGGAAGTGTGGGAATGG  
GAAGTCAGCTCTAGCCATGGCTACAAATAATTCACCTTTCCAGCAGCCTGCGGGTTTTCTTCTTA  
CCGGT

>chr14\_61570247\_61570447

ACAACAGTGAGTCTCATTCTCAGAATCTCTGAGGCCTGGCCAGTGAGGCCCTATTCTTCTTCCC  
CTGGCAGAGGCCAGCTCTGATGGTGTCCCCACCCAAAGGGCAGACACCCATGTGATTTTCAGTGGT  
TCGGAGGAATAGGAACGGAATGGAAGGGTGAAGTCTTTTCTGCTGAAGCTCAAAGCACTGTGGAT  
ACAGG

>chr14\_74208847\_74209047

AACTAGAAGTGCGTGTCTGCAGAAGCAAGACAGAGAAAAGGAAGAATGTGCGCCAGCCTGGCAAGC  
CCACGTGCCCTCAGGGGGCTGCGAGCCCCTCCAGTGGGCGCTCACACACACTCACGCCCTCCCTTC  
ATCACAGCCCTGTCTCCTTGTGAGCCACAGCACGGGCTTGAGGCCTGGAGCAAGGGAAGGTCCAC  
GTGGC

>chr14\_77422047\_77422247

caaacaaaaccgagaaagtctctgcctcaagctttttattgaaggagggaaatagacaaaagaga  
agcaaacaaaacaaaaaggtaaaatcagaggggtggtaaaagctatgaaggaaataaagcagtata  
actgcttaaggagcagggacctctgcaggtggatggcaaggggaaggtctctctgcagagacgaca  
ttGAC

>chr19\_4374400\_4374600

CAGGGCCAGAAGGACCTCTCCTGTGCTGACAGCAAAGTCACCAGCGGGAGTCCAGCCCACACTGC  
CTTTCTGATGAGGCCTCCAGCTCTGGCTGCTGACTTTAAACCCTAAGGAACCCTGTGCAGGGCCT  
GCATCCCGGAAGGCCTCCACCAGCCCGAACCTGGCCCGTCCGCCCTAGATGGGGCAATCGGCCTT  
TCTCC

>chr19\_4375000\_4375200

CCTGGGGCTCCCATCACCCTACCAGTCTGCCAGGAGGCAGCAGAGCACTGAGCCCGACCTGCT  
CCCCCTCGGGCACCTACGAGACCCACCTGCCCTCCATGCGTGGGGGAGAAGGGGTGCCCTCTGCT  
GTGGAAAAGCTGGGACCTACTGTCTGTGGTGCAGGCTGACCCACAGAGCTCCAGGACAACCCCG  
AGAGG

>chr19\_4375200\_4375400

AGTGGACAGAGCCAGCCGGGCCCTCCAGCCCCACCTGGCCAGCTGCCGCTctctgggcagatgt  
ctccacttgataaacaggacagctaagggcctaggagagacatgcctggcccaaggccagacagc  
aggagtggcTAGGAAGGTCAAGGGATCCCCACTGCAGGCCCCACCAACCCTGGCTCTGCCTGGAA  
TGACG

>chr19\_6738600\_6738800

TTGCCAACTGCAATCAGACATTTTCTAGCTCAGAAGCCACCAGCAGGTGGGGCCAGGTCTCAGC  
AGAGACATCAGTCCAGTGTGGGCTCCCAAGGCTCTCCTCCTGGGCTCAGCTGTATCTCTCTGTT  
CTGGGAGCCTGGGTGCTCTGTGTAAGGGGAACGTATAACCAAGGGCCCCCTGCAAGACGCCACG  
CCTTG

>chr19\_13275200\_13275400

TCCAGATGGGGACTGCAGGGAGGGCTGACCCCTCCCGCATAACCAGGCGGGCAAGGTGGAGCG  
CCCCTCCTCGGAAATTGCCCCCGCCCAAGATGCGTCAGTGACAGCTGTGCCTCCTCAGCCCGCA  
CCCAGCCGTTTCTTTTCTGTGCACACTCTCCCGATGGGCTGGCCTTCAGCCTGGAGAGACTC  
CACGG

>chr19\_13275400\_13275600

CCCCTTGAAGGGGCTCCCCAGAGGGTCTTCTGACGAGGGGGAGGGGACAGGCTGAAGAACAA  
TGGGGCTTCTGTGGCTGCAGGACGCCAGGCACTTCTGTTAACCCTTTCTCGGGGTGCAGCTGC  
AGGGAGCACCTCCCAGGTCCCGCCTTGTGGGAAGGGGCAGAGGCAGCCTGAGGGGAAATCTTGTT  
GCGGG

>chr19\_14629600\_14629800

CTACCCAGTCCTTTCCCCGGGAGGCGATGAACCTGCTCGCCCTTGTCTCGTGGGGCCTGCGGTGG  
GCTCCCGCCCGGTGACGCCGGACGAACCTAACCTGTGTCTGCCTAACCCAGGGGCCCTTC  
TATCTACAACATGGCAATAAGAGAACCTATCAgggccgggcgcgagcctcatgcctgtaatccca  
tact

>chr19\_18393600\_18393800

GCATGCACCCCTCCAGCTCCCCACCTCTGTCTGAATGGAGCCCACACcctcctttccctgacctc  
cttcccctcactctctctgatccttggcctcccagttgcaggactaatcgtaacctctgggccttt  
gcacgtgctatgctctctgcttggtaactcccttccccCAGTGCAAAGATGTGTCTTCAGGAAGTG  
CCCCA

>chr19\_39173960\_39174160

CCCCTGCCTCTCCTCTTTCTCGCCCCCGCCCTCCTCCAGAGAAAGCAGGTGGTGAGGGCTCTCT  
AACCCAGACAGGACTTGCTGTTTCAGCCCCAGCTTGAAATTGATTTCCCTCCAGCCCTCCTTGAGCC  
AGGCCCGTGAACAGAGGAGGGGTCTGAGCCAGGCCTCCTAGGCCATTGGTGGGAGGGAGAATGA  
GACAG

>chr19\_39174360\_39174560

TGAAATCTGTCATCATGCCCATATAAGGCAAACCTCCTTGATTACTTTTTACCTTGGCAGAATCA  
CAGGAATGTCAAGGTAACCAGGCCACCTCAGCATAGCTCTGATTCTCACCCGGTCACCTGACTTG  
CCCGCCCTCCCCATGACTCACCCAGTGGCTCAGCATGGGGCCTGCTGCACTGTGGCTGCTGGAA  
TCTGC

>chr19\_39174760\_39174960

tccccagcattcagagccttatctgtaaaattagagcagcagaacaaaccctggtacacacta  
agtgtcaataaatgtgagtcattTGTGTAATTATAGTAGGGTAGGCCTTATGCCCCACCCAGTC  
ATAAAAATGCCTCTTGCTGTTGTTGGTTCAGGCTCAGCCCTTAGTGGCTTTCATGGGGCAGGTT  
GACAT

>chr19\_39175960\_39176160

TTTAGGTAACCTTTAACACCACGAATTAGTTGCCTGCTGGCAAACCTCAAACCTCCAAGCCTGAAA  
TTTCTGGTTGGAGTCACCTCCCAGATGGACTCAGGGATTCATTCACCCCTCATCCAGTGCTCAC  
GGAGCCTCTGTGAGGTGCAGGCCTGGAGAGGAGCCCTGTGGCCTCAGCAAAGGGCAGGCAGGCTG  
GTGAG

>chr19\_39177160\_39177360

AGCCTCTGCTGCTGCCCTAATTTTAAAACCTGCCTTTTGGGAGTGTAAGTTTCCTCTGTAAAGGT  
AGTTATTTCAAGGTAGGCCTCACCATCTCCTCCTGGTGAGAAGCTCTGCCTGGAGGGCTGAG  
CACTGCCTCCCGCTCTGTGGGCCACCTGCCTTGGGTTGAGACCTATCTCTTCCCTGGACTCTGT  
GTGGG

>chr19\_39893160\_39893360

CACACATACTGTTACACAACCGGTACACATGACGGCTAGCCCAGGCCCGCCGCCACGCAGTC  
GCAGGCCAGGGTACACACGGCCAGCGCCGCTTGGCCACGCCCGCTCAGGCCAGGCAATCGCG  
CCAGGCGCACACACGGCGGAGCACACGTGCCGCGGGTACACGATCCCCAGCTCGCCCGGCACT  
CGGCC

>chr19\_39924960\_39925160

Ccttccccagttctgaccactttggatcagcttctggtattgggccagtccttctcccaacta  
ggctggcaggtccatgaaggcaagaccttaagtcactctggatcactgctatgtccccaaaactca  
acagagggtagacatacaaatccttcaaATACAGTGACAGCCAATAACAGTAACATTCAACATCT  
GCTAC

>chr18\_3596800\_3597000

AGCAAAGCCATTCGCTGTGATCTCTGATTGTGCAGTGTGCATGTCCCTGTCACCAGAGCCCCCTCGT  
GTTTGATGTTGGCCAATGCCGCCAGCATGATCTAGCAGGCCAAATCCTAATCTACCATTCTCTGA  
CACCAGCTGGTCCCCTGGGTGCTCCACCCGATGTCCCCATTCTCCCCTTGGCCTCCCCACA  
GGCTC

>chr18\_3602800\_3603000

AGGTCAAAGACGTTATTAAGTATCGACTCTGAAAAAGCAACTATAAATACTGCAAATCGACTAAG  
CCAGAGGACGCAAATATATCCTGCGTGTGTGTGCTGGACTGTGGTTGAGACTTCATGGTTCGTGC  
TCTGGGCTCATGGGGCAGCTGACTGCTCATAATTAAGATTGCTGTTGCCGCTGCCTGTGTTCCA



AAGAG

>chr18\_3606200\_3606400

TCATTCTGAGCCTTGGTGCCTTGACGAGTCACCACGCTCAGGAAGAAAGCTGCAACTCGCCAGG  
ATGAAACTGGGCCCCGCTTCTTAGAACCTTCCCCGCTTCTTCCCCTGCCAGAACCACACTAAA  
GAATTCGCTGCTCTCAAAGACAGACGTTTTTATTACTTCCCTTACATTATAGAGTTTGGGCTTAGA  
TAACC

>chr18\_20839802\_20840002

GCAGCTTCAGCCCCTTGTAAGCCCTGCCCCCTCTCAGGACTGCCCTGAGGCCTCTCCAGTCCTCC  
CCACACTCAGAGATCTGTGGGGAAGCTCCGCCCAGCCACACTCCTTGGGATAATACTAGCCGGTT  
CTGCCTGATTCTTTTTCCCCCGGAGCCAGCCTAGGGGGCCCCGGGACTCCTCTAGTGAGCCTTGAC  
TGTTA

>chr18\_20840202\_20840402

TGCAAAATGGGTTTTGTTTTCTTGGCATTGTTGTTCCGATCACAGATTTCCCTGCCAGGGTGT  
CTGTGGTTATCAGCTGCAGGCTCAGCTTGGGGCGGCCGCTTACACAAGCCACTCTGTACCACGT  
GCCCTACCTTAGTGACGGGAGTAAGGAGCTTCTTCCCCTCCATGTCATTCTTCTGTTCCCTT  
CATTC

>chr22\_30592400\_30592600

AGGTATCCTGTCACTGGGTGCTGAGCTGCCGGCACGCCTCCTATCACCATTGCCATGGCCAGCGT  
CATCACCATCGCGGTGGCCAGCGTCAGCGTTTGACAAAGGAAGTACTCAGTTACAATTACCTTCC  
TGTTGGCCAGCAGCTCAGATAAATTGCTTTGCAATGTGTGTGAGAACCTCATAAAATTAAACCAAGA  
AACAG

>chr22\_30592600\_30592800

AGGGGCCAGGTCTGGGCTGAAGGGAAGTGTCAAGTGGAGGAGGCAGTGATGCAAGGCTACCTTTG  
AAGTCACTTTGTTTGTGAAAAGTCTGCTGTGCTCTCTTAAGGAACTCCACTGGAATGAGGTTTC  
TGTGCATGTGGGGTTTAGGGCTATTGTTTTTGGCTCTGACTTTCACCTCAAGCCCTAGCTAGGAC  
ATGTA

>chr22\_35772600\_35772800

agagtgttaggattacagcgtagaccaccacaattggccCAGTCTATGGATTTTTAAAAAATAA  
CTTGGGCTTGTCTTCTTGTGAAGAAGGCTGTTTTCCAGCCTGTCACACAGCAGTTAGGCTGTA  
GACCTCACTGGAGCCCCTGCCCTGCAGAATCGAGCACATGTTCTTTCTGGGTCTGTGTGGGGTG  
TGGGT

>chr22\_35773000\_35773200

CTGCCCAAACCACTTCTGTTTCTGAAGGCGCCTTGGGAAATGCTGAGTCGCGATTTCTCATCCC  
CTCGTGCAGCTGCATTTCTGCTGCGTCATGTTTGGGAGGGGGGACTCGCGAAACAAAGGGAAGG  
CGGATTTTGTAGATTTTGTGAGTCACCAGTGCCCTCCTCAGCTTCTCTTTAGGTGGGAGGTGAA  
AGGGC

>chr22\_36726454\_36726654

TTGGTCTGTTATCTTGTGTGGCCTCCAATAACCTTACAAGGTATTGTATTGTAATGTACAAAGCA  
GGTATTATCATCATTGTTTTGCCATCTTCCACACAGCGGTTCTTCTGGATTTGTTCTGATCTC  
AGAGGCATCTCTTCTGGGCAGTGGGGTGGTTAGAATTCTTAGCAACCAGTGGGCTCTTTGGCCTA  
CTCAG

>chr22\_36727054\_36727254

CTTCCCAAATTCCTGAGCAAGGGACAGTGGGTGGTGGAGACAGGGTTCCTCAGAGCACAGTTTGA  
CAACCACTAGTCCATGTGTCTGGAGCAGTTCTGCAAAGGAGGAAGCCACAGCCGAGAGCGCTGTG

GCCCTGGGTTCCGCTCTTCCCCACGCAATGCCTGGCCCCTTGACCTCTCTGGGAATGAAGGGACT  
GCTCT

>chr22\_36727254\_36727454

GAGGATGGAAGGAAATGGTGTTCCTGTCGTACACGGTGTGAGGCAGATGCCCAGACATGCCGTCC  
TCACCCGCCTGCTGTCTCGGAGCTCCCAACTGAGCAATTCCCTGGCACCGCCACGAGAAAGTCTT  
TCATAAAAGTTACAAATTCAGGAACCAGGCCATTTTCTCCCTGGATTTTCATTTTCAACCGAAAAT  
GTCCT

>chr22\_36727454\_36727654

GAGGCCAAGCCCATGCAGTGAGGGCATCTGAGCTGATGTGGCCATCTACCTGTGGACAGGTGTTT  
CCAGCCAGCTCAGCAGGCTGGGCCAGGAGGGAGGAAGGGGAACCTGACCGCAGGTATTTTCATCC  
CAGGTGCAGACTTCTGCTGGGGCTTAAGCCTCACTTCTCTGTGAGAGGAGCTGCAGCTCACTC  
TTGTC

>chr20\_10492200\_10492400

cagtaacagcAAGCACAAATGACTAATTTAAGAAAAGCAGTACagcagctggacgtgttccatct  
tctttgatgctcaccacctccctgtgaggaaagtactcttactaccccagcttcgcagatgacac  
ttggaaaacgtaaggacccacagttaggtGGCCAGACTGAGAGCAGAGTGCTGAGTCACCACACG  
GTGCT

>chr20\_30160339\_30160539

GGCACCGTCAGTCTGACAGCAGGGCTGGCTCCTGCAGTGTGAATGAAGCGGTCTTGTGCTCGACT  
GTGAAGGGGGGTTAGGACCTGCTTCCCAGGGCGGGTCCAGCTTTCTGAGGGAAAGCCTTCAGAGC  
CTCCATCAGGCCGGCACCAGGTACCAGTTAAGCACTGGGCAGGGAACAGAAGTGGTCAAACGCCG  
CTTGC

>chr20\_30160539\_30160739

CGCGACTTGAAACTGCTGAATAAATGGATAATGTCAAGCGCTATGGCTTAGGGCAGTAGTACCTC  
CGGTTCCCTACGATCGTGTCTGGGGTCCCTGAGGAGCAAGGCAAGAGTCGGCCATTCAGGAGGTCA  
GAGTTCAGCTGTTCTTGCACAAGCAGGGAAGCTGAGTCACCCCAAACACGGGCAAGACTAGCGGT  
GGTAT

>chr20\_45946593\_45946793

taacctctctgtgcctcagagagtttaccactttacaagtgttaccttgtaaagttatcgaagaa  
gtcaatgagttaattcacgtaaagctcttagtataataacctggcaaatagtaagcacctattcaa  
tggtaaactAATGGGTAAGTGTATTTTTTTTAAACCAATCActcttctcctttttcttcttctt  
ccacc

>chr20\_45977593\_45977793

TGAGGTGCTAGAACTTTCCAAACATTCAGGCTGACACTGAAGTGGTAAGAAGCTGGGCATTTACT  
CCAGAAGCAATTCATCAGACTGTCGTTCCACAGGAAGAAAATGGGTGCATCACCAATTGATATGG  
CTGGAATTTTCCATTTGGAAGACTCAACGCCAGGACAGGAAGGAGGCTGGGGAAGAGAGAATGTC  
CTGTC

>chr20\_45977793\_45977993

CTGGGGAAGAGAGAATGTTCCGTGGTCTGGGACTGTGACAACGCAAAGGCCCAAAAAGACAGCC  
TCATGTCTCGAACCTAGTATAAGGAGAAGATTTTAGGAGAGTTCCACGTTAGGAGGAGAGGACT  
TAGGATGGGAGCTAGATAGAATGGAAAAGATTATAGTTTCAGAGTTAAATTATAGGGCTTGGAGA  
CGAAG

>chr20\_45978793\_45978993

TAATCAATGCTGGAGCAGAAGAGAGAGGGGAAAAAAAAGTTAAGCTGTTTTATCTTTCCAAGTATT

ACAAGTGGGCACCATAATCACCCAACCTTTAGCAATAGCACCACCAGCTTTAGCACAGCATTTC  
GCACAACAATTTAAGAAAACCATCTTTTTCACAGATCAGCAAACCATCCTTTCAAAAGGAACCCG  
TGCAC

>chr20\_45988593\_45988793

ACTGCATAATCTGTGTTTTCTTTTAGGAGGTAGACCAGtttttttgcttttttgatata  
gtgtctcgctctgtcgcccaggcttgagtgcagtgccatcatcacaactcaatgctgcaacctGA  
AGACCCACCCTTTTGGAGGTGGGTTTTCAGTattgaatgatggcgctgaaggaaacttttagatta  
gactc

>chr21\_35320130\_35320330

GCCTCCCCCAACCTATTGTAAAATGTCAAGTGTTCAGTTTTGAGAAAAAAGAAAGCTGAAGA  
AACCATGACTCATGACATGGGCTGACAAACAACGATCTGAAGGTATGCTGGTGGTGCACACTGTG  
GAGCTCTGCCTTTGTGTTGTGGTGGGGCCGGGGCTGGAAGGAGTGTGCATGGGACCAGCCAGTAA  
AATTC

>chr21\_35320330\_35320530

CACTACTCTCCGAAGCCGATTGGGAGGCAATTTAAAAACCTGGGCTTTTTCCAGCCCAGTGTA  
GTGGATGACTCTGGGTCCCCTCAGGTATGTGCATCTGTATGGGAAATCAGGAAGAATGATTATTA  
ATAACTGGAAAAAAAACCTGTTAGTATCTTTCCATGCCCAATGCCATGCTGAACCAGCCCTGC  
CTGCT

>chr7\_44679475\_44679675

AGCAGCTCAGCAGTACCGGTATGAACCAGTTTTTTTTCTGACTGCCTCCAGCATGAGCTGAATTC  
CGTCTGTGCAGTTATCCTCAGCCAATTGAAAATCACCTGGAGTTGTATTCCAAGCACAAAAGAAG  
GTCAGAGAGTGGAGGCCGATGATCATGATCGCCCTGTCTCCAGGGCCTAGGCTGGAAGGAGTCC  
TGCAG

>chr7\_44679675\_44679875

CCTTTGTGGCTCAGGACCAGAGAGCTGACCTTGACCCTGACCTTGTGATCCCAGGCATCAGTGGC  
TGGAAATTCCTTTCATTTTATTGTTGAGCCCAGAAGCGCCAGCTCTCTTTGGCAAGGTTAAGCT  
AGGGTAAGAGGCACTGTTACTAGAGTGACCAGAGTTCTTTAAGCGTCGCTCTGCTATTACTCAGT  
TAACC

>chr7\_104585764\_104585964

TTCCCCAGGGACTGGGCTAGCTCAATCGGGAAAAGTCAGCATCCAAAAGTCCTCAATGACGCAG  
AGGAAGCCAGGAGAAAACAGTCAATGGCTAGTCATCACTGATTCGTGGTGCACAGGCgttagaaca  
ggaaggatctgcacagatcagcctctcccaccctcactttcctgataaaggaactaaagtccgg  
aaagt

>chr6\_7146401\_7146601

AATAAACACTTTGTGGAGCCTGTTGTGTGAGAAGCAGGCAGCGGCTGTGGGCTCAGCCTTGCC  
ATCTGTTTCTAGAGCAGTCTGTGGCCCGCTTACCATGCCCTCTGTCATGTAACATAGGCCCAT  
CAGCAGCAGCATTCTTGAATGTGCATTTATGTCTCTGTGGACCGGGGTAGATGGCCTGAGAGG  
GGGAA

>chr6\_26025821\_26026021

GGAGTCCAAGAAGTGGCCAGAGTACACCAGAGTATGTAGTGGAGTACAGcttttctcattcttta  
gtagggtgtgtagagaaataactctatTTTTATGGATGTATAGATcactctagtcctttctgatga  
aaactttacagttgccactcatttactattacaacaatgctgcaCTACATTATGTTTCAGTTTT  
tagcc

>chr6\_26026221\_26026421

CAAAGATGCTGAATATTTGGCTGACTTCTAAAAATCTGGTCACCTAACTTTGACACTTCCTAGGT  
CGTACAGTTTGAACCTTTCACAATTAAATCAGTTTTGGAATTTACAATTTAAGGCAGGAATAGAA  
GACTATTGGGTTGACAGGTACAGTGAAGATGCAAGTCATCTGAGAATCTTACATCAGAGGGGGCT  
TCCAT

>chr6\_26122621\_26122821

TGTTCTAGACTTGAATAAAAAGATAGGTAGACTACGTCTAACCCCTCATCTTAAAAATCTTTACCT  
GGAAAAGACCATGAGTAAAATACTTAAGGGAATGTGGAATTTCCAGGCCACAAAGCGGCCTGCA  
GTTGTCTAGGAAGGGAGAGTCTCTAGGAGATACAGTGTATGTGCTAAGTTTAATGACGTCTCCT  
CTTCA

>chr6\_31706021\_31706221

GATTCATGCCTCTGTGTGGGTGTGAATTCCTCATGGTGACCCTCAAATCTGCACACAGGACC  
CCTTCCATTGAGGGGAGGGGATCAAACAACCTCTACTTCTCAGGGTCTCTCCTGTTCCAACCTG  
GTCTGTGTCCAAGAGAAGCCTTAGGTAAATGGGGCCAGCTTGAAGATCAAACAGGTTTGGCAGCC  
TCTCC

>chr6\_35437822\_35438022

CGGGGTCTTAGAGAGGGTGTCTGCTTGGAGGTCACCTACATGATTGATTCAAGTGCGTTTCTGGCC  
TGCCACATTTGAGGTGTGCCTTGGTGACCAGGTTCTAAGCAATGCCAATGGCTTCTCTCTCTAT  
CAGCCAAGAAGTATGATGCGTTTTTGGCCTCAGAGTCTCTGATCAAGCAGATTCCACGAATCCTC  
GGCC

>chr5\_79542844\_79543044

CAGAACACTAAGAAAACACTGGGTCTTTACAATTAGGCAGGTATGGCCACTTAAAGTACTAAAA  
TAGCTTGGTCAAAGAATTACATCCAATGGCTAGTTCTGTAGACATATCAGCTTATATGAAGACTT  
CCTTTTTAACATCAAGTTATCACAGATGATCTGGCCACATACTGCTCTGAAATAAAAAGTAGACAA  
TGCCA

>chr5\_133838901\_133839101

taggctttagatTTTTTTGGTgctaaaaccagtacagtcccaggcaaaccaggacagaacagttgg  
tcaccctaGGTAGTAATCATTAACCCAGAGAGGGCCAGGCTTCAGGAGCCAGCTGGCCAGGGTTC  
AGGTGTGGCCCCCAGGGCCCCCTCCAGGCATTGCCTTGTCTTGTGGTTTTGTGGTAGGGCCTTGT  
CCCAT

>chr5\_179246594\_179246794

GCTTGGCCAGCACCTGTCTGTAGGCCACAGCCTCTGCCAGCACGCCCTCTGTGTCCCCTGCCCC  
TGTCTGCAAGGCAGTGGCTCCAGCAGGCCCTGGGGCATTTCCTACTCTCCACCGCCGGATGCAGG  
GAGAGGCCTGAACCCTCTCCACAGGGCTGCTCTGGGCAGGGTGAAGCCTTGCCCACTTCGGAGC  
CCTCC

>chr5\_179246994\_179247194

CTTGCCCTGGGAGGCTCCAGAGGGTGACCACTCGTCCTGCCCTCTCCTTGCCCCAGTTCTGGCGG  
ACAGGTTACTCTGGTGGCATAAAGCAGTGTTCCTTCTCCTAGCTGAGGAGGCTGTTGGCTGAC  
CCCCTTGGCTGCCACAAGGCCAACGGGCCTGAGCCCCACAGGGCCATGGGCATTACCTGCTGA  
ATTGA

>chr5\_179247194\_179247394

GGAGCCCATAAGGAGTCACTTGGACCACAGTGAACACTTGGCGACCACTGACACTCAGGAGACCT  
TAGCTGGTCCCTCCAGCACCTCTCAACTCCACTCCTACTAACTGGGAACCTTCTCTGGTGCTCAGG  
CCAGAGTCGGGGTCCGTACCGAGTATGCTATGCGCTGCCCATCACCGAGGATGCCATGCGCTGT  
AAGAG

>chr5\_179247394\_179247594

GGCTGCCACCGCGGCAGGCTGACCATGGCAGGGTCGGAACAGCAACCTGAGAGCCAGCTTGTTCCT  
GGCCAGCAGTGCCCACTGGGCGACCTAGCAGCCTCCTGATATGGGGGCTGTGTCCCCCTCTCCCT  
GCACTGGGTACCCCCAACTGAGGATATTGCTGAGTCATGGCCAGGCCCAAGCCTGGGAGGGGCGA  
GGGC

>chr3\_39192396\_39192596

TACTCCTCTGGAGAGGCGGGGAAGTGCCCTGGTTCTCATGTTCTCTGTTCCACCTCGGAATC  
CAGAGGCTAAGAGGCAGAGGCAGGAGATGAAACAAAAAGACTGAGCCAGAGACAAGGAGAGGCCA  
AGAGGGAATGAAACATAGTGAGAATCTAAGAAAAGTGTGACACAGTGAGTCAGAGGTGGGGGGAG  
GGCC

>chr3\_39192796\_39192996

CAGGCAGCCCTCCTGCCACCACACACAGGCACTGACAACCCCCACTCAACTGGCCACAGTTATC  
CACACGCTCAGGTCACACTGTGCAAATCCAGGAAAGGCCACCTCACCCCTGGGCACCAAGTAACC  
AAAGGCTGTTTTTGGAGAAGTGGGGGCGGGCTTGAAAACGTCACAGCAACTCCTCTGTCCACCTC  
AGCAG

>chr3\_39192996\_39193196

TCCTACCAGTGCCCCAGGCCTCAACCAAGCCAGTCTTAGGGAGGGGGCACCTTTAGCTGCCTCC  
ATCCCCCTTCAGGAATCTGAAGAATGTGTCTTTAACCTCAGAGCCCCAGGCCTTGGCCAGTCCC  
CCAAAAACACTTGGGGTCACATGACCCCTGTCCCTCAGGAACTTCCTGGGAGAAGGGGAGGGCAC  
CTCCC

>chr3\_39193796\_39193996

gggcacggcaagccacagaaggcttaagtagggagtgacaatgccagatttgcattttaaaaACG  
TGGCTCAGCACCGGGAGTGGAGGGGGTGTGACCGGTTGGAGGTGCTGCCAGGGCCAGGAGAGATG  
ACAGGTCAAGGGCATAGGAGAAAGGCAGATACCAAGATGTGGAGAAGGAAGAGGGCAGGGCTGTC  
AAGGA

>chr3\_49066196\_49066396

GTCTGCAGTGAAGTCGATGTACCCAGGGAGAATGAGAAAGTCACTGCGAGGGAAGGGAGTGAATT  
GGGAGTAAAGCTCTCAGCTTAGGGCAGCATGAGACTCCATCCCCATGTACCAATCAACCCGTAAC  
GCATGTGAGCAGAGAGTGGCACTGACAGAGTCTGTGTGTACAGGCACAGCACAAGGTGGAAATG  
GGTAC

>chr3\_52028760\_52028960

CACGCACTCAGACAAGGCCACTCCTTACCCTAAGTGCCACTGCCAAGCAAGGGAGATAGCCAAAC  
TGCCCTCAGGAGGCAGGTTACACCCTGACCAGAGGGTTACACTTCAGGCTGTGGAGACCAAGGAA  
AGCTTTATTATGGGTCTGGTAGGGTAGAAAAGGAATTGCAGGCTTTGGGTGGGCCAGTTAGGCT  
GTGCT

>chr3\_53303760\_53303960

ctaattttttagtatttttagtatagacgggtttttgtcatggtggccaggctgatcctgaactcct  
gacctcaggtgatccgcctgtctGCATCAATATTTTAAATAAAGATGTTAATGCTCCACAGGTTG  
TGCGTCTTTCCCCACGTGAGTCCACATTCTTTTCTACCCCTAGGATTACTACTGGCACAGAGGAAG  
TTGAA

>chr3\_141086710\_141086910

TAATTACCAAGCCTCATGCCAGGCACTGAGATATAAATATCCCCTTTAAAGAGTGGTCATGTCTT  
AAATCCAGGAAGAGCTAGTTCATGTTGGCACCCAGGGTAGGGAGCGAAGCCCAGGGCCACAGCAC  
AGAGGCAGAGGAGAATAGACACTGACCACCAGGAGCTGCCCGGGGATGGTGACAAAAGTGCCTTC

CACCT  
>chr3\_177077106\_177077306  
GCGCCAGTGGCCCCAGGCTGCGACAGCCAAGTCGGTGGGCGCGCATGGCGGGGCTTGAAGGAAA  
GGTCCAGAGCCGGTGGGAAAGGCCACGCCCCGGGGTAGAGCGCTTCCTTCCAGATCCCGGCCTTT  
AACTGCAATTCGGTTTTAAGGGCAACCCTGCCCGGTTACACCTAGCCTTGAAGATGACAGATTG  
CACTG  
>chr3\_177077306\_177077506  
TGAGCAATTTGCAGGGTGAGAACGGGAGCCTACGACTCCGCACCTGCACTGCCAGAGCCATAAAT  
GCAGCAAATCATGGCCTATAAAATGTCACCACTGCTGAAAGTGAATTTTCCAGGGGTCTTCTGCA  
GAGGGAATCCACCACGGAGAGCGACCCTCGGCTCTGCAGCCTAAGAGGAAGGCCCTGCAGGGT  
GGGGG  
>chr2\_43446296\_43446496  
GCCCTcacacacatccacacatacttacacacagacacacccatgtataccaacacacacgcccc  
tgcgtacacaccaacccccacatcacaacagacacacccacacccaggcacacccccaaagatcca  
catacctacatagcaacagatacacccaaaccacaccagcactcacacacatccacacacactt  
acaca  
>chr2\_70370696\_70370896  
TGCCCCAGCAGTTGGAGCAGTTTGGTGAGAGAGTGGCACAAAGCTGACACTGGTACATGGCCCTG  
GCCACTAGTTGTTAAGTTCCACCCATCTCCAGCACTGCCCTCCCCATGAGTGACAGTGAAAGGTG  
GGAGGGACGTTACAGGACTGTATCAGGCATTAGACCTGCTACTCCAAGTGCAGTCTGGTGCAGTC  
TGCA  
>chr2\_87785885\_87786085  
CTAAAAGAGCTTAgttaggcatggtggctcacgcctgtaatcccagcactttggaaggtcgaagtg  
ggatgattgcttgagcccagaagtttgagaccggcctgggcaacatagtgagacctcatctccac  
acacacacatgcgcgctacacacacacgagcgcgcatgtgtgtgcacacacacacaaattagccag  
gtgtg  
>chr2\_101620168\_101620368  
CTGCCCTGCACACTTCAGGCCCTGCTCTTTAAGCATAGATGAAGTCAATAGCATTGAATGATCTG  
TTCCAAAACATGTCCTGTCTTAAGACATGACATTTAATCAAATTTAGTATTTTGATTGAGGACT  
TCAGAAAGTGGATTATGCATCTTCTTGTCCTAAGTGTATGCTAATTGCTGGGCATTGCACACTG  
GTGGG  
>chr2\_178029954\_178030154  
ACTCCTTCCTCCTAACCAGCTTCAGCTTTCTTCTTCCGACCACAGACTCTCCAAGATTTTGCTTT  
TCTCATCCTATCCTTCCCTCTTCTTGTACAAGCGAACACTGTCCTTCCAGACTCTTCCATGGCTG  
CAGAAAGCTGTAGGGAGGAGCCCTCGGCCAGCCAGACAAAATGCACGTAATATTGCTCACTTTAGG  
AAAAG  
>chr2\_202022955\_202023155  
cctgcaccacacagcTGTCTGCTCACAGTCATGTGACAGGGGCTTCCCCAGCCAGAACCTCCAGG  
GAGCACAAATAAAGGAAAGAGCTGGAAGGCACAGTACAGCATTGTTCTGTCCAAGCCTTACATA  
TCAGCATGGGCAGGGAGAATGTGGTGAAGTTTTCTTTCAAGGACTTTGTTTGATAAGGAAGGACA  
TTTAT  
>chr1\_8933213\_8933413  
GGCTTGGAGTctacagacttttggatgataacgtggtcacgcatggtgaccactctagtggg  
atgctgacaatgggggggctgcgcatgtgcagagggcagtggtactcatgggtttatgtacctct

gcaccttccgctgcttctgctgtgaacctaaaactgctctaaaaaGTTGATGAGACAGGGAGA  
GAGAG

>chr1\_23882213\_23882413

gaaggcaagaacatgagctttgaagctagaggaagctggggttcctaaactctgctctgctactt  
tcttgctgtgtgaactgtttcttgctgtgtgccactttcttgctgggtgatcaagttattcagcc  
tgagtcttttttctataaaccaaggaatgttaccatcacggtggtttgtgaggattagaacaaa  
aatgg

>chr1\_23883213\_23883413

agaacaggttaagaaccactgATCAGGCTGGGAGTTTGGTTGGCAATGCCAGAGGTTCTCCTCCT  
CCCCATGCCCTGTTACCCCCAGCAAGCTCACCAGGGTTAAGGCACTAAAGGTGATGACGTGAC  
CTGTTTGTATGAAATATTGAAGTAATTCATGCCAGGGACCAACACACAGATGAGATCATACCAT  
AAACA

>chr1\_27113613\_27113813

ATCCTGAGAAACAAGAAATCCACCAACGGAGAAGGATTTATCATCTGTTTCCTTTAAGGAGGGTG  
CAAAGTTGTTCTAACAGTTTCCGTTACAAGGGTACAAACTGGCCGCTCCCCCAATAGACGGTTT  
TGTTGAGTTCGCCTCTTTTTTTTTTCTTCTTTTTTTGGCCCCACTTCCTATGAGAGAACTGCTTG  
GGTGA

>chr1\_36838813\_36839013

GGTGTACCAGGTCTTTGCTGGGTGAAGGGTGGGTGCTCCCTGCTCCGTGCTGAGGCCGCTTCCC  
TGTGGCAAGTCTCTGCAGGTATGTCTTTTTTTCATtcatcatttgatgggcacccaccgcttgcca  
gaaaccattcccagtgtttcccagattctctctttaaactcgcaccactttctgatgtggattctc  
ccctt

>chr1\_36839213\_36839413

GGAGGCGGATAGAGAGGAGGATTAGTAATCCCTCGATTTACAGCCAGGACTCCCTGACGACAAAGA  
TTCATGCATGTGCTGTCTACTGCTCCAAAACAGAGCGATGATTTTGTTCATTTTTTAAAC  
GCAGGACATGTATAGCTCCAATTTGTCAAGAATACATAATATCACATCATTTAATGCATAATATC  
ACATC

>chr1\_36839813\_36840013

CCTCCTCACCCCACTGCCCCGAGGAAGTCCCCACTGGGCTTTTCTGTGACCTCCTTTGGAGGCTG  
CAAAGAAAGCCTAGAAGCTAAAGGCCCTGGCCAAGGGGGTGCATCCCAGAGAAATTTCTGGAAGA  
AAAGTCTCAGGGCTGTGCACACAGAGGTAGAGAGAAGCTTCTCTGCAGGCTCTCTGGGGAAAA  
AATAC

>chr1\_36840613\_36840813

GAGAAAGCAGCAAGCAACCGCAGAACAACCTGGTTGATTCTAAAAGCCACCATTCTGTCCActgtg  
tgacctggacacatgcttctctgctctgcagcttctcatctggaggacagggacagcgctactc  
ccaaaaagggttcccttcaggattGCCAGGGCCCAGTACATAGGAGGCACTAGACGCTTAACTTA  
GAAAT

>chr1\_36853413\_36853613

ACTCTTGCTGGCTCTCCAACCTTAGGCTTACGGCAGACGGTGCTGCCATAACAAAGTGACGCCTG  
TCACAACAGCATGAGATGGTGGCTTGACAAGGTATAGGCAGATCTGCCTATCACAGAAGGAGGGA  
AAGAGACCTTCAACCCCCAGGGCTTCCTCAGGCTTCTGAACCCTCGTCTCCATTACTGGTTGGC  
TCTGG

>chr1\_37943213\_37943413

TGGGGAGGCTGGCCAGCCCTGCCTTCTGTCTGGGGCAGGAGCAGCCTAGCTGGAGTCTTCTAC

ACACACATCCTATCAGTGTCTGCTTAGCCCGGCTGGGGGACCCTGACCTTACAGGCAAAGAGAAC  
TGGAATGGGGGCAGGGATGTCTGGTTTTCTGTGCCAGCAGCGCTTCCTCCAGTGCAGTGAAAGA  
GACTA

>chr1\_45272213\_45272413

GACCTGCCGGTCGGGCCTCATCAATGCTGGGCAGGCAGCCTCGGGGCCGCACCGGTGAGGGTTTC  
CGCCCGGAGTCTTTGGCATTCTCCTCCTCCTGGCGTCCCAGGGGCAGAGGCCTGCTGGCCATGGA  
CCTGCTGGCTGGAGGAACCACACTCAGGGTGGCCTTACCAGGCATCTGTCTACCCACCCCAGCC  
TCTTG

>chr1\_45272813\_45273013

TCATCTTCCACCCAGATCTACTCTAGGGTGGCTGGCACAAAGATCTCCCCTACACCTGGCCCAGG  
CTGAGGGCAGATGACTCATGAAGCCCCCTTCCACCTTCTGCCTTTGGCCTCTGATCCCACCTCCT  
CCAGAATCAGTTCTGAGATGGCTGCCCTCTGCTCCCGAAACTCCCTCAGGCACCTGAGTCACCCG  
CAGGC

>chr1\_45273213\_45273413

GCCCCTGAGTCATCAGGGAGAGCGGCCGACAGGGTCTTGCAGCTTAGAGGGCAAACCTCCTAAGCG  
CAGGCAACAGAGGGGCAGATGTAGAGCAAGGCTGTGGTCAGAAAGGCTTTGTCTACCCCAGGAC  
TCTTGAGCCAGGGCCATTTTCTCCCCTTGTGGAATGGCCAGATGACTGGCCATTCGTGAACAAG  
TCACA

>chr1\_45274013\_45274213

CTAGGGCAGGCTCAGCTTCGGGGGCTAAGACCCTCGTATGGCGCTTAATGCCCTCCTAAGGGCTG  
AAGTTTTCCCTGGGCCTGCCCGGAGATGGGTGGAGTCTTCTCAGGCCAGCTCCAGTTTCCAT  
GGAAACCCACAGGCTTCCCACCCCGTCGGCTGCCTGGGCAGACTCCCAGCCAGGGCCTCTTTCGC  
CGCCG

>chr1\_45274813\_45275013

GCCCTTCCTTCTTTGGACTTTGGCCCTGGCAGAAGAAAATGATTCTCAGCCCTGGGATCCTTA  
GAGATGGTGGGTCATGATTCCCCTCCTCCCTCCACTCACTCAGCTTGGTATTGAGGCCTCACTGC  
TAGAAGAAGAGGAACAGATGACCTGTTCTGGGAACTGAGGCTTCAACAAGAACAAGCTCCAG  
AGATT

>chr1\_150539776\_150539976

AGATACAGCGACTTCCATCCTGTTTCATACCTGACCCCAACTACCCAGCTTTGAAGTGGGGCAAG  
GGGCAAGGAAGCAGGTAGCCAGCACTCCTCCCCGCCATCACCAGGCTCCTCTGCAGAGCTGTTG  
TTCTTAAAGCTGACAACAAGCCACCTCATTTCAAACACACACACAACCTCATTTTGACACA  
AAGTT

>chr1\_150540176\_150540376

TTCCCATAGCCCTTACCTGAGGTGTGTGCCCACTTTCCTTAGATTTGGGCTCTCATGCAAAAG  
GAAATAACAAGGTATCCTCCCCTCAGGAAAGTTCAGTAACAAAGCAGTGAAACCGAACAGCTGC  
TCCCTTGCAGCAGGCCAGCTGTCTCCCCTCCCCCATTTCCACCAAGGGCCGGAGACGGTGGGAA  
CTGCT

>chr1\_150540376\_150540576

CCAGGCAACCTAAAGGATGGCGTTGTGAGCTGAGAAAGGCAGGCCTGATAGATCTGGGCATAGGA  
GCTTCAGGAATAAATGCATGTGAATGCGGTGTTTCCAGGGAGAATTAACCGCATTCTCGCCTT  
CAAATCTGAATACCTGAGAGTCATAACCAGCCCAGTAGGGTAGACTATGAAATGTATAGCAAAAT  
TTTCA

>chr1\_150540576\_150540776



AAACCAGCTCCTCCTACCAGACAAGAAAATTAACATTTTTTTAGGGCACAGAACTGAAAGCATTTT  
TACTGAAATCTAATCCAGGATGAAACCTAACAGTTAAACATTCTTTTCCTTCTCTGCTTCTTTGG  
CTCTCTATCCCAGCACACCTTGTCCCAGGCTAACTTGAGTAAACATACACATGTGACCACATGAG  
GGCGG

>chr1\_156074376\_156074576

TCGTCCATCCTCCACTCCTGGATCCATTACCAAGGGGCCTGAGTGAGGTCCCACCCCCTAAGCC  
ACACAGGTCCTCTGCTTCTCCCCGCTACATCTCACTGGGACCCAGCCTGGCAACGGCTAGTGC  
GTCGTCGGTGCTCAGTTAGCCCCAACATCTCTTTTCTTCTCCAACAGGAAACACACCTTCCAC  
CTCTA

>chr1\_156093776\_156093976

ACCTGGCTTTGTCTTAGGGAAGGACAGCTGGGAGCCTAGTGGCTCTGGTAGGGGATCTGAGAGGC  
CTCAGACCCTAGGCATATTTGGCTGTTTGGCAGGTGTCACGCCCAAGGGAAGCGTGTGGAAGCAG  
AGCCATGCCTGCTGTGGGTGCACATGCCCGCGTGAGGGAGTCGGGGTGTTCATCCTGGGGCACC  
TGTGG

>chr1\_156096576\_156096776

CTCAAGAGGCCACTGGGATGCAGCCACTCCTGTGCTTGGGGAACCTGGAGGATGCAAGGGAAAGG  
ACTGGCACTCTGCTGGCACAGCACCCGGCCTGGGGCAGGACACGGGCGAAGCCAGGGTCTCCCCT  
GTGAGCACTAGAGGATTTCCCGACCCCTGCCCGGGTATTGTGTGCCTGAGCATGAGTCACCTGAG  
GGCC

>chr1\_156717976\_156718176

CTTCTCACTTGATGGAATTTCTAACCCCTTCAACCAAAAGAGGAGAAATCCCTTCTACAGTGACAC  
CTCTATCCCTCAAGCTACAAAGAAAATGTCCTTTCTTACATTTGGAAGTGGAGGGCAGTTCTTCC  
TAGATGTAGAGGTTATGAGGTCTCAGGGCAGCCCTGTACCCCAATACAGACATCTGTCTTCCAGG  
TGGTG

>chr1\_161089376\_161089576

TTGTCACGTGCTGCTGAACAGCAAAGGTGAGACTTTATAACCCTTTAGCCTGCCTCTTCCCATGC  
TCTTCTACCTAGATTCTCCAGAATTGTTTCTCAACTCTTATTTCCCTTGACCCAAGGATTTAGGGG  
TGGTCTACTTCAGTTCTAGCCTATAAACTATCTCCTCCTTGGGAGGAGTAAGCAAGGCTTCTA  
GAACA

>chr1\_234747377\_234747577

GATTGGTAGGTGGAGAGAAAAAAAATCATGCTGACGTTTCTCTCTAGTCGTTGCTATTGAAAA  
TACCAGGTTGCTTCAAAGGATTAACCACAAGGAAGAGGAAAAACACCCTTAGAGAAACAGTGGAG  
GGAGCTGCTTAAAACACATGAAAAACCTGTTTCGAAAATGGCACAGAAAACGTAATGTCAGACCT  
AAATG

>chr9\_131903379\_131903579

TTTTGGGAACCTGGGCCAGGGGAGGGAAATGAGGGGGATAAAAATGACAGGTTTTTTTTTACTTAA  
ATCTTAAAAGTTTTGTACAGTTGCCCTTACTAGAGAAGTAAGAGGCCTGCCAGGAGTGGGTAC  
CAGGTGGCAGCCCATGGCTCAAGAGTGGGGGCTCCTGAGGGCTCTTGTGGTGAACCTGATGCCCT  
TTTTG

>chr9\_136215979\_136216179

TTTTAGTGGGTGTAAAGTGGTGCAGTCCTTAATTTGTGTCTCTTAGAGACGGGGGCAATGATAC  
ATGCTTCTTGCTTTTCAATTGGGAGTTGCTGAGCGAGCATTAGCTCAATATGGTAGTGGCCTTGAA  
TTCAGCTTAGCCATCTGAAAACAAGTACAGTAGCAGTGTTCGACGAGGTAAGTACTAGGACTGCAATT  
CTGCT

>chr13\_99137399\_99137599

agacagagccgactcatcaagacaggggaactgcagttgagaaagagtaattcacgcagagccag  
ctgtgcaggagaccagagttttattattactgaaatcagtcctcctccgagcattcggggagaattt  
ttaaggataagctggtggggtaggggaagccagtgagccagaagtgctgattggtaagagatgaa  
atcac

>chr12\_6446539\_6446739

AGGAGGCTTTAAAGTGTGACTTCCTGTGCTGGGGCTGCAGAGTGGGGAGGCGACGCTGAGATCGG  
CCTTGTGGTCTGACCCCGATCCAGCCACCTTGCAGGGACCCAATTAGTCTTCCTTTCCCCCTCAT  
TCATGTGTCTGTTTCATTTAATGTCAAGGTGTTGGGGGAGGTCGTGGCAGCTTCTCCTCCAAGGGC  
CCAGT

>chr12\_6999739\_6999939

TGTATGctagcatggaaggaattgtttcttcggttgagtgccctaaagtgcttgatggcctttca  
gatggatcatgtcatacagaaaggaagtatcttaaaacactacaatcTAGTTTAAAGACATAAAAC  
AGTAGAATCGCTGTCAGCGTCACAAGATACAAACGAAGGGCTCAGAAGTGGGACCAAGAGAACAT  
AGTCT

>chr12\_45626733\_45626933

GAGAGGGAGCAGGTACATCTGTTCCCTGCACTCCATCTTTTCCTCTTGAGGAAGGGAGAGGCAGG  
GAGCTAGAAGCCAACGGGCCTCTGGATTCTCAGCCAGAAATGGCTCTCCAGACTTCTACTCTACT  
GGCTGTGGGATGTGACTCATTCCCTGTCTGGAGGAAGAGTTAACCTGACTTCGGCTGGGAGTCAC  
AACCA

>chr12\_45627933\_45628133

AAATGTGTTCTTAAGTTGGAAGAGAATGTGTGAGGAAAATTCACCTCCTATCTCATTTTACAGAAA  
TTCAGATTTTAATTGTCCTGCTGTAATTGTGAAACTGAACTGCACATTCATTCTGAGGATTATTG  
CACTGATGAGTTTACTGATGAGTGTGACACTGGTTCGGAGGGAAGTGTTCAGACTCTCCCTAT  
GTATA

>chr12\_45628333\_45628533

ATTTGTTCAAGCCCCTTTTCCAAGTCCCAGGGAAGTTACTGACACTGATGTTGGTTTCTTTTAA  
GAATGACTCATGATTTTTTCGAGCCTGGTTTCCACTCTTAGTCATCTTCCCTGCCTGAGTTAAAAC  
AGGCTTTAGGCTCTCACTGAATCCAGCCTTGACAGAACCCCCACCCCCACCCCTGGGCTTTTG  
ATTCC

>chr12\_45628733\_45628933

TCTGTGTTGCTCTTGTGTCAGTGTACTATCAGTCCAGCAGTAACCTTTCAGTTCTAATAATTTGG  
CTTGTCCTTTTCTCCTCAGTGTTCAAACTCCTATCTCAGAAACATGCCTAGGACCTCAGTCTC  
TTTAGTTCTTTGGATTCTGTGTTGCTCTTGTGTCAGTGTTCCTAATCACCTCTTGCCCTGAAAT  
AAAGT

>chr12\_45628933\_45629133

CCTCTCCAATGTGGTGCTACTTCTCCTCCTTCCCTGTAGCAGACTCTGGTTGTGGCCTGTCTGTGC  
CTACAGATTTAGTGACAGGAGCTGTACTTTTCTGTTCCCTTCTTTAGCTGTCATACTGGTGGTAT  
CTTAAATCTTAGCCCTAAATTTGTGATGAAACTGTTGTATTTTACAAGTCTTCCCTAGTCATATT  
GTGCT

>chr12\_45629333\_45629533

ACCTAGTTGAGTGGCATGACATCTGAGCAGAAGTGGTGGTATGCCGCCTTTT  
AACTCCAGCACCTGTGGCTCTTGAGCATTctcctcattcttcagtatggaaaatggatattttct  
cagtccttgcaaaaacagcttcaagaaaagtcccctagtcAAAAATTCAGTATTTGGAAGTGT

ACCAG

>chr12\_56520133\_56520333

TGGCACCTGGGCAGCAGAATTGTCAGTGGGCGGGGACCCACCCTGTTTACTTGTGTTGGTAACTG  
CATTGCAGCTGCTGATCCTGTGGCTCCTGGGCCCCAGCTGGGACAAGAACTTCTTGAGGATGAAG  
TTTTATCCCCTATATAATTTCTGATGATCTGGATGAGGTGAGGAAGGGAGAAGTTTGAAAAGAA  
CCTCC

>chr12\_76337933\_76338133

TGAATGGGGGACCTGCTAAGAGCAGAGAAAATCCCCCAGGGATCATTTTAGGCCACTGCTTATA  
AAAGAACAAAAATAAAATGGGAGGAACTCCAGAACCAAAGTCCTAGAGTCCCTATTTGCTTGTGA  
ATGAAAGAGACTAGTATGTAAATAAGAGCTTTCGATAAGCCAGACATTCTTTCAAGTCCAGTTTA  
TCTGC

>chr12\_76338133\_76338333

AGTATGAGTCACTTCCTTTTTAAAAGCAAGAACTAAAAGAGAAAGAGGCACATAGTCATTACCCA  
GCACAAACCTTCTTAACAGACCTTTTCTTCTTATTCAAATGCAAGAAGGTAAAAGACTCTTGCT  
CTAACAAAACAGCAACATCATTTTGCATATAGTGTATACACTGTTTGGCCAGTTAATACCCTCCT  
TCAGC

>chr12\_109083471\_109083671

CTCAAAGAACAGTTAAAAGATTTCCACATTGTTCAAACCCCTACCTAATATTCATCTAAGTTTTTC  
ATTTTAGGAAAAAATGAGTATCAAATCACTTTATGTGCCCAAATTTCAATCATAACTTATTTTT  
GGCTTTGGGTGATACATACTGAGAATTCCTCAACTCAGCAAGGAGAATGTTAAGTCACACATGTG  
CTCAG

>chr12\_109086271\_109086471

GATCACACAGAAAAGCACTGTCAGGAGACTGCCATTCCCTCTCAAGTAGCCCATGAAAGAAGGCA  
CTTATCAGCACGGCGCCTGGCACTTAAAGGAAGCCCTCAACAAATGTGAACTGCTGCGATTTTCAT  
CACTGTCACCTGTGTCTCACAAAGGCATGGTATAGACCAAGTACTTTCCAAACCTAAGACAATTCT  
CTGAG

>chr12\_120637017\_120637217

GAAGTTTATGGGAGACAATCACCTTTCAGCACCATTCTCCAGGAAGAGGGAGACGGGCACCTGGGG  
AGAAAGGACAAAAGTCCAGGGGAACTGACTTCTCCAGAGCTGGGTTGTTTTCCAGGTGCCCTCG  
GATGGCCTTGCGCATCATGGTGTCTTGCCCATCAGCACCACAGCCTTCCC CGAAGGGACATGC  
GGATC

>chr12\_125402647\_125402847

ttccccatttctccctcccaccagccctggcatccaccattctactttctgtctctatgaattt  
gacaactcatgtgacctcatataaTAAGCTTTGTTTAAAGGGTAAAATAAAATTTAATAGTTGAAA  
AAGCACTTTTTTCAAAGAGTATTTCTAGGAAGCTCCAATTCCTGACACCAACCTTTAACAATAAC  
AACTC

>chr11\_9385424\_9385624

aaaggaaaGAAAGAGAAAATACAAACAAAAGCTGAGATTTGCTGAGTTCCTACCATGTGCTACGC  
AATGCCAACAAACAGGTGGCATGGAATAATCCTCATGTCTGTTAAGTgggtgggggtaggagtgg  
gggtaggagtggggAGTGTACACATCTGCAAACGGTAACGTTGAACTTCCAAAGTAGGTCCAT  
CGGGC

>chr11\_9587424\_9587624

TATTCTGACCTGTATTAAGCAAATGTGCAGCTGGTAGGATAAGATGCTTGAACGTAGTAGACT  
CAATAGAGGACTGCCAAGCAGAGTTGATTTCTGTAGTTAGAACTAGTTCATCCTTACCAGTAAT

TTTTTTTTTCTTGTATACACTCCCAATCGGCTTATCGGCTTATCATGTACACACAACCTGGTTAC  
TCTCT

>chr11\_9587624\_9587824

ACCCAAC TAGATACTGGATGAGGTCATCTCTCAATCCTGTCTGAGCTGAACAAGGCCTTTTATGG  
AACTTTAAAGTTGACTCACCCTGAGTCATCAAACACAGCAATACCTAAACACGCTCCTGTTGC  
TAACAAAAGACCAGCATGGGATGTCTGTCTTACCTCCTTTCCCTCCCCTAATGAGACACGGCCCC  
TTGAC

>chr11\_9587824\_9588024

TCACTGGAGAAGAGTCATCACGTCTTTTGTGCTGCAGTAATCTGAACGAAGCCAGTTTAAATAAT  
CACAATGTGGCCAGCAAACAACCTGGCAGTCCCTGTGGTCATTCAGGTCATTTCCCTGTGTATGTCA  
CTAACCCAAAAGGAGAGGCAATTAATCAATCACCTGAATATTTAATAAGTGCCTGCATTCCTGTTG  
GGCAC

>chr11\_9588024\_9588224

TCACAGTTCCTCTGTTTATGACATTTCTGTGAAGTGAACCTTTTCAGTTATTGAAACTCATTA  
AATATAGAGAACAGTgtttgcgggaagt cagggaccccaaacggaggaccACATTAGAACAGCAA  
CCTTTGTGCCTCTGTAAAGGAAAATAAAAAAGGAATATTGGAGAAAATGGGACTATTCAGTTCCA  
TTCCA

>chr11\_47290224\_47290424

AGATCTGGGATGTGCACGAATGACTGTTCTGTCCCCATATTTTCTGTTTTCTTGGCCGGATGGCT  
GAGGCCTGGTGGCTGCCTCCTAGAAGTGAACAGACTGAGAAGGGCAAACATTCCTGGGAGCTGG  
GCAAGGAGATCCTCCCGTGGCATTAAAAGAGAGTCAAAGGGTTGCGAGTTTTGTGGCTACTGAGC  
AGTGG

>chr11\_57093424\_57093624

AACACACCAAGGCTACAAAGAAAGCATGAGGACATGGTTTCCAAAGTCAGTTCCCTTTATTA  
CATTTTCACAGACCAGAAATACAAAATGAAAGTAGAAATAGGCCCCAGGTAGGAGCTACAGGCCT  
GGCCTCACATGACCCCTGCTCCAGCAACTTGAACAGGACAAGCAGCAGCTACATCCTTAAGGTCG  
GGAAA

>chr11\_61582224\_61582424

ttggtgcgTTTTTtacagagcactgattggtgcattttacaaacctctagatacagaaaagttctc  
taggtccccattcgacccatcaactccagctggcttcacctctcaGGGCTATGAGACTTCCGTCC  
CTTCTTGGGGTCTTTCAATAAGTCCCTTTCTCTCTTAGCTAGGGTTCTCCAAAACACGAAG  
AGGAA

>chr11\_62320024\_62320224

AAGAAATGACTGTTAACCTTCTTAGCACCATCTGGGATCTCCCAGACCCCGCTCCACCCATA  
CACACACCAGCCAGGGATTAGCATCCCTGCCAAACAGGCCCTTCTCCATTCACTTCCGTCACTT  
CCTAATCTGTCATTGTCCACCCACCCCCAAAAGCAAATCTATCTGGTGATTCTGGAATCCAAA  
CATT

>chr11\_62433824\_62434024

GTGGCGACATAGACCAAGTGACACCCTCCAACCGTGCCACAGGCTCACTGGCTGATAGTTGCCT  
GGCGGACCGCTGTCTCTGGGATCGGCTGCATGCCACAGCCTCGTTTGGGCACTGTCCCCACCTTCG  
ACTGGTTCTTTGGATACGACGAAGTCCAGGGGCTCCTACTGCCATTGCTGCAGGAGGCACAGGCT  
GCCAG

>chr11\_62434024\_62434224

TCCTCTGCGAGTGTGGATGTGGGCTGTGGGACTTCCAGCCTATGTACAGGCCTCTACACCAAAT

CTCCACACCCAGTGGATGTGCTGGGGGTGGACTTTTCTCCTGTGGCTGTGGCCCACATGAATAGC  
CTCCTGGAGGGTGGCCCAGGCCAAACACCTCTATGCCCTGGACACCCTGCCTCAAGCCTCCACTT  
CATGC

>chr11\_62650424\_62650624

ACTCGTGGTTCTCCACTCAGGTTGACACTGTGGCCACCAAGGTGAAGGTGAGTGTGGAGCTGAT  
GGCTGGTGAAGTCAGATGCTGGGGCTGGGACAGTCCTTTCACAGCAAGCCCTGTAGACCCAGCC  
TGACTCCAGCTGAGGGTCCCTTTGCTCCTTAGGACCAAGGAGGAATGCCTCCTCCTATAGCCAAA  
GGATA

>chr11\_65187224\_65187424

caatgtggtaaaaccctgtctctactaaaaatacaaaaaaaaaaaaaaaaaaattagccaatgtgg  
tgggtgaagcctatagtcccagctactcgggaggctgaggcaggaaaatcacttgaaccaggag  
ggaggggtgcagtgagcagagatcacaccactgcactccagcctgggcaacagagtgagactccat  
caaaa

>chr11\_65187624\_65187824

ACTTGTTTTGATCTAGAGAAATCTGCTGACACCCGGCCTTCCTGCTCTCACCCCTCCAGCTGGGCAG  
AGGTATTTTGTAGACTTATTTGTAGAGGAAGAGAGCAGAACCCAGGCCCAATGTGTACCCCTCCTTA  
CTGTGGGCACAGCTTTGGCCCTTAAGGCAGGACAGAGATATCCATGTGGTTGTCTACCCCTCAGC  
TCATC

>chr11\_65256424\_65256624

ATGGACTGACTGTTCAAGGGTCTTGACCTGGCTCCTGAAGTTGGGGGGCTCCCACTGC  
CAGGAGAGTGGCCACGACTGTGGGGAGCAGTGGAGGGAGGTCAGTGCAAGTAGGGAAAAGTAGGGA  
TCTTGCTGCCACAAACAGTGGGGGTGGGGGTGGGGGGGCAGGAACAGAGGAGGCTGGACTGCAT  
GAGGT

>chr11\_65259024\_65259224

tgtgggaatgggaacttgctacctagaggtttattccactcaaactgggtggctctgatCCAC  
TATTACCAGTTCAGGAGAAGGCCCTGTCATTCTGCGGGCTTCTGTTTTAATCCGGCATTGTTGAG  
AAACACACCCCGACAAAGTGCCTGAAACCTTGTGGCCGCTACCCCTTGTCCCAGGAGATGTGTG  
TCTGT

>chr11\_67055424\_67055624

GAGGGTTGAGAAGGCACTGTCATGGAATTAAGTGCCAGTGGGGAGCTGTGTTCAAGATGGCAGAA  
ATCAGGAGAGGCTGGAACCAAGAAAGTCTGTGCGGGTTGAGTTTGGAGAGGGCTCAGGGAAGGG  
ACCGCCTCTGAGAAAAGGGGTGGCCAGGGAGGGCTGCAGTAGTGGTGAGCAGGTGAGCTCTGGGC  
ATTCA

>chr11\_67121624\_67121824

GTCCCAAGTCGTGTCCGGCCCGCCCCACCAGTCAGGAAGATTCCATACTGAGTAGGAAGGCAGAG  
CAAGGGTCTGGTCCCCCACCACAATGTGTTTGGATCCCTAGTTCTTCACTGGCAAAAATCTGCCC  
TGTCTCTCACAATAATGTGAGTCTGAGCAGAAAATATTaataataaacctaactcattgcacg  
tacca

>chr11\_71814552\_71814752

GTCTCTAAACTGGCAGTAGTGGCCATCGTGAATTGTGTTATGCGTTCTCGTGGCCACTAGGCCAC  
TTTTCTGGGCCATTGAGCGAACTCGTACCAAATGCCCTCGTATGCCCTTGTGATATACTCTTCTA  
AATGCCATGCGAGGGGCGACTGGGATCCAGGCCTGATGCTCCAGATCGTACGGTCTGGGTGCACA  
CACAC

>chr11\_118783390\_118783590

CTGCTCCTAGCTGCCCCACGTTGGGAGCCTCTGCTTGGCTCACCAGCTGGCCCAGCAGTGTCCAC  
TGCCTAGCTCAAAACCACCCCAAAGAGGCAGTGAGGAAATGTTTTGGAGGGTTCATGCTCCTGAG  
CTGCCAGGGCCCCCTGTGATGACGTGAAAGCCCAGGACCCTGCTGGGGACAACAGGGCGAACGAG  
ATCCT

>chr10\_105668010\_105668210

TCTGGGCACTGTCACCAACCCCCGGACTTCCCAGTTTGTGACCTCTCCCAGCAGACCCTGTGCCT  
TGGTGCCCAGAGGTCTGGCTGCTGGAATGCCCTGAATGGAGGCACCCTTGCAGTGCTGCACAAT  
GTCCCTCAGCAGCTACACAGTACCGCCTGGGCCGCTGGCCTTGTTCAGCTGCGGGATGAGTCAGT  
GCGAG

>chr17\_7486476\_7486676

CCTCGCCAGGCCTCGGCTCCCCGGAGACTCTTGGGGGTCTGGGCCCAAGGGTGATTCAGGTGCT  
GCCCTTCCCCGACCTGGGCTCGCCTCCCCACCTCCTCCTCTGCTTCACTGTCCCGGGCCCAGCA  
GTTGCCGGCGCACTCATGCTCCGAGGCCTGAGCCAACCGGAGGCGAGACAAGCACAGGGCCCTGC  
GCGCA

>chr17\_17740675\_17740875

gaccaggatccaagttataggggtcccaggcctgctgtgttgagcaggcctgatgtaactgct  
gggccagttacatcactctgcctcaatcttctcatttgtaacatgggcctaatgatgctttctc  
acgggcaggctgggaggCTAGTGACAATGTGGAGGGGAGCATGACCTGTGAGATCAGCCTGCCCC  
CTCTC

>chr17\_38267874\_38268074

AGAGGTGGGGAGTGAGTTCTCAGTGCCCTGAGTCCCTTTTAGAGAGAAAGGTTGAGGCTGGACTC  
ATTGGCTTGTGAAGGACTTGCAGCTTCCAGAGCACATGACTTCTGGGTCACCCTTCTGCTCAGGGT  
CATCCCTGATGACCCAAGGTGTCTCTGGAGGCTTGTAACTCAATCTCCCTCCTTACGCAGGGG  
CTGTG

>chr17\_38268274\_38268474

CCTCAACATTCTAGTTTGGATCGCTTTTGGGCTGTTTCCCTTGAAAACACGTGCCCCAgcaaggat  
tgaaaaactacctattggactatgctcactacctgggtgacaggttcagtcatacccccactt  
caccattacacaatatacccttgtaacaaacctgcatatgtaccccctgaatctaaaataaaagt  
tgaaa

>chr17\_38269874\_38270074

CTGCCAGAAAGAGCTGAGCCAGGCCAGGCTGCGGAGCTGGAAGCCTCTGTGGCTCCACGCTGGCT  
TCCCATCCCCATCCTCCCGGAGAAGGCAAAGGTGGCCTCTCCAACCTGTGGTGTCCCTTTCAGTGT  
CACAGGACTGGGGTAATACCAGTCACACAACCTCCAGTCTCTATTTACCTTTCCGAGAGCTTCAGG  
AAACC

>chr17\_42173474\_42173674

GCAGGGAGCCCCAAGCCCAGCCAAGCCCCACAAAGTCTCCAGCCAGGAAGGGGAAGGCAGGATA  
CCACTGCCTGGGAAGGCGGAAGTGAGAGAGGCAGGCCAACCCATTCTGTTTCTCTTCTACTTCT  
TTCTCCAAAGAAAGCCCTCACTCTCCTCGCTACAGCCCAGGGAGGTCACGAGGGGCTGGGAAGAC  
TCCTG

>chr17\_42173674\_42173874

TGGCAAAGTGGCCCACTCCAGCCCAGGCTGAGAAAAAAGGACCCCGAAATCCTTCTGGCTACCA  
GTATCTTCTGCCTTCATGAGCTGGCCTCTCTCCAGACCACCCCCAGCATTAAAGAGGCGAGAGAG  
GGAAAAAACAACAAAAACAAGTTTTGGTTTTTTTTTTTTTTTTTTTTTTTTTTTTTTTTTTTTTTTT  
ttgct

>chr17\_57914418\_57914618

ccaggcatggtgacaagcgcctgtaatcccagctacttgggaggctgaggcaggagaatcacttg  
aaccctggaggtagaggttgcaagtgcagccgagatcaggccattgcactccagcctgggggacaga  
gtgagactctgtctcaaaaaaaaaaaaaGTGAAGTGAAGTGAATTTGAGTCAGTGTACTTAATAGG  
ACAAG

>chr17\_57919418\_57919618

CGGTGTGATACCCTTCTTTTTTTCAGCTGTTTCGTGCCTTCCTTTCTTGTATCCACCAAAGTGGAGAC  
AAATACATGATCTCAAAGATACACAGTACCTACTTAATTCCAGCTGATGGGAGACCAAAGAATTT  
GCAAGTGGATGGTTTGGTATCACTGTAAATAAAAAGAGGGCCTGGGAATTCTTGCGATTCCATCT  
CTACT

>chr16\_14595499\_14595699

AATGTGCCACCATGTTATTAAAGCCATCATGGTGAGAGTTCCTGGGCAGGCAGCCCGCTGGAATG  
CTGAGTCATCTGTTCCCCCGCTCACAGCTGGCCCTCCTCCCCAGCACATGCTCTGCCACAAGCA  
CACTCTTTGGGAATGCATTAGGAAGCAGCTACCTGAATGTATCCTGAAAATCACAGACAAGGCA  
CTAAA

>chr16\_14595699\_14595899

CACACACCCATTGGAGCCTGTTCTGTCAACTCAAGCCAGAGTGCAGGCATAAATCACTGCCGT  
TTCTGGAAAGAGCACAGGCACACCTTGCCTCAGCTCTCTAGAGGCCTTAGCTAAATGCTGTTTA  
GATTATTTTTTAAAAAATGTGGTTTTGACTGGTTCAGGATTTAAAAGAGTTAACAAACATCATATG  
AGCAG

>chr16\_87422099\_87422299

TTCCAATCAGAAAGAGGAGAGGGAGAGGCCGAGGAGCCTGAGGCCTGGAGCAAATTCCTCCG  
CGTGACTTGCCGTCCATATTGAGTGTGGCAAAAAATAACCCCGATGCTTTCTGTAGGTCAGGTTA  
ATGTTTTGTGATTCATTTGACAGGTTCTTACACACAGCTAGACAGCATGATTTACAGCCACTTAC  
ATCAC

>chr16\_87812499\_87812699

GTCTGTGGTCCAGGTGCGCTGGGGGCAGCGCAGGCCGGGTTTCAGGAGAGCTCGGCTCAGCAGCAG  
CCGATGGAGCTTTCCTGGGGCTCCTACCTGGCCGCCAGCTCCAGAAGCCAAGCCAGGGGCTCTT  
CGAGACATGGTCCCACCAGAGGAGAGACCGAGCCTCGGAGAAATGAACGTCTTAGGCCATGGGAC  
TCGGA

>chr16\_87812899\_87813099

ACCGCAGTATGCCAAGGTTGCATCACCTCGCGGGTCTAAGAGGAAGGATGGGGACCAGCCCGC  
AGGCGGGCTGAGCCTCCTGGCAAAGCCCTTTGTCAACGTCAACAGAAGCATCTGGCGTCTTTTC  
TGGTCGCGGACGTCAGAGCTGGCTGCTCCGGCACTCAGCCGGGTGGTTGGTCCCCAGGCAGCCGC  
TGGGG

>chr15\_93374396\_93374596

aagcttttgactgagatatgcgtaagcaaggcaaaaagatcccatagtccaggaatatcaacca  
gtccagtttcccaaggaaactaaaagtaactgaaaatgagaagggtgccatataggaaaattgaa  
gggtggggcataattattaatacactgctttggaaatgctggtatggaagattcatatatggactt  
caaag

>chr14\_74208447\_74208647

CACTTTCACCCAGCACCCAGAAGGGGAGTAATTTTCCTCCTCCATTTCTTCTCAGCTCCTGGGC  
CTTGAAGAGAGTAAGAGACCCCTCCTCGTGTGCAGCCTTTGTCTTTTCATATATGAAGCTGGAGGG  
AGGGAGAGGCACAGAGACTAGGAGGGCATCCAAGTCACCCCTCACCCCAAGAGGGGAGTGGG

GGGAT

>chr19\_4374800\_4375000

CACCCCTGCCTGGCCCAGCTCCACATGGGTGTGGGGGAGGCTGCGGGCTGCGCCTGGTGGCCGTAT  
GGGGCCTAGGCTGGCCAGTGCTGCCAATGGTGGGGGCTCCCTCACCGCCCGTCTGGCAGAAGCC  
ATGGGCCACACGCTGTCCCAGCACATGGTGGCAGGGCGGTGACCTGGGCTCGGCTCTAATGACCG  
GCAGC

>chr19\_4375600\_4375800

GGCTCCTCTCCCAGGAACAAACCACCCCAGAGCTCCAGCCCAGCGAACACATCTACATGAAAA  
TCAGCCTCATGCATCATGCATTGTAATTTCTCATCTTGGGGACCAGGCAGGAGGGCTGTGTGACA  
TACAACTGGTAAAATCAGTTTCCGATGAAAACCTTATAAAAAGGAAAAAGCCAACCCACAAACAAAT  
GAGGC

>chr19\_4375800\_4376000

GATAAATCCCCCTGAGGCTCCGCCTGGCAGGGAAACACCAGCTCTGCAGCACTGAGCACAGGCTGG  
TGTTCCCACTGGGGGACAGCATGGAGGATCTGCGTCCAGGGGGCAGAGTGTGATGACATCACCCAC  
ATGCACAGGAACGATAAGGCTTTCTTAAAAACGATCTTTTCTCAACAGCTCCTCAAAGGAGCT  
GAGGC

>chr19\_8067000\_8067200

CTCAGCCTTCTTGTCCCTAAAGAACCCACGTGGTTCTTTGAACACACGATGttctctgaacactg  
cgatgttcccacctccgggcttggtgtatcctaaaaagccccaccctattgtctttgctggtt  
agctcctccccaccgctactgcctcctcctccaggaagcattctgggctctcctgtgccacc  
caggt

>chr19\_13276000\_13276200

CTACCAAGAGGACACGGCAGTCTAGGAGCTCCCTAAGGGGCAGGAGTGGGCTGGGAGCCTTGGAA  
ACGGTTTGTTCCTGAGGACCCCTGAGAAGTCATGTTGGGGGAATTAAGTCTGTGTTAATTGA  
GGCTTCAAGCCAAGTCCCCTCTGTTTACACAGAGAGTCTGAGAAATGCCCTCGGAAGATTCCGAG  
AGCCT

>chr19\_13957200\_13957400

tctttgggatggctttggggccagggcattacacttcctaagcctcagttttgtcggtgaaaaa  
tggggctgaaaatgcgcaatttgagttggtaccaggctttgaggtgagacgtgtgatgtgctga  
tcgcagGTAGAAAGAGGGTAAGTGATACACCAGGTACACCTGGATCAAGGGACCCCTGACAGGCC  
AGCCG

>chr19\_13958800\_13959000

GTAGGGGTGCCACAGAGCCTAGGCTGCGCTGGGGGACTGGGGAAGCGCATCCCATGAGAAAGGCC  
CTTAGCTGGGTACCAGGAACCCAGGGAACCATAGTGTCCAACACCCCAATCCCCTGGGG  
GAGGGGGTTCAAGTTCTGAGAGTTGAGGGACTGCAGCCAACATGCCTGGGTTCCAATCGAGGGTC  
ACCCA

>chr19\_18475400\_18475600

gtgacagagcgagactctgtctcaaaacaaTTGGACTTAAGATGGCATGTCTTTGTTTTAGGGCC  
AAAAATGAGGCCCCCTTGCTTAAGGCATGGGGTCCGTGGCCAGGCAACGGGGTGGGACTGCTGCC  
CCAGATGTGGCCATGGGGGTCGTGGTCTTTCAACACCAAGCTATGAGCTGTGCGCCATGGAGACC  
AGGGC

>chr19\_18475800\_18476000

ATGTCCCGGCATGTCTGAGCAGGAGGAATCCGGGCGGCCAAAGGGTTTTATGTAGATTGCTTTT  
GGACACTCGCCCAGGAGTCAGGAGTTGATTTTTATCTCACTTCCTGGTAACCTTGAACCTTACCAG



GCAGGGATGAGATGACGTAAACTTCCTCAGATGATGTAAGTTCAGCCACATCTTGCTGCCCATTA  
GGGAG

>chr19\_18476000\_18476200

AGAGGACGACCCCCACAGTGAAAGTAATTGAGTGAAATGCACGTTCTGGAAATCAGTTTCTATTT  
TGGCCTGGAGGAATGTGGCTATACTGCTTCCCTGAGTGTGACACAGTTGGAATCTAATCTTGTTG  
GTTTCCCAACATCTAGGtttttgtttgtttgtttgttttatgatagggtcttgttctgttgacc  
aggct

>chr19\_18484800\_18485000

TGGGTGAGGCTGTCACCTCTCCCTCCCTGTATGGTGCTGATAAGGGCGTGgggaggcagagaca  
ggcagagatagacatgatgagagacaggcagaaatggagggagagccagggagagagagacacaa  
agagaaaaagTGAAATTCTCCAGATATTTTGTTTAGGGTGAGGACACGGAGACACAGAGAGGGA  
CTTAG

>chr19\_39175560\_39175760

CTTAACCCACCCAAATGGCTTtttgtttgtttgtttgtttgtttgagacggaatctcgctcttta  
gccaggggtggaaggcagtggcgtgatctcagctcactgcaacctctgcctcctgggttcaagcga  
ttctcctgcctcagactcccaagtagctgtgattacaggcacatgccaccaagcccagctaattt  
ttgta

>chr19\_39175760\_39175960

tttttagtagagatagggtttcacatgttgaccgggatggtctcgaactcctgacctcgtgatc  
caccaccttggcctcccaaagtgctaggattacagggtgtgagccaccgtgcttggccAACCAC  
CCAAATGTGTACCCTACACCATCCTAGTGCTTGGGAGCCAACCCCACTCACAGGAGGCTAAGG  
GCAAG

>chr19\_39176560\_39176760

TCGCATATTCACCCTTCCACCAGCAGGGCCCAGTTTACGGATCATTGGAATACTAGCAAAAAAAC  
AAGCCATCTGCTGGAGAGATTGAACAGAGGGAGAAACAGGAGTGTGTTGCCCTGCTTCCAGACACC  
CCTTTCCTGTGGCAGTTCCCTGCACCTGGCAAGATCTACTGGGAATTCCCAGGGTCCCCTAGCT  
CAGGA

>chr19\_39176960\_39177160

ACTTGCTATCTTTTTGAAAGATCAAAGTTTAAACCAGATGATCTGTAGTCCCCACCCCCACCC  
TGAAACCTGAGCTTAGCTGTAAGCATTGAAAGTAAATGGGGTGTGTTGTAGCTCACCTCCCTGTT  
CTCCAGGTGAAGGGCCCCGTGTGCCTGATCATTTTCATAGCAAAATGCTAGATGGGGCCAGAGGAG  
GCCCC

>chr19\_46221360\_46221560

GGTACCCACCTGTCCAGTCGCATCCCTCCCCACTCCTCCGCCCCGAGGCAATACCCAGTGCA  
CCCTGGTGGGCACCTGATCTGGCATACTAGAAATACTCAGGACCCATCTGATCCCCGGTAGGAGT  
Gatcgtctccacggtatggatgaagaaactgacgcagggcaggtctcctgaccacaaggtcacac  
agagc

>chr19\_46221560\_46221760

tggagtgtgagctggagcagggatatgaagccagggaatctgatttcctagtcactgtgcctac  
tgtttcactataTATtccctggggtttcagctcgaccaccctcctctaagaagctgacacccc  
aatccccctaggccaggtcaggcTTCACCCAGGGCGTCCATGCGGtgggctcattgctgtctatt  
cctca

>chr19\_47611360\_47611560

CTGCTGAATAAATACCAATTGCCAGAAATCTCAGGAGTCATCCTTTTTTCTTAGCTGTGCTGCCA

AGGCACAGGTTAAGCGCCTGGCTCAATTCAGCTACTTTGCTTGCTATTCACTCTGTCACTCAACT  
CTCGGTGTGAATCGGACCCAGTTGCTCTGGCACTAGAATTACTGTTTCGTGGGGACCAAAATTAAG  
TTCTC

>chr19\_47612360\_47612560

TGCAACATCCATTAATTTGATTTTAACTAATACTGGTACATCAGTCTGGGGGAAAAAAGGCAG  
TACTGTGACATTTCAAAAACAGATTACCAAATACAGTTTTGACTTAATTACTGGGGCTTCTAG  
GTCTTAATGGATGAGATTTCTTTGAGAATGGAAAACAATAAACCGTTGTGTTGACATGCCTGTGA  
GCTTT

>chr19\_47612960\_47613160

TGCAGTTTCCCTCATCTACATGTGCGTGACCTTTTTTTCCTTGTAAGAAGGAAAAAACAAAACGGT  
TCTTTTGGAGAGGGCCAGGGTCTCTAAGTATGTCAGGGATCAAAGTGGGAACTGGGAAAATG  
CAACTTCAACGTGTTTTGTCTTTAACGGAECTTATGCTTGTAACACATCAGAAGTACAGTGT  
TTGGT

>chr19\_49120588\_49120788

AGAGGCGGCCGGTTGGTGCCTCATAACAACCTCTTCAACACAACCTGGTTGAATGTGGAGTT  
GGTTCTTCTGGCCAGAAACCTGTATAACTGGAGGGACGGGAAGACAGTGAGAAGCTGGGACAGCC  
TGCTCCCCCGCAGCCTTCCAGTGAAGGGGCAACACATGATGATCTGGACTAAAATAATCTTTAT  
CCCTT

>chr18\_3603000\_3603200

AACACAAGAGGACAGAGCTAAGGTGTAGGAATGCGGAAGAACTTGCAGAACTAGAGCTAGTCTT  
CGGATTGAAATGAATTACCAATAAAGGGTTGGGAAATGGATCAAGGAGAGGGAAGCGTTTTGATG  
GTCCCTGCTCCGAGGTTTCCAGCCATTTGCAGTTGCTGATAACCTTGTGAGGTCACCAGATAAAGG  
CAAGT

>chr18\_3606000\_3606200

GTCGGGACATTAAGAAAAAAAAGGTCTCGCTGTGGTTTTGCTATTAGATGGAGAGATATTCAGAT  
TTCATTTTTAAAATGAAAGTGAAAGATTAAGAATTTTGGCATCCTGACCCTTTGTAGAGGCCAT  
TCCTCAGAGGCACAGTGTGCAGACAAAACCTATCCTAGAGGTGCCAACGAGAACAAGCTCTAATGT  
CTGTC

>chr22\_36726054\_36726254

aatgtgaacatacatgtatgtacatagccatgcacacacacggatgtatgcacaggcacacacac  
TTCAAATTCGGAAACCCAGAGCCAAATTCAGTGTCTCCTCTCCATCCACCCGAGCGTCCCTAGC  
TCTCCCCTTCTCCAGCCTTCCCCGTCCAATTCCTGAAGCCAATTTACCACTGTCAACACAGCCT  
AACCA

>chr22\_36726854\_36727054

AACGGGAGGAGGCCGCCAGGGACAAGCCTCTTCTGGGACACGAGCCCCCTGCCAGATGAAAGTCT  
AGCCGTGGTAGGCGCCTGAACCCACTGCCCCAGCCCCCTCTTGGTGAGGGTGGGGTAGAGATGG  
GGTTATGAGTCACTCTGCAGTAGTTTTTCAGACTTTTCAAAAAGCAGCGGCAGTCCTTCCCTCAGAT  
AAAAT

>chr22\_36767254\_36767454

cagaatgtgactggtatattgaggacagggccttgggaagaggttaattaagttaaaatgaggtcctt  
cgggtaggcctaatcccatggctggtgtccttataagacgaggaagagacaccaggcgtgtgcy  
tgcacagagcgaagaccatgtgaggacacagttggcagacggccatctatgagccaaggagagag  
ggctc

>chr22\_38576654\_38576854

TTCCACTCCTTTCAATTCTGCCTATGACCCaacagtaaaatcatgtatTTgtacagggccatact  
ggttataaagctttaccttctacattttctcattcaaattttgaacctcatggcagacttacgag  
ggcaggaggtacagttcccctgtcacagatgaggaaactgagacttggacagAAAAACAGGTTCCA  
AACTC

>chr20\_10492000\_10492200

CCATGCCATGGGGCTCACACTGCCCTAGGGATACTGTCAGGGATGTTGAACTCCATGAGACTGTC  
TGTTACCTGACTCCCAGGCAGACAGTAAGGCGATCaggcttttccttaagttgagctgaaagct  
gaaatctgcctccttgaaacctacctccagctgTTTTaattttgccagcagagtatgtccagctc  
ttcac

>chr20\_45946793\_45946993

tcctccccGACTACCGCCCCCACTCCAAAAACACAGCTTGCTTTCTGGAAGGAGCATGTTAAAT  
CAATTCCACAAGTTCAAAGCTATGGAAAACACCGGCCGTGTGTAGACTGGAGACCAGAATCAGCCC  
AGGACAGGATTTCTGCATTTCAATCAGACTGAAAATGCCAGGTTTCCCCCAGTAACTGTGAAGGC  
AGGGT

>chr20\_45977993\_45978193

AAAGGTAGTTGGGTTTAAATGAGAATATTAACACATTTAGCCATCTGATTTTGAACCCCGTTAAC  
AATTTCAATTTACACCGCATCTGTAAAGAAAGCCTGTGACACAAATCACCAAAGAAACAACCTGACA  
TGTTGTCACAAATGGTTTTTCATCAGGAGAAAGCAGCCTGCTAAATTTAAACACATCGCTTATATG  
CAATA

>chr20\_45978593\_45978793

AAAAAACCCACTTGAAGGATTTCTGCAGCGATGAAAACATTCAAAGGTGTATTGATCATGGAGGA  
AGGCTGCATTCAAGGGAACCATTTATTTGGCTTGTAACAGCCTAGAGGAGCTGAATACTTCAGGCA  
GGAATGCTGCTGAGAGACGAGGAAAATGCAAACCTAGTTATGTGGTGGCTATTTGCTTCTGAGTTT  
TAAGA

>chr20\_45988193\_45988393

CTGGGGCAGGCCTACGAAGGGCTGGTCCTGGGCTTCATGGAATGTGGCTGATAAGCAGGAAATAA  
AACCAAATGTTGCAGGTCTCAATCTAGAAATCCATTCAGCAGCTCCTCTTAAAGCCCCACTGCAG  
TGAGTATCCCAGCAGTTACTTCTAAATTAGTGCTTTACATAGACTGATTCCTGAAGTAGGTGGCA  
TTGTT

>chr20\_45988793\_45988993

attcaaatgccccctcattacagattgaggcccagaggaagcgacCCTCTCCCTCCCAACCTCCAG  
CAAGATGCAAGATGTCAAGGGGGAACACTTTGCCATCTCTAAAATTAGGCTTTTATATCCCTGA  
AACcagtggttcaacctatggggggatTTGCCcttcagggggcatttggcaatgcttggagacgtg  
tggt

>chr20\_52239793\_52239993

CAATGGGTGGTTATTACTAACACCAGTAGGAAAAAATATCACAGGAGCTTCATGACAAATCCTTA  
GGCAGGGTTTAGGTCTCACTAATTTAGAATATGCCTGGTAAGCACTGGTTAAAAATTGATGATCC  
CGGGAAGTCTTTCTCAAACGATTTTGTAAAATACCTAGGAGACCTTGAAGTGTCTGTTACGGAG  
GTTTC

>chr21\_35319930\_35320130

GATACATAGCCCAGGGTATTCCCATTCCTCCACGACACAAATGACAACCTCCTTGAGCTCTGAT  
GGCTTGCCAGGTGGCTGATGGCGTGGAGAACCTTGCTCATGTTTACCTGTTCTTGCATCCATTAC  
TCACCTCTGCCACGTGCCCCACACTTGCACACAAAGCCACAGAGTGGCTTAAAAAAAAAAAAAT  
GAAAA

>chr7\_1083274\_1083474

GGCGTGGGCCGTGGTGAGCCTCTCCCTGCCCTCCCCTGGAATAGAAAGCTGATCCCGACGTCCC  
ACTCCGACCCACGGTCAGGAAGCCGTCTGTCCAGGAAGGTGGCTGAGGTACATCCCTGAACACA  
GTAGGCCACAGCATCATGCAGCGGAGGGCCAGTGGCCGCTATTCTTCCTGCTGGTGTCCACTCG  
GCCCC

>chr7\_44678475\_44678675

TGGGTGGTCAATGACTCAGCCTAGTCTTGATTTATCCCCCAGGATGGGGACAGACAGCAGGGGAG  
AGATCTCAGGTTGAGATGAGTGTACAGTAAGGGCTGGGAGTATCAGAAGGGGAAACGCTCTCCA  
GATAGTGACAAAGCTAAGCGACCATGTGAAGGGAGAGGACAAACATCCCATGGAAAGAAGGGTAG  
CTGCC

>chr7\_44678675\_44678875

AGGCCTGCGGGAAGGAAGGAGCATGATGCTGGGGCATGGGAGCAAGTGGACAGGGAGGGCTCTGC  
AGGTCCCCTGGAACCTAAAGCCAGGGGTTATGGAAGGCAGATCCAGATTCAGGTGTTGAGGAT  
GAGGCAGGGGTGGGTAGTTTAAGGAGCTGGAGAAGAGGTATCTCCTTGGGGAGTGGAAAGATGTTA  
GAGAG

>chr7\_100143464\_100143664

GGAGGAAGGGGCTCTCGTTTCTAAATTGCTTCTTTTGGCCAGCAGTGGCCTCTCTGTGATTGAG  
AAAGAAAACTCTGACTCATAGGCCATGTAAGTGGCCCCCTCCTAGGCTGCAGTGTGCTTGG  
TAGAGAATTCTCCCTGCCCCCAGACTGTGGCTCTGGTTGTACAAAATCCAGTCTACAGACATCAA  
GGTCA

>chr7\_104585964\_104586164

acttgctcagagtcctactgccagtggtgtgaaagccagaaccaccaccTCATTGccttctgt  
atacatagctttaacagtttgcaaacactccttatatgctttaatttcacatctgatcctGGACTGAG  
AGCAAATATTTGTATTTCAACCAAAGGCCAAATGctcagtttcctcatctgagaggataataag  
agtac

>chr6\_7146801\_7147001

TTAAAAGCCAGTTTGGGTCTGATATAAGTTCTGCTTCGTGTTTGTGTCCATTCACTCCGTAACA  
TACCATATATAGTCATGTTTGGAGCTCACTATAACACACATTGCAAGGGAGCCGCTCATAGTGCAC  
ACATCCTTTGGCTGTTAGAAGCAGACTCACATAGGCTATTTCTGGTGTGTCGTGGCTTTCTTCTT  
TCTTT

>chr6\_7147001\_7147201

TTTTTTTTTTGGTGGGGAGGAGGTGGTGGGGGAGGGAGAGGAAAAGGAGCTCTTTTTCTTCCAT  
CTTCACACTGGTTGGAAGATGTTTCTGATTCTAGTTTGTCTGGCACTCTGAAAGCTAAGGAAGT  
TATTGTCATGGCAGAAGAAACAATTCTCTGTGTGCATCTGTTTTAGAATGAAACCGTACTTTTCT  
TAGTA

>chr6\_26026021\_26026221

atctcatctggtctcagcatttatctctgctgatgactcacacatttttatctccagctcaga  
cctctcaccgaactcacttattcaactgcctattcactatactcctctgTCAGGAGAAGCTTGT  
TAGCAAAGTAACCAGAAAACAAGTTGATTTTTTTTGGCTGAAGTAGCCATCAATATATTTGTTAC  
TAAAT

>chr6\_29932421\_29932621

ggacacaaaacgtccccaagcattcaagatccaacaacaagaagaggagactccctctgcattt  
ctgcagaggctcagggatcaagtgaaaaatattcaggattaaatccagaggaccagtagggca  
aggccttttaaggttaattttgtaactaaaagctgatgtaataactaagaaactgcaaaaga

ttaac  
>chr6\_35438022\_35438222  
AGGTTTAAATAAGGCAGGAAAAGTTCCCTTCCCTGCTCACACACAACGAAAACATGGTGGCCAAAG  
TGGATGAGGTGAAGTCCACAATCAAGTTCCAAATGAAGAAGGTGAGTGGGTCTGGCGGGTTGCTA  
TGGGTGAAGGTGTTGGCAGGGTCTAAATCTTATCCAAGTCTCTAAATATGCCAGTAAGAGCACCC  
ACCAG  
>chr6\_43141422\_43141622  
TCCAGAGATCCTGATAGGACACCCTGCCCTCAGAGTCATTAGAGACGAAGGTCATTATGGGAATG  
GGGAATGACATCACTGTATAATTCTTTTTCCAACCTCTCAAGGAAGGTAGAGATAAAAAGTTTG  
CTGACCTGCCCATCTCCCTCCTCACCCCTCAGGCCTATGAGCTGTCCACGCTGACAGGGACACAG  
GTGCT  
>chr5\_172191995\_172192195  
ACACatgaatgaatgaatgaatgaacgaatgagtgatgaatgaatgCGTGGGCCTCCTGCCTAGCTTT  
AAAAGCCACATTC AAGGAAAAGGTGGCTATGAGCTTATCTTCCTTGGCAGAGCAGTTTTGTCCAC  
TGTGGCGCTAGCAGAGAGCACACCCTTTGTTCTCCACGGGGTGGAAGACACCTCCTCGGTGGGCA  
GAGGG  
>chr5\_179246794\_179246994  
GGGAAGGATCATTACACCTGTGGACCAGCCCCTGCTGTGCGCACACCCACACATCACCTTCGCA  
CCTGACTGGCCCCATCCAGCCACTCTTGCCTCCCTCTGGGTTTCCTCCCCTGGGAGGTTTCTCCA  
GCTCCTGCAAGCCCTGGGCTGAAATGGCATGAGTTGGACCCAGCAGGTTCTGACCTCCTACTCAC  
AGGAC  
>chr5\_180668994\_180669194  
CCTCAGCAATGCTGAGTAACTTATTTAAAGTGAGGGAGGCCAAACATCTTCTGTAGGTGTGCTCT  
GCTTTCCAGTTCCCAAATGGACTGGATCTCCCCTGGGAAACCAGCCAATTGCATCCACCTCACTT  
CTGCCCAGATTCTTCCCAAGGCCCCAGAGCTAAGTGAGCAGCTACTTGC GTTGTGAGATCCCAGA  
GGCGC  
>chr4\_38673805\_38674005  
TTCAGAGGGAAAGGGAGATGATTGTGGAACCTCTACTATAAGCTAAGTGCTCTTATGTTAGCTCC  
TTAGGCTTGACATAAAAACCTCATT CAGGGAACAAGCCCGATCTCCTGTGGGGAGTGGGGAGGGA  
GCCCTCTCAGGAAGGCTGAGGCCTGCCTGTCTGTCTTCCCAGTACTGGTGGCGGTGTGGGACGC  
ACCAC  
>chr3\_39193396\_39193596  
GAAACTGCACCTGACAATGACTGCTTCCTCCACCTAAGTGGGGCCTTCTTCCCTCTCTCattcat  
tcattcaacaatacacactaagctcacatatgtgccaaactgtggcaggcactcgcgcatgc  
agggagcaagacttatacaactgctgcctcttgaagctctgaattgagcagggaggacaaataG  
AGTGG  
>chr3\_48507396\_48507596  
TGGCACCACTGCCCTGGTCTTCCAGCTGCCTGTCACTGGTATGATGGCCCCGGTGCATTGTGCC  
ACCAGCAGGCCACAGCTGTGGATCTTGAAGGCCTCTGGGGTCCCCGGGAGCAGGGGAGTGGGT  
GTGGGGGGGAACGGATGGTGGT GAGAGGGACAGACCAGGCAGGCTGACGAGCAGGGCGGGCCTGG  
CTCAC  
>chr3\_52028560\_52028760  
AGTTTGTGATTCACCTCCACGGAACAGAGAGCAAAAGTAAAGGGAAGGAACAGACTGGGGACATGC  
TCAGCTCTCCCCTAGACCCTCCAGCCTTCTCAGCTAATCCTTAGAACCCCTGACACAGGAAGAG

AAGCTGACCCCAACTCCAGCACTGGGTCAGATGGAGGTCATAAGGCTGGTCAGTGTGGGAATGTG  
CCCTG

>chr3\_53304160\_53304360

AGGCCTGGGGCTGGAGAGGCCTGGAACCTCGGAGGTAAGTGCCAGTGTGAGGCCAGCCAAGCC  
CTGCCGGCCCTGCTTTCTTTGTGCATAAAGAAAACATGCCGAGTCATTGTGACTTGCACTTTTTG  
ACTAGTGCGGTCAGGCTCTGTGTGGCACTGCCGTAGGCCTGGGTACCTCCTAGTGTGAGGAGCAG  
GAGCT

>chr3\_171855906\_171856106

CCTTTAAGACTTTAGGCCTCTTTCTTCCAAGAGCTCTCTCAGACCACTGCCTGACTTTTCCCTGA  
ATTCTGGAGGAGCAGGTAGAGGTAGCACTACACAGTCTGGTTATATGCGTAAACCTTTCTTAGC  
TCTCGAATTAGATGTGAATTCAGTTGTGACAGGAAACAGTGTATCTTACCCTGCTCCCCAGCCA  
CACAG

>chr2\_43446496\_43446696

cagacacactcacatccaaacacaGCCATACCCACAGACCTCCCCCACATAGCCTCCACATGC  
AGAAGCACACAGATCCACACACCAGTACTCCCTAGGGCGACATCACACATGCAGACCCCTGAAC  
ACCTGCAGACGGAGCAACACCACAAACCTCTGCACACCCACAGACAGAAAAGGACGCAGAAAACAC  
GTACT

>chr2\_87785085\_87785285

CTAGAACGTGACCTGAATGTGAACTAGACATTCGTTTTCTAAACCCCATGAGACCCAGGTATTC  
TTGACATGTGTAGAGAGGATTGAAGGGCCCCGAGGCTGTCTGTCTCTCCGTGGCCCTGGCTC  
TCCTTGGACCAAATCGAATGCATGGGAACACACCCCCAGTTGTCTTTTTCTTCGGTTTATATA  
ATTCC

>chr2\_101620368\_101620568

AAAAAAGGATTGTTACTGCCTAGTTTAAGGGTTGGTTTAGGCTGGTTTTAGGAGGACATACCATC  
TACAGTAAGTCTTCACTGAGCTTTAAGCACACTGGCCTACTGTATGCTGTaaaaacttggttttg  
ttacataagacattgcttaaagtcagtttccaggagcctatcatcgacattgaggatttCTCACA  
TGATAC

>chr2\_112221329\_112221529

tcactatggtgcccaggccggtctcaaacttctgggctcaagcaatcatcccacttgcaccttcc  
aaagtgctgggattacaggcgtgagccaccatgcctagcTAAGCTCTTTAGAAATGATTTACTCC  
CATTTTTTGAAGTTTGCCATGTCACAGAAAATGAGACCCCACTGAGAGATTCAAATGTGCGGGAA  
GAAAG

>chr2\_112221729\_112221929

ACCCACACAGGCTGGGTTTTCAGTTTACCAGGGAGCAAACACCATTATGCAAATTATTTTCTTG  
CTCAACTCCCCATCCCCATCACTGGCTTACATATTCATTCTTCACTCTGAAGTTAATGTACACA  
AGAGGCCAACTAAGGATTTGCATCCTATTTACTTTAAAATGCCAGGTGCAATTTTGAAACAAGA  
TTCTC

>chr2\_219270156\_219270356

atatgctaggcCCACCAGCTAAGTGTGTGTGGGGGTCTCTACGCCAGCTCATCAGTGCCTCCTT  
GCCCATCCTTACCAGGTGCCTTTGGGGGATCTGTAGGAGGTGGGACCTTCTGTGGGGTTTGGGGA  
TCTCCAGGAAGCCCAGCAAGCTGTCCCTTCCCCTGTGCCAACCCATCTCCTACAGCCCCCTGC  
CTGAT

>chr2\_219270756\_219270956

CACACCTAGAGGGCTGTTGGTGGAGGGAGGGGCTGCCCGCCCTCGACACTTCAGGTGGGAAGGG

CAGCGTCAGAGCACAAATTTGAGCCTCCAGGCTGTGCTCGTCTACGTCTTCCCGCCTCGGGTATG  
TGGTCTGCAAAATGGAGATGTGCCCTATTGGCAGGACTAATTAAGTGCCTGGACACAGACGACAG  
GATAC

>chr1\_8773013\_8773213

ATGGAGGACTATAGTTTATTCTTCCAGCCAAGGATTAATGTCCCTAGGGAAAAGGCCAAAAGG  
TACTCATATAACTAGAAAAGCACATTATCCTAAAATAAGACTTGTATAAAAATCTGAATCATAAA  
TCTTACAAGATACCTTTCAACATTAATAAGGAACATAATTTAGTAACTGGAGGAGGAACAGTTTGT  
CTTTT

>chr1\_8933413\_8933613

AGATGAAAGGTTCTGAGCAAGTCCATCATTTTCATGTTTTTTGAAAAGGATTAAGACACACAAGAG  
AAAGTTCATTTCATTTCAATTTCAAAATGTCCAACCTCCCAACAATCTTCTAGCATCTGGGGTCTT  
TTGTTGCTTAAAGTTCATTAATATCCAAGTAGAAAGTTCACCCATTGACTAAGCAAACCACTCT  
TACTG

>chr1\_24307213\_24307413

CCCGGTTGGTCCAAGTTAATGTCCCTGCTTTTTATTTTGCCTTAAATTTCCCGTTTGGTCCAGGTTA  
TGCCCTGACCTGCGAAAGAAGGATTTACAGCTTGTATTGAGTGTGTAAAGGAAGGAGGTGTGTGC  
CCTTGCGCAGAGCTGGGCCTGTCTCTCCAGTGTTTTTCAGCCTGCCTTTGCCCTCACCCACACC  
TAGCC

>chr1\_27049613\_27049813

TGGCTGGGGAGAGAAGGGACAATGAGAATGATTTATGCTGGTCATTTTATGTACCAGGGTACATA  
GGGTGATTTTTTTGGTGGAAAGCCTAGTCTGTCTAAGATATTACTCCTGAGATCTAAGTGAGCCA  
CGTGCAGCTGGCAGGAAGCTGAAAGCTGTTGGTTGGGAGAGGCCTTAATTTTTTACACTTGCCCT  
GCCTG

>chr1\_27050013\_27050213

TCTCGGCTCTTTCTGGGTTATCAGGCGCCAGTCCAAGTCCCTCCAGGCAGCCAGCTTCATGGCCA  
GAGATTACGAGCACTAACCTTCTTGGCAGGGGCGGTGTGGCTTCGAGTTTATGCAGATTAGCCAT  
GTGTTTCTCACTTCAAGGCGTTCCACAGGAAAAGCCTTTTCTGTGTTTGGCTCTCAGTGGGCGG  
TTCCC

>chr1\_27113213\_27113413

TGCCACGTTACTCACAGGCTCTGGAGCTGAGAACAAGTGCCTGGCACTGAAAAACCTGGGGGAA  
GGGCCATGAACTCCATTTTTTCCCCCTTCTCCAACACACAACGACTAAATATGATTTGCCTTTT  
CTCCACCTTGACACAACAGATATCTGAAGGCAATTTAGGTCTCAGGGCCTGAAATGAGTTACAG  
AGTCA

>chr1\_28835413\_28835613

GTAGGTAAACTGATTTTTTTTTTTAACAGGGAGGGTTTGGACAATCTTTGGCAGACTTGGAGCAA  
AGATTGAGGTGCATTTTCATGCCTCCttttgagagtcttgctctgtcgcccaggctgtagtgcagt  
ggcgcaatcttgctgcaacctcagcctcccaagtAGCTGGGATTACAAACATAAGCCACCACGC  
CCAGC

>chr1\_36839413\_36839613

TCCAAATGCTGCACTTTATTGCCTTGGGGTTATAAGTGAACCTGGCTGCTTCTAACCAGAGCTCT  
CTTTGTATAGGATGACCCACCCCTGAGGCCTGCTCTGCTCCCAGCCTGTGGGAGAGTACCTGC  
TGCAGCCAGAGAGGAAGTGAACCTCAGCCAGTGGGAAGTGGGAGGGGCGGTGAGCAAGAGGGCCCT  
GCGCC

>chr1\_36852413\_36852613

TGTCTTTCCAGCTGTCCCCTGGGTCACTCTATATCCATGTGTGGGCACACGTGTCTAAGCTTGTG  
TGACTGCTGGGTTTTCTAGGGTGTGTGGCCACTTGTGTGTATGTGCATTTGTCATCTCCACAT  
AGGCAGTGCCAGGACACAAGAGCTGATATGAGTGAAGTCTGGCTGCCTCTACCTGTGTCCTTTGT  
CTCTG

>chr1\_36852613\_36852813

AATGCCTGGTGCCCACTGAGCTGCTGATAGGGCTGACTAACAAGAGTAATCAGGACAGCTCCCAC  
CGTTGTGCCCACTCTGCATGGAGCACTTGGAGACAGTATTAGGTAGGAGGCTGtttacagctgag  
gaagccagtgctcagagaaggaaattaatgtgcccaaacacacacagctaataatggcagggcta  
ggatt

>chr1\_37943813\_37944013

gggacctgacctattgtggcaggtcaggaaggcttctcagaggcagtgacatctcacaagggtt  
ctgaaggaagagcaggagtttgccagCAGCATTGTTTCTCCCGTTCGCCACCTGTCTCTCATAAC  
ACACTTTGTTCAAACCTCAATTTTGGGAGCTTTGTTCTCCCAAATAAATTCTGGATCTTCTGTTAG  
AGACA

>chr1\_38465213\_38465413

TGCCAGTTCAGAGTAGGTGGGGATGGGGAAGGGGTGCTTCTGGGAAACCAGGAATCCCACATGTT  
TCTTTCTGTATTTAACTCGGGGTAGGAAGAGGTGAGGAAAAAACAGGAAGCAGAAGTTGTTTT  
CTTATCTAGGCCCTAGCAGATCTAGGGGGAGGGGGCTTTTCTGGGTGAGTACTCATTTCTGTG  
CCCAG

>chr1\_53791212\_53791412

aggcAGGAGGGAAAGATGTGCTAGAGACATAGACTCAGTCAGTCTAGTTCTGCCACGCACAAGAC  
ACAAAGCCAACCTTTGGGTTAGGTCTGAAAGTGAACGGGAGGGTGACTGGCAAACAGTCAAAAACC  
AAAACGATTCAACAGAGAGGGTGCCTGTCCAAGTGTCCCGTGACCCTTCCTGTGCAGTGTGGGGC  
TGTGG

>chr1\_150536376\_150536576

GCTGTGCTGAGAGGCCTGGGAAGAGCCCTGTGCTGGGGGAGGAAGGCTAGGTTGGGTCGGCATGT  
TTGTGTGCTGTACTCTTCTGAGCCTTACCTGAATCTCTTGAGATAGCTCCACTGAACTTTGAGTG  
AAGAGGAAAAGAACTGGGGGAAAAGAGGGTGGGATTATAAAAAAAGGAGCAGACTGTACCCCTGG  
GATCC

>chr1\_150541176\_150541376

CAGTGACCTACCTTAGGTGATGCTCTTAAAGAGCAACTTTATTCAAACCAGGCCTGCCAATGCC  
AACTCCTTCAGTCTAGATCCAAAGATGGCTATGATCCTGAGATTGTGTGTTTAGGGTCACCACTT  
TAACATGATACAGGAAGCAATTGAGTCTTTTCTACTTCTTAAACACAGTCCATCCAGTTGTGTGT  
CATTT

>chr1\_156074976\_156075176

TGCTCCTCTGGGGCGGCCTGTGGGCTGGCTTAGGGATAGCAGACAGGGGAATCTGGGGAGTTGG  
ACTAATGTGGatctagaagggaggtggttgggctgcacgatgccttaagactcctcccagctctg  
aagttctacttctaGGCAATGAATGATGAAACGCTGGCCCAAGTGCAGTCCCTTCCCCATCCCAC  
AGGGC

>chr1\_156092576\_156092776

ACGGTGACCTTGGGCTGCCACCTTCTACCCTTCCAGCACCCATACTGGCTCCCCAACCTGCGG  
CTGGGCTGGGAGGAGGTCTTGGCCCTACCAATCCCTTAAGGAAGGGGAAAGAGTTTGGGAAGGG  
GAGTCCCTCCCTTACCCCTGCCTCCCCAAGTTGTGAGAGAGGAAGCCGGAATCCTGCCTGCTGA  
AGCCA



>chr1\_156093376\_156093576  
ACTATCTTCTTAGGCCATCCCTCCCTCCTCCAGGCACTACTTCTTTTGCTCTATCCCCAAGCCCC  
ACCCCTGCATTTTTGTGACAACACCGGAATGATTTCTAGAGAGAGAGGCCAGGAAGAAGGAAAGT  
GGCACTTGGCAGGAGACCTTGCAGGGGGCGGCTGGTGAGGAAGCCAGCCGCCCATTTGTCCAGGAC  
CCCAG

>chr1\_156099776\_156099976  
AGGGCACCCAGACTGGGTCCCTGAGAAAGGAAAGGGTCAATATTGTGCCTGGTCATCCTTGTCTGA  
GGTCCCTCTGAGCTCTAACCAGACTTTCCTTCCCCACAGTCCCACATGTGTAAAAGGGACTAGGA  
GAGGTGACCAGTACCTTTGGGGCTCAGATCGAGAAGTGCTAGGGACATGTGGGCCATGAGCTTAG  
TTGTC

>chr1\_156718176\_156718376  
CCTTTGTATCCAGGCTGTGACTCAAAACAAGTGAGTCAAGGCTAACTGGGTGAGGGTGGGGCCAA  
ATAGTGCTGGGGACCCACGGTACCCCTCCACTAGCCAGCAATAGGGGAACTCGGCTACCTCTT  
AACCATTCCAGATCCAGGCAAGTTACTTATTCTTAGGCCCTGCATTTGCCCGATTCCATCAGACA  
GGCCT

>chr1\_161089176\_161089376  
AGGTATCAGGGAAATAGCGAGGGAGAGGTAGAATCTTTGTTGGACAGTGTCCCTGGGTTGCCAGA  
TATGAGGGTAGAGCCTTGAGAAGTCAGTGAAGAGTTGTCAGTGTCCCTTCCCCCAGGGAATGTG  
GACTCTGGCTGTCCCTTGGGTGGTTTCCATGAGCGTGGCCAAGACTGGGAGCAGACTCAGAAAATC  
TACAA

>chr1\_234747577\_234747777  
TTTTTACAGGCTAACCTTGAATGTCTTTTGGGGATTTCCATAGAAGGTGCGCCTGTTTTAAAGGT  
CTCTGCATCTGTTCCCTGGATCTTGCCCTGCAATTGCAATCCTGCCTCACCTCTCCAAGCTGGGA  
GAATGGGGCCTGTCCAGATCCTTCCCGGGAGTAGCTGGTGCCAGCGGGTTTGGTCACTCCCAGGC  
CCTGC

>chr1\_234859577\_234859777  
GCTTCATAAGGAAGCACGAGCTGGGGCAGTTGGAACCACATCCCTGTGAGTGCTGATTACAGCC  
TACTAAGGAAAATGAGATTTTTATCTCACAGGAATTCAGTTATAAAAATAAAAATACAGCGTCTGG  
CTTGATTCAGCTAAATGTACAAGCACTAGGGTGTTTTTAATTTAACAGAGAAGCTGGACAAGAAG  
AATGA

>chr1\_234859977\_234860177  
CAGTTGGAGGAGAGAGGAGAAAAACAACCTCGGAGCTGTGCTAATCCTGTTTGCTGCCCTGAAGGG  
AATGGAAGGCGGCCAAGGCAGGGAGTTCTGGGAAACCATATAAGGGTGCCAAACAAGCATTGCCG  
CCAACATTAGGAACTGACAGCTTTGTTCTTTGTAACCTTGGCTGCCCGCCAGAGGCCTCATTTAG  
CTCTG

>chr9\_91932380\_91932580  
CTGCTAGAGGCTGTGTAGTGAACCTGAGACCCACCAGGACAGAAATCTGAAAAAACTGGAGCTGCA  
CCTGCCTTACTTGCTTGAATACTTCGTATTCAATGGTAGAGTTAACGTCTGTGCAAGGGACAGA  
GGAAACCTACAATTTGCCTCAACCTAATCCCCATTCTCAAATAGCCTGTTTTGCTGACATTTTC  
TGTTT

>chr9\_131903179\_131903379  
CTGCCCTCCTGGAGGAGAGAGCCTGGGGTGATTCTGAGTGAAGCGAGTGGTCCAAGACAAGGCC  
CCAGGGACCAGAGTGGGCTTTGTCTCTGTTGGGTGCCTCGGGCTCTTGCCTGGCTGTGGTGGAGC  
CTGGGAGAGAAGAGGAGGGGAGGGAGGAGCCTGTTGTCTTGTCTCCTGAACATGGGTGTTTGGAT

GGGCT  
>chr9\_131903579\_131903779  
GAGAGCGTTTCTGGCTTATCTTTTCTCCTTCAAAAAATAACCCAGTCTCCCCTGACACCCGCATG  
TTTCTAGAACCTTCCAAGTCTCTGTTTCTTTGCCAGATTCAGCCTCTTTGCAGAGTCTTCCTTCT  
GCAGCATGGGTCTGGGGTACAGAGCCCTGTTCCCCTGTAAATGCTGCCTATGAGCTGGGGGGCTG  
TGTCG  
>chr9\_131903779\_131903979  
AGGGGAATTATGAACTGCTTGGTTAATAAATACAAATGTGCTGGACTTGCGGTGTCAGGGGGATA  
TGCTCAGGCACACAGGCGTCCCTCTGTGGTTTCTGACGTCATGGGAACTTCATGCTGGCTGCAGA  
ATCTTTCTCTTCCGTCTGGAGGGTCAGACTCTTTGGCAAGAGGGAGGACCAGGAATGGAGCCGT  
CCTTG  
>chr9\_136008579\_136008779  
CCTCAGGGCCTAATCCTGGGGCTCCTCCTTTTCGGAGCCAGGGTGGGCAGGGCTACCCGGGGCAGT  
GGGCACTGAGCTTGCTGGAAAGGCCATCGAGGGACTGCTGACACAGTCAGGCTGCAGGAGGAGCA  
GCACCAGCTGCCACGCAGAAATGCAGGAGTCCCAGGAGGTGGTCTGGCAGGAGGGGAGCAGCA  
GGGCC  
>chr8\_95449024\_95449224  
TGGCTTCACAAGCTTTAGCAAATCAAGCTTTTTCGGATAAAGTAAAATTGGAAGATCTAGCCTTTC  
CTACCATTGTTCTTTTCAAATTAAGTAGGCAGTTTCTGAAACCACCATGCAGCCTTCAGCTCTGC  
TCAGCTCTTTTACAAACAGAAAAAGATCAGGCTTAACTAGGCTAGCCTCATTTAGGCCACGCC  
TACAG  
>chr8\_103800824\_103801024  
gccacttgctaacgggtgtgccctaagggtagttccataacctctctgagcttcgattttgtcttc  
tgtgcaaaatagggctgaagcacctcacaagattatcacagagatACTCTGCTACTGGACTGTCT  
TCCTTCCCTTCTCAGCTCTCTAATGAACGCTCTGGCCCACATTTTGGGTTGAGGCCCTCCAGGCA  
GGCCC  
>chr8\_103801024\_103801224  
ACCCGCTTTGTTCCCTGCCCCTTCCCTCCCTGTTACCTAGAAGGGACCCAAGAGCAGCTCCCAG  
GAAGGCCTGCCCCATCAGAGCTGGCTAGCAAGGGGCTGCGGGGTTGCTGAGAAGACACCACTGC  
ATTCTCACCCAGTGACCTTTCCCAGGGCTCCTAGGGAGTGGGTGCTCACATCTCCCCTTCCCAG  
GGTAC  
>chr8\_103801624\_103801824  
GGAGACATTGCTCAAAGAGAGGCCAGGGCCTTTTCCCAGCCCCGGGGGGCCGCCCTGGAGCCAG  
GCCTCAGAGGTCTCAGCTCTGGAGTCCCTGCCAGCTGCTTCTCCAGAATTTGCTTCTCTGCCTTC  
TCCTACTGGGGTGGAGATGAAGAGTATCtaggatggccagttggagcagataacaatacaggatg  
accag  
>chr13\_99136999\_99137199  
CCTGATCCTTCTGGGGACGTGCAAGCAACAACAGAACATCCAGAGCTCTTACCCAGAGCAAACC  
CCGCCTCAGGACCAAGGCCGCTCCTTCCCTGGAGAGGAAGATGGAGAAATAACACAGCCTTCCCG  
CTTCCCTCCAACCTATTCTGGTAGCAGACGCGCTGGGTGGCAAGGCTACCCAGACACAAGGCTC  
ACCAG  
>chr13\_99137199\_99137399  
AGGGCACTCAGGAAACCAGCTCAAGTCCTTATTGAGGTCACTGCGTCTCAAATACCCGGGCTGGG  
CCTGTGACTCACACACCAGCACCAACAACCAGGGGGTGGGATATTGCATCAGGAAAAGCTCCAAT

CTGGGTGGAACCTGCTTTTCAACCTCATTGGGTGtgtcaccgcccagtggggttcaccttgcccgc  
tgcct

>chr12\_14410733\_14410933

AGAGAAAATCCAGCATGGACTTCGCAGAAAGAACTGGATTTGGCCTGGACTCGCTGGAGCCTAAA  
GCTGCTGCCAGTAGTGGCAAAGTCAGATGAAATATAAGCCTGGAGCGTGGACAGTGGCCTCTTC  
CAGAAAAGAGAAATCACACAGCACTGTCTCTGTGCCATAATCCAGTCCGCATTTTCTGTCTTGCTG  
CTCCT

>chr12\_31901933\_31902133

aatatggtggttcaaaattagtatTTTTcctctttgtaggggaaatcacccaaaagtaacaatca  
gaaCtgttaccacctgactggttcttgcccactgcacagataaaacccaaaactgagccagcag  
gagttgcagcagagaaagagtttgattattgcaaggcaatagagtgaggaggacgggatacattt  
cccag

>chr12\_46776533\_46776733

TTTGTGTGTAAACCATTTGTCACTTCTACATGGATGAGGTCAACGAAATCCTCAAAGTTGCTGTC  
TCAGGAATAAATTTTGTTCGTGGTTGGGAAAACGAAGTGGAGAATGTTATGGGATAGAGAAAATA  
GCTTATTTTCTCAGTGGTTAAGTGGGAGTGGGTAAAACACAATTGGCCTTGCATGTGCTTTGTTT  
AAACG

>chr12\_109085271\_109085471

TTCTGCTGGCAGCAATTGTCAGCCTGCTTAGCACAGACTGGCACGCTCCACAAACCCAGTAAAGA  
GTTAAACGTTCTTTGCACTTGACTCAGTGGCTTCTCTTCACCACACACTCCCAGATCCCACCATT  
CTCTGAGCCACCCGTGCAGCCAATCAAAGCAAAGGAAGGAAATTATCCTGGCCGGCTGACAGCCA  
CAGCG

>chr12\_109085471\_109085671

CTCTGATGGCCATATATGGTAAAAACCACTGTCAGAGCCCTGTCAGGCCTGCGGGCCGGCTGCTG  
TGGACATATCAGTGAACCTGCAGCAGCAGGAGAAGCTGGCCAAGGAAACGCACAAAGGCTGCCTGC  
TCATCTCCAGGGGAGGGGGTGGGGTGGAAACCATCATCTGCCAGGGCACACATTAGTGAGTCAC  
AGCCA

>chr12\_109085671\_109085871

CTCACTGTCATCAAAAATAGCCCCGGGGTACATTGGGAAGTTCCTTCTGCCAGGACTTTGTGCTC  
CATTGTTAACTGGGGGTGAGCAGGGTGGCCACCCACCCCTCCCAGCAAACTGTGGATAACACA  
GTCACTAGGAGAAAATGAAAAGGCCCTTCTGTGGCACTTCATGTGGTAATGAGGCCAGGCCGTGC  
TCGTG

>chr12\_109086071\_109086271

CTCTGAACAAAATCCTCTGCCCCAACACCAAAGCTACCAAGTGCCAAATGTCCACATCTGTACA  
AAGGGCTACCGGCACTGCCACTGTTGTCTAAAACAGAGTACCACAATGTGTAGAAAATGGAAATG  
CCTGTCAGCAATGCACAGTAAGGCAGACATGCAGCCAATGCAAATCCAGCAGGTGCTGGCAAAGA  
CTGTG

>chr12\_109232071\_109232271

CGTGTTTTCCAGAACAGAAGTGGCCCTGTTTCGTGCCAGAGCAGAAGAGAACGATGAAGAGCTC  
TGCTCTCCAGGTCTTCTGGTCTGTGTGTGTCCAGGTTTTGAGGGCCTCTCACATACACGGCTC  
TGGACCACGTAAGATCTAATTTTAGCATTTTCTGCTCGGAGACCACATGTTTGGAAACAGCAGG  
GCTGA

>chr12\_122883847\_122884047

gtcctgttttgggtatcaaatccaatcctgtaagcaaaagGTCAAGGATTCAGAAGTGAAAGGA

AAGACTGTGGCTCTAACTTTGCCAAAGTGAAAAGTACAGACCTCTGCCATCAGTGAAGAAAGAAC  
CCAGATCTGATAAGAGCTTCAAACAGGCTCAGCACCTCCTGGCACACATAGAGCGGCATCACGTT  
GCCCC

>chr12\_122884247\_122884447

CGTCCAGAAACCCAGGTTTCAACGCGGCCCTGCTTCAAGACCCAAAGGAAATTCAGCACCAGGCG  
GGTGAAGTGACTTACCTGTGCACAGCTGCACTCGCAGACTTCGGAGCCCCACCTAATTCATAAA  
TGCTGTATGTCCATGAACCTAATAACAGAAGGTCAGGGGAGAGACGTTCTGAGAGCAACGGAAT  
CTATC

>chr12\_122884447\_122884647

TTAAGATAAAGATGTTTCTGAGGCTGATTTTTCAAGTCAAACCTTGAGAGAGAAATTCAAAGGCTA  
TGTTCTCATATCATATTCCTGGGTTTGGGAGGTTTCATTCACAGCTTAATCCTGTCCCCTGAAGTC  
ACGGTTACGTAAGTATGCTGTGTCACTTGCTGTCCCCACCCCAACACAGGAGATGCAGTGTAAC  
CTGAG

>chr12\_125402847\_125403047

CCTGCGGTATTTTTTTCCTTGTCATGCACTAGTAGAAATATTTGGCtttggttctttggttttt  
gaaacagtatctcgctctgtcatgcagtggatgatcacggctcactctgcagcctggatgttcc  
ggatcaggtgatcctcccacctcagccttctgtgtaggtaggactacaggtatgcgccaccacac  
ctaat

>chr12\_125403047\_125403247

ttttgcattttttgtagagaggagggtttcgcactttgggaggctgaggccggtggatcacctga  
ggtcaggtgttcgagaccaacctgtccaacatgctgaaactccatctctactaaaaatacaaaaa  
ttatcaggtgtgtagctcacgcctgtaatcccagctactccagaggctgaggcaggagaatcac  
ttgag

>chr11\_355600\_355800

accgtctggaaatgctgcccagtggtttcagcctcattttaccagctcccaatcaagatggaa  
ttgctctggttcaaacgcctAGCTtcgccagctaggggtgaaccggccacagatccccggaggc  
caacagaagacagagccccctgggtcagaggcaaggacgggtgacttctcaggcaggagggtggcc  
aagg

>chr11\_46576224\_46576424

TGTAAAGAACAAGGGAGCTAAGTCAAACCTGAAGTCACACAGGGCTGCTGATGAGGAGAAAATGC  
CAGTCAATTGTGTTTTTTCATTCCTCTTTTAAAAAGGAAGAACAAGTTTCCCAATCTGTCCC  
TTAAAGTAAAGCAGACTGAGACAAAGGTTACCAACAATAGTCTTTGTGATACCGTCACACAGTCC  
CCAAA

>chr11\_47290424\_47290624

AGCCCTCGCTAACACTGTGCTGTGTCTGAAGATCATGCTGACCCACAAACGGATGGGCCTGGGG  
GCCACTTTGCACAGGGTTCTCCAGAGCCCTGCCATCCTGCCTCCACCACTTCTGTTTTTCCCA  
CAGGGCCCCAAGAAAATTCCTCCACTGTCACTCTGTGGTATGGCCATAAATGCCTCAGCGCCGCC  
TCACT

>chr11\_57093224\_57093424

TAACTGGGAGAACTTCCTAATCAGATCAGCTCTCATTTCTAGACTCTCAGGTGGCCCATCCGGG  
CAGAGGCGGGTGAACAACCAATGCTCGTCCAGCCGGGAACAGAACAGGATGTACCTCGAGACTTGC  
TTCCCGGCTGGCCAGGAAGGCCCTGCCAGTCTGACCAGAGCAGTAAACACCACCAATAAAAGTG  
GGAGC

>chr11\_57093624\_57093824

GTAAGATGAGGATTTGGATCCTGCATTGCCCTGCCTCCCACCCTATCTCTCCCCAAATTATAAAC  
AGCCATCCTTGGGAAGCAGCAGAGTTAAGACGTCTCCCCACTGCCCTAGTGACATACACACCAAC  
AGGAGAGCATGTTTCAGATGGCACAGAATCCAGGGACTGCATTTTCATGAGGAGAAACTGGTACCAA  
AATAT

>chr11\_62320424\_62320624

TTCAAGCCCAACCAGAACCCAAGTTAAAGCTGGTTAGAGAACAAGAGACATGAGGCTGTCTCCAG  
AGTACCGTCTGGGAGGAAAGAAGGCAAAGAAAGACTGTCCAGGCAGGTGGAAGGGAAAGAAATTG  
GGCAGGGAGAGTGGGGCAGGTGGACACGATGGGTTCATGGCTGGATTTTCAGGCAGAGTTAGGGGTG  
TGGGA

>chr11\_62320624\_62320824

ATGCTGTGGGGCAATAAGAGGAGATGCAGACCTGAGATTAAGGAAAAGAAGCGACAAGACATGAG  
GCTGTGAAGGAAGGAGGGAGGGAGAGAGAGAAAACAGAAGAGCTCAGCACTGAGCTAAGGACTGG  
GCGGGCTGAGTTGTAAACAGGAGCCGAGGGAGGGAGTTGGAGTAAACGGAGCAGCCAACGCCCA  
GCCAG

>chr11\_62323824\_62324024

AAGGATCCAGCAAGCCATGGAGAGCCCAGCGGGGATGGGAAGGGCAAGAGCCCTTGCTGCAGTGA  
CTCAGGCCTCCCTGGGGCAGGGCGGGGACAGAAAGAACTCCAGATGTGCTTCCCCTTTCCTGCC  
TCACATCTGCCGTTAGAAACTTCCACTGTTAACCTCTCCCCTACCCACCACAGCAGAGAAGCCCT  
TGCAT

>chr11\_62650224\_62650424

ATCTGTTTCAATGGAATGAATTTTGCCCGGGTTCAAATTCAAGCTTTTGTACCAAGTAATACATA  
GGAAACACTCAGTGACTTGCATTTGTGATTTCTTATTTTCCCTTAACTCATAGACTGTCTCATG  
ATTGCGTCTTCCCTCCGTTGTTTTAGGCATCCGTGTCAATCTGGACCTTACTCCCAACTACCGGG  
TGAGA

>chr11\_65259224\_65259424

GGGATGTGGGCCACACTTGCATGAGGAAGAATGAATATACgtgtgtgtgtgtgtgtgtgtgtgtgtg  
AGCATGCTCATGGAGGATGTTTAATCAGCTTCATGCTGGGTGTGCCAGGCCAATACAAACATCTG  
CCAGGGACCTGAAGCATGACTGAAAAGATCAGGGACACAAGAACGCGGCTGCGACTCCCTGAGAG  
CTTCA

>chr11\_71751152\_71751352

CCGTCTGGTCCAAGTCCAAAGAGTTTCCTGAGGTTCGGGGCAAACCAGTTTGGTCCATCTAAAGGG  
ACTAGCTTGGGCTGAAGCCTCCTCTTACACAGACCACTCCATCTTTGTAGCCTAGAGTTTGGCA  
CAGAACCCCAAAGCCCTGGAGAGGAACAAGGGAGGGATTACAGAGGAAACCAAGCTTCTCTGGTT  
TCTTC

>chr11\_118783190\_118783390

GCTCCCCACCCGAGTGACGCGAGGGTAGGAGCTAGCAGCCTAAGGGTTGCTAAGGGTTAAAGT  
GGACTTGATCCTAGCTGGGGGAGGGAGCTGAGGAAGGCTCAGATGCCAGAGCCTCCAGGTATGA  
CACACCGGCTCTGCTCCACACACAACCTACCACAGGTAGGGCAGGCCTTACACATCCAGTGGCAA  
CCTGC

>chr10\_74014794\_74014994

GCTTCTCTGCTCTGGGTCTGGGAAGGGGCTTGGCCTCAGAAAGGGGCCAGATGCCCTGGCCTC  
TCACCCAGGCCTGGAAGTTAGCCTGGCCTGCTAGCGGGCAGCCAAAAGAGCCAGCAGAGAACC  
AGGGCACGCTCCCAGGAACACCAGGGCTGGTAGCAAGCCGACCTCCTCCCGGGAGGCTGGGGTT  
TGGCC

>chr10\_103911610\_103911810

TCTTCTGCAGCAGAGGCAGGAGTCTGGAGGCTGGGATGGTATCAGAAAGGGCCTCCCTGGGTATT  
GGAGGCAGTGAAGATGAAGGGCGAGAATCCATTGGCCGTGCCAGTACGCCATGGGGGCGGTTGGG  
AGATCTTGTAGAACAACACTGTTTCGAGCCCGCTTGTCCACTCATTACTCTGGAATCCGAGTCCCAGC  
AGGGG

>chr17\_2299850\_2300050

GCACCCACCACCCGCTCAGCATCCCTGCTGAAAGCCCAGCAGGAAGGCAAGGCCACTCAGGAG  
CTGGCTGCCAACAGGGGAAGGGGAGGCACCTCCATCTCCCGCTTGCCTCGTCCTCTCCCAGGCGC  
CACCATTTCTGGTTCCCTGGCTACGGGGCTGGCCCAGGCCCTTGGAGTCTGCAGACTCCAGGCCAG  
GGAGC

>chr17\_7486676\_7486876

ACCCGGCACCTAAGGAGGCCCTGCCGGTGCAGACTCTCCTGCTCCCACCGGCGCCCTTCCCTCTA  
GAGACGCTGAGAGAACGGGAGCTAGTAGCGCCCCACCAACGCCACCTCGGAGACTCCGGCTCC  
TTCTCTCTCAACTTCGAACAATACAAAGTGTGCTAGGAGAAGACAAGATGGCGCCAGCAGGAGG  
AGCGG

>chr17\_17740475\_17740675

AGTCATTCATTTTATCCAGCCTCGCGCACAAATGGCAGCGCCTCTGGCCGGCTgctgcggaacg  
cgggcaagccgagccccctctctggcctctgtttctccagcaccaagcaaggaagccgagtgga  
agccccaggcctgggccccatcccaaacttcatttctcatttccTAGATTTGACTctttagaaca  
agaca

>chr17\_17744275\_17744475

AGATGACGCTCGTGGTCTCATTCCAGCTTGGGCTCTGTGGTGAGCTGGGCGAGTTCTTTCCAGCC  
CTCTCTGAGCCTCCATGGCCAGCTTTGCCCTGGAGGCTCACACCCATGTGGGCACCTGCAGGCT  
TATCATGAGTCACTGAACACACCCTCTACCAAAGAGCTACTTGAACCCCAAAGATTGCTGCACAG  
TGAGG

>chr17\_27135474\_27135674

ACTGTAAACTACTAAGGGTTAACTGATTGAGAGAAAATTTGCCTAAGCAACCATTCTTTAGGAA  
GAGTTCAGTAACTACCAACAATAAATTCTACATCCTCATCTGAGTGGTAAACAGATTACAGACT  
CCATCAAGTCCTCTACTTTCAGGATTCAGACTCATAGCAAACAACCTCCTCAAAAGATTCAGCTT  
CCAAG

>chr17\_27135674\_27135874

AGTCAAACCTGGGGGAGGGGATTGTGCTTAAACACACAAAATATTGTCTCTGACACCTGACTGA  
AAAAGCTGAAAAGCTAAAAACTACCATCACCCACATCTCCATATGAATGCATCCATTGTTCTAAA  
TAAGTCTCTGACAATTGACAGAGCATTCTCAGAGTCTCCTGTGCCTCTAATATTTTCTCACCTAG  
AGTAA

>chr17\_33390687\_33390887

TCATCTCAGGAACCAAGAGCAGCGGCTTTCATGTGAAGTGAATGGTGCCGCTGGGGATGTATCT  
TTGGTAAGCAAGATTGCAACACAGCAGGGAGTTTACCAGGGCAGTGCTGACTCACGCTGGGCAA  
AATTTGTACTTCCCAAACAACCTCAGCCTGAACCAACCGCAGTCAACTGCAACCTAGGAAAGAAGA  
GGCAG

>chr17\_33390887\_33391087

CTCACTGATTGTTTTTAAATCAAGTGTGATTACTGGGGGCAGGTAAACCTCATTCCCCACTACT  
GGTAACTTGGCCACCTCCAGAGCCCTTACCCAAAAGTTCAGTGGCCAGTTTCTAAAATTTTCAT  
CTGAGAACAGGCTGGGGCTGGGGCCAGCAAGATTACTGAACATAGCAGGTTACAGCTCTGAAGA

TTTCC

>chr17\_33391087\_33391287

CCAGGAGGCTGATAAATAAGTCACTTTGCATTTACAAATTAGAACATCTGGGTGCTGACTCAG  
GGAACCTGCCAGTCATCATTAGCCAGTCAAATCATTAGGGTGAATTTTTGTGCTGACTCTAACCCAG  
GCTCATTGTTCTTTTTTCCCCTAGGCCTCCTCTGACCTCTCTATTTCTTCAGACAACCTCAAGTT  
CTCTC

>chr17\_38270274\_38270474

CTCTTTCCACGACATAGGCATTCCCTTCAAAGAATGTAGGTCATAGAAATGGAATTCTGCCATTC  
TATAAGCCTTAGAGGGGTGGTCAAAGTATTGGCTTTTAACTCTTCCATACTCTTAGCCAGAAGG  
CAAAAAGAATGGTCATTATCTCATTAGGGACAGAATTGCTTAGGGAGGCCCGACACTGTGGCTCA  
ATccg

>chr17\_42172674\_42172874

tgccccgtccccatttctcaacaccgtgccccATGCAAAGCCTCATACTAGAAGAGAACTGAGGC  
ACAGAGGTTGGTTCTAGGACTGACAGTGCCCTTGGTAACCCAGGAGAGGCTGGTGGAGACCTTC  
TGGATATCTCTACCCTCTGTCCCCTTCTGGGGCCTCATCCCTATCTGGGGCAGACTGGGCAGGAG  
GGAGA

>chr17\_57864418\_57864618

CAAAATTAAGCAATTTAAGTGGTCTTGATGGATTCTGTTACAGGATATTTTGGACTATTCGCACA  
GTTAGGTGTCCGTACCAAAGGTCACCTACTTGCACCTTGTTCATCAAGAAAAGGTAGCACTTAGA  
GTAATTCGGAGTTGTGATGTCTAAGCACACTTAGCATGATTTATAGTGGAATTCCTTCGTGCCCC  
CTTTT

>chr17\_57864618\_57864818

ACTTGCTTTCTCTAGAAGCATTTACTTTATTTTGAACCTCTTTGCCACCTCACTCGCAGACTTTA  
ATCTTTCTCCCTTTAATTTCTTCTATTTCTTTAACTCATTCATATTTATCAACAAGGAAAGAT  
AGTTGCAATGTGATGCAAGCTGTTAAATGAATGGCCAGTGGGAACTTGTCTTCTCAACATACAT  
TCCCA

>chr17\_57923218\_57923418

AGGTGCCAACTGTTTGCTCATTCTCTTTGACCCACTAGCCTTGCAGTTTGCTGTGTGGGTGTTGA  
TACTCCTAAATTAAGCAGGGAAGGGGTGGTTTTAGATGGCTTTTAAACACCTGCTCTCCACCCAA  
GCACCCTGGATTCAATTTGATATCTGGATTCTAATTTCTGTAGTCAGGAGACTGGCCCAAACCTGTGG  
CCCAG

>chr17\_57924018\_57924218

GGAGGATCTTTCTGTGAACTTGCTTTGATGACCTCCACCCAAAGCCCTTTGAGGAACAGTTTTGT  
TTATTCAAGGAGCCCTTGGCAGGTCACCTCCCTACCACAAATCTAATCCAAATGCGACATTT  
TCCTTTGAGGCCATCTATCCCTTTTGGGGACAAAACACATCAGCTTTTCCCTTCAGACCCTTT  
TGACT

>chr16\_2202999\_2203199

CCCATGAGCGTGTGGTGAAGAGGGAGGACGGGGAGAAGCTGGCCAAGGTGAGTCAGGGCAGGGGG  
GTGGTGAGGGGTGCCCTGGAGGCTGCGAGCCTAGGCTGTCCCCGCCAGGCCACCACCTGGCTG  
GCAGCAGCTGTTTACAGGAGTATGGACTGCCCTTCATGGAGACCAGCGCCAAGACGGGCCTCAAC  
GTGGA

>chr16\_4665999\_4666199

TATAGCTAGCCTCCTAGCTCTCCTCACTCAATCTCTCATCGCCCACTCGTGGCATGGGTCTTCC  
TAGCCTGGCTCTGGGCCTGCCCCACTGTAGCCCCATGACCCTCTGGACGGCGCCTGGGACAGGCT

GGCGGGGCCAGCAGCCTCTGGTGCTTCGGGGTCCCCCTCCCAGCAGTTCTCCCGCTTCCCACGC  
AAAAT

>chr16\_20877499\_20877699

GCGAGCTGAATTATCTCAAAACAAGGACTGTACCATGTGGAGGGCCTGGTTTCCAGATTTGTGTT  
CCTAAAGACTAGAATGCTGAAAGAAACAAAAGGCCAAACTTACACAAACCCACATGCTCACAG  
ACTGGCAACTCTAATTCCCAGGCACGCTGACTCACCAGGGTTTACTGCTCAGCTCCTGCTGCTGA  
GTGAG

>chr16\_56965299\_56965499

ACGCGTTTTGAGGGGGACTCCAGTGTGAGCAGGACTGTGGCTGACTTGTCAATCATCATTAGGGT  
GATGTCCCAAACGTTCAAGTCTGAGGCCCAGGGAAATTGGCAACAGCTGCCTGGATGCCTCCATC  
CTCCCAGCCCAAGGAAAATCTGGCCTTGCTCCTTCGTTGTCTTTCTTAGGAGCACGTGGAGTTCT  
CCTAG

>chr16\_56965499\_56965699

GTGGGCTTGCACTCGGGGTCGCCAGCCGTTCTTTGAGGGTTCGAGTGGGTAGGCTTCCCCTGTA  
GGACGGGCTTCCCCGTAGGTTTCCACGTGGGGCCACAGAGGCAGGAAAAGGGGAAGTGGGCACTG  
ACACCTGGGGTGAAAAGGGTGGGGGTGCGGCTTTGTGAGGAAAGAATTTGCAGAGACTGCTAAA  
CTGGG

>chr16\_87421699\_87421899

CATGGTGGAACCTCAGCCCGTCCACCTGGTGTACACACTCATTTAGGAAACAGCTGCGGGTCG  
CGTACTGATTTGTGAGTCTTTACCACGCGTTCTACTTTGCAGATTCTTGAAGCTGAACAGGCC  
AGACTTCCCTGGGGAGGAAGACACTGAACATACAGCCTGCTCTAGCTACTTATTCCCTGGATTCT  
CCAGG

>chr16\_87886899\_87887099

GCCGCTGCCTATCTCTCAGAAATTAACCACCCCGCTACAATTCTGTGGATGCCAGAGCGGAGAC  
GGCTACTACACACCAGGAAAGTCTGGTTGAAAATGTCTGAAAGTCAGTGTTTTCGCTGCTATTC  
CTAAAATAAAATACTTGAATTCGGAACTTCCACTCCTCACCCAACTGAAGAGGTGATTCTTC  
ACCTC

>chr16\_87887099\_87887299

TTCCCAGGGCTCCCAGGGACATGGAGATGTTACCAGTCCAGAGCTCTCCAGTCCAACCCTCAGGG  
CTCAGCAGGGTCAGGTGAGTGGGTCTAGGCAGCTCCTTGTCCGCTGCACAGGGCAAGGGGCAGGT  
CCTGGCTTGCCAGTCCCATTTCTTATGGTTGGGGGAGCACGACCATAAAAGAAAAGTGGAGCTC  
GGGA

>chr15\_90943796\_90943996

TAGATGTGGCCATGAAAAACCAGTGTTAATCGGGCAGCTGAGTGTATGGATTGTCCACCAGTCAA  
GGTTGGGGAAAAAATCTGGCTGGGCTAAGTGTGGCCCGTTAGTTTGACCTCATTTGGCATGTATT  
TCTTCTGGTCTTACAGGTCAGAGCAACTGTTTTTATATATTTAATGTCCCTAATGACAAAATAG  
TAAAA

>chr15\_90943996\_90944196

ATACATTTGAGGACCCAAGTTGGCATGTTCTAGGAATTTCATTTTCCGGCTTAGTGTGGTGACCT  
GCCTCTGATTGCTGTACAATTCCTTCTGCTTCACAGTGTACATCTGGGGATAACCAGTTGGTAGT  
GGAACCTGTTTTGGACATTTTTAAGCCTTGTGGTATCTGATGGACTCTTGGTTGTTTCTAGCTGG  
TGCTA

>chr15\_90944196\_90944396

AATAAACCCCTTGACAAGAAGTATTTGTGTAAGAAAGCGCTGGTAGGCAAAGTGAGAACATCCGG



AAGTGATTCATATTACTGTGGTTGTTTGCTTAACTCAGGACTTGGTTGCCTAGAGACCATATCGT  
TGAGTTAGCCGAGTGAAGTGCCAGTGAACCTGGAGGGCCTGTGGCCTACCGGATCAAATCAGGG  
CTCTG

>chr14\_23476760\_23476960

GGGCCCCGAGGATTCCCAGGCAAATCAACAGAGTTTAGTTTTGCTTTGCTTTGGAAGGCCAAGC  
CAACGATATATATGTGCGAGGAATTCTCTCCTTTCTTAGGAAGAAAAGCAAGAACAGTGGATAT  
GACCCCTACGTTTCCTGGATGTAGAAATCAAATAGCCTAGGAAATCAGGGATACGGGCTCTGCACTG  
TTCAG

>chr14\_61569647\_61569847

AGCACAAAGCAAATAGGGCTTGGGTGGGCTCAGGGACAACCTAAAGGGGTTGGATGACTAACTCCC  
TTTTCTGTGACCATCCCTGCCTCTTGTTTACTCCACTGAAAAAGGGCGTAGGGAGGTGAGTTGCC  
GCTGCTGATCTGCACAAAGGTCAAAGGCAGAGCCACCGAAAGTAGTCTGCTCCTGTTTTTGAAGC  
TTTCT

>chr14\_74208647\_74208847

TTGGACAAGAAGTGCAGAGCTGCGGGCTGCAGAAACAACCTTTCTCTTGCTTTTAAACCCGCATT  
CCCTGACAGCCAACCTAATTCAGAGCAGGAACCCAAAAGCTAAACCCTGCACTGAAAATCACCCCT  
GGGCACCCCATGAAGCTGCAGGGTGGGACTGTCTGGCTCCGCCTCTCCGAGGGAACATCAAGCC  
CACAG

>chr14\_77422247\_77422447

ATTCATGCTGAGACCTGGGCCAGCCATGCAAAGAAGGGGGGTGTAGGCAGAAGTGCCGCAGTGGG  
AACAGGCTAGAAGTTGGGCCTGGTGctgggacagtcccagttcagggcatgtcctcctggtgtcgt  
ttttaatagctcatcctttcacaatcaagagtggctcatgccggagatgagtttaCCCGCAATGAG  
GGGCT

>chr14\_77422447\_77422647

GGAtttattctaagggcagaggggaagccatcacaggaaatgatgtgattgatgttttgaaaagaa  
ctcgtggtggttccgtgaagaataaattagaggggcaggaggggaagaagtctgcctggggcggc  
tgcagcaaccagcgtgctgaggtgcccctttgactagattccagtgggggCTTTCGGGCGAG  
CAGAA

>chr14\_105147555\_105147755

AAAGCAGGGGTAGGGAAGGGCCCTCCCAGCGCCCCACTGTAATAGGGGCCTCATCAATGCCCCAT  
GCTCACTGAATAAAGCACTGCCAGCGAAAGGTGAAAAGAGGAACAAAGAACATTCTCCTGGACGC  
CACCCACAGAAAGCCACGTGCAGGCTTGGCCCTCACCTTGGGGACCTTGGACACGGAGCTGGTTA  
TGTCAT

>chr14\_105147755\_105147955

CATCTGGCTCTCAGAGCTGGGGCAGCGTCTAGGAGGCCTGATGTAGAAAGCACTCAGCTAAGCCC  
TAGTTACCGGCACACGGGCACCAGCGCCCCCTCTCAGCAAATCCACGTCTTATGAAATTAGCAC  
TGGATTTCCACTTCAATTGGAAAATATGGCCAAGGTAAGAGATCAGGAACGACAAGGCCAAGCTG  
GGGTA

>chr19\_4375400\_4375600

TCAGGGCAGGTGGAAGGGGAGGGGCAACGCCCCAGGGCTGGGGCAGGAATCTGGGAGCAGGTGGG  
AAGCTCATGCTACCTTCCCAGGAGACGGGAGGACAGGCCCTGCCAACCAGGGGGCTCAGCTATGTG  
GGACACACGCTCCCACCCTTGCCCTTGACAGGGTTTCATCCAAACATGGAGATGCCAGTGAGTG  
CCTGG

>chr19\_4376200\_4376400

TCCCTTCCATTTCTGAAGGACTTCCATTTCTTTGTGACTGTGGGCCACCATGGGCATGAGTCACC  
TGTCACCAGAGCCTGGTGTCCCTGTGCAGCTGTGCCAGGTGGGCAGAGGAGACAGGTGAAGGCAC  
ATTCTCAGCGCCCGCTCACAGCTCTGCCACCGTGCATTCTGTAGAGAACCTCAGCGCCCTCCT  
CCCTG

>chr19\_13275600\_13275800

AATTAACGTGTGTGTTAATTGAGGCTTTTGTGAGTGTACTTAGGAGGGGTGAGGTGAATCACACC  
TTTTCTCACTTGATGGAGTTACAGGGCTTTCTCCTCTATTGCTGAGGGCTGTGCAGTCAGGGACG  
GGGCAGGGCTAGCCTGGGAGAAGCCTGTGCACTGAGCTCAGAGACGTTCAaggcttttccccaga  
taggt

>chr19\_18393400\_18393600

CCAACTCCAGGGGCTGGGCTGATGAGGCAGGAATGCCGGGTATAATTATTACATGCTTGTTACCA  
CTATCATGGCTGTTAGGGCTTAATGAGCCACTATTAAGACTGGCTGGGAAGGGGGTGTGAGGGAG  
GAGAGATGGACCCACCCACCAATACTACAAGGGATCCTTAGGACATCTGGATCTGACCTACAG  
CCTCT

>chr19\_18476200\_18476400

ggagtacagtagtgtgatcatggatcactgcagcctctacctcctgggctcaagtgatcctccca  
tctcagcctcctgagtagctgggactacagggatgcaccaccacacctggctaatttttaaattt  
tttatacagacagggtttcacatggtgccagggctggtctcgaactcctggactcaaactgatc  
ctcct

>chr19\_18485000\_18485200

CCAGCTGAGGATGACGATTTGGGATGTTAGGTACCCAGGTGCTGTgctgtgtaactcaggcaca  
gagctgccctggtccgagcctcagtttaccctgtgactcagagcagatctccataccccatca  
cagggctgtgatccgagctcagccagagcctggcatgcagtaggtgcttcataaatACACACTG  
TGGAC

>chr19\_34662760\_34662960

ACAGAAACCTGgttcacggaattgatccaagctacatactgataattgggattagtgagttaca  
atggcggttgaagccatgaaactgggttcagaccggctgaatgagcgggacaggaaggggctgaaa  
cacttgagtcctTGTGAGAGCCCCAGCTCCAGGGGCAGCCTCGGGGGAAGCTCCCCGGGCGATGA  
CTGCG

>chr19\_39155960\_39156160

ccttctttgaaaaggggcatcatcctatcctcagtttgaggattagacgtgatagtgcgaggaa  
gcactctggtgcctggtacattgtaagtgtcaataaatgcagctTCCAAAATGATTTCAATGG  
CACATGGTCTGCATCCAGGTGGGATCTGCTACTTGAGTCTCCCCCTCAAAGGGGCCTGCTGAAA  
TACGC

>chr19\_39156560\_39156760

CAGGCTGCCCTCTCTTCAGTTGGTGTGTGATGTAGAAGCAGGAAGGGCTTCCCCTGATAACCCT  
AAAAATAACTGCCAGAAATGCTGTGATGGGGCCAAGAGGTGCACAGGAGCCTGTGCCAGCT  
GCCGACCTGGAACGTGGGACTTCTAGAGGGCTTGAGGAGCCCTGCCCTTCCAGGCCTCTTCC  
CAACA

>chr19\_39157160\_39157360

GCATCTCCAGTTGTGGGATCCACGTGCCAGGAGAACACGAAGTACACACAGGTCCGCAGTGGGAG  
CCCCTCGGAGACACCTCCCCGCCATCACGGCTGGGACTGTGCATATCCAAACACTTCTTGCCCTC  
TGAGATGAGCAGTTTTCTTCCCCTTGACTGTGCCAGGGTTCAATTAGCCTGGGCATTAATTA  
CTTGT

>chr19\_39174160\_39174360  
CCATTTGGCCCACAGGCCACCAACTTTTCCCCCCTTCTCTAAAAGACACACAATGGCAGTTGGG  
CTGCACCTTTGTGAGTCACCGGTGATAGCCCATATAAATTGTTATTTTCCATATTTCCAGAGCA  
GCTTTATCGGGCGTTGCTGTGCAGTCCGGGAACCGATTGGTATGGGGTCAGTTAACATGCTGT  
CTTGT

>chr19\_39174560\_39174760  
CAAGGACCTCCTGGGACTGCCCTTGGTTTTGTGTCTTCCCTTAGAGTAGATCAAATGAGAGGAACC  
ATGTGAAGTAGCTCACACAGGGCCTAACAGAGCAAACACAAGACGTGGAAAGCAGACTTGGTGAG  
GCTTGAGTTTAGTTTGGGGGTGCGGgggtcccagctctgctgcttaacagccctgtggccatgg  
gtata

>chr19\_39175160\_39175360  
TGTCCTTTGACGTCATACCCACACCGCTCCTGGAGACAGCCACCCCTTCATGCCAGCCCCAGGAA  
GGCTTGATAGGTGGGGCGAGCCAGGGTGAGAGTGTAGCCCTGTTCCCTCGGCCAGGGCAGATGTTTC  
ACCATTTTTAATGGAGCAATTATGAGTCAGAGGTTTTCAGTCTCTACTGGTTCCCTCCCGATCCTAT  
AATTA

>chr19\_39176160\_39176360  
CACCCAACCTCTGGATCGAGGGGACTCAATTATGCGGATAAAGGCCCTAATCCTCTCAGTGCTC  
CAAACCTCACTCTGCTTCTGAAAAGGGATCTTCGTACCCTGGGTTTCAGAGAGTAGGAAGCCCGCAGG  
GACCGAGTATGCATGAAACAAGCCCAAGTCTGTGGGGCTGTACATGGTCAAGATCACAGATTTTC  
CAGAC

>chr19\_39176360\_39176560  
CAAGCCAGCTCCACCCTAGCTGGGATGCCACCCTGAGACACCCCTCTCTGCTTTCACTGGAATA  
GGATGGCCCTGACTTGGCCGGGTGGACTGTTGAATCAGAGCCTCTCAAAACAGGAAAAAGGAAAA  
GGATCACCAAGCAGGAGTTTTCAGTTGTCAAAGACAAAACCTTACCACGATTAAAGATTACTCCA  
GGCC

>chr19\_39176760\_39176960  
CGGGTGTGTAGCACTTGCCTAAATAACAATCCCATCAGTGCCCTGTCTGACCTTTTCTCCCCAAA  
TGCCAAAGGCCTCTGTCTGGATGAACAAATCCCTGGGCGGATTTGTCCAGACTAAAACGTTAAT  
TCTAAAGACTGGGCCCTTAGGCACTCGCTAAGATTCCAGGCCACACTGTCTCAAGGCCAGAATT  
GGCTT

>chr19\_39892760\_39892960  
CACAGGGGAGGGCAGTCATTCCCTCACCCAGGCACCTGCGCGGAGTTACACACACTTAGTCACTG  
CAGATCCCACAGTGGCTCAGAGCTACGCACAGATATGCAGGTGGGGATGAAAATCTCATGTTCTT  
AAGAATGCCGCTCAGAGACAAATTGCAGTACAGTTACAACAGAGCATCCACCCACACCCAGAG  
ATGGC

>chr19\_39892960\_39893160  
CAAAGTACACACGGTACAGTCGATCACACAGGCGGTTTTCACACATTGATTCACACAGCCAAGTCA  
TGCGGGATTGTATGCACACAGCCTTCTCACAGGAACTGGGCACACTCGTGTCCCTCACGTTCCC  
CCACTGCATACCCAGGCACACAGGCTCTCGCAGCCCCAGATGCCAAGGCGCACACCTTTGCACCC  
GCAAG

>chr19\_47611960\_47612160  
AAACCACAGCAGTGGCTTACTAAAATAGCTGGCTCTACTTAGAGAAAATATGGCTTATAAAGAA  
ATCAAAAATTTAAACCTTCAGAGCAGAGCAAATTTGTACCTGGGGGAGAGGACAGGCCATGAATT  
AGTCATTTTGGGGAACCGCATTTTTTTCTTTTAAAGAGCAAATTTGAGGGGAATTAATAAATAA

AGGAG

>chr18\_3596600\_3596800

ggaagaattacaagatcaggcactgctgtctgtctgttccacggatgtaaccacagcacacgcgt  
ggctcacggtactagtgtgataaatgcttgttacatgaaGGCGTGAACAGGGATGAGAAGAGACT  
TCCTGGAGAAACAAAAGGACTAACAATCAGGAAGGGGAGGTGATCGGGGCAGGAGTAAAGTGGAC  
ACCTC

>chr18\_3603200\_3603400

CTTGTACCCTCAGGCACCTGGCTGCGAAGTAATAAAAACGGTTGCCTTATCATCTAAAGGTGGAG  
TGAGTCAAACCTCAGCCCAGGGTAATTATAGTAAACTGAAATTGCCTGTCCTTTACAAAAAAAAA  
GGCGGAGGGAGAGAGAAAGGAAAAGGGCTTAAGGCAGGAAATTGTGTTTGTCTTTCTCCTTGGAT  
TTAAA

>chr18\_20840002\_20840202

GGTAAGAGACAGGAAGCAGACAAGCCAAGAGGTTGCTGCAGCTGCCCCAGGAGGAAACGGGCAG  
CAGGGAGTGTGGCCAGCCCCACTGTACCCCTCCAGGGGCCGAGCCCTTGCCAGCCCAATGAC  
ACCTTGAAGTCACCACTTTTCTTTCTTGCCCGCTAATAAAAACCTATTTAAACAGGAAATTCATA  
CCAAA

>chr22\_30592000\_30592200

AAACAACAGAGAGACTGCCCTTTCTGTAAACTCACCGAATGTCAAATATTGTTCACTCGCATGG  
CATTGGCTTACTAAGCCACTACAGAGCCACTTCCCTCACGTAATCCCCTCAATCCAAAGGCACTT  
CAACTTGAAGAGGATCAACTGAAATAATACACATTTCTCTGATGATTGGACAAGAGGCAGCCGA  
TGGAA

>chr20\_30160139\_30160339

tcgttgtaacaacacttttgaggtacctacatcattcttacgatggggaaactgagggcagagaccg  
taaggggcgggcccagggGGCATGTGAACCCAGAGTGTCTGGCTTCCAAGACTCGTATTCACCGTG  
GTGCCGTTTGACATGATCAGGATAATGGATCCCTGGTTCCCTTTTGGGGCAGCATTGGAGAAGGG  
GGTTT

>chr20\_30307139\_30307339

ACTCTACCCTTAAGGATCTCCAGCCGCAGTCTCCAGGATAATTACCCGATGCCACCACAGTAG  
CCAGTCGGTGCAGCTTGGAACAGGATAATACCTGAGAGGAAGGGGGCGGGTACCTTCTACCCAGG  
CTCAAAGGATCCTGAGTCAAATGTTCTTTACTCCCTGGCCTTAGGGAGAGAATGTGTGCTCAGAA  
ATGGT

>chr20\_30307739\_30307939

GTCCCTCCTGTAATCAGCTGAACAAATATTTGCCCAAAAAGAGAATCAAAGCAGGAGGGAACAGG  
AGAGGTCACTGCACAAACCAACAGGAACATTTAATCATTTATCCCCCTAGAGAGTTCATTTACA  
GAATGGCTTTCAAGTCTAGTCAGCTAGCTCAAGAGAACCACCCACCTTTACCTCCCCTGACCCCA  
CCCCA

>chr20\_45978193\_45978393

ATACAACGGTGATTTATTGAAGGTTATTTTCAGCACTAATGCTTTCTATTCCAACCTAAGGAGAAA  
ACATTCTCAACTCAGAAACACTCTGCCTGAAACATACACAGGTTGTCCAACCTGGATGCTGTTGAT  
GGGTTCTGGCTTGGGGTGACTGGAAATACATCTTAACAAAAGCCCCATGCAGCCCTCGGAGATG  
GGTAG

>chr20\_45987993\_45988193

CACTTGATCACTTCAAATGTTTTCTGGGGCAAAGAGCAGGAAGCTGCTGGCTTATTCTGGCAGCT  
CTGCTCTGTTTGGAGGAATGCTGTTGGCATTCCGGGTAGGTCTGAGGTTATCTGGAAAACAGCAATT

CGGCTGGGGACAGACACAAAAGTATGGTGGCAGATGGAATCCTGGGAGGAACACAGATTGAAAAG  
AAAGC

>chr20\_48782993\_48783193

aggaccacattttgcttggtttgttcatgtgatcgatgatgatggacacttaggttgtttccactt  
tttagctatcgtaaacactggttgctaataatgggaatggtgtacaaatatttcttcaagatcttgc  
tttcaattcttttgggtatataccagaagtggaaactgctgcatcatatggttaatttctgtgttt  
aattt

>chr20\_49434993\_49435193

tctctctctctcactcAACCCCAAGTGTTCCTGAGGCGGCCATCTTGATCTCGTCCTTCCCTCG  
AGATGGTTTTTTATTCCGCAGAGGAGCCAGGAGTGGACCACAAGGTGGCACTCTCGGGCACCGATG  
CAGGGAGCCGTTACGCGGGGACGCTAGACTATATTTAACTTTCCTCAGCTCTGCACCGTCCCCTG  
TGCAA

>chr21\_35319730\_35319930

CTTTTTTCTTATCTTACGTGCGAGTGTACTTTGTCTCTTGTAACCTCCTGCAGGATTTTTCTTAA  
AGCCTTACATGGTGCTGTTATCACGTGGCACAAAATGAAGCCGACCTCTTTGTGTGTGGGAATAG  
AGGGAGCATTACACTGCTGGGATGCAACAGATGGAGGGTGGAAAGCTGTCCAGCACCTTGTCTCT  
TCCAA

>chr21\_35320530\_35320730

TCTGCAAGCCAGCGAGGCTGCTGGATTTTCTCGAAGGGTATTGAGTTGCTAAGCAACAGCACTGG  
CGGCGCCTATCATGCCAGCGATGTCAATGCCTGAGTGTGGCCTGCAGAGCACATTTGCTCCCCT  
CCCCCTCGCCTCCTCTCGACCCCTTCCCCCCTACTACATGAGAACATTAATTTGCATCTCAGGGAC  
AGGAG

>chr21\_35320930\_35321130

CTTGAAGTGTTTTTTCTGTCTGCCATCCAGCATCTTATTTATGCCCCATTCTGTCCCTCTCT  
CTCGTTGCCTTTGTTCTGTGGTCTCCTGGGTGATGGAGTTATTGTTTGTGTGTAGGGATGTGTGG  
ATAAAAAGGGAGCTGATTTCTAGAGGTGAGATGGCCCTGTGGTTAACGGTTGGAGGCTGCTGTTGA  
CAAGG

>chr7\_44679275\_44679475

GGGCTTGCTGTTGTTGGGTGTGGGGCTCACCCAGTCCTGGAGACAGAATGGGCTCTTTGTCTGA  
AGGTGGGGCAGGGTGTCCCCAGTGGTGTGGGAACTGAGCCAAGTGGAGAGTGAAGTGGGATGC  
ATGGTGTAAAGATGAATAAGGGAAAGGCTGCAGAAGTTGCATTTCCAGCATTTTCTTCCCGGGGA  
TTCCC

>chr7\_100143264\_100143464

CTGGTTAGAAATACCAGAATGAATTTGCTGTGATTACCTCTTTTGGGAGGAACCTGAGAGTTATG  
TTGGGGAGCTGGGTGCAAGTGGGAGAGCTGGGCCTGTTTAAATCCAGGCCAGTGAATCACATCTG  
GTCCGCTGCATGACCCTGGTGTGTACCCAGTGAATGCAGCACACCTAGGCCACATGGTTTTAGC  
TACCA

>chr6\_7147201\_7147401

TCTTAACATCACATGCATTTTGTAGTTTATGGTCTCCAGTCTCCAGCTGTTTTTGGAGCACCTTC  
TAACTTTGAGAGGGTGGAGCTCTAGCCTGTAATAATGGACTGTGGGTGGCTCGTGGAGAAGGTGCC  
TGGTGTGCTTTTCTGTGTCTCTCTGGATTCTCCCTGAGCTGTCCACCTCTGAAGCCTGCTTAC  
CTTCA

>chr6\_26025621\_26025821

AGCAAAGTATAGAATTTGGAGAGGTGGTTAGGCATCCCGGAATGAGAAacagcccgaagctgc

cactatcacaggctttggcattgctagaagttaacgtggcacttacagctaggccgtggtgttct  
gttgaacaaactatattgacagagcaCAGAGCATGTAAGTGGTGAGGCCAGTTGAGTTAGCCAAGA  
AAAGA

>chr6\_29932221\_29932421

gaaaaagacgggaataattagaagggcagccataatcatttgggagagacagcagcatcctcctg  
ggtaaggagtcctgccagctaagcagaaattcccaaatgcagatcctggatgggataataatgac  
cccagggatcgggtccaaatgcaagaccatagggagctaataattagagggattatgcagtccac  
tcata

>chr6\_30582221\_30582421

GAACTAATCAAGTGCAGAACGTGATACAGCACTGAATACAGTTTATCCCCAAACTGAGAGGTGGG  
AATGAGGGCGATTTAGAAGAAAAGTCCTAAAAGTACCCACCTTCCCCGATTCTCATTACACAAAG  
CGACCAAATGCAGGAGGCCCACTGGTTCCTAAGCAGAAATGGCACACTTCAGTGTCAATTAGGCC  
GTTTA

>chr6\_33558022\_33558222

CAGGGTGTGGGTGGAGCCTGGAGAGGGCTGAAGGCTTTCTCCTGGACTTCCTGGCCAGAGCCCAT  
GGTGTCTTGACTCAGACCCGAGCTGGGGCCGGGTGGAAGGGCCCATCTGGACTGCCCCCTGA  
GTCAGCCAGGAGGCAGCCTTGTGACCAGATGACTCACCTGTGCCCTAATTGCCCTGTTAATCATT  
TCCTC

>chr6\_34625022\_34625222

CTGCAAAATATGTTTTGGAGGGAAGAACTATTTGTGCACTCAGGACAATTGCCAATTCTCATCC  
CCAGCTTGTGTCATATTTACCCTTTGGCTCTGCCATCAGGATAGGACTTTAAGACCACTGCAGT  
AGGAACACTAGTAAGTGGGAAAGTCAAGCTACCCAACCTTAGGCAGATCCATTCTATCCTCAAAT  
CTCCT

>chr6\_34625622\_34625822

CAACAAGTAATTCTTCATGAAATGGAGCTGGCTAAGGTGATGGGAAAGGGAAAACATTGACCCAG  
CATTCACTGCAGTCTGAAAGTTTAAACCTCCAGATTCCTTCAGTTTTTCTGCTCAAAAAAGTTTT  
AAATCTAATTTAGATGGTTAAAAGTACCCTGAAGAACAACAGAGGCAACGTTAACAGTGATAA  
AAAGC

>chr6\_44205022\_44205222

GAGGTCAGGTTGGCAGTGTCCCCCAAACCTTGGGGACCAACTGTTTCCTGGGGCAGGTTGGCA  
CTGAGGGTGGAAATGGGCAGCGCCAACTCCCTCTGGCCCAACCTCATCAATGGCCTTATGTCC  
GGGCTGGACCCCTCCAGCCCATCTCGGTATGACCTGGCTTCCTGTGTAGATGCTCTCGGGGAGAG  
GACGT

>chr6\_74289279\_74289479

GGGGATTTGCCAGAGGCGGTGCCTCCCTTCCCCAGCAGGGCATGTGCTCCAGATCTTGTGCCACT  
TGACATGCAGAGCCTGGGTGCAACCTGCAGAAACCATGTGGGCTGTGCCCCAGCCTTGGGGTGGG  
TGTGGACCTGGTCTCCCTGGGGATACTGGAAGGGCCTCTGGGAGATATTTAGGGCGCAGCCTGGA  
CATCT

>chr5\_180669194\_180669394

AGGGTTCCATCCCAGGAGCCTGAGAGGGCAAACCTGGCCATCTGAGGAGATAACCACATCACTAAC  
AAAGTGGGAGTGACCCCGCAGAGCACGCTGTGGAATTCCATAGTTGGTCTCATCCCTGGTCAGTT  
TCCACATGATGATGGTCTTATCTAAAGGAGGTAAAACAGAAGAAAATCAGTGAGGAACCCGCAG  
CCCGT

>chr3\_39192196\_39192396

AGGCTCAGATACGCACTGCGGCTCTGCCTAAGGGATCGCCACAGAAAGAGAACTTAAGGTGAGGA  
GGTTATGACCTCCAAGCCTACAGACAGGGAACAGAGACACAGGGAAGCTACGGTCATGCTGCAG  
GTTCTAGTGATGAACAATCCCCCTCAAATCTGCAGAGCGGGAATGAAATGAGAAATTACCTCCTC  
CCTGA

>chr3\_53303960\_53304160

CCACTGTCCCCCTTTGGTTGGATGTTTGAATACTTCTGCTTTTATACTGCAACAAACAATACTT  
GTGCTTTCCCTCCATCTAGCACTGTGCCTCCAGGAGAGAGGGTTTTTTTTCTGGTCGCCCTGCAG  
ACATGACCCTGCTTGTCCCTGGCCAATCCAGGGCCAGACTGGATTGTTGGCCCTCTGACTCACC  
CTAGA

>chr3\_69101910\_69102110

AAAGCACAACCTCTCTCTCAAAATAGTAGTAAACTCATTGCTGCAGTCAAAATACCCCTAAtact  
gtggtctgtcgggtgtcccctgcacaaattcctatggtgaaacctaactctccaatgggacagtatt  
aaggggagccttttaggatgattagatgatgatggagccctcataaatgggggttagtgccctta  
taaga

>chr3\_133291510\_133291710

TCAAGGCCCAAGGGTATTTAAATGGGCTTTAAACCCATTTAAACCTGGCTTTTCGCCTGGGCATT  
TTGGTCTCCACCCCTATGATAAGACAGTCCCCTCCTTTTATCAGGGATAGAAGCTAAGGATAAAC  
TGTATCATCATCTAGACTCAAGTCAGGGCGTTAAGCAATGTGCTGAGCAGCTAATAATGTTGACT  
CTCTT

>chr2\_26981296\_26981496

TGGCAGGGACGTGGAGCCTCACTGTAGGTCACACCCTGGCGTGAAGGGCTGATCAGccaccccat  
gggtgtccacatggttgtctctgcctggggtgaccctgctttctgcacctggagcaatcctgctcc  
tccttcaagtccctactcaggtctctctGAATTCCAGTTCTACAGGGCTACTGTGAAAACCAAG  
GCCAC

>chr2\_70313096\_70313296

ACTGTGGGGACCCAAATTATCCCTTGATACTGCCCCCTATTATCCACTATTAAGCTTTAAAAAG  
GCGAGAGATTAAATATTGTGCCACATTTTACAGTCATTCGCGTTCCCGTTTCAAATTAAGGGA  
GAAAAACGCGTTAAATTAGGCCTCCGACCTTCAGACCAGCCTGTGGGCTTTTTTAAAGTCATAAA  
ACTCG

>chr2\_87784885\_87785085

CTAACAAATTTATTTATCATGACAGGAAAGGAAAGCATAGCTTTGTGCACCCCATCCCACACCCT  
CCACCCCTACAAATTTTACTAACACTGTTTCTGGGTTTCAAGATTTTTTTGCCTGAGTTGGTACC  
TCAAATCACTTGAGTTAAACTGCAAATGAATCACACATAATGCAGATAAAATGACTTCATGCCCT  
AATTT

>chr2\_112222129\_112222329

GAGAGTGGACAGACAGCCTCGGGCCCCTTCAATCCTCGCTACACATGTCAAGAATACCTGGGTCT  
CATGGGGTTTAGGAAAACGAATGTCTAGTTCACATTCAGGTCACGTTCTAGAAATTAGGGCATGA  
AGTCATTTTATCTGCATTATGTGTGATTCAATTTGCAGTTTAACTCAAGTGATTTGAGGTACCAAC  
TCAGG

>chr2\_202022755\_202022955

GCTTTAGCCATTTTTCTTCTGTTCTTTTAGGTAAGGATTTTCTGCCCCAGACCTCAGATTCCCAT  
TTCTTCTCCTAGCTTCTCTGCTGTTATAGCTCAGTCTCTTCCAAGACCATGCAAGATTCAGACCCT  
AGTAGGaggagatggaggaactaggacttaaaccacatcttgtgattccaaggctggttctctct  
tttgc

>chr2\_216980155\_216980355  
GGATGCTTGTCTAGGCGGCAGATACCTGCCAGCCAGTATGCTACGCATGCTTGAATCCAGCAGC  
AGGCACCCAGACACCGTTAGTCCATGTACAACCTGGGAATTGTTGTGTTGTTTACAGACTAAAGGA  
TTAAACAGACCCTACAAAAATGAAGAATGACAGAATTCCATTATCTCTCCATACAGCACTCTTCC  
CCATC

>chr2\_219270356\_219270556  
CCCCTGCTGGCTGGGGGCAGCTCCAGGATATCCTGCCTTCCAACCTGTTTCTGAAGCCCCTCTC  
CTAACATGGCGATTCCGGAGGTCAAGGCCTTGGGCTCTCCCAGGGTCTAACGGTTAAGGGGACC  
CACATACCAGTGCCAAGGGGGATGTCAAGTGGTGTGTCGTTGTGCTCCCCTCCCCAGAGCGGG  
TGGGC

>chr1\_8772413\_8772613  
TAACTTCTAACGTTTACATCATCTGATTAATTCCAACAATAAAATCTAAACACTGATCATCCCCT  
CCAATCTTCAGAGCAAGCTGACTCTACAGTGAAGAATACGAGAGCCCTATCAGCTGACTCTGGTA  
TGTTTAAACGATTATAATGTAAAGCATGTTTCATTCTCTTAAGTGAAGGAAATGACTGCCAAATG  
CTTCC

>chr1\_8772613\_8772813  
TTCACAATCTCTCCAGAATAGGGCAGGTCCTTTAATGTGAGATTTTCCTGACATTCCAATTGTAG  
CAGACATTGAACAAACAGAGACGCATTAAGGCGACCTGGTTCATTATCTTTTATTGAAGGCC  
TAGCAAAGATCAGACATGAGCCCTGTGCTATTTACATTTTTTGGTGCATTAATCACTTTTATACT  
CAAGG

>chr1\_23881813\_23882013  
gacatgaatttgaattctggctttgttacttagaagccgtgtggccaccggaagttacttcgcc  
tgttctgagctagttcatttataaaataaagacaCCTCCCAAATGTCTGTATTTACAGCCGATG  
CGATCAGCTCTGAATCCGATCGCATGCGACAATTTGCACAAGACACTCAGCAGTGAATCTTGATG  
TTAAG

>chr1\_23882613\_23882813  
ATTAGCTTAATAATACCTCGTAGGTGTGTGATGCATTTCAAAGAACTTTCCCACCATTATCTTCT  
GTCTGGGAGGCAGCAGGGCACAGAAGGAGCATggctcagagaggtggaatgcttgctcaaggctc  
actcggcAGATGACCACCGCAGCCCTTTTTAGCCTTCCACGGTACTGAAACTTCCGAGCAAACGG  
GAGGC

>chr1\_27113413\_27113613  
AGAGATACAGTCCCAGGCCCCACAGACTGATGTGGGCTGGTCTTCGCCTGGAGAGGTAGCAACC  
ATCTCTTTGTTCCCACCCACATGAGTAGCCGTTGCAGAAGATAAACCCCTCCCTGAGCCAGGCTG  
TGGCCAGAGGCTAACCCGGCCCCCTGGCTTCGTTTGGAGGGCAGATAACTGAAACCACATAAGGCT  
TTGGA

>chr1\_36839013\_36839213  
ctattattgaaaaagcaaagcctaagaCTGTGGCCCAGGTTGAGGCTCTGGTGAGGGCTTTTCC  
ACTGAGTCTGAATGACAGCCATCCCTGAAGAAGGCATGCACCCTCTCCCCGGGAGCTTGGTGGCT  
ATGAGCAATCTCCTTAGGAACCCATTGGAAGCCATTTGCTTTGTGCTCAGGACAGATGCTGACAG  
GCTGG

>chr1\_36852813\_36853013  
caaatcaagtctgatggattccaaaaacttggctttgaatccctgctgcatcacttacaagctg  
ggtgactatgtgcaattgcccatttccccttctgtccaaacagggataacgcttgggggatc  
actgtgaggactCGGAGTTATAGAAACAGCTTTTTGCAAGACCAGCGAGCACTCATACTCATCT





tctcgctctgttggccaggctagaatgcagtgggcgcatcttggtcactgcaaactccgcctcc  
tgggt

>chr1\_156095976\_156096176

CCTGTGTGCTGCCTGGCAATGGGGAACCTCTGAGGGCTGGTGAGCAGGGCTGCTGAGGAGTGGGTC  
TAAGGAGTCCCTGCAGGGCTGGGCCAGCTCCTCCACCTCCCCTTTGTCTTCCCCTCCCACCTTGTT  
ATTTTGTAGCTACAGTGTCTGTCCCTCTTGCTTCTCCCCAGATTGGGAGAGGAAACGGAGGCCTC  
TCCCT

>chr1\_156099576\_156099776

CGACTGGTTATAGCTAAAGCTTTACCCACTTTGAGGAGCAGGGAGGCTTAAAGCTGGGGCCCAGA  
TGGACCTGGAGGCCTGGGATCCACATCTGGAACCAGATGCTGAGGCTATGGTAGATGGGTAGGGC  
TCAGCCTTCTCCCAGGGCACGGATGAGGCAGGAGGGAGGGAGGCAGGGACCCCTCTGTTCAGTGC  
AGATC

>chr1\_156717776\_156717976

GAATGGGATTAATAATAGCATGAGGCACACCAGATATGCCAGCCCTGCTGACTTCTAGCTACATA  
AAGGATGGGTCTAGAGGGAAGAGAGAGGAAGACAGGGCCTGAGCAGATAGGCATCTCCCCCAA  
AGCATCATCCACCTGGCTCCCTCACCTAGAGTATAGGCACTTGTGGGGAAGGGCCAGGGGAGGT  
GTGCT

>chr1\_161171376\_161171576

GAAAGACGTTAGGAAAAGAGGCTGACGCAAGACGGAAGTGGGGTGTGAGGCATCTCTAAGGGCG  
CTTCTGGGTCTGTGATTCTGTAGGTTTCGGGAAGCCTGGAGGATGTCAGGGTCACCCACAGAGGA  
CCTCCACTCCCCATCTGGGATGAGGTGGCTCCTACACACCCCGACACTCCCCTCCGACCACCA  
ATGCC

>chr1\_234859377\_234859577

TGTGTGGAACCGTAGGGGCTTCCCTGGACAAGAACGTGTGTCCATGTGTGTGTGCATACATGTAT  
AATGGTCTTTGTGTGCACATCCTCtgtgtgtgtgtgtgtgtgtgtgtgtgtgtgtgtgtgtgtat  
gagtgAGCAATGTGTGACCGCCTCGGGCCCTTTAAACCTGAACAGGAGCCAAGTTCATTTCTCA  
GCGGA

>chr1\_234860177\_234860377

CGGCATGATTACCCTGGACGGCCGCCAGCCCCGCGCTGAGAGCTCCTTTTCTTCTCTCCGAGCTT  
TTTTTTTTTTTCCCTCTTTCCCTCTGCCAAACATGCAGCAGTTACCATGGCAGTGGAAGTAAAGT  
TTTAAAAAAACACAACAAAGTAGAGAGGCACGCCTTTATCCAGATGTGCCACATGAGCAGATAGA  
AAAGG

>chr1\_234860377\_234860577

CAGTTCACCTATTCATCGGGCCTTTGACTGCAGAAGAAAACACTGGGGCACTGGCTGTCAAGTT  
CGGGAGGGAGGTGACTCCAGGATAAACAGAGCAGCGAGCAGCCCTGGCTGCAGACAGAGAGGGGC  
TGGCTCCCAGGCCCTATTTTCCCTCTCTCTCTCCCTTCCCTGGGGCATTGTGGAGTGCGTAA  
TGTGA

>chr1\_234860577\_234860777

AACGGAAAATGTCATGATTTCCACTGGGAACGTGTCCACGGTTTTGAGAAAGCTCCAGAACTCA  
GGTCCATAAAGCACTGAGGGGAGGAGGAAGGGAGGGAGGAGAATGGGCGGTACACAGTGCCCTCTG  
GTCACCAAGGTGAACCCAGCGAGCAGGAGCCAGTACGTGGCTGTGGCCCAAGCCTCTGCCTGCTG  
CTGGA

>chr9\_99182979\_99183179

ACTGGGCAGAAGGTGATTCCAGGAGCAAAGCTGAGGTCATACCAGATCTTTGCTTGTGGCTCC

ATTTTCATGCAATGAAGAAGCTGTCTGAAGTGTATGGATCATATTCCTGATGTCTTTGTTCTGTC  
TCAGATATTAACAGCCATAAtgtcagaggcctgtgaaccagagcaactccatttttaaaaaggag  
ctggg

>chr9\_132176379\_132176579

TCCTTGGTTTCCAGGCGCTGTAGGCCAGGAGAGGGGGCAGGAACCCCGGCCAGCGGTCCCA  
GACGTTTTCGAAGCGACAGACCCTGGGCCAGCGCGGGGACGCGGAGGGGACACGGGCTAGCAGC  
CCTGCCCTCCGGAGCTCAGGCCAGTCCGGGCTTCCCAGGCCCGGGGCTGCCCTCCCGGAGCCC  
GACCT

>chr9\_132176579\_132176779

CCCCTGGGGGTGGGGGTGCTGCCCGGGGCCCCCTTCCCTGGGTTTCTGGTCCTTTTGTTCACGT  
ATCCCCCTCCCGGATTGAACCAGCAAAGAGCACAAAGCAGAAAATACATCCTTGCCGCCCGCAG  
GCTCCCTCATCCCGCAGAAAACCTCTGAAACAGTCCACACCCGTCCCAAAGTTGAGAGAAACCTGG  
ACGTT

>chr9\_136008779\_136008979

ATGCACCCCTCCTCCCACCCACGTGGTCCCTGGCCCTGCCTCTGCCGCCAGCCTGGGGGAGAGCA  
GGGTCTTTGTTCCCTGCTGGCCAGGCCGCCACGTGATGCGCCACATCACTGTCACTGCCTGGAAC  
GAAGACTGCCATGGACAGCCGAGGCGCTGGGGCCTGGGGGTGAGGCCAGTTGGAGGAGCTCCACC  
TGCAG

>chr8\_95448824\_95449024

GATTGGGTCTCTTTTTGCTGCAATAGCTCCTGTTTGGCATATTCTTTGAGCCTTTTATAAAGGGT  
GCGTAGGCCCTGTGCTGTTTCGAGGAGGGCGGTCTACTCCAATTGCATTATAGTTAACTGCTATGA  
TATCCCAACATCTATTCTTTTCTACTATTACTGAATGTTTATTAGTGTGTTCTTCGAGAATTTTC  
ACATA

>chr8\_95449224\_95449424

GGGAGGGTTTATTAATAATTCCTCCAGCTTAAGCTGACGCAGGTTTCAGGAAATCTGCTTAAGCCAA  
GCCTGACCTACATAAAGCTTCTCACTGAAGAAGACAGGAAGGCACAAGCAAAACACACTTGTGTA  
TAAAGGGAACAGCTCGAGACAGGATTTAATACACAAAGGTCTAGAGATAAGCATGGAACACAGCT  
AAAAA

>chr12\_6444539\_6444739

AGCTTGGATGACTGTCAGGTGAGGCTGAGGGCGTGCTGGGGAGTCCTGGAGCCCCCTGCACACC  
ATGGCATTCTGGAAGGTGTGCTTTGCAGTCTCAGGCCAACCCACAGCAGCTAAATGGCTTGTCC  
TGTTCCGGCATCAGTGCCAGGAAAGCAAAGCCAGGAGTGAATATTTAGCTCTAACTTGGACTTTG  
ATCTC

>chr12\_6446939\_6447139

AAAAAATGTCTTGGTCAGAAAAGTGTCTTATCCTCCCTGGTGTCTCTCAGCTCCCAGAACCAGA  
CCTCCAGACTGGGAGCAGATAAATATGGATCAACTGATCGATCTAATGATACATCTGTCTTCCAC  
TCTAGTAGAAGCCAGTGATTCCCAAAGAGGGAGGTGAGGAGACAGCACCCCTGGTAGGAATATAT  
TTATC

>chr12\_45628533\_45628733

CACTTCCCTAGCTCAGCTACATTCAGTCTCTGGAACCAATTCTGACTCCAGGCAGGCAAGATGAG  
ACAATTCAGCATTTACTATCAGTCCAGCAGTAACCTTTCAGTTCTAATAATTTGGCTTGTCTTT  
TCCTCCTCAGTTGTTTCAGACTCCTTTCTCAGAAACATGCCTAGGACCTCAGTCTCTTTAGTTCTT  
TGGAT

>chr12\_45629533\_45629733

GAGTCCAAAAAGTTGAGAACTACTCCTGGCTTTTTCTTCCCTCCCTCACACTGACGGCATTCCCT  
GAACTAGCATGCCTGTCTGTCTTACATTTCTGGGTGACTGCCTCATCCCAGGTGGCCTTCCCTCC  
AGCTGTGAGCTGGGTGTGTTCCAGGTATTTAATCCACCCCTGGGGCAAGTTCTTCCAGGCAGCC  
TCCAG

>chr12\_56520333\_56520533

ATAGGTCACCCTCTCCATTCCCCATTCTCAGGAACCTCCTTGCCTACTCCAGTGCTTGGCAAAT  
TTCAGTTTATAGAGAGGTTTCTCTCTAAGGTTTCATCCATGTTCCCTTCTGTAGTTCTGCTTTATCA  
GTTGGTGAGCAGGTCACCTCATAATTCCTCCAATTTCTTGTTCCTTTTTCTACCTGCTTACCTC  
TGGGA

>chr12\_56694733\_56694933

TGCTTTGTGAGCTGTCAGTTCTGTGTGTAATGGCAGGAAATCCAAGTCTTAACTGCGCCCTTACT  
ATGAAGGCTTTCCGAGCCAGCCACAGCTTCTGGGTTCATGGGCATTAGTCTCACTGCCACTCTGGT  
CACGTAACCCACACAGCAGCTCACCCACTTTAGCCACAGATTAGGAGCCGCAGACTAGCCCTC  
CATCG

>chr12\_76337733\_76337933

ctgcTTTGTGAACTCTGTGAAGGAAATCATAGGATGTAAATATAGCTCCATCTAGACAGACAAG  
AAGACATGAGATAACCAGTGGTGGGATGTCTGAGATTCTGAGGAGTTAGAAATGAAGGAGAGGAAA  
TTTTTATACCCTCTCTCTGGTCCCTGGTCTTATATTTATGAAATTCCTACTTTTCAGCAAAGAAAA  
AAGTC

>chr12\_109083271\_109083471

GGATTCAGACTGCTTTCTACACGGTTTCCCTTATCTAATCCAACCTCAGGCAGCTGTCTCACTTCC  
AGTACTTTTCCATCTCCTGATCTGCAGTCCTCTATGCCTATTATCCAGACTGGTTACACCACCCG  
AAGATGTAAGGGCCTAAGAGCCCCACCCATCCTGGGGAAGGCAAACAAAGATACTTTACATGA  
CCTGA

>chr12\_109084671\_109084871

AAACTGGTTGTCTAAGCCCTCGTAGTAAGCAAATGACATTGGAGATTGATCTACTGAAACCCTCT  
GTGAACGCTGAAGAGCTCCAGGGCTAACCCCTCCCATTGCAGCTCTGCATTGGTTTTAATCCACAG  
GTCTCAGAATGAAAATCCACCCTCCTTGGATGGTGGAGATGATAAATAGAAAAATATTACAACCT  
TTTTT

>chr12\_109084871\_109085071

GGGGGTGGGAGGGGCTAATGCCTTGGGCTCCATGGCTGAGTCAGTCCACACAAGCAAGAGGAC  
TGCAGTATAGACTCAATTCAGTCAGCCAGAAATGAAACCCAAGTCACCGTTCCCTCCAAGAAAGCA  
GACATGTGTCCCATCACATGCCCTCTCAGCTCATTCTTCCCAGACTCAACTCAGGTCCCACCC  
TAATG

>chr12\_109086471\_109086671

CTGACAGAATGAAAGCCCTGTCAAGTACTGTTTTTGTATTAACTCTCTAATCCCAGAGAAAG  
AATGCAAAGGATTCAAGTCCATTAGACCACAGCTttttttttttttttttttttttgagacagagt  
cttgctctgtcgcccaggctggagtgcaatggtgctatctcagctcactgcaacctctgctctct  
gtgtt

>chr12\_118558417\_118558617

gaatttgggggaaataaaggattactagggaaatgaaatgggtcaggaactagaagagaaattaac  
ttgtaaatagatgtctttgaaatgtgaaatgagcctgacattatcttatgaaaggatctgttcagg  
tgtgttaccttctgtgtcttctttctgcaataaagagataacagagaggggaaagaaagaaca  
ttgtt

>chr11\_355400\_355600

GGGAACAGATGGCTCAGAACACAGGAAGTTAATTTAACTGCAGTCCAGGGAGGATGGCATTCTGG  
AAGCCGAGTCCGGCTGAGGTCTAAGGGGCGGAGGGAAGTCCAAGCTTGGCCTGGAGCTCAGGGAA  
GGGAGCTCGCGTGGACTTCAGGAGCCCGGTGGGTGCTTCTGTGCACAAACGGGCAGGGTCTGAG  
CTCCC

>chr11\_355800\_356000

aaccgcttctgcgggcggttcccaagccccagctcccgcagaaggcctggaggggcccggggacc  
cgtgccacgcagtgagtggcggcaggacacgagcccGGGGGCGCAGCTTCTGGACTCTGCCC  
CCAGACTGGCTGCCACGCGGGACGGTGACCAGCGCTGCCCTCGGCGCCCGGGAGGCCTCCCAG  
GGCTG

>chr11\_6628024\_6628224

CTTTTGGCCCCGAGTTTGGCCTGCCCTGGCGCCACAGGCAGTACTGGAAGCTGATAAGTCAGGG  
CACAAATTAAGGTCTAGGAGGCAAGACCAACTGATAAACAGGGGGCGTAATGCTTCTGGGGAT  
AATCCATCTCAAGGAAAAGCTTTTGGCTATTTCTGTGTAGCAGATGCGAGCAAGTTGTGGAGG  
AAAAT

>chr11\_6628424\_6628624

TTTCTTTTATGGCCCCAGGCTGTCAGGCAGGCCAGCTCCAAACCAATTGTTTTGTTTTGTTT  
TATACTTTACTTTATAAAATACATATTTCTTGAAAAGAAAAAATCAGGTATAGTTTTAATCCC  
AAAACAGCCATTCTCATTTTCTTCTGTTTTCTATGCACAGGATTGCTAAGTAGGGGAATCCTGCT  
TTGCA

>chr11\_6628624\_6628824

TGGTGGTTTGTATCTACCTCATCAGTAGTCAAAGCATTTCTCCTTTTCAACATAAACCCCTTCC  
AAAACATCATTTAAATTCCATTCCATTTTTAGATGTTAGTTTCAGTACCAGAGCCAAAATAGTAAG  
TTTGTCCCTCTTCTATAAGTTGTGGCCTGCCTTCTCCAAGACACCCTTCTCCCCACTAACATG  
CACTG

>chr11\_6628824\_6629024

AACAGCTGCTGTcaatccattccctcaagaaacttaaaggctaacagacaagacagtccattaa  
cagatttttacaatccagtgcaacaagtgctgaagtagggggacataaagatgtgggtggaaaac  
agaaaggaCCAATAGATGTTGCAGAAGGGGTGCAAGAGAAACCAGGGGAAGAGCACTACCACCTA  
AGGAA

>chr11\_47429024\_47429224

GGGAGGCTGATGAGGGTCAGAGACTTAAGAGACCTGTACTCAGTCGCTATCTCTGCCCAAGTGAG  
TACCCACATGCCCCCTTCTGAATCTTCTCCTGTACTGGCTGATTTCCAGAGAAGAATACAACTC  
GAAACGCCAAGCCAGACTCCCCTGCTGTTTCCAGGACCTAGACGTGAGAagtggatcacatactc  
tggct

>chr11\_62321024\_62321224

TCAGGCTGAGCAGGGAAGGAAGGGCCTAGGCTGCCAGAGCCTGAGTCACCACATAGTTGAGGTT  
CCTGTCCTCGAAGTCCCGCCTCTGTTTACTCCTGCTGCTGCTGCTGCTGCTGCTGCTGCTGCTG  
CTACATCTGACCCTGGCCCCAGGGCTGGCTCCACTTCCACGCTCCTTACCAAGCTACCCTTACCA  
AGCTA

>chr11\_62324024\_62324224

CCCACCCCATCTAGAGGCCAACGGCCAGCCTTCTGGGGCCACAACCCTCTCGTCTTGGAGGCT  
CCTCCTCTGCTTGTGGGTACTGGCCCTAGCCCAAGTGCAAGCACTGCTTCAAACAACAACCTGG  
CCACCCTTACTCTGCACCGCGTGGCGAGGGCTGGAGGCAGGATGTGCAGATGACTCACTCTTCTC

GCAGG

>chr11\_65186824\_65187024

CAGCTCCAGAACTAGACCCGTGGAGAATGGAGGGCTGGGGCCCTGCACATTCTCAAGCAGTAGTA  
GCAACACTGTCAATTGTCTGCCCTTGGTATAAGCCTGAAGAACCACCCTTTCTTACCCGGCTTCT  
GCTCCCCTTTTCCAGGGGCTCCTGTGGGAAATCCCGGGTACTTCTGGGACTGGTCTGTCTATAT  
GTTTG

>chr11\_65420624\_65420824

AAAGCATCGGTGGGCCGGGTAGATCTTTACCTGGCACCACACATTCCCCAAGAGAAGCACACACT  
CCCTGGGCCACCCAAGGAATTTGGCCCCATCACATCTTTGAAACATCGTTTCTTACCTCTGAC  
GCTGGCTAGTCCCTCTTTGACATCCACTCTCAGCTGATCTAAGACCTGGAGCTAATGGGGCCTCT  
TGGAA

>chr11\_65420824\_65421024

GACTCCTGAAACTGCTCCATCCCCACAGCCAGCGGGCTCTACTAGGCTCTCAGTGTGCTAGGACT  
CTTGCCCTTAGCTGCCCGTTTTTCATCCACTGGACGGTAACTCGGGGTTTCCAAGGGCATTCTCAGA  
CTGCAAGCTCTCAGAGGACAGTGCACGCATTACCCAGCTCTCTACCACCAATGTCTGGCCTGAT  
GTGAC

>chr11\_67055624\_67055824

GAAGCCTTCGGGCTGCTACCAACCCAGGACCTCACAGATTGACACCATAGCGTGGGGTGGCAA  
GTGACCCAGATGGCACAGGCGCCATGTGACTACAGGGAGAAGGCAGGGTAAAAATGGCAATCAG  
GCCTTCCAGCCCAGAGTCTCAGAACTGAGGACGCCCTACAGCAGGAAGTGATGCTCAAGCTAGCT  
GGCC

>chr11\_71750952\_71751152

CCGAGATCTCACCTGGCAGGTTACCCAGAGGGGCCAAGCCACCTTGCCCTAGGCTAATAAGCTAT  
AAAAACAGCATAGGAAATACTTTGCTGGTACATCCCCTGCCTCTGAGAAGATAAAAAGGCAAGAGG  
ACCAGTGGCTCCAAGAGACGCCATACAGAGAAAAACAATCTTTCTCAATTCTGGGGAGTCTGG  
GTAGA

>chr11\_118783590\_118783790

TGGCCTCTGGCTCAGGGAGATACAGCGCCGAGACGACAGGGTCCCAAATCCCCTTTCTCCTGGG  
TGTCAGGACCCCTCAGTCCTCAGAAGCTCTCTCCACCACTCAGGTCACCTTCTCCTCCTGAGGTG  
GTGACTCAGCGGGCAGGGAGGTCAAGGATTCTGAGCCAGCAGGAAATCTGCTCAAGGACCAAGG  
TGCTG

>chr10\_74081194\_74081394

TCCTCCCAAAGAGTCAGAGACCCCTGCACCCTCAGCCGACCCAGGCATGACAGACCCCGCCTC  
ATCCCACAGTGCACAAGGAGATCACACTcagatctgggcccagctctggcgtctgcccaggcca  
gctgcatgaccttgggcaggtgattgaatgtttttgggtctccatttttccacttgtgaaatggg  
gatag

>chr10\_74081394\_74081594

cgatgcctactttgtaaagctgttgtgaggctgggggaaaatgagaacgatatacaagtgttcaca  
gtagaggccagcactgttgtgagcgcGAGCTCCTCTCCCTCCCCTCCCCTCCCCTTTCCCTATC  
ACAGGTGGGGCCAGGTGGAATGTCACAGTAAGTCCTTGGGATAGAAAGGTCTACTGACATATTC  
AAGTG

>chr10\_103911410\_103911610

GTGAACTCTGATCCCGGAGGAAGAAGGGTTATTTTCAACAATCTCTTCAGCTTGAATAGATTGTT  
GCTGTGTGTGATTACAGTTTGGTGCATGACACCTTTCTCCTTTCATGGAGCTGACCTAAGCGGAA

TATAAGGGAGATGGGAGGGGCAGCTTGGGAAATCAACACCTCCCACCCTCACGACGGATAACCCG  
AAGGA

>chr10\_105668210\_105668410

CAGGAAGCACCCAGCACAGGCCTGCGGTGAGTCAGGGGAAGCAGAACCCAGAACAGCAGGGAG  
CGGCCACCTGGCAGATGGCCAAAAGCCATATTGTGCCTGAGGACAGCAAGGAGAGGGGCAGTTC  
TCCACAAGAATTAAAGTTGCAAAAAGCCTCTCTACTCTCAATAATTCAGCAGTCAGATGCTTTTT  
ATTTT

>chr10\_105668410\_105668610

CCCAAAGCCCACAGATGTTTCATGCTCCTCAGACACTCACTCAGAGGGAAATGCTTACTGGAGAA  
GAGGCAATCATAGTGCCTTAATCTTTTTATAATGGGAAAAGAGGTTAAGTGAAGCTCCTTTAGAC  
ACAGGCTTAATATCTAGCCTGGTCTAGGGCCAGGATTTTAAAGTCCTCAAACAGTCTCATTAT  
TTGAT

>chr17\_27073273\_27073473

GCTGGGTGAGCCATTGCTCTGCCTGAGCCATGCCAGGCATGTGTGACTGGCCCTGGCTGGGGTCA  
GCAAGGGCATGTGACAGAAAGAAGCATGCCAACAGGCTCCTTGGGTGCTGACGGCCAGGTAGGG  
TTTGGTGCAGGAGAAGGCGGGCAGCTAGCAGGAGGGGACGGTCACCAGGCTTCAGAAGCCACTG  
AGCAG

>chr17\_38267474\_38267674

AGCTTCTGAAATAGGTGCTTTCCCTCTCTCCCACTATAAGCCACAGTGTTTAGGATGACCACTGC  
TTCCAGATTGTGTGATTTGCCCTGGCAAGGAAATCCTATTGTGGGGGAGGAAATGAGGCAGTCG  
TGACACAAAGTGATGGATGAGCCTTTTGCTTAGCAGAGAGAGAGAAAGCCGGCAGGCTGTGCA  
GAACT

>chr17\_41560874\_41561074

TAAACAAGAGAAGGCAATCTACTGCCTACTGGCTTGCAAGGGTCACTTGAGATCGGACGACAG  
GAACCACAAAGAAGTGAGGCCGGGAATTTGCGGATCCACAGTAAAGCAAGTTTGTCTTTTTCCAG  
ACGTGCATTAAGATTCCTTTTTCAAGTGTCTAAAGCGCAGGCGCAGGCTGTTTTGCGGTTGCCT  
CCCGG

>chr17\_57914618\_57914818

CATTAGGCAGTGTTGCAAGTACATATCGGAATCTCTTTGGCTGGCTCTAAGAAAGAGTTTGAAC  
TATTTACCTCCTTAGCCCTATGTAACAGGTAAGAACTAAAAGGTACAGAAAATAGAGATGTTTG  
ATTTTTCTAAGTTGCCCAAGCTACCGTTTTTAAAACGCCTGCAAGCATGTCTAAAACAGGAGC  
CTGTT

>chr17\_57923818\_57924018

TGACTCAGAGGACCTAGAGGGAGGGCTTGAACACACTCCAGCACTGTTTCTACAATTTAGCCTTT  
ATTTGCATTGGAAACCACATTCCTGAATTCCTGAGGGGGCAGGCTCTGGCTTATTCTGGGCAACT  
GACTTCAAGTGGGACCCCTGAGCTACCTATGTAAGCAAAGAGTCAGCCATCTCTGGAGAGTTACC  
AGGGA

>chr17\_57924218\_57924418

GAAGCAGTGATCAACATTGCTTAATTGTGTTCCAGTCTGTTTCCAGCGGGGAAAAAATGCTTTAG  
GGGAGTGAGGCAGTTAGGGATTTGAAAACAGGGATGGTGCCGCCTGAAGGTGGGGAAATGACTTAG  
ATCACTGTCTTCCTTTGGCTCCTCACCATGTTGTGTGGAGGAAACGAAAAGCAGCTCAAGTTCAC  
TCCTC

>chr16\_21513899\_21514099

CCCTGGGGTGC GCGGCACACAGGCGGCCCTTGATTACGTGTGCCAGTTTTCCCACTTTCTA

CGGGGCGGGGTGGAAAGTGAAAAATAGTCAGATCGACAGGTGGATATCCACCTTCCCAACCTCCAC  
CTGAAATGTGCCCATCGAGTCTTAGCACCTTTTACCATTTCTTCCCAATGAAAAAACTAAACGA  
TGGAA

>chr16\_29607099\_29607299

AAAATAGTAAGATCGAGAGGTGGATATCCACCTTCCCAACCTCCACCTGAAATGTGCCCATCGAG  
TCCTAGCACCTTTTACCATTTCTTCCCAATGAAAAAACTAAACGATGTAAGGGAAGGGAGTACC  
CACGACCACCAAACCTGTCTCTGCAATGTGAAATGTGCTTTGAAGTCCTCTCACCTGAGGCT  
TGCCC

>chr15\_58624308\_58624508

CAGAAGCCTGCAGCCTTCCGGGGATTGGCTCCCTGCGAAGATAACCCTGTCTTCAACAAACCT  
CGCTTCTTATTGCAATTCCTAATTGGCATCTTCTATTGCTTTTCTGCTGGTACTTCATTTTTCACT  
CTTGGCTAAAAATGGGTCTCTGATGATTTATTCTATCCTGGGTGTTGACAAGCTGAAGAAGTTGT  
GTGGG

>chr15\_89181396\_89181596

ATCTGGGGTAGGAGGCAAGCGTGGGTAACGCTCAGCTTATTGTTGGATCTCACCCACAGTGAAGA  
CAAGCACTTCCCTCATTGAAAGTTGATTTCTTTTTGCCCCAGTTGTAactcatttgacattcac  
taaataccaagccctccctatctggcaggcactgttctaagagctCAAAGTCCTAGCCTGGGAGA  
GTGTG

>chr15\_93460796\_93460996

caaacaagcaaaaagaaaaaaGGTGTGACCAGTCAGTCTTCTTTGCTTTTCCATCTTAAGACA  
CATAGAAGTGACTGAGAAGGAATAGTTATGCAATGACATCGGTTTAATAATCAGTTCAACTGAAG  
AATGTATGTAAATAAGGGCAGTGATACCTAACGCTGATAGTTGATAGTGTGGATTGCATAATTCA  
GACTG

>chr15\_93460996\_93461196

TGGGGTGATATCTTACACACGCACATACACACACACTCTTGGGCTTTGTCTTCTTTATAGGTA  
AGGATTAGGAGAATTTTGACATATGCCTGACACAAAAGTGCTCCGTAAATATTAGCTATTGTATC  
ACTGGCAGGAAGTTAGCCTGAAAATAAGTTTTATGGAATTCAGTGTAGATTGCTTTGTGATTGT  
TTTGC

>chr14\_23789760\_23789960

GTTTTGAGACTTTACCTCGCCAGCAAAGGGGGGCCAGTCTGTTAGCGGTGCAGATTGGAGGGGTG  
ACATTGGAAGCTGTCCAGGAAAAAGAAAATGGAAGTGGGGAGCAGAAGGCCTACGCAAGAGGGCG  
GGACAGACAGGACTTGTGACTAGTAGCTCTGGACTGAGGAATCCTCCCTGCTTTCTGGTGGGGA  
GAGCT

>chr14\_55570247\_55570447

TAAAGGTGAATGCAGCCCCAGTGCCAGCACATAAGGCCAGTCAGTGCTATACAGGGTCAGCTTAG  
CCCTGGGCTGACCCTTAAGATCAGGAAAAAGTTATGGGGCAGTACTTCTCAGCAAGTCTTTTCC  
ATGTTTCTGGTGTCTTCGAATTCCTAGCTGAACAGAATTTATCAAAGCAGAAGGTAGCTGTTTAT  
ACCCC

>chr14\_55570447\_55570647

AGTTTACCCAGGCAAAGAGAAAATGCTTTGGAATTGAGATATTTTCAGGGCATGAGTGGTTTAGAT  
CTCTGAAACTGGAAGACGAAAATCCAGGTTATTAGAGATCAGCAGCACCTGAGAGGCAGGCTTCC  
TGGCACCTGAAGACTCACAGACAAGCCTTGGTAGCCTGGCTTGTTTTCTTGCAGTTCAAACCA  
TTTCT

>chr14\_75725447\_75725647



CGGGGAGGTCACCCTGACAATTATGGCCAACCTGACGGTGGAGGGAGTGGTCTCGGTTTGGCCCTC  
AGTCTGGAGTCACAGTCTGGATTCACAGGCAGCGCAGAGAGATGTTGGCTCAGGACCTGAGGCTG  
AGGCGTGCTGGGACAGCCTAGGGGGTGTCTGGCTTTCCAGGGGCTGGGGAACCCCTCTCTGGCC  
GGGG

>chr19\_1270600\_1270800

tactaaaacaaatttaaaaaattatccaggcgtggtggtgtacacctacagtcccagtttcttg  
ggaggctgaggtaggaggattgcttgagcccaggaggtggaggctgcagtgaccctgcactcca  
gtctgggtgacagTTAGACACACTGCCCCGACCCCAAAAAATAAGTCCTAGGTATGAGTTTGA  
GATAA

>chr19\_1415400\_1415600

TTTTTTTTTTGAGAAGCTTGAACCTTAATTCCAAAGGATTGTGTAAATGAGCATTTTTCCGGT  
CGGTTCCAGCCAGGCTTGGGGGCCCTTCTTCATGGGGTGGGGGCTGCTGCTGGCTCCTGCTGGG  
TGCCGGGGCCCTGCTGGCAGGGATGTGGGCGGGGCTGGCCCTGACTCAGCGCGGGCACAGCCTATG  
GAGAG

>chr19\_3983600\_3983800

AAAGCCTCCAGAGACTCCGACCCCTCCCCTCCTCACTTCTGCCCCTGCTCCAGGGGAAATGAAGAG  
CCTTAGCCAGAGTCCCTCACCAATGTACCAACCCAGGACAAAAAGCAGTTGGGGTCACCGTACTC  
TGCGCTCCCCCTACTCATATCGGGGCCAGAACTGACATGGAATGAACATCATCCAGTGCAACAC  
AGGAG

>chr19\_5968200\_5968400

CCTCTCTACACGGAAGCTTACAGGAAGGAAATCCAAGAACTACAGAATTTATGCTGAGGCAGCAG  
AGCAAACTGATGATACTGGagagcgcgggctctggtctttgtgtgtgttcaaacctgcctggc  
cacttacttgcggttgggatcccagataagacaatgtacctctggcacaatgtcttcatttgc  
atcag

>chr19\_5968400\_5968600

ggctgttatttcaccccaggcagcttcggcaaggatgaaatgaaatgctgcacatgccgtgtttg  
gggaagtgttggcacacaggatgattccacactggcactggtagcattattatGCTCGGAAGAT  
TGCAAAACATATTGATGCCACCTTAAAGCATAGGCCTTGGATTCAAGGACAGCTGCCAGTGCCCGG  
CAACG

>chr19\_6738000\_6738200

GACGGACTTCCTCTTCTTGGACCAGGGATGTGGCTCCAGCCAGAGCTGAGGCTTTTGGTAAACA  
CACGCATCTGTTTCAGGCCTGACCTGTTTTCTAATCTTCCTGGTCCACAGAGAGGCCTAAAGCTG  
GCCTCAGGTTAAAGTTTGACCCTAGGATGACCTATGACCCCAGGCTGAGACCCCAGCCTTAGGCT  
AAGCC

>chr19\_6738400\_6738600

CTGACTCCAGATTGGACCTGACCCCTTACCGGGTTGCTAATCCTTCTGGTTAAGCCTCTGGCCTC  
TATCCCCTATCCCACGGTGGTGCTGACCTGGACTGAACCCCAATTCAGTTTGGAGTCTCTGAGC  
AGAGGTGAACTCAGAACTTTGCTAGGCTGAGCCCCATTTGAGACTAGCCACAGAACTCACTGGG  
TTCAA

>chr19\_6738800\_6739000

TCTGAGGCTGCAGAGAAAGCGCCAAAGCCCGGAGAGAATGGGAGTGGGAATCCCCAGTGCCCTCCT  
CTCCTCTTTCATTCCAGCACCTCAAAGGGATTTACAAGGTGTGAACAGACTTTTATGGGAGAGGT  
GACAGACTTCCCTTCTCCAGGGCCAGATGGCCAGATGTCTGGGGGAGGGGCGGAGTCGGAATC  
TCAGG

>chr19\_8066800\_8067000

CCTCAAGCGGTTTCAGCCATTACGGGGCCACCTCAGTACTGCAACAGCCTGTGACTGGTTTCTCCT  
TGTCTCCCCCAGCCTCTCCACCAGGGTGAGCAGTGAACAAAACCTGCTCAGTAGCCACCCCTGG  
CCTACCTGCAGGGTAACAGCCAAGCCCTCTGCCAGTGGACACCTGAGCACTCCTGCCACCACTA  
CCCAT

>chr19\_8067200\_8067400

cccttttctgggcttccacatcagccagggcataattctcacagcactcatcaGAGTGGGCTGAG  
ATGACCTACACACATCATGCACACTCTCCAGAGCCTAGCGGGGGCCAGGACACAGCAGCGGAGC  
AGGGAGAGTCGTTTCAGAGGAGGGAGCGAGCCTCACTTCCCTCCCACAGGCTGGCTTCCGTTGGTC  
TTCCC

>chr19\_11253600\_11253800

CCGTCTTTCCTTGGGGAAACTGAGGCCAGGTTGCTGGGGTGGAGGGGATGTGGAGTGACAGGG  
CAGGGCAATGGCTCCTCGGCCCCCTCCGGGAACAAAGCCAGGTCATTCCTGTGGGGAGGGAGCGC  
CAACCCAGGGTTGGGGGGGGCACGGGCCCTGGGTACAGGTTACAGATAAGCCTGGGCTCCCAGA  
ACCCT

>chr19\_11253800\_11254000

TGTCACAGCGGCACCCCTGCCCCATGCCTGCTTTCTCTCCAGGGCACTCAGAGCTGCAGTTTGCA  
GGACGAGAGGGAGACGTGCCCAATCCCCCATCCCAGGACGCTCAGCCGTGCGTGGGCTGGGCC  
ACTCCACTCCCGGCGCCACAGTTGCCCCAGTGAACCGGCCAGTGGAGGCATCCTGTCCCCTGTG  
CGGGA

>chr19\_11254000\_11254200

AAGGAATGACCGCCAAGGTGACAGCAGCGCTTAGCCAACCCTGGCGCTGACACCTGACTTGCAAA  
CTGCTCCCTGCCTGAGGCTTCAAGGCAGGCGAGAGGCTTTGTGTGTgtgacttcctccccgaagg  
gacactggcaacagctggagacatttctctgttgtaaggctgagggggagctgctggcatttggt  
gggtg

>chr19\_13275800\_13276000

tacaccaggatctccagggcatggacagggatggggctcggggaaccagggcatcctaggtgaatc  
caaggaacagccatgtctgcaaaccactgTTCTAGCTGCCTTGCTGGGCTTACCTAGGGGCCACG  
ATCCCTGAGTCAGTTCCCTTGGCAGCCTGGGTCTCAGTTCCCTTGGCTTGTAGAAGTTCTTTCA  
GGGC

>chr19\_13957400\_13957600

GCCCACAGGTCACCCAGCTCACATGCAGGGCTGCCTGCTGGGCCCATGGCAACGCCACACACA  
GAGACATCAAACAGGCCCTGCCGAGGAAGTCCCACGTCACTGCGGTTAGAGTGGCTCCTCCCAGC  
CCAGCCCCGGCTGGCGGCAGTGACCCCATGCCAGTCAGGGCCCCTGCCTCCTGTTGCCCTGGC  
GACCA

>chr19\_13957600\_13957800

GCTGTGTTATGGACTGAGCCGGGATCCCACCACATCCCTGCCCCCTCACCAGGGCACCAGCCACT  
CCCCACATCCGGAGAAGGACATTACACGGTGGCCCCAGCTCACCGTGACAACTCAATTGCCTGG  
TGTCTGGAGCACCAGGAAAGACTTTGTCTACCTACATAATGGTTCAGAAGGGCAGAGAGGTCCCA  
GGGAT

>chr19\_18393200\_18393400

ggctcagagaggtggagtgaccatcccccgagagtttagctaggagtcacagcagggcccgggctg  
tgactaggcctgagctcttgtccACCCTTAGAACCTTAGAACCTGGGAGTCCAGGCCCTGCGCA  
GCCCTTCCTTCCGCCGCCACGTTTTAACCCAGGCTGCCAGGGCTGTGATGTCCTGGGCGAG

GGTGC

>chr19\_18484400\_18484600

CCTACAGGAAATAGGATTTCTGTACTGGGCATTTGAACCCCATTCCTTGTCTGCTGACCCCC  
AGCAGTCTCAATATCCCCTACTTCCTCTTCCCAGAACCACCTCCCCAAAGCCCTTATCGATGCT  
TGGAGGATTCCTATGCATCCCTCAAAATCCAAGGTTTGGGAAAGATGCTGCAGTGGTCTCAAGAC  
ATCCT

>chr19\_18484600\_18484800

CAGTGTGATGACAGCCTGGGGTGGGGGTAAGGGGGCAAAGTACAGCACCAGAAATCCCAACTGAG  
TCCCCCACACGTCTTCCACCTTCCCACCCTCTCTTTCGGGTCTGGCTCCCTGCCTCCAGGCAA  
TCACCAGTTTTTACCAGGAGTGCCTCAGACCTGCCCGGACATGTCCAAGTCCCCTAGAAGCAGGG  
AGGGG

>chr19\_18485200\_18485400

AGTAGAATTATGATGGGAGCGAGCGTGTGAACTGGGTTGCTAATGTGGAGCGTGAAGAGGGAGGC  
CCAGGGTTACTCGGCCAATGGGTTCCGGGCAGCAAGCACGTGGGGGAAGCCTCAGCTGACCACTT  
CCTGGCCAGTTTATGCAGGAACTCGCACAGCCGGTCCCTGAGGCTGAGCCCACCACTTCCGCCCC  
CCATG

>chr19\_34662560\_34662760

ggatataattgtgtatacataacggagaggtgtagtgcagaacagatgtggaagcaagacagggcaa  
ggctgactcacggcttttagtctgagcagctgagtaaaaatggtaccgtttacatcaaatagggga  
acggtggtgaaggagcaggttagaggggaaacaggggagcatggctttggacccttaacgtttgag  
atTCG

>chr19\_39156360\_39156560

CAGAGTTACAGGCCCTGAACAATTTTGTGTTGGGATGTGCCATAGGCAGTGCCAGGAAGGTTCTT  
TCATGAGTAATTTAACTTGTACTAAGTTTGCTATCAGCCGGGGGGCTCTTTCCCGGGTTCCTT  
TCTTTCCCTGGGTCCCCTTCCCCGCAAAGCAAAGTCCAACCTCAAGTTAGAAACATCCCACAGCCT  
GGAGT

>chr19\_39173560\_39173760

agtcacataactccgtgttatggtaccatccctgtctccttagcttgtttttgtctgtattggc  
tcttccactagactgtaagttgcatgagggcagggatgtctgtttaatcccagtgctcaggatag  
tgtatggctcgtgatagatgcctagtagatcttttaaaatgagaacgaatgaaGTTTGGGAGAGGCT  
CAGAG

>chr19\_39173760\_39173960

CAGTGAGTCTCCCCCTTGTGGGGGACTGGGGAGTGCCTGGGAGGGGCTATCTGGTGCCAGCGGT  
TTGGAGTGGCTGGGATGACTCTGGAATCCTGTGAGGCCAGTCAGTTTCTTTGGTTCTCATGCAG  
TGCAGTGCCCTCAGACCTAACCATTTTGTTCCTGCTGGCTTGAAAGGGTCTGCCTCCCTCCCAG  
TGCAG

>chr19\_39174960\_39175160

GGTACCCAGAGTCTCCTCGGTCCCTCTCCCATGGTGTAGTGAGAGCACTCAGGACCACCTAGGC  
CTTTCCTAGAAAACCTGAACCCACACCTTCCCAGTGCTGCCCCACCCTGGTCCCCACCCCTGCA  
GGACAAACCACTCCTCCCTTGTTTTGGGGCCAGGAGTCAGATCTGCCCTGAGAGCAGCAGGGGGC  
CCCTT

>chr19\_39175360\_39175560

CTCTTTGGCTATAGAATCCTATTTTGATctctctctctctctctctctctctctctctctctctCTCTCTCTGTGGT  
CATGGTCAGGTTTTTCTTTTTTTAAATCCTCCCAAGACACTGCTAATGTTGTCTGTCTCATGCAT

CCAAGGAATCTGAGATGGACTGAATATTGTCAAGGGAAAAAAAAAAGAGACCCCCAAATCCAGAGT  
GATTT

>chr19\_39888760\_39888960

GTTAATGTGTTTCTCCCCATGGTCCTATTTCTCTCACTCTGACCTCTCTCTCTTAGTCCCCTTTA  
GCTGTCTTCTATCCCAGCTCCTAACTGGGACTCTGTGTCTATGCAGGGGGCCAGCACCCCTGGG  
TTATCTGGGGCTAAGGGAAGGGACTTCATTTCCAGGGGCCACAGCCAAGCCCAGAGTCCCCCAGC  
GGCTC

>chr19\_45959160\_45959360

CTGGGAGAAACCCCAGCCACATACCTGGCCGCTGACATCACCCGGCCAGGGCACCCCGGCAGCC  
TAGACAAGCTGACTGAATCACAGGCGGAATTCAGCCACCCCGGGCACGTGGCCTGCTGTGACCCC  
CCGCAACACCCCGAGTGGCCGTCTGGCTGCGGGGGTTGGGCCGGGCACACAGGGGTGAGTGAGG  
GGCA

>chr19\_45959360\_45959560

TGGGGCCTGAGTCAGGGACAGGGTGGCTACAGCCAGAGACCACCCAGCCACAGGCGTCCATGTGG  
GGCAGGAAGGAGAAAGTTTGGGAAGGAGAGCCTGTGGGGAGGCCCTGGCGGGTGAGGAGGAAGCA  
CGTGTGGGTGTGACGGGGAGGCTGCGGCTTGTGGGCAGCGGCTGGGCGACCCACAGGGGTGGGAT  
GGGT

>chr19\_47611560\_47611760

TAGAACTGGTTTGACTTGATAGCTATCCACGGAGACCTGGAAATAGTTTCATTAGCAATTTTCA  
CCAGAGGTATTTACTGTAAGTGGATCTGACCTCTATGGAGAGATGTTTCTACAGGCCCAATAGCC  
ATAAAAATGTAACAAAAGGAAGTGAAGGACCCTCAGACAGCCATTTCTCTCCCATCAGGGAAGAA  
GGTAA

>chr19\_47612760\_47612960

TTCAAATAAGTGCAATTCATTTTGGGCTGACCCAGTGCCCTGGATAATGTGTTTTGTTCCGGTTCG  
TGCTTCAGACATTTCTTGAGGATATCGTAGTTTGGAGATTTCTTCCTCCCGTAACTGATTTTAC  
ATACCTAGGATCACCCTCTACGGCAGTTGTGAACATATTAAGAGGAAGAAAACAAGTGGCCTAT  
TGAAT

>chr22\_30591800\_30592000

CTGTCTGGAAATATAAAGGCTCACATTGGCTTTGGCCACCAAAGAGAGGAAACATTCGCAATCC  
TTAAAAACTCATGGCCGAAGGGGTGGGGAGAAGTGTGAGCCTTGTACTTACAAAGTCAAAG  
GGAAAACATGTGTTTACATTTGTCTTGGGATGGGAAAGAAAACTTTTCCTTTCACTTAATCTT  
GGTTT

>chr22\_30592200\_30592400

TCAGGTTTCCAAACCTATAACCCCTGGTTTTCAGCCGGAGACTTGAGGCAATACAGCTTCAGTCAT  
GACTCAGGATTTTTCGAGTGAAAGCAAGCACGTCAAGTGATGTAAGAAAATTCCCCCATTCCTCC  
AACCCACTGGCTTCCTCCTCCCTGGAGAATTCAGTCAGACAGCATTGTGTTGGGGGTGGGGGAGA  
AACAG

>chr22\_35772800\_35773000

GTGGTCAGGACACCGTCTGTGACCTTATTTACTGGGGACGTCCCCTGCTTGAGGAGAATATCCAG  
GCAAGGTCTCCTCACTCTCCTTAGCCACCATCCAGCTTGGCCAAGAGGCCTCCCCATGATTCCTC  
CCACGCCAGGGCCTCGCCTTTGTTTTTCACTGTTAGGGGCTGGCGAGTCACTGACCCGCCCCCT  
CCCTG

>chr22\_35773200\_35773400

AGCTTTAATGGTAGGCAGGAGGAAGTGAAGTCTAGAAAACGGCAGAAGCCTCTGTTTGTCTT

TTCTAAGTCTGTGCCTTTCCCCTGCTGGGTCCCCCAGCTCCCACCCTGTGAAGTCCACCTCAATC  
TGCCCCTGATTTAATGTTGCAATCCACcgaggccttcttatgcttcacatctctctgacttctgc  
atctg

>chr22\_36725054\_36725254

CTTCTGCCCCTGGTCATTCAGGAGGGAAAAGGAAGCCCAGACAGAAAGAAGAAAAACAAACCT  
CACACCCAACACCAATGGCAGCTGCCCCTGCCCTGGGCCGAGCTTCCTCCCAGCCCCCTAAGCA  
TCAACGGGGTGGGGGCGCAGAGGGGCTGGGTCACTCTCATTCAAAACACACCCCACACCCTGCT  
CTCTG

>chr22\_36725254\_36725454

ATGTGAAACTACTCAGGAGGCAAGCTCTAGGGGAGGCAAGCCTTACTCCCCCTTGCCTTTCTCA  
AAAAACACGAGTCCTTCAAGCTGCACAGCGAGGACAGAGATTAGAGACCTGCATCCTCGACTAG  
ACAGACGGGAAGACAGAAGGGAGGGAGGCGGCAGGAACCACAGCCTGGGGAAGACAGAGCAATTT  
CATTG

>chr22\_36725654\_36725854

TAAAAGGAAACATTCCCCAACCCCTCCAGAGGAACCGTTTTCCCAGGGCTGTCCCTAGGATGGCT  
GGAATTCCTCTAATTGTGTGAGGAGGAGTCAGAGGCTCTGCTGCTGAACAACAGGAAGCAGAGCC  
CCCAAACACACTCGAGGGCATGCACACAGAGGCGCACGCACGACAAGGGCATGGACACACACAT  
AGACA

>chr22\_36725854\_36726054

CGCAAGCATCTGTGCATACACAGTCACATATGGAGGTAGGTGTACAGAGGTACGTGTGCACAGAA  
ATACATGCGCACACACGTGTGCAAAGCcatatacatagatccacacaaggcacaagctgcacac  
gattcacagatgcatatccacaagcacaagtgcaaacacaggcagcgaaggcacatgtattcac  
aggtg

>chr22\_36726254\_36726454

TACCTTAAAGAAATCTGGATTTGTTCTGCCAGGAACATTCATCTGGACAAATGCTTTCTGAAAGG  
CAAACCTGCTGGGAGGCCTCCTCATTGCATCTCTTACCGCACTGCTTAGTATCCTAAATCCACCGG  
CCGGATGCACCACGAATCGTACCATGGCCCCATGCAACCGAAAAGGTCTTTCCAATGCTCAGGAA  
GGGTT

>chr20\_30307939\_30308139

GTTATCTGACCTCTATTGACTTGACCCCTTGCCTTTTACAAGAGCTGGCACAGACGAGTTGAAA  
TTGCAAAGAAATGCAAATGAGAGAGGGGGTGGGGTTCCAGGGCAAACCTCAGGAGGTCTCTTGCT  
CAGTGGTAAAGTGAAGTGCTGCCACACCCTAGGCCAGCCTATAGACAGTTGCATTCTTGACAT  
TCCTG

>chr20\_45946393\_45946593

GAGTAGGGCAACCAACCATGTGCTTAGCTGGGTCCCGGGCAAACCAGGACACATAGGTCAAGGCA  
TATGCTCTCATGGGCCAGGTTGCAAACGAcagagaggcaggatgccacagtgggtggggaatcagc  
tttctggcgtcaaatgcatgcagaacctggctgtgctctcccctgcagtgtgaccgtaaaaagg  
caact

>chr20\_45946993\_45947193

CAGAAGCAGAGGCCTGCTCTACAGCCCTTTTCGTAATCACCCAGTCCTCCCCTTGGCCTACTTCAA  
ACATGACCACACACTGCTGCTCCCCAGAAGCAGCAAAGCAGAGCATGGTTAATCACTTCAAAGC  
GTTTCCCAAAGACACAGAGCAGGTACCCAAACAGGCCTCCCTTCCCAGGAATATTTGGGGCCCT  
CCCCA

>chr20\_45947193\_45947393

ACCAGTAATTACATCATAAAGAGACAAAAGTCCGGAATTTCCCTCCTGGCAGAGCATAGAAGTAAG  
AAATCAGGAGCAAAGGTTGGGGTGGGGAGGAAGCAAAATGTCCCTCGCAGCAGAGAATGCCTAA  
GCCAGGAGGAACCTTGTAATGAAAACCGCTCGCATTAGCAAATGATTATTTCCCTCCAACGCTGAC  
CGTCT

>chr20\_45947393\_45947593

CTTAGACCCACAGAACTCGAGGACCGGTCTGCACCCTGGCTGACTTGGGCCTGCCAGAGCTGCC  
GGGCTGAGCCCTCTCCTCCAGAGGACTGCACTGGCCTGAACTGTGCTTATAAAGAATCTCTGCAA  
ATCAACAGGAACCTTCTCATCCAGAGCCGGGATAGGGAGGGCTGGAATGGAAATGAGGCTGTGGAA  
TGAAA

>chr20\_45978393\_45978593

ACAGTTAACTTCAAAGGAACAAATAGCAACCTTGATCTTTTCTAGCAACTAGAATTCTGTTTCCC  
TCTCTAGCATGAAGTATGTGAAATCTAAACTTCTTGAAACCGATCCCATATTTTGAGTAATAGA  
GAAAACGCTAATCTGTGATCCAACCTGAAATCTACAGTGGTGAGGGAAACAATTATGCAGAACTGA  
GCCAA

>chr20\_45987793\_45987993

CTGTTTGTCTGCGGGTGTGCTTTGAGGGGAACAAACAGGACTGTGGGGTTGGTGGCAGATCT  
CCCATGCAGCTAAGTCCACGAACCAATGAGGAAATAAAAATATGCCGCTGGTGTGCGTGGTGGATT  
TTAACCTGGGATTAAAGCTTGTTCATAAGCAGCTACAGCATCCTCCCCGCTCCCTCCCTCTCT  
CTGAT

>chr20\_48782193\_48782393

tgattdtgactcccaggggacatttggcaatgtctgagaaaattdtggtgtcacaactggagg  
tggtgatttactggcatctattgggtagaagccacggatgctgctaacaatcctacagaggacgg  
tcccccgctgcctgacaacaagaatgacccagtcaggatgtcaatggggccaaggtagaaa  
tcctg

>chr20\_48782393\_48782593

ACCTGTAAGTAACTGAAGAGGCATGCCTTTTTCTGTTGCAATGGAGCTCCCGTGGATCTACAAT  
TCACCCAGCAATTCATTTCCCCCACCTATGTCACAAAATCCCACCTCTGTAGGCACAGGGAG  
GTCCAGCCAAGTGTGTTTAGGATCGCTGGAACTGGAACCAACCTGCATGCCCGTTAGGAGGAGA  
CAGAT

>chr20\_49434793\_49434993

AAGAGTTTTGCAGCCTGGCTGACCTGGTGAGTGGCTGCCTGGAAGGCGTGGGTTTAGGCCAGGC  
CAGACTTCAGGCCCTTGTGAGTTTTCTGCGGAAGCCATTTGGTGGTGGTGGTGGTGGTGGTGGT  
GGAATGGGGCAGCGCCAGCGCTGAGAGGAAAGCCACGTGCAAACActccctcctctctctctct  
ctcgc

>chr21\_45148172\_45148372

TTGATCAGGGTGAAGCAGTCACATGATCTCTCCTGTCCCTTTCCCTCATTCTGGTTTCCTAAAGT  
GGTCAGAGGTCTCTGCAAAATAAGCTAAAGGGAGGGTTCTGCTGGGTGGTGGCTTCGGCTTCTG  
TGCAGCGCTCACCTGCTCTCCCTGGAACGCCTGGAACCTAGGGTGGTTCAGGCTGGGGTGGAGGA  
GCTCC

>chr7\_44679875\_44680075

TTATTAATACCCTGCCTGGTACTGCTGTGTGTAAATTTGCCTGAGCCCACATCTCTCCAGTGG  
GAATATGATTGACATTCAGGTGCTCTAAGTAAGTTGAAAAGCCCACAGAGAGCCTCAGTAAAA  
GTTAGCTATACCTATCCCTGCTGCTATTGGTGGGTTTTTTTTGTTTTGTTTTGTTTTACTATTTT  
AATTG

>chr7\_100143064\_100143264  
ACACATACAAGTGGCTTCAGCTGCCAAATAATTCAGAATACTTCATATGCCCTTTAGGTGCCCTG  
TGAAAAAGAACTGAAGTGGATAAAGACAACCTGACTGGCTGGAGGCTTGAGTCTAGTAATAAT  
GTACTTTCCATTGGAAAACTTACTCTATTCTGAGAAAAATAAATTGATCTCTGTTCTCCCCAGC  
ACTTC

>chr6\_7146601\_7146801  
AGCAGGAGATGGGAGGGGAGGAGGCGAGGTGGGGACGGAGAAGGAAGTGTGTGCACACGCAGACA  
GCCTGGGAGGGCAGTGAGGTGGAGTCACTGCAACTCGGTGCCAGCAAGTCAGGAGACATTACTGC  
TGGAAGTATCCACAGTTAGCTCTGACTTAGGGGACGTCTTGTGGCCATAAATGTGGAGGAACCGA  
GCTCT

>chr6\_7147401\_7147601  
GACTGCCAGGGCAAGACATGCAGCTTCTGCAGAACTCATGGCAGCCGTTTTTCCACTTGCCGAGC  
TGGGTCTGTGAAGCAGAGAGGAATCAGTAATAGGAAAGAAAATGTAGTTGTTTTTTTCCCCCTTAG  
AATACCTACCATACTGCATTTTCAGCTTGGAGTGCAGCAGCATGAGGCATTTGTGGTTCAGAAAAGA  
GGTCT

>chr6\_34625222\_34625422  
TTCACACCTTTCCAACCTATCCACAGTCAAAGCTTATTTGTATGTGTATTATACAGGTAATTCA  
GCCAGAGAAAGATTAAGAAACATTTTTAAACCCCAAACCTGAACTGAAAGCAGCGAACTGGAATC  
CTGGCAGGAAGCTGGAGAGGATGACAAAGCAAATTCATTTCCAAGTACAAGGCAGAAAGTGGAC  
TTTAG

>chr6\_34625422\_34625622  
CCCGAGTGATCTAACCCATCAAGCAGGTACACAGCTACAAATGTGGGGTACACAGCTTCTCAGAG  
TTCAGAGAATTTAAATTAAGTGGCCACTAGGCTGAGCAACAGCAGGCATAGACCAAACAGCTCCA  
ATTCAGTGTGAGAAAGTAGACATGATAGCAGGTATTCCTGTTCAAACAACATACTCAGCTATTA  
TTAGC

>chr5\_180668794\_180668994  
GAAGAGCCAAGTGACAGAGAATCCCTTCAGAATTGCAGGACATGTCCTCACTCCCCTTGGGGAT  
TGGCTGACAATGCCATCTGTCAATCACCAGGACCCTCTAATTCCACCTGCCAATTACCTGAGCTTT  
CAAGGTAAAACATGTTCAAACCTGCTGCCACTCAGAACTTTTGCACCTGGCAAAAATGTTTCAGCC  
ACACT

>chr3\_141086910\_141087110  
TTCCGCATCTCTTTCAATACCACTGCAACTCCTTGAGTAAGGTGGGCACCACACAGAAGAAGGGG  
GATGGCAGAGGGGCAGTGAGAGGTCCCCAGGGAAACACCCCTCTTCTTCTTCCCTGCTTCTCTGAC  
AGAGCACGGCCATGCCTCTGCCATGCAGGAGGGTGATGTCTTTGGGGAGGCCTTGTGAAATCTG  
TCTGG

>chr3\_156807106\_156807306  
GTTTCTTGGCAGCACGTTGGGGACACTGCGCCATGAGAAcagagccacagaatgtaaagcaca  
gcctccttcgagggcatttgcataatgcctcccgtttacagatgaggaaattgaggcccaaagag  
gtgatgggaaagcccaaagctgcatttctggcttctggcagctgggaccagatccagctcgtat  
tgacA

>chr3\_171858506\_171858706  
CATGAGGCTGGGTTACGTCAATACCAAACCTATGTTGCTTTCCTAGGAGGTTTTAAGTCCCTCTCA  
AGGGAGGTACTCAGGGTATATGCTGCTTCCCTGCCTTTCTCCTTCTCCTGTCTCAGTTATCTTGA  
TTTTTATGTTTATTCTTATATTTACATAAGAACGGAATGTTAAACCCTTAGATAAAAACCTGTCACC

CAATG

>chr3\_177078106\_177078306

TATCGATACATGCTTCATTTTGCCTTCGGGTGCACTTATAAATCATCCTTAAGTGACCTCTATTT  
CTACCAAAGACATCCACTTGGTCTTTAAGAAGCATTCTTAGTGATCCTCACAAAGGAAAAAAAAA  
AAAAGGAGATATCTTCTGTGACAGGAAGCCAAAGGCTGATTTTCTTTTTTTTTTTTTTTGAGACTC  
TTGGA

>chr2\_26981096\_26981296

gcctagtaggtctcagtcttattttaccagcccctattcaagatagagttgctctcgttcaaat  
gcttctgacGATTCCTCTGTATTTTTTTCAGAATTCCTGTCTCTTTGGGCCCTGATACCTTAGCC  
TGGGGCTCACTGCTACCTGGAAGCACTAATGCAATCCTAGTTTTCTCCCCTAAAGCCCATTCTAG  
CCAGG

>chr2\_43448296\_43448496

TTGGCCTCGGGCTTCCTCTCCCCTGCTGCTGAGGCCTTCAGTCAGGGGCTGGCATCTGGGAGAAC  
CTTGAAACTGTTTCCCATCCCCTTTGGCAGCAAGCAACAAGCACCAAACGCTCCAGTTAACACC  
AGTGCAATCATCGTTAACGTGAAACAGCTGCCCGAGGCCTGGCGTATCCACCAGACCGCCCCCTC  
CCCTC

>chr2\_70312896\_70313096

TCTAGACTAAAAATGAACACTTAATTGTGGTAAACTATTAATAAGATTACACGGCCAACCTGTCCT  
ATGAAAAAGTCAGAGGCACTGTAGTCTCTTCGTAGCTCTCGTTCTCTCCAGCACAAACAGCCCATG  
CTAGGAAGTCTAGAAAAGCAGTAACTTATCTCATTCCTTAAATTAACAGAGTTTTCTAAATGCT  
TTGGT

>chr2\_70313296\_70313496

CGGAGGTGGAAGGCCCGGGGAGGAAGAGGGGTGCATTCTAGAGCTTTCGGGCCGACCCCAATTT  
CTCGTTGGCGACGAATGCTAACCACGTGTCGCCATTTTGTGTTTCAGGAAACATGGCGGCCGCCCC  
AAGGGTAAGGAACAGGGGAGGCGGAGTAGCGCCACGTTAGCCGCTTTCCTGAGAGATTGTGAAG  
CACGT

>chr2\_70370496\_70370696

ggctcagagtcagcccaaggccgcgcataaaagagtgccagactggggtttcaaaccaggcTC  
TAAACTGTGAACCTGCAAGATGGTGGGAGTGGGGAAGACAGTGAAAAGTTGTGCAGGGAATTCAC  
AGAACTACAGAACCCACTTTGTACTTCTGGAAGTCTGAGTGGGGAAGTAGTTCTAAGGAACAAG  
GTTAG

>chr2\_87785685\_87785885

GGCGTCTGGCCAGGAGCAGGGGCTGGGGACAGCAAGTGTGAAACCAGCTGAAGCACCTGCAGCTC  
AGGCGGGCTGCAGGCTCCCTGCTCTCCCCCTGTGAAGAAGCACACATTGTTCTTTCTTCCCGCAC  
ATTTGAATCTCTCAGTGGGGTCTCATTTTCTGTGACATGGCAAACCTCAAAAAATGGGAGTAAAT  
CATTT

>chr1\_10447813\_10448013

TGCATAGAGGGCTGTTCTTGTAAGACTTGTGCTCATGCTTTGATTTGGGATTTGGGGAGTTAGGG  
CAAGCCAGAAAGTTTTTCTGGTGGATAATAATGTGGGTTGACTTTCTTAAGCATTTAAGCCAAG  
CACTTGAGTTTCTAACAACTAAAAAGCTAAGTCAGCCTGACACAGCTCTAGCGCGCCCTGGCTTG  
ATTCT

>chr1\_23882413\_23882613

aagataaaatagtctggaacctggcaGGCACTTCCATAGGTGATTATGACAGAAGACACTATCCT  
CTCTGGGAGTTATCTGACCTAGGGCCAAATTGCTTTCCTCTCTAATGACTAATGGATTGGCATG



CTGGTCTTTCTTTTGTCTGGCCACCTGAACAACCTCAGTCCTGGGAGTCCTGACAGGCAATTTCC  
TTGGA

>chr1\_23882813\_23883013

AACATGCTGTGGCAGAAAAGGGTATAAGACGTTGAGCTCAATGCCTGGCTCTACTGCAGTTCATG  
GTGTAATGTGGGGCCTAGGACCTCAGAACCGCTGCCTTAGAATCAGCTTCtttacagatgcaga  
aactggggctcaagagaggcaaagtccctagcctgaagttatacaggttaagaggtgacagagcag  
ggatt

>chr1\_23883013\_23883213

tatgtccctttatggctcgtctctaaagccAGCACAGCACACCTAAAAACAATCCAAGATAGACC  
CAACCCAGGCCTTGTAGGTGGTTTGGGGCAAGGGTTCCCTCACATGAGGATTGAAGTCTGCTATTG  
CTCTGCACTGtgtgtgtatTTTTTTtaagagagtgttcataatcttccttcagatcagagtgaccag  
gacac

>chr1\_27113013\_27113213

AGATTTTTGAGAGAATTTGATGTGGACAGAGGGAACCCCTGAGAATGCATGTCTTTTTTCCCCTTG  
TGAATTTACAGAGCAAGGACAGTTCATTTCTCAGTTTTGTCTTTGCAGAGAGAGTGCTGCTTGGA  
GCCTCATGGTGGACTTCTAGAGATTCAGTCCACAGCCTTAGGCCCCAGTCACAAGTGTGTCCCCA  
GGCTT

>chr1\_28835213\_28835413

ctacagcttcccagagtcctgtggacaatgactggggagacaaacctatgcaggaaacaTATCTAG  
TATACTAGATTTTAAGTTGAAGTAGGATCTTCAGGAGTCTAATCATTATTTCTTTTTCTTTTAGGA  
GAGAAGACGATCTGCACTTCGCATTTTGGCATTGACATTTAATTTTAGGGTCCTTTATATAGAAG  
GGAGA

>chr1\_32644813\_32645013

tttggagaaggacattgaggcccagagagagaacagaacgtccagccacacagcaaatccgtga  
tgaagttgggactggagtatgggtctcctgagtctcagcccaggactctatcCCTCTTCCCAGAT  
CCTCGGAGTTCCCGATGGAGTCACATTTGTTACGGCCAGGGAGGAAGGTTTGATGGAGGCCTG  
CAGGA

>chr1\_36840413\_36840613

TGGCCTGCTCTGGCTCATTGGACTAGAAGAGGAGATTGCAACAAGGGAGGTCTGGCATGGGCA  
TGTGACTAAGAGTCCCTTCAGCTCCAACCATCAGTTGTTGCTTTGTGCAGTGACTCAGTCCCTGGA  
ATAAGGCCTGCCATGGGGTCCCATGTGGAGTTCAAGTTCTTACCACCCATGATAGCCCAAATCAG  
GCAAG

>chr1\_37943613\_37943813

CAGTGCTCCAAGATACTAGCCTAGGATCATGTGCCCGGAGGGAGGCAGGTGGGCGGATACATGCG  
CACACTGCATACCTGAGACAAGGAGCCAGGCCTGGGATGACCCAGCTGCCATGGTTTTGAGAGGC  
AGGCCAGAAGGCCCAAGGAAGGGGGgtgatgtgatgggggaagcactgggcattgtgaagacaca  
gacca

>chr1\_38465413\_38465613

CCAGCGTCTAGCCTCCACTGTCCCGACTGTCCCCAGCGTGGGAGAAGCAGGGGCAGGGAGCCACC  
CCACTCTACTCCTTATGAGCAGTACTCCCACCCTCTCCTGACTCCCAGGAAGGGACTTTAGGAAT  
ATGGATAAAGGAACCCTTAACCAGAGCTCTGGAGTACAGAACTTAGAGACGGGAATGGGCTGTGC  
CTGCC

>chr1\_38465813\_38466013

CTCATCCCCCACCCCCGCTGTGTACACCAGCTTGGACAGCCTTGGCCTGTAACATCTGCAGCA

GCTGTGGCGGCACAGATGGCCAGATGTCAGGTTTTGCCAGCAATGGGGAGAAAAAGGAAAATGA  
AGTGTGCGGGGAGGCAGAGGGGAAGTGGAGACAGACTGGGAGTGCAGTGTACCCCTGCCACCTC  
CTGCT

>chr1\_38466013\_38466213

AACATCTGGCAAACCCCAGGATCTTCCATCCCCTGGGGTCATGATTTCCCTCCTACTGCCTCT  
GGGAGAGAAGGTCTCTCCACCTTTCCGATTTCTCAGGGTTTGGGACTAGGGAGCTGAAAGGAG  
AGAGAGCAAGAGCCACTGAAGACATTTTCTCCCAATCAGGCCCATCTTGGGTGGGAGTAGGA  
CAAGG

>chr1\_45272413\_45272613

CTCAGTGATGTCAAGGGTTTTTACCTTCTACCCCTTCTTACCTGTGTTTTAGAACAAGTGGATC  
AGATAGTCCCAGGCTGCCTGGGTTCCCTAGGTGCTGAGAAGGTTAAAGGCTGTTAGACACATGAGC  
AGGGGACAGGAGGCTGCTAGGACTGGGATCCTCGGCTAGTCCTTGCCGACTGAGCTCCTTCTCTG  
GGCAC

>chr1\_45273613\_45273813

GAGGCCACTGGCTCAGCTGGTAGGCACCAGGCCTTATAAAGTGGCAGTGAAGTCCGGCAGTGAACC  
CCGAGTCCAGCCTCGTGACCTTTGCTGACCCAAGTGTCTGGGGCTTGTCCCTAGCTGGCTACAC  
CTCTAGTACCTAGGTTTCCCAAGTTACATTTAGAGATGGCAGAGGCTGTGACACCTCTGCCA  
GGGCT

>chr1\_90372412\_90372612

CCAGGCTGCATATAGTTTTGCTTTTCCCTGTTTCGTTGCATTCCAACCTGTCAACGGCTATTTTCTGA  
AGGTCTGTGGGGCTCATGTAGAAAAGGaataggtctgggtggaggccaagaatctgaatttgta  
tcatgtaccctagctcatcttaattcaagtgttagtctgTAAGAAACAGAAGAATGGGTAACCTCA  
ACTCC

>chr1\_110546677\_110546877

CTGGTATTGCCTCACCTCTTCTCGCCGCGAGCATTGACAGAAGATCTAGTTGAGTCCTACTTTGA  
AAGGAGTATTGCTTCTGACTGTGGAATTGGATTCTAGCTGTGTGTGTGTTATATCCTGTTACTGT  
TGAGACACAGAGGCGGGAGTCCGGCGGGGAAGATATGTGCTGAGATTAGTCAGCCTGCCCTCCCT  
CTCCC

>chr1\_145455843\_145456043

CAAAAATAGCTGTAATCATTTTTTGTAAATAAGGACAAGATCAAGGTCAAGTGTGGGAAAGACAG  
GACCTATGTCCTTGTGAACATGTGTGAACAGACACAATCATGTCCTTGTGGCCTGAGGACCAGAG  
GCTCAGAAGTCAGCTGTACTGCAGGGGGCGTAGGCTGTTCTCTACAATTTACTTTGCATTGCCCT  
ACAGA

>chr1\_150536576\_150536776

CTAGGCTAAAAGGCCCTCCCCTTGATGAGACAGGCAGAGATCATCTCCCCTGGAACAAGGTACC  
CTTCTCTCTCCCATCGCTACATTCTCTCCTTACTGTTGACTATTGGTTGCCTGCCTCTTT  
CATCACAAAATGAGACTCCTCTTTAGCTTTAGTAGaggggtgggcaacttttctctacaggag  
tagat

>chr1\_150540976\_150541176

ATAGCAATAGTTGAGTCTCCACGGGAACAGGATCAGGGAGAGTGAAGCCACCATTGAGTATCT  
TAGGGTTCCAGTTAAATAACTTTTGGGAAGCTCTTATTAATAATCTGTTCTGCAGACAGCATAGTG  
CTCTTAGGCAAAACCTTGGTTCCCTTCCCTGACTATGTAAAACCTAGAGGGTGAAGGACCAGTGA  
GGCTC

>chr1\_150541376\_150541576

ATACCCAGTCCAGACTTATTTAGACCAAAGAGCCTTTTTTTCCTATCAGTGTTTTCCAAAtttta  
tcttaagaggcagggctcttggtatggtgcccacatgctggagagcagtggtattcacaggtgcaat  
tctactactgaggagcacaggagttttaaccagctctatttccaacctaggcaggttcaccacct  
cttgg

>chr1\_154943576\_154943776

CAGAGGCAGCTGGGGGTGGAAAAGGGAGGAGATCTCAGAGCTCAGCATTTCCTTCCTGTCCTGG  
TTGGACACTCGAATTCCCCCACCCTCTCTATGCCCGAAAAGCTGGCTGGCCCCAGCCCAGGCCACC  
CCCAACCGCTACCCCATACAGTAAGCCTGGGCCATTAGCATCCTCTGCTACAGCAGCTGTGGACT  
GGAGC

>chr1\_154943976\_154944176

CTCATAGCCAAGCACTGTCTCTCCCTTTCCACAGGGCTTGTTAACACAGCACACTGTCAAG  
GGTGAGAATGAGGCAATCAGGTCCCCACTCCCACTCCAAACCACCCCAATTCACATCCCTCCTCT  
TACAGGGCCCTAAGCCCCACCAAAGAGCACAGCATCCTTCACACCAGGGAAGGAGCCTGGCTGGA  
GGAGG

>chr1\_155953376\_155953576

TACGACCTCTCTGCTGTTTTGGAGAAGGCCTCTGGGCCTAAAGCCAATAAGGACTGAATTCCTG  
GGATTTTCATCAGCCCCATCCCATGAGCTAATCCCAAACCCAGAGCCAGGAGGATGTGTCAGCTAG  
AGATTTTCAGGACCACAAAGCAGAGCCTGATATCTTAAAGGGACCATTACTTGCTTACACATCCA  
CACTG

>chr1\_156075176\_156075376

GGAGACCCAGCCATCCCTACTCTACTTGGCAGCCCCCTCCCCACTCCTCCTGAGAGTGCCCCCT  
TGCTCCACCCAGCGGCCAGGAAATCTCCTGCAGATTCACCACCACCCTCCTGGCTGGGAGTTCA  
CTTTCCTAGTTGACCTCCTGGCCTGAGGGCCAGAGGAGAGCTTTCACCGGGGACCTTGAGGAGTG  
TGAGG

>chr1\_156092776\_156092976

GGAATAATTCTGGCTGAGATCCAGGCCCGGCAGGGGCGCTGAGTCATGGTAGAGGGCAGAGTGG  
AGAGTGAGCAGGAGACCCTAAGCTTGTCCAGTCAGAAAAGCAGAGGCTGAGGGGTGGCCTTTTCT  
TGAGAACTACATTCAAGTTGCAGCAAGAAGGACAGTGGTCTGAATTTGACGGGGACAAATGGAAG  
GGAGA

>chr1\_156096376\_156096576

CTGGGGAGCCGGACTTCCTTGTCCACCAGGCACAGCTCTTCAGACCCCTGCCTTGGGTCACATT  
TGCAAGTGCCAACTCTCATTTCTACCTTATTCTTTTCTCCTCTCTGTTCCCCTCCCCACCCCTCTC  
TTCCCTCTTTCTGAGATCAGATTTGCCAGTGATGGGAAGAGTTAGAAACAGGATGCCCAGCCCTT  
CTCGC

>chr1\_161171576\_161171776

GGCGGCCTTGGCATCCTATTCTTTTTGTTTTGGTTTTGGCGGGAGCTCTCAGACCCGCCAGCCC  
CACTTAGGCTCCTTTCTCCAATCTCAATTTATGACATCTGAAATTAGCTGGCTTTCCCAACTCC  
TGTCTTTTGGATTAGTGATGGGAAAGTAATTGGCAAAGCCTGGGGCTACCCTATAAGGGCAGGG  
CTCAG

>chr9\_35728600\_35728800

ATCTCAATCACACAGCCCCACACAGATCCCATCACGACTGCATTATCTTCTCCTAGGGAGCCCA  
TCCTATGCACACAGCTTTTGCACAGATAACCTCCATAACAAGCACACCCGGCACCCAGTGTCTCT  
CCTCCATTATGTAGACATTCtccattcaccagcaagcattccttgagggccagctgtggggaa  
gacct

>chr9\_130834379\_130834579

TTACCTGTAAAGGAGCACAAAGTTAGTCCTGTGGGGAACGTTTGAAGTCTTGGAGAGAAGATCTGC  
CTTTTTGTAAATAACTGGGCAACAGGAAGACATCCTGCCTCTTGTACCCCCATACTACTTCCTGT  
TGAATTAGCATTAGTATTAAGTGCCTACAGAAAAAGCAGTGCTGAGGCTTTGCAGAACTAGCAGG  
AGCCG

>chr9\_131901579\_131901779

GAAATCTCAAAGTAGCCACTAGGTGGCAGGAGAGGCACACTGAACTTGGAGAGGGTTTGGTGACA  
TTTTATTTGAGGCAGCAGAAGGAACAGGGAGGGGAGGGCGTGCCTAGAGTTGTTGGCTGTTCCGCA  
CCTTCTCCACAGGTCCGGGTTTTCACTTTGGGTCTAGGCTCTTGGGCATGGTGTCAACAGTAGA  
CCCTA

>chr9\_131901779\_131901979

GGAGGAGTGTGCCAGGAGCCGGGGTGGCTGCAGCAAGGGCCCATCTTGCCACGTGGCCGCTGGT  
TGCAGCACACGTTGTGTTGGTTCTCCAGAGCGCCCACCTCTTCCACCTCGGAGCAGTGAGCAGC  
ATTTTGCAGTCCCTAGTTGGTGAGTGGCCTGGCCTAGCTCACTGGGGACCTGGAGGCTTGCATGG  
AGTTC

>chr9\_136216179\_136216379

GTAATTCGTGGCACCTTGGCTTCTTGTAGATGAGGAAAAGCATCGTGCTCTTTGTTCTCAGGTG  
TTTGTGTGCAGATGATGTAAGAATATTTGCTATCTGAGAGATGGTGATGACATTTTAAACCAC  
CAAGATCGCTGATGCACCAACACCCTTCTAGTGGCCCCAGACATGAACTTGACATGGAATTTGA  
GCCTC

>chr12\_6444739\_6444939

TGCCAGCTTCATTTCTGGTTTTCCCTGGGCTTCATTTTTTTTTTCTACTATAAGAGACACTTTGT  
GTAAAGATAAGAGGGTGTCTCAATGTCTGTTAAACACTGGGGAGCAACTGACTCACCAGATCAC  
AGAAACCCTAGGGCAGGGAAGGAGGGTCAGGCAGCCCACAGCCACCCAGCCTCACCAACTCCACA  
TTTCG

>chr12\_6446739\_6446939

TGAGATCCCATCTCCCTCCCGTGAAGCCACCATTGACGATGTCTGTTTCCCTCCACCCCGGCTCCT  
TAGACCCATAGTCCCTGTGAACTCGAAGCACGTGAACTGACCCTATCTACTTTTGGCTCTTATCA  
TAATATGGTTATGTTGGGTGACAGATATGATCTCCCCAAAGTGACCACGAACCTTATAAGATGAG  
AGATC

>chr12\_6641139\_6641339

TGTCTTTGTTTCATCTTTCACATTAGCCCAGTTTCATGCAGCAGAGAGAGGGTTATCAGTGAGA  
GAGAGATGAGTGAGCCCAGAGTCCTAGGGCCTGTCCCGGGATGGCAGATGAGCTTCTGCCCGT  
CACTGCCACCTTTCCCCTCTCAACCTCTGGACCCTGCACAGTGACCAGACAGCCTCTCTGGGGAG  
AATTA

>chr12\_6641539\_6641739

cccacaatgtcaatagcgtcacagttgagaaaacctgCTCTAGACCAAGGGTTGCTTTCTGCCGT  
GTGCCCTACCCCACTCGTGTCCCTAATCCCATCTCCAAAGGTTGGCAGCAGACCGGCC  
CAGGCTCGTGGAAGTTCAGATCATGATCCCCTCCAGCTCTGCAGGAGACAAGACCTGTCTCCAG  
CATTC

>chr12\_31902133\_31902333

atccacctcaccaagaattcagaggctaaggTTTTAAGGATGATTTGGCAGGTAGGGCATTAGG  
aaacagatgTTGTGGATTGGTTGGGGATGAAATCATAGGAGTGTGAAACTGTCTCATGTGCT  
gagtcatttctgcaggggagtggtcagaggaccggttgagtcagttcctttgttcagtcacgg

tcact

>chr12\_45628133\_45628333

AGGAGTTCATGTGTAATAATTTATTTCTCCAGAAGGTCACCTTTTTTTCCTACTGATTTTTTTTTTA  
CTGGTAAAAATATTGCAAACAGATATTGTTAGTCTCGTTTGGTAACTGAAAGAGCTCTGAGAACG  
GAAAAGTTAGAGTGACCTATCCAAATGAAGGAGCAGTTCAGTGTGGTGCAGGATATTAGATTCC  
AAAAAT

>chr12\_45629133\_45629333

GTCTGTTCTAAGTAGGGCTGTGAATAAGAGTGGGGTACAGTTTCCTGCAATAAGAGATGGGAGGC  
TTAACTTCAGCTTGGCACGTAAGAAAGATCAAATGTTTACTGCAATGTGGGAAAACCACCTCCTG  
GGCATAATAGAAATCCAGGCCTGGCAGTAAACAATTCTATTCAAAGCAGCTTCTCAGGGCTGAG  
GAATG

>chr12\_46776333\_46776533

GACTGATTAAGGCACCTGCCTCCGGTTCATGTCACTTCGTCTTGGGACACGTGGCGCTAATGCC  
ACTTTTCAACCCCCACCCCATTCAGCGACATTAACCCGGGCGACAGTCCAGGGCTAAACAGTTG  
CTGAAACAGTTAAATGTGTGTTTTATTGAGGTGAACCACGTACACAACAACCCCTTTGAGTGAA  
ACAAT

>chr12\_76338333\_76338533

AGAGGGAAATGAACAAGTGAGATTAACAGGCAGATGAGATGATACAAAGCAAGCACAGGTCCAGC  
CAGGGTTAACCTGACACAAAGGAATCTGAATAACAAGAAGCCTTTGAATGACTCAGGTAAGGTTT  
ATCTCCTCCAAAAGGAAGTTAACACCATGTTACTCACAGTAGCAAATTACTCATGAACCTTTGGA  
GGAAG

>chr12\_76338533\_76338733

TCTCAGAGAAGGCTATGGTCAGAAAATGGAAAAGGAAACAAGCCACAGGCTCATCTTCAGATGAG  
GACTCTGCACAGGGCTTGACCTTTCAATCGAAGAACAACCACAGTAGTATTCTGAGATGGCCAAG  
TGTATGGGAAAGTGACTGCTTCTCTCCCACTCCAATGTCTACTGTAAGTCTTGTTTCAGCCCCGAG  
ACAGA

>chr12\_109231871\_109232071

GTTATTTTTTAAATCTCCACTTAATTCGATTTTTGGTAAAAACACGACCTGTAATTTTTCTTTATCG  
GTAGGTAATAAAAGCTTCAGATGATTTTACTGATCACTGGTATGGGCATATTTTCATGACTTTGCC  
CTTTCATCTCTTGATAGTTTTACCCTCACCAAGCAAGACCTTCCCTGCCTCAGCACTGTTTGCC  
CTCTT

>chr12\_122884647\_122884847

CTCCTCGGCTTGAGCCACTGAAAACACTTACACAACGCTGGGACCTTTCCAAATTGACTTGTTC  
CCCTTAAGAAAGGGCAAGCTATTTGATTTTCTTCCCTTCCACTTCATTCACATTCATATTTCTGTA  
TATACAGAAGAGACTGAAAAAGATAAATAAGATTGAAGGGCATTGCAAATTTTCTTCAATTCTT  
GAGTA

>chr12\_125402447\_125402647

TAACCTATTTGGGCTTTGTTTGTGTCGTCGTTTGGTTTTGTCTTAAaattgtggtaaaatacaca  
taaaatttaccattcttaagtgtacatttctgtagcatgaagtacattcagattgtgcatcagc  
catcaccaccaagccatttctggagctcttttctgtcttgcaaaacaaactctgtcccatgaaa  
actga

>chr11\_6627624\_6627824

CCATTAGGTTCTACACTATTTCTCTTTAATACTTTGCAAAGTCATTTGTTCCATTTTTTCATATAA  
TTCTCAAAGGGTACCCTGATAAAGACAGTAAGCACTGTTACTGTTTTGTTGGTGAGGAAATAGAG

GCTTAGGCAGTTGCCAGTGGGCCTAGCAtctaggaagactctagctgagctctaggaagactcta  
ggaag

>chr11\_46575824\_46576024

taaaaaataaaaaaaaaCCGACCTTCCGACCTCCTGTTACTCAAGAGGAACAATAAAATACAGGTC  
ACAAGTACTGTATGACTCAGAAAACCTGTGATGCAACCTCAGATTCCTACAGGATTCAGAAAGGGG  
AAAGAGTAGCTACAAATATCAATACCAAGAAAAAATCAAAGGATCAGGATTACCAAACAACATT  
TCTAT

>chr11\_46576024\_46576224

CAATTTCCAGGGACCTAAACACACTAACAGCTCAAACAAGAGAAAGCTTTACTGATGGGAAGAAG  
TCAGAGGGAGTAAAACAATTACACAATCTCTCTTTTCATCTGAAGAAAAATATTTGCTGTTGCTTT  
AAAAGGATAAGGGACTTCTCTCCTGATATGCTCTTACCAGCCACCTGAGAAGAGATTTTACTCTG  
TTCCC

>chr11\_61739024\_61739224

TGGCTAAACATGCATGTAGCTGCAGTGAACATCGCAGCAAGACTGAGGGACAGCTTGTGCTGTAG  
AAGGTCATTGGGAGGAGGCTGGCTGGGAACAATGGAAGGGAAATCTATTGGTGGGGAGTGTGAG  
TGTGTGTGTGTTTATGATTGTTTATATGATTGCTTGTGTCCGTTCCCTACTTTCTGGTAACTT  
GAGGT

>chr11\_61739224\_61739424

GTCAGAACTGCAATGTCTAAGCCTTTAGATTCTTCCGAAGCTGTGGCCTGGTCTTGGGACCTTTG  
TTGACCAGGGTTCTACCTCCCCACCCTCCAGCTCAGCTCCTCGTACTTGGAGGCAGCAGAGAG  
TTTGGCTGGTCTCCAGGACAGCCGCCTCCAGGGCCAGGAGTGGCGGGAGGGACCTCAGATGAG  
AGAAG

>chr11\_62320224\_62320424

TTTCCCTAAGCAATTCTCAAGCCCCAAACCCTTAACCCTAGCCGAAAATATAAAGCCAAGTAAAAT  
CATCCTTCCCCAGCTCAATTCAAATCCCAGCCTGTATTTAAACTTCAAGCTTCAAATAAGGAGTT  
CCTGAATTTCTTAGATCAGAGAGCTTTGATACACAGAACTCTCCAATTACACTCAGTCCTAATG  
AAATC

>chr11\_62389824\_62390024

ATCTTCACCTTATTCATCCATCCAGTCAGTCACGCCACCCAATAGCTGTTGCTCAATACTTATTA  
CACGAATGAAATCTAAGGCCACCACATGATCCTCTGGGTGTCTCTCCTGGAATCCTCACTATAA  
TACTTTGAGATAGATAAGAAACCAAAGTTGACAAAAATTATGTCATTGCCACAGGGCAGTTTTGT  
GTCCT

>chr11\_65187824\_65188024

TCTCCTTAAATACATTCCCTTTCCCGAGAAAAACGAGCTGTGTGGAACCTTGAGGCCAGCAAAGCT  
TCTACATAAGGACCCTCTGAAACAGTGCCCTTTTGTCTTGAACCCAGGGTGGCAAAGGCAGC  
TCCAGATACAAGGGCACAAAGGAGACTTGGTTCCCTTTGTGACAGGGAAGCCTATGCTTTACAGA  
ATCCT

>chr11\_65255224\_65255424

CCTGACCAGGGTGAATAACCAGGAGGCAGGCGCACGTGACCGTTTCCATGGTGACCTCCCTTAG  
CAACCCTGACTGGTCTGTTTATGAACGCTGGAAAATCCAACCAGCCTCTGTCTGATTTTTTTT  
ACCTACTCTGCCTCCGCTGCTCCAATGCAGGGGTGAAGTCACTGCCAACGTTTAAACCCTTTCCC  
CACGT

>chr11\_65255424\_65255624

GGGCCTGGCTCCAGTCAGATCGAGGGTCTGGGAGGGCTGCAGGGATCTCTCAGTCGCCAATGGTT

GCAGACAATCCAGTAAGCCACAGCTGTTACTTGCTGCACTGAACCCTGCCTGCGCTGAGTACCGA  
AAGCAGGAGGGAAGGTAGCCACATCTCTTGAGCCCCGGCGCTGTCCTAAGCTCCTGACATCCCCAC  
AGGCC

>chr11\_65255624\_65255824

TGAGAAAGGGGACCACAAACAGGAACCAGGCTGAGACTGAGCCTGTGGACCCTGGTAGCAAGGG  
CGCCCTCTCTAAGAAGCCCTCTGTCATGCTACCGATGTTGCAGAACACCTGGGGCGGAGTAGG  
GAGTGCCAAAGCGCAGGGGATGAGTGCACAGCAGGGAGACTTCTATGGTCTGCAGGTGAGCTGAA  
GGCAG

>chr11\_65255824\_65256024

CCCCCTGAGGAGGTGGACATTTAGGCTGAATGGAGGACAGGGAGGTAGCAGGACCTGCTGTCTCC  
AGGACCCCTAAGTTTCTAGGCCAGAGCTGACGGCTGGTGGGTGCAGTCAGCCAGGCTCCAGGGAA  
GGCTGCTCCAGGCAGGGCTGAGTCTTCACGGTTCAGCTTTTAGAACTGGCCAGGTTGGAATTCG  
GCTGG

>chr11\_65256024\_65256224

GGGCAGACAGGGAGGGCAAACCACAAACACTTCTGCCTGATCTGGCTGGGGAATCCACAGAGACC  
ACCAGCTGGGACTGGGGTGAGCCTCTCAGAGCCCCTAGCACCAGCCCAAGGCTGCATGGGCTGAC  
TGTGTGGGCGGATGCTGCCTAAGTCATGTGCAGAGCCGTCCTGAGCTGAGGCAGAACTATAAGAC  
ATGAA

>chr11\_65256224\_65256424

CTCTGTTTTCAAGACAGGTGACAATGACAAACAGCAATAAAAGCCACACACCATAGCTCAGGATA  
ACAAGGGCTGAGATGCGTTTTGGACAATGAGAAGAAAATAAAAAATTAACAAAAACAGCTGATTCAC  
CAAATGAAGGGCACAGTCCCAGGCGTCTGGTGACGTCCTGGGCAGGGAAGGCTGCAGGAATCT  
GCAGC

>chr11\_65257024\_65257224

GGAGGGCAAAGAGGAGGAGTAACAGCCTCCTCCGTCACAGCAGTACTCGAGTCACATCAGCTCAT  
CACCAATGTGCCTCCCCCAGAGTAAGGGCAGCAGGGGCGGAAGAAGCCAGGGGCACCTAAATAT  
TGTGGGTTTCAGCACTTCTGCTCTCCAGAAATGATCCAGGTCCACTGTTTTCTCAGGGGGAGTATT  
TTATA

>chr11\_65257224\_65257424

TGTCTATCTCTAGAAGCTTCCAAGGGGAAAAGTGACTTCAAGGGGAAAGAGGAGCTGGGAAGAC  
CTTGGCAGCTCCTTCCCCTTGCCCGGCCTTCCCTTTCCCTACTCTGGGCTCCAGGCTCCACCCAC  
CTCCTGTTAGGCCTTCTGAACAGCAGCAGCAGCTGGGAATGCAAATGACATCCCTATGTTGTC  
CCTGC

>chr11\_65257424\_65257624

CCTTTGTCCAGGGTGAGAGGGACCCTTCCCTCGGTGGAGTTGACACAGACCTGCCTCTCTCTCATG  
TCTGTACTGGGAGTGAGCCTGAGGCCTCCCTGCCAACCGGACTGGAACTCTGGAATCCCCTTTG  
TCCCCTTTGATCCTCAGAGGAGCGAGGGAGCCCTGTTAACAAACACATAGTCATCCGAGAAAATG  
TAGGC

>chr11\_71814752\_71814952

AGATGATCCAGATGACCAGTACCTAGTCGGGGAACACAGAGGGTGTATCGCCCAGCTGGGCTGGG  
GGTGAATACACAGAGGGTGTATTCTCCACCTGGGCTGGGGATCTGCGACTTACAGGAAGAAGGGA  
CCTTATACTACCTTCACATGCTGACGCGCAGCGGAGATAAATCCTGGTAGAGGAGATAGAagcca  
cctca

>chr11\_118782990\_118783190

GAGGTACGAGAAAGCAAAGGGATGGGGCTCTGGGAACACGTCACCGTGCCTCCCTCTTAGGGGGT  
TAGGTGGGGAGGGGTAGCAAGCTCACAAACAGGGAGCAGGTGCGAGTCACCTGAGTGGAAGGCCA  
GGCGCATACCAGGAGAATGAATCGGAGGAGCGGAAGAGGGCGGCTTGACAAAGGGCCTGAGATATC  
CATCC

>chr10\_76969594\_76969794

gggcctaatgcaggaggtcagtcctaaactaacggtctcccatatacattttatctaataGCTCTG  
TCACCCTTCCTGCACACCCGGGAACTCGGGTGCGGCATTCTAACGCCTGCTCAGCATGATTCCA  
CATTTTCTCCAGGCCATAATCCAGAGGAGGTTGGGCCCGGAGCAGGCTTGCTCGCCAAGCTCC  
GGCTC

>chr10\_103911210\_103911410

CCCATGAGGATCCTTATCTTTCTGAGCGGCATTAGTGGGAGGTAGCCAAGGGGTAGTGGGTAGG  
ATTGAAGGGATTGCTAACTGCTAATATCTGGAATGTGGCAGAACTTGAATTAACTTGGTAGGTC  
TGAGCATTGATACTGGAGTTACTCATGACAAAGGCATTGATACTGGAGTTACTCATGACAAAGGC  
AGAGT

>chr17\_7482476\_7482676

GCTCTGTGAATGACAATGCTGACTGGAGTGCTGCCCTCTGTAAAGGGCTGGGTGTGGATGGTCA  
CAAGCCCCTCACATGCCTCAGCCAAGAGGAAGTAGTACAGGGGTGAGCCAGAGGTCCAGGGGAA  
AGGAGTGGAACCGATTTCCCCACCAAGGGAGGGGCTGTACCTCAGCTGTTCCCATAGCTACTT  
GCCAC

>chr17\_17656075\_17656275

TCCTTCTTTCCGGCCGATTCCCTCACCCCCTCAGGAGGCTCTCCACACAGACCGTGACCTGCCCTG  
CCTGGCACTCCTCTGCCAGCGTTTATATCTCTTTTTGTGCACTctccgcccctcatcacacgtgt  
gcctcagggcagggccctgtctgtggcctggcacacagtaggtgctcggtttgtgttgaatg  
CCTCC

>chr17\_17744075\_17744275

AgccccctgccccctgccccctgcccTGGCCCTGCATATCCTTCACTGCTGTGGGAGCCAAGC  
TGGGACCTGCCAGGTTATGGCAGAGGGGCCAGGCTGTGGGAAGAGACTGCTCAGAGCCTGAGTC  
TCCCCCCCCACTTCTCCATCTGTATATAATGGGGTCAGATGACTGTTGACATGGGTGATTCTG  
GTCCT

>chr17\_27073473\_27073673

TGCCAGAGTCTTAGCTGTGCTTGCTGGACATTTTTCTTGCCCCAGCTTCTCTTCTTGTGTGT  
GTGGTGTAGTAGAGCCTGTCTGAGCTGTGGAGTCAGACACACATAGCCAGGTGCTGCTTACCTG  
TAAGCCTCTTCGTTTCATCTGTAAAATGGGGCATTCCACCCCTTCTCAGAGGCAGGTGGCAAGG  
GCCGG

>chr17\_27135274\_27135474

CCAACCATTTGATCTAGGAGAGAAATTAATAACAATGCCAGCCCAGGTTACCAAAAAGCTAAATTG  
TCCTGGATGAAGAGAGAACCATACATCATTCCAGTCCTTTATTTTGAGCCACTGAACAACACACA  
TGCATATCCAACAAGGATTCTTAAAGGACAGTATCATTAGAAAAGACAGCTCTGGCCTTCACTGAG  
AACAG

>chr17\_38267674\_38267874

GAGTGGCTCTTGGGTCCAAAGGGCTTCCCCTTGCCAAGTCCCACCCCAAAGCCCAGGAAGTCCA  
CAGCTTGGCGCCAGTCAAGGCAAAAACATTCTCAGGACTCTGACAGGCTGGGGGATGTTCCC  
ACCACGAGGATGGGGGAGGGGAAGGAAACACGCGGGGGAGGAAATGACCACAAAGAAGGGGGTGA  
GGGTA



>chr17\_38268074\_38268274

GTTGAGCTTGGGAGCCCCTGAGTGGCTAAAAGCTGGAATTGCAGTTGTGCTGGGGGAGGAGCCCA  
TCGGGtctccctctgcctctccacctccgcccctccctttccctctccctAAGCCCAGGACTCTG  
GAAATAGCACCTGGTAATGGGAGCGCTGACAGATGCTGAGTTATAGGAGAGCAAATGTCCCTGGCT  
AGAGT

>chr17\_62224468\_62224668

GCGTTCACTACATGGACATTCGATGAATGAAGGTGTCCCGAATTAACATTATACTAGACAATGAA  
GGGTGTAAACTGCAGCCCAGGAGCACCCTGCCCTACCCCTCAGTTACGAACTTTCCTGAGATT  
CTTTAAATGTGGGCTGAAGATAATGGCACATAGTTTGAAGGATGTAGTGAGGATGGCTTTGTAGC  
CTTAG

>chr17\_62224668\_62224868

GACTGGGCAGTGATCAACGCAGTAAATGAAAGCTGCGATTGCCAGGTGAGGGCCCCGGTGCTCTG  
TACTCATTTTATTGTGCCCTATCTGAACAGGATTCCGTAGAAATGACTTAGATGCTTATCTAGT  
ATTTGACATTGAGATATTTATTTTGTGAAACAATGCAAGCGATTTTAAATCCCCACATACTATTT  
GATTA

>chr16\_2202799\_2202999

CTGGTCTGCTGCCTCCCACAGGCCTGGCTGACCGAGATCCACGAGTACGCCCAGCACGACGTGGC  
GCTCATGCTGCTGGGGAACAAGGTGGGAGGCCCGGCTGTCTCACCTGGGCCACAGGGCAGGGCA  
GGTGAGGGGGCAGGGGCCAACCATGGGCCAGCTTTCACCAAGACCCTGTGCCTGGGCCAGGTGGA  
CTCTG

>chr16\_4665799\_4665999

CTAGGGACCCTGAACCCCTCTGTGATTGGCATCGCTCTGTGTTAAATAGTAGGCACGCCCTTAAG  
AGAGGGGTCTCTAGGAATTTTGGCCCAAATCGGCTGGTCTAGGCTGAAAGgccccggcacactgta  
ggcgccgacaaatactcgttcagtgaatgaatGAATGAGCCACTTAAAAGCTCCGCCGCACGTCA  
CCGCC

>chr16\_14595299\_14595499

aaaaaaaaaaaaaaaaaaCAGAAAGAAAAGAGAATGAATGTTAAAATGTAGGCAGAGGCATGAA  
AAATAGAAAAGAAAGTCAGCTTGCAGAGCCAAGTTTATATCTTACCCACCCCTGATGTGGTTGGC  
CAACAGCTGATAGAGGGCTTTTCGGTAAAGTAGGTAGAAACAAACCCACCAACCCTCAGGTTAC  
CAGGC

>chr16\_53132699\_53132899

GTAACAAGCCCTTAACCCCTGGCTGTTATTCTTATTTCCAAACTGGGGTGCATCATTAGATAAAT  
GCAGAAATCAAGAACCGTCGCTCCTAGTCAAGCGTCTGTGGCTCAGTTCTCAGAGCCAGGCCAAA  
GGAGTAATTATAGCTTTCCTCTATAGTGTACGGGGCAGGAGGCTGATTTAATAAAGGAAGCCTAC  
TGTCT

>chr16\_53132899\_53133099

GTCTCCAGCCTGGCTCTGACTCATGGAACGAGGGAGTCCCAGAGCACTACCCACAGAGGGTGGGT  
GGTGAGCAGCTGAGGGTGGGAGGTGAGGGTGGCCGCTAGCAAGGCCTGGGCCAGAGCCCTGAGA  
ATGAGGAAACTCCCTGCTTGCCAGGAGGAACCTGCAGCTGGAGCCAGAGGAAGTGAGGCTCAGA  
CAGAG

>chr16\_87421499\_87421699

ACTGCTCAAAGAAGTACTGACACTAAGTGGAAAGAAGGGAAAATATTCAAACCTTGAACAAGAG  
GATTGCAGTTTAAAATAAGCGGGCTGATGGAGCCTCCACAGTTGCACACGTTAACAGTCCCAGAA  
TGGAGCAAAGCTATAAACACAGCAGTCTACAGAATTTGTTTAGAATTAACAAACAGGCAAAC

AAAAA

>chr16\_87812699\_87812899

CCCCTCACCCACCCGCCACACCTGCCAACTTCCCGGCTGCAGGGTGGCAGGAAGCCTGAGGCA  
TTATTCAGCTTCCTTAGGGCCCGTTGGCTGATGCAACACAGCTCAGAAGTTGAGTCCAAGCACCA  
AGCCCGCAATGTCTGCGTCGGCCGCCAGGGGTCACTCCTCCCGCGCAGAAGGCGGCCTTGGAGCC  
TCGCA

>chr16\_87886699\_87886899

CGTGGGCTCCTCTTCTCTTTTCCCCTTGGGAGTAACGCTCAGAAAGGTCTGGCCAGCCAAGGCC  
TTGAGGACTCCAGTGGCTTTTCCCAGCTGAACAAATCCTGTGGAATCTTACAATGTAAGCAACA  
GACCCCGAGGAAAGACATCCATGCTAATTAATAATGACACCGGAAACGTCTGAGGTGCGGGAC  
GGGCT

>chr15\_41575508\_41575708

AGCATTAATTTTTTCCCTAGGTGTTGTGCTACCCCTGGATTAAAAGCctggg'gcggtggctca  
tgcctgtaatcccagcacttcgggagaccgagggcggtggatcacctgaggtcaggagtgcgaca  
ccagtctggccaacgtagtgaaatctcgtctctactaaaaatacaaaaattagctgggtgtggtg  
gcatg

>chr15\_44092308\_44092508

GGAGACGTCCGGAAGAGAACAACACTGACCTCCAGGTTGCGGTAAATGCAAATGCCCTGTGAAGGAGC  
TTTGTCTTAGGGCCTCAACACTGCGGCCACTCAGGCTGTTCTCTCCAGATTAGGGGGCAGTTTG  
TCTATCTGGCCCCCTGTGGATTAGCATTCTTTATTGGTTTAGGATTAGACGTCATTCAGGTTGAA  
CGGAG

>chr15\_66124946\_66125146

TGGTTAACATTTAATAATAACTGACGTATGTTGGTTTAGCCCAGATGCTGGCAGCTTTTAAT  
TCTCCAAACTCCTGGCCTGAATACTGATCATGTTTCTCAGGCTAAAAGCCAGCAAAAAGAATCA  
CCTGGCCAAACATCCCCTTTCAGTCTGCTTTCCTTAGAATGGCCTCCCAGGGGAGCTCTCTGGGC  
AAACA

>chr15\_90944396\_90944596

CTCCTTAATTTTTTCTCCTGAAGTCTCCTAGCAATCTGATTGATCTCTGTGGTTTTGACAGTGCCTG  
AATTAATAAATCTTAAACATATTAATGTTTAAAGAAAGATCTGGTTAATGGTTTATTTGAAGAG  
TAAGAGTTTACTTGCTGAAGTTGAATGTTGGGttaaatttttaaaaaataGTTGTATGTTG  
GGAAG

>chr15\_90944596\_90944796

AATTAGTTATTTCAATAAGGCATTTTATTCTAGAAACCTCAGTACTTTAAGGCAGCTAAAGGAAA  
GCCAAAATAATCCCCAAAACAAAAACCAAAAACCTGCAATTTGCAAGGCAGTCATAATCTAAA  
ATATTTTCTGTCTGTCCCAAAGTCAGTGTATTCCCCTTGCCCTCTCCCCCTCTTCCCTCATTGTCAT  
GATTA

>chr14\_61569247\_61569447

GGGAAGGGAAGTGAGCTCCTTTAGCAGTTCAAGGTTTCCCTCCCCTCTGGGACAGGGTGGTAGA  
GGTATGAGAGTAGAGACTGCTGAGAGAATATGGTCTCTTTCATTGTGCTCTGTTTTCTCCTTTTG  
GCCTCATGGGGAGGCATGGACGGGTGTCATCAAAGGGTGACTTGAGGAAGTAGGAGAGCAAATGG  
CTTCT

>chr14\_61569447\_61569647

CCCTGGTTCTCAGAAGTCTAGGTCCCCTCACCTGGCTCTTATCCACAATGCCTGTGCTGTTGGTAA  
TAGTTCACGTGCACATGTCTCCTCAGTTAGGTTGAAAAAATCCTGCTGGCTCGCACTCCAACA

TGGGCTGCTTTGTATGTCTCCCTGGCAAGGCACACAGCAAATATTGGTTGTTGCCTTTGGAGGCC  
AGGTT

>chr14\_61570847\_61571047

CCATGCAGCAGGGAAGCGGGTGTCTGCTGCAAATCTCCCCGTGTGGGGGGATGGGAAGAACAATG  
AGGCTGAACAGACACAAAGGGAGCTGTCTGTGCCAGACAGCCCCAGTGACATCTTCAGGCCCA  
GCCAGGATCCTCCCTTCCCAAAATGGAGCCTGTTTGTCTCCCAgtattagtagggctctttcgatt  
gcaaa

>chr14\_75725247\_75725447

AAGTTCTGCTGCTTTTAAAGTATAAAAGATAAATTCAAAGTTCCTTATGCTTCTCCTTTCTGGGA  
GAATTCTGGGTTTTACTCCAACAGTGGGAAAGTTTTCTAAGCTGGTTTTGCTCCTGTCTCATGGG  
CAAGGCAGTTTGGTCGGTGGCTGTTCTGTGGGCTGCTGTCTGGAGGAGACGGTCGGTGGAGACGG  
TCGGT

>chr14\_77421847\_77422047

TCTTATCCATAGATCCTGCACAGGAACACCCCCACGCAGGCCCTGGCCCTCTCCTTGTATGTGT  
CCCTGAGGCTGTCTCCAGGACTTGGTTCACTTTACAGTCTGCCACCCATTGGTGCattcattt  
ctgtatttaatggttactgagcaccactatgtcccacacactcttccaggtactggggatacagc  
agagc

>chr19\_1265000\_1265200

GAGGTGGGGGCTCCGGAGCCCCAGACCTTTTCCCAGTTTCAGAACTAGGTGGCTGCATCCCCA  
GCGTCCACGCAGGCGAGCCTAAGCCTCGGTACAGTTTAGGGTGTCCGTGGGCCATGCAGGGTCTT  
GGGCCTTTCACAGACACCTGATCTGCACGTACAGACACGCATGGGTGCACGTCACTACACGTCC  
GCCAC

>chr19\_1265200\_1265400

ATGTGCTTGGCTGGTCTGCGCCCCAGCAGAAGGGGTCACCTATGTCTCTGCAGTATCCTGTGTAC  
TGAAAGAGCAAACAGGTGTGTGACCCCAGGGCAGGTTCGGGGTCCGTCCTGTCCCCAGCCTGTCTA  
CTGCGTGTGCCTGTGGCAGGCAGGGTCTCCGGATGCCGAGTGCATGGTGTATGACTTTGTGTCCA  
GTGGG

>chr19\_3983800\_3984000

CTTCCCAGCGTCCCAAGCACTAGAACACCCTCCCCTCCCAGGTGTGACAGCCAAACCTCTCCAGA  
TATTGTAGGAGTGGGGGCAAGTCCCCAGGGAGGGAGAACCACGGAGTTAAGCCCCCTCCTCAAG  
AAAACCTTCCAGCTCGCAGTACCCCGAATCCCTGTGCCTCTCCATCCTGTCTCGCTGGACTGAAC  
CTCAC

>chr19\_4374600\_4374800

CGGGACAGCCTCCTCCCTGGCCCTCCTGGCCCTCGTCTGCATTGAGAGGCTTGGCCTCTGGTCCGC  
ATGCTGCCCTTCCCGTGTGTGGCCTTGCAGCCCGCCTCTCCCCTGCTGTCCCCCTTGGCTCTG  
GCCTGGCCCTTGGGCCCTGAGTCACCCCTGAGGTGACTCAGCAGTCCTTGGAAACGCATGCCGA  
GGACG

>chr19\_4376000\_4376200

AATGCATAGCCCTGCAGGAAGAGACTGGAAATGGTCTTGGAGAGAGAAGTGCGGGGCATGGTGAC  
AGCGGTGAGAGGCTGCAGGTGCACAGATCTCAACGAGGGGCCGTGAGTTCCCTCACTCCCTGAGA  
GCTGAGGAGACTTGCCCGAAAGCCAGAGCCCTTCCCTGAGACACAGAAACCATCTTACCATCTC  
TAAGA

>chr19\_6738200\_6738400

TTTTATTCAGAGTGAGGCAATTGGAGCCCCACCCCAGATTCCAGGCTAGACCGGACTCCGGGC

TGAACTCTGACCCCAGGTGAACTCCCTCTCTGCAAGTTGAGTCCTAACTTCAGCCTGAAACTCTG  
ACACCCCTCGTCCCCACACCACACTGAGGCTTAATCTCTGGTTTAGGCCACCGATCTGGAC  
TAGCC

>chr19\_13957000\_13957200

agtagctgggattacagggcgtgcaccaccatgctcggctaatttttctatttttagtagagacag  
ggtttcaccatattggccaggctgatcttgaactcctgacttcaagtgatccgcccgcctcagcc  
tcccaaagtgctgggatgacaggtgtgagccacagcgccaggccctacaccccagcttttctagct  
ggatg

>chr19\_13957800\_13958000

CTGTGGGGACTCCCAGCCAGGTGCCTGAAATCCCCGGGAAGGGTCCCAGTATTGCTCAAGGGCA  
CTGGTGGGGCAGGTGACACAGGAATAGACCCAGGCCTGGCCAGCCCCACCTCAGGAATGACT  
CACCACCCACCCAGCTCCCGATGACATCAAGGCCTGGCCTGCCACCCTGACCTGGCCCCAGGCCA  
GAACT

>chr19\_18485400\_18485600

GTCCCAGCCCTGCTGACTCATACTCAGCTGCCACGGTCCGCTTTCCTGCTGAGCACGGGGGTGG  
GGGCGGGGGGAAGAGGGGGAGGGAAGGGCACCTGACCGAGGCCAGAGGCCAGAAAAGGACAGAA  
GGTCATGGCTGGGGAGAAGCAGGCAGGAGAACCAGTCTTGGCCTTAACTGGCTGGCAACGTAAA  
ACCTG

>chr19\_39156160\_39156360

AGCTCAGTGGGAAACCAAACATACACCCCTTTCCTCCAGTGCTCCCAGGAAGCGCCAAGTCCT  
GAGCCAGCCAGCAACTTCGAAGAAGTGCCCTCCAACAAGTGGCAGTGGGCACTTGAGCAAGTGA  
CTTAACGCAGCCCTCTCCCAGCCCTGCATCCATCTGGGCCTCATTATCTGGGAGGTGGCTTCT  
TGTTT

>chr19\_39177360\_39177560

GAGTGCAGGCTCTTCCCTTGGGGAGAACCCAGTTCTTTGACGTATAATCTGAGTGGTTTTGggtt  
ggttggttggttggttggttggttTCCCATGTGTGGGATGGCTCCGGAAGTCTGTTTGAGAACAG  
AGGCAGGCTCAGATGGGAGCAGCTCCTACCCCGGGCCGCTATCCCCCTTTACCCTGGGGTTTTCT  
TTTAG

>chr19\_39925160\_39925360

ACAAAGGAAATCTCAGAATTTTTATTAAATTCTAggccaggcatggtgatcacacctgtaatccc  
agtccaggcagaaggatcacatgagaccaaggaccagcctgggcaataaagtgagaccccacgtc  
tacagaaaaatatttctcaaagtagccagcgtggtgatgtgcctgtagtcttggaaccgaaag  
gctga

>chr19\_47611760\_47611960

AAGATCTAAGAGCAAGAAGCAGAGGTGTAGGCACCGTTAAATAAATTACTAACCAGGCCCAATAT  
GAAATTGCTCTACATTCAACTGTATGGAAACGCAAGAGTCAAACCGTTCATCTTTAACTTGCCA  
GGCAGTTGAACAGCCAGGTCCACAGGTACAAAACAATTCTCCCTGGGATCAGCCTTCTGGCTG  
TGGAA

>chr22\_36725454\_36725654

CTGGCCCCTAACGACAGTGTGGCAACCGATAAGGGTTTGGAAACAAACATTTTTGTCATCCCAGCC  
CCCTGCCCTCCCCACTGCGTCTCCCTGTGGTCTGCCCCAGCTGTGGGCATGTTTAGTCACCGGC  
TCTACTAGCAGGCAAGAATGTACCTGCGAGTGCTGGCAAGTCGTGAGCAGCCAACGGCCCAATGC  
TACCA

>chr22\_36767054\_36767254

tcaaagcaattaacaacCGGTAGAGCACCGTCCTGGAGGGCTCCTCCCCAGATCTGAAGGCAT  
CCACAGAATGTCCCTGGATCAGAGAACCCTCTGCTGACACAAACACACTCCCCTACTCCCTTCTT  
CCctgttacagattgaattgtgtccctcccaaaaatatccattatgttggagccctaactcccag  
taccg

>chr22\_38576854\_38577054

CAGGCAGAACTCTAACAAAAACAATGCATTCAAAAAACAATGCATTAGCCCAAGGGTGCAGCCT  
CAACGTTGCCAAACCGAACCTGCCTGACATCCTGTTGGGCGGGTAAGAGGCAGGTGAGGGAAAGA  
CCCAGAAGCTAGGGGGAGGTATTCGTTGGGGTCATGTGGGTAGCCATTAAAAATACGGCCACAG  
GTCCC

>chr20\_30307339\_30307539

TCTGATATAACTGGCTCTTCCACACACATCCCCTCTGTTACCAAGAGGAAGTGACATGTGGTAT  
GTTGTCCAACAGGCTCTGATGATTCTTAAGCAAAGAGATGGAAGATGGAATTTCAACCCCATGGA  
GATCTAATAAACTTACCCAGAGTTGCTGTGTCTAAGACCTCTTTCATATGCACCACTGGGCAGCT  
GGCAA

>chr20\_30307539\_30307739

TTCTCTGGTAGGGGTAGCCTTCTGCAGAGGCTGGCTAGCAGACCAGGCACCTCTCCCAGACTGCC  
TTTTGTTTATAGCTGGCAACAACCCACCTGGTATTAGGACCCTGGCCAAAGACAATAGTCAGGC  
AAAGTGGGCAAGCAGCCTCAATCCCTACTTGGAGATGCCCTCAGAGGGTGTGTCTGCAGTACTGGA  
ATCCT

>chr20\_45988393\_45988593

AGAAACCTggaactaagcccagagaggtgaagtgagctgcccgaagtcacacagctggaagtgc  
cagagatcagatgtccaccccgtagcacttcacatccctaaactctgtaccttctccTGGCTCT  
AAAGAAAGAAGCAAAGCAAAGCCGAACCAAGCACAGCAGAAACAATGAGGCTGAAACCTACGAA  
CAGCA

>chr20\_45988993\_45989193

tgtcacagttagggaggtgtattaccggtatccagtgggtagaggccaaggatgatgcaaaaca  
tcctataagtacacaagaccagccccgccacaacaaggaagtatctgatccaaaatgtccaaggt  
tgggaaaccctgGCTTTAAGCCCTTTAAGGAAAGGGAAGAAAACAGTCCAATCATTCTGCCTCTG  
GCTAG

>chr20\_49435193\_49435393

ACATGGAGACAGCCAGGAAATGGCTTCAGGCCTGCGAGGCCCTAGGAGGAGCCTCTTGCCAGGCC  
ACAGCCCGTGGTGGAGTTGGGCATCGAGTTCCTTCCTGAATCCTTCTGTTCTCTCTGCTTTTACC  
TCCTACTCTGTCTGGTTGGCCCAAATCTACTAGCCTGGCTGAGGAGGAAGATGGAAGACAATGGC  
CCAGA

>chr21\_35320730\_35320930

CTGTGCCAGGTGATTCTGTGTATAAAACAGCGCAGTGCAGCCCCTGAAGCACAAATATTGTTTTG  
GGTTGCAAGGCGGTGCATGTGACGTAGTTGAAAATACAGACTCATTTGTGTATACTCCCACGTA  
AGGAGGGTAGGCTTCATCTAAAAGCCTGCGTGTCAAATACTCCTTTCTAATACATCCTGGTGTGC  
TCTGC

>chr21\_45147572\_45147772

GGAGGGAGCCAGCACTAGGTGGAGCTCTGCCAGCCGGGGCACAGGGAGGAACAGCATCCAGGAGG  
AGGGTGCAGCGGGTGTGAGGCCCTGTGGAGCAGACTCTGGAGCTAGAATAAGGTGGCATTTTTGC  
TGCACGCTGTGGGGTGGACGGGGCCCGAGGTACACCAGGGAGCCCATATTGGGTGAGGAATGC  
TGCTT

>chr6\_30582421\_30582621

TCTCCAAGTTACTCTTGCAAGCCCTTGTGTCTTTCCCATCTCCCTCTacacacatatatacat  
acacacgctcacacacaTCCCTCAAAGCTTCCCAGTCTTAGGTTTGCCTGTTTTTTCACCCCTGGC  
AGCTGAAGTGGGGAAAAATTACAAGCAGTTGTGATGAGTGAAGGAAAGTAAAAATAAAACTGGT  
TCTAT

>chr6\_52382641\_52382841

GTCCACCCTAATCTCAGCCACCCTAGACTGGGAGAATGTAACGGTGGGCAGTGGTGAGGGGGTGG  
GAGGAGGTGGCGAGGACAGAGAGAACATGATCTTGGAAATCAGACAACTTTCCTTTTTCCCTCTC  
CCTCTTCCTTTTCCACAAAGACCTATTCTGTGAGAGGCACTGGGCTAACTGTTGAAACATGGAGAT  
AAAAG

>chr6\_52382841\_52383041

ACACCACCCCGGTTGGAAAACATACAGTGCAGCAGGGAGACTAACAGACAGATGTACGATTACA  
CTACAGACGGGCAGCGCTCCTGAGAAGCACATACAGTGAAGCCACAGCAGGGCGAGGGCCCCACTCT  
GGCTAGGGTGGAGGTTGTGGGTAAACTGTTCACTGGTCAAGGTGAACAGAACGGCATTTGGAAC  
GGGA

>chr6\_74289479\_74289679

ATACCATGCACTGGCAAACATACAAACAACAAAAAACAGGGTATTCTATATATTTCTATTGATTT  
TTAAATGTTGGCTGCAGCTGCTACATTCCTCGAGAGTAACTGAGTCCCACACAAGAAACCCTAAG  
CTCAACAGATTCTCTATTAGATGATTGCATTTTTTTCAGAAACAATCTCCTAACACCAGGCCTCT  
GGCCA

>chr6\_74289679\_74289879

ATTTCTTTTCTGAGTTCCTGTTCCCTGCCAGAAAGGGCAAATTCATTATCCTGTGAGGTCCAAGCT  
GGCCTCTTGGAGGTACAGCAAAGACTTTTACCCTTGGCCTGGAAGCAAAGGCTAGCCATGTGGCG  
CCCTTGGGCTTTTTTTTTTTTTTTCTAGAAAGTTTTCTGGTGAGTAAAAAACGTGCTCAGAGT  
CCTAc

>chr5\_133839101\_133839301

TGGGGCTGGCCCTCTGCAAGGAGATGCCCCCTCCTCCATGCAGGAAAACCTCTGTGGTCTGGGAG  
CTCTCAAAGGCAGGAAGTTGAATCATCAACTCCGGTAAACGTCTCTGTCAGCCTGTGGGTCTGCC  
CAGGGAGCTCAGGGCTCCAGGCCAGGGGGCTGGCTCTGCGCTTTGTTTGCTGCTTTCTCTGAAC  
AGGAA

>chr5\_172192195\_172192395

GAGCAGGGCTGCTGGTCTGCACCTACAGGCTGTTCTCAAACAGGCTCACCCCGCAGAGCTCTGGA  
AACGAGGTGAGCAGCCCTCCACCTGCTCTCCAGAAAGCAACCTGCAGAGAAAAACAGCCCGGGT  
TGACCTGGATCCACCCGGCGGGCGGGGAGGGGCCGACGCGCATTGTTTGCTCTGTGTATGG  
CAACC

>chr5\_179246394\_179246594

ATGGCGAGAAAGCAAAGGAGCTCCTTCTTGGGGGTGAGTGGGGCGCCTTGAGCGCTTCTCAAAG  
CTATGTTCCCAGAGCCACAGGCCTTCTTGTGTCCCTCACCTGCTCAGACCGGGCCATAGCCGG  
GGGCTGGGGCAGGAAAGCCGGCCCTCGGCGGGGGCCACGTGGCTCTCAGGCGCCTGGGCTGCTGA  
GTCAC

>chr3\_39192596\_39192796

CTCAGCAGCTACCCAGGAATCAAGATCCTGACCATGGCAGTGTCCCAGGGTGAACACAGCCCCC  
TCCCTAGGGTCTGGAGGAAGGAAAAGCAGTTCCCAGGAGCTGGCTCAGACAGAAAATACCACACC  
GCCGAGGAACCCAGAGACAGGCCCTGAATCTGAGAGCCAGGCTTCTTCTGGGATCTGAGCCCTG

ACAAT

>chr3\_39193196\_39193396

AGCACCTCTAGCCCCACTGAAAAACCAGCCTGGGTGGCCCTGAGAGGGCAGACCGAAAGCCTTG  
GCACCTCCTCCCAACCATCCCTCTGAAGGAGAGCTGGGGGAGGGGACGGCTCCTCGGCTTTGGC  
CTCcaggacctggcactggataggtgccaatgtttgctggctacatgaGGCACTTGTTCTGCA  
GAAGG

>chr3\_39193596\_39193796

GGTGTGGGATGGAGGGTCTGAAGGGTGGGACAGGGTACGGCTGGGGTGAAGGTAGGTCTCTCCG  
AGGAAGGAATGTAGGCAGAGTTCAGATAGGGGCTCCGCATGGGTAAGGAACAGGAGGAGGGACC  
AGCACAGTGTGATCGGAGGAGGGGCAGCCGCGAGGCTGAGCCTGGGCTCCAGGGCAGGCTttac  
ctcga

>chr3\_52086760\_52086960

CTTTCAGGAAGGATAAAGGTACCCACTAGCCAGGCCAGCCTGGCGAAGCCTGCTTCCCTCTCTC  
TATTCCTCCTCGTTGGGGGAGTTCAAATGCTGAGGCAGCACCCCTAGCCCTCTTGACCCAGG  
GGGTGGTGGGCAGGGCTGAGAAGCTCCAGGCAGCCCCAGTTGCAGCCCCTCCCCAGGCCTCAGC  
TTCCT

>chr3\_53304360\_53304560

GCTTTCAGCAACGCCCTACAGCCCCTGTCAACTCCTGCCAGGGGCGCTGGACAGGCTGGGCTG  
GGCAGGGGCGGTGCTGGTGACAGACAGGACACTCTTAGGGGCTCCTCCTGCACAGTCTGCAGGAC  
GCAGTAGGGAGAGATCTTCATCCTTGTCCCCTTTTCTGGTACCTCTTGGGTTTCCCTGAGCAAGG  
CTGGG

>chr3\_133291710\_133291910

CCCTCCATCCCCCTATCTTGTAAGAAATAGTATAACCCACTTTACAGATTAGGGACTTGACGATAG  
GATTTATTGAACTTGACCTTGGTAAACATAATCCAGAGGGTGGAGTTCAGACAAAATCCCTTTCT  
ACCTACCAACCAGCCTATGAAAGATCTTTTAGTAAATGGGACCTAAACTTCAGGCTCACTGCTCC  
TCTCA

>chr3\_171858306\_171858506

ACATTCCATACGCTGACCTGAGAAACCCTTTTACAGACAGCAGCTTGCTGCTGAGTAACTGGAAG  
TTTACCAGCAGGTGGTTTCCACCAGGGCCGAAAATACTGACGGGCCAGAGCAGAAAGTCCAGG  
TTATGGAAGGAATGAGAGCAAAGGCTGTGATTGTACGTGCAACTGTCATCTTGCTGGGATTGTGT  
AATGT

>chr3\_177077906\_177078106

TACTTTCAGAGTACCTGGCATTATCTAAGAGAGGAGCACTCCGGCTGCCCAAGAAAGGGCCTGA  
ACTGGGAGCTTGGCGGCCCTCGGGGAGGGGCGGCTGCTCAGAGCCAGGCCTTTCCTAGTGGGGAG  
GGCATCTGCAAGGCACAAATTAGAAACAGACTATGAGCTTTTGCTTCACTAAATGCAGATGCACT  
TTAGA

>chr3\_183903106\_183903306

AGACCAATTGGAGGAATATTCACGTTAAATATAAAGCAGTAGCATCATTTTGGAGGAAATTCCTA  
ACTTCCCAGGGAATCGGTGAAAGGAAATAGCCTTTTATTGGCATTATTGAGTGCAGAGAAGTC  
TGCTCAGGGTGTAGGTAGGGAATAATTTATACAGGCCACGTTGTCCTGGTTTTCTTGCCCTTTGG  
CGGTG

>chr2\_27603896\_27604096

CGCGACGCCCGCCAGGCCGGCCTACCAGCAGCTCGCTCTGGGCTCTCCTATACACGCGCAGGACA  
CACACGAGCACACGCACACACTCACATGGGGGCTCGCCACATGCTACAGATGGGACCAAGTCGGG

GGCCACGGCAGCAGAAAAAAGGACACGATGCGTACGATTAGGTTTTGGCCTTTAGTCTGAAAA  
AGTGT

>chr2\_43446096\_43446296

gcaacacttacagctgctcaccacacagagccacacacactaccacacacagcagcagctaca  
cacaggcacacccaaaccactcccatagatcacacacacacacacacacacacacacacacacC  
CAGACTCAGACATACCCCAAGGACCCACATACCTACCTACACAGCAACAGACATACCCAAACCC  
CACCA

>chr2\_43448096\_43448296

AATGAATGTGGCTTACCCCAACATTCCAGCTGATCAAAAGTACTTGTTTTAGAAAAATAAGTTTA  
GGAATGAAGTGGAAACAAGGCCTTTGAAATGCAGCTTAACCTAAATAGCACATTTTAGACTTTTC  
CTCCCCTGCACATTCTTTATGGTGTAGGGGCCAGGGAGCCTGCAGTCTTACCCCTCCTGAGC  
CCTCC

>chr2\_70359496\_70359696

GCTTCAGCACAGCCTGGGGAAGGAAGCCCTGCCAGCAGGCAGCGCCAGGCCAAGTGTACCCTCTT  
TCCTTATCCCTGACTTAGAAAAACAAAACCGATAGGCAAATCCACTCATCGGCATTTCTGAATCC  
AGTTGTTAACCAATCCTCTTCTGCCCTTACTCTCTTTCTTCCTTTTTCCAGAAAATCCTGG  
AAAGC

>chr2\_112221529\_112221729

AACAATGTGTGCTTCTTACAGGGGGAGAGCAGGGAGCCTGCAGCCCGCCTGAGCTGCAGGTGCT  
TCAGCTGGTTTTACACTTGCTGTCCCAGCCCTGCTCCTGGCCAGACGCCGGCCTCTGTGGGCG  
GCCCGGAGGGCACCGTGCCTTGGTGCAGGCCTTCGTGGGCAGCAGCGCTGACGTTTGAAACAAG  
GCCCC

>chr2\_112221929\_112222129

CTTTCAGAAGGGCAATCACGAATATAAAGTAGAGAATTAGTAGCAGTGTCAAGAGTAAAGCCCCG  
AGGCTAATACCAAATTCTAACATAAACGGAGTGTTGAAAGGCACATGCCAGGAATTATATAAAC  
CGAAGGAAAAAGACAACCTGGGGGGTGTGTTCCCATGCATTCGATTTGGTCCAAGGAGAGCCAGGC  
CCACG

>chr2\_219270556\_219270756

GGGGGGTGAATATGGTTGGCCTGCATCAGGTGGCCTTCCCATTTAAGTGCCTTCTCTGTGACTGA  
GAGCCCTAGTGTGATGAGAACTAAAGAGAAAGCCAGACCCCTATCCTGCTTCTGTGGTTATTGCG  
GGGACTTCAGCAAGTGGGGTGTGTGCCTTGACCTGCGGCTGCCGTGGGCCCCCCCCCCCCCGC  
TTCAG

>chr1\_8772813\_8773013

GCTTTAGAAAAATTCAATGGatttttttttttaatgaaaaacaaaataaaaaaaaaaCACAGGAT  
GTAACCACAGCTATATTGGTCTTTTTCTCAGGAAGGTCAGAAAAGCTTTAAAAACAGGAAGTCTG  
TGCTATAAGGTTGAGAAATGTTTGTTTAACAGCCTAAGGCGTCATGGTTGCAGTTTGCAGTCAG  
CTGCT

>chr1\_23881613\_23881813

GCAGAGTGGAGCCCTTGGAAAGCAGCGCTGCGGGAAAGAGCGCGGCAGGAGGTTCTCAGGTTTAGC  
CTGGGGCATGGGGAAGAGTCGTGGCCACGAGGGGTGATGAGGCCGGGAAGACAGATAATTGAAGG  
TTGTCCGGCGCTCCACAGCTAGAGAGCTATAACTGGCTTTCTgaaaagggcaccattttctggtg  
tcaca

>chr1\_23882013\_23882213

GAAGCCTCGTGGATActtttatgcgcttatagtttatccgaacaacacacatggaagggaggtac



cgacatccccctttcacagatgaggGGGAGTCCTAGGTCTTTCATTCCACAAGCGCTCCCTGGGA  
CAAGCACCCCCTGGGGACCAAGCATGTGCCAGGCTTTGGGAATGGCGAGGGAAAAgagccaattt  
gaaga

>chr1\_27049813\_27050013

GAATGCCCTATCACAGGGGAGGGTCCCATACTGGAACGGATCAACAGCTGTCGCCCTGTCCCTGG  
AATCACAGGAAGCGGAGGACGGGGTGCCTTTGTATAGGGAGCTCTGAAGCCAGACAATAGTTTGT  
GCTGGCGGGGCCATGTGGCGAGTCATGTGACCTGGGGCTGTTTTCTGCTGGGGTCCCTACCCATC  
TGTTTC

>chr1\_36839613\_36839813

CAGCCTGCTCCCCAGCACATCCTCTGCCACCGCTGCCTTTCCTCAGCAGGACTCCAATGTGCTG  
AGCACAGCAGGCCTGGGGGCCAGGCAGGGCCTGAAAGTCCAGGGTCTGCAGCTTGGTGACCTAGC  
TCTAGTCTCCTCCAGGAAGCAAGGTTTCATGAGTTAGCCCCACATAAGGAGACTGCGTAATCAGTG  
ACATC

>chr1\_36840013\_36840213

ATGGAGTTAGAGACCGGTCCCCATAGCCCTGAACCAGACCGGCTGCTCCTGGGAGCAAAGGGCTT  
CACCAGCAGTCACACTGAGAGCCACCAGAGCAGAATCCAGGGCAGCATTGCCAGCCCTGCCACCA  
GCTCTCCCCTCCCAAGGGCCTCCGGAAGCAGCTGATGTGACAACAATAATCTGTCACTGTGTGT  
GGGTG

>chr1\_36840213\_36840413

TCAGAGGAGGAAGGGACAGACTTACAAGCTCTTTCTCTGGGCCGTAAGTGGCTTGGCCTCTCCATC  
CAGAGAGGTAGCCTGGGAAAGCAGCCAAGCACCCCTGGCTTAGGGATGTTTGCGGTGGCCCCTTGG  
CTCTTCAGGGTGCCTTCTGCCATGCGCAGTGACGGCAGACTGAGTCACTGGCAGGTCTTCCCTGT  
CATAAC

>chr1\_36853013\_36853213

GAAGGGCTTCAATGAGGTGGGTGACCAAAGACAGGCATAAAGAAGGCCCCAGCCCAGCAAGCTC  
CACTCTCTGACAAAACAAAAGCCTAGGGATTCCGGAAGCCCTGACTCTGACAAAAATGAGTTCT  
GGGTTTTCCAGAGCTCTAATTATCAGCTAGATGAATCACTCTGCGCTGACACCACCATTCCTACC  
CCCAG

>chr1\_36853213\_36853413

GAGACTCTCAGCTGATTGAAAAATCCAGGATTTTAACAAAAGGAGAGGAGGAGGAACAGAAAGCTAG  
GAGGAGAAGAAGTAATGAATAGAAACCAAAGGTGCCAGCCAGAGGAAATGAGAAACTGTCATCAG  
GACACTACCATGAGGAGAACGCTGGGacacacacacacacacacacacactcacactcacGCT  
GACAT

>chr1\_36853613\_36853813

CTTCTCTTTGTCACCAAATCGCAAGGCCTAAATCTGGCAAATTTTGAGTGTCAGACCTACACCCT  
GTGGCTAGGTACCACCACTGTGGTGAACAAAGGCACCTCTTATACTCTGTCATCAGTATGATGCC  
AAGAGTGCTGGGAAacagaatagcacagcagtttaagatcattgagttggagtcacacagacctga  
gttca

>chr1\_37943413\_37943613

AAGCTAGCTGTAGGGGGGCACTCCAGGCCTCATGTGCTCTACCAGGAGGAGGGCTCTGATAGCGC  
CCACTGATCAGTTTTTCCATCTGCTGAGGGAATATTCAGGTGCTAGGGCTGCTGAGAACCGACTT  
GTCCCAGCCAAGATTTTCAGTGCCACAGGCAGTGCACTGCCCTGAGAGCCCTGGCATCCCATTA  
GTTCC

>chr1\_38465613\_38465813

CCTCCTGATCCAGAAAACAGTGGAATGCTAGAGAGGTGCTGGACTAATGAATGGTAGAAGAGGCC  
AGTGTGAGAGGTTGGGCCCTTCCCTCCCGGGGAATCAGCCAAGCAATGGGAACCTCAGAGGCTCAG  
CTTAGGTTCAAGCAGGAAGGAAATCCTGCAAGCTGGACACAGCCAGTCTTCCCTAGCTAGACCC  
CTGCC

>chr1\_38466813\_38467013

CCAGGGCATGAGGCCACCAGGGGCCAGGGTCTTTAGAGCTGGAACCTCTGGGCTGGGGGCTATGG  
TGTAGAGAAGATACTCCTCTTTCTCAGCCCCCTTCCCTGCCACTCAGGCCAGGTTTCTCTGGCC  
CAACATCTGAGGATTGCTGGGCTGTCAGCCACGGGGCAGCAGGGGGCCACACAGGTGGAATGCG  
TCCAC

>chr1\_45272613\_45272813

TATGGAAGTTAGCCAGGTACGCTCGGAGTCTTAGAGACTGCCATTTCTCCCTTCCACCCGACTTC  
TCTGGAAGGAGAGGCAGGCCCTGCCTCAGCCTGGACTGTGGAGGCAGAGCCTCCAACCCCTAAC  
CAGGAAGGACTGACAGACTCAGCTCCTTCAACCCACAGATCCTTCCAGCCCTGGGGGTGTTGAA  
TCCAG

>chr1\_45273413\_45273613

GAGGCCTAGGTTAGGGGAGATCTTGAGGCTGCGGGGGTGGTGGCTCAGGAATCCAGAGTCTGGG  
CCCACAGGAAGGAACACGTCATGGCTCTGTTGTCTCCCCATCGGCCTCGACAAGGACAAACATTT  
CCGCTCCCGGCGCAGAGTTAGGGTGGGGCTTGGATGACTTCCTCAGTTCAGGGCTATGTGCGGGG  
GAGGG

>chr1\_53791412\_53791612

gcctgtccacctgtcgccctcctccctcagaccccgctcagtgtccctggctggcagggctggcc  
tgtcttggagggcgccccagcgctggcagcgagcagatgctcccgaatgatgaatgaatgaCTG  
CCCGGGTCTATGTCTCTAGGAGAGCCCTGTTTTTCTGTTCCCGGAGCTACATTTCTTCCACCGTG  
ACAAC

>chr1\_90372212\_90372412

TGGA AAAACCTGCCTGTGTGTTGTGCCAAGTTGTGTTAGCCACTCCATGTTATTCTTAGATGGGC  
TCTGGAGTATGACCAGCCTGTGTGCATGCATTTGTAGTAGGCACTGGATAAGA ACTGGAGTAATG  
ACTACAGAAGTGAACGGT CACAGCTCTAACCTGCTGAGTCATCTCAGCTCAGCCTTGCTAGCAAG  
GCCTC

>chr1\_110546477\_110546677

TGTTTACTTCTAGTTGGCAGTTGCAGGCCTCGATTACTCATTGACTGGAGCACTTTAGGAGATAA  
TAGTGAAGTGAAGTCAGTGAAGTGTTAGTCTTACAGGAAGAGAGGGGAGTAGCTCACAAGGGTC  
AAACTACTCTTTGGCAGAGTTTTTCAAGCTGTGTGTTCCCTTACCTTTTAAGTGACTCAGCAGTTT  
GGGC

>chr1\_110546877\_110547077

CCAAGAACTCAGGCCCATCTGGGGAGAGTGAGAACTTAAGAACTTGAGACAGGGAAGGAGAG  
CCGGGAGCAGCCAAAACCTGCTAAGTCTCAGAAGACTGGTTTCTGCACAAGGGAATGGAAGAAGT  
GACTGGAGGTGGCTGTGGATTCAACTCTGGCCTGAGATTGATTCCCTTGAGATAAGTTGTTTTCT  
GGTGG

>chr1\_145455643\_145455843

ACAAAGGGAAGAACC AAAAGAGAACTGCAACTCAGCCACACACTGGTTTCTGTA ACTGGAGAAC  
AGGATATTTAGGGGGACTTGCTCTGCACAGACATACTTTCAAAGTGGCATCTCCAGAGTCTGGA  
AGAGGAGGGAGTATGGTGAATAAGTCAGCTCCTCCTCCCTCCTCATACTGGTTTTCTTGCCTTT  
CCCCA

>chr1\_145456043\_145456243  
TGAGGCCTTGAATATTCCTTGGCTGGGCTCGATTGTGAATATGTGTCCCACCATGGGGGTAGAAG  
GGAAGGGACAAAGGACAAGCGGGCTGTAGGGCTGTAACCCCTCCAGTGTGTACACCAGACCCGGC  
TTAGTTAAGCATTTCCTTCATTCCTCCAGCCCTCTGTACCAGGCCTCACCCACAACAGAGAGAC  
AGATA

>chr1\_150539976\_150540176  
GTTTCCCTCTTTCTGTTTCTCTGCTTTCCTCATGAGGGATTTCTGAGAAATGAAAAAAGTCAC  
CTCCACAGCCGAGCCTGCAGTTTTGTTTTTGGTTTTGTTTTTACAGATGAAGAAGAGGGGGG  
TGGAGGAAAGGAGTATAACCGCTAAGCATCTAGTATTAATCCAAAACCTCTGCAAAGTAAGAGAAA  
TGCTC

>chr1\_154943376\_154943576  
TAGGGCTATCCAAGCCCCTCTCCCCTGCCCTATACAAACAAC TAGTAATCTGGGGAGAAGTAAAG  
TGGGGGTGGGAGGGAAGGATGGAAGAGTGGGACGGAAGGAGATAGGAGGTCTGGGTCACT  
CAAAACCGGACACACGCAGGCCAAAGGGGGCAGGAAGCCAGGCAGGAGTACAGGGGAATGAGGGA  
GGAAA

>chr1\_154943776\_154943976  
TAGCGAAGTGGGGATGGGAAGTAAGTGGTCCCAATGGATGCAGAGCAGGGCCAAGAGGAAGAGCA  
AAGCTGGTAAAAAAGGGGAATAAAGTTCAACCTGGATGATACATCAGGAAGCTACCAGGCAAGA  
AGGGAACAAGAGGACATGCTGGTCACGGCTTGTCTCTACGTATGCCATCTACCACACCAAGACC  
GATGG

>chr1\_154944176\_154944376  
TGGAAGAAACAGTTCTCCAAGAGAAGTAGAACTACAGGCCAGGAAGGGACAGAGAGATCAGAAG  
ACACATCTGCGTCAATAAGGACAGGAGAAAAATAAGTACAGGAGAAAGGGGTGT CAGGAGAAGAT  
GGGTGAAAGCTGGACACAGGGAACAGTCCCAAACCCATTCCTGCCACCCACGGCTTCCTGCCACT  
GCTCT

>chr1\_156074576\_156074776  
AACCTTAGCTCCACCAAGCTCCAAGGGGAGAGAAGAGAGGGCATATGGGAATGTTTTGCTGGACC  
CCATACTGCACTCCAGGCCAGGAAGCTCTGCATCAGGAAGCCAGCACCATTTTACCTCCTCTG  
GGGTAGGACTGAGGGGACCATGGCCAAGAGGAAACAGATGCCCCCTTAGCTCCTCCCTGGGTAGC  
CTGAG

>chr1\_156074776\_156074976  
CGGGCCAGGGCCTGAGAGCATGCCAGTTTTAGCCTGTCTTCCTGTCCTTCCCAGCCAGACCCCTC  
TCATCCTCCTCCCCAGTGGTTTTCTCATTACCTGTCACTGACGGAGAGCCCCTCAGAGGTCAAG  
GCCAAAGTGAGGTGGGCTCTTGGCATGCTGTGCAAGCTTGGAGCTCACCCGGCAAAGAGGGCCAA  
TGGGG

>chr1\_156075376\_156075576  
GCTGCAGGGGCTGTGGACTGGAgttgattcaccagggagcaaggaagtgaagtttcagggcct  
ctcagttgcacgggcccctttcaagaccgaagaggagccctgccaaactttccacatgatcccat  
gtccataacatttgcaaaaagatcattttGTATTTCTTAAAGAGGGCCTCCCCACAAAATTGTGT  
GCACT

>chr1\_156092376\_156092576  
AAAGGGCAACTCGTTTTTCGATGCCTCTCCCTTCTGGACGGTGGAAAGGGCTGTGTCATAGAGTAG  
GAACGGGAGATGCGGCACAGGAATGGCTCCCATTGACCCGGTTGGGGGCTAGGGCGAAGGCCTA  
GGAGAGGCAGA ACTGTTACCTTAGAGCTGGCCAGGATTAGAGAACAGTGCCTGGAACCGGGGGGA

GGGGC  
>chr1\_156092976\_156093176  
TAGGACACATGAGTTTCCTTTAGGTCTGGCTCAGGGGAGCTAGACTTCATTTCAAGGGGTCTAGGT  
TCTGGGCAGTTGAGAAGGAGGCTATTTGGGGTCACCAAGGCTCCCCTTTCTTCCCAAAGCTCTAA  
CACTGCCACCTTCTGCTGGCTAGGAGAGAGCTGTGTCTTCTGAGGCTAGAGCTGGAATGCAGTGA  
GACCA  
>chr1\_156093576\_156093776  
TGCCCTGGCCTCCGGCCTCAGGCTTCTCCTGCCTCTGTACAATGCCACGTTGATACGCCCAGCAG  
CTGTGACTCAGGCCTGGCCCCCTGCCAGGCCCAGCACTTCTACTGGAGTTGCGTCTGAACATGTC  
AACAGGCTTCCCTATCCCTCTCTCAGCACCAAGTTCTCCCCACTTCAGCCCCTCCCTCTGCCTGGAA  
TTAAA  
>chr1\_156096176\_156096376  
CCGGGCTAGCCTGTTGCCCCAGCAACCGGGCCCAAACAGGCCTGTGGCCGGCCCTGGCTTCCA  
TATCTGGCATCAGAGTTGGGCTGAGCAGGGTGACTCAGAGGGTGGGTGAGCGCTGGCCCGGTGC  
CCACCTAGCCCCTTTGCTGTGCTGGTGCCTTTCTTCCCCAAACAGCCCCAAGGGCCCGGGCCTGC  
TGCA  
>chr1\_156099976\_156100176  
AGGCTCCTCAGAGGGAGGGAAGCTTGGCCAAAGGGAAGTGAGTAGAGTCCAGGGAGAAGGCTAAG  
TAAGGCCCTGTGTGGGAAGGGGCAGGAGACAAAGGTACCCCTGTCTCTTTGGGAAAGAATGGGAG  
GAGAGAGAGGGAAAAGCATTTCATATCACGGGGTAGAGCTCTGCCCTTGCCCCAGGCACGTTCCCT  
GAGCC  
>chr1\_156717576\_156717776  
GTGGGTGAAAGTTCAGAAATAAGGAGAAATGAGGTTCTTTGCAGAAGCACAGACTGCAAAGTGGC  
TACCTGGCCACCGTCTCGTGCCACCCAGCTTCCCATGGAAAGCACACTCAGAGGCAGATAGCTG  
AATGGTGTGGCAGGGGACCCAGGAGGCCACCAGCTGCCAGCCCCAGCAGTGGGGGAGAAACAAA  
AGAAC  
>chr1\_234859777\_234859977  
CCTAAAACATTGCATTTAAAGAAAAGTCAGAGGCGAGGGGGAGGCTACAGGAAGTGAGTGGGAGTA  
GAGATGTGTGTGTgagagagagagagagagagagaaatggagggagagggagggaggaagggaggag  
ggaggtggagagagagagaAAAAACCACCTGCTGGCAAAATGAATGCAGCAGGGATGATGTGAT  
TGGAA  
>chr9\_35073000\_35073200  
GTATTAGTCTAGTCCTATTGTGGTAACCCATACACCCATCTTCTCCCAAACCTGGAGATCTTCT  
AAGACGCCATCACCACCTGACACTTCTTGCTCCTTCTCAACGCTGCCTCCAACCACCCCTACTC  
TGAACCTTCTGACTAGCACCCCACTCCTACCCCATTTGTCAGTGCACCCTCTGGTAACCCCAATCC  
CACAG  
>chr9\_35073200\_35073400  
CCTTTGCAGTTTCTCAGCGCTTGTGCCTTTCTTCTCCCGTCATTAATATTAATACCTTATAATA  
AGGCACTCAAATCCAGAGAAGTCAAAGGGCAACCACAGAACACACAGCCAATTCAGTAGAACCCA  
AATTAGCAAGAAAACCTGCATATGCTGGGACTTGAAAATCCTTGGGCCCCAAATAACAGGGGTCCC  
TGTTA  
>chr9\_91932580\_91932780  
CTTAAATCCACTTGCACTTTCTCCAAGCCTTTGAGTGAGAGGAAAGTTCCTCCTCCATCTATTG  
AAATCCACTCTGCATTCTTCCCTGTACTTTTGGTCAACCTCCTATCCCTGCCGCACTTTATACAT

TTCTCTCAATATTTAACGAATTTGCTCTGTGTAGAACTTTTTTTTTCTCGTGAAAAATTATACTAT  
TCCAT

>chr9\_99183179\_99183379

taaaatgaggctgaaacactactgggctgcattcccagacggttaaggcattctaagtcacagcat  
tagataggaggtcagcacaaaatacaggtcataaacacattgctgataaaacaggttgagtaaa  
ggaaccggccaaaactcaccaaaacaaaatggccatgagagtgacctgtggtcctcctcaactg  
ctaca

>chr9\_136008979\_136009179

CCTCCCACCGCAACTCTGGCTGCCTTCAGGAGCTGGGCCTAGTGAGGGCCATACATGGCACAAA  
CATTTCCAGCTACTGTGCATGAAGCTTACGACGACCCTGACCCCAGGCTTCTCCCAGGACACACG  
ACCTACCAGTGGTCCCACGATGCTCTGCCCAGCACGCCGGGTGGCCTGGGATAATGCACCTGGCC  
ACACA

>chr8\_103801224\_103801424

CTTTGGGTGGTGCACAAATAACCAGTTACTCAGCTCATGTCCCTGAATTGGCAGGACAGCCTTGT  
AGGCCCCAGGGACATTCAGTGACCTCAGTCTCAGAGAATGTGGGGGAATTCATGAGAGGCAGGA  
CTGCACAGCCCAGCCTGAAGGGAAGGTCAGGGCAGGCTGGGGAGTTGACAGAGCCAGCTGAGGTG  
TGGGG

>chr8\_103801424\_103801624

TGGTGTACTGTACCCCTGGGTGTCAGGGTGGCCCCACAAGCCCAGGGAAGACAGCCAGCTGCGT  
GGTCTGCAGGCCAGGCGCACTTGC GGATGTTGCCACACTGAGCCTGCCTCTCCCGCACTGGGGAC  
TGCCCCAGAAGCCTGAATTGTTTTCAAGGCTTCTACTGCAGCTGCTGGGCCCCGCTGTTTTCC  
TCCCG

## (2) 742 weak enhancers in $S_{\text{weak}}^+$

>chr2\_87930085\_87930285

aaacaaacaaaaagaaggtaatcagtggtgatgaggatgtggaaaagttggaaacttcagacat  
tgccggtgagaatggaaaatgatacagctgttttgaaaacagtttaatgtttccttaaaaagtt  
gaatagagaattagcatatgaccagcaattccatTTTTatgtttgtaccccaaagaattgaaag  
caagg

>chr2\_88301085\_88301285

attcaaaataaaataatgagtacacgTTTTTgaataacgtcctattaatgaaaagaatgggatcc  
atTTTgctgggataacTTTTgctagttgaggttccaatgtaaaatcttctcagatcgagggca  
gtaaaaaagctggatTTTgatctgcaggtggtagtggtgccggcccTCCAAGCCCTATCTAtggggg  
ggagg

>chr3\_126780310\_126780510

acatccttgccagcattTggtgtTTTTTTTTTTTTTaaattagcatactgttcttgttttatagctg  
tagcatttctctcatttctcgaaaactattaattagaatTTTTggtaaatttcttctgtgtttcct  
gctgtaatgttggtttctTTaatttcttctctatgtttactttgttttctgtctctcaagctgg  
ggctt

>chr3\_171979306\_171979506

TGGCTTTTATTTTAAATTTAATTTGCTCAACCAGACACACAGTGTAGCAGACGCTATTACCGTAT  
TTCAGTTTTTGGTGTGTAGTGAGACTTTGAAATTTCTAGGAATTGAGTAGATAACACAAGTGTGA  
TGTGGGAAAGGTCCCTGGGAAACAACAGTGATTCTAAttaggctggtgcacaaataattgtgggtt  
ttgcc

>chr3\_176244106\_176244306  
gcctctttcttgatcaagttcatgatgccagatacttttctcttttgatgataaggtctcttttc  
ctcattcctcatgtaaattgggcctttggcaagtctgtccctccggatcaccagatatgtcttaat  
cctgcttagactcaaATTCATATTTAAACTGGGACTCAAGCCAGATGCATTTTTCAATGTCCTTa  
tcat  
>chr4\_114130551\_114130751  
agatgcaaactccccacaggacagctttgagggtacttctttttgtaggcctctgaacgg  
ccatctcaaatatgtcaaagaagaatatttgttatcgaaactggggcccactcgccctgt  
atagcaataccagatatccacaccaaggttttcagcgggagaaaggaaggtgtttattggcaggg  
tgcct  
>chr5\_172834994\_172835194  
ctttctggtttagttttccttctaacagacaggaccctcagctgcaggtctggtggaataccc  
tgccgtgtgaggtgtcagtggtgccctgctggggggtgcctcccagttaggctgctcggggtca  
ggggtcagggaccacttgaggaggcagctgtcccgttctcagatctccagctgcgtgctgggag  
aacca  
>chr7\_70005464\_70005664  
CGGGGAAGCACACAGTCGTCTCTGGGTTTCTGGTGAAAGTCCATTGTGCCTGCTCAGGGCTCCT  
TGGTGCAGGAGCAGTCAAGCCTTCCTGGAGGTTGAAGATCACGTGCTGTGTTGGTGGCTCCCCA  
CTTGGGTTTCCATCGATTTCATGGTATTGGTTTGGGAGGTGCTCACATCCTCCTGCAAGTACCCTG  
TAGTG  
>chr7\_107615764\_107615964  
CACCGACACTGGCCAGCAATGAGACCAGTAGAAAAATCAGTATAGCTGTCACAAATTCCTCATT  
TTGAGAGCCAGCTGGGTACACGTACATCCTGAGAAGAAATGCAAAGCACCAGGTAAAAATCAGGA  
GAAACTCAATGTATCTTTGTATAAATACATATATTCCCTTCCTCCCTCTAAATCTCACAAAAGT  
CGACT  
>chr7\_152109267\_152109467  
cttgaggcaagagtttgagaccagtctggccaacatggtgaaacccgatctctactaaaaatcca  
aaaattagccggcatcggtggcaggaacctgtaatcccagctactcaggaggctgaggcaggaga  
atggcttgaacccgggaggcggaggttgcagtgagctgagatcctgccactgcactccagcctgg  
gcgac  
>chr9\_132698579\_132698779  
TTTTATTCCCTTTCCCTCTAAGAATGCACTCTTTTGCCACAGACAGGATGCCTGTAATCATTATT  
CAGTGAGCAGCAACCTGCAGCAGCTCCTCCTGACTGGCAGATGGGCCTGGCGGCCACCCAGAGGC  
TGGGGACACAGCAAGAATCCAGCACAGCACCGATCCCGATTCCCTCCTCCCCAAACTACCTGAGC  
CATGG  
>chr12\_45048333\_45048533  
aggatgtcagttccTATTGGAATGCAGCTATTCCACAACCAGATTCCCTGACCCACAGACACAGTA  
AGGAAACACTCTTCAAGCAGTCAGTGTGGCTGTGTCTCACCCCAACAGAAGCACACAGGAGAGAT  
GAGGCTTCTGATTTGGGGGAAGAACTCTATCTCAGGGCCAAAACCATGACTTGTTCATGAATGT  
GACAC  
>chr13\_35509600\_35509800  
atgggtttcactgtgctagccaggatggtctcaatctcctgacctcgtgatccgcctgcctcggc  
ctccaaaagtgtggtgattacaggcgtgaagccaccgccttgccTTAGATCACTTTCATCTGGG  
TGGGAACATGAATATATTCATGAAAACGGCACTTCCACTGGCAAGAACTTCAGTAGGGGAGATGA

GAAGG

>chr16\_88291899\_88292099

ACAGAGGAAGGGATTTCAAGACCACCTGCTGACATTTGAGGATTTTGCTCAAGGAAGTTCCTGG  
AAGGGAGGGGCCACTCCCATGAGACAGCACAGCTCAGCAGAGCTGAATGGCTCACCCCCCACC  
CCCCAGCTTACCCCCTACATTGCCGATGGCCTTCTCTGCCAGGGATAGGGGCCCTGGAGCCATCG  
GCTAA

>chr17\_18312675\_18312875

TATACGAGGAGGTTCATGTTAAGTATTCCACAACAAATTAAGAGATGATGTCCATGAAGTTATCT  
ATGCTACTCTATATAACAGATGGAAAAAGCTTGGGTAATATTCAGTGCGGATACTGACTTGTGTT  
CCTGACTCATAGGCGGTGCTCAGACACATTTAACCCACTGTCTGACAGAATAAATGAACGTGTCC  
TGTA

>chr17\_71087405\_71087605

aaaacacaaaaattacttgggcgtcgtggtgtgtgcctgtagtcccagtgccctgtagtcccagct  
actcgggaggctgagggcaggagtaatcgcttgaacccgggaggcggaggttgcagtgagccgaga  
tcgcgccactgcactccagtcgggtgacagagcaaggctctgtctcaaaaaaaaaataaaaaata  
ataaa

>chr22\_28076200\_28076400

tacaatggaagctccccacagggtaggaacttttccaccgcttactactatctcagagcttag  
cccactgcctggcacatagtagatgctcaataagtacttgcctcaatgaGCTgtattcgcctggggt  
aacattcgatgctctaacaggttaagccctaagttctcagtggttaacacaatcattttgttctc  
tgct

>chrX\_137749134\_137749334

AATAGTCATAATAACGAGTAAACAGCAGGTTTGAAACATGGTATGCATAGTTATTCCAAATGTAC  
ATATATATCTTTATGTAatatatatgtattttatatatgtacacatatatgtgtatacatatatt  
atgctatatcatatattaggttatatatgtatattatgtatttatacatatatataaaatacgtat  
tatat

>chr1\_17662413\_17662613

CTGAAGGGGAACAGGTGTGGTCAGAGGCCCCAGCTCTGCTGTCCGAAGTGTAGCCAGACTTCCTG  
GGGCGGTGGAGGAGGGATGTCTTGAACCTGTGTCTCCTCTGAAGGACGGGAAGAGGGGCTCACA  
CTATGGGTGCACACAGTCCCCTGGGGAAACGACCTGCCCATTCAGGGCCAGGCTGGGTGCCCAA  
CCCCG

>chr1\_19679413\_19679613

CTGGCCTACCACCAGCCGCTTACACTGGGGCACGAGTGGGCACAGGGCATAGCCTGATGTGCCCA  
CGGAAGGGACCCCTGCGAGGTGCCAGCAAGCCAAAGCTGGCGGCCTTCTCCAGATGGGCGTGGG  
AAACAGGAAGACAAGGGTGCGCCCGGGGCCACACACAGGGAAGGGCAGCTGCCGCTGCTGCCGGG  
GTGAG

>chr1\_44018613\_44018813

TGTCTAGGCCTTTGGGACTgctgctggtatgtgggggctgggagagagggaggagtctcggttcc  
tggccggagccccggggtgatggtggtgccatcactgagatggagagcagggggagggacaact  
ctcagggagagctggagctcTTCCAGCAGCTCTCCAGCACGCCTTTTTTCTGGAGCTTGAATT  
GATGT

>chr1\_55279212\_55279412

AATGGATGAAAAGGAGCTGGGCAGTAGGGTGTGGCAGGTGCATGGTGCAAGAGACTAACCCCGCC  
CCGACCCGCTGGTTGGGGAAAGACTGTCTGTTTCCACCAGCCCTTGTCAGGGGGCCCTTGAGGCT

GGCCCGGCCTCCGGCCTCCGGGATGTCTGCACAGCAGGATAGTAAGTGATGCCCCATTGCTTTTC  
TCTGG

>chr1\_226661977\_226662177

tgcagatacacccagaaacagtgcttcaccagccatccaggcatccctcaatccaggcaagttaa  
cacctaaaattaacatcacagttactaatatgggaaaattggaggactactaataaaactcaga  
ttctcagcttcttttgatgattggaagatctgacatcactgtgcccagctagctgaatgataata  
gttgt

>chr4\_688200\_688400

cttaaataatctgctagccataataaataaatgaatgtacttttttttcttagctcccacaagtta  
gcctaaatatttgcctggcatacttatactgggccagcaagcattaggtcacagtctgttccct  
cttcttatttgaaggtgtttttacctttctcagcattccacaattacttctctcttctttgt  
tctcc

>chr4\_81383176\_81383376

ttaccaatctaaatcctttggccatcctgggattcccaaagggcagtaaccatgctaatttaac  
caaccttgatccccaacacttagtgcaGTACAAGACAAATGGGCATTCAAACCATAGTCTCAA  
ATGAGAAGATAAATGCGTtttctctcttgtattttcaacatcttcttttctactgacactttcc  
cttag

>chr5\_115200301\_115200501

tcttgctgaagaaaaccgtgtctatatgttgagcatgacttcacaggatttatgacacaaccaat  
caaagaaatcatggaagagattgtgaatgtagcaaaaaagtgaggagaatgaagggtttcaagat  
aagggtttcagagaaatctaagagcgcatagcacaacagagtaattagcagaacacattttgatg  
gagat

>chr5\_129492101\_129492301

tttgcattttcaaagtgttttgtctactattaattagcatttcttctgcagcataacctgtgagatg  
ggccaatatcaccattttacagatcagaaaagtggaatgacaaaggctgagtgatttgaatgaag  
gactataacaagtcaaaggcagccaaggatggatttggcaccagcctgggagttcaacatat  
catgc

>chr5\_139021216\_139021416

GGATCAGGGGATATGAAGGGGGTGTCCCCTCTTTAGTATTTCAAGGGAAGTAGATAGTTACAGCC  
CTACCATTCCCATTAGGCCATTTGAAAGGGAAAAAGTTACTTCCAACAATAAACAGTTCCATC  
TAACCACAGCCCCACTGCTGCACTCTCCCTTGCTGTAGTCTCTGGGCCTCTGGACACAGTTGCAG  
TCTCT

>chr6\_9086201\_9086401

ATTCAAGTTTTTATTCAACCAGTTCTTAAAAATGAGTTCTAAACAAATAGTGATTTTGCATTAGC  
CTGCAGGAGGTCATCTCTTACAATGGATTTCATAGTGCTTTGCCGGTGATGAGAATTCTCACCTCC  
ACTGGGTTGTGCATCAGGAATGACCTCGTCACTCTGCTGTATCACAGATGCACCCCCATAATGGG  
AGAAC

>chr6\_143377107\_143377307

TTGCTGGATGTGTTGGGTTTGGATACATGCACACGAAGAGAGCATTCCAAGCTTGATGAGGAG  
CACTGGTAAATGCACTTCTAGTACTAGAGAGTGACGGAGATGTTTTGCATCTGTATGAGATCATG  
CAAGACTCACGACTCATCTAGACCCTAATTTTTCTAACACTTTTCAATGACCCTCCATAGAATCC  
TCGGT

>chr7\_15821475\_15821675

taatagacatgaagccagccatgtcacctcaaatcagtcctccttgaagccatgtagtttagcggtt



ttacaaagggcacttgctgctgataggtaggatggagacaaaatcataagttgttctcttgagta  
tagttgtttctgggtggggccacggcaatgggagtcagcaagtacagatggagtcactgtgtcCA  
CATAc

>chr7\_30394075\_30394275

TTcCTTCTTAATGTGCAGTCTCAAATGAATAATTAAAGGGAAGAACCACCTTCTTATAGAATGAAT  
TTTTCTGCAGGTACTCTTACAGATAATGTACACAATCAAATTTGTTGGTTGGTTTTATAGGAG  
GAATGGGCATATCAAACAAATACTTAACTTTAGAAAATGTCCCTGCCTTTCTGTTTCTTTCAGAA  
TTTAC

>chr8\_7441190\_7441390

CCTGAAATTACACGTCTACTTTCTTTCCAGGCTGGCGCTGAGATGGGCAGGTGCTGCAGCAGCC  
CGGCTGGAAGCGATGCAGCATCCAGGACGACGGAGGAAGGGGCAGAGAGGGACCTCCGCTTTCCA  
GGCTGCCTTTTATACTGCCTCTGGTCACCTGACATGGAACGTACCCTAACCTAATCAGTTACCTG  
TACCT

>chr9\_33415400\_33415600

TCTACTCCCGCCCTGCACGCCCTACCCACAACCCTGGCCCTAGTTGAGCCTCTCACTCCTTTC  
ACAGCAGCTGAGGCAACCCAGCCAAGAGCCTCAGTGAGATGGGTTTGGGTAAGGTGGAACCTTAA  
CCCCAGACTCCAACCTCATCCTGTTTTTCAGCACCCATGAGACTGGCTCTAGCACCCCTGCTG  
GCAGC

>chr9\_132268579\_132268779

ttctgcgagatgttaccattggggaaactgagtgaaggcgggtacctgggatccctctgttttct  
tttttgTTGttgttttatttttgagatgaagtttccctcttgttgcccaggctgggtgateccacc  
tgctcggcctcccaaagtgctgggattacacgcgtgagccactgtgcccagccTCTCTGTTtta  
tttct

>chr10\_48431194\_48431394

AGCTCACTCCGGTGGTAGCGGTGGTGTATCTGCAGCATCTGGGGTTGACCGATGGATGGGGTGAA  
AGTTCACCAATAATGTTGCACCCCCCATCCCCAAGCTAGAAAATGCCCTAGGAACCAAGCTCCC  
AGGACTCAGTGGCGCCACGccctgaaccttgctttcccatctgcctcacagggacaacagcctc  
catct

>chr12\_1953139\_1953339

AGAGCAGGGCAGCCCCACTGACTTAGTGAGTACTGCAGCCCCAATGAAACCACCCGCTCTGGGTG  
GTTTATGAAGCTTTCACAGACATGCAGGATAAATAGAAGAATCTTAGAGATGGACTCTTCTGATC  
TCATATTTGGAATTGGGGCTAGAATCCCATGCTGGGTTTTTAACTCCAACCTTTGATGGCTGGCT  
AGGGA

>chr14\_67665647\_67665847

TAAACACTGAGCTATTACCTCTAACTCTTAATACATTCGAGAAGCTGCTCAGCTGATTTACAGA  
GGGGTGACAAGGGAGGACAACAGACACTTCAAAGGCAAGAAGAGGATGGCAGGAGCTCTTTTGC  
CATGGCTACCAGGCCGATCTCCGAGCGGAACCAGGATGCCACTGTGTACGTGGGGGGCCTGAATG  
AGAAG

>chr15\_40530308\_40530508

gcggaagactgaagactcacagcctggacttttaaccaaacaccacatggcttcgctACAGAAGA  
AAGTTAGAAAGTTTTCAAAAATAAAATGTAGAGCCAAGTGCCACCTTGGATATAAGGGACTGGGG  
GACGGGAAGAGGCAAGAACTCCCAGGCTTCCCTCTGGCTGTCAATAGCTAGTGGGTCCTGGCAGT  
GGGAG

>chr16\_19328299\_19328499

CCAGAGTCATCACTATTTGCTTTACAATAGAAAGAATCCACCAGTCACATGGGCCTGTCAAAGCC  
AAGACTTCTGGGGAGCATTGGTCTGCATTAATAATAACAATAGATCCACTAGGGTGAGTCTCCAGC  
TGCGCTGTATGTGTGGATGCCAGGGAGAGATTGGGAGAAGCCCTGCAGGAGCCCTCAGAGACTCC  
ATATG

>chr16\_84592099\_84592299

GTTTGGAAATTTAGCACAAAGTGTATCACTGTTCCCCGATCACTTTGTAAGCTGCCTTTTATACC  
TGCCTTTATGTTCTGGGGTTAATAGAGCCATCACAGCTTGTCTTGCCTGTGCGTGCACGCAGTG  
GTGTGGCCTGTCTCCGCAGTGACACCGGACATGGGAAGTCTGGGGATGAACCAAGGAGCAAAG  
AATTC

>chr17\_77025805\_77026005

GACGAACAAAGCCCCTCACTGCTAGGAAACGGGTTCTCTCTGGCTCGCCTAATTccagcctggat  
gaagtgccaccctgctgggctccctaccacctgtgctggtcctggtcctaacacatcccatacca  
tagctgccagggactctactgcccagggaaggatcctgttccggtcgtcccaagaatccag  
ctccc

>chr19\_10196200\_10196400

gttgccatctctgtgtceccaggtgggcccagagccccaccacctaagggtccctgatgtgccc  
tgtactggggttagaattgtccgTCCCACGGGGTTCTTAACCATTGCAGATTCCCTGGATCCCTGA  
GACAGCCGGATTCTACCGGGCTACTAGAGACCAAGAATCTGTATTTTTCTCAAGCACCGCTCCCC  
CCAAC

>chr22\_26966000\_26966200

aaagaaagacagaaagaaagaaagaaagaaagaaagaaagaaagaaagaaagagagaaaa  
aaaTTAATTAATCACACTTTGTCAAATGCTGAGGAATGGTGTGCTGGCTGGGGTATGCTACCCG  
CCCCACTCCACCCACACACTTTTTTTTCCCGGCTGCTGCAGAGGAACACACAAGACTCTTTGCA  
TTCAT

>chr2\_85683889\_85684089

TGACCAGGGGCAGACTTAGCTGTGTAAGGCTGGTCCAGACTCCTCCAGCAGTCACATAGATCagc  
tttaaatgtgcccacgaatccctgggcttcttgtttaaatgcacattccagtgggtgagcctggga  
taagcgggcatctgtgtttctaacaagctcccaggtgatactgatgaccacactttgagtaacg  
aggAT

>chr2\_135583330\_135583530

aacggcgcaccacgagattatatcccgcacctggcttgagggtcctatgcccacggagtcttgc  
tgattgctagcacagcagctctgagatcaaactgcaaggctgcagcagggctgggggagggcgcc  
cgccattgcccaggcttgcttaggtaaaacaagcagcctggaagctcaaactaggcggagcccac  
cacag

>chr3\_183544706\_183544906

taggaataattctgggtgcCTTCAGGAGGTTTAGTGTGGTAGTGAGGGACGGAAGGAAGTGTAAAT  
TGAAGTACAAGGCCAGGTCAGCATGAGAGGGAGGCAGGCTGGGGAAAGCTGGACTCGCCACCTG  
TTGTGAGGGAGGGTGGTtgggcccaggtgggaatgtaggtcacgggggaggagggttcagctgagg  
tagca

>chr5\_714800\_715000

ACACTGAGCCATCTTGTTCATCACTAATCAAGCTCTGCCCTGGGAGCTTGCTCTTtgetgtgg  
tttgacatctgacccttccaaaccttatggtgaaatttgatctccattggttgagatggggcct  
cataggacgtgtttgtgtcatggggctggaccccctatgaacagattaatgccctccctctgaag  
ggagt

>chr5\_128734901\_128735101  
CCTCCACAAAGAGCTGTCACATGACTTTGGCACCTCCCAATTCTTCCCCCTGTCACTCAGCTTTT  
AGACAGAAGCTGGCTTTTTTCTGTAGTCCTTTCTTACCTAGCGCATGCCTGAAGCCTGGAAGCT  
TTGCTGCAGGCTTAAATTCTTAAGTATGTAAGAGGTTATAGCCATTCGAGGAAAAATACCAATA  
GGCAA

>chr6\_15208221\_15208421  
gaggatcactagagccagagagattgaggctgcagtgagctatgacctcaccactgcactccagc  
ctgggctacagaacaagaccagctctcaaaaaaaaaaaaaaaaaagagaaaagaaaaAAAGAGGA  
CTGAGTCAGCCTTTTCACTTATTATCCCTCTGGCCCTCATTCCTCCTTTTGGTTTGAGAACTAAG  
GTTTT

>chr6\_73839479\_73839679  
CTTAGTAATGTGCTGCTCTATTTCCCTCACTCCTAGTAAGTTCTGTAGTAATAAGCAGAAGCTCT  
TCAGAATGTACACCTCACGGAAGCAGAGGTACCCAGCATCCGGGCTATTGACATGAGATTTGAGA  
ATGCCAACTAACCTCAGGTGCATGACCAGGTTACACCGCCACCCACCTGAGCCCTGTTGAGAGA  
CTCAC

>chr6\_133289107\_133289307  
AGTAGTGACACATGGAAAGATAAAGCTATTTATTCTTTTTAGAATAATggtttagcaactacagc  
ctggccaaaatccagccattcccctggtttcataaataaacttttattggagcacagtcattgctt  
atgtgaaaacatagtgtttatgactttcatgattcaatggcagaggtgagtttggagcagaga  
ccgtt

>chr6\_142469707\_142469907  
cgctgtgactacatttgctgcatttttggagcttacatacaatggaggtagagagtttcaacaat  
atagagtctatcatacatagagtattaaaagcttatgaagacaaatagagcaaggaaaaggaata  
agagtatcaggagtagtggtggcagggagtgagatgggatttcagtttcatagtggtcaggaac  
acttc

>chr7\_139654931\_139655131  
TTAGTACCTGGCTGTGTTCTGGTTGACCACAGCTGCCTGAGGCTCGAAGGTGGAAGAGGCTGTGC  
CCTCCTCTCCTCCCAGGTCTTTGTTTAGACGCCAGGTCTTCGTGTCTCCTCCCACCTCTGCCGT  
CACTGCTCAGAGTGCCCCATCCAGGAGCCATCTCCCTCCACCTCCCCCAGATCTGCAGAAGCT  
CCTCT

>chr10\_83660820\_83661020  
CATGGTGAAGTCGGGAGCTCCAGATAGAAATCCAAAGAGAGAGAAAGACAGGGGCAGGGAAGGTA  
CAGTGTGGAATAATGTGGACTGTCTCACATGACACTTAAGAGGTCATGTGATGCTAGTGACTTTG  
CTGATGTGTCAAGGCTAGGGCTGAGAGGCTGTGTCCAGCACTGTCATCTCCACTACCTGAGGCAG  
AAGCA

>chr12\_117556417\_117556617  
ctgggctcaagagtgaacttcatctaaaaaaaaaaaaaacaagaGTTCTAGAGTTCTAAAAGT  
TGATGTGCATAACATTCCCCTGGAGCCTCTGGTGTGCGAGGAAGGGTTGGGGACTCTGGGGT  
TACCTGTTAGAAACCCCAAGGTGATGGTGGAGTTGGGGTGGAGCAGGATGGCAAAATACTCTGCC  
CCCAC

>chr12\_131912647\_131912847  
GCATAACAAGGCACATCTTCTGGAGGTGTAACACGGCATAGCCACAGCGGCTCTATGGGCAGAGA  
ACCCTCAGACCCTGCAGCAAAGGACACTGTGCTCTGCCTGGATTCCCTCAGCACCTGGGTGAGCT  
ACCCACCCTTGGTCTCCCCTCCAGTGGCCTCACACCAGCGCCATCCCTGTCTAGGCACAGACC

ATGTG

>chr13\_108215199\_108215399

AAAAAATTACCTTCCAGGCATTTCCCAGTTCCCATGAGGAGTTTCTCTGTGTTCCACTTCCTAA  
CTGCCAAAGTTGACTTTTTGAAATGTTGGAGCTGAGTCCTTCTTAAACTTACATGAGTAGGCTTT  
TTGAATTCAGAGGTTGGAAGGCTTCTTCAGATGAACAAGTTAATGTAAGTAAAATAGGTTTAATG  
AGTTT

>chr14\_78121247\_78121447

GCTGGCTCTGAGCCATCCTGGAGATATAGGCTGGCTTAAACCTGGAAGGGCTCCTGGCTGGCCC  
TGGGATAACATAAAGCAGGCTAAGGGACTTAAAGGCATGTGGGAACACAGGGAGCTTGGGAGGTT  
TTGCTCTTTGCTTTTGGAGTTTCTAAGCCAGGAACAACAGGATCAGATCTGTGTTCTGAAAAGCA  
GGTTC

>chr16\_52344499\_52344699

ctatcactgcaggacagtgccccctaaacttagtggcttaaacaacaacacgtaaaaaacacag  
gtttccttaggcactaggatctgggcacaacttaattggatgtctttgtctcagggcctttcacag  
gactgcatcaaagtgtggcaggctgggactgcagtcaccttcaggttgatgggacaagatggac  
ttcca

>chr17\_35969487\_35969687

CAGGCCCCACCTCGCCGCGGACCGGGCGATGGGGCGGGGCTCGCGCCACGTGACTCCCCCGGC  
CCTCGGGGAGGCGTGGCGCGCCACGGCACGTGACCCGGCGCCGCAGGGGTCCCCCAGATTCAAT  
TCTAGCTCTCGGGCTGGTGGGGCGGTTCGCGGGCGCCTCTCCAAGGGAGCTGATTCAATTGTCTGGT  
AGGCC

>chr17\_55859601\_55859801

TTTGGAAAGAGGAAACATCCGGCTCCTCCTCCCTCACATCTCTGCTTCTGGGTCTGGGCTTGTGG  
GTCCCAGCTTGGGCTAAGGAGGGCCATGCTCCGGGTGGGAGCAGCTGTGTCCCCACCCCTCCTT  
CCCATGCGACTTGAGGCCCTCTGGTTCAGGACTGGAGCTGTCACATGCAGCCAGCAGCTGTGGTGG  
CGCCA

>chr19\_709000\_709200

gcccccgcgccgagccccggccgagccttagccccgccccggccccgcccagggcgcgctc  
cccctcccctcccctccccgcgccaccgcgccccgccccgcccggcaccgCGACCCACCC  
GGACCTCGGCGGGGAGATGGAGTGGAGTAGGCGCGCTCGGGCCGCGGGGCTGGGGGCCCGGAGCTC  
CGGGA

>chr20\_12576800\_12577000

actcaagctgatttagtaaataggaaatatataggcttgaggagctaaaaattcaggctgccag  
tctgtcttttagtcactatgaactccatcagctcaaatgagatcccagggtccagctttttctctc  
tttctcttgagctcatttcccctgtggtgatatttctctcatggcCACAAATGGATTCTGATGC  
TCCAG

>chr21\_33286729\_33286929

aaaaaaaaaaaaaaaaaaaaGACCCGGCCCTAGCCCGCAGTGAATGAATGCTAGCCCTTTGTTCT  
TACATTTTTACTCTTCTGCAGGGAATCCCGTAGAATTGTAGGATGCTCAGATGGTCTattagcct  
gctcaggctgccacaacaaaataccatggagtggtggtctaaacaacagaaattcatgtttca  
cagtc

>chr21\_38164930\_38165130

atgaggcacctgctcagagaactgaagttactcatccagggtcacatggctgtcaagaggcatgc  
ccagTACCTATGACAAACATTCATCCCCAAGTAACGAAGCCAACAACCTGTGTCTCACTCCAGAA

CCACAGAGCTGTTACAACACGTGGTGCCTCCTGAGCCAGCAGCCAGGGGCAAGAACGAGAGGATG  
CAGGG

>chr22\_49079288\_49079488

GAGGCCAAGAGGCTCTCTTGGCCAAAGTGAGTTTACCTGAAGGGACGGGCTGAGGCCAGAGCCAG  
GTCGTTGGGCCACAGACCGTGCACCTCGCTGGTTCCCTCCACGGCTCAGGAACAGCCTCCCCTGCC  
AGGACAGCCTAGGAGGCTGGGCCAGCACCTTCATTCAGTTCAACGCTTTCTATCACAGAACTGTT  
TTGAA

>chrX\_78621744\_78621944

TAGTTTAAATTACAACACTGGACCTGCTTCAGATCTCTAAATAGAGGGAAGGGGATGTTGTTCAA  
CAAGAAAAAATTTAAAAATAATTGAAAAGTATCCTCAAATTTATTTTTACAAGAGAAGAGTGTT  
TTCTTTAGGAAATACCACTCTAAAAATATACAAGGCTCTTGCAGTAAAAGGGCACAGTGAACACC  
CAACA

>chr1\_59168412\_59168612

TATTTAAAATTCCTCTAATCCTGCAACCCTAGGACTTGTGAAAGACTCATTTCTACCAAGTA  
GTTTGAAAGCAGAATGAATAATTCAGAATTAGTGTTCATGAACTTGTAGCATTCTActgtgc  
ttggtactgatgcattgaatgagattgactcagtgctgcccataaaaatcaatcaaatgTGCA  
ATTTT

>chr1\_180209177\_180209377

AAACAAAAGAACAACCTTCATCCAGAAGGCAGTTAAAAAGCAAAGGGAGTTAAAAAGCAAAGCCT  
CACAGGAGGCACATCAAGCTGGCACATCAAAGTACAACTTTACAAAATATTAATCTGGTCTCAG  
AGCATCGTTAAATAAACATTATCCCTTTTAAAATTATTATAatagaggtaggggctcactatgt  
tgccc

>chr2\_84540689\_84540889

GTCTCACCGGGCTGTCCTTGATAGAGGTAGCCTGTTTGTGTCATGTTAATGAAGAGAAAATTTCCAG  
TTCTGAGTTCCACAAAGACTGTTCTCCCCACCTACAGCTAAAGAGGGAGAAAAATGTCAGCAGG  
TAAGGGGTAGAATTGGAGTGAACCACTTCCTTACCTTTGGGAGCAGCTGGCCTAATGTCAATGTC  
AAGGG

>chr3\_57193160\_57193360

TTTTTTAAAGACACATTTACATTTATGCACTCAGGACTTCAAGTGTGAATTCTGTTCAACAGACT  
AAATTCTGAGCAAGATAATGGGCCATCTCAAAGATTCCCCCTTGGATTTGTTTCTTCAAGACTG  
GCCCTAGCTTTAATCTGCAGTAAGACTATCTGTTTCAATAGGATGTGATCACTTGAGGGCTTGTG  
TCTTT

>chr4\_3305802\_3306002

GCTCCATGAGGCCGGAATTGAGGCATTTAATGTGTGTGTCCTGATGCTCAGCCTCTTGGTTTCT  
TTGGATTTGAAATGTTAAAACCTCAAGAAGTGACATTTATTAAAAACCCACGAAAAACTATGCAT  
GATGACAAAATGCTGACCTGGGACATTTTATGTATTGTACTTTTCAGTTCAGCCTAATGTATTAT  
TCAAA

>chr6\_42151622\_42151822

AGTCCCTTTAAGTACAGCTGACCCTTTCAAAGGCAGAAAGACCACAGCCTGCAGCGTATTTGCTG  
CCATTTTTCTCTGTTGACACCACTGGTGAGGATGCCTTGGGGAGGAGGAGGCCAGGGTCCCTCCCA  
TGAACGCCCTCAGCATCCCGAAGTTATAGAATTATTGCTGCCCCCTGCCCCCAAACCTCCTG  
CCttt

>chr7\_6413875\_6414075

gcgccGAGCTGACAGGTTCTCTTAAAGCCCTGAGTCCCAGGGAAGGGACCTGCAGGCCCGGCCA

CGCCCAGGCCGCTTTAGCGCGCCAAGATGGCGGCTGCCACGCCCCGCGGCCGAGCCGAGTGGGC  
CCGAGCGCTTCCGAGCATTCCCGAAGTCCAGAGAACTCCGGGAgcggcgcgggcgggagcggcg  
cgggc

>chr7\_21579075\_21579275

Gtttgggtggacatgagtcccattaaaacttggaaacaggggtaaagtgcgtatttccaagagaag  
gaaaaggtgaatggacactggggacagtttagcagtttctgctacaTCATCTTCTTTAAAAAAT  
CTAGCTATTATCACAGCCctatgtgatttttgtctcatatttcttctttgtcctcatctctgtct  
attct

>chr9\_99835179\_99835379

GAGATGTGAGCTGGGGTCTGCAGGGTGCCTGTGTGTGAGCGATGTGAGCTGGGGTCTGCACAGTG  
TGTGTATGTGAGCTATGGAACCTGGAGTCTGCAGGGTGTGTGTATATGAACAATGGAAGCTGGGG  
TCTGCAGGGTGTGTTTATGTGAGTGATGAAAGTGCCACCCTGATGTGTGTTTCTGCTCTAGAATA  
GCTTC

>chr9\_102485179\_102485379

GAGGCAGGGGGAAGTAGCATGTCAGAAGAACTGTGAAAACAGTGGGATAAATCGGGAATATTAC  
AAAAAGAATAGACCCACCCTACTATGGGACTGTGGTTCAGAGCTAGCTCTCCAAGTGTGAAACCA  
CAAAGGCAGCTATCAGAGAGTGATTCTTCACATGCACCCCTCTGTGCACAGATGTGGAGGGGC  
AGTGA

>chr10\_47694794\_47694994

AGTTCATTCCTAAAACAAGCTCGGATGAAGCTTCCAACCTGGCTGCTGCTACATCTGCTTTTAA  
ATGATTAGAATattccctaactactgggtctaattgcagaactggaatatgcagtgggcctatggt  
tccccatggtcttgagtaggaacttctaatacctgattggtgtggtcatgaacaaccaaggtaa  
aaggt

>chr11\_12482824\_12483024

TTGTATCTACATTTCTATGTAATTAGCCAGCTTACCAGGTCAAGTTCTATGTTctccccaggc  
cgttacaaatgctcagggcatgtggacacacacagatgcacacccacgcacaaaggcatggcact  
tcttctctaagtaggagcagacttttaaccaaggaaatggttctcattctcaatctaaaagat  
aacag

>chr11\_122394790\_122394990

TATAGAAACACCATGTCACAAAGCTTTTCAGACAAAGACGTAGTGGGGGTGAGTTCATTGGGTGC  
AGAATAGAATATTTTGTGATGGGTGCATCCAACCCATTTCCACCCCCCAACTCCTACATGCTCTG  
ATAAAAGTCAGATCTGTAAAGAACTTCAAAGGCTCCCCAGTCTGACAAACAGTAATAAAACAAGA  
AATCG

>chr12\_97855669\_97855869

CTTCTGGGGAAGGAGAGTTCCATCTCTTATTTTAACTAAATGACAAGCTACTTTTTGTTTTTCTA  
TTCCCTGTCTTCTAGTATTGCTAAACAATCAAATGCAAGGTATTTTGTCTTCTTTCACTCCTTAA  
AAGAAAATCAATCAATTAATACACAAAGATAAAAGTGAGAAACCTACTGTAATCTACTAAGGTCC  
AGGAA

>chr15\_41058908\_41059108

CAGGAGCTACTGGGGCTCAGCCTTGTGCTACAGAACTGCAGGACAGCCAGGGCAGTGAGGGGCC  
TGGAGGCTtatttttttttgaaatggagtctctgtcgccaggctggagtgcggtggtgcaatca  
tggctcactgcagcctcagcctccTCTACCTGGAAGCCTGGGTGGGGAGCAAGCCCAGGGAGGG  
CGGCA

>chr17\_41996474\_41996674

GACACCTCTCCAGGCCTCTGACTTAGCTAGATCTCCACCATGTGACTCCACCATAGACTCCATGC  
CTTCTTCTTTTGCAAACCCCTCGGACACCCAAACACCTACCAATTTTCAGCCCTTTCTGTgcaggtg  
ccggagcccaggaagcacacatcaaggctcgcttgccagcaggggtgctgccaataaaatgtagtc  
acatg

>chr2\_85683689\_85683889

CTCAGCTGCATCATCAGTCTGAGCACCTGACGGGTGCTGGAGCACACAGCATAATCCCCACAA  
ACAACCCCTTGACTTGACTTCCCTTTTCCACTCTCCTCTCACCGCCCAGTCCCCAGCTCTGTCAGC  
CTCACTCCCCGCTGATGGCCAAGCTTGTCTCAGAGTTGCAGGTAACCTTGGCATTGTGCCAAAC  
GTTGC

>chr2\_184375955\_184376155

gatgcctgtgtgtttcccatctgaaagacaaaactgcctgtggttttggtttggtttccccctgc  
ccaaggacctgcaacagtcacctggacctgctgataggaatggttgctcactgatgcagcagc  
agaaatacctctcactcaagaacctcaatggtccctggacctgctgattgaagtagttgcact  
cacca

>chr3\_78946510\_78946710

ACACATCAAAAGCAATTTCCAGGCAGGTAGCATGTTTAGAAGTCAGGACTTGAATCGCTCTTAT  
ATATCCCTACATATCCCAAGTAGTTAGCATCTTTGTTCATTCGGTAGATATGTTTCATCAGTTGAGT  
TTACAGAACTTTAAAAAACAGTTAATTACAATCTTAAATTAATGAGATACCTTTTGAAAGGACTT  
GTGTG

>chr5\_126664501\_126664701

TCACACTTCGTTGAAGGGAAATACTTCTCACATAGATAAAGCAATGAGACAAGGAAATAATTGCC  
ATGCTCATTTTGTACAGCCAAATATATTAAGATTTTTTTTGGATGGATGAGGAAAACACTAGCTGT  
ATATTACACGGcttcaactgtaaaacagggacaataaaaaactactacttcttagttaagttgctg  
taagg

>chr5\_141122816\_141123016

TTCTCCCTGGTAGCAGCATGGCAGATTCTGAAGTCACAAAACTCCTCGCTCATCCTGAGAGTAG  
AGAACTCTACCCAAGTTACTGATCTACAGGCCAAGCCACGTCGATCTTCTGTCCCCACTGTGAGT  
GCTTATGCACCCTGGGCAGAGGCCCTACACTGCCTTTTTCGGTAAAGGCAGCTGGCCCCCTAGCCCTC  
CGGAT

>chr6\_24693421\_24693621

AAATTGTCATCCATTAAGATTGTCTGTTTTTCTTTGTGCTTCTGTAGACAGTCTTCTTTTGGGGG  
TGGCTCACGTGTTTATGTACACAGATTTTCTCATAACCATATGTCACACTCCTGTGCTTGAGGCC  
ATTACAGACACCCTTACTGAGCCAGAGACATACATTCCCTTTATCTGTTTAGCAGAGGCAGTGGAG  
GCAGT

>chr7\_100241064\_100241264

CTCTGAAGCCCCTCCCCACCTCATCCTCCCCTCCTCGGTCTGTCCCCTTTCATATTCAGAGGGAG  
AGTATCCTCTTCATATCATTCATCAATAattcattcattcaacaagtattattgaacagcagtc  
tctgccctgagctaggccctgttctgagctggggggatggcaCGCACAGCCCCAGGCCAGGCCAA  
CCTGC

>chr10\_14372194\_14372394

CAGCCAAAATCCAGACTTAGGGAGCAAAGGCTCAAGGGGAAGATAGGCCACCTTTCACACAGGG  
TGGGGAGGAGGTCAGGGAAGACAGGGTGGGAAGTGTGCTTAGGGAGGAAAAAAAAAAAAAAAAAGA  
AGGAAAATAGGAAGCTGCAGGTTATTTAAAAGTGAGCCCTCCCTAGCTTCGCAAAGCGGCACAGA  
CAGGG

>chr11\_6496824\_6497024

cttcattatatgctagcctctctgcctgggatgctccttcctttaccctgcctgtttgtcatcta  
ctcacccttcaggtctcagcttttttttttttttttttttttttgagatggagtcccgctctgttgcccag  
gctggagtgcagtgggcgcaatccttggtccactgcaagctccgcctcccgggttcacaccattct  
cctgc

>chr11\_113731790\_113731990

agatcgcaccactgcattccactccagcctgggagcaaaagcgagactacacctcaaaaaaaaa  
aaaaaaaaCCACCTCTGTCTGGACAACAGAGATGGTTGCTAACCTTTCCAACCTCCATAAAAACAAGG  
AATGGCCCTCAAAGCCTTGGTATTTTTTCAGTTTTTCTTCCAGCAACAATGCCCTGCTGATCCA  
ATTTA

>chr13\_40153000\_40153200

tcatggataagtcaacattcaaaccaggccttaaaaggcaaataggtttggggtctgtgaagaga  
ggagagaaaaggtgaaggaacagcgttcagcaaaaggcacaacaatgttattctaacttatgtaa  
cctctcgtgtaactagtgcacaagaacatcagaagattcagtggtgctaaagtagaataaaca  
gaccg

>chr14\_74881447\_74881647

atgctcgtgttgactcTAGATTCCTGGTAATAGAATAACAACAGGATAGAGGGCCTCCTTTTTCA  
GCTGGGGCAGACTAAGTCATGTCACGCCAAACCGCCAATAACAGCTAGAAAAGTGGTGTGTGGTG  
GGTGGGTAATAtgaaggcttcaaggaatcaccaaggagtaagaactggagggtcagaatgccaa  
gatcc

>chr15\_50350308\_50350508

TCCTGGGGCATCCCTAATGATCTGTTTGCCTCCTATCTCTGCTGGCTAGAGCTCATCTATGCCTC  
CTCCTTTTAAATCAACTGGGGATCTAGGGAGTCAGCCCTCAGCTTTGGCCCACGAATTCGTCTTA  
TCCTGAGCTTTAGGGATCTTGTATGATCAGAGTGGGCATTTCTTTGAGTTGAGGTGGGGCTGGC  
TTGTT

>chr17\_32297287\_32297487

gaaccagtgggtagttggatacctttcctcattctcgaagcccaggcagcacccccacttaaact  
TCTGGAGCTGTGGATGCATCTTGACCAGGCCACGCTCTCCTTGGTCTCTGCCTAGTGGGATGCTG  
CACTTGGAACACATCCCAGAGACAGGCAGTGCCACACCCAGCTGTGAAACACACTGCTCCCCTG  
CTGAG

>chr17\_77834205\_77834405

GATACCATGCTCTGGCAGCTGAGGGTAATTACGGGGGCTGCGTCCTTGAGGACGGGTCTGCGCAT  
GTGCTTCTCGCGGGGCTGGTGGCCAGCCGGGGCGGCCTCGGTGCCGTGAGCTGCTCGGTGAGAT  
GTGAAAGGCCGGGGCTCCGCGTGGGGCCTTCCGTGCTGCAGCAGAGGCCTGGGATTGGAATGCCA  
AATCC

>chr18\_10087200\_10087400

gggacacagaggctgttttcacaagacttacagggtggcatgggaatgcagctttgtaaacaggt  
gatttcagcacCCACCGTGAGTCTCAATAGAGACCATGAATCTGCACAGGGCAAGGAAGCGCTCA  
CTCAGCATACGTATGTTAGGGGCAAGTTATAGAATGGTTTTTAGAGTTACAATCCTTATTTAATG  
GTGAA

>chr18\_57246820\_57247020

ATTTATGACAACGGTCTACATCAGACAACACACAATTCAGAGGGCCCTCGGCGGTTCCCTACAT  
GCTCTATGGTGGCAGCCACCTGCCTGGAGCATGCCAACAGAACGGAATGTTAGGCTCTTACTGCG  
TTAGTGTCTCTGTCCCTGAGATCTGTCTGGACTGTCCCTGAACAGCAGCATTCAATTCCTTGTC



TCAGG

>chrX\_21858879\_21859079

AAATGAGACTTTTCCTTCTATCATTTAACTTGTAAAGTGCAGGAGGTTACATAGCGTAGTCCTT  
AGATCCAGGGCTGGGCTTctagccaatgtgaccttgggaaaattgctatctgtgccttggtttct  
catctttaaatagagataaatagtaaggatctcctaagattacagagagaattacattagtgatc  
cacat

>chr9\_115610379\_115610579

AAAGTCTCACTGTGCCCTTCGCCTTTTTGATGTGTCAATCAATGGGATGCAGATCCCTATAAAG  
TTCTGTGAGAAGTTCAGATGATGACTCTCTTCTGCTTGTCACTCAATGATGGAGGGCCTCTCTG  
CAGACGCCGGCTTGGTCTCTTGGCCTCTTTACCCCACTGCCGGCTCGGGCCTCATCTGACAGCCA  
TAGGC

>chr15\_35312708\_35312908

AGTTGCTTCAGTCACAATCAATGGTCATTTAACTGCGTCTAAGGAGGTCAGGTCTTAGGTGCAGG  
CCTTTTGTGGCTGATTTGCTTTCAGATTTGGGTCCAAGGCATGCAAATGTCCCTGTTTAGGA  
TCACAAAGGAGTCACTGGGGAGCCACCAGCATTCTCTCCACTACATTTACATCTTCTCCAGACT  
TAATA

>chr9\_129109179\_129109379

gaacttggaggcaagctcagaagcaaggttagagtgacctgcaaggttaagtgaggagtgacaac  
gagaggttgagagtgagatggccttgaagaggggaggccagggcatagcgggagctagaggat  
gccatgacccagctagaggatgccatgactcccttgttaaggtaggaaagtgatcgaatggtg  
ctagt

>chr19\_7445600\_7445800

ACACTGatTTTTGTTtagccaagacacattactgccctctgctggaaaacctgtcataatgtctca  
tatacaagcccaGAGTGTCAAGGACAGGTGGGCTCTTAGACGGGGTACCTGGTGTATGCCTGTAC  
TCGGTAGCACTGGGGTAGGTGAGTGGGAGAAGAGGCTGCCGACCCAGGTATCTGTCCCCTCTGAT  
CCTGC

>chr12\_117539417\_117539617

GTCTGATGTGGGGATAGGAAGTGGCATTCTCTGGACATCAGCCCCTCCTGCTTGGCACAGTTGC  
TCTGGTGGGGACAAAAGCCCTGGGACAAGGAGAAGGGCACATGGCTTCACATTGTCCCTTGGTGA  
TCTCAAGGAAGCCCTGGTATCTAGTATGAAGGGAGTCTGTCCCTACCCGATCACCTGTCTACCCT  
GACCC

>chr4\_76994976\_76995176

ttttactcaaaatTTTgtttgtgagatttatccacattggtatataatggtcagagtttgttcggt  
ttcattgctatataaaatTTcacttacagtctaaccattctactggtgatgatatttgggttcc  
agtttgggggttattatgaatagtgctactatcaacattctattaatgtatttgggtgatgtat  
gcgtg

>chr17\_14227075\_14227275

ATTTAGCAAACCCAGGAAAACATTGTCTTTGGAGAGGTTTGGAGCTTGATTAATCTCCAAAACGTG  
CTAATGGGGCAATAGAGAGCTCAGCTCTTGTCTCTCCTTCAGGTGGTGTTCCTGTGAGCTTA  
GTGCCCTATGTTCCAGCCCAGGGAATTGGAAATTGATTCATTTGGGAAAGTAACAGCTTAAAGG  
TCTTT

>chr19\_38984760\_38984960

atagccccacagcaccctagcctgggcaacagagcaagacactgtctctaaaagaaaaaaaggaa  
aaCAATCTGCTAGAATCTGCCTGCTCCAGCAGGTGGAGGGCGCAGGTGGTAGTAACCTGGGAAAA

CTTCTGGAACAGGGGGCCCTTCCACATTGTTCTGGTCCAAGGCCCATGTGCCGACCTGCCCTG  
CATGG

>chr6\_79290681\_79290881

cagctattaacaatgttctccctccaacaacactagtcctctgcactgtgctgtgtgatgctgg  
ggccatggcttaccaaattccactgatcctttgacaaggaggcttcctgttaggttctgccacca  
taaaggtactagagaggggactgcaaggctggaggaggaactgaaatactcctttttgctttgtc  
tctg

>chr14\_50275850\_50276050

ctaaaaaactcttaccatgtgattcaacaatattgatgtttggtatttaccaaaatgaactgaa  
aacttataatctgtacaaaaacctgcacagatgtttatagtagctttattcatattgccaaaacat  
gggggcaaccaaattcagtagattaatggataaactgtggttcacccagacaactgaatattatt  
caggg

>chr1\_197780977\_197781177

CATGCTTATTCAATTTGTTTCTTCTTCTCAGACTGGTTAAAGGCCAAAACCTGCCCTTCTTA  
TTTGTGTCCTCATGTTCTATGTATTTATTTGAATCATCCAAAGAATGTTAAGTATCATGCTCTCC  
TCCTATCCTGTACTTTCTTACCTCTGGGCCTTCTTGGGTAACAATTAACCTCATACTGAATTGTAC  
TATAT

>chr2\_61808696\_61808896

Attgcaccaacttaaatcccaccagcagtgataacatatccttaccagcatgtgttggttatatg  
atTTTTTTTcctTTTTgactatctgaaggtataaagtgggtgtttcctTTTTggtttaaatttca  
gttctctgattactaataaagttgtgtgcattTTTTcatatgtttattgaccattcaagtcctt  
ctatg

>chr20\_25768600\_25768800

ACGTTGCAAATGTTTGTCTAAATCCCACActctgaagtcagaaagacctggggttagccctcagc  
cactgacggttgcttgctatgtgacctggacaagtcactgcccttctctgagcctcaacacca  
catttacacaggggaagaataataacctcctccttgggctgctgtgaagcagagcfaatgcgtaca  
ttgcc

>chr21\_28642129\_28642329

TTTTCAGACTTGTCTCCTTCCCTCCCTCTCCCTTGAGTCACTAGTCCTGGAGCTTCTTGAGGTTG  
CTGAATCACCCTTATCTGCAGGCCTACTTGACCTCAGCATCCTTATTGACAGTATTCCTCTGCT  
TGAGGATCCTTTCTTTTCCATGTCATGTACCCATGCATATTCATCTTTCAATATCTGCATCTAAT  
AGGTT

>chr22\_50111996\_50112196

TTGAACCAGAAGCCCAGCCCTGCActccccctccacttccctttcttctcctttttcttcccttc  
tccttcctGGCAAACCTGCAGAAATACCTTGCTATGAGCTAGGCCTGGACTCCTATCTGTGCAGCC  
ACTCACAGTGGTCAGTtgcacccgtcagccactgctgcataacaagcaaccacggtaagtggcc  
tgaag

>chr10\_35814794\_35814994

CTTCTGTTTAAATATTTATGTTTCAGACTGTGGCCAGGTAATGTGTAAGGTCTTGAATATGCTCAT  
GGACACTGAACCTCTGCATTCTATTTTTACAGTGTGCTCTTGCAATATATTATCACATCAAAA  
CAGGTATGTGGATGGTTGTGTGCTAAAAACATCATAACGTTATCTTCTGTTATGTTGTTCCATTT  
TTTCA

>chr2\_78193492\_78193692

cctccttactatgggtaagcttccaccttccattcctccttcttctccttagcctgtgttctc

aaaaacttaaaacctcttcaactcacacctgacctaacttaaatgacttattttcttctgcaa  
tgctgcttgacccaatacaaaactcgacagtagttccaaatagccaggaaatggcactttcaatt  
tttcc

>chr3\_62905560\_62905760

TAGGAcagaagttctcaaaatgtggtgcccccaaccagggttatcagcatcacctgggaaccgaat  
agagatgcaaattcttgagccacatcccaggcctacttttagaaactctggaggcgggctcacct  
tagtcctacaagcactcctggtgatttcaatgcactcatctttgagaaccactgTCTGGGGTGT  
TCTGA

>chr11\_13025224\_13025424

tcaaagcccatatcaattcagagagccacatttcaagtattcaacagccccatatagcctagtggc  
tactgtattggacagagcagCCCTAAGGATTAAGACTGCAAAAGATCTATGATGTGCTGAAAGGC  
ATCTTCTCTATTTATATTAAAGTGATTAAGCAACCACAGTCTGAATTTTTAAGTACCTCCTTCAC  
CCTCC

>chr18\_45502202\_45502402

gcctgacctcaggcaattgcagagacgttaccaggcaggccccaggaaaagctgctctggcac  
accagagttgcagtacagcctggaggaagttgcagtcaaggactcagccccGAGGGTTAAGTAGC  
ACCCGCATTGTTACTCTTCTCTTAGATTTTCAGAGATGTTTTCCCTGCCCTGCTTCTATCTTATC  
TTGAT

>chr19\_29481560\_29481760

GGCCAGACAGTGTCAATAGCACCAGAGCACTCTAACACCTGGCAAGCTTCACCCTGAGCCAGGGC  
CCCCACCAGCCAGCGGGAGAATCTGTCATCGTGACAAGCCAACCTGCCTTCCGCCTGTGCTGCTT  
CACTGGCCTGATGGTTAGGGAAGGAAATTTGATCTCTCCTTCCCTGCCAGTTCTCTTAACTGCA  
GGCCC

>chr4\_188952406\_188952606

tagGGAAAGGGAACCTACAATGAGTCATAGACACAAATGTTAAAATAAACTAGTAAACATCTAG  
AAAAAAAAAACGAAAGAAAAggctgggtgcggtggctcatgcctgtaataccaacattttgggag  
gccaagtgggcagatcacttgaggtcaggagtgcgagaccagcctggccaacatgggtgaaacc  
catct

>chr13\_84505399\_84505599

atatgctaaacaaggggtgtattattcatgcctccccatttttagacatatagggtaacttctga  
cattgccatggcatttgtaaagtgatggcactgggtgagagtgtagcagtgaggacggccagag  
gttattctcatcgccattttggttttggtgggatttagccaacttctttactgcaacctgtttta  
tcagc

>chr6\_32983222\_32983422

CCTTTGGCTGGGAACCTGCTCACTTCCCTTAGAACTTTCCCTCCCGTCTCCTGACTTCTCTAAAT  
GCCAGAGTTCCAACCTCTGTCTCCTGGGAAATTCTAAGCTAAAATCACTCTTCTTTATATCTGC  
AGATAGTTTGAAATTTATACATCAAAAAAAGTAACTTTAAAATATATAACTGGTCTCATTACAC  
TCTGG

>chr2\_51000696\_51000896

AAACATTGGTGCAGTGCAGTACTAGCTAAGTTCAGTGAACCTCCAAGCTAATCCTGTGTTCTCAGAAG  
CTATAAGCGCCAATCTCTTACCTTTGCTCAGGGGGATGAGCTCACCACAGAACTGGCCTGTTT  
TTTGACCTCAAAATCCAGTTGGGACAGGGTTGGGGGATGGCAGAAGCAATGAAAGGGAAGGTTTC  
CAGGC

>chr2\_212528755\_212528955

TGAACCAATGAATTGGCAATTACCACTTCCAAGGTGAATTTGAATTTGAATGGCAGAATATTACT  
TTACCTTTTGAGGATCTGTCACTTCACAGAGTGAGTTAAGCTTATTTCTTGACCTGCAGGAAATT  
GTAGCAACATCTGCAAATTGATGTTTTCTTGGCAGGAAATGATGTGCTTGCTTAATTTCTTCAG  
TATCC

>chr8\_22638855\_22639055

CGGGGCTGGGAGTGGGAGGAGGGACACGGGGTGGGCTCCAGGCTTTTCCCCACACTTCCTCAG  
GGATCGCTTTACATAACCAGGGCTGCTTAGTCACCGCTTTTACTTTTTTTTTGGAAACAATTTT  
CTCAGCATCACAGCTCCCGTCTCCATCCCTTACTAGTCACCGGTGCTAGGGAAGTCCCTTTTCTC  
CCGTT

>chr1\_71054612\_71054812

atnttaaatcaggaagcggcctctgtttactctcttctccaacctccctcaactatccctcaacc  
tctttctcctttcaatcttggtgccacacttcaatctctcccttctcttaatttcaattcctttc  
atnttctggtagagacagaggagacaggttttatccgtggaccctaaactccggcgccggtcacg  
gacta

>chr10\_1463400\_1463600

TTACAGTCAAAGCACAGCCTGTGCACCTGCCCGTCCGTTCCATAGTGTGTTGTCTGCTGCTTGGTT  
TGTGGGACAGGTGGCTGGTCAGGATCTGCAGGACCTAACCCACCCACGCTCAGCTGTGAGGAGA  
TTAAAGGTCTCAGTGTCTCAGGGTCAGGTTCCAGGCTGGCTTCTTGCGATTTACAGAAAGTCA  
TAAAT

>chr19\_24221760\_24221960

tctcttgcctaatgcctatgcatgtggcaagggtgcctttggcttgcttttctgcctcctctaaa  
cctaaatctgcagttcctaaatcttgagtcagCTAATAGGGTCTCCATTCTGTGTTGGAGCAGT  
CTTCATGTGGGATTTCTCCTCTACTTTTCTCCTCTCACTGTAACACAATATGGAGCCAAGTTA  
ATGGT

>chr11\_22360424\_22360624

GTTTTGTCCCTTTACTACACAGGATTTATCTTCTTTACAGTTAAGAAATGGCCAGCCCCTGCTCA  
AACAGCGTTTCTTTTGGTGTCTTATAGATACCCCGAATTAATTCCTTTGATGCAGACAAATGAAT  
ATAAAACACAACCATCTAAAAAATAACCAAGAAATTCCAAAGAGTAATGGTTtatatatatata  
tatgt

>chr1\_160780576\_160780776

gacttgagatatgattcaccctgaggcaaaattcttcttcagttgtgaacctgcaaaaccagaga  
agttatctgcctccaaaattcaatggtggaacaggtatggaatagacattgccattccaaaagag  
agacattgggaagaagaaaaaagtacaggtcccaacaagtccaaaacctaacagggtaaatc  
catta

>chr20\_61075205\_61075405

AACGGCTGTGTGTGTGTGATGGGCCGGAGCCCGGGGAGTCAGGAGCTCAGACTCAAGTGAAGCT  
CAGAGTGAACAGGAAGGGTCACAGCCGCACCGTCCCCAACCCACAGGCGGTGAGAATCCAGAGC  
GTGGGCCAGGGCTGCCCTGCCCGTCCCGGAGAAAACGCCCGGTGTGTGCGGAGCTTCA  
CCACC

>chr12\_67966533\_67966733

CTGGATCTCTGCCACTCTGACTTGGCCACTCCATTTAGAGGCCCTTGTGTTGCAGGGCTTTGGTCA  
GGAGCTCTTTTATAGGCCCTGCCATGCAAAGAGTATAGTTATCATGTGAAGAAAGTTTTCTCTGA  
CCCCTGAGGGTACAGAAAAGAAAAGGCTTGTGTGAGTACTGAGTGCCAATGAACCTGTTAAAAAG  
ATGTT

>chr2\_35641096\_35641296  
AATTGCTTATGAGTTGTATGGAGTTCTATATTTTGTACATGCTAGCTCGTTGAGTTGCAGCTAA  
ATGTGCTGCCTGTGAGGCACTGTGCTGGCAGTGGTGGAGAAATAAATCATTGCTCAGTGGGAATG  
ATGAAGGTACCTGTGTACAAGGAATAAGATTCATCCCTTTTATGAATGCTTTATAAGTTGTAAA  
GTTCT

>chr4\_123617950\_123618150  
ggcaagaggcttatttagcttttaaaaagatttacatacatctcaatggggggcaaagaaagaatt  
cacaattacaagtgttcttaagtaataagaaagcagaaggatgattaccagaggctgagaagtata  
gtggggggaagggggttagttaatgagtattaaaaaaaaaatgaataagacctagtagtatttgataac  
acaac

>chr14\_55141050\_55141250  
TTTGCATGAGGTTCTCTAAAAAGTAAGACTGTAAAAGCAGCTTGTTCAAACTTGACCTCTTCG  
GCATGCCCAAGAATTTGTGAAACAAAAGAGAAGGCAATGGATAATTGATTCTGTCTCTAAAGGC  
CCTTCTGACACTGGTCAGGTACTGGTGTGGTTTTctactggtgtagaaactggtgtagatactggt  
gtaga

>chr11\_117009990\_117010190  
gctggaattacttgcgtgagccactgcgcccggGCGCCTCtttttttttgagggtgaagtttcgct  
cttcttgcttaggctggagagcaatggtggatctcggctcactgcaacttttgcctccaggttc  
aaacgattctcctgcctcaacctccgaagtagctgggattacaggcattgtgccaccacgcccagc  
taatg

>chr17\_48154001\_48154201  
ATGCGGGCAGCCTTCGTGTCAGAGCAGCAGCAGAAGCTGAGCAGGTGGCTGTGGGCCGCCGGCCG  
CGTTAATCGGCCAAGGGTGGGACGGGGCCTCATTAAGTGGCAGGGTGGGGGCGGGGCTCATGGC  
AAGGCGAGCCAGGGACAGGGCTTTAGCGGGAACAGGTGGGATGGTCAGAAACGGGGCTTTCTCC  
TCCAG

>chr5\_129061501\_129061701  
tcttggctgaggggaggggtccattcaattagttgggggacttagaattttattgttggtttaca  
TGGTGAAATTATCTCATGTGTACCCAAGTACAGAGAAGATTGTACTTTCCTTAGGTAGATTTAAT  
TGATGAATATCACTACGGCAATGGAACAAATTTTGCTTTCAGAGACCTTGGGGCTTATTTTTTGG  
TGGGG

>chr2\_47905696\_47905896  
CCCAGTCctgagaaaacaagaaattcaaatctaagctggttgaagaataaattattgtgagctt  
taaagaatgattaaaagcctgagtcctcatgacaggcagctataacctaggcagttgcaaacttta  
ttttctctgattatggattaagccttcttcttgcctacattgttttgtaaaatgctgtaaatgg  
ctgaa

>chr5\_78984844\_78985044  
TTTGAGCAGTGGGAAGCCATTGAGGGGTTTTAACCACAACCTTGATCCGGGGAAAGGTTTGGGGCA  
TTTGGGCCAGTTTCAGACAAAACCTTAGCTTTTTGCTAACGTGGGGGAAATTGCTCCTCCTCAAGG  
TTTAAGATGAGTGGAGATAAAGTTTCTGGCTCAATAACAGGGACCACTGAGCAAGAAAATACAC  
AGTAT

>chr14\_82863247\_82863447  
TAATCCCCAGACAGTTCCAAGTTTTTTGGTTCATTATCACATTTTCAATTTGGAGTCTCCTCCATA  
AGGCATTCACCCAACACTAGCTGCACAGTTTTTCTCAAAATATCTTTCACAAGAGGCTTCAGA  
GCTCTGATAACTTCACACAGGAGACAGTTGGGTGTTGCAGTTAAAACGGTGCCCATGGACTTCA

AGGGG

>chr1\_242375177\_242375377

gcttaaagctagtgaggcctatgtttggcaggctcaattaagggacctaatgcaaactgttgtat  
cccaaaacctatggttccctgaagaaggcatgctagacgtaaagctctggaacaagtggggagaa  
atcttaaacattgcatgcaagggcaaggtcccagtatcatctttaatgctatgggccttagttag  
ggcag

>chr1\_228107977\_228108177

AACTACACACATCTATCTCGATTTAGTGGTTTCAAACAATAAGCAGATCAGAGGCAGGGTTAGG  
AGGGAATATGTCAGGGACGGAAGGCGGGGCCCTCCCAGACTGGGGCTTGGCCGAGAGCGGGGAGC  
TGCAGCCGGGGAGGTGGCAGGGATGGAGaaaataataattattatattagttaaataatcataat  
aattt

>chr8\_5423192\_5423392

gcttttacgtatgttactctgagaacaccctcttttatttggattagcatagagttccataa  
tccatggggcctcctgtttgtgtggaagtggtagtgtgcctctgatttacaatcccctgtggg  
ttctgtagccctgttttctactgttgccttctttgccataagcctcccacgatcacctcccctt  
ccaag

>chr2\_188430755\_188430955

taagtgggggcagggcatattcacttcttttgtgattcttcagttacttcaggccatctgggct  
atatgtgcaggtcacaggggatgcatggcttggcttgggctcagaggcctgacaGAAAGCATAA  
AATGAGAACTATAGAAAAGTACATAGttagaaaataaaaataaaatttcaggactatctaaattt  
agtat

>chr2\_194212955\_194213155

CACAGAGGCTGCAGCTCATGGAGGGTGCAGTGGGCGGGCTTTTTGTAGTCTCCTTTTCTCTCATG  
GAGTCATTTAGAAGTTTTCTTAGTGCTGTTCTGATATTTAGGAAGAGAAAGATATAAAGATGCT  
TCCTAGGATGAAAATAAACTGAACAGGTTTTCTGTAGTCTCACCTGGACCTCTCCTGCAATCCAA  
AACCA

>chr3\_150820710\_150820910

TAAGTGTAAGTCAATTAAGTGGACTTCAGAGGACAGAAACCAAGGCTTATGTTTGTGTTCTCTGC  
CCTCAGATCACCTAGCACACTAGCTTGTAAAGTACTCTGTGAAAAATGATTTAAAGGAAAAATTT  
GTTATGTAAGATTGCAATGCAAGAACTATATGGCATAACCTCAGCAATAAGGGATCTAAAGAGAAA  
ACTAT

>chr4\_135545550\_135545750

ACTAATCTTCCTTCCAAAGGTTTACTGCTCAAGGCTACACTTAAGAACCTTCCTCCTCAAAGTGA  
GTTACCATTAAATTCCTGTGCAACTGTTTGGGAGATTGTTTGGTTGGAATTACAGTGGTATAAT  
GACTGCAGTGCTCATTGCCTCTGTGCATAACACTTGCAAGTTCTTTAGTCCTTATTAGCTCTCAA  
ACACT

>chr5\_6143200\_6143400

gtttccaacaagatcacattccgaggtgccagggattaagactgcagcatatgaatgggggttg  
aggaacacaattcagcctgtagcaGTAGGTATTCTTATTGCTATTTTTTGTATAAAGAAATCAA  
CAgtatcagccagggcccacttaggaaaacagaaatcacaccaattattataacggagagaattt  
agtat

>chr6\_136827507\_136827707

CAAACCACACTTGAAAGTCACCTGTAGGGAAGGGAAGAGAAATGTGGGGAGGGAAGGGCATTGGT  
AGGAGTTTTTAGAGGACACAATCCACAGTTTTAGATAATTCAGGATATTTTAAAGTTTATAAGCT

TTGGGAAATTTCTGAAACAATAAAAAGATTATTTATCAGGGGGCATCTGCTCTTCCAGCCTCAGT  
ACTGG

>chr6\_151423107\_151423307

AGTTTCCTAGAAAACACTGTGACAAGCAAAGCAATAACACACGTCGAGAAATATCTGATCAAGCGGG  
AAATCTTCTGACTGTCGGGGATCTCTAGTAAGATCTCTTGGAATGAAGTGCACTGTGTATCCAAA  
ACTATTTTCCAGCGCCAGTGAAGTTGCTCTTACCTAAAACAAATGGGTTTATGCTAGTTTCCACC  
AAGGA

>chr7\_29322475\_29322675

AAATAGGAATCGTGAaagaagcaacagagaaagatgaaaaagattggagaagaagaagaaaatga  
aaacagagaaaaggaacaaTATCAGCAGGTGGTGGATGGCCCGAGTGGTAGAGGAAGTGAAAGCC  
AAATAGCAAAAGTGGCAGCAAAGAGGACAGCTGGCCAGTAGGAGAGAAAAGAGAAGCCACCTCTC  
CTGGA

>chr9\_27354000\_27354200

TGGATGATCTGTACGTCTGTGTCTGTGTCTGTGTCAGTGTGCCAGGCTCCCCCTCCCTGCTGGAGACCAA  
GTGAAATGGCATGTGTTTGCCTGGGTTCCAGGCTGCCAGCCATAGCGGCTGAACAGCAGGTCCC  
AATGGGAGCCATGAGGCAAGCTCTGGGGGTGGATGGATGTGCTGGTCTTACCAGGCTAGCCAGG  
GTGAC

>chr10\_77298594\_77298794

AAACATCCCCAGGCAATGACCTTCTGCTAGCCTCATGTGATATTCACATTCTACAGTACTGAATG  
CCAAATTTTCTGTCTTGAATAGAGTGGTACAGGTTGCATGTTCAAGTTTAGAATCAGCAGGGTG  
CCATCCCTATATTAGTGTGCTTGCATGCAATTGAGTGAAAGCTTTTTAGAGGATTTCTTGGCAG  
AATGG

>chr11\_2024424\_2024624

CACGATCCCTGTTCCCTGCTGGAGGCCCTGTTGGGAGGGTCTCCCTCTGGACCTTGGGCTCAAGTT  
CTTTGGGGTCCAAGTCATGACCACTGCAGAACAGAGATTTCTCTTTGCCTCCAAGTATCCACTGT  
CCTACGTGCTATGGGAGCTGTCATCGGTGGTGTCCCTGGGATTAGGCTCCCAGCCATGCATGGGC  
TCCTA

>chr11\_68868624\_68868824

GTGAGATGAGGTGGAAGTGAGCAGAGGGGGCTCCTGGCAGGGCTGCGAGCCTCCTACCTCTGGGT  
CCCACATCGGTGCTGGGTCCCAATGCCACCTTGTCTCAGGGGTGACGTCATCACCTTTTGAAGA  
AGCCCAGATGGTGTGGAATAGCGATCGCCACCCCCAGTGTGCACCAGGGAAGGAGCATCGTAGA  
CCTAG

>chr14\_96448247\_96448447

GGCGAGGggggataaatggtccccacctcaaagaccatgaagggttaaaggaaatggtatattgtg  
agctccttagcagagtaacaggcacatcaaaagtgctcagaaaatCTGTACTCAAAACCCCAATA  
CCCACAGCCTGAGGAGccaattactctcctcttgttctctctaaaaccccccttcaatcaggctga  
cacct

>chr15\_74556147\_74556347

tgcaacagtggttatatgtgtgtctggatgaatctggatggtggtgtatgccttgagtgac  
aagtatgtatagatcgtgtgtgtggctctgtgtgtatgcatgcatgtatattatgtGGCTGGTGGG  
AAGTTAGAGGTTATGATGAGTGGACCTGAGCTGGGATCCTGCCCTGGGCTCTACATACTTGGGGT  
AACAG

>chr15\_90011796\_90011996

atccagaaacagccagtttagcaagatacctagttacttaagacaatttcagcaggctttacaa

aagtttgaactcaaaggccccaccataaccgggaactaaccagcaacccaaaatcaggctaaggg  
 ataaggtacttgttaaaacatagaaggagggatcacctgctcaacaattgcaaccccaatggaag  
 ggacc

>chr17\_3875851\_3876051

ATGTCAGTGGTGAAGGGGAAGTGGCGGGGGCAGCGTCTTCCCGCAGAGAGAACAGAAAACAGTGG  
 CGGGGTGCCCCTGCTGCTGCCCCACTTTGGTTTGTAAATGGTTTGTAGTCAAAATGCAAACAGCC  
 TTGCAGGCTTGGGAACCTCACCTTCCTCTTCTTCGGGGTCACCTGGGCCTGGTGGACAGGTGTCC  
 CAGGT

>chr17\_35118487\_35118687

tggatgtgtgagttaggtgtgtatagtgtgtgtgctgggtgtgtgacaaagtgtggatgtgtgaata  
 ggtgctgttagtgagtgtgtgggtgtgtggagtgtgagtgtggatgtgtgagttaggtgtgtatagt  
 agtgtgccagtgtgtgacggagtgtgagtatggatgtgtgAATAGATGTGTATAGCGAGTGAGTG  
 TATAT

>chr20\_50214993\_50215193

GCTCCCAGGTGACAGTGTCAATGGCGCTTTATGTAAGTTCTTTCAGATTGATGAACCAAGAAAA  
 AGGTCAACTGAATCCTTATGCTTAAGGTTTACAACTCAGGAGAGTTTCTTGTATAGTAACTCTA  
 GTTCTTGTGTTGCTTATTTCTTGTCTTCCCCACCACAACCTAAGATGACCTCCGAGAAGTACCCA  
 GGCGC

>chr20\_60140805\_60141005

CCTGGCAGAGGAGAAGCCTCCTTCCACGTAGGGAACAGCATCTGCCTGCAGAGGGCTGCTGCCAG  
 GAGCCAGCCGAGGCTACATGCCTGCCTGGACGCTGTCATGAGGTTGCTGCCGGGGTTGCTCAGCT  
 GCCTGGGGTGAGGGTGTCTGCATCCACCCCTCTGTCTCATGGGGTTCTCCAGCCCCATGTACA  
 CTGTT

>chr20\_61865355\_61865555

CCCCGGTGCCTGCGGGCAGACTGGGAACCAGGCAGCAAATCCACCCAGCTTGAGGCCACAGTCC  
 TCCTGAAAGGGCCCCAGGCCACACCCGGGGTTTTGTGTAAGTGACCAAAGGTAACCGCTGTGCT  
 gagggggcggtggaggacagggagggggcgaaggcgaggtgggcgctggaggacgtgggggtgaa  
 ggcga

>chr22\_46241536\_46241736

TAGAGGGGAAGGCTTCTCAGCTTGATACTGAGTCCAAGTATTTGCAGAGTGATTATTTTTTAATA  
 CCTTAACAATGGATGTGAAGATTTCAAAAATACTTATTTTTGCAATCTTAAAAcagtcggtctc  
 tgtatccacagattgaaccaactggggattgaaaatactcaggaaaaataaaatagtagtacaac  
 aaaa

>chrX\_8672400\_8672600

AGATTGTCTTCAGCTGCCCAACCTCCCCTTCCCAAGTGTAACCCTCCTGCCCTGCCCCACACCA  
 ACTCTCCTTCTTTCCTGCAATTCAATGCTCCCCATACCATTTGGCTTATACACACCCATCAAAATG  
 AGAAGAAAGCCAATAGCCACAGAGCCTATTTTGAATTGGGAATTAATATCAATACATTGCGTTGA  
 GCAAG

>chrX\_45763456\_45763656

ccatgacacaggcactgaggagcaggagtcaaccctgaaagctggcaccaggacgggtctgtcc  
 ttcaagggaaaagacatagcccctgtgggagaagccatccaaggcagggaggggtgtctagctt  
 tcccctccgaaccattccttccattggctgcaccaggcagctgacacaggagcttactcagaaa  
 actgg

>chr2\_181010755\_181010955



AGTCTTCTCTTACCTAGGATACAAGGATGTATATCCATGGTTTTTCTCACTGAATTCAAATTAAT  
TGCTGTGATATAAGTTTATATTTATGCCAAGATACACAAGGTTACTTTTTTATCCTGCTTAACT  
CTAGaaaataattaagattatctaagataaaaataattatataataaaaGCCGCTGCTATAAAAATA  
GATAC

>chr3\_23787796\_23787996

ATAAGACTCCAACGCTCAATAGCCCACCCAGCTaataataataataatgataataaAAAGTCTAT  
GTGGAAACCTGTGATAATCCAAATAACTAATTCTAGCCATTAATTTTCAGCCTTCTCCCTCACTGG  
GAGATTCGAGAGCTGCGAAACACCAAGAAATAAATCACTGAGCTTCGCTTCTCACAGTCTACCGT  
CTGGT

>chr3\_191640106\_191640306

atattgtcctccTGCCATTTTTGATTGCATTGCTTAATAAGGATTGAGTTTGGAGAGTCCTGTAT  
CTATTATGGGTAACGTCCCTTACCAGGTGTATGTTCTCTGAAAATGGTGGTTGTAAGCAttgacc  
tgctaggtggctaattaagggattggcttgggagcttgccctctgTTTTGCCACCTcagtgcttt  
ctcat

>chr5\_169691222\_169691422

ttcagacatactgaagacctgaagaccaattgccccaaattgcaattcTTTTccttaaataaaa  
acaaatttagagattttcttctacgtttttatTTTgactttgataTGGTCCATGTGGGCTGACAA  
TTGTTAGTTAACTCGCCTTTCTTTCCCTTCCCTTCCACACCCAGGCACAGTTAGTGCCCTATGGCG  
AATGG

>chr6\_18485421\_18485621

ctctcagggctaagatacatacctcattggaatgggcatagctgtggctcaccagatagtgaggag  
agtccctgaaataccttgatgaactttaggaaatctttcctctgaggtgctgagaaagccattg  
acagggacatgctgtgctttgcaattcattgcaatgttacctgagggTTTTgttggggaaggtatt  
ggcca

>chr6\_34109022\_34109222

GCTGTCCAGGCTCTCCTGGGACTCACCATCATCACCACCAATGGGCGACCAGTGCCTTCTCGGGA  
GAACTGAGAGCCTTAGCTAGACACCACGGCCTGCCTGTCAGCATGGCTCGGCCCAAATGGCGTG  
GGCTGGCATTATGGGCTGGCATTTCCTCAATTACCACAGATAATATCTACCTTAATTGAATGGGGT  
CCAGA

>chr6\_129517307\_129517507

TTGCCAAGAATACCTATAGTCTAGTTTAAGATGCACATTAGGAGAGTCTGCTGACATAATAGCAT  
CTGGCTTCTAAAAGTAATCTCTGGTAAACTCTTTTGTGTTTGTGTTCTTGCTTGACTTTCATTTC  
TACTTCACGGATCTCAAATTAAGCTATAGATTTGAAGAAGGAACTGATATTTGAGATTTGTAG  
GACAG

>chr8\_129476018\_129476218

GTTTCCAAACAGCTAGAAACATCCTTTTCCCTGAATAATATCCATGTTAGGCTTTCAGAGCTGAG  
TGAGTAATAAGATACTAGGGAGAGTCCCTGGATAACAGGTAAGTGGAGTTGGAACCACTTCCAGAG  
CAAAGGATAAATGCTCTTACTTGGCTCATAGGCCTGACATGACATGAACAAAAAACAGAGTTTT  
CTAAT

>chr9\_2213600\_2213800

AGTGGGCATATTTGCTTATAAGCTGTTAAGCAGGGTATTGGAAGGCCTCTATGGAACCTTCACTTA  
TCAGTGATATTTGCTTAACCTAACTACATGCCAGGTATGTAGTTCAGTGACACTTAAGGACAAA  
GGTGGAGTCACTCCCCAACTTAACATCAAACAACCTCTCTAAGAAGCAAGCCTGTGGACATAAG  
AAACC

>chr9\_102062179\_102062379

ATCTCCACATTATCAGCATGACTTCTCTGAGTCATGTTAGCCCCTGCATCCTCCCCTTCAGGCAG  
CAGGATGTCCTCACAAAACAGGGCCATTGACAACACAGGTGTGCAATTTCAATTCAGTACAATTT  
GATTCAAAAGATGTGCCCTTTATGCTGGCGCTGGACAGAGAAGGGGAGAAGAACTTCTTGGC  
TGGGC

>chr13\_20260800\_20261000

AAAATTCAAAAATATAGTTTATGTATAAATAGTATTTGAAGGCTGTTGATTTTTATTAGGTATTC  
TTTCTAAAGTGCAACAGTGTAATAAAGATTATTTCTAGATCTCAAGGAGGATCTGAATGATGGCT  
ATAATGAAGGGCCTATTTAGGTAACTTTTAAGTTTGAGGAATAAGAGAATGGGGTTAGTCCACTT  
AGGGT

>chr14\_48734050\_48734250

ttgagatctagaacagaataatgggttggtggagggaggtattgaggataggagagtatatgggtt  
cggcaccacggggtgtataggcaaaacaatntagttgataaggcacagatcctgaactaatctgt  
aagacttgtccagtttttggacaggtaaaatgggggaattgtaaggagagtttataggctttaa  
agacc

>chr14\_70758247\_70758447

ctcaacctagcagagccaaagagataacttgatgatgtaagtcagattatgtcattcttctgctc  
aaaactctccaataaatagctcaccattcccttcagagaaaagccaaaggacttaaaatggccaa  
caaagcctatgatctgcacccccctcctccctctacctcacttcactctttctccctgactcactt  
ggttt

>chr15\_60412708\_60412908

AGATTCTCTTCATAACCCACTTTTGAGCTAAGAAAGCCATTCATCCCaaataacaatagctggcct  
ttattgagtgattgccatgcaccaagctctgtgTGTGTCACTTACAAATACAGGCAGCCTTGCTC  
TCAAGTTCACACACTTAATACTACCCTAGAAAATTTCTCTAACATAAAATGCAAGTCAATCTGC  
AGAGC

>chr16\_710199\_710399

AAGCACAGAGGCCCCCCGAGGGCTCCCCAGCACCTCCTCAGGGTTGCTTTTGGTCGCCAAAGGT  
GATGGCTCTGGCCCTTGGGCGCCTGTCCCCTGGAGGCAACTTCATCCCACACCCCCACCCCTGCC  
CTCCGCTGGCCTCCAGACGGGACTCTGTGGTGGCCTCCTGCTGACCTGCCTTCCCCTCTACCCA  
GCAGC

>chr16\_3048399\_3048599

GACCCCTGGCTCTGCCCCACACCTCCTTCTGCCTCTCAGCCCTTCTAGCCTCTGCCCCAGTGTT  
GCCACACTCATCTCTGCTTTCCCTCTCCAGGACACGGCCATGAAAATGGGCCCTGGCCAGGTGAG  
GCCACTGGGACCAGGGGTGGGGGCCAGGAGGAAGGGAGAGGGAGGCTGCTGGAAGACGGAGGGG  
CCTCC

>chr16\_29923299\_29923499

AGCTGCTGCTCCTCCCGGGGAGATGTCACCATGGGGATGAGGCACAGCGGGGACAGCGTCTCCCT  
TTTTTGCTGGGGAAGAAGCGGAAGGTGGTTAACAGCACAACCAAgggccacgtactccccactt  
aaaagccttcaaaagctggttggaacaactccagactcctcagtggtccgcagggctctgcagg  
ctcca

>chr22\_42777256\_42777456

TGGCAAGGCCCTGCTCCCAGAAGCTGGTTTTCCAGGATGATTTTCTCAAGCAAGTGCTGACAGA  
GCAGGAGTCAAGCGGGGTGGGGTTGGAGGCTGAAACCCATTGAAGGGGTCAACTTCCTAGAGGC  
AGGCAGGGATGCCTGGGGGTGCCAGACGTGGCTGAGATGTTTCTGCAGAGGGGAGGTTGGGAAGA

CCTAG

>chrX\_62975075\_62975275

CCACTGACATACCCGCCGACCAATAACAGATGCCGCAGTAGCACGTTTCGCTGCCCAGGGGCGGGA  
CTTGCGCTGGCGTGCTAGCCGCGACCGCCAATCAGAGCCTCAAGGCTCCCAAGCAAGCTCGCTCT  
CCCCAGACCGCGAGAGTACCAGCCACCAGTTCTGGTTTGGGGTGGGGAGCTTCTTGGGGCG  
GATAG

>chr1\_3270340\_3270540

CTGCCCTGTGTCTTGTACACCAGGCCTTACCCTGGGGACCCCTGCTCCCAGCGGAGCCAGTAGTG  
ATGACAGGCGCAGCTGGGAGCAGCTTGGTAGACCTAGGGGTCTTTCTAGAAGCCAAGGGGGCCC  
TTGGCACACACATGTGGATGCAGGGCTGCCACCCAACACTGCTGAGCCCACACAGGCCCAAGAG  
AAAAG

>chr1\_12125613\_12125813

gcagacctttataaatgcatgtccatatttatattgttttaataagacatatatatagttttccat  
atactataccctacgtacatatggttcttcatttggctttataatgtctatgaggcatcttggg  
gagctttccatgctgaaacttacagatcctctgcctatcttttaaatgctatgtgatcttttgc  
caaat

>chr1\_114566077\_114566277

agtggaaagcccatttgcataataagattagagtgggggtggccagtgtcccctcctgctatgtaa  
acctcacacttgggtccaaccaatctgtgggcatatgtaaatcagacaccgtctcctcaagcctg  
tctataaaatccggtgcactccagtgcactctgctgcaggccggaagtcccatttgggcaccct  
tactc

>chr3\_191389306\_191389506

cacctttgaaacatgggtgaataatcagagaggtgtccctgcaatgattaaacaccaaggaagg  
ctgccttcccagtcctgaccggcgccggagtttgggtccacggataaaaacgtgtctcctttgt  
ctctcctagaaaatgaaaggaattgaaattaagagaacggagagattgaagagtggtgccaagat  
tgaaa

>chr5\_34545243\_34545443

Tgttactggcagcaaatccatacggatctgcggtaacctcaattcttgcctcctcagaagaaaga  
attcaccaagaagagaccaaggcaagttttagagcaggagtgaaagtttattaaaagctttaga  
gcaggaaggaaagtacacttgtaagcaggcaacttgagagatcaatgtgccatttgactttgac  
ttgga

>chr5\_143116607\_143116807

tgactgcagcgtccaccagaattcctggagggttggtaaaactgattactgggttccatcttca  
aagattctggtcagtagatctggggtgaggcctgagaatttgcatttctaagacactccccacga  
atgctaatagcagtttgagcatcacaGCACTAGAGTTAGCTGTTGGATCCTTTCTCTGGGGAGTT  
GGATG

>chr5\_176202194\_176202394

ctcgtggttctgtttgaggccgtcttcccaccaacaccacacagagctttttgagggtgagaat  
aaaccaagtcactctacgtctctccagGAACACGTGTTTATTAaatgaatgaatgaatgaatgaa  
tgaacgaaCAAACAGAAGCTGGGTGACGGTCGCTgtcatggagttagaaagaaagactcttgggt  
taggg

>chr5\_176369594\_176369794

aaattagctgggcatggtggcaggcacctgtagtcccagctactcgggagggtgaggcaggagaa  
tggtgtgaaccaggaggcggagctttcagtgagccaagatcgcaccactgcactccagcctggg

cgacagagcgagactccgtcttaaaaaaaaaaaaaaaaaaaaaGGTTGggccaggtgcagtggg  
tcaca

>chr6\_168733551\_168733751

taaagttaCGGGAGAGGATGTCAAAAATAACATGAAATAGAGGAAATCTGTGGCCACTCAATGCA  
AGGGGTAGAGCTCAGTAATGTGTGAGGTCCTAGCAATAGAAAATTAGCACCAAAATCTTGTTC  
TTGTGAGGACCCTAAGTGATTGAGAGGAAATTAATAACAGAAGGAATAATTTCTTTACATGTGA  
ATTAT

>chr7\_137888860\_137889060

gtaacaaaattgcacttgtaccttataaattttttacaagcaaaaaataaaataaaataaaatata  
aaataaaacaaaataaatgaatgtgatgatggcacctgagtcacgtgaaagacagctgtaaccta  
ggcagccgtaaactttgtttctctgtttatagattagccttttaccttgcctatattgttttgta  
aatg

>chr9\_45734404\_45734604

cccctttaagaacgCCACCGCTGAGAACTGACCCTCACATCTCCCTTCCTGAATTTCTTTAGGG  
AAAGCAACAACCATCCCTGTAAGCCATGGGTTTTTCATGCGGAGGAAGGAGAGGGCTAGTTGTCTG  
AGAGGGAAACTGCTTAAGGCTGCAGACTAGGAAATGGGATTCAGGTTTAAGATAGCTCCTTTCT  
GGACC

>chr9\_128191379\_128191579

CCACACGGCCTCCTCCGAGAACAGACGCCTCTGCCAGGCCATGTGGAGCGCAGGTGTGCGGGGCC  
GGCCGCTCTTGGATTAAAGTcacacacacacacacacacacacacgcccaggtgcatacactta  
aactcacgtgcatgtacacacatgcagaaactcacaacacatacactcacacatggttacatgca  
cacac

>chr10\_104951210\_104951410

CCCCATAAAACAGGAGAAATAGCCTAGAGAAAGATTAATGAGCACCTCTGTGCCTAACATTCTAT  
TGTAATCTGGCTTTCTTTAGGAAGATGTGATGTCTTCTGGTTAAGGGTGGCAGGTAATAAGGG  
AATACTATCTATATAAATCTTCTTACAATTACAACTTCTGAAACTTGTAGCTGATGGTAAATT  
TTCAT

>chr11\_94391152\_94391352

TCAGTGAGTCTACTTTTAGCTAGTTTTGATCCTTGTTCAAAAACAGATACATATTTTAGGTTGTT  
GCTATTTGTTTATACTTGAATGGGGATAAATTCTATGTGCTTTATCAAGAGCTTTAGATATTTAA  
AGAGCAAGACAGTCTGAGTGCCAGCGAGAAAGCCTGGTTATGTTTCAGCTCCTCGGTCTCTCGCT  
CTGGT

>chr11\_126906790\_126906990

CATATTTTCACTGACTTGCTCTATGCTAAACAGCTTTTTCTAGTACAATTTGAGCCATGAGTGG  
AGGTTTCAAGCAAGTCAGTGAAGAGTTTTTGAAACAGGCTGGAGTGCTTCAGTCCTTTCTTTTCA  
TTTTACTTCTGGTGTAATAGAGCTCTTCAAGAGTTTCATTTACAGGGGATGCTGAGTATTAGGAGA  
GGGCT

>chr12\_77018069\_77018269

ctcctgaaatccaagttcccagatgccagccaagggccggcctttgtaagcaggcctttccaagga  
taagcagttagggtgctacctcaactttttgttgacaGACCTGCACAGGGTTTGTCTGTGCAG  
GTTTCTTTGTTTTGTTTTATTTGTAttttacttagttgccatTTTTTaaatattaagatatttca  
ctcag

>chr12\_79268269\_79268469

TCAATAAGATAGTTCCCCAGGAATGAAAATGCAATAATGTTTGCAAATTGTCTGGTGCCCTGTTA

CTATATGGTAGATTTGACCACCTTTGCTCCTCTTTCTCTTTTTTTATTTtcagaaattctttcac  
ttgtaaaaaatgccacctgactcaaaatgcttaagcaagaaaaggattttgggtgctcatgtgacc  
ataaa

>chr13\_73109199\_73109399

CGGATGGTGCCTCCAGGACTCACAGCTTCCCTTCCCTCTGGCCCTTCTTTATGCCCTGGTGTTTT  
TCAGATTCAGTATCTCTATTA AAACTTCCCTACTCCTCTTTCCCTGGCCTTGTCTCCCTCTCTAAC  
CCCTACAAAGGACTGAAACTGGCTGTCAGCTCTGGGGCTTGCCACAGTCATAGCAGCCTTTGTTA  
ACAAG

>chr14\_69096047\_69096247

CTCCAGGGGGTTTGAAAATAAGAACCCCAAAACCCACCTCTCTTTCCATTTTCTTCTTTAAAG  
GTAGAGAAAGCACTGCATTTTACATTGGGTCTTGGAACCCAAAGCTAGACACAAAATGTGGGCG  
TTAGCAGCTCTGAAAAGTGTGTGCTTGGTCTTAACGTTTATTCTTAAAAGGAGGTGTTCATAACC  
CCAGC

>chr16\_1299199\_1299399

CTCTTCTCCCCGACCTCTGACCCTTGCCCTGACCTGCATGAGCCCTCCAGCTCCCTCCTC  
CCAGAGGGGTGGAGGGCGATGGCCACAGCCTAGGCCTGGAGGCAGACCCCGCTCCAGGCCTGCAC  
AGCCCCGGCTCGCACCCcagtgagcctcttctccccgtgggaaactgagggcagagagggcgcc  
gtgac

>chr16\_8981099\_8981299

tattgaccattattgccccaacctacagatgcggaagctgaggcTGAGTAACTAGATCAGCGCT  
GGAGACATAGGTCTGTCTCAGGGTTCAGCATCAGGGAGGAAGGCACAGAGGTGAGGGGTGCATG  
TGTGTGTGGCTGAAGCCTGGAAGGAAGGgtgtgtgtttatgtgtgtacgcgcatgtgtgtggct  
gaagg

>chr17\_35200087\_35200287

ATTTGGCATCTGGTTCAAGTTTGGTTTATTTAGAGCCAGGTCGGCGGGCTTTTACATATTAAG  
GTGCATTTTAAAAGAGCATTTTCTATTCTAATTTGGGGGAGCCAAGCTCTTTAGGGCTTTCCGGGA  
GCGGTGTCCACCTGATTTACATTTCCCCCATTGGAGCCGAGCCACAGACGCACATTAGAATGTAA  
ATAAT

>chr18\_33072202\_33072402

aaaacagcaaaaattcaaaatgcaacctcaatatccaataataaagtcaattaaatagagtagt  
taattccttggaatataatgcagtcfaatagtcataaaagactatgtgacttttaaaagtctaatt  
gagaagactatcaacacatagaaatgttcacaaaataatgctaagtgaaaaacggggcacgtaat  
actat

>chr20\_60091005\_60091205

TCCCTCACCCCTCCTGCCTGGTTTCCCTGGCTGCTCCAGGGTAGAATGCAGAACTTCTCCAGCCCC  
ATCTTCCCCTGGGCTCTGGAACGCCCCCAATACGATTCCACCGCAGGCAGGCAGCTCCCTCAC  
CACAGGGGCTCGCCTCGTGTCTGCGTTGCACTGGCAGAGGGGCAGCACAGGACTTAATTCTGCA  
GCCAG

>chr21\_31232529\_31232729

AGGCTATCTACTCTAAGCCTTTTGGACTGCTGGAAACCTCCTAGCTGCAGCTTGTGAGCCCTGGGC  
AGAGTTACAGCCTGCTGCTGTACTGCCAACCTGGGGGAGTGACAGCATAATTGGATGCCCTCTCT  
GTCTTTTGGCTCAAGACAAGGGCAAGGAAGAATGCCACCTGCAGGGAGGAAGTAGAGTCCAGAA  
GACAG

>chr22\_30281000\_30281200

GACCAGCACAGTGGTACAGCCCCGCTTGTCTGTTAATGACCAGCCATAAAAAACCCTGAGTTTCTC  
AGCTCATAGGCCAGGTTCTTcagtgggtgtctagtttaaggctggtcattagaaatattatggac  
tacctaaattcctcgaactcatgcaggacctggtgaattaaaatctctgaggatagagcctggg  
atctg

>chrX\_92084144\_92084344

cccactcctgcccgccagagaacaaaccccccttgactgtaatcttctttacctacccaaatcc  
tataaaatggccccaccggtatctcccttgctgactctcttttcggactcagcccacctgcacc  
caggtgaaataaacagccatggtgctcacacaaagcctggttggtggtctcttcacacggacgcg  
catga

>chr1\_164562176\_164562376

CACACAATCCTTAGAAttttttttttttttttaatttgagacagagtcttgctctgtagcccaggc  
tggagtgcagtgccgtgatcttggtcactgcaacctctgtctcctgggttcaaggattctcat  
gcctcagcctcccaagtaactggcattacaggtggtggtccaccacaccagctaatttttgtatt  
ttaa

>chr2\_114430330\_114430530

tcacatgaatattgatatccgaaactccctaggectaagcatccatttgcccagtcaagaatttc  
aattctcacagttttctcctctgctccacatattcctgggaatcaccaggatgtgtcttacatg  
tgccaacagtgagcctgggctgcctctCACCTGAGTCTGTGTTGCTGTGGAGGCACCACTCTGC  
AGCCT

>chr2\_131268730\_131268930

CTCTCCAGCTGCATCCCATTTCTCTGTTCCCCTGTAGAGCAAAATGGCTCCAAAGCGTGGTCTCG  
TCTTACCTTGAACACCCCTCCTCCCTCTCGCTATGTGAGCTACTCCAGTTCAGCTCTCCACCTCT  
GCACTACCCTGAACCTGCTCCTGCCGGCAGCAATGGCCTATGGAGAAGTGCAGCCCCCAGCTGTA  
AGACA

>chr3\_19034596\_19034796

AATAAGGCTATAATTGTTTCAAAAGGTTGACACACACTTAAACTAGGTATCTTGGATTTCTTTGA  
GTTTAAAGCCCTAGTAGAACAGACAACCTGAATGTTTTTAAGTATGTGGTGCATTTGCTGTTTTTC  
TTTCATTATTGTTAGGGTTTGTATGGCAATGTTATTGTcagtatggccaacagaactctctacaa  
tgatg

>chr4\_92488377\_92488577

tgcactatgatctgagagtatggttggtgtgattacatttcttttacatttggtgaggattggtt  
tatggtcaattatgtggttgattttaaagtatgtgccatgtggtgatgagaagaatgtatatttt  
gttggtttaaggtggagagttatgtaaaggtctatccaatccatttggtccaatggtgaattcag  
gtctt

>chr4\_159182550\_159182750

AGGGATTTTTTTTGCAAACACCAAAGACTCTACATGCTGTACTATTTTATGTAAATATGTACCTT  
TTCTATGGCTATTGCAAAAATTCTAAATACCTAATCATTGCTTATCTTCGATGCTTTGTAAGACT  
GATTTACCTCCTGAAAAGATGATTCAAGATCATAAATAAAAAGGAAGAAAATGTCATTTTCCTTAA  
CCTTT

>chr5\_89600644\_89600844

CCTTATTTGTAGATAATATTAATGGTGATAAGAATAGCCAGGCTTACAAGAATCATTTCCAAACT  
GCACTCAAACCTGAACTCCAAGTCTGCAAAAGCAATATTGTACCTTCCCCACCCCCACAGAAAAT  
AACAAATAGATCACAACCAAAGATACCAGCAGGTGTGCAACATGCAAATGGCAAGCATGAAAACCTG  
AAGTG

>chr6\_144965507\_144965707

AATACCAGGGTATTCCAAATGAATGATTTTTATCTGACTCATTAAGAAGTGAAAATAAATATTTT  
ATTATACATGTAATATGATTTAGTTTTACAACTGTAAATATCATAATAATCTCAAGAAGTTCTA  
AAAATGGAGATAATTATGACAGCCATAAAATATAAAGTATATGGAATTATATATTTGGCTATATA  
TTAGT

>chr7\_27473475\_27473675

GGATTAAAAGGAATGCCATTCAGTTGAGGCAGCATCTTAAGACCTGGGGACGTCTGTCCCATGT  
AAAACCTTCTGGTGAATGATTTAACTATCTCTACTAGGCCAACATCCTTTTAAAGCTAAGAAAACC  
ACATTCTAATCTAGACATTTGATATAAAAATTAGATTTTCATGAAATAGCATAAACGTATTGTCGT  
TAGCT

>chr7\_143583067\_143583267

CGGCTTCTCTACAAATATGATTTCTCCCTGTGGAGAACTTTGTTGCTAGTTCTGATCCATGTTAT  
TTGAGTGGAACACGAGACTTGACCATGGAGCAGGAACTGGCTTTATGCCTGACCAGGTCCTGCAC  
TCGCATCTACTCATCTAACCTGGAGAGCTCAACTGTAAAACCTGGAGGAACCACTCATCTCTTTT  
TATGG

>chr10\_60775594\_60775794

agctcacttaacttaaaagttcaaggtggtattatccttaggcaagcaggatccaggagtttgaa  
taattccattgcagatgctgtgttctctattgctagtctctgctttatcctccattagccccgtt  
tttttcaggttttcctttgtcatgacaaaatgtttgtcaatagatctaaattagtcttagacatt  
ccaat

>chr11\_132202190\_132202390

CAGGTTCCGGGGTGGTGAGCGCATGTACCTGTGGGGTGGGCTGCGCAGACTGGATATGGTCACA  
TAGTGCCAGCCACTCACCAGCCTGAGATGGAGATGATGATGATGGAGAGCTTCAGAGGGGGCTGCT  
CAGGCTTTTCCCAGATATACTACAAGCAAGAGAATGGCTGGCAGGCACTTGGTGGCCTTTTTCTG  
TCTTC

>chr13\_54707199\_54707399

aatgtcatcagttaaggcaggaactggccatctggatgtgtacgtgcaggtcacaggggatatga  
tggcttagcttgggctcagaggcctgacaGTTTTCCCTTAGGGCTTCTGTCAGGCCAGCATTTTA  
ATATGCTTGACATTTTTGACTTTCCAGTAAATGTTTAAAAGAAATTGTAACTAAATTTAGCTGA  
TGAAT

>chr14\_103813847\_103814047

gcacaaaggccgtcacaccttccacaaataacttctacaaggacatctaccagcaactgcc  
tgtccaaccttgaccggcgctcggccttgattgacctcatggccaaggctgattatctcaa  
acaattatgtaatcctcctcacttttctttaaagctattctctccctttaccttcctaaagta  
cacac

>chr15\_84145796\_84145996

AGTCACCTCTGCTAATGCCTTACTTGGCCATCACACACCAAACCTTCTATCCAGATATTATAGT  
ACTGGGGAAGAATGACTGTGGTATGTTTGCTTGGATGGGGACTCTCATTTACTTGGAGGGAGGAA  
CTCAAGAAGCATTTTTGGGTTGCAGGTTGTCTGGCATTTTGCTGTGCATTTTCATTGTAATTTCTC  
ACCAG

>chr16\_76920099\_76920299

aagtactcacagataaaagggtgccatagctgcaacttgctctataaatggccaaatgactcggg  
aaataaagcatgtgtgtgtgtgaagagagagatTGAAAGAGAAAGGAAGGGGAACAGGGGAGAGAG  
AGAATAAGGCAGATGGAACCTACTACTAAAATAGGCTCTATACATATGTATATATAGTGGTGTCTG

GAACA

>chr17\_27923074\_27923274

CCC GCCACAGAAACAGCTCGGCTTTCCTCAAGCACTCAGGAGCCAGGTTTCCCTGGTCTTGGCTT  
GGCATAGCTGCCTCTTCTTCACTCCAAGAAAGCCCCGCAGAGGCCCTCCGTGGGCAGGCTTGGCA  
GTGCAGCTGGCTGAGGAGGGGGCCAGCATGGCCACCTTCAGAGCAGGTTAATGGGCTTTGCTCAG  
CCCCA

>chr20\_32262139\_32262339

GCAGCCCCGCGCACGCCATGGCGCCGCCACCCGCTCGGGCTCGGCTGCGGTTGCTGCCGACCCTG  
GACGCCGCGGCGGACTCGGTGTGGCTAGAGGCCGCCCTTggcgccggcgccgacgcgcgggctc  
aggccccgccccgccccgccccgcgagcgccgggTTCCTCGCTCAAGGTCCAACCTCCAGCG  
CCGCG

>chr21\_35231530\_35231730

ATCAGCAGTTCCTCAGGATCACTCCGGGAAGCTGGCCCTAGGCTGGTCGTATTTCTTCCAACCTT  
TAGTTTgcagaggcagctccagggccaggagtcaagagacctggggttgattctgacttactca  
ctgcctttcctttttgagccttagtttccccatctgtaaaatgaaagggttgattcgatcatca  
caaag

>chrX\_89032944\_89033144

CAGACCAAAAAGGGGAAGCTACCTATATTACTGAGacaaatatcatgtatgtttttatatgtgct  
ctgaagaggatccttattgcctgtcactgcttgactgaggctgctgaaaatcaaatacaaaacct  
catcctttgagtggtgaattacaatacagggtgaactcaaagcctcacagcatgtctactgtta  
aagta

>chrX\_115947772\_115947972

taaagtcccttctgttatcagactgtattgaggtgggaaggctaaactgaggaattatgtctgac  
agaaggaagaaatgactgcggtggccttctcagaacctgtaggaaaggcctctacctatccagt  
gaaagtatctacctagactaagaggtattttagttatctgactcagggcatggtgagtaaagcta  
atgtg

>chr1\_57822612\_57822812

ctttaagagacttactttaatccctttgtgcttcaactatacattggaaacaataatgaccctat  
cctatagggtcactgcatggattaactaagttcatcctgtgaagtcattagaacagtgctggca  
cacagtacatgttcaacacatgttatattttatcaccaatacactctagcacataatagggtgcc  
aaaca

>chr2\_150172354\_150172554

TTCTGAAAACCCTGTGAAATggactggttcgaacgggcagtttataacatgatacttttagattg  
gaaggccagtgaggtgaggatcctgaagtactcactccctgagaagttattctcaaaatgaaaa  
cagtttaaataagggtggacaggaacaggtatttatgaagcaaagagttaggctaatttttgcttgg  
tctca

>chr2\_207096955\_207097155

gataaatgtttgagatgatggatagctaattatcccgatctaatacactctacatatgtattgca  
acatcactatgtacccataaataatacaattattttgtcaattaacaaaaTAAAATTTAGT  
TTACAAAAACACAGAAAAACAAAATCCTTCAtggcttctctctttttcctgtctctcactttac  
ccacc

>chr2\_236666061\_236666261

AGCCTTGTGGCTTATTAGGGCTTCCTCTGTTACACGCTGTGTACATCGTCCTGGTGGATGGGTG  
TTTATCTGGTAGAGTAGTTTCCTGGTCTAGGCAGATCCATGTCAGTCCTTTGACCTCATTGCCCCCT



GGCTTTTTATGTTTGTGCTGCAGTTAACATTCTGGAAAGCACTTTTATAGAAGCCATTCCATTTG  
TCTTT

>chr2\_236757061\_236757261

AACACTGGGAGCTATTTCAGCTGCCTGTACCATATCAGAACATGCTTAAGAAAAAGAGGGAAATAA  
TTATTGTCTCAACAAAGATTTGGGTTTAGCAAAAAGCTGGAAATAATTCACAGTGAAACTAATAAT  
CCATTGATTGTGATGTCCATGGTGAGATCATTACTCTCGAGAATAATACTGGTAATTTAGTTTGC  
TCGGA

>chr3\_115833910\_115834110

TTAAAATGGAATTTTTAGTCTAGCTCAGGTTTTATGAAATTATAAAATGAAAAGCTAAATATGGCT  
TACATTTGGGGAATTTATTTTTTCTTGAATAAGCCAATACATTTGCATTACTTTCAATGCAGAA  
TGAAGACAGCAAAGCTGAAAGGGGCTTTAATAATAAAGGGTAAAGGccagaatgttgtagcgctc  
tattt

>chr3\_195537003\_195537203

TGGGGAGGTGTAGGGAGGTGGTGGCAGTTTCCTTTGCCCTCAGCCTAGTCCTGAAACATCCCGAG  
GTGGAAGGGTCCGCTTACCAGCATGGCTTCTCTTGCAGCCTTTAAACGGCACTCGCCTTCTGAC  
TCACTCCCAGGAAGCTCCTCAAATATGCGCCCAAGAAATATTTCCCTCGGCGACTGTTCTTAGC  
CTGCT

>chr4\_91654377\_91654577

taacaaggatgagatgatatactctttgtagttttgatttgcatttctctgatgattagtgatggt  
gagcaccttttgatataatgtgttccatttgtatataattctttagataaatgtctattcagatg  
ttttggccattttaaatgcatgttaatttttgtcctatagagttgtttgagctccttatat  
attct

>chr4\_183004606\_183004806

AGAAATGTGTTATTGATCACCTAATTTTTTATTTTTTTTTCAGTCTTGCATTTGCTTTTTCAACTG  
TAGAAGTGCAAGAAGTGGTAAATGTGCCGATTTTAGACGTTAAAGGCATTGTTAACAGATTTGA  
CACAAAAGATAATGTTATGAGATGCAAACGACAGAAATTTACATGTCAAATCACATACTTAATAT  
TTATT

>chr5\_72779844\_72780044

ttctgccagctggtgaatataatctattcttattacacatttggaaactggggaaatgatcacagg  
agggtttaacaatccactgtgagatgaacctgagttaaaactccattgagccaggcgctcgtggct  
cacgcctttaacccagcactttgggaggctgagggcagcagatcacctgaggtcaggagttcga  
ggcca

>chr6\_11993414\_11993614

aactaaaaagaggggagttgagcttacacactaaatgcaaaaacccttcatatttcttaaccttt  
tctaggctggaataaccgtttgctaagtacacacactcttgtagtgatgcatacacacgcatacacag  
acacatatgccctaggcagacaactagaagtcttctccagggcatttgacaagcgcaatagaaaa  
gatct

>chr7\_13789275\_13789475

ttgtttggtggtggtggtggtggtggtggttttagttctgGAAAATACCTTTAGAAATGTATACAT  
ATGCCAGACACCTAGGACTTCTGGAACCTGGCAAACACCTTTTTTTTAggaacaatgccatcata  
acagatgggtggttagtgtaggcagcaggaatcaaaaatgtacatcacggttccactacaagggg  
gcaga

>chr7\_127657564\_127657764

GGACAAGTCAGGAAAAGATTGCCTAGCTGACTCTTCCCTGGTCTCAGTTCCGAATGAAAAGCCTG

CCATGCGGCCTTCAGCATCTGCTACTCCCCGTGCCACACCTGATCCCATCTCAAGTCATTTACACA  
CCAGCAGAGGGAAGCCCTGTTCCAACCTCCAGCAGCAGCACCCTCGGGGAGGGGGGGCAAACCTCT  
TTACC

>chr9\_8750600\_8750800

ggcatgtaagcctgaacctgaatgacaagaagaaatgcagaaaagcttcccatgtgaaggcacag  
actgccagggcagaggctgggatgcaggaatgagcttggttggtggctggagcccagagattccc  
agcagagaatgataccaggcagactgggaaaataaagtgggcccaggttgacagggcctgtaag  
caaca

>chr9\_80639980\_80640180

ATGGACATTTATTTTTGTTTTAAAGCCCAAATTCATGACCACCTAGGATGTGTTAACTCATTTTC  
ATCAGTATGCCTAGGTCCTTTTACTACATGTTAGATGAGAAATCAGACAGATTTTTACATATCGG  
TAATGTAACAAATCAAAGGTGATTGTTGAACAACCTCCTATAATTTTTATTTTTTACATATCGGTA  
ATGTA

>chr9\_87771380\_87771580

TTATCCCTTTAAAGCAGGGTGGGTGACTGGACATGGGAAGCAGCAGAGATCTGACCAGTACACCT  
GCCTTCTCACTTGGATTCCCTAAGCCCACCTGAGTTGTCATCCAGTCCCCTGTTAGAACCTTGT  
AGCCGCAGCTGTGTTCTATAACTACAGCAATGTCTGAGGATACTTCGCTTTATGTGCATAAAGGA  
GAGAG

>chr14\_33634249\_33634449

AGTTTAGCAGAGTGTAAAGTCAGGTTTGGGGCAGAAGGAAAAATCAGTCAGGATAAAATGGGTCAGC  
ATTCATcatttgttcaacaaataacttattgtactaggtgccaggcattggactcggcctgtcgga  
aagcactgggtgaTTTTATTTTTGTTGGGTTGACTCCCTGGTGGGATTATTCACAAACAACCTTTC  
GATGT

>chr15\_70923546\_70923746

TGGAAAGAGGTTTTCGCGCCAGTATTTATCCAGGGTAGGTATTTCTAGTTAGCTccttagcaactcc  
ggggaaaggggcatttttctctgccaatatttgcattgattcagaaaagaactccaactggcc  
ttgcttgatggtcacacccttaactagtcctctggtggccaggacagggcatcctGTTTGGAGT  
GAGTG

>chr22\_32607800\_32608000

GCTGAAACTCCTGGAGTCAGGGCTAGGTTAATGGGAAGGTTCCAGGACACTGCACTCTAGGGTA  
ACCAGCTTCTCCCTGGAGGGAGAGGGTACTGTCTGCATCACCCCATGGTATCACCAAGCAATCAG  
TGTTGAGTCAACTCCCCAGGGAGACCAGGTATCCCTGTCCATGAAAATTCCTCCTAGTGGCATA  
AATGC

>chr5\_118739101\_118739301

ctgtaatgtagtacaatatcaaaaccaggaattgacactggtatggtggtgctagactacagact  
tCCTTAGTTTTCACTgttgtataaatggaaccatacagttgtaatcttttcagattggctttttt  
ttactaagcataatacccttgagacatagccaggttggtgcatgtatcagtaattgattcctttt  
tattg

>chr2\_188423155\_188423355

gtggtgaaagtgtggggcagtgaaaatttttggggggtgatatggcgagagaatgggtgatggtt  
atcagggtgcttcaagcgggattagggcgggcgtgggaacctagagtgaggagagattaagctga  
agggaggtccttggtggaaggggtgatattgtggggatggttagaagaacatttgcgtatagaat  
gattg

>chr16\_70694299\_70694499

GGACCTGGGGACCTGAAGGTGGATGGGGACACAGCTCCTGGCTTCTCCTGGTGCTGCCCTCACTG  
TCCCCCGCCTAAAGGGGGTACTGAGCCTCCTGTGGCCCGCAGCAGTGAGGGCACAGCTGTGGGT  
TGCAGGGGAGACAGCCAGCACGGCGTGGCCATTCTATGACCCCCCAGCCTGGCAGACTGGGGAGC  
TGGGG

>chr5\_162236222\_162236422

CAGAAAATGACAGACAATCCCCTGACAAAATACATCAGCCTCAATTTCTAAAAATTATATGGTGA  
TCAAATAAAACATTTCTGTGACCTAGATCTAACTCAGAGTCAAGAAGATAAAAATCCTGACCTAAT  
GTTACGCCATTTTATTTTATTTTATAGATAGCAAACCAATACCATCTtgttgggggaagtcaggg  
acccc

>chr4\_152474350\_152474550

ATCAATGATTAATGACCTGCATTTTTATTTATAATATCACATGGTTTTATATTTCATAAACAATT  
ACAAGAAAAGTACATATAATTAATCTTAATTTGCTAATTTAAATTGTATAAAAACAGGGAATAT  
ATACAATAAATTTGTGGGTATTCCTTGTATTATTGATCAGTATCTGCCATATGAAAGGGAAGAA  
ACAAA

>chr18\_34768602\_34768802

TCCAGAACTGTCTCCTTCAGTAAGTTTATGCCTCACCACAGTCCTCACCACAGGTTCCCTAATT  
CTTTTGTCTTTTTTCTTTGGATAGAAATATTTTTGTGAACAGCAAATGTTTCTACTGCTGTATC  
AATGTTAGGTCACATGGCATTGACTTTTTATTCAAACCTGGAAGATTTTCATAGCAGGATTATAACAT  
TATAT

>chr19\_17958000\_17958200

ccagccCCAGTCGAGTTTTAAAATAAGGCTTCAGTGgcagtggecgccccactgcaatcccagctac  
tcagggggctgaggcagcaggatagcttgaggccaggggtagagacctgcctgaacaacatagc  
aagactcccatctccaaaacaacaaaaaaaaTCTTAACAGAATATTATTATTCTGTAATACTGTAA  
CAAAA

>chr7\_155017267\_155017467

TGTGAGTGACTACGGAAGACAAGGTGGACTCCAAACCCGACGCTATGATCCACTCGAGCCTCGTC  
CAGGGAATTTATGGAGCACGTGGGACCTCCCTGCCATCCAGAAGCACAGAGGAGGTGCGTCCCCA  
CAACAATGCCAGGAACACACAGCGGGGAATTCTCTGACATCGAGAGGCTTCCAGTGAGGGGCACT  
GGCTG

>chr2\_9533749\_9533949

CCTCCCGCAGAAGAAGCCTGCGCCGGGGTAAGCCACCCCCAGCCAGCTCGGCCATCCGTGCTCCT  
GCCCTCTGACCTCACCTGCCAGGGCTCTGCAGGAATGTTTGCAATCCCAGGGCTCCTACTCCA  
GCGTGGGCGCCACATAACTAATTCATCGGGGCTGAAGGGTCTTAAAAATAACTGGAGGATTTTTTA  
GACTG

>chr4\_105613351\_105613551

ctgctcgggggtcaggggtcagggacccacttgaggaggcagctctgcgggttctcagacctccag  
ctgcgtgctgggagaaccactgctctcttcaaagctgtcagacaggacatttaagtctgcagag  
gttactgctgtctttttgtttgtctgtgcctgccccagaggtggagcctacagaggcaggcag  
gcctc

>chr1\_10879813\_10880013

GGCTGCTCTCGGGCTGGTCAGGGCCCAGTTAGGACCCAGAGTCAAGCTCCTTCCAGGGGGCACT  
GGGAGGGGCGGGATAGAGGGACTCGTGGGTGAGCTGCCAGGCGTGGGCCAGGCTGGCCAGCGGA  
AGGAGAGGTACAGACCTCCCACGCCGAGGGTGCCACACAGGCCCAACTCTGGTCTCGGCAGC  
CAGCC

>chr16\_12322699\_12322899

ggcgagtcaagagccagagggactTCATTGCAAAGCTGGTGATGCGGGCAGGCTgcctccctgc  
agtgaccacacgagggagcctccaccgagtcttctgactcctgctgctctccctaagtgagtgtc  
tagaatgcgcttttctccccactcccaaatgccttgagggcttgcttgccctcattccttcac  
acaga

>chr13\_89894999\_89895199

ccttgatgatttctagggcctgtctttactttaatcccctaatacctgtcatctcgtaagcctagga  
ggatgtatgtcacctcaggaccctgtgatgattgctgtaactgcacaaactgtagagcatgtgtg  
tttgaacaatatgaaatctgggcaccttgaaaaagaacaggataacagcaatgtttaggaaca  
agaga

>chr14\_63863647\_63863847

caataaaagtaataatatgaataatagctaatacacatatggcacttactgtgatcatcaggcaa  
ttttccaagcaatctacatattaatcctcccataagagatagttttgtcccccttttacagaagag  
gaaactggggcacataggggtaagtaacgtgcccacggctctcacagctaataaggtggtaaagcta  
gaatt

>chr9\_124710179\_124710379

ATAGCTACAAAGCCTGGTTATGCTGGTGCCGTGCTTTTGGAGGATGGAAGGAGATTGTAAATTGA  
AAAGGAATAaagaaaactaccatttactgactgtctactctgcaactaggcactgagctagacac  
tctCAGACCTGGCACTAGaattgacacttactgaataactattacatgtcaagccctattccagg  
ccctt

>chr6\_56658041\_56658241

tcttagagttgaaaatgggtattatgattatgtaaagaggatgtccttattctgacaacacaaata  
cttaattatthagagacaaaaatgtcatgatgtctaaacttaaattttaatgggttcagtaaaaa  
aactgagaaagcacaattcagcaaaatgttaacactcagtgaactaaggtgacaggtatacata  
gggtt

>chr9\_139642979\_139643179

CTCCAGGCCCTGGAGACCCGTTTATATGGCTCTGAATTTCTCCGTGTGGGTGGCACTAACTGCCA  
GGAACCCCTCTGGCCTCTCTGCAAAATTACCCAGGGGAGCACTGAGCAGTGGCAGCCTCTGAGCCC  
AGATCAGACCAGCTGCACAGCCAGGAGAGGGTCTGGAGTGTGTGGATCAACCATACTATACTGAT  
CCCCT

>chr17\_41440874\_41441074

cagcaggcagcaccggcccgcctcccgagccctccatcctgcgctttcccaaaccatcaaaa  
caccaaccagtcctcctccctctcaagcattttccaacctgctgggagccactctgatctccc  
agaacacctcattttgtgaattataaaccttttcacaccttctcggtccctgtgtgatgtcacca  
gtctc

>chr12\_67948933\_67949133

actgggaggtgtctcccagtcaggatacatggggggccaggaaccacttgaggagtcagtctgac  
ccttagcagagcttgagcgtgtgctgggagatctgctctcttcttagccatcaggcagggagct  
ttaagtctgctgaagctgcaccacagccgccccttccccaggtactctgtcccagggagatgg  
gggtt

>chr2\_61867296\_61867496

gtgaaaaccagggtatatacccagacaatgcaactgcttcaCTATTGTCATTGTACCCATC  
TTACCTCACTTAAGAGTTAGTGTACACTTACACACACTTAAGAGTTGTGTAACAAAACAGAAGGTG  
TTGGGCACCATAAAGACACTAAATACTGACTGGGGAGAGAACACAGGAAGTATAAGCCTTTCTT

CCTCC

>chr6\_34106022\_34106222

CCCAGCCCCCTTGGGGTTTCAGCAAAAAGAGCCAGGCCAAGAGCTCCCTCCCACCTTCCTCTCAGC  
TCCAACCTTCCCTGTGTTCACCAGCACTTCCCTTCATCTCCATTCACCTTTGTCTCTGCAGGG  
CCCACCCAGCCCAGGTGCTCAGGAGCGCTCTAGAATTGTGAATGGCTGTGTGGAGTCTGGTTTCA  
ATTCC

>chr7\_148096667\_148096867

TCCAAGTCCATACTAAGATAACCATTTATTAACTCTTTGGCTGTTTTTTTCTAAACTGTAATAA  
ACTCCCCCTCTCCAACATTCAAAATAATAGTAAATAATTCTCTCTGAAATTAACACAGTGTTCCT  
ATTATTGCTTTCACAACACTAAAAAGAAATAGAATAACGGAGTCGAACTGTGGGGCATTCTGGC  
AGGCA

>chr7\_97000464\_97000664

agtggtcaggaaggtgacatttgagtagagacttgattgaaaggttaaggcaagtcctgtgaaac  
tctggggctaagagtgtttcatgcagagaaaaggaaatgtaaagacctcgagcacaactgagctt  
tgcacatttagggggcagcaaggccagctagggggagtgatagagaaggggtagggtcagagaat  
caagg

>chr5\_492200\_492400

agggaggtcagggccgggctgtgagggaggggagggaggtcagggccgggctgtgagggagggga  
gggaggtgtggggactcgtgggggaggggagggatgtcggggcagggCCTGTTGGGGAGGGAGGT  
CAGCGGGGACTCGTGGAGGAAGGGAGGAAGGTGTGGGGACTCACAggggaggggagggaggtcgg  
ggtgg

>chr13\_52001199\_52001399

CATTTACTCCTGAAAAACAGCACCAACAGAACAGATATAATATACAATGTTGGATAACATGACTC  
TTAAGCAAAGGATATCATAACAGGTGGAATTATACAACCTCATAAAAAGTAATAGGTCATACCAAC  
ACCAGCCACAAGCCAAACAGGAATTATGTACACATATCTCTAATGTGGAATTAATGACACATTC  
ATACA

>chr6\_37789422\_37789622

GTAATCATTGTAAGACATATGTCCTAAAGAAAGTCGCTGCCAGTGGCAGCTAATGCTCAGGATG  
TATCAGGTCTCTTTCTGGCAACACGTTTATGTCTTCGGACTGTTACCATGAATGGAATCTTTA  
TCGAAAGACTTATATCAAGGCTTAGAACTAAGGAAATGGAATAGCCTTTTACCTtttatttattt  
attta

>chr4\_183215006\_183215206

ACTAATTCGCACTGAGGTATGAATGAGGCTTAACCCTCCCAGGGGACATTTGCATTTTAAAAGAG  
GAGCTTGTTAACCCAAATGCCTCGACAATGACAATTAGTGGCATGTGTGGGGAGATATATTTTGG  
GAGGTTGGGTCTTTCTGCGCTCCCTGCGTCCTAGGCCATCACAGGCCCGGGTAAACTTCAGGAT  
TTCTT

>chr20\_61848555\_61848755

CAGTGACAGCAGGGACGGCAATGGAGTCCAAGACGGCTCCAAGCCTGGACATCCGCATCAGTGG  
GGTAGCAGACAGCCTCTCACACTGCTGCAGGAGGAGGTGAAACTGCCCCAGCAGGCCGGTCAG  
CCACAGAGAGGACTGCTGCTCCAAGTTGCTCCAGGTCTCCCTGGAGCCCTGCCTCGCCTAAAGCT  
GGGGA

>chr12\_22850333\_22850533

GTCTTCTTAGAATCTAGCATCCCAGCAGCTTTTGAAGTCCCACCAGTGTATAGTCTTAAAAATGT  
GTGTCCATAACATTGAAACAAGCATTAAACGATTTTATCTCTCTAGATGAGTTTCAGCCAAAGCC

TATAATTGTTTTTCTCAGACTATTGCATGGAAGTCAATAAAACCCAAGCCAAGCATTATTGACTT  
TTGAT

>chr2\_184896155\_184896355

TAAAATTAGAGTGCCTTTTAATATTGTAAAAACCCAACAGAAGTTACATGGGATATAATATTCTA  
AGCCTGAGCTCTTAAGTGGTGTACGTCTTTCTTCAGTAAGGTCAATTGGCAGAGAACAATAATGC  
AGAGCTCAGGAGAATGAATTCGTAGCTTTTTCTCCCATCTGGACATGGAGTTACAGCTCAGTCCT  
TTGCT

>chr9\_135358979\_135359179

GGGGCCACACTGTGAAATGGGATGCATCCAGTTTCATGGTTTCAGACATGCTTCCCCAGCTCCCA  
CCATACTGTCAGAACAGCGAGACTCAGATGGAACGGCCTTCACTATCCTTCCCAGCCCAGGGCC  
CACTCCCCACCCATGCCACCTCAGCACAGTCTCAGAAGAGAGCACAGTCTCCTCAAGACTGAG  
CCACG

>chr8\_126429618\_126429818

gagtagctgggactacagcgctgtgccaccacgccctgctaatttttaattttttgtagcaacg  
ggggaggggggggtctcactatggtgccaggttggctctaaactcctggacttgaggatcctc  
tcgcctcagcctcccaaagtgtgggattacagtatgagccactgctcgggccCActggctccc  
agtct

>chr17\_25817073\_25817273

gatggtaaggtgtcgggcaagtgtgtggactctgggatggattgccaggtccattcctctctac  
ctgttatcagcatcctggtgggaccttacagaaataacttctaagtctccggttctgcatttgta  
caagggggctggtgagaggatcaaattgggattatccttaaaaagttaagcatatagtaaattgta  
tgtaa

>chr12\_45165333\_45165533

ATGGCTGTAATTACTATGGCTTTAACGATTTGGCCTTGGCATTCCCTGCCTTTGGATTTTATCCTC  
TCTGTTTAACTCCAGCACACTATTTTAATGGTCCAGGCAGGAAATTAAGCCCCTCTCCCAATGC  
TTTGTTTATGTAGATTCAACTAAAGAAAAGGCTTGGTTTCTTCTGACTTCTTTCCAGAACAACA  
ACCAT

>chr2\_139406130\_139406330

AAAACCAGTTTTATTGTTTTCTGGGTCTTGTCTTATAATtgtaactgtaataggttcattgtttg  
atgcacacagcaagtcaatatgtggagacaccgagttgcagtaagagatttaaatcatagggcc  
ctgcatgaggagaggggaggaaacctcaagtccatctctctgaggaattttgggttagggattta  
agggc

>chr13\_100805599\_100805799

GAGTTTAGATTAGAGGAGATTCATCCTAAATTGAAGTACTTGGGAAAGATCCAGTGGTAGATGTG  
AAACTTGGAGTCCATCTTCTATAATAGGTGGTATCTGAGGACAATAAAACAAGTGTGGATTTAAG  
TTTAAACAAAGACTTAAATGTATTCTTTTTAAAGGATTGTGAAGTACTCAATTTCTTTCTTACAG  
AAGAA

>chr19\_7865200\_7865400

cacacagaccaagcggagaaaggaatcttgaccctctttttgtgcctgtttgaagtgcacct  
tattttttcccagctctttcaaatccatggagctgtgttccgggaaccaaggagaatattgttcta  
ttagctgaaacagggacagaagattttgggtgctcacgtttaaccacagtgccacaataactgcc  
gcacc

>chr2\_15783349\_15783549

TTTTCTGCCTACCAACCATGGGGAATGTGAGCTGGGGGGAAAAGTCTGTTAAAGCTGGTCATT

CATTTTCAGGGGGCCAAGGAGCGATTCTGAAGGAGCAAAGTCTCCTCATGCTCTTGGCCTTTTGAT  
CTACTCAGGCTCTGTGGCAGGAAGACAGGGAGGAATCCCTGATCACCCACAGCCCTCCCCGCTGC  
TGTTA

>chr6\_88641881\_88642081

AGGTAGAGAAATTGGGGTCTAAATCCTAAGACTCATGCTCCCTTCTGAAAAAATTGTATCTGCAA  
AGATCAGCAGCCAAGTGAAGAATACTAACCATATTTATTAACATCTCAGCAAGCTTCCAATTACA  
ACAATACTACCCCACTTGCCCTGTGAAAAGTGTCTCTGGTTAATTTGAAACCTAGCATGTGGCTT  
AGGCT

>chr2\_200848355\_200848555

ccaTCTCCTTCCAATCTCCCTTCAACAGTGTGGATTCAATTAAGTGTGACTTTGTTGATTAAA  
GTAATTCATATTCAAATTTGAGGAGGTATTGAATAATACCGTTGGTAGCTGTGTTGTAGAGGAGT  
GTAGAATTCCTAAGACCTTCTGGCATATCTGAAGAAGGGAAGGGTTGAAATAGGAGCAGCTCTC  
TCTGC

>chr2\_206148755\_206148955

TTAAACTATGCAATTAATCAAGAAAGCAGATTATTCTAGTAGCTGACATTAACGTTTGAAAAGA  
GACAGGATTAGCTGTACTTAGTACATATAAACTGCACAAAGCGAACAAAGGGGAAAAAATTAT  
TTCACCAAGCTTCCCTTGAAAGAAAATCGTTCATCTTGCACCTCTAATTTTTTCAGCTTAATTCT  
GTTAC

>chr2\_208274755\_208274955

gacttgcatggcaatggcgagaagtgaacagattcAAGCAATAATGAGGAAACAGAATCCCTGC  
CTTCTTCAACCGTGGGAATAGAAATGATGCACAGCTTGGGGGAGGAGGAGTGAGACATTTTCAT  
TTTTTGCCTAATATTCTTCAAACACAAATTATCATTCCACATTTTCCCTTAGAAAAATCACCATCT  
CCCAT

>chr3\_46422196\_46422396

TGTGTGCTAATAAATTCACAAAAGCCAAcatattggagtcactcagggagttttacaaatagtga  
ggttaaatccaacctcaaatagttctgattcgatctgcctgcattgctgcccctgtggttccccac  
tgtagaagctccccaggtgattctaagtgtagccaagtctgagaaatactgCCTAAAGCCTGTTG  
GACTG

>chr3\_56155960\_56156160

ATGGATCCCACCTACAGCTCAGCCCCACTCCAGGGCAGAGACACACTACTGCACAACCTGGCAACT  
GACAAAGGACTTCACCAAGACTATTTTGGCTTTGCCAAAATGGATGAAAGGTCACATAGTAACAT  
AGTCTGGTTCTTAAAAATAAgtttgtaatggcagaaacattggaacaacctgtttatctatagg  
ggaat

>chr4\_13649102\_13649302

TGAAATAATTTCCCTATATCCTCTTTTTAACTCACTTCTAATAGGATAACACATCTATTTTTCTCA  
TTCTGAATTCTGGATGATTTTATTGTTGAGGGAAGACAGTAGATATTGCATATCTACTTTCTTTT  
TTCTGTTTtgtgtgtgtgtgtgtgtgtgtgtgtgtgtgtgtgtgtgtgtgtgtTTACAGTTTTATTTAAACAC  
AAAAC

>chr4\_87370176\_87370376

gctcaggcggaatgcaagcaactgtaatacagaggaggatcgctggctcgccacccccaccgc  
accacccccacctcagcaccctgctcacctcctgctgtgcagcctagttcctgtaccagctctgtg  
gccccaggggttggggaccctgtTCTAACTGACTGTGGTTTGTTCCTTGTTTTCCAAGTGTCAT  
TTTTA

>chr4\_134017750\_134017950

caggaaatgtccacacaaaaaagcaagaatagctaggaaaagtctatcttaacatcaataagag  
gagaatcaggatggttggaagcagtaagcaagttctgcAAAAACAGTTATTGTAATAATAaatat  
tcatgtgtacctgttccctcaggtagtatacgtcaccaccaggtagacaaaactaagtcccatc  
tagtt

>chr4\_148547550\_148547750

ttcactgtctcagtcataatcttgcaaagcagtttcaCTAATAAATGAGGAATAAGGTGGAAGT  
TACAAGCCAAGGTAAATGGAGGTAGAGTGATCAGTGTAGACATACAACATAAGAATGGGTGCATT  
GCctcctatgcagtacaggaccatctgtacaacgtcctgacaaatctgtctctatttacacct  
tgaaa

>chr6\_84927681\_84927881

ccaagtctaattggaacaagagacgtggcaaagaaaacagtaaccattggagggttaccagagaagc  
agcagtatccacagagcaaagttaaatgtgaattacaacTCTGCTTTGAAGGAATTATATAAGAT  
TAATTGggggggtataccaagacagggaaaatccaagaatatttccatgaggaagtaacatctg  
ctaag

>chr6\_107424507\_107424707

TCACAAGCTCTGCTCCTCCTGGGTGGACACCCAGCACCCAGATGCCTAGCATGCCACAGACATTC  
CTCTCGCTTACCTGACTATAGGCTACGTAGGCGCTGCCACAACCTACCCAACCACCACAGCACCCA  
CCTCCTAAAGGCTGCTGTGAGCATTCCCTTTGCCTCCTGGACTCTGGAGAACTTCTCATTCTGAC  
ATTCT

>chr8\_38889243\_38889443

ggcgctctgatttttagaattttcagctttctgctctggtttctccccatctttgtggtttta  
tctacctttggtctttgatgctgatgacctacagatggggttttggtgtggatgtcctttttgtt  
gatggtgatgctattcctttctggttggttttctctctgacagtcaggtccctcagctgcag  
atctg

>chr9\_107696779\_107696979

ctaagaacatgcacccaaggtggtggggtgcagcttggttttagggagatatgagacttcaat  
caaataagtttaagaaatacattggttcagttcaaaaaggcagggcaacttgaagtgggggcttc  
taggttatagatagatttaaaatctgtggttgacaattggttgagtttatctaaagacctggg  
atcaa

>chr10\_34703394\_34703594

ACATCCTCGGGTCAAAACCTAAGTTTTCTATAAAAGCTGAATCTACTGACCACAGTTAACAACA  
ATCTggctgggctgggctcacacctgtaatcccagcattttgggaggccaagatgggccaatca  
cttgagcccaggagttcaagaccagcctgggcaacacagcgagaccagtcctctataaaaaaaaa  
aaTTA

>chr11\_133004590\_133004790

TGCAAAGGAGCCCAGCCCACATCAAGCGAGATGAGCCACCATCCTGCTACGACCACCAGGTGGTG  
CTGTTCTCCCTGCACCCAAAGTCATTTCATGCCAGGAGGGCGCAGAGAGCTCCCTGCACCCCAGCT  
ACAAGGCAGCAGGAAACACCAGTAAGGTTCCCTGGCTCAGAGCTGTTGTGCATAATTACAGCCAC  
TTTCT

>chr12\_45525333\_45525533

CTAACTGGAAGGCATAATTAGGAATGACTTCACTACAGTCTTTCAGTAGGTGGGACTCTGGCTGG  
TCTTAGAGAATGGCTTCATTGTGGAAGGCAGCAGATTTCTGCACAGCTGAGTAGAAACAGTGCAG  
GAGGGACCAGGGCTTCCATCACAGTCACTCTAGTGACATGGTTGGGGAAGGAGGAAGTCAGAGTC  
TCCTG



>chr12\_116719017\_116719217

aaagcttagacaaatgtagagagaagtaggactctcatacactgctggtgggaatataaattaac  
accatagctttggatgtccggttcaactagcatcaaaatctataatgcacacagcctttgaccag  
ctgttcgacttctagaagtttatccaacagagatacttgtacgattgtataaagacatgcagtg  
caggga

>chr17\_55989201\_55989401

TTCTTAAGTGATTTCCTCATTAACCAGGAGGCATTTCCTCATGTCCCAGGTGAACTGAATCTGTTTC  
ATTCTCAGGCACCCAGTGACATTCACAAACAGACTTCTAATTATTCACTCGCTCattcactggc  
agtcaaaaaacacttactgagcacctactgtatgtcaggatgcgcaagataaaaaCCTCTTTTCT  
TCACA

>chr18\_59470220\_59470420

TAAAAACAAACCATGAGCTAATAGTTCAATCTTCTTATGTAAATATGAGCACTTAATTTATAGG  
CTGGTTGGTTGGTTTGGCTTTGGGCCAGCCTTTGATTATCACTTCAAACCAGAAACGAAAGGAGTA  
AGTCAAAATAGTGAATTATCATTTCAAGGCcagattcccccaactgtgttctgctagacatcaat  
agaca

>chr19\_38326960\_38327160

AAGAATATCTTAACGCAATGTATCTGCCTGATATTACTGCTACCTACTCTACATCAAATCCTTCT  
CCTTCTCTTCCCCCTCCTTCCATCCGAATGAAATTCTGATTTGGCTTAGGGCGATCATGGACCC  
AGAAACTTCAGCAACATAGAGTACTACTATAGTACTCCAAGGCTGGCATGGCCCTGTGGCTCTCT  
GAGCT

>chr20\_16349200\_16349400

GCTGGTATCTTTATAAAGGTCTGAGAACTTGTGGTAAAAATATCCCAGTCCATTGTTTCCTTCTG  
TTCTGATATTTACCAGTGACTCCGATGAGCTCATTTTTTTAGCATCCAACCTCTTCTCACCTTGC  
TGCTCACTATAAAACTCAGACGCCAGTACGCTCTGCGGGCACTGCAGGATGCTCTCTCCTCATG  
GGAAA

>chrX\_153298806\_153299006

ATGCGGAGGGAAGAGCAAGGAAAAAGGTGTGGTCCAGGCAGAGCCATACATCCCCTTCTGCCGG  
TGGAGAAGAGCACCTACCTATTCTAGTGTGGGAGGCTTCCCCGTTCTTTTCTGGTGACCGAAGC  
AGCTCCTTCTCTACACATCACTTTGGCCCCGTGGGGTCTCGTCAGAAATGGCCACCGTGAGGCC  
CACAC

>chr1\_19332213\_19332413

tagtgttctcgtgatagtggaataagtctcacgagatctgatgattttataagaagaacccttt  
ggcttggttttcattttgtcttgtctgtaccatgtaagacatgcctttttgccttctgcatgat  
tgtgaggcctccccagccacatagaactgtgagtccattaacctctttttctttataaattacc  
cagtc

>chr1\_56840812\_56841012

ATCTGGGTAAAACCACTAAGTAATAGAACTGCACATGGGTTATTTAAATCCATAATACTCACTTT  
GAGTTAGATGAACAGAAAGGAGCTTGCCTTCTCTGCTTAATTCTTGCTTCCCTCCTCCCCAACCC  
CAGCCCATCCTGTCAaaaaaaaaaaaaaaaaagaaagaaagaaaaagaaaaGATACTGCCTG  
CTCCT

>chr1\_64410012\_64410212

AAGAATCCCAGCTGGTTAAATTTAGGGTGCAGAAAGAGATCCAATCGGCAGATAATCCCTGGCCA  
TGGGCCACAGCATTTTCATTTGATTGTGCATTGGATACATTTTCATTCATTTTAAGCCCTTGCC  
TTTCAGTATTTTGTTCCTTGGAGACAGGCAAACTAGTATCAATAGCTCTCTTAGCCTATGTCAA

TGGTT

>chr1\_247550977\_247551177

tagaggaattgcagtgagaaagtgttaattcacgcagagccagctgtgcaggggaacggagtttc  
gttggtactcaaactcagctctcccaaacatttgggcagcagagtttttaaggacagcttggtggg  
tgtgaggaagccagtgagccaggagtgtgctgattggtcagagattaaatcataggggaattgaagct  
gtcct

>chr2\_106886968\_106887168

GGCCAGGAGACTCTCAGGAATGTGAGTCCTGCTAACCCCTTAAAGGGACACTTACAGAGCAAGAGT  
AGCAACAGTGAGAAGAGGGTGGGGTGTCCCGTCACAGCCCTTAGCACATGTCCGCAGAGCAAAGC  
TAGGTGGCTCCCAGCCCTCGGGCAGCAACACAGGCCCGCACCTCCACTGCCACAGCTATGCTCT  
CAGCT

>chr2\_240362063\_240362263

AAGGAGCTGGTGGTCAAAATTCCTCAGCAGGTGAACAGAAAGCCAGGAAAACATCTTCCCAGGGA  
CCTTGCCAGCCCCAGGTGCAGCTGTTGTTCTGGAAAATTACTGCACTGCATTTTCAGAAGCATCT  
CTAATCCCCAAATCTGTCATCGCCTTGCCACCCTGGCCCAGCTTTTGTAAAAGGGCAAAGAGAA  
GAGCA

>chr3\_116868310\_116868510

ctaactaattcagtggttaattctccgattgcacaaatgagaaagctgaagctcagagaaatt  
catttacttgcccaaATTTCTACTTTCTACTTCCCTATGAATCTGTAACCAGAAAAATGAATAG  
TTTGTACTTATTTTATTCTCATTGTCCATAGTTTAAAAAAAAAAATGTGTAATCTACCAGCTGCC  
CTGAG

>chr4\_149036550\_149036750

AATCAACTAGAATTTTATTTCTAGGTGATAAAGACCTAATGAAAATTCACCTTGGGATATTAACA  
TTCTGATTTTGAACCTGCTCTTACTTTCACTTCTTAATTACCTATTTATTTGCTAATTTCCATA  
ACTGGTGTAATAATTATTTACTTTGGTCATCAGCACTTGGAGACTTGGAGATGGTGTGAGTAT  
TGTGT

>chr4\_150105350\_150105550

ctgattttatagctgcttgctcagaagcactgggtgacgactaagacttgcaagtggtcctctgaag  
tggggggcagctattgtggagcctgagtccttaactcaggatttgatgctatctccaggtagatag  
tgttagaagtgagttaaattataggacaccggccgggctggtggctcatgcctgtaatcccagc  
acttt

>chr5\_167155022\_167155222

CTGGCCCCAAGTAACATGCCAGGTAACAGTTTCAAGCCTGGGTACTTGGAAAAGAAGGCTGAGTA  
GGTTGGTGGGAACCTGGGACCAGTCTTATGATGGAGGAATATGCTGTTGCTATTCTTGGAAATCTT  
TTCTCCACCCCACTTCATCCCCTACCCCTTGTGTTGGCAAGATTTATCTTCAGGTATCCAGGG  
AAGAT

>chr7\_100805080\_100805280

tagctgggcataatggtgcacactttagtcccagctactcaggaggttggggtaggaggatcac  
ttgagcccaggaagtgcaggttgagctgagctgtgattgcaccactgcactccagcctgggcaac  
atagtgagaccctgtctcaaaaaaaaaaaaaaaaaaaaaaGTTAAGAAGTGGCTTTAGCCAGCATG  
TCTCT

>chr7\_146110867\_146111067

AAGGGGACTTTCAAATAAGCCTTTAAAAGGAAAGCACTTTTTACCTATATTTTTCTTTTCTTT  
TTTTTCTTTTTTAAAAGTTGAGCTTATAAGATCATGCCTGGTGAAGCTGTGTTTCATCCACTCCTC

TCAGCATTAGTGGAAGAATTAGAGTATTAACGACCTTATAGACCAGGTATTTTGTAGCCTCCTTT  
ACAGT

>chr9\_27671600\_27671800

TCTTGGGTAAATGAGCTGTTTCTTGGGACATTATAAATCATATTTGGAATCAAGTTATTTTCAA  
GCTGCTTTTGAAGTCTCGATGCTGTGCTAACTGAACAGAAAATGTTAAATGTTTGGAGGAGTAGT  
GCAAGCTCTCAAATGCTAACGGCATGAGCTGGACTTAAAAAACAATGGGATTTATACCCTCTG  
AGGCA

>chr11\_44978024\_44978224

TAAGGCCTGCCACTCCTGGACCACCCACCCAGTGAAGCCATACAGTTTGGGGACAGTAAGTC  
ACCTGCGGACCGACAGGAACATCTGACAAATAGATTCTAGTTTATAAATCTCTTTAGAGTGTATG  
AGTCTCAAAGCCTACTTGGGGGCAggaaaatgtagaaacacaaattctcatttccacctcagac  
aactg

>chr11\_88162152\_88162352

tatttgcaactgaaGCAACTGTGCTTTATGTCAGATAAGATAAAGATTAAAAAGGAGAAAAAGTG  
ACATGTTCTCACAGAGCTggttctaaatgtggtctgaagaacaacagcaatagcagtactgccttg  
gaactggatagaaaagaaaattcttgggccccatctgagacctgctgaatctctgcgggggcaag  
ctagg

>chr14\_57325447\_57325647

gcacgaagccctgTGCTTGTACTCTATGTGCCTATTGCATAGTGACCAAGCTGTCGGGGCGTGG  
GAGAAAGGTATGAGGTGAGGCTACAGAGTTTTACTGGCCTTGAAGATCATGGTAAGGGTTGAGG  
TTATATTCTTTTTTCTTCCCCGCAAAGACACCATTGTTCCAATTTGTTATTTCAGTATAGTCAGA  
GTTAG

>chr14\_73401447\_73401647

tctgtctcccatattaacaatcggtgcctccaagccaggtagcacagcttattatctctgcca  
ctccccagtgccctcacatggagtgggcgctttgtaaatgtgtgtggagtAGTAAGTGGAAATAAC  
CCAGAGCAGAAAGAAGCTACCTGGGACTTAAATGTAAAGTAGCCACAGGTTTTGTTTTGCTTTGC  
ttcag

>chr18\_52882602\_52882802

ATGCTAATGGGGGCACCAAATGAAATATTTCTCCTGGAAAGTCCCTGGGCAAGTTGGGAAGAGA  
ATCTGCTTTTCTCCTGGCTATGCCAAGTGCTGTGTGGCCTCCAGGAATTCAGAAAGAGAACTT  
CCACATCGTGTAGGTGCTGGCAGAGAGGATAAATGAACACATCTTCATTAATTCGTTTCTGCCT  
ATTGG

>chr19\_7211800\_7212000

ACCACAGGCAAGAGGGAACGAAAACACTTCTTCTGCCAAATAGAGCTTTGGAGGGAATATCGGTT  
TGTCTGGGGCAGGACTGGGTACGGGCTACACGCCTTCTCCTTGTATTCTCACGAATTCAACACC  
TGGTAATGCCGGGGCCGTTTCCAAGTCACAGACTCAGACTCTGGGGTGGATAAATCCCCCATCA  
CTGTT

>chr20\_4031000\_4031200

ttctcttccaactcactctgctcctgatgtgattctcaacacagcagccagattaatcctttaga  
ggctgagaccatggttccctcctctgctggaaccctccaatgttccaacagctcccagcccactct  
aagtataagccacagtccttacaatgtctgtgaggccctaggtgatctccatcatacttccctcc  
tatca

>chr22\_42813856\_42814056

CGGTGTCTGGGAGGGCCCCCGCCCCGTCCCCGGGCTTGGCTGTTTGTGTTTGGAGTCTTCAACTCCT

CTCCTGTGCCTCCCCACCCCCACAGAACTGCAAGCGCAGACATCTCATCTGGGCAGCGCCGTGGA  
TCCCTGCTTAGTCTGCCCACCCCTGCTTTACAGGAGACTGTGTTTTGGGGGGTGACACACCCTCCA  
TCCCT

>chr1\_81717612\_81717812

aagaggatgacctcccctgatagaggaagaccattattcctgtcaagagtagctttgctcccctg  
caagaacctgcaaacagctcaaaaaaaaaaaaaaaaaaaaaaaaaaCCAAAACCAATAAAAAGTCTAT  
AATGTAAAGGACTCCAGGTTAAGTAATTTTCATTTCTCTTGTCTTTGTCTAAAATTGTAAAAATTA  
CCTGA

>chr1\_181561577\_181561777

CCTCTGCTTGTCTGCCTCACTACAGCTCAGCTCCCTCCTCCAGTGACCGGTGGGGGGTGGGGGG  
TGGGGAACAATGAAAAGTAGGGGAAAGGTAATTTATTTTCAGTGTTTACAGAGGGTTTGCCTGTA  
ATTAGCAGTTTATTTCTGTGACACAGCTGGCCTCCTCAGCTTGAACCTGACTTTGAAATGCTCT  
TAAAG

>chr2\_15268349\_15268549

gcctttaattatccttttaagtctaatatccttacttttgagcagaattattaatgtgattgac  
agcgggggactactccagacctactgggctgttacatgatatggaatagatgcaccataatacc  
ttccaagatctgacaaattctaaattccaagcacatctgttctccagggttttggttaagga  
ttgGG

>chr2\_118309530\_118309730

ATCTTACCTTGGTCCCTCCCTCTAAGAGGCATGTAAATGGAACAGGGACTGCAAAGGACTTCTCT  
TTGTTCTTAGCTCTCCCTGAGGGCAAGCACATTTTTGCAACACAGGTTAGGCTCTCTTTTGCCT  
TTCCAGGAATGTGcacatacacgtgcatatacacacacatacactcacacaTttgtgactttcta  
tttac

>chr4\_38123605\_38123805

TCAAGCACATTCCCTGCATTGTGCACCCAAATGATCTCCCGATTTAAGACCCCCTGTGTCTCACAG  
AAGCTTCTGGGGCTGAACTTTCTCCGGCCTTGGAGGGTTGGACGCTTTGAATGGGAGGAGTGGTG  
GTGAGTGGAGCATCTCTGGCAGCAGGCATTTGGGAGTCTCTGGCAGGAATCAATCAGCGTAGTCT  
CCAAA

>chr4\_102248977\_102249177

ACATTTCAATAAATATATATTAACAAAATGAGAACTGTCAACAAAACACTCTAGTTGTATGAACG  
TTACTCAAATTTTTTCATCTACATGGTACTGGACACCTTTCATAAACAACAACCAAAAAAATATA  
TTTGAAGTTCAGGGTCCACAAAAATATCACCAGGGAAAAAAGAAGAAAAAGAAAAATATGAACCT  
AAGCT

>chr4\_123746750\_123746950

TCTTGGAGACTTAAGAACAAATGCACCTTATGCATGGCCTTTTGAAACCTAATGTTTCTACAAGGA  
GGCACGTCCATACTTGCAACTCCTTCTAGAAGCTTCCCCAAATCTCCTGCCTCCCCACGCTGAGT  
TATCCGATGTCTGAAATGTACAGCACTTAGTCTTActcttctatggcctactttctactgctat  
ttgtg

>chr5\_54987643\_54987843

AAAGTAGGCCTGCATAGTTTAAAAAGCCCCCAAATGACTTGACATATATTATCCCCTATAAC  
AACAAGCTCCTTCCCTCCACCTAAGTTTAGTTAGACCCAGTTCCTACTAAAAGGATAAGCGAACCA  
TCATACTTTCAGTCCAAAGCAGTTATTAATAATTATGTGATTTTTATTGCCACCTAGTGGAAGAGA  
TAGAA

>chr8\_10195190\_10195390

GAACCTTATACTCCTCCTCTCTCGGCAGCTGGTGCTTCCCTGTTCTTCCTCAGCCATGCTGGGGC  
TCACTGCAGCCTCCTCTGCTCAACTCGCCTGGGTGCAGCCATCTTCAAGAAAACATTATTAAAGC  
AATATTATTAGTATGCAGCAAGGTGCCTTCTTTCTGCTAAATCAGTTTGTAAAGTGGTCCTCACA  
AATGC

>chr9\_77102580\_77102780

GTAGCTGCAGTTAGCTGTATAGTTTTTATTTCAAGGAAAAGAAATGTGGCGATAAACTCCAAGGAT  
GAGCTCTCACAAATTGTAGAATCTCAAGGGAAAACACAGATTCCCATCTACTCCTTTAAGCAAT  
AGAAAAGATAAAAACGTTTTGTACTAAGAAATGATCTGATTTTGGTGAGTGTGTTGAAAAGAATG  
TAGTA

>chr12\_52685533\_52685733

AAAGTGTCTTGCCAGCAGGGCATTCCCTTCATCTGCAGGCATTggggaggggaaggggaaggcagag  
gagaggacgagaaggaggagtagagcctggcgaggggaagagaagggaggccaggtgctgggaga  
aactgggaggagGAGACCTGTGTGTTAAGTGTGATGTGGGGAGAGGGGTTTCAGGAAAAGGCTGAG  
GCATT

>chr12\_111471017\_111471217

AGATAATAACAACAGAAATCCCTATTCCAAAGGACCTGAGGCCCCGCCCTCGGCCCCCGCCCGTA  
AAGAACCCTGAGCTACTACTCAGACGAAGCCCCCTCCCCGCCAATAATAATAATAATATGCGC  
GGAAACTGTGGGCGGTGGTGGTGACATTTCCACGACTCAGTGGCGCCCCCGGGCGGCTCCCACC  
CTCCC

>chr13\_54784999\_54785199

ttgtggttggaacacttttgacatatattttcacatatattggttgtaagagaatggaatgtgcccc  
gggtgactttgctggggaacaccactgaaagccttgacactgatttcttctaacctttccctatgt  
gccttttccctttgctgatttgaaacagttccctttcattgtatacaccataatcataagtacaa  
caatt

>chr14\_99610047\_99610247

cttcaccatgttggccatggttgccaggctagtctcgaactcctgacctcgggtgatctgccta  
ccttggcctcccaaagtgctgggattatagggatgagccaccgtgcctagccaaaatttgcatc  
tctaacaagcttcaagctgtggccttgccaggggatcaggcattcagactcactAACCTGAATG  
TTCTT

>chr15\_49683508\_49683708

caagcatgaaaataagggaaaaggcttgagtcccttcaagagaaattccaggcatatagctagcc  
tcgagaagtaaatcagcaactcaataagcaagaaggacaagatgtttggttccctatagaaacta  
aagatgacacatgtccctgagttgtttttcagaaaccagacccccatcagatggaaaaggccaa  
ccaca

>chr16\_52535899\_52536099

TCCCTGCCTCCGCAAGTAAACTTGAGCCATGCCAATGAGGGAAAAGTGGCCGCGATTTCCCAG  
GTGGCTTAGTAATACACAGTTTTTCTGACACACTGCAACTCCATTCTTTCTAAAAGTTCCTTCCA  
AGCCTGTAGGCACTGTAAGACAAACAGCTaagcacttccctgagtgccactactatgtgccaggctgt  
atgca

>chr18\_35105602\_35105802

TTAGGGTTCCCTGGTGACTGGCTGATGGGTCTACAGTATTTCCCTCAAACCTCCATGACAAGAGAA  
TGGGATTCATGAACATTTACATTGATCAGACATTATGCTGAAGGGAGGAAATGGTACTTTCTCCC  
TTTAAAGAAGGATCCTGCATTTTACAAAATCGAAAATAATATTAAAAACCCCTTTCACAAGATC  
CCTTG

>chr18\_43185602\_43185802

AATATTAAGATTTGGTTAttaattaaacttgaccaaggttaaacagctggtaggcagcagagct  
aaatttagatcccaggtctcctcactcccaatgcaatgatttttcttctgatttgccatgtcagA  
GAACACCTGGTCCCTCCATTTTATCCTCTCCAGAAAGATAGGTTATCAGGAGCCTAGCATGGAA  
CAGCA

>chr19\_5689800\_5690000

tgcccaccaccagcctggctaattttttgtatttttagtagagacggggtttcaccgtattagg  
ctgggtctcgagctcctgacctcgatccacatgcctcgacctcccaaagtgctgagattacagg  
cgtgagccaccgcgcccggccTAATGGGCGTTTTAACAGTTCATACAGTTTGGtattattattcc  
cgctc

>chr20\_57987605\_57987805

CTCATCAGTAAACACCAGCAAGCCACCAGCTGCTACCACCGTGTCTGCAAGAGTCCGACCCCAA  
ATTCTCTCCCTGGAGCCCTCCTTCCCTGAAGCCCTTTCAGAGGGATAGAATGTTTTCTTTACC  
AGTTAGCACTCAGGAGTAAAGTGCCTGGGAACACAAATGAAAGGGTACTCTCTTGCAGCATTT  
TGCTG

>chr1\_53056212\_53056412

GAATCATACATCAGttcattcctcaaattctcactgcgctccaaccaagtaccaggccccatact  
agataccggggacttagagatgaataaaaccctacctcattcctcaaagaactcacagcatagca  
ggatggacagaTTTCTTCATTCATCCAAGAAATATGTATTGagtgcccatcaatagtacaatgg  
taaac

>chr2\_36523696\_36523896

tcaGGGAGATGGTCAAATAGTGTTTTTCAGTAGTCTTTAACAGTCATTACATTACTCACGTTAGC  
GAAGTGCCTCGGTTTTAAAATAAATAGCTGCACAACCTGATCATAAAGAAGTACTATATGATCATT  
TGCAGAGGAGCAATCTGGTGAGTACACCTTTCACTAATGTTTCAGGCAACAAATTTTACCTAAA  
TACAA

>chr3\_132911110\_132911310

gtattgaaactagtttactcctcttattttggacacattgagttaggagatttgagcagtagctttt  
ctgaggagttgtccagcagggcatgtgggaagctcagggaggtgtccgtagttagaggcatcacta  
atgcagaggttaactaagatttgagagttttgaagtaattgcctagggagagtgtttagaggaaga  
aaaga

>chr3\_148721510\_148721710

ccatgctgctggaacccgggcccacagtttgaggagcaCTATTATAGGGGAACATTCCTTTGGCT  
GAGATGCTGGGGCTCATGTCTAAACCAGAATTAACCTCACTGCCCTGTTATCCACAGTAGACAAGC  
CAGCTGCCAGCAAACCTGTGGAAGAGCACGCAAAGTACACAAGCATTGAACAAATGCACAGATTTA  
AAAAG

>chr4\_5786899\_5787099

CCCATTCTTCCTTCTTAGAACGCATGGGAGGCCTGGAGGTGCATCAGCCTTTCTCTGCCCTAGAG  
GCAGCCTGCGTGAGCCTGGTGGGCTCCAGATGGTGGAGCAGTCTCAGACAGCCCTGAGCCCCTGG  
CAGTGCTGTTAAGCCATTACCGCAGCCCTGAACCGCCTGCCCTACATGCTTATTGTCAGAAACA  
AGCCC

>chr5\_155351222\_155351422

ATCTAGTCATAGCAAACCTAGGAGGAAATACTCATCACTAATGCACAAAAGAAGACAGAACAAGG  
AGGAGGAGGACCTGAATGGGGGACAAAGGCACCTGAATTCATCAAATAGTTTATTGTCAGCACAG  
AGGAAGGGATGTCTTGCTATAGCAGGAGAACTTTCATCACAAATGGATCATCAGCCTCTTGGCACC

TGTTT

&gt;chr5\_174973994\_174974194

gtagagacggggtttcaccgcgtagccaggatgggtctcgatctcctgacctcgtgatccaccg  
cctcggcctcccaaagtgctgggattacagggcgtgaagccaccgcacccggccccaggtgtttata  
tctattgggagacggcctttccctggcgccggctgccaccaagtattattttagagacacagttc  
acaac

&gt;chr8\_34895858\_34896058

atccagctatcatgctccaaaatatttgcccacactaaaacctgcactcaaagtgtatagcagc  
tttattcataatcaccaaacacaggaagcaaccaaagtgtgctccaatatatgaatagataagca  
agatgtaatacattttaacaattgaaatgtttttcagcattaaaaggaacaagctatcgaaccac  
aagaa

&gt;chr8\_56044446\_56044646

tgtTACAGTGAGCATGCTGTTTACACATGGCCTGTGCACAGTCTTAATGAGAGCCATTCTGGGGA  
TAAAAATGATCAGATGTCTGCCCTAGAGGAGCAGTTTCATATGGCAGGTGTAGCGCAGAGCCGAA  
GGGTGTGGCACTACCAGATCATTGGTCAGGCCATGGGAATGTCCAGGTAACCAGCAGTCAGCAGT  
CATTA

&gt;chr9\_109521179\_109521379

aggcaagtcataagaatacaaggaaatacttactaatcataaggaactgacattcacaatacatga  
agaactcttaaactcaacaacaacaaaaaggcaaacacctgattttaaaataggcaaagggtt  
gaatcaacatttctcccaagaagatatacacatggccaataagcacatgaaaaaaatgctcagta  
ccatt

&gt;chr9\_138993979\_138994179

CCAGAGGGAAAGTGGCCAGCAGGGCTGCAGGTGAGGCCCTCCGTCCCTCTGGGCTACGTGGGCGG  
GCCGGCACCCCTGACTCCCAGGAGTGACCAGGAAGGCATTTGGCCCTTTTCAGAACAAGTCACTG  
GCCCTGCTCATCTGGGGCTCCTGTTCTAGTAGCAGGGGTGGCAGGCTGGTTAAAAAAGAAATCC  
AGGTC

&gt;chr10\_88626620\_88626820

cagcaagttatctccttgaacctatcttttctctgtaagtaggaatgattttacttactgt  
aaggatcacagagatgggataatgcacgtaaaactaatgtgtaagttataaaaATGACAGTGACA  
ATGGGATGCTAAGCAGGTACCATTAAATACCACCACATATCTGAGTTTCTCTGATTTAATCTGCA  
CAAAA

&gt;chr12\_40500533\_40500733

TCCACTCATGTAACGGGTAATTCCCAGAAATAGAAAGAAAACCTCAAGACCCTGATTTGTGATTG  
GCAGGCAGTCTCCATTTCCCCGCCCAACATGCTAACCAAAAGGTAGGATAGCTTCTCTCCTGAG  
AATCCCCACTGTTGCCCTCCATGAGGCACTGTTTTAACAGCCTCATTACTTGAAACAAAGCAAA  
GATAA

&gt;chr12\_113950017\_113950217

CAGAGCTAGGGGTGGGGCTTGAATGGTGGGACTCTGCCCTGGGGAGGAGGCAAGACCcttgaatg  
caggaagttcactctcactttcccctctggctggtgaccaggctttcttctctctgggcctcagt  
ttccctatctgcaagtagggagcagtttaaatgcctgtaaggtGGAGAGGGAGGGAGTTACTGT  
GACTT

&gt;chr13\_108867199\_108867399

CTGACGCCCTCCCAGACCCCCACCTGACGCCCTCAGGCCCCCGCCTGACGTCCCAGACACCC  
CCACGACCGGATCCCCAGACCCCCAATCTGACGCCCTCCTCCCTACTTGACTCCCCACACAT

CCCCGCCTGACGACCCCCCGACCCCCGCCTGACGTCCCAGACACCACCCATCTGATCCCCCAGA  
CCCC

>chr13\_115070298\_115070498

TCGCTCCGAGCGCGAGAGTGTGGCGGAAACAGGAGGATCTGCAAGGCAGAAGGTTGGGGACTG  
GTCCTGAGAAGAGGGAAGAGGCAGAGTGTGACTGACGACCTGGCCTCCATGGACGAGCAAG  
GGCATCCCAGAAACGTGTAAATGACCCCGAGTGTGACTGGGAAGGAGAAGTTATTCCTTACCAGG  
AAACT

>chr14\_102411647\_102411847

cttgcaaatacgaatcccgcctctatccctttgagatgtatatctatctccttcagctcaggagt  
gtctttcttaggacctgaaagccgtcctttgaaatgtaatcatgaggaaggtagactcctcc  
agtctctgtgggaagacagaatcctaacttctataattgacagctgggctaatacacatgacattg  
accaa

>chr20\_30511939\_30512139

cattcctctcacctccaccccgggcctggccaccatcctcttcctcctagacaaccacgcccgcc  
ccctcactggtgcctgcccgtgctctgcccacttccactccaccccaacgtggcagccagagagga  
gacacccttccatggcttcccatggattgtgagacaaaaccccaaaactgcatgggacctgacct  
ctgcc

>chr20\_38724786\_38724986

cctggactacagctatatcttggtgccacccttcttcccaatccaaagcctcctttgcatcctcc  
tcttgatccccaccttaaccacaagtataagatacctctactccctccttggcgaccttac  
catctcattaaaacctaatacacctttaccccaactcaacaccaatatcccatcccacagtgcgctt  
taaaa

>chr1\_82130812\_82131012

tctgcatggcattttcaaaaaaatcttcaagacagatggataaactgattatttagaattagta  
gagtttgccaagtaagcatgtttatgaagaccatttgaggtagagaacatgcaaagatacATTAT  
ACAAACAGCGTAAGTACCTGGAAATCACAGAGGAAGTGTCTGATATCAGTTGCATTTTCCTTTA  
AAAAT

>chr1\_110031277\_110031477

TTCCAGATTCCCCATCCCAAAGGAGGGTTTTGGCCCCATGGGGGAATGAAACAAAGACACATGA  
ACACAGCTGCAAATATGCCACCTCTCTCCCTGCCCCCAACTTGCCCGGGCCAAAGCACCCCTGC  
CGTCCCTCACCCCTTCTCAGTTCATACCTACTCCCCAGCTCTCCACTCTGCTGTATTCTAGATCC  
ACTCA

>chr1\_164056176\_164056376

TCTTCCCTGATATCTCTGGGCATCTGTGAGGAAGAATTCATGTTACACAGACTCAGTCTGATT  
TTCATCCATAACCTCATAGGACAGATTGGCACCTAACTGGTGCTCAGCTCCTGCAATCACAGCCT  
CTCATTCATAATGAGTTGCTGTTGCTCTTACATTCTGTTTTACCCAAAATGATAACATAATTC  
TGCTT

>chr1\_248056977\_248057177

gttctcagatctccagctgcatgctgggagaaccactgctctcttcaaagctgtcagacaggac  
atthaagtctgagaggttactgctgtctttttgtttgtctgtgcccctgccccagaggtggagc  
ctacagaggcaggcaggcctccttgagctgtggtgggctccaccagttcagacttccaggctgc  
tttgt

>chr2\_80109692\_80109892

caggggaaaagcatggcctggagctatagaaatggatgtcacccttaccctcccaggaagctta



gtgtgtaggcagttgtacctcccagggctgggtgctgcccctccgccaaggagcataaatggct  
tagacagcaggcagccacagctgtgggtgctgggtcactactccccctgggagcttggcaggcttaa  
gcagg

>chr3\_65376360\_65376560

ATGGTTAAAAAAATTACCAGTATTTTTAAAAATCAAGAGACCACCTTAAAAAGCATTTAATTTCT  
TCTCATTAGCCCAAATCCCAGTCAAACATGTTAAGTCTGTGTCATATCAGATTTGTGCTCAG  
AGCACATCACAATCTCCACTCGGAGAATTAATGAGACAGCAGCTCTTATCTACCATTCTTTTAA  
CTGAA

>chr4\_140774150\_140774350

TTTATAAATAGGAACACACAGTACACACTTTACTACTACCCTCTTGTGTTACAGACAAGACCTGA  
CATTACAGAATGACTAGGTGACCAGAACCAGAAAGTGATTCAGTTACAGAACCACAGTCAGCCCT  
AGTATCCACACATTCCAGGGAATCTACACTTCTCATTTCTGCTTCCCTTATACATACAGACTAA  
GGACA

>chr6\_38443822\_38444022

CCATTTGGCAGGCTGGAAAAAATTAATTTGGGGTTGCCATTGTGTTTTTCACTCTGTATAATTTA  
ACCGTTAAATATCAAAGGTTCACTGAAGTAAATGAAAGTAGTTTTTAAGCTTAACGGTTAGACAC  
TTTAAAAATTGTTTTCAAGGCAGCACAGCACAAAGGCCAGAATCATCTGATCACAAATTCCTCCC  
AGGGA

>chr6\_41540422\_41540622

CCAGCCAGAGGCAGACAAAGGAAGTTTGGAGTTTGTGTTTGGCTGCCCTCACCACAATCCA  
AATTAACCAGAATTTGCTAGTACCTCCTCCATCCTGCCAGCCAGCGCTTGGTTTCTCTCCCT  
GTGCAGAGCCCAGTTTcaggtctggtacattcaggttctgcttttgccactgtgtcccgttgggc  
aatc

>chr7\_89778864\_89779064

TCCTTTTTCTGGCCTAGAGCATAATACTTCAGCCCTGGGGGCCCACTCACCTGGTATTCTATGT  
ATATGGTGCCCCCTGCAGCAGCCCTGGGCTCATTACAAGTAACACTGATTCTTAGGTGTTCTATG  
CCTTTTTACCAATCTCTTTAGAGGAAGCAGATGAACATTTAGAATTTTAACAGGGAATGTTTACC  
TGAGG

>chr10\_1563600\_1563800

ccaaaaataacattctaaggccccctaagcttctgaatgcacttctccccagccagggctcttt  
taaaatttaacctgagagactgtttgaggcaatggttgggaagtctggggtcagacatgcctcatga  
tgctctccggcattaacagcaacacagaccttaagtctgataagaacatttacagcctcttct  
ctctg

>chr12\_64453733\_64453933

AAGTCCTTTTTTCTGCTTGGGGAAATAGCACCCCCAAAAGACATGGTTGCAGGCCCATTTACTTG  
ATGATTGTTTTAGGGcattgcttcttagacttttaatgtgcatatgaatcacctgtggatccttt  
ttaatcttcagattctgaaataggtcggggtggaactcaggatcctgcatttctTTTTTTTTCTT  
Tttcc

>chr12\_81243469\_81243669

cttttctccacccccaccattcctcaaacatattgaactctccaagttacctaggtctctgcaca  
tgccgtttactctgctaggaatgcccttccacctggcagactcttattcatccaaatttaatatg  
atgataaaaggtcaaattcaaattgtctcctctattaatgttttctgcctccctcaagCAGA  
GTGAG

>chr13\_53480999\_53481199

TTTCATCCAGCTTAAAAAGgttaagtgagaaaagcaaggtgcaggaaagcgtgtataagaaga  
tctcagtttttgtaaaacagaCCATGACAAGCTGCTCAAACCTCCGCATGTGTACGTAAAGGGCTAT  
ACTGGATTACACACAGATGAAAAATCTGGGACACAGGCTGAGTTCTTAAACTTACTgccgggagc  
ggtgg

>chr13\_113273999\_113274199

aaaagaggcccaCGtgtggcaggagaacagggaatgagggtagccaagggataaggcagaagcaa  
aagaacagcaggtgcagccagttctgggcaggatcaggcagcactcaggccacagcctcactcct  
gaaataacgagactgtctccacttcagcctctgattggccatgagctgcctccacttcagcctct  
gattg

>chr16\_52295899\_52296099

TGAGGTGCTGCCTGCAAGGACACAGAAGGGTCAGAAGAAACAGGTATAAAATAAGAACCAACTTC  
ATTGGCCCTTCCCTAGCACACAATCATGTTCAGTAGACTGGACCAGTGATTCCAACACAATGGGA  
AAGGTTGGGATTAAGAAGCGTTCTGTTCCATTTAGTTCTTTTCCTGTGTCTCTCAGCCTCAGTT  
GTTTCG

>chr18\_37227602\_37227802

acaggttgtttgttctaatacctatggataagtctttccctcattttagaatgttgcttcacatta  
atgtggtgaccagtacttagctgaatacttgagtgcctcttgccttagtccatttggtgtgtgt  
aaagaaatgcttcaggctaggttaattactaagagcaaggtttatttggtttacaattctgcagg  
cagta

>chr18\_46509602\_46509802

TCCATGGCAGGAAAAACATCTGCCAAAGACATTCCCTTAAGATGTCACCATAAAAAAGGCTTAAGG  
TATTAGTTCTCTCTAGGGCATTTCAGACAGTTCTTGGGGAATAGCTGTTTGTA AAAAGAGCTCA  
CCATTTACTGGCCTTTTTTTTTTTTTTTTTTTTGATCACACCTTCTAAAGTATAAGCTGTTGGTAGA  
AAAGC

>chr22\_18808600\_18808800

GCTTGAAAGCTCTATCTGTGCTGCACTTCTTGGTCCAAAAGGCGCAGGGGGATGGGGGAGAGGC  
ACCGGGGTGATGGTGCAGGCTCAGCTGTTGAGCCTCATTCCCCAAACACAATGTGACAGGTATCA  
ATAGTTCTGGAGTTGATcatttcacagaaaggaaactgctgtcaacctgcccaggccacacagc  
tagtc

>chrX\_104878144\_104878344

AAATCAATTAATCATATTGACTGACTTTTCCCTAGTTCAAAAAGAGAAAGATAAGTGATAGTATCTG  
AAAAGAGTACAAAAGGAAAGGTACATTTTCCATTCTAATAATCAGGCCTACAATTGCTCTCAT  
TAACTCTAAGACTAAGCCCCCTGCCACTTACCTCCAGTCACCACAATCCCTAAGTAAACAATTT  
GCCAT

>chr12\_105051670\_105051870

AGCCTGGACCCGAATAAAGACACGCTTTATTTCCCCTTCAGTTGACGGAGGGGGATTTTGAAGGT  
AGCAGGGGAAACAGAGTGAGCAGTGTTTCAGGGACGCAGCCCACCTTCCTGGGTAGTTTCCACTG  
CAACAGACCCGCCGAGGCCAGCCAGCCAAGGATACTCAGAGTTTTACAAGCATGCTGTGTGGACT  
GGGGC

>chr2\_67556696\_67556896

GATAATTGAAAATGAAATGGAGAACCTCTTAAATGGCAATGTATTTGGAATATCCAGGGAGTT  
CTTGAAATGTGAATTCTAAGGAAATGGGTAGTACTTAAGAAGAAAAGATTA ACTCAAACCTACTA  
TTTCAAGTGATAAACTGCAAGTGAATCACAAGGGATGGAGCTGCCAATGCCTGCAGAGGAAAA  
CCAAA

>chr15\_67841546\_67841746

TAGGTGTTCTATGCTTATTCAATTAAGCTGTCTCAGTATACTAATTTTCATGTGTTTTCAACTTT  
ATAGATTTATTTAAGCATTGATGTCAGATTATATACCCCTTTTTAGATTTTTGTTGTAGGCTAGAT  
TAACTTTATTTCCGTGTCATTAAGTATGTTTTCTGTTGCTTAAGAGTAAAGGTTGATAAGAAGT  
TTTGT

>chr12\_131433047\_131433247

caaggcagcgtctcttctttctttcgcctattaaactttctgctcttaaactactccttgtgtgt  
ccatgtctttgatttccttagcaggagacaacaaacccccgggatttccccagacaaacgatgct  
gcttcaTTGGGACTAACTTACGCGAGTgtctctcgttcttggttctctgagagcagagcccagtgcc  
aacac

>chr3\_193902106\_193902306

AGAGTGAGGGAAGTCTATCTCCCTGACAATTCCTAAAGTGATTTATTGTGGAGGTCACAATAGT  
CCCTGTTTGGACCTGTTACAGTTTGCTAAGCTCCACTAAGCTTAGGTAGTAGGAGATCCTTCATT  
GGAACACTTGTGTTGAAGGGAGGAGGAGGAGGAGGAAGAAGCCGCCACTGCTTTGTTTTTAGC  
TCTAG

>chr6\_6169801\_6170001

aaggttggtcatcctaGACTagtagttgtcaataggaggcaatggtatccccaggggacatttgg  
caatgtctggagaactttttgattgtcacaactggggtggagggtgggttactactggaatctgg  
tggataggggccaaaaatgcagttaaacatcctacaatgcacaggatagtcccacaacaaagtat  
ccagc

>chr7\_74899664\_74899864

TATGTCACACCTCAAGCAGATTTGCAGTCCCTTGACAGCAGCCTCATCTGGCACATAAAGGACCT  
CTGCCTCTCTGCATGGCTTCCCAGGGCCCCGAGAACAGTGAGGCTGCCTTGGCCTCCACCTGCT  
GCTCCAGAGGGCAGCACAGCCCCGACTCCATCTCCCCAGCCCCTGTGGGAAGGGGGACGTTTCT  
GGAGT

>chr12\_8680133\_8680333

ccctggctccgcaggggaaaagcacagcctgaagctacagaaatgggtgcttcccttccgcccgc  
cagggagctttgcatgttaagcagctgtgagtcccagtgctggctactgcccctccctcaaagag  
cgcaaacggcttagacagcaggcagccacagccagtgctggtcgccctccgcccgcgctccccc  
cccc

>chr8\_145690992\_145691192

TCGGGAGGAGCTCGGGGACCAGAAAACGCTCTGTTTGGGTGGGTGCGTGCGTGGGCATAGTGTT  
TGGAAGGAGCGTGATGAGGGGAGAAgggccggggcggggctgagggggcggggctgggggggg  
ctgagggggcggggggctgaggcggggTGAGGGAGATAAGGTTTAGGCGGGGCTGAGAGCGG  
GGGTC

>chr1\_113067277\_113067477

GGGTTGGGCATCTTTGAAGCAATGTTGGATAACAAGAAAGAGATGCTTCCTTTTCACTCTTTGC  
CCTCCCTGTCAGCCTGAGCACAACCATGAGGTTACACACACACACAGAGGTGTACATATACAG  
ACACATAGAGAACTTCTCTCAGGCTGCATAGGAGTTCTGCTCATCCTCCTCTCCCCAACAATTAA  
AAAAA

>chr14\_92803247\_92803447

GCATCACCTCCCGTACCTGGAGGAACGCTTGCTAGCAACCACTGTGTCTTGCTCATTGGCTGTCC  
AAGGGGAAAGAGAAAATAAACACCTCCTAAGATTACCAGGTACAATAGTAAGTAATTAGGCTTTG  
GGGATTTATCTAGGAGCCAGTGCTCAACTAGGGCTAGGGCTGGATCAGATTACTTGGATTTTTTT

TTTTA

>chr12\_119712417\_119712617

gaaagagcacactgtaccacacgcccactggggcttcgggagctataaacattcaaccctagatg  
ctgctgtggggctcggagcccgcgctccccacgacctgctcatctgcatgctccctctagggggtt  
aagctgtggggcactgaagaagagagccacacccccatcgcacacccccgagaggggggataagggg  
at

>chr1\_65862012\_65862212

tctgctcaaaatgcctccccattttactcagcatgaaaaccaaagtccttgaaatggcctgtgta  
gcctctgtatgctctagcatctcagtgcccgtgacctcatttcccattctttcccactttactct  
ctgcattccagctgtactggcctctttgctgttgactggctggttccctctgcctcatactcttc  
cccag

>chr8\_17770720\_17770920

taattataggttgatgggtgccttctgtccatctgggtactaaacagtgtaaaattgtaacactc  
tgataaacttcagatgccatgcctattccaattaaacccatagaagctctctgtttgggccatgt  
ttttggccactgatccagggtgtaacagaaatattagcgctgtatcgacaagtccttcaaaga  
gtttt

>chr11\_113755190\_113755390

cccaagagacggaggttgcaagtgcagcaagattgcatcattgcattccagcctgggaaacagagc  
gagactccTGGGGGTGGCACTGCAGCTGAGTTGACAAAGATAGGGAAAGCTGAGGGGAAAAATGG  
GAGTTTTAGCACTGCTaagtttagcttaaagctgcctccttacatactttaagttcagcccaag  
gtttc

>chr17\_75966005\_75966205

ACTAGAAATGCTTTAGTTAATGGGGTAAGCTAGAAGTAAGCTGCCTTTGATAACTCATGTAAGAGC  
AGCATATGAATGGATGATAACTGTCTTTCTTCCATTTAATTCAGCTACTTCCATATCAATCTCAA  
ATCTCAGTTGGAAAGCAATTTCCCTCACTTGACCCATTTTTCTTCTGCATTATATCTTTCTTCTG  
GTTCT

>chr15\_68585746\_68585946

ACACTGCTTATTTATAAAATGAGAATAATGATTATATGTACATATTCAGACATCAAAAATTTAATG  
ACATTCTATTTTGAGAAGGGAAGACAATGCTGAAGAAAGTAAACTGTTGATTGAAATGCTGACA  
GGGTGGAGAACGAATTTGAAGACAGTGAATAAACTATGAACTATGCTAATGGTAATTAGATTTT  
TTGTT

>chr3\_75683510\_75683710

CTGACTGGGGCTTCTGCCTGGGGTTTTGCAAAGAGCTACTTATGAATATAGTCTCTCCAGATTCC  
TTGTTTCAAAGGAAGTGAGCATGAGCTAGCAAGTGTAGCAACCCACAGCTGATAAAACAATTTG  
TCTTGGTTTTAAACCATCACATCTTCATTTACATTGGAATAAAGTAAGTGAACCTGCTACCCC  
AGCCT

>chr9\_72437380\_72437580

AAACTACACTGGGAAACAGAACATCCTCTTTTAGCCTCATATAGGGCTTACCTCATAGCTCTCAA  
GCAAAACACTTAGCTCTTCTGTGACTCTGTTACCCACAGAGATTTGAGTCATAACCATAAATCAC  
CACTAGAAGTTATTGTTAAAGAGAAAGACTTTTTGCAAAGGACAGTGCTTCTGCTCTCTGCTGC  
ACCAC

>chr1\_4131140\_4131340

ctggatTTTgatgaccttgatagttgTTTggcatactggccagatTTTTgtagaatttccgtca  
atgagggTTTTgtctgatgTTTTctcatgattagactggcgctatgtagTTTTggaaggaagact

gcaggggtgaagtgcccttctcattgcattgcatccaggatgcctattctcaacatgcctcatta  
ctact

>chr16\_22627899\_22628099

ctataaaatggggactaaagtcctggttgagacatacaacgaatggtaacagagtaagagtcattc  
ccctgagcctagtgagcagtcattgctttagctggaattgagacacacaaaggagtcagacacat  
gatccaaggtcactttaaaggagggccccaatcccatgctcctgtttctaaatgcccaattagtgaa  
atttc

>chr4\_25216902\_25217102

tccaggtgcatgatacaagatgtcagtgatctaccattctggggctctgaaggatggtggcctc  
ttctcacagctccacttgacagtgccctaattggggactctgtgggggctccaacctcacatttcc  
cctctgattgccctaggagaggtctccgtgagagctccattcctgcagcagacttttgctag  
acatt

>chr6\_106901707\_106901907

GAGGCCAGTTGGTATACCTGGGAGAGGCGGAGGCTTGAAGCCGCAGATGAACTGGGATCCCAGTG  
TAGGGATGGAGCCGAGCAGGGAGAAGAAGGGCAGGAACCTGAGAGAGCAAGGAGAGGCAGAGTG  
TGGTTCAGGCGACCCTGTCTCTAAGTGTCACTGGAATGGGGTCAGCCAGGCGCTGTCTCTACTCT  
CTACT

>chr22\_48583336\_48583536

GAGGCCTGTCTCCTTGGCAGTGCTATTTTAGTCCTTGTAACACAGCCACCAGGGAACAAAGGCC  
ATCAGAGCGCTCAGCCTGGCCCCACGAAACCTCTCCAGGAGGCCATTCTGCCTGCTCACTCCAA  
GGGCTCTGCCTTCAGGTCTGCCGCTGTGCCGCCCCCTGCCGCTCCTCCTGTGCTTGAAATCTC  
TGTTT

>chr17\_9124875\_9125075

tggtcttctgtgtctgcatcatactgcggggatttgaccggaGTCCACGTGGCTCAAAGGGAAGC  
TCTCTGGGCATCAGACAAGGGCTGGGAGCTCCCCGGTGCATTTCCAGTGTTCCGCCAGGCTGTAG  
CGGGGCCGGGAGTCTGCGCTGTAAACGGCTCACCACTCATTTCCATGCACCGGAAGTTCCGCTGC  
CCAGA

>chr2\_8364749\_8364949

GTGTCCTGTGTGACACCTGTGTGAGTGTCTAAACCCCGCCATCCCTGCTACGCCTGCCTTCAGT  
TCtctgttccctctccggatggtaagctctgtgagggcaggtgtattagttccccagaaaagcag  
ggcaaataggatgggagggagagagaggggaaagaaaagagagagagagagagaggttttaaggaat  
tggt

>chrX\_108427544\_108427744

aaaactagtttttatctcatgttatttccccgtaaccatttttgcagcatgtgaatgtagaca  
ttctttcaatcacctattccattgccccagaaattgctagctaggaaacctgaatttgactt  
tcaaagggatgccttcccagatgaaacaagttaataatttGtagaactcagatctaaactgt  
tattt

>chr7\_114465164\_114465364

GTCTACCTTGAGGAAGTCTGGGATCAGTTTACAGAGTAGGCAGAGAAAATGAACATGAAGGGATG  
AACTTGTATCTAAACAGGTTGTTCTGACCCTGTGAGCTCTGGAGCACCTTGGATTTTGCAGTTCT  
AATGCTTGTCCCACTAGTTTTTGTGTAGTATTCTGAAGCATTGGCTCTACTTGTAACACaata  
aataa

>chr2\_178012354\_178012554

AGCAAAGATATTTTTAAGAAATACCTCTGTGACTACTACACAATTTCCATATACTCCAAGCTACA

TTTGTGCTAAAGATGTTTTTGTGGACCATCGCGTATCCCTGAAGAGATAAACCTGGGGAGATTT  
TTAGAATTCATACTGAACCCCTCCCATTATTATGATAGCAGAGGATGGAAATGGGAATAAGAA  
TGCTG

>chr2\_122444130\_122444330

gaaatgtagcaggacgagccacagacgaaactcctcagacaccgaattaaagaaggaagaggtt  
ttattcggccgggagcatcagcagactcatgtcttaagagccgagctctccgaaaaagaaattct  
tggccttttttaaaggcttacaactttaaggggtccatgtgaaagggctcgtgataaatcgagcaag  
cgtgg

>chr2\_21512295\_21512495

TGGGCATGTCCCAGTTACCCCTTGGGGACTTTCTTAATGTTATCATGGCAACATACAATTAAGTC  
AGATTACATTTTTTATATGCAGGGAGAGGTGCTAAGATACTATTCTAAATTATTCATCAGTTCAC  
TTTTCACAAAACAATCCCAGATATGACTTTAAGATGTGCAATATTAATAAAAAAAAAAACAGATA  
ATTTC

>chr13\_60118999\_60119199

gctatcagagagtcaggaagttgcaagaacttcagaaaatgtcagagatgactatagctatctga  
agcatcatagcagaggatttgcaaagaaacaccctgaggctgctggaaaatttcatTTTTgtctga  
aatctgcaaaattgcctactgctgctaaaggcaataatatagtttgtgcctttcttatgccttcc  
aatc

>chr1\_117492077\_117492277

AAAACCTCTGGCTACTATTACTGCCACGTGTCCCTGTGGGCACCCGGACACAACAGGAGCTGGCAC  
AAAGTGGCAGAGGCCGTGTCTTCCCCAGCTGGTGTGGGTGTGACCTGGCTAGGTGAGTGGTTTTGG  
AGAATGACTCTTAACCTCTTCAGCTTAACCCCTCCTCGGAGTTATCTGAAGGAGTTATCTCAGGA  
GGCTC

>chr3\_20435996\_20436196

tcaccacccctgtgctccctcccatgaggggtggagcatggtggacctaagcaaacagtgtttg  
ctcctgacagcaggtttctgcacttctcactgtagttcttgcactcgttcccttttgtgaagga  
ttgagcagggcaggctgagtacatggggcaccgctgtcatgaatcccacaaaggggtcaagaaa  
tatcc

>chr7\_121128164\_121128364

ccagtagaagaagtgaccctcaaaattatggtttacaactgcattgggcattaaccagtttcgca  
tttaaccagcaatgttatcctcctgttaatatctagcttttcaaatgatctttgcaccggctcat  
gacatctgactttgacatgtattcattttctgtttccataagtacataattttgcctttgtgaaa  
tgatt

>chr17\_14293075\_14293275

TGCTCTCCCCCTCCCCAACGCATTACAGCCATCCCCTTCTCTCCTCTCAAGTATGTGACGAGT  
GACTGGCCTCCCATGTTTATAAGGCTGCTCTGCAATGCGATTGCTCCTCCAGGACTTTATTAATG  
CCATTTACGATTCCCGTAATAACTAAACCACACTGTTCTCAAACACCAGGCCTTGGAGAAGTCA  
TTACC

>chr1\_241800377\_241800577

GAAGAGCATACTCACCTGAAAGTCTTTAGGCTAAAGCAACAATACTGCTAAACTTTCTAATATTC  
ATCATTGCACAGTTTTGAGCTCTGGTTTTCACTACTGTTAAACCTACTGAAATATAAATCAGTAC  
AAGCTGTACCTGTCTAGCCCAAGATGACTAATAATCCTGGATACTGGAAAAACAAGCCATTCAAT  
TGGAA

>chr2\_171537154\_171537354

GTAATAGGTTGCAAATGAGTTTGGTTGAAATGTGAGAATAGCTTTGTAAGTAAAAACAGAAGTA  
ATACCAGCAATGTGGAGAAGCTCACATAAGAAGCTCAGACATTAGCAATAGCAAAATCAGAGCGT  
GAAATTCAGATTAGCCCTCCCCAGGCTGTGAGAGGAAGGGGGTATTGCAAGACTTGGCATGGCTA  
AAGGT

>chr20\_21919200\_21919400

acctttggcataactggtgactaacagagaactgaaaggaaatgtaactatctgaccatggttggc  
tcatccagtgaactaatatgaataagagaggacatggtaggtttcccttggttcatgtttttt  
agaatgccgttgcccttcttctgtgtttggagtaagttccggtttgatgaaaagggtggcttct  
acagg

>chr7\_41995675\_41995875

ATCCCCTGCCAGCTGGCTGCCTCCCTTTCCCTCTGGGAACTCAGTGAATCACACCTCCGCAGCGC  
TTTGGCTCTTGCAAGCCCTGAAGGGCTGGAGGCTTGTGCCTGCCAGCTCCGAGGAGCTGCAGCCC  
AACTTCTGAGCATGGATCATGTCTGGGACCCTGGAATTTCTGAGCACAGGAGGCTTTCCAGCTGCA  
GGGA

>chr18\_3048200\_3048400

ATTGCCCTCCGTCCTCTCCCTCCCGTCCCTCTTGCTCTGTTGGAGTCTAAAGTAGAAGCATAGG  
AAGTGGGCTAGAAGGCAGCACATCCAGGGCCGTCTGCGACTTCTCTGCATGCAGAGACAGATGG  
CAGTCTCTGCAATTACTCCCCATCATTTCCCTCCAGCGATGCTCCAGTCAGACTCCAGGAAGATG  
CCAGA

>chr11\_8890824\_8891024

CCTTCTGGCCCAATTAGGGGATAACATTTCCCATACATACTTGAACAATTTTTCTTCCCCCTA  
TCTTGGGGAGTTTTTCCAAAGGTAATATTTGCCAGATAGCctgggcccagtggtcacgcctgta  
attccagcactttgggaggcccaggcggttgatcacctcaaatcaggactttgagaccagcctg  
gcaa

>chr12\_50275933\_50276133

CTGTGTCCAGCTCTGCTCAGCTGCAGGGCTGGGAGTGGCCCCACTGTGCTGAGAATCCCCAAA  
GGCTACGGTGGGAGAGGGCAGGATGGGCAGACGAGAGACCAGGGGGTGCTGGGTGCTAGTTATGG  
GATAGGCTGGAGCTAGGGGACCACAGAGTCCGCAGGCCTGAGGGTCAGGACGAGGTCAGCATGTT  
TCTGA

>chr5\_49845643\_49845843

catattatgaagttctggtttggtatgatgaagatgactggttggctcactctatcattatga  
agtatttccctttgtcacttttaatgtATTCCATCCCTGACTTCACCAATGATTCCAAGTCTGT  
ATACAGGGTTTGGATTCTTGGCTCCTCTTTCTATGCAGGTGCTGAGGCCTTAGCCACCATGAATT  
TGCTA

>chr2\_169391154\_169391354

cagtaggatcactcctgtatagggttcctgacaaccctggtggacggtctcaccctggtgggtg  
gcatggggaacaacaggaccctttaaacaagcactttgtcccttggtggaaggggtgtgcctca  
ctgtggggaacacagtcactctgggctgccagattcctcagaactaccaggaggaaaggctaag  
tctgc

>chr11\_76158552\_76158752

ATGTAAGCCATGCTCACTTTTTCAAATTATATTTTACTATCAATAATAAAACACATTTTATGCTT  
GTAATTTATTATTTAGTGTTTCTTTCCCTTACAGcagcctttctcaaccagcattgagggaaag  
aattaaaccctaagtctaaggtatccattgtatgtaaaagaactaacttcgccctgtgcatctaga  
gtgct

>chr4\_92191177\_92191377  
attatacttttgccgcagagatattaatgtcttttgattacaccagctccagatgtagctaagggt  
gctttttgtaaattctgaataattctgaattctgaaaaatcacttggcctcaagcttttgataa  
agagttACTTAAGAATTTTCTTATGTTTATATTTCCATTCCATGTCTAACACTGTTTTGCTTTTT  
GATGT

>chr4\_180067206\_180067406  
agcaatggaatgctatgcaccctcaaaaaaagaagaaatcctgtaatttgtgacaacatgatta  
aacctgaaagacattataactaagtgaagacaggagaaataataaaagttcaagagactcagtgt  
caacatagtgactaaatcaagtgaattaacatatgtattacctcacatacttatcattgtttgt  
ggtga

>chr4\_184722606\_184722806  
ATGGGACATGCCATCTTTGGGGTATTCTGACATAAGAAATTGAGAGTGTGCTAAATGCTTTGAG  
GACTCTTTGTTTTGAGTGAACGAGAAGCAGTTACTTCTGTCTTGTGAGCTGGTAGGGGAGGTTTC  
CCAGGTATGAGGCTTGAACCTTGATCTTGTGCAGATGGAGATGGGGGTGGGGCGGGAGTTCCTGCA  
GAGCA

>chr6\_20881421\_20881621  
tggacccatcctcagagtctgcgattcagtaggtctggagtagagcttgagaatttgcatttct  
gtcaggtccaagataatgatggtgctggtctgggactacactccaagaaactgAAAACAG  
ACTTTGCTTTCACCTTTGATTTATGAATCCCTCTTTGCCATATATAATCATAGCATATATTTGT  
ATATG

>chr6\_108026507\_108026707  
GCAGAGCGTTGCCATCAATCTCCTGGTGGGATAGGATCAGAAGAAAGATAAACCCAGAAGATGGT  
CAGAGTCATCGAACAGTGGCTAAGGTTAAGGTGTGGTCAAGGGGTGTGCTCAGGGCATATGGATT  
GATTTAGGCAGCATATTCTCTTGGTCTGGGGCAAGGTCTTTTAAAATATTAAGCAAACAATA  
CTGTG

>chr10\_99628210\_99628410  
CAGCCTGTTCCAGAGAGGGGCTCATCAGACTGTGGGACAACGGCTCCAGCCTCTTAGGTGGG  
GGCTGGGCAGTCCCCTCTGGGTGGTTCTCATGTTTGTGTCACGCGCTAAGGGCTGCAGTGAG  
CTGTGTGCAGCCTGGACTCACTCCCTCTGCTGGAACCTGGGCCGTGTGTGGGTTGCCACAAGTGA  
GCGTG

>chr11\_95026552\_95026752  
AGGAGTATGGGAGAGGAACTGATAGACAGTTGGGGCCAGtttttttggtttttttttttttttt  
gagagagagttttgctcttgttgcttaggctggagtgcaatggtgccatctcaactcacggcaac  
ctccgcctcccgggttcaagcaattctctcgcctcagcctccctggtaccttgattacaggtat  
gcgcc

>chr16\_4238999\_4239199  
GGAGGAGGAGAACACTTTCTGGTGAAGCCAAGGGGAGGTGGCAGCCTTACCATTGAGGAAACCTT  
TGTGCCCTCCTCCACTGGAGCCCTCAGTTATCTAAGGCAGCTGCGTGGATGCCAGGGGAATGAG  
GCATTGAGGTGCTGAGGAGAGAGCAGTTCTTTAAGTTTCAGAGGACACCACGCCTTCTGGGCGG  
CTGAG

>chr16\_11759699\_11759899  
cacaacgccacggccagctaacttttcttttttagagataggagtctcactacatttccagggt  
gttctcaaactcctgagctcaagccatccccctgccttggcattcccccagggtgctgagattaca  
ggtgtgagccaccgcacccggcctcatctcatttctcagacgaaaaactgaggcacagaaacg



ttcgg  
>chr16\_49573299\_49573499  
CTCATCGGCTGCATTACAGCTATAGCTTTCTGGTGgcacagcacatgaacagaagtgcagcctcgg  
agtcagattgcacaggttcaaactctcccaccaccatccactagcagtgggatcctggaaccccac  
ctccccgggccaatgttccccaccatgtaaaatgagaatgattgtagtgcctacataactgt  
tggga  
>chr16\_61973699\_61973899  
ATTGTAAATAGCTGTCACTAACGGACTATCTGCCATTTccagggacataagcattatattgtcaca  
tggcacagataagaagctgagactcaaagaatgtaagaaaccatactagagcacatagactcca  
agtgaaggggacaggatthtagctagaatacctggctcacaaaacATCAAACCACTTCCAACAC  
ATCTC  
>chr17\_7614475\_7614675  
AAGATGGTTGCTTTGTCCACCAGAGGTCAAGTTCACCTCTCTGGTGCTGTAGTTCCCAGCTCCTT  
CCTGATTTTTCTAATCGCTCCTTCTGGGGAACAGGAAGTTGATATTGCCATGGTGGCGGGGTATG  
CCGTCACCTCAGTAGTTTTACTGTAAAAGGGAAATTTGAACAACAAAAACCaaaaaaaataaaaa  
taaaa  
>chr19\_55652188\_55652388  
acaaAATGGGCATCCGGCTGAAAGAAGTAACATTTGGGCTCTCAGGGCAGGGGAGGCACCCACCGC  
CAGCTTAGCCTGACGTTTCGCGTTCCTTCTCAGTTCTGAAGCGCTGTTGCTCGGCTCTCTTGACC  
GGCGCCGCTCCTGGGAAACGGAGAAGCATAAGGGGGTGCAGGGACGTACCCCCAGTCTTCTTCC  
CCAGA  
>chr22\_17943000\_17943200  
gtgtcctgaaagccagagaagaaattatthtaagatagaatcaacttaaatgctgctthtaact  
tagtatgatggaggctgagaaccatttgttaatttggcTTGGTTGCAGTACAATGGTGGGAATG  
AAAATTTGTTTGCATCACTAATACTGGCATTAAAGATTTTGTATAGAAGTTTTTGTACCATCTCT  
GAGGC  
>chr22\_40640254\_40640454  
GCGTGTTCACACCTAGACAGAGGCACACAGTCTGACTCCAAAGAAATCCAGCATAAGACCTAAG  
GAAATTCAGTAAAATCTCCTCCTGGTTGTGTGGATTTTGCATATTAGGCTTTTATATCTTTAT  
ACCCAGAGGTGCAGAAGGAGAAAGGCTAATATTTGAATGCAGACAAAGTCAGTGACAACATGTAG  
GTAAA  
>chr1\_10899813\_10900013  
TCAGGCCCGTAGGGATTGCTCAGTGGCACAGAGCAGGTAACAGTCCCCAGGCCTCGCCTAACACA  
GAAAGTGCTCAGCCAGCTCTTTCGTCAATAGATGAGCAAAGCGTGGATGGGGCAAAATGAGCGTC  
GGCTGCCCAGTCTGCTCAGATCTTCAGGTGGGGTCTCAGTGATAGGGTCTCAGCACTGCTGAGA  
TGGCA  
>chr1\_108067277\_108067477  
CGCTCTGGCAGGAAACCGTTCCTTCCTCATGTGCACAGGGACCACTTCCCAGTCCACTCTTGTTA  
ACGTTATAACAAAAGCTTATGTGTGACCACTTTTAAGGGAGGGGACATATTCTTTCAGGACAGTG  
ATTTGTTAGGTATGAAATAAATAATTATTGATCAACTGCTTAACCACCCAAGTAAGACATTTGTA  
ATCTT  
>chr5\_68090044\_68090244  
ATCACAAATTTGCAGTTCATGTTGGAAAATGAATTTCACTTACCAAGGAGAAGTGCAAAATTTGGTA  
TTATTTAAGATAGTTCTACCCCTCACAAAGCGGGGAGTCAACCTCACTCCCCACAGCCAGGACAG

CCAATGTGCCTTTAGATTTAGAAAATGGGCTGGTCTGTACACGTGCACTTTCTTTCTCTTGTTCAG  
CAAAG

>chr6\_2908401\_2908601

AGGAGATGAGCCTTGAAACGTATGTTGAGGTCAAATCGAAAAGGCCTGTATGCAAACCTTTGAAG  
CCCAGAGCTGACTCCCTTCCATGATCACCTGGTTTCAGCTATAATGGGCTTGGCACTAGCCTCCC  
ATCCTCTGCCCATCTTCTTGTCTCAAATAATCTTGGTCTACAGAAGAGGATGTAGAGAGGAGA  
AGGGG

>chr6\_71469479\_71469679

ATAGTGAATTGATTGGTGTCTATATTGGTAAATCCTTGACGTTTCGACACAGTGAAGATATAATAC  
TGGAAACAACAGCTGtaataactttactgcttaataagtgtttgccctatgccaaagccctgacca  
tggcattttatgtacattatcttttttatttctcaaaataactcggtgacatagagcataatatt  
ttctt

>chr6\_71707879\_71708079

gagccaagtggctctggctcagcaggtcccacccccatggagcccagcaaattaagatccactggc  
ttgaaattcttgctgccagcacagcagcggctctgagattgatcttcacagcagcggctctgagatt  
gacctgggatgctcagacttgggtgggggaaggggtgtccatcactggtgaggcttgagtaggcag  
tttta

>chr6\_151936707\_151936907

AGGCTAAGGAGAATAAAGAAAGGGCCAGAAACATGATAGAAGTGGTAACCAGTGAAATGAAGACA  
CTAAAAAATCTCTGGAAGAAGCAGAAAAGAGAGAAAAGCAGGTGGGTCTAAATCTGGTGATGAA  
ACCTTGTTTAGGAAATGACAGGACAATTCAAGAGCTTGATATTAATACTTATTCATGCATTTCTT  
TTTAA

>chr6\_157193708\_157193908

cctcccaaagtgctgagccacctcccaaggtgagaccaccactcctggccTAACCCATCGGTTT  
TCAGTCTGTTTGGTTTATTGGCTTGCTAAGCTTTCTTTAATAATTTCTATTTCAGTAGGACAGAGC  
CTTCCAGGGACCAGAAAAGGGGAAATAGGTATCTGAGAAAATAACAAGGTCTCTTCAGCACCTT  
TTCCA

>chr7\_30489875\_30490075

AGAGTCACTGGCTGAGAGTACAGAGAACAGACTCCAGGTTTTCCAATCCCAGGCTAGGGCAGCC  
TTTCAGCCCCCTGCACCCCATGTCCCCATGCAATTATTTACTCTGACACTGGTGTGACAGGCAC  
TGGGAGTCAGTTCCAAATCCCTACTGCTTTTTAGAAAATGCATGAGTCAAGTAATGGCAAATTTAA  
CCCCC

>chr7\_139672531\_139672731

GTTATTAACACACCACTCATTTTGGGAGGGGAATATCATCAAGTcccagccaggatgtaaacc  
acgactaggaagcctcgtccgctgggtaccttggtaggtcccagggccgagcacagtgcctggca  
cgtgagaaataggtggtgagaaaagttatttCACTCTTCCTTTTCTAACTGGAAACCAACTCCAA  
GCACA

>chr8\_144368825\_144369025

GTGGTGTCTGTCCACCTTCGGGGTGTCCCTGGTGGCCAGCGCAGCAGGAGTGAATGTCCTGAG  
CCTGAGCCAGTTCTCCTTGACTGCACAGCACCAAGGTGCCAGTCAGTGCTGGTCAGGCTGGCCGC  
TAGGTCTTGGTGCACCCGCCACTTCCTACCACCCTTGCAATTTCTCCTCTTAGGGCCACTGGTGT  
GTCTC

>chr9\_117954379\_117954579

CACAGAGATGTTGCATATTTGAAGCCAGCTATGCATTTGAATGTTCTCTTTGGAAGTGTATCCG

TTATCATTTGTGAGTTTGGAGCAATGCCACTTGCCTGGATTTCTTCCTTTGTTTCCTACCTGGCAA  
ACCTAATGGTATTCCCTAAACTCCAAATATCTGCACATCATTTCCCTGTTTATAACATTTTCATTC  
TATCC

>chr10\_88183820\_88184020

taccttagcccaaactcctcagagaaatgcatttgaactttctttccatctcctcgttcggcaac  
cctataattaacctctttatctgctgcaaccagagaaatattaacattctcagggattaactt  
gctgggtacatcaggtaacagacctgttaacgggtttcaatcccactggtgggtatctacccaaa  
gaaag

>chr11\_116331190\_116331390

ccttgggagtgcccttggggctgttccagcaggggaattccaagtgccaggtaggaggtaggccag  
agcggggcctctaaagcacaaccccagagcaaggaccctgttacctaggtcttcaagtggtaGCA  
GCCTAAAGAGCAGGTGTTTACTGGTGTTCATACAGCACTGGCAAATAGGGAGAGACACAGACTGA  
CAGAG

>chr11\_133584190\_133584390

GCACAGGTGTCCATCATTTGGCCACATAACTAGCGCTGCCATtggttgcacactcatctctcctgc  
agtgcaggagcatctcaaggcagtgagctgccttactcatggctccaccacagcaccagcaca  
gacctggcaaggggtaggctcacagctgaatTTGAAATGCCGATGCCCTTTCGTCATGGCTTTG  
TATTC

>chr12\_118553617\_118553817

agttttagaacaggaatgcaaggaaataaagtacacgtggaagagggccagtagggaccttgaga  
gattcaagtgcattggtttgaccttggacttgggttttatatggtggcagctctgcatgtacaatg  
gcctgccagcacttgggaggggctgcatgtgagtggtttactgaagctatatgtgtgctcactt  
gaggt

>chr13\_94212999\_94213199

cagagcgagactccgcctccaaaaaaaaaaaaaaaaaagaaTTTTGCTCAATATCCAGCATAACCCT  
GTTAATTTTGTGGGAACATAATAAAAGCTACTTTGATAACAAAGCAGAAAAATCAGCTGTTTGTG  
TTCTTGCGCATGTCAAACCTTAAATTTGGCTGTGTTTTCTGCTCTCTTCCCCAGTAACTTCATTT  
TTAAG

>chr13\_111179799\_111179999

AGGAGTCAGAAGAATGTGCCCTGCTGCCAGTCTGAGGGTCAAAGTGCAGAGCTACCCGGGTCCAC  
CTCCCTCTTCTGGGAAAAGCCAGCCTGGGAATGCTGTTGTTGGGCGACAGAGCCACCCTGTTGG  
CAAGCAGCTTGTGCTCTGGAATTCAGCACCTGAAGGGCAACATTCCTCCCTTCCGCACGCCTACC  
AGGGG

>chr18\_53019402\_53019602

TTCACAAGGCAGTCACCAACTAAAACAAAGGGTCCTTGTTTTAAATTAAGACAGTCTTTTTGATT  
CCTAAATAGCTCAACAAAGTGGCATGTCTTCTAGTGAAAGCAGTTGGTCAAATATGACCCATAAG  
CTGGAAAATCAAAAATTCAAACCTCCCTTTCCACCGCCATATAGCTAAATATCATAAAGAGAAC  
CTCTC

>chr19\_51556588\_51556788

gcaaccagagtgataatccgatttcagatattcctcccctggtgacactctccaggagctcccc  
actacaatgggagaaagaccacctccctgactacagctaaaaagattccgaatatTTGGTCCAG  
ccaaatcctccagctctcattccctaccagtcactcgttcatcattactgtacagtcagtgctggc  
ctgcc

>chr22\_35159600\_35159800

ccccttgtaaggaagagcatgtctatgtctctatacagttccccatttcacccagaatcaaagcc  
acagcctggaagtgggtgcagagagcctcacaggctgtgccacccccatttcctcttaatctcct  
ctcttactctctccttcactcactctactctagccacagggagctccttgctgcgtctcaaaaca  
cacca

>chr1\_65326812\_65327012

TCTTGGCACTCAACGGTGAATGGCTAAATCGGCATTATTCCTGCTTAGGAGAAAAGAAACAGAGG  
CAGTGTGGTTCATCTCATAGCAGACTTGCTCTAGAAGGTGAAACTCCCGGATTTAATCTAGGAA  
TAATCCCAGGCCAGTGAAGAGTTTGCTAGATTAAGCCTAGGGAGCTCTGAGAGTTGGAGAGAGC  
AGAGT

>chr1\_91604012\_91604212

AGCAGGGTCTTAGGCTGGGATTGAAACAAGGGTGGCCACTGGACCAGACTAGTTTGGGGCAGCCA  
GCAAAGGCAGCTAATCCTGGGATTGGACACATGTATGAGATGGTCCTATCTGAGGAGCTCTGCC  
GGGAGACTACTTCAAGCAAGTTTGAATGAGGAGCCAGAGGAAGAGCCAGCTGTCAGTAGGGAGAA  
GAAAG

>chr1\_205407777\_205407977

CCAGCTGCAGTGCTGGCCCCAACCTCAGCCCTGGGTGAAGAAGGGGCTGCCGGCTTGGAGGCAGA  
GGACAACCTGGACCTCCACTCAGAACACTTTGACCTTGGGACCCACCCATGTTCCCAAAGCCAGG  
GCTCAAGATATCTAGTATCCCTCTGGAGCCAAGGGAGTTCTCCCGGGGAGGAAGCTCTCTGGAT  
GGGCT

>chr2\_1771393\_1771593

GGCACGTGCCGCACCGGATCCCCAGAGTCCGAGCCCGCCCCACCCCCACGCCCTCCGTGGGGCT  
GGTGC GGCCCTCCAGGTGCTGGTCCCCAGCACTTACCACCTAAGCCGCCGACCTGCTTCCTTCT  
TATTCACCTGGCCCTCCCTCTGCCTCTCCACACCACCAGGCTTGAGTTAACTCACACCTCCTTC  
CTCTG

>chr2\_97612273\_97612473

GTGGCCACAGGAGATGCTCTGGAGTTAGAAGAGCCAGAGCTAAGCTGACAGGGGACTCAAGAGCT  
TGTTTCTGATCCTTCTAATGGGGAGCGCATCAGAGACAACGTGGCAAGAAGCAAAGGAGAGTGG  
GGCATCCCCTCTGCCTCAGCGGAGGAGACATAACCCTGCAGGGAGCAGGACAAGGGAAGCCTC  
TGTTT

>chr2\_189318555\_189318755

AAGGTTTCCAGCAGGAAAAGATATTCTAGGTTACATGTGTGAATTTTGCTAGTTCTGTAGATGCT  
AATGCTTCAGGTGCTTTTGGCCCTTCTTTCTTTTCCACTGCACCTTTGGCTCCCCAGCCTGGACCT  
GGTCACTCCATCTGGTAATGAtgcagggtttttctcagccactttgccacctggggacccgtag  
gctgg

>chr4\_80475976\_80476176

gagttaagagtggcagtttggggatagcaccaggagatatcagctgtgatggcttgaaaaacag  
tgtaaactggcagtgtaaacaagagcagggcatgtatgagtagttgagaatggatgaataggagta  
tgactagacagaagatagtagggatgacaagttttctggggcacagtccaagtTggtctggtgtc  
tgga

>chr4\_120518752\_120518952

ttacatgcttaataataatagcatcactgctccaaaaactacgcagttggaattcccttcaga  
gaatatggaatatccacactggaagctcatcttttgatgagctttgaaggcatttcttttta  
aaaaataaaaaataaattagtcacagtaaagctgtgaaatgaagtgattacactagattccatca  
attgg

>chr5\_67486644\_67486844  
CCCTCCACCCACACACATTCACTTACCCTACTTATATGTGAATATTGCAATTAAGATGGCAAAAAG  
GCAGGCAGCAGCGCAGCACATGTGGCCATGATGAATGCAAATGTTAAAGATTAACCTTTTTTTAA  
AAAAAGCAGGTTTACTTAATTTTGAAAAGTATCATATTTGCAAAGCTAATTTAGTATTTTAAATT  
CCCAC

>chr5\_175302794\_175302994  
GGATCAGGCAGCAGGATTTTTGGGCAGACTCGGGAATTCAGATAAAGAATCCCAGCAGGCTGAA  
GAAGAGCTACTTAGAGCCACAGGGATGTAAGCATTGAGAAGACTCAGTGGTGAGTAGAGGTA  
TGCAAACCTGGTGGAGGGGTGGCAGTGGTAAACAATGTCTGATGAATGCATGCTGGCAAGCAGAGG  
TGGCC

>chr6\_160663010\_160663210  
TTTACTTCCATCACCTGGCTTCCCTAAGCTGTTTCTATGGACCTGTTTGTGCTGTTCCACAACAA  
TCTCCCCTGTAGCCATTGGGTAATCCCTGTCTTGCAATTCATTTTCTGTTCTCACCATGGCCTC  
TGTATTTTACCCAGCCTGTAAGTGTGAGAGGTGAACTGCTGGGCCTGGCTGGACCTTTACGTGT  
TCTCA

>chr7\_43641075\_43641275  
TAAGGTAGAATTGGAAATTGATCCAGAAAAGACCACCTGAAATTTCTGTCTCCAAAATCTCCTCA  
TTCTTGCAAACCTGCTCTTCAGCCTTTCATCCTGGGACCCATTTTCAGTTCTTCCAGTCTTCACC  
CGGCTTCTGACTTTTTTCTTCCCTTTTCTTCTCTCTCTTTAGTAGTTAATTCATTCCTCT  
CTTAC

>chr7\_148999267\_148999467  
tagactggccgtcaagagagtcagggatgagctcacaggagcatgacgcttgtgctcggctctcaa  
agaatgagtaaagtgtCTTCAGGGACTCTCCAAGGCGTGAATCCCGTCCAAAGGCCTCAGCCACCC  
ACCTCCGCCGCCACCTCTGCTACCATCCTGCCTCAAACATCATGCTCCACAGCCAGGCCTTCCCC  
TGGCT

>chr9\_10331400\_10331600  
cttccatctgaaagcccagacactgtggagcagaggcaaaccatttccccattccctgtctgaat  
tccctgattcacagTTTTTTTGTGTTTTAACTAGTCTTGAAGTGGTTAGTTAAATAGTAAGAGAT  
GGTTCATAAAGAATTTGGTGCTGAAAGTGGAGCAGTCAGAGTTGCATCTGCTTTCCTGCTCTTGT  
GTTAT

>chr9\_126126379\_126126579  
AGAGATGGCAGCTGATGAAGAGAGATTTGGGAAGCTGGTTCCATGCATCTTCTCATCGTTCCAG  
TGTCTCAGCGTCTGGGTGTATTAGTGTACATGCCAGTGCAGGTCACATTCGTCCATGTGTCTCCT  
AGTTCCAAGTTCTGTTTTGCATCTGTAAAGATCTGCCAGTACCTGGGGGTGTCTGCAGTCTGAGT  
GCATG

>chr11\_44212824\_44213024  
AAGAGGTGAGCAAGGCATTTTTGGCCAAAGGCCAGCACATTGTCAGAATAATACACACTTATTCTT  
TTGGTATCTCCTCCTACCTTTGAGTGAACAGGTTTCATCCAGTGTATTTGAAAATTGCATTGACAG  
CCAAGGTTTTGAAGGCATAGCTGCGATAGATGAGCTTTGCCTCTTCTCCAGCTCTGTTGCTGGAT  
GCCTG

>chr11\_70020952\_70021152  
AGTCCCTGTCCCATGGCAGTAAAGAAAAGAGTGCATCCCATTCCAGCAGGTACAGCTaaaaaa  
agaaaaagaaaaagaaaaagaaaaagaaaaagaaagagTGCAGCCCACACTGAGTCCTCACAAA  
GGCCTGATGCTCAGGCAGCCGACAGTACCCACCCCGCCGACCTGCCACATCACAGTGGC

GTGTG

>chr15\_60852308\_60852508

TTTTGCTCCCTATGAGATTGTATTAATTTAGATCTCTCCAGAACATTTGACTCCCTTCTTAAGG  
AGATTTATGTTGAAAATTCTCACATAGCCACAAAACGCAGTCCATTTTATATTTAAAATGTGAGTG  
TATTTCTAAAATTTTTTCTTTTGTGTTTGTGTTTCTCAAGAATGCTTTCTAAAACAACTCAT  
GTGAC

>chr15\_76400745\_76400945

ttaaagatcattcaTCCcagtgccttttcaaactgtaacgtcttataaatctcctggggatcctgt  
taagctacagattcctgattcactgggcctgggatgggtctgaggatttgcatttctaagagc  
tcccaggtgatgccagtgctgctgctggaccgcccgcactttgaaaagcaaggATCTAAGAA  
ATCAA

>chr17\_17527075\_17527275

TTaggtgggacgtgctgggggctaggccgtaggagcgggatggtgagaagaggcgatctggagg  
gatcatggaggcatgccccaggatttgcagcgcactgggcccaggggggatgaggattgcaag  
gagtggggaggactcgggtttcaggcctgagcaagtgggacaatgggggtgccaatgtgaggtgg  
tggag

>chr17\_19078607\_19078807

TCCGGGGGCCGGctctgggccttcacacatgctgttctctccacctggaacacacttcgctttct  
caaacgccacctcccattttatTTTTcagcatagcttaaaaaataaaactcctgggaaacctgcct  
ttatccagctggtaaagttctcctgtaggttcccacagcaccGCTGCCTCAGTCTCCTCCCAT  
CCTGT

>chr18\_44352602\_44352802

AGTCAGAGGTGGCGCTGTGTGAGGAGGCCCCAGGACCCTACTGGGATGACACTGGTAACTCCGAG  
GACAAGCTTGGCTAGGAGAGCAAGAGAGAGCACaggccatatggcatgaaaagaacatgtgacca  
gagacaggacctggatttttgggttcagtttactgtcagcatgctgtgtggccatgaacaagtt  
gcttt

>chr19\_28658760\_28658960

aggccattttattgtcctctctgcacctggtgcctagcacagagcccagcataTTCACATGTGC  
TGAAGAATTATCTAGCTTCTTAAGCATCATATAAAAATAAGCATTATTAGTCATAGAAAAAGTATA  
AGCTCCAATTCAGTGGTTTAGCGATGCCTATTTTCTAGGTTTCTTTTCTGATTCTTAGATGTGA  
TTGAC

>chr1\_100900612\_100900812

cctgtgtctgtggaactatccgggtgatgccatacacactaaagtttttagaggccctggtctag  
agagagagagtatggagtgagaagaattttggtctagagttgaaccttgagaaggtttgactttt  
aaagactgggaagtgaaggatgactttgcaaaggaggttgaagtagtgttttagagggtagaagg  
aaaat

>chr1\_113369877\_113370077

acagtggtactatgacaccaggaaaacttagaactttgtgtgaaatagactggccagcattagag  
gtgggttgccatcagaaggaagcctggacaggtcctttgtttcaaaggtatggcacaaggttaag  
ccagggcaccagaccagttcctgtacatagacacttgggttacagctggtttttagatgccccca  
cagtg

>chr1\_117553077\_117553277

GTGTGTGGTTTTCCCAAGGCCTTGTCCGCAGCTCTCCATAGGTTGCTAGTAGCAACAGCATTCAA  
CAAAGCTGTGAGAGTTCTCCCTGTGTTGTCTCTGCTTGCAGGCAGAACAGTAATTTGACAAGAAA

GCTGGTACCATAGGTGATAAGTCATTAAGTTAGAAATGATAATTCTCAAACCTACCATTCTCTAGC  
ATATT

>chr1\_208351977\_208352177

TGGGAACCCAATTTGGAAGGTATCGAATGAGGGACAATGTAAACACCTGTATCCAGGAGGATGCG  
AGGAGAAGAAGAGTTCCAATAACTCACCCTTAGGGGagtggtttgcaaaatgtggtactcagatc  
aacagcatcaacatcaactggaaacttacaaaatcagcatttgaaaatacaaatctcaggtc  
catct

>chr2\_125083930\_125084130

GCATTTGTGTGTGTGCCTGTGCCAACATGTGATAGTCGTGGGCAGAACTCCAAAAGTAAAGCAT  
AAAGCTTTTCTCATATGTACCCCAACTATGATTA AAAAGCCTGTGCTTGACAGAGAAAAACA  
AAATAATATTTTATTAGAAAGTAagtttattaaagcagctaagaacatggggtctggaggcagat  
tcctt

>chr3\_71095510\_71095710

GTTCTGATGAGTGTAGAACTAATTTGCTCAAAAATCAACAGATGAATGCAAAAAGAAAAAAAAAG  
GAAACTAAACAAAGTTTTCTTTTTATAAGAGAAAGTGGTTGATTTCTATCGTTTACAGAAAAAT  
AAACCTGAATTTATCCCTAGATATTA AACATGGCATTATAAAGCATTACTAAGATTTAAATA  
GCACA

>chr3\_72745110\_72745310

CTTAGAATGTTGACAATTTCTGCTAAGATTCTGGAGGCAGCAACAGAAAgttgacagtgtgagt  
tttgagatagcctgtctgcctcagctctcagccctcagcagccaggggaggggggtgggaggag  
tgggtaacttatgcctgtgcctcggtttctcatacctaaaacggagaggggcagcagaacctcc  
ctccc

>chr4\_62254805\_62255005

TGgatttgtatattagaaagataactctggaagcagcatgcatgatcatgtgactggaggcaggt  
ggattaccaggaaatatttgcaataactcaggtgaggtatgagaaagatccagtttaacacaac  
aacaatggggattgagtgggagtaacacatttaagattattagaaggcagttgataggtcttag  
tgact

>chr6\_114649907\_114650107

AATTACTACTTGTGAGTGTAAATCTATTTTAGGGAACCTACTTTGAATGATAAAAGATGGGCTTG  
ATATTGAGAGGGTGGGATAGGCAAGGTGACTGCTTACTTCCCCAGATCAGAACTCACTCTTTCT  
TATGATGAATGAGTACCTTTATTGTGATGATGTCTTATCTGAATTATTCTGTATTTCTTTAGTGC  
ATGAG

>chr6\_144258107\_144258307

GTTATTGCTCCTTCATAAAACACTGAGTAGAAAGGAGGCTTCTTAGGACAGAGGGGACTTGTTC  
TTTTTTATTTTTTAACAAAAAAGAACCTCTGAGAATCCTGTCCCCTACGATGTGGTCAAACT  
AAGCCATGGTGTGGTGTGCCATATCCATAAACTTGTGTATCTCCATACCTAACAACACTGCTGG  
GCTCA

>chr7\_25946875\_25947075

GGAAAGCCATTGCAGCTCCATCCACACACAAAGTGGGCAGTGAGCCTGCCCTGCCAAGAGGCAGC  
TGCTGTCTGTTTTGGGGAAGGCTCCCGCATCTTTGCTCAGCAGGGAGTCACCTTCTCTTTTTGC  
CTCCACTGGCCACCTCTGCAACCTGCTCACACAACCAATTGAACTTTCTGGCAAGACATGAAA  
TGTGC

>chr8\_7616790\_7616990

GGTGCAGTGTCAAAGGGGACGCGACTGGTTCCAAAGCTCGAGAAGACCATGGGGTCACTTGGGCT

ACATGAGAAAACGCCCCAGTGTGCTGGTTCATCATTCCGACTCCTGCCTGTCTCTTCCCGTCCAA  
GGAACATGGACCCTAAGTCGTGCAGGTGCGGATGACCATGGGCAGAATTAGGGGCCGTGGCACAA  
AAGTT

>chr10\_73336994\_73337194

CTGTTAGTTCAGCTCCTGCCCCCTTCTCCATCAGTGTGCAGAGAGAATGAGTAGGGGTGTGGGC  
AGAGCCATTCCAAGCAGGAATTGCCAGGCACAGTGTGTGTGGGCCATGGTTCCTAGGGCCATGG  
CGGCCCTCTGAGTTGCCACCGTCATCCCCGAGATACCTGCTTTCATGATTTATGCTTTCATCCC  
TAAAG

>chr11\_11684024\_11684224

ATGCCGTGCACCCTATATTTGCAGGTGAAAATCAGACTTGTCCCCTGCAACACTCCCAGGATTCC  
AAGGACAGAATGCCTGGAGTCAGTCGTACCAGGCTTTCTATACCCTCTAGCCTCGCCTTCCTCTT  
GCAACAAAAAGACTCACTTGAATTGATCTACACTGTTGCCTTGCAAAGTAACTAGCAGCCATA  
ATGTT

>chr11\_45394224\_45394424

gcccatgctTGCCCTGGCTCTGCCGGAAGACAGTAGGTGCTTTGCTTCTGAGAAAGGTCAGGA  
AGAGGCGTGGCTCCTCCAGCTGTACAGACGACCAGGCCAGATCCACATGGCCCCGTTTGGTGCTT  
GGATGTCTGGTAAACTGCCTGCCAAGGAGGAACGCAGGTAGGACAAGAAAAGTGTGGGTGGTGAA  
ACGCA

>chr11\_45676224\_45676424

CCTGGCCTCCCTCTACCTCTGCTTAGTAAAAATCCAAGCAAACCTTGGACACAGGAGACCACGAT  
CTATCATTTCTGTTAGAAAGCAGGCAAGTTGGTGTAGCTTTCACCTCCAGGAGAAAGCTCAGATTT  
CATTATCAGTGAACCTTGAGATGAGGGCACAGACTGGGAGCAGTGAACAGCTCTATATTGAAAAAC  
TGTA

>chr13\_74547199\_74547399

ACAGCAATATACAAAAGCAGAAATGTAAACCCATTTAGCTTTCTGAATATGTTTTGCCCCAGG  
AAATGCATAAAATAACTTTGTTATTTAACACTGCAGATGCACCTGTGGGCACCAAAGTACTCTTA  
GTTATTTAAAATAATTACCCTGTGGAGAAATCTTAAGGTCTTTAATAAATAAAAATCTGTGCAAT  
AGGGC

>chr14\_95723047\_95723247

TCTAGGCTGGGATGGGAGAGAAAATTGCCAAATGTAGGGCCCTGGTCCACATTGCACCGGGAAAAC  
AGACATGGGGAAACTGGGGATGGCAGGAGAAGAGCTGTCAGTGGACAGGGCCACTAAGCCTCCTG  
GGTCAGGGGCAGAATTGGAGCAGGAGCTTGAAGGCCCCATGCGGTGTTAGCAGATAGGGAAAAGG  
AGAGG

>chr1\_34944213\_34944413

AAGCCGCCCTacttcctgctcctttgatggtgggctgagccacgtgacttgctttaccagtggt  
gtcccactgggggactcactccacatctgagcagagcctttcaatgtgctttctggtgagctc  
tttctcccttgagcttctgccctctgccacaagaacagcatgctgcatatgtgggctgcccttc  
agctg

>chr2\_52248896\_52249096

GGAGTGGGAAGCTAGAAAGTCATGTGTCCTGATCATGCCTTTGAGCCATAATATTAGCCTTAAAC  
TGACTTGTCCCTAACATTTTGTGGTATGGGGCAATTTAGCCCTACCTTTTAAAAGCACAAATAGG  
AGAACTTCCTGTTATTTGAAACAGATGTAGTCTATCAAGCAACCAGCAATCTGTAATGTGCTAC  
AATAA

>chr2\_118607530\_118607730



GCTGATGGTTCAGTTACAGGCTCTGGGGCTAAATCCCCTGGTCCTGGCTACCCTGAACTTCACGC  
AGCTCTGAGTAGGGGAGTAAATTAGCCTGCAGGGGGAATGTGGGTAATTCTCGACCTCATTACAG  
CCCTCCTTTCCAATTTTCGCCTTCTACGAGCAGCTTAAAAATGCAGAAGAGATCAGCTGAGACACA  
CACTC

>chr2\_154260954\_154261154

aagcaagttgtatcttctgttctttgctgtagaagctttctaattCACCTAATTGTGATTTTT  
TTCAAAAGATTTTTTTTTTACTTTAGAAAAAAATCTAGAAAAGTATTTCCAATTTCTGCTA  
TTATTAAGTAAAATTAAGGTATTAGTCTACATCATTCTCTCTGATAATAAATTTGGAATCCAGG  
AAGGA

>chr2\_213617555\_213617755

cagattaagagacaaatcatcattgaatacacagtttattacagttccaaagaggaaggagcaca  
ccatgtcatgcagggccacaccagggctgatcaagagggagaaagagcaagggaaaagcatgagc  
aggagcctttattgtaggttccttggaaaaggcaaagcaaggcagagtaggcaggttaggattg  
gctaa

>chr3\_14133199\_14133399

ctcttttactaatcctcctcagcacagaccctttacgggtgtcgggctgggggacggtcaggtct  
ttcccttcccagaggccatatttcagactatcacatggggagaaaccttggacaatacctggct  
ttcctaggcagaggtccctgcggccttccgcagtgtttggtgccttgggtacttgagattagga  
gggt

>chr4\_79843376\_79843576

ATCCTCATGTTTACAACGCAGGTTTTCCCTTGTATTTCCATTCTTATTTAAAGCTCAGTGGTGAA  
AAACCAAGTACACAAAGGAATGCCTGAGGATCTGTGGGATGGATTGTTTAGGCCAGGTTTCTCA  
CCCTTTCTTCTTTCCCAACACACGTGACGAGTGGTACAATCCCTTCTCTGATTCACCGTGGAAGT  
GATTC

>chr4\_139792150\_139792350

TTAGCACATGTTTCGATGTAAAGGAACATCCTTCTCCATTGAAAGAGAAATTTTATTTCTCTGGGA  
GAAAAAATTACAACGTGTAGTCACTAGGATGCATTATGAACCTGTTATTGCGTGTGGGATTTATG  
ATCAAGGTCTTCTTCTTCCGCAAGGATTCTTCAGCTAAGGGCGGAATTACAGATTTTCAGCGCCC  
ACAAA

>chr6\_138437307\_138437507

AATCAGCATAAttttttttttttttttttttttttttttttttttttttttttttttttttttttt  
tggagacaggggtctcactttcttaccagggtggag  
tgcagtggtgcaatcacggctgactgcagtgactgcagcctcgacctcctagggctcaagtgatc  
ctcccttctcagcctcctgagtagctgggactacaggtgtgcaccaccagctcctgctaattttt  
atatt

>chr8\_3896792\_3896992

TCCAAATTCCTTCATGATGTGTACTTTCTATGTAAACCAACGATATCAAATGTGTTTGTGTTTGGGA  
CTATTTGCTGCTGAAAGCTCTTCACCCACTCTCTCTCCTGGCTTTGGGAAGGATTAGAAAAATC  
TGGTTATATAATTTTCAGGATCACATTAAAAAATCGGATTTCTTAGTCTTGAAACCTTACATTTCT  
TTCTC

>chr8\_54230447\_54230647

TGTGTATATATGTGTGTGTGCATTTATCTTTATCCagaccatagcatttttaaatgagaaaatac  
tctttataaaggAATAAGATtggttaaagtaaataaaaatgaaacacgacctgaagaatccctga  
gcatacaaagccagccgggcctcctcgtgacctcaaccttgcttgatttgcaaatataagtga  
cttaa

>chr10\_26055194\_26055394

TGAAATATCTGTTTTACAAGTAAAGCAATTTTACCCCCACCCTACTCACCCCTAGATGAATGCCTG  
ATCATCTTTCTGTTAAAGTGTAGTCCCCTGCACATGGATGCTCTTACCAGAACACCAGTGCTGTC  
ATTTACATTCCATGAGGAACCCAGGAATTTAACCAAGCCTTCGCGGAGGCTCTGAAGCCAGCCCT  
ACCAT

>chr10\_50135194\_50135394

AACCTCTCGTTAAGTACTTCTGCTGTTGCCAAACAGCAGCCGTCTCTATGTGCTGGTCAAATGAT  
GCCTCCCCCGAACCCCTCCCCCTGCTTCCACACACATCCTCAGACCCATGCTAAGAGGTACATCA  
TGCCCGTGTCTTCATAAAGTGACCTCTCCTTTGCCATTTAGTCATCCGCAACACTCTCCTTTGT  
GGTAG

>chr11\_84101552\_84101752

TAGGGGAGAGGTCAGGAAAACTGTATGAGTTTCGAATGGCAAGGAGACCCGAGGTGGTAAACAG  
GAATGACCTAAACCTGAGCAGCATCTATGGAATGTGAAGCCTGGGCCCAAAGGGGAGCACTTGG  
ATAAATTATAGAGTCTGGTGATCACCTGGTCTTAGAGGCTGTGAGAAAGAGAAGTTAAAGCTAAA  
ATTCC

>chr11\_127639390\_127639590

atthttgtggttaaggggtgatattgtgggggttttaagaagaaatatttgtcatttagaactactgg  
tgatggcctggatacagttttgtatgaattgaaaaactaaacggaataagagaaggagaaaaaca  
ggtgttaaggactaagaattgggagtacctaggacatctaattagagagtacctaaggaggttc  
agcat

>chr12\_125281847\_125282047

aagcagcgtcctggttgagtccccGTCCCCATGCCCTCCCCAGTTTCAGGAGCAGAAAAGTGGC  
CACACGGAAGCAGCTTCCAACACACGTTTCGTTTTTCAAGGCTAAAGGCCAACAGGCAGCAAGCTG  
ATCTCCTGATCCCCCTCCCCAACGTGCCAGCTCAAAAAACAAAGAAATAAAGGCCACTTCCTCT  
CCCCG

>chr14\_65048047\_65048247

tttagaacaatgaatgcagtttagagttcagtcctcagtcctccccttatctgaggtctacatgcc  
gtggaccatttgggtgggggtctgagtttctgaaaaacaacgcagggacatatgttaaaatgta  
tttttactttatataggaaccaaacatcttgtgactctaacttccttggctgtcttttaagcta  
ctggt

>chr15\_61436508\_61436708

gtcccaaactggtaaaaaaggagctgagccttttagtthtttgatgtaggggtattccgaggaaag  
gggcgtgacttggccaggggagtggttcagcgaaggctgagttccttctgctacccacatgcac  
agcaactgaggactgagaacttgggtcctacagagggatctgggaagctcagcacagcTGCCATG  
ACTGT

>chr16\_84170299\_84170499

GCCCCACTAGACACCCCTCACCTCTTGTGAGGGGAGCGCCATCGTGTGCAAGTACCTTAAACGT  
GTGTTAATATTATTGTTGCTATGTATATTTTAAAAATCACAGAGCATCAGGGGGCTGATGGCAt  
tcaaggtctggtcctcagccttgatggatagaaaccaagttcttcattccttagaggcagctca  
agaca

>chr18\_25358802\_25359002

ATATTTAAGCATCTGCAAATACCTAGAGCATGTTTCTGTATCATGAATAAAAATTATAAATCTT  
AGTATAGGACATGGGCTGTCTGTAAGGGGTGCAATAAAAAACAGAAAAGAACCACGAATGGCCCCA  
ATAGCCTAGTCAAATTAATCAGAATGTGAGCTTTTTGTGTTATTGTTTACCATCAACTTACTT

TTGAA

>chr22\_28605800\_28606000

gatctgaaaacacacagactgcctcctcaagtgggttcctaaccctgagtagtctaactgagag  
acacctcccagtaggggcccgactgacacctatacagacaggtgccctctgagacgaagcttcc  
agaggaaggatcaggcagcaacatttgctgtactgcaatatttgctgttcggcagcctccaatgg  
agata

>chr22\_46515336\_46515536

GGCTTTGGGTAGCACCCCGCAGGCCAGCAGTAGAGCTCATATGGCCTGGGGTCACCTCCGGGGG  
GAGGCACCTCCAGTGCCCAGCCAGGGCAGGCTGAGTGCGGGCACCGGAGAGGCCAGCTAACAG  
CAGGAAGCCCAGCCCTCGAGTGATTGCCCCCTGCAGCCCTAATACATGAcagaggggcctcgggg  
tggca

>chr12\_128643647\_128643847

aaacaaatgttttataaagtcaagtaaatatagaaatagcattataagcatattatagtgtcctgg  
aggaaaacaccgccagaagaatcaaaagctccaaagtctaaaagaggctgcagaagcacagatg  
tgaacttgaagagggtggaatgacgacttttgaatttcatcataaccttagatttaattagttgc  
cacat

>chr19\_10198000\_10198200

AGGACCGGGTCACGGGAGGGAGAGCAAGAGGGGGGACCCGACCCGTTTCATGGTGACTGACCCCC  
TCTGAAACAGGAGGGACCAGGCATTGTCCGTCCATAACTCATCACCCAATCTCACTTTTTACCT  
CTCCATCATTGTCCGGCCAGGGAGCCTGCAAACAGTAGGCGCTCATTATGTGCTGATTGTATTC  
AATGG

>chr3\_47118196\_47118396

ACTCATTTCAAAGAAAAAAGTATTCCAAGTAAGGAGAACAGTATGTTCAAGGACATGAAGAGG  
TGAATATGTATGAGAAGACTGATGTGCCTCATGCACTGAGTGTGTAAGAGAAACTGCCTGCTAG  
GCAAGAAGTTTAGACAGATACGGAATTACTTTCTCTATCATACACTAAAGGCTTTGTTCTTAGAG  
TAATG

>chr17\_71511805\_71512005

CTTCTTGGGAAGAAGGGGCTAAGCTGGGGACCCACCCCTGCAGCCCTGCTCCCCGAGGAACCACC  
TTTTCAAGAATCTGGCTTGAAGATCCCAGTgggagaagataaattgggtttacatcccatttcca  
tgctaactagagtttgaccttatgcaaattcacctcctgggccttacctgtctcatcagtgaaac  
agatg

>chr12\_32240333\_32240533

aaaagtctcaggtgctcattaaagagaaagcacttgtagcagctgccccaaagactgggctttctg  
attagcatgctgggtggcttcctgacggtagaggggaatccctaagaaggacatttgacCCACCC  
ACACCCGCATATTGCAAAACACACAGCTTCTGAAATGGTAAATGGCTGGCTCAATATCTTTGCAG  
TCCCA

>chr7\_119393364\_119393564

TGGTGAGGTTACAGtcctagtcattcagttaagcactaatttcagtgttcctatgaagaattttg  
cagatgtcactaaggCACAAACAGCTTCTGCCTGGGCCAGGGAGCTCCATCCTGCTCCCGATCGC  
TTCTTGAATACTGTGAACAATAGCTTTCTCTAATGCCCATATGTTCTATCCTGTCTATGATCTTT  
GGTCC

>chr2\_58724496\_58724696

ttctgcggtgaactctttctctctgtaatccttcccccttttacctggteacctcttacttgacc  
ttagtcagcagttcattcttcacttcccctgggaagcctttgattcctcaaaggcacataatgct

cttcgatggctctcacatgacatcttgaaccacagttttagaatgcctttcttggttaattagttgatc

>chr5\_120277901\_120278101

TCAAGTTTAGGGAAATTGCTCAGAATCAATCTTAGCTAATTCTTGACTTATTTTACTCTAATTTGTTCTTCTTATATTTACTCTTCACTCTGCTAGTTTTTCTTTATATTATTAGTTCTTTTGAATTAGGTCCTGCCGAGTTGAAGCTCAGTCATTTGATCACAGATGTCACTCTCTGCTCATCACAGTGATCTTGA

>chr17\_79899309\_79899509

GCAGCCGTCGCGCATAGCAGGGTGGCCAGCATGGCGAAGGCGGCGGTGAAGTTGCCCCAGGAGAGCCGCAGGCAGCCGTGGAGCCGTGTGAACTCACAGGCCACCACCAGCGCAGAGACGGCGAAGCAGAAGCCCCAGGCGGCCATGCAGAAGGTGCCCTGGACGCCCGCAAAGCCACCCCGGTGGGCCACCAGGCTGAA

>chr15\_83376146\_83376346

ccccagtctcattccagacaccagaccAacttggactgtgccccagaaaacttgtcatccctactatcttctgactagtcatactcctattcaccatactcaactactatacatgcccctgctcttgtttacactgcccgtttacactgtttctccaaccattacagctgatatctcctggtgctatccccaaactgcc

>chr3\_39619996\_39620196

atgaattgaaaaactaaatggaataagagaaggagaaaaacaggtattaaaggtctaagaattgggaggacctacgacatctaattagagtgcctaaggaaattcagcatagtcctgtcagcaaagattattattacttcaagagtttaagagtggcagtttggggatagcaccaggagatatcagctgtgatggcttg

>chr15\_93824396\_93824596

ctagggatcttctcctaagaaataattaggcaaagagccaagagttatgcacaaggatgtgtgccctcaggagtgtttataatacagctcaattggaaacacttttctctctgtccaggattaaaaaatgaaggcatgttatctcatggaatagtatagggtcattgtaaatgatgATGTAGATTTATATTTgtgtatgg

>chr14\_96362047\_96362247

ccttgggaaggtgtttccggcccattttttcttgctttgaaccacagcacgtgctgttgccccactggaacactctcccgttctcttctcctcctcagatctcagcccgtgtcgccttctctctgaccctggtcccttccactgcaggctgttgctccgggtgtctctgggctgctccaccacgtggtgctgcccatt

>chr19\_12249400\_12249600

ACAGAACACAAATATTTTAAAAAAGTTATCCATGACCTTGTGAAAAGATGATAAACCACTAAAA TACTGCATCTATGTGAAAGAAAGGATGAAGAAATATACTCTACAATAAAGAAAGTTGATAcaggaggctgaggcaggagaatcacttgaacccgggaggcagaggttgcaatgagccaagatcatgccattgcat

>chr21\_20926729\_20926929

GAAAAATGCTAATAAGACTCATGCTGAGAAAAGCTCTCACTCATCAGGGTGCATCATTGCAGACATTAAGCTGAGACTGTGAATTGCTATTAGCCAAAAGTGGAGAAAGACTAACGAGAATAGTGCCAGAAAATACTTCGTGGCACTGTTTGAATTGCTGTCTGAGGCAGGAGGTTTGTGTATTGTTTTGAAATGATT

>chr8\_728600\_728800

tgccctgtgtcagtgtagccctgttggggggtgcctcccagttaggctgctcaggggtcaggggt

caggcaccacttgaggaggcagctctgccccttctcagatctccagctgcgtactgggagaacca  
ctgctctcttcaaagctgtcagacagggacatttaagtctgcagaggttactgctgtcttttgt  
ttggt

>chr14\_104320447\_104320647

CTTCTTCTGCAGCATTTCCTCCAGACTG  
CCCAGACCTGGGTCACGCATACAATCTGCCACCTTGAGCTGTCTATGTACCTGTGCCCCAGG  
GGCCAGCAGGCTCCATGAACAGGTGTGCCTGGTTTcttccatgtaccacccagggtccaggccc  
tggtg

>chr13\_79856399\_79856599

TCCTCTGCTTTGCACCAAACACTGAAAACACTCATTTTCATGTAATTTATGGATTCCCTCAGCTTTT  
TACTCCCGTTAAACTTAATTACTCGAAGAAAAATTTCTCATGTAAAAACATTCCCTTGGGAGATC  
TTCAAATCCCAAATAAAAGAAGTAGGTGTCTAAGCAGGTAAGTCCAATATGAAAAATTGAGGAAA  
GATTA

>chr2\_231769756\_231769956

ACAAACATGTCCACCCTGAGCCGGTCTCTGGAGCCCTCCTTAACCACTCCAGGCCACTGGCC  
TCAAGGCTTCTCCACTGCCCTCAGGGAAACCCCTCCACCCACTCCCAGAACTGTGCTTTGGCTGG  
GGGCTCACACAGCGATCACTGGGTCATTGGACATCAGTTTTCCCCAGTCAGGGTCATTCCGTCTG  
AAATG

>chr2\_54612096\_54612296

AGATGGGGACGGCACTCTCTGCCAGAAAACCAGTCTCAGCAAACCTTGCTGAGTTAAAACATCAG  
ATTTAAGCTAAAAACAACATATATTTCCAAAATATGCAGCCTGTGCACCATGGGAAAAGGAAGACT  
ATCCGTACCTAGGGAGTAGATAAGTAATAAATAGTCTCATACTCTTTTAAGGAGAGCAATGCCCC  
AGGCT

>chr13\_56227399\_56227599

TTGTCCATACTTTAGATGAACTGAATCAAGCCTACTATACTCACTGACCCAGCTAAATGTATACT  
TTGCAAAGGAGTAATAAGAAATGTCCTGTGTGGTGTGTGTGGCCATGTGCCAATGTGAATAAATG  
GTGTGTTGAGCGTAGAGTGGTAGCTAGACTTTAGAATTTGCTTGAGGGTATTAGTTGAATAAAT  
GTTTA

>chr14\_65434647\_65434847

tctccctgcttcaagtcttaacccttCTTCCAGCCAACCTCATTAGTACCCTACTCAAACCCC  
TCCTACCATTGCTAAGGCTCATGTTCCACCTCCTTGCCAGGCTCTCAATGCCCTCTGCCAACTG  
GTCCCTGCATTCattcattaatttaacaacaggcattgaatctgcctggccctgtactagggact  
ataaa

>chr2\_1240049\_1240249

TAGTCTCCAGCATTTTGAAGTGTAATAAATTAATTTATTATAGCAGACATCCAGGACCAAAGGCC  
CCACGGGAAGCGATGGATCCTGAGGGACAGGTGCTCCCCAGGAGGACCAGGAAAGGTGATCAGAA  
AGGGCTGTGCGAAGGTGGAGGCAGAGCTGCCTGCCCTCCCCATGCAGGGGACCTGCTTCCTCTGG  
CTTCT

>chr12\_7403733\_7403933

gccaaagatggccgaataggaacagctccggtctacagctcccagcgtgagtgacgcagaagacgg  
gtgatttctgcatttccatctgaggtaccgggttcatctcactagggagtgccagacagtggggg  
caggacagtgggtgcagcacaccgtgtgccagccaaagcagggtgaggcttgcctcactgggaa  
tcgca

>chr21\_18840329\_18840529

TTTACAGAAAAAGCTTATCTAGCCTCTTACATGAGGACCACTATTTGTTTTTCTTAAACAGAGAG  
TAACAACtCagggctgcaaaatacctttgagattacctaattcaccctcttcattttacagata  
TGCACCCAAGGTCTGGTACGCTTTTACTAGGTACAGTGTGGGGCTGAAGAAAACAGGGTTGGGTT  
GCTGA

>chr12\_96380469\_96380669

CTACCAATTCGACAGTTTTTCTTCCCAATTTTCTAGTCGGGACCAACTCTAATCCTACTCCTTT  
TTACAGGACTCCTAAGTCCTGTAAAAAGATTCCCTAAGACAGCACAGAGCTTGACACACCCAGATC  
CCTGGGTGCTCTCAGGCAAGTCACTCAACTTCCGGGCTGTGTGTATCTGTAAATTGCAGTTCCTT  
CAAAG

>chr11\_61991824\_61992024

agcttgattgctatctcatggctaaggttccaagctactgaatcttcatttatgtgtgtgtata  
catgtccagatgtgtttatgtgtatgtacacttattggtacatgttggtgtctaccaattggctta  
taaggcatcataaattaagtaaataagtctaagtaattttcaagctcacatgacctaaagtatga  
cttta

>chr1\_162369176\_162369376

AAGGGTACCCCTGTAAGGGCTTACGTCTGTACCTACAGGCGGGCTTTGCTATCTTAAGGGACTAT  
CGGAAGTGGACTTCTGATGGGAATGCAAAAATGCAATTAATAAAAAAAAttccaactgttattttaag  
ttcaggggtacatgtgacaggtgtacaggtttgttacataggtaaacgtgtgccgtagtggtttg  
ctgca

>chr18\_56436820\_56437020

ATTCAGAAACGGGAACAAGGCTATTTGAAAACCTTTGCAATGTTATGGCAGAAATAATCTTTGCAG  
GATGTAAATGAAAAGTTCCAAGCAATTACGACAAATTTTGGAGCAATTAATGCACTGGGTCTTTA  
GCCTTCAATGAGCTGGAAAGCTGAGCAAGACAGAACTTGAACCCCTAATAATTataacagctaat  
actta

>chr11\_94165952\_94166152

cagagcgagactccgtctcaaaaaacaaaacaaaacaaaacgaaacaaaacaaaacaaaacccct  
tatctgagttctgaattcacacattcaattgcctataacttcccttcatgtaagtttctagcat  
ctcaaacctttcacatctaaagtggaacttttaattatatgcctatcattccctacaacacatct  
gtcct

>chr12\_43865133\_43865333

tcctacgcccacggagtctcgctgtttgctagcacagcagtctgagatcaaactgcaaggcggca  
gcgaggctgggggagggcgcccgcattgccaggttgcttaggtaacaaaggagccaggaa  
gctcgaactgggtggagcccaccacagctcaaggaggcctgctgcctctgtaggctccacctct  
ggggg

>chr8\_10405990\_10406190

CGATGGGCTGTGGCACCGCGGGCTGCACTGGGTCTGGGAGCTGGGAGACGGTTTCCCTCACTC  
TGAGGCTGGGGTCACTTTGGACCCTTCCCTTCTGACACGGTGAGCCAGGAATCTGGGCCAACAC  
CTTAGCCCCGCCATTCCCCCTGCCTGCAAGTCTCCTGCGGAAGCAGACGAGGAGCTGTTGGGAC  
AGAAG

>chr7\_128678364\_128678564

ATGGACaaagcaaaaaataacagatgctggtgaggttgagagaaaaagaaatgcttacacactg  
ttggtgggagtgtaaactagttcagccattgtggaagcaatgtggcgattccttgaagagctaa  
aaacagaactaccattcgacccagcaatcccattactggatgtatacccaaggaatataaattg  
ttcta

>chr13\_110969599\_110969799

ttgcaccacactcacacatacacacagatgcacacacacacgcacatacacatagatgcaaatac  
acagagacacacacttgcacccacacacacacagaaacacatgtacacacacataaacacacaTG  
CTCATGCGTGTACACACACACACTTAGCCGGAGGACGCTCCTGGTTTCTTTCTTCATGGGAGC  
AGCCA

>chr5\_174967394\_174967594

tctctggctgggtcccacctgggctcactcatgtagctgcattcagttgccagcagttccgagatg  
gcctcagccacatgcttggttagtggtgctggctggttgctggggcacctcagtgctcctcccca  
cggcctctcctcccgcaaaaggccaaactggctttcttgacagtggtcctcaggacagcaataca  
ccagg

>chr21\_44167331\_44167531

GAGAGCCCTGTAGCAATGTGGGGACCCTGGGACCAGTCTCAGTTAAGCTGGAACCTCCCCGGATG  
ACTGGGGAGAGGAGCTGCAAAAAGGCAGGGTGGGGGTGGGGGGCCTTCCCGAGATGGCAGCCCAGC  
CAGAGGCCAGCGTTCTTGCCCTGGGAAGAGAATAAAGGCCCCAGACAGGGTGGAGCTAGCTCAG  
CCCCG

>chr8\_27509681\_27509881

gctgagaccaaggaatctggggggtcctgcaggtgagaccaggatctgaggtttggttcttct  
catacacattagggtttgTAGTAGTTGACCTAGGTACAGCACACAGCCAGAGGCAAGTCACTTC  
TGCCTTCCAGATGCTGACAGATTGTGGTAAACTTGTTACAACAAATTTGATGTTTGTAATCCCAT  
TCCAC

>chr8\_75779245\_75779445

ccaactgggtggagcccaccacagctcaaggaggcctgccgcctctgtagactccacctctggg  
ggcagggcacagacaaaagcaaacagcagtaacctctgcagacttaaatgtccctgtctgaca  
gctttgaagagagcagtggttctcccagcagcagctggagatctgagaacggggcagactgcctc  
ctcaa

>chr9\_72715180\_72715380

cagataatataattaacttgcccaaagtgcattgtttctaagtggcgtggccaagatttgaacc  
aacatcaagttgatgtgatagccacattcaaccactctaccatactgTGTCCACAGCAGGACCTG  
ATCCAGGGAGGCAGACAGTTAAGGCATTCAGAAAATTGAGTGGGAAGATCCTCGTTTGAATTCAG  
GGACT

>chr5\_132936901\_132937101

AGTGACTTTATGACCAGGACCAAAGGTCACATAAATATCGATTGGCTTAAAAATGCATCAAACCT  
CTATTTTGCTTATAAAATTATTAGGCACTGTAAGGAAGAAAAGATAAATAAGACAGGCTCCATCC  
ATATGCTAACGTAAAAATAAAAGAGTAAGAAAACAAAAAGAGAAAGGAAGGACTAAGAATTCAGA  
AAAAG

>chr4\_146813550\_146813750

ACTTTCCTCTTCTGAGGCTTGAAGAAGGAGAAAGAAAGGACCATTAAGGAAAACAAAAAGGTAC  
ACTGCATCTGGCATTAAATTCACATACACTGCCATATAAAAAGCACTAAAAATGATTTGGGTTTTT  
TTCTTGACAATTCCGAGATTTTATCCATAAGAAAGTTTTAGTACTGCTTTTCTTCAGGTAGAAAC  
CCATA

>chr11\_126458790\_126458990

GGGGGACCAGGGGAGACGAGGGCATCAGTCACTCCAGCAGGGAGCTTGCTGCAGGGAGAAAGAGA  
GAACAGCAATTTGGGCCGTGAAGCCTGGCACTCATTCTTCAAGGGGGCTGCAAGCCCCAGGATT  
TTCTTGAACCCAGGGCACCCGCACACTAGCTGCCTCTCCCGTCCCTTCCAGCAACCTGAGGAA

ATGCC

>chr7\_189517\_189717

tgtgtggctgtgtgtgtgtctctatgtgtctgtgtgtctgtgtgtttctgtgtatctatgtgtgt  
atgtgaatgtgtatctgtccatgtatctgtgtatatctgtgtctgtgtgtgtgtgtatgtctgtg  
tctgtgtgtatatctgcgtctgtatgtatatatgcgtgtctgtgtgtatacgtgtCTGTGTACCT  
GTGTC

>chr12\_74936133\_74936333

ATTCACTGTAGGGATCTACTATCAATTAGCTTTCAAATACATCTGCAGCAAATACTTTTGGTTCC  
TGTTTTGTAGGTTTGGAGTTTAATATATTTAGTGCTAAGCTAATTAGTTTTCTAAAAAGATAATT  
GCAAGACCCCTGCTTTACCAAATACTTGACAATGGGACTTTGAAGGTTATTTCTTATGTTTTCTG  
ACTAG

>chr3\_172082306\_172082506

CTGCCCCAAGGGCACCCCTCTTGCTGCAATCCTGCCCTGTGTGGGGCAGCAGCCCACTAGTGCC  
TCATAGGGAGAACTATACAAATGTGTAGTCTGATCCAAGGTTTTCCATGACACGGTGGCTCCTGG  
GCAAAGAACAAAAGCTCCCCAAGCACTTTTCAAATGAGGTTCCCTGGCATGAGGCATTTAAATAT  
GCCAG

>chr4\_30918902\_30919102

GAGCTCTTTCAGAATTTTCACTTCTGTATTAATTTGGTTCACACTGCCAACTTAAATACTTGGCC  
ACAAAAAATTTATTATTCAAACCTGTCAAATGAATCTGAAGAGCTAGTGATATAATGCTGATAC  
CATACTATAGCATTCTaattaaaatattttaaaatatgaataaaaatGATAGGTGTGATATATTA  
TAATC

>chr14\_67723647\_67723847

tcatthttgccaaggctaaggacgcggctgtgacacagcctcaggaggtcctgacgacaggtgcc  
aaggtgatcggggtacagcttttttaaacgtttttagggagacatgagacatcaatatgtacg  
ttggtttgatccggttaagacggaacaacttgaggcgggggctttcagttgataagagttagcggg  
gatca

>chr17\_41956074\_41956274

TGGCCAGCAGAGGGACCCCTGCGCTCAGAGCGCCGCAAACCCTCCACCTCCTGGGAAGGCGCAGC  
AAGACATAGGAAGGAGGATGGGGCTGGAGTTCTGCAATGAGGCCTTGAAGCCTCTCCTCCAGGCG  
CTGCTGCTCCCTGACGCTGACTCAGCCCTCCAGCCAGCCTTCCCGCTCTGGCTTTCTCCTACC  
CTTCA

>chr7\_105669964\_105670164

AGCTGGAAAGTTCCTCTCCTCCACctctgtctctctctctctctctctctctctctctctctTTGA  
CAGAACCTTATCTACCCCTGGGAAGTGAAGTGAAGGAACTTGAAGGTGGCTCCCTCCAGCTCTT  
CCCTACCCCCACGAATAAGGCTTTGTGTCATGGTCCAAGCTTCATGAATTTGTTGCATAATTCAATG  
GCTCC

>chr1\_55461212\_55461412

agcaggtgcgaggccctgggatgcatgctgttccaggaacagcatggggccaggggtggtggaa  
tgggtgagtgagagggggcggtggcgggaggcaagctcagagggttgatatgcaggcagcggggc  
caattatccagagcctttcaggtcatcttaaagcattttggcttttactctgatgagatggggagc  
cattc

>chr1\_179553177\_179553377

taataggcagcaggggtggaaaacacattggtctgaccaggagctctctgggatgtggttaagtaa  
ttttaggaaccaaggaatgaactcaacaataaccattaagtctttttggtttgataacaaa



aacaaatccaggccgggagtgactcactcctataatcccagtgTTTTGGGaggccaaggtggga  
gcatt

>chr2\_97075673\_97075873

CTCTAATTACTTGCCCAGCATCTACCAAGCAGGCCCTGTCAGCGGGAGTCCTGCCTGCACTCCTC  
CCGGGGCGGATGCTCTCCTCTTGGCTAGCCCAGACAGGTGCCCTTGGGCTCCCCGCCAGGCAGGC  
ACTGACCTCCCGCGGTCCAGCCACCTCCTGCTCTCAGGGATGCCCCAGCCGGATCTCAGCCCAGC  
AATCC

>chr2\_121624930\_121625130

CCCGAGTCCAGCCAGCCTTTCCGTTAGCCAGCCAGCCAGCGAGCGCTCCTAAACCTGGCCGCCG  
CCGGTTATAAATGATTCATGCAGCCCCGCCTCCCTCGGCGGCCACTTGATGTTCCCTGCGCTCCA  
GCCCGCGGTCCACCGCTCCTGCCGCTGGGCAGTGCCGCCGCTGGGCAGTGCCCTCCCCGCA  
CCGCC

>chr2\_132302130\_132302330

GGGTGATCTTCTCCTGCTCGTGCAATCTTGAGCATGGCAGGACCCCCACACCCACTGCGGTTCTC  
CGGCCGTCACCTCCCGCCACACCCCATGCTCTGTGTTGGGGAGACCACCTGGGACTACCGGGTG  
GGGATTAGTGGGCATCGCGGGGGACTGTGGGAACAGGGCACTGTGGGTGGAGGTGTCAGGAACGG  
GAACC

>chr2\_200274155\_200274355

gtgctgggattacaggcgtaagccactgcgccccggccGCAAACCTCCAACATTTTCTAGAGCAAT  
ACTTGGCTGTAAGATATTGCATAGTTAATACGACTTCACTGAAGGAATAGCTTTTTTCCATGGACA  
AGATGGTGAATTAACATTTTTATCATGGCTAAAGTATACTGCCTACTTTATATTTTCAACGCCTT  
ACTTT

>chr3\_57186160\_57186360

GAACTCTCTCGGCTGTGACCAGAGCAAACGAGACCAAAGGCAAGCTGCCCCCGCCCCGA  
CCAAAGCATACCCTCACCCGACCTTTGTGTCCAGCATGCATTCCAGCCCAGGAGCTCCGGCCCCG  
TGGGCAGAGGCTGCACACCATTCTGCCAGCATCTAAATCGCTGCTTTCTGGCCTTTCCTGTCA  
GGCCA

>chr5\_113785501\_113785701

GTGAAATGTACAGATGCTGCCTCCTCAGATCTGCTACCTTAGATTGGATTTAGAATAGAGTAAGC  
ATCCAAacatacacacacacacacacacacacacacacacGCGCGCGCTCGCGTGCGCGCACTCT  
TCCCTTAGAAGAGCCCTTAACCCAGAATGGGGGCTTTCCCTGCAGGGTATTCCCACAACATCACC  
TCACA

>chr5\_141066816\_141067016

GCCTTCTTTATCCTGGAGAACTGGGGCAGCCCTGGGGTCAGGGGGAGGGAAGGAACAAACACAGA  
ACACCTCCCTTCCCCTGCATCCTCATTCCTATGACTGGGCCCTGTCTCCTTCCACCCTAGGCTAT  
TGACATGAGCTGTATTTACAAGATTTTTAATGCAATTTTACTGCAAATGTTTTATAAAgggtat  
ctagt

>chr6\_799600\_799800

TTGAGGCTTATTTCTCTGATGTAAACATTTTCTCAGCTCCTTGAATGTGTGGGGCATCCTCTATTTG  
TAGGTAGAATCCTGGAAGTAAATTTGAGGCTATCTGGTCATCTTCCCACCTAATAAGA  
CAAGTGCTTTTATCATGCTGATTCTGCATGGAGGACATGGTCTCATTTTCCCAGGAACTAAAGGC  
TGCTA

>chr7\_72978864\_72979064

agggtctcacctaactgcaggaagcctgggacatgtagtccagctttgtacctaggaaactgag

aagcggagttggggaacatagcaatctttgccacTGTGGGCAAGTCCCTGGCAGTCATGACACGC  
TCAGTGAATTAACGTGGGGTTGAGGAAATTTGGGGTGCAGCACATCAAGAAATTCACCTTTTGCCC  
TGGGT

>chr8\_25139883\_25140083

AAATCTCTGGTTTTTCGTGTCCCATCTCCTTTACCTGCTGTATGCTGTTATTGATGTTTTTGCTT  
TCTGATTCTGTAAGTTCCTTCAGTCCATGTAAAGATAAAATACAGATTTTACTAGTATGTAGCAAT  
ACTTGTATTATTTCTCTCTTGCATTTCCCCCTGTAGATTACAACACCAGACGCTCTGTTTGATGT  
CTTTA

>chr8\_62825446\_62825646

TTAAACATTTTAAAGTCATTCTTCTTAATGCTTTTCCAGTAGGTGAGTTACGTCTGATGAGTTGA  
AAAAGGACAAAAATAACCTTGAtttcttccagcattgcaccactgcaactgttctctcaaggcc  
attagtgccccaatgcttaatccactggacacttttctgtccttatAattatcaggaatctctca  
gttac

>chr8\_80031045\_80031245

TCAGTACatataataaagtatataataataaatatCTCTTAATGATATAAACATCTGCAGAGAT  
AATAATTTGGTAACTAGaaatattttataatatttttttCCTAAAATCCTATTAATCAGGTCTGA  
AAAGTCTGTTCCCTTCCAATTGTTCACTTTAAATCAAATTGCCTATTTTCTTCTACCTTTTTTAA  
AAGTT

>chr9\_120531179\_120531379

gcatcactaatggattatagtacttttccactgaactaggaagtagcctcagaatcactctctcc  
tactgctcccagcagctgctatcaatcaattgcagctttgccacTGTAGGAGCTCTTAAATTTTC  
ATTGTTTAGCTCTGACATTTTTCAGAGGATATAAATGCAATGAATTTGCCTAACTCCTGAAATTCA  
TTTTTTC

>chr10\_70860594\_70860794

tgggatggcaccttgggcaggactctgttttgcccatggcctcagctcccaccagatgcctctag  
tccctgggctcaggaaatagacaacctccttccactatcgctgtagcccaaggagggaagtattt  
tttctttctttctttcttttttttttttttttttttttacagagtctcactcttggtgccaggctgga  
gtgca

>chr16\_8858099\_8858299

GCTACAGAAATCTTTCTCTCTGAGCTTATTCTTCCATGCAGAGTATTTTAAATTTTCTTTTTAAA  
GGACAGAAGGGATTCTTTGTGTGCAGGACAAAAGGAGCTGGGGAAATGAATATGTGTTCGCATGAT  
AGGAGCCTTGCAATATGTCATTCAATCCTGCCCCACTTCTCGTTTTAGTTACTACAAACGATTA  
AAGCC

>chr20\_50013993\_50014193

AGGCCTGAGCCGCTGGCTTGCCAAAGTCCCCAAGCCCCAAGACACACATTA AAAAGGCATCGCCCT  
TCGACAAGTTCCTGGGGGGCTTACAACCTCAGCACTGATATTTTACTTGCATTTTTATCCTCGG  
ATGCAAAGTCTGAGGACACTCCTGAGGGACTCCCCAGGAGCCGATTCTCAGATGCAAAAAGTC  
CTGAG

>chr22\_20231000\_20231200

ATTGCAGGAGTCCCCGGGGGTCCAGTGGGGGTCCACCCACAGGGCCTAGGAAACACTGCAAT  
GGGGCTGGGGTCCCTCTGGGCACGCTCTATCTCAAAAACGGGCGCCTGGATGCCCGAGGGCGGGG  
TGGAGGGCAAGTGTGTCCAGGGCTTAGGAGGAGTCGCGTCCCACAACCACCCAGGCAGCCTGCTC  
CCTCC

>chr22\_49928596\_49928796

CTGAAGCACCAATTTAATTCCTTTCTTCCTCTTTTTTTAATTTGGTCTCTCCCCCAGCCATGAG  
GTACCCACGCAAGCAGGAGCAGTGATTTACCTGCCAGCCTTTCGCTGGTGCGAAGAACATTTTCAT  
TTTGCTAACGATATTTGCTGTTTGATAGAGCTCCTCAAGGTAAACTTCTCAAAACACCAAGTCCT  
TATAA

>chr1\_230653977\_230654177

TCCTCACCATCAAACTCTTTTGACAAATTGAATCAATGAATAGAATCTTTTCTCTTTTCTTTTT  
tcgccatgctggcctcaaacatattgggctcaagagatcctcctactgaagcctccatggagct  
ggggctgtaggtacaagccactgcacctggcTTCAACTAATAGAATCTTTATCCTAATTTTCAGGT  
CCCTT

>chr2\_233134356\_233134556

TAAAAGACTTGAGGGTCTAGCCAGGCTGCAAAGGCAAGCAGACTGCTGGTACAAGCATGGGAGGG  
ATGAGAAATGGCAGATTGTTCCAGGGTGTGTGGTGTAGGGTGCAGAGAGAGAGAGGAGCTAGAGG  
AGACACAGGCTAGGCCTTGGAGTCTGTAGGAATGAACCAGGGCAGCTATGGAATGATTTTAAATA  
TGTAAT

>chr3\_58023560\_58023760

catgatcttaaatgaaaaccacgatcacttgccagaaagaacaggtactaGGCTTTGAAAAAAT  
AAGTTAGAGGAGATAGCATAAGAAAAAATTAaaaaataaataaaatcaatgaaaacaacgtgta  
ctaaattcttgaaggttttttgaagactttgagcctgaggcctgttcttattgtttgtttgttt  
gtttg

>chr5\_54923443\_54923643

GGAAATAAAGTGGAAGATGATGAGAGAAAGAAAAAGAAAAATGATGCCTGAGGCTAAGGGATAATG  
GAGCTTCTAGAGTGAGTTCTCCACCAGAACAACAGAAAGGGAAGATAATGAGCATCTTAACTGA  
TACCAAGGGGCTGCATTTGAATATTACTAGTTTTAAATACTCATAGGAATTTTCATACAATTAAT  
TAAAA

>chr6\_125754101\_125754301

ctgagcaagaagaattcgagaatccagcagctccctccacccccgacatccccaccaccgactc  
cttgatgaaccagaatagattctgagaaactctgcaactgccacgggtcagagaagatttatgggca  
gaaaaaggaaagtgatgtacagaaaacagaagtgggtacagaaacagttggattgttgattgg  
ttaca

>chr6\_155470708\_155470908

ATGCTGAATGTTTAACTTGTGGAAAGTTTTTTCATCTGTGTATATATGAAGAATTCAGCATG  
Aggctgggcatggtggctgacgcctataatcccggcgcttgggaggccgaggtgggagatcac  
ctgaggtcaggagtttgagaccagcctggccaacgtgggtgaaaccccatctctactaaaaataca  
aaaat

>chr7\_28428675\_28428875

ACAGCCATCTCTTTAGGATTCATACAGGCATAGTTTATCAACAGCGTCAGAGCTTTCTCACATGC  
AAAAGCCTCACGTTTATTATTTACTGAATATTGGGGAAATAATTTGAAAAATCTGCACATTAGTT  
ATGTATGCATTCTGAAAACAGTGAACACTATTTGCATCTTAAAAAGATCTGAGTAATGCTGTATA  
ATATT

>chr7\_90954864\_90955064

GTTAGATACTTTAATTGACTTTCAGTGGCAGTAATAAGTAACCTGGAGTCCTGGCTTGTAGAATTT  
CCTTTCTAATTGTCAGTGTTAACTACTCATTATAGGGATAAATAGCATACCGCTTTATTTAAAC  
AATTTCTTCATACATGTAAATCCAGCGGAAGTTCCAGTATTTTCAGGCCCTTGGGAGAGCTG  
TTTGG

>chr11\_41479624\_41479824

TTTGACCCAGGCAACGTAGCCTCTGAATAAATCTATTATGTTACAATTTGCATCTTCTTTCTATA  
CATAGACATCAACAGCTGGAGAGAATCACTTAGGTATGCTCTTCTCTACCTAGTTAACACACCTG  
TCATCTCTTCCATGAACGTGTCCACAGTAACAGTTCAAGTTGGCTAACAGTCCATGAAC TAACAC  
TATTC

>chr11\_76780752\_76780952

ACCCGTTCTGTCTCTGTCCCCATCTATTCAAGTGTTTTGAGTGCCTTCAGAGCCCCCTCCAGGCA  
CCTCTCAAGTGCCCTCAGAGAACTCTTCTGCCTCTCCATCCCTGGTCCCCGCTCAAAACTTTCTCCT  
GGGCTCACCGTGGTCTGAGGCTTGGCCTTCTGCTGCCACCTCTGAGCCCTCCTCCAGGCTGG  
TGGAG

>chr11\_131788190\_131788390

CAATGCATTTAGCTGACATTTATCACCGTATTCTCTCCTGACTGCTGGTTTAGTCCGTACCACAC  
CTTGCGTTCTTATGCTTTGACTCTCATTCCATGTGGGACAGCTgtttgctgtgggtcaggtcctg  
tgctgagcagtttaccagaagaacctcatttaatcctcacagatactccatcaggtggacacaat  
gatta

>chr12\_120885617\_120885817

gcatgatctcagctcattgtaatgtccacctcccagactcaagagagcctcccatctcagcctcc  
caagtacaggaccacaggcgctgccacttggcctggctaattttttgtatttttgatagagacg  
ggattttgccatgttccccaggcttgtctggactcctgagcaaaggtgatccaccatctcagcc  
tccta

>chr13\_44995200\_44995400

AAATGTGATGTCCAAGAAGCACTCACCTGCTCACCCGCTCAATGGAGGGCCACTTTCCTTCTCAA  
AGTGCTCAGACACAATCCTCCTAGCCCACCCGCTAGGCTGGCGTCCCCACTCTCTCTGCTGAGA  
TGGCCTCTTCCACTCAGTCCCCACATCTTCCACACTCAGTTCAGGTGGCttgtttttgttttt  
gagac

>chr14\_77688047\_77688247

caacctcctcaaagtgtgagctcccgtccctcactccaccagacaacctgaaggtcagcagtg  
tccccccaccgctaaatccaatggacttttctcagttcacatcttgctgcgttctctgaaacg  
tctgaccctgtagaccgtctttctctcttgccacaggtgctctccgttgcataggtgatgtcacat  
tcttt

>chr15\_80681745\_80681945

cctggaatagtgccctaacacttagtaagcattcaataagtgatagctgtcaGCAATACTACTCTA  
ACTTGTGTGATGGCTCTGTATATGTAAATTATTGAATAATTAGGGTAATAAATTATACCCATAA  
ATTATACCCAGGCTTTAGTTAAACAGGTATTTTCCAGGAATGTGTGCCTGTTTGGTCTcaacaatg  
ggaaa

>chr16\_55424899\_55425099

AATCGGAGCTGTCTACAGGTGGGGGCCAATTACCATCTGAATAATCACAGTGCCACACAAGAATA  
GCATAGCCGCTGAGCGTGACATATTTTTATCTCTATGCATTTCAATGAAGTCAGGCTAGTACATA  
AAAGGTTATCACCTAGGAAACATATTTTCTAAGCACAAAGTTAAACATGCAAGTGAGATCAGCAA  
AGATA

>chr17\_48664001\_48664201

tcccaggaggtagtgttaccctgtttaacagaagaggccactggggatctgagaggcaaagggaa  
ttgccaaggtcacataggaagaaagtctcagagTTGGTGGCACCTTTCTAACACCAGTGTTTGG  
CACACAGAAGGCACTTTTAGGGCTAGTTGATGGAGCAGCTATGAGGCTTGGGGAGCCCCGGTGTCT

GGGAA

>chr17\_55994801\_55995001

TTGGAGAGTCTCAACCAGGCCTTCACTCCACGGAGTCTCTCCTGACTATAATTCTTACAGGGAA  
CAAAAACCAAGGataacaataaacttactgagcatgccatgtgggcctgacactaacacttgtc  
tcattgatcctctcaaccatcccatgagagagaggcctttcttctccccattgactgatgtggag  
acagg

>chr18\_22761202\_22761402

GTTATGAAACATATTTTTCTAGTCCTCCCAGGAGCAAGGCCAGGTTACAATTTGACCTCAGAAA  
CATAGCAGTCCTGCAATGCCAGACAGCCTGATAGAACTCAGTATTAGTGCTCTCTGCCTGGCCCA  
CACAAACCATAACATGCAGCATGGAGCAATGTTACTTACGGGAAATGACAAGCAATGGATCAGTG  
GGGGA

>chr20\_24898800\_24899000

CGAGATTCTCCACGCCAGAGGCCCGGTGGGTGGGTGAGGGGCCTGCCAAGCCTGGGAGATTTATT  
TGCAGGATTTTCCCCACGGACTCATAACTGAAATCGCAGAAGGCCTTGCGGTTTAGAGGCCCTGT  
CTCATGCCCAAATTGCATTTTCCCGAAAGGGCTCAGGGCGACTGAGGTCCCCACCGCCGCTGC  
GGAGC

>chr20\_56046194\_56046394

CGTCTTGTTCATTTCCCTAATCTCCAGGGCAGGCACAATTGTGCTGGCCAAGTGCCAGTGG  
GGGTTTGGAGTGGGGTTCGTTTAGCTTCTCCTGCCCTGGAACTAAACTGCAGTGGGTGGGAGC  
CGGTAACAAGGATTTACGTTTCGGGGTTGCCCTCACCATTTCTTTAACACATGAGTCCAAGGTG  
GCCGC

>chrX\_133048134\_133048334

ATAAAAAGGCATTTCAATGGTGAGGAATGTTTGAGGACTATTAAGATGTGACAGGATTCCTAGGG  
TAAACATGTCTTGCCTCAGGCTTCTGGGAGTCTCTAATCCCTATAACAAGCAAGGTCTAAATAA  
GAGAAATaataaactagctactatattgagcaagcctgtatcatgtgccctttacatgaatt  
gtctc

>chr1\_16443213\_16443413

taccgtttcttctcctcagatctcagcttgataccgcctcctccaggaagcctttctgactctcc  
acaggctgagcacgttgctcagttcctgggtcccacagccccacgcctgtcatatcacatttat  
cttttgaaatattctctccagcgactaggagttctgtgacggtgcggcctgggatctcccaccct  
tgctg

>chr2\_43941096\_43941296

AAATATACTATGTACTATGTTTTTCTAAAATACGACTGTGAAAATGTTTTCTTAGTTACTGATG  
GGTTAGGGAACAAAATATTTGCACAATACTTTTCCAGTGAACACACTGCTACTTTAAATCACATT  
CTTACTATAATTCATAATAATGAGCTATGCTCTTGTTTCAAGGACCTCATATGCATATCAAACCC  
TGAGA

>chr2\_159370554\_159370754

TTTGTTCCTGCTAGACAGCTCTTTCAGCATCATAATGGCCACAAAACCTAACACCATCTGGTGTA  
TAAATGTGTTTTTCATTGAAAACACAGATATGTTGTCATATCTTCCCTCAGTTTGTTCATGCTCC  
cattgaacaacacttttgaatacctactgtgttttcaggcactttctggatctgctgagaatgca  
gtggc

>chr2\_232316956\_232317156

TCAGAACTAGAGACAGGTACTAGGGAAGACTGGGAATTTGACTTCAGTCCCTAATCGCAAGCCT  
CAATGTCTCTTTCTGGCCCTGCAGGGTAACCCACCTTACATCtttttttttttttttttttttga

gacagtgttgctgccccaggctggagtgcgatggcgcgatctcggtcactgcagcctctgcctcc  
tgggt

>chr3\_33467396\_33467596

AACTATGAATGCTATGTGGTTCATCTAAAGGATGGCATTAAACAACCCCTATCTCGGGGTGGGAAG  
TGGGGGAGGGCGGCAGGGCAGCTCTGAatatatatatatatatatatatatatatatatatatat  
atataGCACTTTAAAACTTCTTTTAAAACTTTAAGGTCCAGATTCTTTCTATAAAAAAAAAGCA  
AGTCA

>chr3\_51129360\_51129560

ggggagccatgaggtactgagcctgacgaactgtgcaactctggcccagatagtgcgcttgcctcca  
tggtctttgcaaccgcgagaccaggagattccctctgggtgcctaacacatcagagacctgggttt  
caagcaciaaaactgggtagctgtttgagcaggcaccaaactagctgcaggagtttgtttttctcc  
ataac

>chr4\_154191750\_154191950

TCTACAGTTACCTTTGAGAGAAAATAATCTCTTGTGCTTCTGCCAGACATTGAAAAACAGAATC  
ATGAGTTGCAAATAATTTACTTTTATTTCAAACCATTATAAGCAAGAGAAAGCAATCCAGTAAC  
CTGATTCGTTTACACAAGAGATGGAGCATTAAATAAGAAATGTTAAGTTGAAAAATCTTTTAAAC  
TTCCC

>chr5\_142658407\_142658607

CATCCCATGCTAATTATCCAGCACTTCATAGACACAAATCATGTTAGTTTTCTTTTGGGGTGGC  
CAAGGTTTCTCCCATAGTTTTAGGCATTTGGATATATATACCCCAAAGTGTTATGTCCTAAGT  
GCCTCAGTTCTGCTTGTATAGTATCCACAGAATACCTACAAACACTAAAAATACTTTTCAGGAT  
TTGTT

>chr6\_65970079\_65970279

atctcgtgagaactcactcactatcagaacagcatgggggaaactgtctttatgatgcaattacc  
tccacctggtctctcccttgacatgtgggaattataagaattataattcaagatgagatttgtgt  
ggggagacaaagcttaaccatatcaCTCAATTTCAAAGACCTGCCTGCAGATGCCTGCTCTACTT  
TACCA

>chr7\_153869067\_153869267

AGATGTACACACTGGGATGCAGAGAGGTGATCTGACACAAGGACAGCCCATGGTCAAGCCCCTTT  
GACTTCTGTCTGCTGTTGAAAAGGATGTGCCTCCCTTTCACTGAGCCTCATTGCAATACTTGTAT  
AGATTCTGTGCcctcctcctccttcttctcttcttcttcttcttcttcttcttcttcttcttctt  
atgaa

>chr8\_6945190\_6945390

cccaggctagtcttgaacttctgtgtgcacccacctcagcctccTGCATTTTTAGGAGGCCCTC  
TTGTAGGGATTTTGATCCAGAGGACTGGGTGCCTCATGTCTCCTCCCAtctctctcttcttctctg  
tctctgtcctctctctcttcttcttcttcttcttcttcttcttcttcttcttcttcttcttcttctg  
ATCCC

>chr9\_138189579\_138189779

TGAGGAGAGCAACTCTCCGTCTCTAGCCCCTGGACTAGAACCCTGGATCTGCTGACACCATTGG  
GGCCTGTCAGACACCTGCCAATCCTGACGTTGGATGAGAAAAGGCTGCTAAGACCACGGGGTCCC  
ACCGGTGGAGACAGCCATGCCACAGGTGGGAAGGGGCTTGCCAAGGCTACCAAGCAGATAGCAA  
CGGCC

>chr10\_107812810\_107813010

AAGCCACTTGGTATCACTTAGGTGACTGTAGCACTGATTCCTATGCCATTTTGATTAGTAATGCA

TATTGATCTCCAGGACCAGGCTGAACACGGATCGAATGACATATGCACAATAGCACAGGACTGCG  
CTCATTTAGCAACAAATCGCCTTTGGAAAGTCCCTTTATGTTTATTCTCCTCATTTTGGTTCCAT  
TTGAT

>chr11\_120481590\_120481790

TTGATTGGAACTCTCTGACCAGGTTCTGTATTGGTGCTCAGGCCTTTTACATGAgaaccacaga  
gtctcagaatgtcagcgcaggaagagccttgaaagaacgtccggcccatgtcctgtcgttttcaa  
caggaaaccaaggcccagtgagcggacaagacttTGATTGGATTGACAGCTCGAGGCAGAACCA  
GGAGA

>chr15\_83254945\_83255145

AATGTTAATCTAATTTGATTGGAAGGTTGAAGCATTTTTTTTCAGATACAAAAAAAAAAAAAGCC  
ACTAGCTATCAATTTTCAGTTTATATCCTTTGCCCTCTTAAAGAATGAGTTCTTATACTGTGGCT  
TTTCCTTACATCAATAAGCCAGTACTTATTGTCTCTAGAAAGAGAAATACCCATAAAGAAAGA  
ATACT

>chr16\_31646899\_31647099

gcaccactccccagcctcgctgccaccttgagtttgatctcagactgctatgctagcaatcag  
cgagactcagtggcgtaggacctctgagccaggtgtgggatataatctcctgggtgcgcccgtt  
ttaaagcccatcggaaaagcgcagattgggggtgggagtgacctgattttccaggtgctgtctgt  
cacc

>chr17\_34970487\_34970687

aataaatgtgagctttTCAATGCgatgatgacgatgacaatgatgacgatgatgatgaAAAGAGG  
CTTTTGAAGCTAAAAAAAAATGCCCAAGAACGCCTCCTCCTCCCCTCACCTGCTCTCTGGGGG  
AAGGGCAAGTCCCAGCTCATTACTGGTGGGGGCTGCGTAGGGGGAGGTGTCAGATTGGAATCACT  
CCTGG

>chr18\_67889020\_67889220

GAAAGCAGGTGCTTTGTAGACAACCTGGTCTTAATGAGCACACATCAATAGGTTTGGCTGAAAACC  
TTGTAATACCAAAGAGCAGAATACTTAAATCAAATATGAAAGTACCATAGTTGTTTCAGTAAATTA  
AGGCACACTGCCCCGAAACTGTGCACTTTTCTGTTGTCTTAAAATGTTGTGCCAAGTGGCACAAT  
GCTCA

>chr19\_37283160\_37283360

GAGGAGTCCTTGAGAAGAGCCTCTCCAGCCAGGACCAGGTAAGGGAATCTGTGCACTTGGCCAGA  
CCCAGAACACACAGTGGCAGGGACCTGACAGCCACACTCTTACCCCATAGAATCTCCACCACTGA  
CACACAGATCAGGATGCGTCACCATGAGAGATGACACCGCAAATCTGGCTCTCACGGATTGATTC  
CATA

>chr20\_53883793\_53883993

gcagagaaagtctcctgggaagagtgtagccatgagctatgagcaccaccacaggcctggaaattg  
gaagttgatgcaccattctgatgcaggacaggcaaccctgggcttagcccaggaaagttcttag  
cttcaccaggaagaatgcaagggtgagcaggtgggtgtagacagcaacttttattgatgcagc  
agtgc

>chr1\_149657176\_149657376

ttgtaaaatagtatgataatgtaaagaacaagtttcaggccaaatttcttgttctcccaagaaaa  
ttgtttctttttctttgagccatctcatttgaatttgctccaattgccttaaagacaccctagtg  
gggagtcctttgggatgctcgcctttgtcccatgtctaacaaggatctctactacaccagaag  
tttt

>chr1\_208271977\_208272177

CAGATCAATGGGTAATGAATTTGCAGGGAAACTGGAGAATGACTATGCCCTTTACAATAGGCATT  
GCCATACGTTTGGCTATAAACATAAAGTCTCCTTACTGGATTTAAAGTCTGATCAATTTACAGATA  
CTTGTGCAAGCGTGAATGGAGCACACCCACACAGGTGCATGCACTGTATTCCCTCTCCCCATGCC  
CCTGG

>chr2\_168244154\_168244354

ACTTGCATATTTTCATTTTAAATACACCTATTTACTAGTGAAATCATAGAATGTGCTTATTTACGT  
GCATTTAATTTAGGTTAAATAACTAAGCCATAACAATACTGTGGTCATATTTTGTGGAAAAGGA  
AAAAAAAATAGTTAGTGTAAATCTCTACTGCCAGTCTCCACAAAAGGCTAAAAAGTTGCCTTA  
CTTTG

>chr2\_237310861\_237311061

TGATCAAGTCACCTCCTGGCTCAAGTGTCCCCAGGGGCTTCCACAGCCCCCTGAGACCACGGGT  
TACCAGCTCACTCAGAGGACACACCTCCTGCCCTGCTGACTCTCATCTGTGGTCTATTCCCCTG  
TGAATCCACCACGTCTTTTTTTCAGCTTTGCATTTTCAGCTTTGCATTTTTTCAGCTTTGCATTTTGC  
TTTGA

>chr3\_123052310\_123052510

CAGCAAGAGTGCTGGGGGCTCCACGCGGCTGCTGGGCAGGGGACAAAGGCCCTGGCACTGGAGGG  
CCGAGGACGCTGCCTCTTTCTGCTGCTATCCTCCTTCTGTGCTCTAACGGCACCCCTCCCCAGCC  
CAGGAGGAAGGCAGGGGAGGGGCGTGAGGCCTGGGTGTGTGCCTCAGGAGGGTGCGGGACAGGGG  
GCCAG

>chr4\_55383843\_55384043

TGAGAGCAACACATTGTTCACTGAAAATCTACCAGTTTAGCTTCCCTGCCTTCCCTGCCACAGAG  
AGAAAGAAGGGAGGGAAAAAAGAATGATTTGCAAAGCAGCATTAAATATTATTCTGAGGCCAGGTG  
AATTGGGATGTGGGTGAGATCTTGAGATGAAAGTTTCAGCTGCAAGAAAATGAAAAAGCAGCCATA  
ATCTC

>chr4\_88855376\_88855576

ttttctaggatatccacttggatATAAAATAAAATATTTCCCTGTCATATGCAAAACAACTTTCATT  
TCATTCTTGAGTGGTGCTTACTTCTGATCACAATTGTGTATAAcagagatgtccaatcttttagc  
ttccctgggccacactgaaagaagagttgtcttgggccacacataaaacacactaacactaatga  
tagct

>chr5\_126629501\_126629701

ccaggatgaACCTGGTAAAGCTGACGTCAGATCACATTTGGAGAAACTGGCTTACAGCATAAAG  
TCTCACCTCCTTACCGCTATAACAAGACCACCTTTGCAGCacttctcagggttatcttctgctt  
ctctgggtccccagctctccagctcccactgatcttgatcttgttactatctcaagaatacgtgt  
gcact

>chr5\_150053207\_150053407

GATTATTATTTACAGCTGAGATGAAGTTTGGACAGGGGAGAGCTTGAAAGGGATACATTTACCAT  
TCTGCACTGAGGGCCTGAAAACAAACCATAGGAATCAAGACAGGAGCTTGGCACTGGGGGAAGGC  
CTTGGGCTGAGGAGTGCATGTTAACTGCATTGGCTTCCCTGGTCTGGTGTATTTTTGAATATGC  
TCCTC

>chr6\_160554210\_160554410

GCCTGTGACAGCCTCTGCTGCTAGGCACCGTCCCACACATGGTTTGGGGGGTCTGACCCGGGGCC  
ACATCCACGCTCCAACACCACCcgcagcccctccacccacgactcccctgacttccctttccct  
tttcatTTTTgttcccgttacacgtatcacgctetaacataggattgcattctcttatctgtgat  
gtgga



>chr7\_2505474\_2505674

TTATCTGtgctgatttttcacttcttgttctgaccaggagacgcctggctcccatgatgcacaac  
ttacttatttgttcaatcccagtgttcgttgtttcagaattgctaagatgtaccctgggagaac  
caaacctactaactagagtccagtgtttgtacacagttggttttgtcctgagcttcaggatgtag  
acaaa

>chr7\_23148475\_23148675

gtagcgctacttcatccttgtggtatatagtatcccattgaatgaatatagcacaatttatccat  
tctatcattatgaacatttgggttatttctagtttggaaactattaagactagtactactttgaac  
atttttgtacactttgtacatgccttttgggtatgcatatgtatgtattaatatttgtgttgggaa  
atacc

>chr7\_51424706\_51424906

TTGCATAAATCAACCTCATCTCTTCCCGCCCCCAGGCATACTAAATCACACTGTGATGGCGAGTC  
TTCTCCCTTTTGGCCGCTGTGCTAACTCAGGTGGAACCTGCCCCCTAATGTGCCACACTGGGTTA  
CTCATTCCTGGGCATGGTGACCTCTGGGTTGGAAACTTTCTTTGGAAATGTGCTGCCCTTCGTA  
CGCTC

>chr8\_90163684\_90163884

GTTAGCTGGTTGCTCAGCTCAGGCATttttttatgtggccattcttagtcttcataacccatagc  
atctccctaagtcccttgatgaactccaactttctccctcaaacactcttatcaaaatatagctg  
ttatttattgttttggtccttttctgtggggaaataattgtcaggaccctgggtcagtcaccttt  
ctgat

>chr9\_126138579\_126138779

ATGTAGAGGCTTTGATGGGGAATCCTGGGAGCCTGTGACTGGAGACACCAGGGAGGTTTGTGGG  
CTCCCCGAAGCCTGGGCCGAGGCTCGCAGGGACAAGCTGTCATAACAGCCCCCTCGGCCCCCCCTGC  
CACCTGCCCCCGCAGGTGGGCCCCAGTGGATTCTGACCTTGCTATTGTGGCAGGGGGCCGCTCA  
GCCTG

>chr9\_139033979\_139034179

CTACAGCCCAGGGCCCCGCCCTCCCTGCAGACCGGACAGCAACGCCACCTCTGGGAGACTCGTGGG  
GACGGGGCCCAGGGCAGGCTCACAGTGGGAGGCTGGCAGCACCTACCCGGGGCAGGGCCCTCCTCC  
TGCCACTACCACGTCAGGCATCACTGAGAAGGAGGCAAGGCCTAGAGCAGTCGGCACCTCTGCA  
GAGCT

>chr11\_66307424\_66307624

agcccgtgctgggtgacaagaacgcactggtaaactgggcagacgcagccccCTACTTGGGATAC  
GGCttcattcctgcatcacagacttggtagcacctcctcagccctggaggcggtgccaggcact  
agagggtgtctctgcccttggggagctcacagACATTAAAGAGGCCATTCTTggctggatgpcggt  
ggctc

>chr13\_114271399\_114271599

AACTTGGACTAGCACCCGTGTGTTCTCAGGAGCGGGTCTGCTGGAGGCCAGCCACGTCAGGCA  
CAGTAGGTGTGTGATTTGTGCAACGGAGGCCTCTGATAACTGCCAGAGTAGATAGCTTTTGTGTG  
GGAGCTGCCTCAGCCTGCATTCCAGGAGCTCAGGTTTCTGAGTCTGAATGGAGTCTGGAGAGAG  
CAATG

>chr14\_76876047\_76876247

AGGGCCCCCTAATTTGGTTTGCAAATACATTAGCCAAACAAGCTGAGGGGGCTCCTTTGGGGAG  
AGGGTTTTTGGGGGATGGGGATGGGAGATGGTGGGAAGGCTGAGGAAATGAAGAAGGGAAGGGTT  
TTCTGTGCAGGTCCTGGAGTATAAACCGTACATGCGATTGCCAAGGCTGTGCATGTCTCATGGTT

TTACC

>chr15\_86775396\_86775596

ATGTTATGTCTTTTGCATAAGTCCATAGAAGAGCTTAAAAGGTTTAAAGCTAAAGGGATACTACCT  
GTCCCTCGTCGCCCCCATCCCTGTCCCTTGGGACGGTCAGACCCAGTAGGTTGGGCGGGCCTTGG  
GCTGAGCCGCAGACAGTAAAGCATATCGTTCCCTCTTCCGGCCATGTGGTGGTGCTGTTCTTTTAG  
TTATC

>chr15\_97133396\_97133596

CACAATTACCTTTTTTAAAATGCCAATTAACCCATTTCAGTGCTGTTTGGCATACTGTGAGCAGTCA  
GTGACAGCAATATTGCACACTGTAGTCCTACAGTAAGGCATACACATACAGAAGCACACACATGT  
GCACATGCACACACATGATTAGGACTggagtgagggagggagggagaaaggaagggaggtagggg  
aggag

>chr15\_99143477\_99143677

GCCCCGTATTTCTTGAGCTGGAGAGAATTGGGCATACAGGTATGTTTACAAAGACTGAGCTCGC  
GGAAGAGGTTTTTAAAAGACCAAAAAAAAAAGTCTCAATGGGAAAAGATAccttctgcctgcctccg  
ccacctcctgctcctcctcctcctcctcctcTCAGCTCATGCGCATGTacacacacacatacacacac  
acaca

>chr17\_76671205\_76671405

AAATGAAACAGGTTATCCGGAACCTCTGTCCCGATAAACCTTCCTCACAGTTTTGGTTATTAGGTA  
TTTAGCTCAAGGAAAATGCTGACTTTCTACTTTAAAGCCCAACAAGAAGCTTGGATTCTGAAGGAG  
GAAAATAACGTAAGCGTCCAGTCAGCTCTCTCCTCCTCGGCGCTCCGCAGGCACTTGGGATGG  
AAAAG

>chr18\_55115202\_55115402

gccacacagtggagtcatatggcactggccaggggtgagaactgacagtaggcactgaccctgac  
tctggcctttttcaatcagttgctttgcTTTATTTCTGGTTTTATTCCAGAGAAAAGAGATAGGA  
GAGTCCTTTTGGTCAATGATTGAGCACAACTCACATCTCTTTGGGTTTTCGAGTAAAATGGTCCTT  
GACTT

>chrX\_1474800\_1475000

CCAGTCCCTTGAAAAGCTGAACGCCTGGTACTTCAGAGAACAAGGGTGGTTCTGAAGGCTGCT  
CCCAGGACAGTGGGGCTCCGAGGGTGCAACCCCAAGGCTCACTCCTCCCAGTGCCCCAACGCGG  
CTCAGTCCTGTGTCTCTGCCTGTAGAGTTTCTTTGTTCCCTCTCCTTCCTTCCCTGGTGTFTTTCTCTC  
CCGCT

>chrX\_2161000\_2161200

ggacccccctttcctgtagcaTCTTCAGGTGCAGCCGTGAATCAGAGAAGCAGAAGGGGCTTACCT  
TGAAAAGCAACCAGCCGAGAAGCTTCTTCGCCAGACGGGTGGCCAGAACACGTGCTTGTAGACG  
TCCGTGTTGACCACCCCGGGTCCACCACGTTGGCGGTACAGTGGCTTCCCTCAGCCGCCAGCAG  
CCGCT

>chr1\_7945413\_7945613

CCCATGGGTCTGGGAGGTGGACAATGGCGGCCCAAACGGAGGTTTCATGCCAGCCTCAGGGAGTA  
TGGGATACTTCTCCCAGGAAGGACAGGAGATGGCCCCGGTATAGGCCGGCCTTAAGACAGGACA  
AGGCAGGGAACCGGACTCGGGATCCTTAAGGTTACCTCCAGCACAACCCACCCAGCCTCCACTC  
CTGCT

>chr2\_205395555\_205395755

CTTAATGAAGGGTCTTCAGCTAAGAGTGCTTGAAACATATTCCTCCCCACCGAGGAGAGCATC  
AGCCAGCGAGATGATGAAGTCTTCTGGTGAGGACACCTCCTAGGGACTAGACAGGCTAACTTCTT

GGTCCCATCCTCTTTTCCCTCACTCTACCACTCAGAGATTTCTGTAAACCCTTTCTTCTCTTAGC  
TTTGC

>chr2\_233470556\_233470756

cgtaggttgcagtgaaaccgagattgcgccactgcactccagcctggccgacagagcgagactcca  
tatcaaaaaaaaaaaaaaaaaaaaaTCGGTTCTGAGCAAATTTGAGTCACTGACAAGGCGGCGGT  
ATCCAGCAGAGGGCGCGCCAGGCGCCAGCACCAGGCCCGAGGACGCCTGGCTCATCCCCAGGCCG  
GCTTC

>chr2\_236923461\_236923661

ATGGAACTAAACCGTGTGGTAGCCTGCGAAATATATACAGCAGCAGCACCAACACTGAAGGTA  
ACGCCCTCCGCACCTCCACCCGCCACACCTCCACCTGCCCTTCCCCTCTCATCCCCGCCCCG  
CCTTCTTTCCAACACAGGCATGGAAATGCAATTTGCCCAAAGCCGCATGCTCCCTTATTGTGTT  
TGCAG

>chr3\_107384710\_107384910

GTCGTTGAGTCTGTCTGTATCTGGTGTGAAGGCAAGTTGTTTCTTCTTTCTATTGTGGTTCC  
CTGCTTGGGACACCTCAACTCCAGGTGAATGGTGTGAGTGCAGCCTGACTTCTTTCTTGCACCT  
CATGTAGTCTTTCCATTAATACTATTGCAGGGAATTGCTAAACCACTTTCAAGGAGTTATTGACTC  
CAGAT

>chr4\_4398499\_4398699

CAGTAAGCCCCTGGTGTGTTTCAAGATGCATTTCTTAAATATTTATGAAGAGTGATGCCGTTTCC  
TTGGCATTTCAGCAGTGGGGGTGGGGTCTTCCCGTGGGGGTGGTATTGGAGACCCGAAGGTGT  
GTGTGGACGCCCCCTCACCTTTAGCTATGCGAGCATCTGTAGGATCCTGGGGCTGTGGTTGCAG  
AGCCC

>chr4\_109838151\_109838351

AAGGAAAAGTTTAAATGGTAAatcaataactgtctaaaggccttacatctatttactccctaac  
tctcattgactctattaggtaggcactgccattgtctccctttacagatgagaaactgaggccag  
agaattccaaggactttgccaaaattcacacagcctctgagtgaagaCTCATGCTCTTAGCAAC  
TTACT

>chr5\_57246643\_57246843

ttggatgcaattgtggcagaaagaacaatgagtaacaactgtaactcaatgccagctgcagtgg  
ctgaaattcatcctattaacctctcacttgTTTTTccttgagaaggaaggccccaggaatcctg  
gaggagctgttgctgaatgtgtatgaagaaagaacctgtgtggcacaagggtgAGCTGTGAT  
AGCAA

>chr7\_51945506\_51945706

ATAGTTATGCAAATATGCTGTTTTTCATACACGCGTATACAAAGCCTTGGTAATTTAGGACTCATG  
ATGAGTGTGCAGGCTGCAGGCTCTACTTGAGTTTTAGAGATGTACTATTCATCTGCTTTTACAGA  
GTCAAAGGAGGAGCAGATCACAGACGTGAAGCCATCTCATCACTGAGTAAAGATGAAGACCATG  
CCAGG

>chr7\_107577164\_107577364

CATTCTTGAATGTGAAAGGATTTGCAGAAGTATTAATACCTTAACTATTCAAAGAACCCCTTC  
CAAGAAAAGGCCAGGGGATTAATACTACTAAGGAGGGAAAAAaatacaggaaatggatac  
cattctgatacaactactgccattcactctgtgggaccttgctatgtctcttaggttctctgtg  
cccaa

>chr9\_138949179\_138949379

CAGGGATGGCTCAGAGGAAGAGAATGACTCGAAGGGTGGGGAGGGACAGCTGGGGCTGGGGTGGC

TCCTGTTGAGCCCCAGATCCGCCCTATGGCCCCACCCAGCCAGCAGACCCACTGGGTCCACACA  
CTGTGGGATGCTCCCTCACACCACAAAACATTCTAGAAGGTTTCCAAAGAATTAAGCTGTGTTTC  
GAAAA

>chr10\_49525194\_49525394

TTGAAGATGGTTAAAAACAATGAATGAtttttctttttaagacaggggtctccctctgttgccc  
aggctggagtgacagtgggtgatcgtagatcactgcagccttaaactcctgggttcaagtgaatc  
ttcctgtctcagcctccagcctcccagtagctgggactcggctggcgaatttttaagtttttg  
taaag

>chr12\_19119933\_19120133

TGCCCCAAGGCCCATTTTATAGAGACAGACTGCAGGCCAGGCTAAATGAGAGATTCTAAACT  
CACAGGGTAGAGCCAGCATACTGCATTTGGTATCCAGGTAACAGGTAACAATGGCTAACAATGTG  
ATCCTGAGAAAGGGACAAAAGCCTCCTCCCCATTTCTAACCTTGCTGCTTGAGACCTCAGGGTG  
GGTAC

>chr14\_73447447\_73447647

ttgtattttagtagagacagggtttcaccatagtcctcgatctgctgacctcgtgatccacctgc  
ctcggcctccccaagtgtctgggattacagcgtaagccaccgtgcccggccgagaatttattaa  
tttattaaatgcaactcccagggcctatctcagacctactgaattagaaactgtggagggggc  
acca

>chr15\_51115508\_51115708

CCTGGATGGGGCCAGTTTATGGGTGTCTCCACTGACAGATTTGAGCAGTTTGAATTTGATAGGGA  
ATGGAGATTGGATGACTTTCCAGAGTAAGCAAGTGATATTCGAAAAAGCATGTTTCAGAATAATA  
TAAGTAGAAACCTAAACATTCTCTTATGATCTTTGCAATTACTGCCAGCTCTTTCTTATCTACAT  
CAAGG

>chr15\_101587477\_101587677

CCATCGTGACAGTAGCAGCCTGTGCTAGCGGGGAGGGAGATGGGTAAATAGCGCCAGAAGGGTGC  
ACTGATTGAAGGAGTGGGCGCAGGCGCTGGTGTCTCCTACGTTCCCATTCCTCTGCCCTCCCTTTG  
AACTCTGTGTGCCGCTGTCTTCTCAAGGGAGGGTCATGGAGCACTAGCATCGTGGGAGGCTGAGC  
TGACA

>chr16\_7268999\_7269199

TGGTCACAAGAGAAGAAGAGGTGAGAAGGGCTCGGAGCCAGACAAAGCACGCCTTTGTAAATGAA  
TGTGGAGTTGGCCACCAGCAGTCTTCATTATCCCCGTCATTGCAGGCAGCTGAGCTGGCTTTGTG  
TCAGCCCTGCTCGGAGTAGCCTTGTTAATTCACCCCCATGAAAATGGAAGTTTCATACACATTGA  
CATAA

>chr17\_73840805\_73841005

GAAGCTGACCTGGGCCCGGGGGGTTCTCACCCCACTTCCTCGAGTGCGTCCAGACgtggggcgg  
ggcgggggtgggggtgggggtgtgggtggCGCCAGGGTGGGGCTCCCAAGAGGCGTCTCCCTGGAGG  
ACAGCCAGTTGCTCAGCCTGCCTGGCCCCACAGGTGACATTCCTTGAGATGACGGGGCCAAGCT  
GTGCT

>chr21\_34178530\_34178730

ttctgtactgagtacagctcagctctagcacagtgaggaatgagggacagatggcactatttgac  
cctttctcaagaacagactggggctaccctggattttgctctctgggtcatcaagcaacagggag  
cccatggccaaggtaagggacagtcagcatccagtgggggctggggacagaagcagatgaaagg  
accat

>chrX\_137369334\_137369534

aatthttgtggagagtaaatagagaagattcatgaatthtagcactacacctggatcatagcagtaag  
ggthttcaataaatgthtagctcCCTCTCTCTTTCTGCTCCCTCTCCCAGGCATCCATACAGCCTC  
ACCACCTTTCAGGCAGCCCTGTTAAAATTGCTGGAGCAAATATTTTCATTTTCAGGCTGTCTCCCT  
CAGCA

>chr8\_33343858\_33344058

ccaggagthcgattccagcctaggcaataaagtggagactccatctctacaaaaataaaaaatta  
gctgggcgcggtggtgthtcgctgaggtcccagthtacttcgaaggctgaggcagaaggactactt  
gagccgaaaagtccgaggctgcagtgagctatgatggcaccactgcactccagcctgggtgacag  
agaga

>chr9\_133872379\_133872579

CCTCCCCGCTTGGCACTTGCAGTTGCTTCTTCAGTTGTACCCTTCCCCTTCCCCTCCGGAGACC  
CTCTCCAACGCCACTCCTCTCCTTCCCGAATCAGCTCTCTCTGCCGGTGCTAAGGACAGCTCCCT  
GAACCCCTGAAGGAAATATTCAGGGGTCCCTGCTCCCAGAGCAATCCCAGACACAGGTGATCCTG  
GGTA

>chr1\_29609813\_29610013

CCCATAGTCCCTTCTCCCATAGCCCCCTCCCCATGGTCCCACCCCTCCCATAGCCAGCCCTCCTG  
ACCCAGGCTCCTTCCCACAGAGCACTACCCCTTCTGAGCCTTCTTTCTCAGGCTCCTCCTTT  
CTATCCAGGTCCCAGTCTAGTCTCTGCCCTTCTGAGGCCCTGCCTTCTATCTTAGATGCTTC  
TCTTC

>chr4\_120589152\_120589352

AAGCAGATGAGCTGGAGGTTAAAGTGGCAGCGTGCTGTAACCAAGCCTCCAAATCAAGCCCTTGG  
AGCCGCTATAAGCAGAGCTAGCTGTGCAAAGCTGACTCCACATATGATTGCCCTGCCAGCCTTGT  
GAAGGAGACGAGGCCTGCCTGGCCAAATCAGACACCACAGAGTGCAGTTCAAGGAGAAAGATGAG  
CCCTT

>chr9\_75829180\_75829380

ATAGTTCAGATCTCCGACACTGTGTCATTTTCATAGAGCTCACACACTCTGACCAGAAGGAAAGA  
TGGGTTCCGGGAAGCTGAGGCTACTGAAGATTATCTGAATTCTGGTTGAAAGGCCAAAagaaat  
gtgtattatggaaaagtgatgctcttaaagcaggaagtgggtctctgggccatttacttgttgtgt  
gactt

>chr7\_54256106\_54256306

aagaatthgaagtaagggatgatgattcctgttatacgtaatthtatcctgggtacaaatgtacaag  
gtaaagaggtcaagcaagatgcaggcagagaaaacaattaggagaatgcaataacagtcccaatg  
atagatgaggttacttgaacATAAACAGCACTGGTGAGGAGGAGGCCTCGGAGGAAAATATCTA  
AGTAC

>chr2\_50449496\_50449696

AATCATTCTATGGAGCTCAGTTTCCTAAGAAATAATGAGACCAATTTGCTTTTATATGAAAACAC  
TCCAGTTTGTGATATCTTcatacactgctgggtgggagtgthcaacagtacaatgthtcttagagga  
caactcagcaatatatacattggthtcggcttgatgaatthgtacataaaaaatgctthttacac  
atgtg

>chr10\_43746194\_43746394

AAAGCACATGAGGGGCATTGTGGCTCCGCTGTTTTCCACCTGTCACCTGGTCAATGGCGGCTTC  
CCAGCTGGAAGGGGCAGAGAGGGCTGGAGGCTTGGGAGTGGTGGTCTGGGGAACAAGGCTCAAT  
GGACCCAGGCACTGACCCGCAACCCTGCTGAAGCCAGAGACACCTGGGTGGAGGTGGAGACGTGC  
AGGCA

>chr4\_65714605\_65714805  
tgggtgtggtgggggagggcggggcgggatggtttgggtttggggatgaaactgctcttcctcagat  
tatcaggcattagattctcacaaggagcacacaacctagataaacttgcattgcaattcacaata  
aggttcatgctcctatgacaatctaattgtcactgctgatttgacaggaggtggagctcaggtggt  
aatgt

>chr13\_111894199\_111894399  
TTTAACATTGAAAAGGACTTTTCTGATACGTCTGTGACAGATCTTATTTTCATCTTATTTAGCTCA  
AGATCTCATTATGCTTGGCTGGCTTCCCCTGTTGTTCTGGAGGACAGGCCTGGTTTCGAGTAGCG  
TCTCTGGGGTGTGGTGGCTGGCATCACGGTTTACCTCTGCTCACCAGACCTTTGACATTTGTGTT  
CGACG

>chr17\_47953401\_47953601  
GCTCTCAGGAGTGTGCACTTCCACCCCTGATACAGCCAGGATGAGCTGTGGCTGGGGCAGACA  
GAGCCACAGATCAAAGCACTGGCCTCCTAGGTGAGACGGGACCTCAGCTGTAGGCAAAGCGGGA  
TGTTTCCCAGTTAGAATTCACAGATGAGCAATCTGATCCCTCACcttttccctcccttttccctt  
tattc

>chr1\_42220013\_42220213  
acaagagcacaggagacaaggatcagattgcaatgctgttgggaggctatcacaacaatagtctt  
tgcattgctagagatagcagcaagtgagccaaggtaattggcaatggaggtgagaagtggtaactt  
ttgagtacaatttgaaaataCGTTTGGGCTTTTCTGCAGAGCGATGCCTGCCTGCCGTACGTGTG  
GCTGC

>chr10\_34151194\_34151394  
ctTACGGCCGATATGCTAACCTTGAATATCTAACAGACTTTTAAGAAATTCTTAGGTTTATGCAG  
ACTATCATAGCCCCATAACACATAACACAGCCCCATAGGCCAACACGTCACCTACATTCTGCTCA  
TCAAATAACACTGATGGAGCTATCGGTCATGCTGGAGCCAGCGTGGACTCCTGCTGGTTTCCATA  
TCGGC

>chr9\_99018379\_99018579  
ATTAGTGACAAAGGCCCACTTTATTGAAATCTGTCTCTGTGGTTTCAGTCAAATGATTCATACT  
GTTATtttctttaattgtggtaaaatacacataacaaaatctaccaccttaacaaaaatgtggaa  
tactttacaaatttctgtgtcatccttgggaactcatgctaattgttctctgtatggttccaattt  
tagta

>chr11\_27761624\_27761824  
tatacaagatcatacaaccagtaggcagcagacctgggtgttcaaagtcagggctttctaattccc  
agatctgtttgcattgaccactcATTCCTAGCCATATTGTGAGCCCAGAGAGATGCATTTTGAGA  
AAAAAAAAATGCCATGTCCTCTCCCTTACTTTATTTCTATATTTCTAACACCAGTTTAAATGGAG  
GTCTC

>chr11\_73209552\_73209752  
ggagggggcaccagcactgggttgagtgcccactgtctaagccgtttgagctccttggggagg  
ggcagcaaccagcattggaactcgcaactgcctgacatgctaagctccctgggcagggtaagggc  
agcaccatttctatagctccaggctgtgtttttcccctgctggagcccgggaggctgaatggct  
tggtc

>chrX\_152532406\_152532606  
AGGTGAATTGAGTGAAAATCAGTGAGGGCCCCTTCTCGATGACAGAAGCGAAAAACACAGGCTCC  
TTCACCAGGGCGGGCCATTGTGTTCCCTATTGTCTACCAAACGGCTCTGCTCTCCAGGTCGGAGAG  
CGGTGCAATTGTTCACTAATTGCATCCTCTACTGATGCATGCAATTAGTGAACAGAATAAGGGGA

AAACT

&gt;chr7\_17961275\_17961475

acctggggaagtaggggattttaaaatcccactaccagcttacgccacatacaaaattaaatca  
aaatagctaggtatgtgagccatgcatcagaatttCCAATGTTTCAGGAAAGCTGATATAAGAgca  
ttgttagtttgtgaagttccccagatgattgcaatatgcagttacttttgagaaccaccgATGTA  
TGAC

&gt;chr20\_24474800\_24475000

gcATGGCCGAGGACTGGATCACTGAGTGCAGATTGAGAAGCACAGCAGGGCAGTATGTGTGGGAC  
TTGTGGTGTAAAGGAAGATAGTGAAGGATGGAGGATTGAGCGCACAGTGTGAGGAAAGCTGCTGG  
GGGCATGAGCAGGGAGGAATGCTGAGAAGAGTGGCCTTAGAACACACAGCTAGAGGAGCTGGCG  
GGTCC

&gt;chr1\_204803577\_204803777

TCATCCCCTCCCGGCTCCTGCTGCTCTCTCCTCCAGGAAGCAGCTGTCTTAGCATCTGccttct  
cctccttcactgctcctcctcactcctcccctccCGGGCTGGCCCAGCCCCTCCTGAAAGGCCT  
CCCTGGCAGCCCCTCTCCCCGTTATTGTGATGCTAATCATGTTGTTATTTTTTTTTTGAGATCCAG  
AAAGA

&gt;chr4\_189353606\_189353806

GTGAGAATATCACAGCCTATTCTAAAACTGCTGAATCATTGAGTGCAtatagttggagaagtgg  
gtggagcagaacagcataagaagagagtaaagaagtgtgcagggtcagattacatgaggccttat  
agggcgtgggacagagtttacttcatcttaaatgcagtgagaagtcattggaggatttcaggtg  
cggaa

&gt;chr15\_42373108\_42373308

CCCCACACAAAGTGTCCCTCTGGTGGCCACTCTGCCCCGCTATGGCCCCTGATTGTCTCTGCCAC  
CCAGTCCCCCAGGATCCTCACCACGTAGAGCCAGAGATGCCACTGAAGTAGGTCACACAGTCTAG  
GAGGCCCAGCTTCTGCAAGGCCAATAGGTGGCCGTAGAGTGAGGTCATGGCCCCGGGCACCTCCTC  
CTGTG

&gt;chr15\_86407996\_86408196

AGAAAAATCTAGAAGCTAGTTTTTTTTCTGGCTCCTCCTCCCGCTCTCCTTCTAAGGTAGTCCACT  
CCCTCCTCTTTCTCACTGTCTCTGATCGTGACCCTCCCACACCTGCTTTCAAAGCTTTGTCTGTG  
AACCAATTAGAGTTTTGAAAAGCTGGTATCAGAAGTGCCAGTATCATTTTTTATGAGACTTCATG  
AATAA

&gt;chr8\_56822046\_56822246

tatctagtcacccgctgatggacatttaggttggttgcataatctttgctattctgaatagtgtc  
caataaacatacaagcacttggttcttttaaatgtaatgatatcttttcttttgagtagataccca  
gcagtgagattgctgcatcaatggtagttccagttttcattatttgagaaatctccatactgttt  
tccac

&gt;chrX\_104195544\_104195744

cgccccgctaattctggtgcgctgttttttaagcccgtttgaaaagcgcagtatgttggtggggag  
tgacctgattttccaggtgcccgtctgtcacccttttctttgactaggaaagggaaactccctgacc  
ccttgcgcttcccagtgaggcaatgcctcgccctgcttcggctcgctcaggggtgcgctgcacca  
ctgac

&gt;chr19\_54675788\_54675988

GGGTCTCGGTACCGAAGGGTGGCAGCACTGGGCAGCTCGTTCAGCACAGAAGACAGCGATGGGCC  
TGGGGAGGAGCAGGGGGCTGGGAagaccgggagctctgggcccctaattcctcctccctcagacca

ggaaaccaggtccccggcccctcctccctcagaccaggagtcaggcccccggtcctcctccc  
tcaga

>chr6\_83789481\_83789681

AAAATCATTGTCATTAAATGAAGAATGATAGCTACAAATAAAGATACTTTGAGAAAGGTACTTTC  
TGATGAAAATTTATGTTTTCAAATAAGCTGGAAAGAAATACATGGTGGGATAGTTAACAGTTAGTT  
ATTCTCATCTTGCCTTTCACCTCTCTAATCATTCTGAATAGCAATGCATTCATTTTTATCATT  
TTCTC

>chr2\_191942955\_191943155

TATTTGCCTGTTTTTCTCACAGTTGCAGGAATATTTCTATGCCGATCATTAGATACTACCTTTC  
AACATTTCTCAGTTGTGTTGTACTTTTTTCATTTTTCTTTCTTACTTGAACCTTCTTCTACCTT  
CCTTTTCAGATTCAGTTTCCCCATACTTTGTATGGTTAAATTACTCACTTTTTCTTCTTTGTTA  
AGAGC

>chr4\_101467177\_101467377

CACAGGGCAGCGACAGTGAGAGATGAAGGCAACATCAGTGTGCGCCAGAGTTttgcaactccaca  
cgcagtcacatcatggaccaacaactgcagcatcacctaggagctgtagaagtagacagactctcag  
atccccccccagattcctgagttggaatctgtaatttgataagattctcaggtacattaaagttc  
gaaaa

>chr1\_57098812\_57099012

GGAAATGAGTATGGGTCACTTGGGTTCATAGAGAACAGAGAGCAGAATTTTGTAAAACATCAGG  
AAAAATTCAGTTCCTGCAACATTTCCATTTGTGCGCAAGGCTAGCATGGTCTGGGAAAAAAGCA  
TAATTTTTCAAAGTAAAGTTATTATTTTATTTGGGATTTAGTTTATGAAGACAATATTGTGTTT  
CTCTA

>chr12\_39786733\_39786933

aataaaataaagacaataaaaataaaatTCAGATTGTGGGAAAATATATACTATAAAATGAGCCATA  
CTAGATGTTTACATAAAACAAGGATCCACATTTTAAAAGAAAATGTTTCTGAAAATAAATAGCATT  
CTAAGGAAATTGCTGtgtaggaaccagtttttgggtcttctgaagatccttcagccctacctgc  
atcac

>chr16\_14805899\_14806099

TCTAAAGCCCCAGGGTTGCTAAGGGAGGGCCAGACCGAAGAAGGTTTGGTGGAAAGCAGAACCT  
TTGTCTCCCTCTAATTGCTCCTAAGCCTCACGCTCCCTTGCCCTGCCTGTCTGTTGCTTCCCTG  
ATCTTCTCCGTGACCTGTAGCTAAACCTTCCACCAGCGCTTGAGAACTTAATTTGAACCGGATCC  
TTTCC

>chr10\_72834194\_72834394

ATGGGCTTTTCCCACTGTTGGCCCCTAAGCTGGTTAACAGAGCCACAGCAGAAACTGTGCCTGAC  
CCTGCACTGACAAATTCTGGAAACTCCACAGCCTCGGAAGGTGGTCAAACAACAAAACCCTCCT  
TCCAGCCCCAGGGCATTCAAGATACTATCTCTGTGGCTTTCTGCTCATGATTTTCATTACAAATA  
AGCAG

>chr13\_114214799\_114214999

TCGCACAGGTCTGGACGGGGTCGCGAAGGTCTGGACAGGGTCGTGGGTCTGGACAGGGTCGCAGG  
TCTGGACGGGGTTGCGCAGGTTTTGAGATGGGCATTTCTCCCCCAGCATCTCAGGGTGTCTTG  
GCAGCCCTACCCCAGGACAAACCTAGTTTCTGTGTTCTGGTGTGTTTTACAAAAGCCTAA  
GCAGC

>chr6\_158470612\_158470812

CGGTTAGACAAGTCCAATAATAACAACCTGTTTtaggggatggaggaccagcctgaggccctgag



CCCAGGGAAGCAGCTGTGGCAAGCTGAGCCTGGTCATGGTGTCCCTGAGGCTCTGCAGGTATGGA  
 CATGCCTCTGCTGGTATGCATGCAGCTCTGCAGGTGGGGACACGGCTCTGCAGGTGGGGACATGG  
 CTCTG

>chr3\_8155600\_8155800

cctgcacgtacacatccagatgatcggttcctgccttaactgatgacattccaccacaaaagaag  
 tgaanaatggcctgttcctgacttaactgatgacattgtcttgtgaaattccttctcctggctcat  
 cctggctcaaaagctccccactgagcaccttgtgatcccactctgcccgcagagaaacaaacc  
 ccacc

>chr9\_94108779\_94108979

tataataaactggtaatagtaaataaagcactttcctgagtttcgtgagatgctctagcaaatCC  
 CATTCTGAGACCAATTATGACGTCtttttttctaacaccacttctgacaccaaagtctgaggg  
 tttccacaccaattcttcaacatcaagcgggtatccaacaattcagttaaattctgccaccatcc  
 aaaat

>chr1\_110040877\_110041077

CGGGCAGGCGTGCTGACAGCCGGCAGTTTGCCTGGGCTGTGCCATCTGATGTCTATTTCCAGCCC  
 TGGGAGGAAGGGGAGTCATTTATATTCTGCAGGAGGAAGGGGCCCCAGCTGTGCCTTTCTGAC  
 CAGCAGCCTGGAGGGCAGGGGCACAGAGCAGAGAGGAGGGCACTGGTGGTCTCCTGCTTAGCCT  
 GGTCT

>chr3\_13204400\_13204600

CCCCCTTATCCCTTTAGCTCCCCTCTTGCAGCCCAAGTGCACCATCCCCAGCTAGTCCCCTC  
 ACCTGGGCTTACCCCTGCACACAGTCCTTCTGGGACCTCTCTCTCTCCAGTTCCCCTTCTGAG  
 CATGCCTCTGCTTCCCTGCGAGACCCTGCCTCTCACTCCCTGGACTCTGGTTCCCTGGAGCCCAAC  
 TCCCT

>chr1\_14730813\_14731013

tgcttatctgtgtctgcagctcgatTTTTcaggctgctctttgtagaaaagaaatgatttgggt  
 gctgctTTTTgttgaaagggaaattccactgcggactctgttgccttactatctgcctaataa  
 tttctttctatctcccgtatcagtgctggaacaacaaggtagctggcaggcctaacaacaac  
 aaaaa

>chr10\_88614820\_88615020

ctgggattacaggcacctgcctccacgcccagctaattattgtatTTTTtagtagagacagggttt  
 cacatcaggtctcgaactcctgacatcaggtgatcaacctgctgggattacaggcgtgagccacc  
 acaccctgcGTGCTAAGTTTTTAAACCAGAGAGGCTTCAGGTTTCAGACACACAGAAGCATAAT  
 TCTGG

>chr13\_62659799\_62659999

AGTTTCTTTCTCTTAAACCACACCTAAGCACAGATTACATTGTTAATGCAGTGATGAAACAGAAA  
 AACATGATTCCCCTACCCCTAGAAGAATTTAAGTATTTCTCCTTTTAAAGTAAATGTCAATCT  
 TACTACTATTTCTCGTTTCTCTTAAACTTTCTTTGAGGTGTATGAGTTCATACGGAACCTTTA  
 AGGTT

### (3) 1,484 non-enhancers in S<sup>-</sup>

>chrX\_2970600\_2970800

cagtcacatctgtaatcacaatacgttgggaggctgaggcaggaggatcacttgagtccaggagt  
 tgaggctgcagtgagctgtgatcacaccactgcactctagtgtgggtgacagtgagacctgtct  
 caaaaaaaaaaaaaaaaaagaTACATTCAAAGAAGTCAAAATAAAACAGTATAAAACCTATCTCCC

TGATT

>chrX\_6179400\_6179600

actttgaagaagtcaagtcacatcaagatgagagacccaactgtcaagctgctaaggatgacctagga  
tgggggactggctcctcgtctggcagcaagaaatggccagaactctcagtgctacagcccaagta  
acttaattctgcaacaacctggctaagcttagaaccagattcttccttttttgaatctccagata  
agaac

>chrX\_11003079\_11003279

tcggcctcccaaagtgtgggattataggcatgagctactgcacccggccCAAAATGTTTATAAC  
AATATAGAAATACATTATAtttctaactcatgcaaaggtgccttatgagcaagcaacaatcctgC  
CCCAAGGTCTGCCTGGTCTCTGGAAGGCCATGGAGGTAATGgcaggagggcagctcttgaatca  
gatga

>chrX\_22042679\_22042879

TGGGAGCtgtatcaatcatgttttttattttctatatattttatgatgtgttgacatcttggcct  
tgcagaccaggggaaggtctgtccctcccagggttagctaattcctagagatagtaactgacttg  
cctgtgagcatgcctttgatatgcaaatcaaccaatccacgttcatataccccccacttcctttt  
accag

>chrX\_23280479\_23280679

tacagcaaatagccttggcagatacagtgtttccctccagagcaaagggAGGAGCCATGGGAGAG  
AGGGTGGGGTGTGGAGAAGAACCCTCAGAAGAGAGAGATTTATGAGAAGGGTCTGGAAAGCCAAT  
CTAAGGAAAGTAGGACTTTTTAAGTACAATGGATGCTTCAAAGTTGACTTTTTGCTTATTTGCTT  
TTAAA

>chrX\_31634879\_31635079

GTGGAGGAGGGTAAAAAATAGTAAGAGTGTGAATGAGAGTGGAGGTAAGGGGCTAGTGAGAAAGG  
AATGGTCATAAAGAATTAGGGAGGCAGAATCTACAGACCTTAAAAATGAACTTGAAAGTGAGGCA  
AGTAAGTGGGAGATTTAGAAATGACTATATGATCTGAACTCTCTGACTGAAAAGATGGTACCGGG  
ATGAA

>chrX\_33563079\_33563279

aaaaaattggaagaagcaactgttataaccagatgtgcagatatcaatgtaacataaaaaggaagg  
aaatatgcaacaccaataaatacagataattctccagcaacagagtccaataagaaaggtacgaa  
atgcctagaaaatcattcaaaaataatgatattaaggaagctcaatgagatgcaaggggaacacaga  
taaac

>chrX\_35196679\_35196879

TGAAATTTGGTATGCCCAAGTAAAAAATAGTACCTTTCCAAGTTAATTTAGTCTTTCTCTAAAC  
GTTTCTAAATAAACATTTATTTGCTGTCAATTTGTCTATGAAATGCTATCCTGAGTCTCAGTATAT  
AATGAAATAAACCTTGAACATGGATTCCTAACTAGGTCTACTGTAATGTAGGTATTTCTTTTTTA  
CTACA

>chrX\_36223479\_36223679

TACAAATTTGTTAAAGAGTGGTAATCTGATAAAGATAATAAGTGCACCTTTGAGGAAGGTGAGCTC  
TTGCTTTGAGAGTGAACCTGGTTATGGAAGTTGTGCTGAAGTTGAGGCTTAGGCTGGCTCTAAAA  
GAAAGGAAAAATGTTGATGGCTAGAGGTTATCAGAGGAGAAGAATGTGTTATTGGTGAGTAACTT  
ATCTT

>chrX\_36884279\_36884479

GTTCTTTCACCAGAGTAGCAGGAAGAAATTCTCTTTTACAACCTTAAAGATATGACTGTCAGCTA  
AAAGAAGATGGGCACAATTTGTGAGTAATTGATTGTTGTTCCAGCAAACAAGAGGCATTTCTCATT

AAAGTATTTTCAGGAAAGTAAATCTGAATGTATAAAAAGTTGAagaaaaaatggcaagtaagggct  
caaaa

>chrX\_37379685\_37379885

AATGAATATTTCTGCCAAGTAAAAAATGTTTAAACATTATCCCAGCTTAGTAAGGGGAAAGGCAGG  
GGATAAGGGTGGGTAGCAGGTAGAACCCTTCATTAGAGTGAGATGGCTCCCTGAGGAAAACAACCTG  
CAACTGTGTTTTTCGAGTTCTATTCTCAAttttttgtttcttttttgagaaagagcctggctct  
gtgac

>chrX\_42545456\_42545656

GGGAAATGTTAATCTAAATGAAATCTTTCATTTTGCAAAATCAACAGAATttaattcagcaaata  
tttattgaacaaactatatgtcaaaaaactgtttttgaagcccaggaaaaggatagagaagga  
aatcaagatcctaagaggtgaagcaacttgaaagttgacacatcaaatgaatggactgagacaag  
gctag

>chrX\_53396675\_53396875

aagaaagctgtagtcccactcccatccaccagcaaaggccaagaggggaagcttagacttccacac  
ttgctagctgtaagtgggtgccctctccctttctgctggggtgggtgtcagagaaggtgacag  
gcagctggaactcccactcccactagcagtaactaggaaaccctctggtgaggtatcaataga  
gagtg

>chrX\_55956475\_55956675

cctcttttattttgctgagcagtggtttgtagttctccttcaagaggtccttcatatcccttgta  
agttggattcctacgttttttattatctttgtagcaattgtgaataggagtttactcatgattt  
ggctctctgtttgtctgttattgttgataggaatgcttgtgatttttgcacattgattttttat  
cctga

>chrX\_57973875\_57974075

gattcttcctatccatgagcatggaatgttcttccatttgtttgtgtcctcttttatttcggtga  
gcagtggtttgtagttctccttgaagaggtccttcacattccttgaagttggattcctaggtat  
tttattctctttgaagcacttgtgaatgggagttcactcatgatttggctttctgtttatctggt  
attgt

>chrX\_58186875\_58187075

ctggctagccatgtgcagaaaaatgaaactggactccttccttacaccttatacaaaaaatcaact  
caagatggatcaaagacttaaaagtaagacctaggaccataaaaattctagaagaaaacctagggc  
aataccattcaggatacaggcatgggtaaaaacttcatgactaaaacaccaaagcaatggcaat  
gaaag

>chrX\_62432075\_62432275

tagcacctgcttgggtctggggaaatggtaataataaccagtgatccacagtcagtgca  
ctgccctcaggggtctccacattgcggtccatgctattttcaggatttgggaggacagaggagct  
tcccactgtaaggatccttggcagttcacagcaagaatgaggactatcaaaatacttcaacttac  
ccttt

>chrX\_84579144\_84579344

tgggtcaattttggaatatgtgccatgtgcagatgagaagaatgtatagtctgttgttttgagg  
ggagagttctgtagctatctgttaggtccattttgtcaagtgttgatttaaggttccgaatatct  
ttgttagttttctgtcttctgatatgtctaatactctcagtgaggagtgtagcagtcctccactgt  
tattg

>chrX\_88141744\_88141944

cttcttgggaaggctgttcatgtatttgaagggatttgggtgttgcacatctaaattttcggtcac

tgtagccatatgtgcattagggatcaccccaagcccagaaacattgtgTTTTTtacagactcata  
gaaatactgccttggtagTTTTaattaacatccagaataattctctggattaccaggcagagact  
cttgt

>chrX\_95273944\_95274144

taaaactcccacaacaaaacataaggggaagtcttcatgacactggcttggcaatgacttcttc  
gatatgaaataaagcacaggcaactaaaacaaaaatagatcagtgccatttcatcatgaaaaaa  
gcctctgaacaccaaagaaaaacaatcaacagagtgaaaagacaacctacagaatggaaaaaaatg  
tttga

>chrX\_106473344\_106473544

ttcaccagttgctcaagctaaaaacctaataatcagccatcattcctcttctttatacctcatg  
tctaataccatcagcaagtattactggctgtaccttcaaaatataattctaaatccatctaatttct  
attaccactgcaattgctatcatgttactaacgatcatcatctctatctggaccattctgacgag  
tctct

>chrX\_107912144\_107912344

TTGTGGTCCATACCAGAAGTATTGCTTTGGTTCTGTGCATATGATCAGCAAATCTCACCAGGCACA  
ATTAATAAATAATTATCTTCTATAGGAACTGGGCAATCAAAATTTATCTCCAACATCACAGCATGATC  
AAATTGACTAGTGATCTCTTCATACCAACCTCATGTCTATACCTCATTTGTCTTGTGTTCACTGC  
TCTAG

>chrX\_110463944\_110464144

CCTCATTTTGTGCATTCACTTTGAAGAAAAAGGTTTCTCAAAGATGCACACTCCCTCTTCATAGT  
GTTGTGTTTGTTTTTAAGTTAGAGAGTAGTCCCTCTTGCATTCAAACCTCCTTCAAACTCCTTA  
CCCAATGTGATGTTTTTCACTTGCATTGTCATTAGATGTCCAGAAAAAAAAAAGATGTCAAATG  
TTTTT

>chrX\_121572119\_121572319

ctttctgagttctttgtactgttttatagttttcttgcattctcattgagtttctttaaatacaa  
tattttaaattatttattcttggattattttaaacaattattttaaattattgtgggtacatagtc  
agtgtatatatttattggagtagatgagatgttttgatacaggcactcaatgtataataatcacat  
cataa

>chrX\_125765719\_125765919

caggatgcttttggctgattatctggaattttctacatagataaactgtcagctctgaacaagga  
cagatttatttattccttcttgatctatataaatttgatttacttttcttgtcttactgtcttag  
ccaggacttaactaaaatggtgaataaaagtagtgagagcaacaacctttcttttttcatggtc  
ttgg

>chrX\_128412519\_128412719

ggTTTTTccaatgttattttctagaagtttatagtttcaggTTTTTaaatttaagtctttaatcc  
atcttgagttgatttttgtataagattagagatgaggaccagtttcattctcctacaagcggct  
agccaattatcctagcatgatttgttgaaaaggggtgctcttccccactttatgtttttgtttgc  
tttgt

>chrX\_134773134\_134773334

GCTGCTGCCATATTAGTAAGTGCTGGTGGAAACAGTTGCGATGACATTATCGGGTGCTGGTTGGCC  
ATTTTTTGTCTTCTTTCATGGACATTGTGAGTGACAGTAGCATCTGGAAACAAAATGAAGAGGT  
TAATTTTTAGTTAAGAACATTATGTGAAGCCACAGGTATATCCCTTTTATGCTCAGTTTCTAGA  
AAACT

>chrX\_136699334\_136699534

GTGCTTACTATGCCTCCTGTTTCATAAGTCAGGTTTGCACCAACTGCATGGCAAGGCAGTGATTAA  
GTA CTTTCTTCTTTTTTTGAAACTTTAGCAATAGAACAGCAAGCCACCTGCCTTCCTATTTTTTCAT  
ATATCCATCATCCATCATAGGAGGCAGCTTGGGGCAATGcagctattctcaaacttttcttgtct  
cagga

>chrX\_137172334\_137172534

tcatctcaatacacacagaaaaaacatttgacaaaatccagcatccctttatgattaaaaccctc  
agcaaaaatcagcatacaaggacataccttaaggtaataaaaccggtctatgacgaaccacaa  
tcaatattatactgaatggggaaaagttgaaagagttcaccttcaggactggaacaagacaagca  
tgccc

>chrX\_152839206\_152839406

CAGCTGGGCCTTCCTCCTGGGTCTCTTTAGTCCGACCACCCGACACTGACTCGCCGCGCCAGG  
TCAGTTCAGCTTGCTGGTGTGGGAGCACAGGTCTAGGCTCACACGGTCTGGGCATGAGTGTGC  
ACACAAGGTGGGAGGCAATTTTCATGAAACTTGCCAGCTGCAAGCAGTTCTGGCTTGCCAACACA  
CACAC

>chrX\_154950006\_154950206

gggcctccctggggcctgggggatctcatcctaccttgaaggaaggacacaggcctgtctggtt  
ttgccacctgctgattgtagagaccatgggtcttgagcaagcataggcattagccaggtagtagt  
tatagcaggccttgggtcaagaccccgctgctgtactggcttcaggtctgaccagtgagtcacag  
tgggtg

>chr13\_23321400\_23321600

GAAAGTTTGTCTTGTAATTTCTTTCAACACAATGACTTTTACCCCATTTCTTAAGCAATTTAA  
ACACCTAACAGGATTGCAAACTTTCTGTTCATCTTCACTAGGCCATTGGTTAATTTCTGAAAGT  
CTACAGAAAAATAAATTTAAAAAGCAATGCACCTTCTAATTATAAGATGTGAGTTCTGCCAGGTT  
ACCC

>chr13\_32440600\_32440800

tttttaaatacccatacctgatactcttactaataatctttattaatattctcttgaacttga  
tattacagatttgcaaacagtgctttgtaagactttctaattggatcaaagacaacttttattag  
tgtttgatgtgtaattctagaagactgtaagtttcttagacctcaaggccctattcttcgaaca  
tgctt

>chr13\_34766000\_34766200

aataataaaaaaaaaGGCCAAAAAAAAAAAAAAAAAGTCAATGTTGTaaagaagaaactgttctagatt  
aaaagaaagtaaggaaactgggtaataaatgcaatgatgatgctgaactggaccaagaagaaa  
agtacatatttttattttgcttcagtgacatcagtgagataattggggaaacctgaatatggtt  
tatag

>chr13\_36005800\_36006000

TTTTTGCAGCTCTAATTCAGTATTATTAATAATGGATAAAATTCATTTTTCTCAGGTTGCTGTG  
GGCAGCGGGAATTATTTCAATGAATATTTGAGCATTATTTAATCATTTTTCCACCAATCC  
AAGTGGGCAATATTTTATACTTCTTAATTCAGCCTACTAAGAAACCATGGTCATTAATTTGTA  
CTATT

>chr13\_48780599\_48780799

ctagaactagaaatatcgtgtgaccagcaatcctgttactggatatatacccaaaggattgtaa  
atcatgctgctataaagacacatgcacatgatggttactgtggcactattcccaatggcaaaga  
tttggaaaccaaccaaagtgtccatcaatgatagactggattaagaaaatgtggctcaaatactcc  
atgga

>chr13\_57229799\_57229999

ctaccttggcctcccaaagtgctgggattacaggtgtgagtcaccgcgcccagctctgatcttttc  
actgtttacaaaatcttgccttttccagagtgctcacatagttaaaatcctacagtatgcaacctt  
tcagatctgcttatttttacttagtaaatatgcatttatgttatctctatatattttctcagccta  
gctca

>chr13\_60195799\_60195999

tgacacgtcacatgaagagaatcaaggacaaaagccataaaatcatctcaatcgatgctgaaagc  
atctcataaaatttaaccttccttcatcataaaatctctcaataagctagatatagaaggaaagt  
acagcaacacaataaaggcacaactaatgtcagagcaaatgggggaaggctaaaagctttttctc  
taaga

>chr13\_69082799\_69082999

ttttttcttactgagtttttgagttccttgtagattctgaaAAGTTCCTTAGAGAAATAAAACA  
CACTAGTTGGCAATTTtatatatgtgagtggtgtgtatataaacacacatatataattatatata  
catatttaatatatgcaaattcataattgcatataATTAGGATATAATCTTTCCAAGAAATGCAT  
AAACA

>chr13\_76555399\_76555599

TTTACAAAATATTTTTATGAAGTCTGGAGTGAAATATTGCAAATATTAGTGGTTATGCCTGCTGG  
AATGGGAAGTGAAGCTTAGTATGGTGATTTCAAATTTCTTCATTATGTATATTTTCATTTTAAA  
ATGTCTACGATGAATATGAGTAAAAATTATAAAAATTCAAGTATTCAATCAAACCTGGATGCAA  
GTAGT

>chr13\_81662199\_81662399

cacaacatggataatctggagatgataagtgaaataagccagaaactcaaagataatgcattatc  
tcatgtatatgtggaatctgggaaacaaaaaattcagatatacagagataaagaataaaacct  
ggttaccaggagtggaaggtgggaggaaggggtgggaaatgaggagatggaggtcaaaatagtag  
atatg

>chr13\_82726599\_82726799

atccatattttccttattattcatccattgatggacacttaggttatttctacatattggctatt  
gtgaataatgctgaaataaacatagaagtgcataagaaatgcaacatatcttaaagcttgattt  
cgatttgtttgaatatataaccagtagctggattgctagttctattttgtatttttaaggaact  
ttcta

>chr13\_84798599\_84798799

tctatttatCACAGAGCCCTTTTCTCCCACCACCAAGAACTGTAGGACATAATAAATATCCTTAT  
TGCTTCTCTAAGAGACTGGGTAGATTTTTTTTTAAGCCTTCTATCTCTGGTTTTCAAATGGACCAAC  
TTCTAAGTCTCCAGTTTTCTTATTCTTAATCTCAGCCAAGTATGAAAGCATATATCCACCCCT  
GAGTG

>chr13\_88750799\_88750999

TCTTAGAAGCTTTTACTTTTATTTAGGATATGTTTTATAGCACACgagaacataactataatgaac  
tccctaagtgttatctcccagtttcaacaatttcaactGCCTGTTAGATATCAGATAGTTCAGTA  
AACACTAACATAATTTAAATATTATAAGAATAGTGCTTTTTACTTATTATTTATTTAAACTATAG  
TTTCT

>chr13\_92325599\_92325799

AAAAATTTAGTTATTCTAGTACTAAATATTATTTTGTGACTGATTATCTTTTCTGAACATCTAT  
ACTAACCATCGATGACATAACAACCTGGTTGTTCACTTTGTGCTTCATAGTTTGTGCTATGGCCCC  
TATTAGAAGAATATATTAAAAACAGCTCAGAGGAAACAAGAGCTCGCCCATCCTTATGCAAAGAG

AGAGA

&gt;chr13\_92764999\_92765199

tgtatataatgtatgtgtgAAAAATCTGAGCATAGTATAGGTTGAAAAGCCAGTAGGGAAA  
TGTTTTATATTCAAGTATAGAAAAGTATAATTAAGACTATTCCTGATAGCTAAGGAGAAAGGAGAA  
GGGTTTTTACATGAAAGCATTATGCCTATTTACATAAAAGGTGCCGCAAACACTGATTCACACT  
GATTA

&gt;chr13\_104093399\_104093599

TTGGTATGCCTGCTGCGATATCTTCTGTTACCCTAAAAACACTGCTCTGAGAGCCACCTGTGTTG  
GTGCCTACTCCTCCATGGGAGTTTGGGTCAGAGGGCACAATTCTGCTTATTCATGTGCCAACATAA  
TGAAACCTCAATAGGAACCTAATATTCATGTCCCAAAGACTGAACCTGAACTGACTGATTGCTTCC  
CCACA

&gt;chr13\_108353599\_108353799

caaatagataaagcaaatgtggtatataataacaatgaaataactattcagcttttataaaggag  
atcctgccatttgccacacacatgactggacctagaagatatttgccacacacatgactggacctaga  
gatattaagtgaataagccagatatccaagaaaatattgcataatctcacttcaatttggtat  
catta

&gt;chr13\_109173199\_109173399

TGCTTCTCTTCTGAGTCAGTAGAGGATTGGAATTAATTACAATTTGGGCTAAGGGGCCTCAAATG  
AGTCTGTGCAATGGGTGATTCCCATCTTCCACGTGTTCTTTCTCCACGTCCCATCTCTCTTT  
ttccttcttctccttctccttctccttctccttctccttctccttctccttctccttctccttctcctt  
atctt

&gt;chr13\_112035799\_112035999

ttcattctcgatcttccagcctttccttctcggtttgttataggaggaacttttaccaaatgcctg  
ggatctctgATATTGAGTCCATGTCTGATGCTTGGTTTCTGTGGGTGAGGTTTGGCTGGCTGGCGG  
GTGATTGTGTAGGGACTTCACTATTTTGTCAGAAGACCCCTAACCTCTCTTGTCTTTCTTGTGG  
GCATC

&gt;chr12\_7669133\_7669333

gggtgcagcacaccagcatggcacatgtatacatagcctaactaacctgcacattgtgcacatgtac  
cctaaaacataaagtataataataataataataataataataataataataataataataaagatcttct  
ccaaaagcataattgatcaatcatctcatagtttaggttttgagggtccctcagtgctggtgatgaac  
ctggt

&gt;chr12\_17599133\_17599333

aggagccccagtgaaacctggactccaaatatatttctccttgcttctattgtggtgtagcaacc  
caatttctccatggtaattttaaacaagtcttctaagcaaacatagtaattgtttttctgcatttt  
gtttcattggcaagatgagcttaacatggccatcagtcfaatctcagcttccagtttacagtcaag  
cataa

&gt;chr12\_25798933\_25799133

TGGATGAGGACAAATCCTGGGTGGTTATTGCATTGTATCTAATAATTCTGATGATAGGATTGAA  
GTCTTGTGTTGGCTATTGACAGTGTAGAGGTCAAAAATAAATCACAATACCTGGGttaattt  
tttttaataaataGTAAACCCCAAGCTATGAGGGATGGCATTGTTCAAGATGGTATGGGGTGGAA  
AGACG

&gt;chr12\_34217133\_34217333

AATTCCACAGTGCTGACCATCACCCTCCTACTAAAGTCTGAGGcctactggagatctctgcttag  
atgtttcataaatacctcaaactcagtggtgtctaaaatctaagccataattgcccctaataatagga

atctcactgacttatctgattttgccaatggtaactccagttcacccacaataggcaatttagag  
taatc

>chr12\_60761533\_60761733

tacccaaagcaatttacagattcaatgcaatctctatcaaaaataccaatgatggtttttcacagaa  
atataaaaaaatcttaaaatgtatgagacacaaaaaagcctcaatagctaaagcaattctg  
agtaaaaagaccaaagctggagggcatcacattacctgactacaaatatattacaaggttatagta  
aaca

>chr12\_74299133\_74299333

aaagcatttaaccattctatttatgatggacatttggagtctttccagttgtgcattctatataa  
cgctgcttggacaatcttaataaatctctcatgcaaatagttctgttggaaacagacctagg  
aatggaagtactgattcataTTACATAGATATACTGGTGGCTGGGTGAATTAATAGTCCACTAAA  
AGCAT

>chr12\_82013469\_82013669

TTTAGAGTTTCTCCAGTTAGATAAAATGCAAACACATTGGAAAATGTAAGCTTTAGCTACTCAG  
CTGTTAAGGTTTAATATTCCTGATACTCAGCTGCAAAGGTTTAATATTCACGATACTAAATATTC  
ACAATATTTCTTGTGGTCACAAAACAAAATAAATCTGACCATTTAAGAAGAAAGGCaggccaggc  
gcggt

>chr12\_82618069\_82618269

acacttctcaaaagaagacatttatgcagccaaaaaacacatgaaaaagtgttcatcatcactgg  
ccatcagagaaatgcaaatcaaaaccacaatgagataccatctcacaccagttagaatggcgatc  
attaaaaagtcaggaaacaacaggtgctggagaggatgtggagaaataggaacacttttacactg  
ttggt

>chr12\_82738069\_82738269

acatatgaaatcaaattaaaatgcagtaattagggtagaccctaattcaatgactgggtgtcctaa  
taaaaagaaaatctgggacagagacatacacacaggaagaataacatgtgaagactggagtta  
tgatgccataagccaaaggaattaccagagccagaagagaatcctggaaccaatctttcctgtg  
acgca

>chr12\_83334869\_83335069

GGGAACATGGTGTACAAATGTTAATATCCAGATTAAAAAGAGCCAAGTGTAGTTGCATTGTGA  
TATTTAGGAGGGAGATCTATCTTTCTTATAttttttttaaaagatgggatctcactgtgttgcca  
ggctagatttgaactgctgggctcaagtgatcttctctcctcagcctccccagtagctgggacta  
taggc

>chr12\_84686669\_84686869

AGTCTGTATTTGaaataaaaaagttaaaaataaaaaagttgagatttaaaaaattaatacaatt  
taatGTTAGCTTTTCAAGAAGAAGGAATAAATCATTGTCTTCTTCCACTACATAATAGGTATG  
CAATGTGAATGCTAATGATAAAATAGACTAGACAAGTGTGACTCTAAAATAAAATAGAAAGAAAA  
AACAG

>chr12\_99985869\_99986069

TACTTTAAGACTGTCATTCTGTTTCATACTAATATAATGGTGACTTTATTACTAGAAACAAGATTT  
TCTCTATCTGGGTAATTTTAGTTCTGTTTATTGCAAAAATTGTAATGACTAGAACCATCTTGG  
TGGTTGATCTAAAGCACACGAAATGCTCTTTATTTTGCCAGCTACAAACATGTTAATATGAAATG  
CATTC

>chr11\_21024024\_21024224

TATTAGAAAGCTTTAATCAGAAAAATAAAGATAGATAGGATACTGCAGAGCAAGGGTTAGCTACA



CTTAGGGACTTCCTCAGCCAGAAAAGTCTCCATGGGCCTGCATTAAACCTGCCTCTACATTCCAT  
CCAACAACAGTCTACCCTGCTCCATCCAAAAATATGGCAGAAAGAGGTTCTCTTGTCTAGGGTT  
CTGCT

>chr11\_21050624\_21050824

GAGAAGTACACAGATTTTTGCTTCTTTGTAACCGTCTTGTGGGTGGTAAGGATGTGCTTGCTC  
TGCTATACTTTAATCGTATTCATTAAAGGGGGAAGAGAAAGGGGTTTTGTCTCAACAAATGAc  
caaggactcaatacagaagtatggagttcttcttaggccatatttagttcactttaacaAGCTT  
AAATT

>chr11\_23761224\_23761424

gtcaccttataatatacattgtacccattaagtattttctcattctttatccctcccactctcta  
gccctccaagtctcctgtacctatcattccacactctccatccatgtgtaacttatttagctccc  
atgataagtgagaacattgatatttgactttctgagttgtttcacttaagataatggcctccagt  
ttcat

>chr11\_26455824\_26456024

cctttctcatttctgattgtgtttacatgaatcatctctcttttcttctttattagtctagctat  
tggcctatgtacatcattaatTTTTTCAAAAAcaaaactcctggattcgttgatcttttgaatga  
tttgttatctctcgttcttcagtttacctctgggttttgggtatttcttgtcttctgctagcttgg  
gggtt

>chr11\_26616424\_26616624

atacttccctcagggggccaggtttctcccccttgaagagtatattgtggcctggcgggactgca  
gaagaatataagttgtttcttcttagcgtatgagggtaaaattgggtcccaattctccagaatac  
atcttaggggcatttttgccttggggggaatgtttcccatctgaaaaagaacatagggatgcca  
ggatc

>chr11\_38876624\_38876824

TATTAATATATTATTTAAGAAATACAATTTTACACAGAGCTAAATTTCTTTTAAACAAATATTTG  
CCTAATAGGACTCATATGCCTTTCTCTGGGGAAGGGCATTATTTTATTCATTATTTACCTTTGTA  
TTCTGCACAAAAATTTGGTCATACTAGTCAGGGAAGCTATTATTTGATGATATAGAGGATTGCA  
TAATA

>chr11\_84184952\_84185152

ATCTAGGTAAAACTCATTTATGTTATTCACTATTGGTGAGCTATGGATTTTCAGCTGTGTTTCTC  
AGAGAGGTGGTAAAAGTAGTTCATTCTCTATTTATGTCATCCTGCCACAATGAGCATGCAGTTG  
TTCAATTCATACCTTCCATGTGGGGTATGACTCTGAAAACCTCCTCTTTCATACTTATTTGTTTC  
TCTCA

>chr11\_97385790\_97385990

TTGCATCCTGATCTATATCATACCAAATGATGTGGGCTCTGCCTGCAGGAAAATTGCTGAGGTTT  
GCAGGGGACCAGGAGAAGTTTTAGGTTTTGAAAAGAGAAGGAGTGTGGAGTAGGTAGACAGAGGA  
GATTGTGGGAGTGAGAATGAACAAGTAAAACATTTTCTGGCTTTAACAAGGGACCGTATAGCCG  
CATCC

>chr11\_104854590\_104854790

aggagatgggtacaatcctaccacattccaagaggcagGcccatgagatgagtacctttatttct  
ccattttacagaagaaaatcagacttcaggctgtagaataacctctgaaatcacacaattggaa  
agtagccaagctggaattttcatcaatgtgtctaagaaatgaaaacctatgctttttggcacagc  
atctc

>chr11\_127045790\_127045990

atcaaaacccaaggagggggtcgtgggaacccccgattcaatagctgtttggtcacaagtgtagg  
gacaagctggacgtggtcatgtgtctgtagctcccagctatctgggaggctgaggtgagatgatca  
cttgagccccggagtttgacactagcctggacaacacagcaagaccctatctctaaaaaaaaga  
aTACA

>chr10\_44933994\_44934194

GCCCAACCTTCCCTGGAATGAGTCTTCGGTTGAGGGGGCCTGACGTCAGCGCCCTGCAGGGTTCA  
TCTGTGTCACCTAAAAGTGTCCGGCTGCTTGGCCTGGCTATTTCTGCTGAATGCACAAAAATACA  
TTTTGCCTTTTCTCCTTCCAAGTTGCAGTTTCTTTTCTGCAAATGAAGCAGAAGAAAAGTGCTGC  
ATTGA

>chr10\_48880194\_48880394

GATCACTGGACACCTATTTTAGCCTTGGGATTTATATCACAAATCCCTAAGACTTCATATTTCCA  
GAAAAGAAATTCAAACCTAAAGCTCACAATTACTATTATTATGGTAATCCTGATAAGATGTACATT  
TTAACTAAAAGAAGTTCCCACTATTTTTTTTTCTTTCTACTTTTCAATAATCCTTGGGACCTTAGT  
AGGAG

>chr10\_57439794\_57439994

GTAAAAAGAATAATTAATAATTTATTTTACCAAGTTTAAACTGAGATACCAATTTAGTCTTCAC  
TAATTTACTGGTTTTTTTATTTATTTTCACTGCAAAAGGGGTAAAAATCCCTACATTGCTCCTTCA  
TAGAAAAGATTGTACATGCCCAACTCAATATATAGGGAAAATGTTTTTAGGCTGTATAAAAGCAAGA  
TACTA

>chr10\_58686594\_58686794

TATTCTAATGTATAGTTATCAATATTTAAAGTCAGTAAGGCATTTACAAGTTGATTTTATAAACA  
ATATGATTATAGAATCATAGATTTTACAACCTATTACAAAAGATGCTTGGGAAAAAGAAAGAGA  
CTATGTAAACTACCTCTCTATAATACAGACAACAAGAACAATGAGGAAAAAGAAACAGGAATGCA  
AGGAA

>chr10\_64659794\_64659994

ACCTTACCCAGAAACAGTTGAATTAGCAGATGGATTTTGACAGGACCTGCATAATTAAAGTTTCC  
ACTGCAGCTTTAGAACTCCTGTTCTGAAACCCATTTTGTGTCAGCCAATGCTAAAGAATGTTTTTT  
TGGCTCTGGAATATAAAATCCAAATAGTCCCAGAGGAGAAGCTGCCTCTCAGCCTGGACACCCTC  
AAGAA

>chr10\_84261420\_84261620

ccatgtctttctctcttttctctctcagatctgtgcttaaggttgaccatgcatcaagtgttg  
ttgaccatatttttagtaactcaattctctaaccacaaaaatgggacttttttagttctatgttct  
gctttatcttactccatagctgatattattaatatttttatctctcatatttccattatttttg  
cgcat

>chr10\_100755010\_100755210

CCCAAAATTGTatttaccatctttaagccttggtttccttacctttaaatgtagataataataat  
tctaccttatgagtttgatgatgcctataaacaataagcaacgggtctgctacacatagtaagca  
cacaacaagtattaCCAATTACTATTTTATTATTGCTGTAATATTAGGCCCATTCCTGATGTAT  
CCCCC

>chr10\_109008610\_109008810

gagttttatttaaccgcatatatcatgacctactttccaatttgacttgactctagcataacatt  
acgtgacaagcaagaaagtcaaaatattttaccccaaacatgttcctttgcatattttgaaat  
ggccctgcaaagctgtcctttgtgggaggaaatttgatatttgtaagaatctctgttaacatagc  
tagat

>chr10\_110855210\_110855410  
catctgaagccttcttctcagctcgtcaaagtcattctctgtccagctttgttccggttgctgg  
tgaggacctgcattcctttggaggaggagaggtgctctgcttttttagagtttccagttttctgc  
tctgttttttccccatctttgtggtttcatctacttttgggtctttgatggttggtgatgtacagat  
gggtt

>chr10\_111289210\_111289410  
aaggaatgtcaaaatacaattgaaagctttatcaatggactggaccaagcagaagaaagaatttc  
agagcttgaagactgggtctttttaaccaatctaacaaaaataaagaaaaactgattataaaaat  
gagcaaagtctttgagaaatatggtattatgtaaagtgaccaaacctatgaattattgacattcc  
tgaga

>chr17\_15064875\_15065075  
cagctcagtacctaacaggtcacagaccagtaccagtcgagcccgggatcggggaccctgT  
TGTATACCTTGATTAGCAACAGTTTGTACTTATGTATACATGTTGTGTTTGAAACTTAAGACAGG  
GGTTACCCTTTACCAGATCATTCAAAGAACCAGTGGGTGAACTGGGCCTGGGCAGTCTGCCTC  
TGAAG

>chr17\_52105401\_52105601  
ttgcttaaataaagaccaaaaaatgcctatttcaaacaatattcttgggaataatttaacaagtc  
aatatagagaaaaaatatagtatcgggcacatcataaTAACTATTATAGAACATTTTAGTTGGCA  
CTTCTCAAATATAACTGACCATTTGTGTGTGTACACCTCTTAATAGCCCAAAGAACATGACTTTg  
tcaa

>chr17\_52746801\_52747001  
ttagacaatcatggcctctggggaagttttgataaggtctttcagggggttcttgggcaaaggt  
gtccatcagagaagtcccagtgctctcccaaggatgctgctaccataggatccctgccaaagtcagt  
tattggctggaagcaccatggaaagtatggcctcagtacaTATGTGGCCTCAGTACATATGTGG  
CAATA

>chr16\_13749099\_13749299  
AACTTAACTGTTTTCCAGTAGTCTTAGCATTAAATAACTATTGTCATTTTTTTATTTTGAATTAT  
GCATACACATGCATAAATATAAAATGTATGAAATATGTATGTGAATGTTATTTTGTGTCTAGATT  
AGCAGCATGAGAAAATAGATGCAAATGTAAAAATCACAAACAGGTAAGTTACaataataattttta  
tttaa

>chr16\_20660099\_20660299  
tccaccttcttgaccacaaccaatatacaccttacgtgtattaattgatgtcttatgtttcccta  
aaaatataaaaccaagctgtagaccaatcaccttgggacatgttctcaagatctgctgaggctg  
tgtcacaggcatgtctttaaccttggcaaaataacctctaaattgattgagacttatctcagtat  
tggtt

>chr16\_34459299\_34459499  
tctcagctactcaggaggctgaggcaggagaatcacttgaaccgggagtcagaggttgacagtga  
gccaagattgcaccactgcactccagcccaggcaacagagtgagactctgacttaaaaaaaaaaaa  
aaGTTCCAGGGATTTTCTGCTTCCAGGTGGTGCAGATCAGGCAGGACCATCAGCCATCCCCTT  
GCTTG

>chr16\_35139099\_35139299  
gatccagtgggggagtccttggactctcactgcattgggcatgcagagtatcaaagtgtaggggc  
ctgcccactttggtttagcttttcatgagggctggggttggcagataaacatgtctgtgctgca  
agacagttatgtatagaggacaaagagatgactatagggagaggcatggcctcatttgctgcttc

atgaa  
>chr16\_51240299\_51240499  
aagcggggcatggtggctcacgcctgtgatcccagctctcagggaggcagaggtgggaggatagc  
ttaggccaggagtttgagacctgcctgcgcaatatagcgagaccccactctccacaaaaaggta  
gaaaaAAagccaaaaacaaaatcagcataacaaaatagttagaaaagaatatttgaaatgttcc  
caaca  
>chr16\_53004699\_53004899  
aaacattgctgaagttgtttatcagctaggagattttgggcaaagactctggggtttctaggta  
taatcatattgcctacaaacagaaatagtttgacttccctctcaccctatttagatgcttttta  
tttctttctcttgctgattgttctggctaggacttccagagctatggtgaataggagtggtgaa  
agtag  
>chr16\_63520499\_63520699  
aaataaaGTTTTGTCTTTATTTCTCAAATAAGGAATGGGAATATAAGCAGTGAAGTATTTAGACA  
GGGTCACAGGCAGCAACTTTAAATGACAGCTCATCTCATTTCCACTGAGGTTACAAGGCCCTGCC  
CAGGAGGCCAGAGTTCAATCTGAATTCATCTTGCTTCTAGCATAGACAACAGTGCATTTCCCCCA  
CATAG  
>chr16\_80487299\_80487499  
CCATATACACGATGCTTTGCAGTTTGCATAGGAAGTTACTAGCCTGAGGGAGCAGGATTGAGGTG  
AGGAAACCAGATCATTACAATGGCAAATCACACTTATAGGAGGGTGAAGGAACAGGATGGGATG  
GAGTTGAGGGTTATGGTCAGAAAGGACCATTTCAACCCAATTTTAAAACATTAACAaggcagagct  
cagtg  
>chr15\_24378707\_24378907  
aacatgggaagagtgtgtacaagattttgagtagaactggggaatacatgactcttagtagctgc  
atgataagtttctgattacagtgaaaatttagacacacccaaaaacaacaacaaaaaaacc  
aagagtatagaatcaggttatcctggaggaaaacatttcttttatagacctctaaaataaaat  
ttcag  
>chr15\_37578308\_37578508  
GCCGAATATAGACTTCCTGGCCATACACTCCATTTGCTACTGCAGAATAAGATGATTCTAATTC  
AAAAAGGATAATGTTGGTTTTAAAAAAGTATAAAATAGAAATGACTGTTTTACAGTACCATAAA  
TGTAAGCATTGTTATACTAAAAATATTACTGTTATGAGACCAACTCACGCACTTCCAGCCTTAGA  
TAACA  
>chr15\_55204908\_55205108  
ttcctctaaaatctggaacacaacaaggatgccagctatcattactgttattcaacatgttacca  
gaagtcctagctggagcaatcagacaagacaaaattataaaggacatccaaattaggaaggtaga  
agtcaaattatccttgtttgccgatgatatcatcttatatttggaacacctaagactccacaa  
gaaaa  
>chr15\_82893145\_82893345  
gcctcccaaagtgccgagattacaggtatgagccaccgtgctcagccAGTTTCACCCCATTTTCA  
CCCCAAttctgttcttactctctgaggccacaagcccttttcgaggggctcttgtcacactttc  
agctcaccaggagcctgtggttatctgtaacctccagatcttaccttcacaaacactgcACACCT  
CTGGC  
>chr14\_30865049\_30865249  
tatggtcagctcttattaatttagccattttattgggtgcttattatagttttaatttgcatttc  
cctaaagactgtgatggtgagcatccttctgtgtgttaattaccattcatatctcttcttctgatg

aagcatctgtagaatcatatgccacttttaattggattgtttgtcttcctataattaagttgt  
gagat

>chr14\_46164450\_46164650

GAGAGAGGTAATGTATTAATATACCTGCAAATGTAGTCATCATATTCTTTAAATCCATAAGCAGA  
GTGGCTTCTACCTAGTAGAAAATAAGGCAGAAAAGCAAAGAATCCTTACAGTTTTCTCTACACCA  
AATAATGTATTTGGGTACAATCTTATTAGATATGAAGCTATTTTGAGCATGAAAAAGTTTCTAAT  
CTTTT

>chr14\_83689447\_83689647

atctacttgcgtagaacctcatggtcaacaggaggtgagacctgagggacttcaaagttctctac  
tgtgtatgtccacaacctgattataagtacaacttgacaattcaacatgactttctagattccc  
aggaacattttgtagattttcaaagtctcctatggacatttaattcccacatcttcatttttaga  
tttct

>chr19\_6291200\_6291400

ccaggcccccttctctcttagcagactgtaagcagcatctcaggtcttcttccccaccacgcc  
aggagtcaacatagctcttgtagactacagggagcttttctctgtggggttacttttgttccggtta  
gggagtgtattagttcgttttcatgttgctgataaagacatacccaagcctgggaaggaaaatag  
gttta

>chr19\_32574560\_32574760

ATCTCTTGCTAGAAAGTCATTATCTATAGCTTAAAAGAAACAATTTCTCTATGGGTTTGTACCAA  
AAAGGAAATATTCTATCTGCTTTCTTGGCTTCTCTGATGGGGCTTCACGAAACCAGTTTGGTCT  
GGGCTGTACGGTGAACACCTGTCAAAACGTATGGACCATGCCATTTATCAAATAATCTGCTCCAA  
GAACA

>chr18\_7218200\_7218400

tccataaacacagggtgtcattcaatttatttgtaccctcttcaatttctttcattaatgtttta  
tagttttcattacaaagctctttcacatctttgggtcaaatttattgctaggaattttatttatt  
ttttttgtagctattgtaaagggattgttttcttgatttcttttcagagagtttgctgttgat  
acata

>chr18\_14785400\_14785600

attccattgtatgacagtagcatagttaattGCACAGTTTTTATGCTGATAAGTAATAAATAAAA  
ATGAAAACATGCAGATTTCCAAGTCTTTAAAAAGTTAGTTTTTATGTGCTaatttttttagttatta  
gaaattaaaagtaaaatattttaaataatttCCTTGTGCAATCATAACATTCCACTAAGAATTTGAA  
CTGTG

>chr18\_26622802\_26623002

taagttttaaaatgtgattaaaactacatacctgcagaccccaaaatacagtaaacctatcgca  
ataaaacaagaataaaaaccacaccaaacttgatcatcatattagttaaaaccagtataagga  
ggaaaatcttaaagtagccagaggaaggatacattatggtcagaagaatacaaaagaggataaa  
aacag

>chr18\_35407802\_35408002

catttattaaatagggaaatcctttccccattgcttggttttctcaggtttgtcaaagatcagatg  
gttgacagatacgtggcattatctctgagggctctgttctattccattggctctgtatctctgtttt  
gggtaccagtaccatgctgttttgggtactgtagccttgtagtatagtttgaagtcaggtagcgtg  
atgcc

>chr18\_41815402\_41815602

gtagttttctaccactgatgtaaaaaattaccacaaacttggaacttagaatttctcttagag

ttttggggccagaagtacaaaatcagtttccactgggttgaaatcaatatattggcagggccaggc  
ttcctctagtagcttttaggagagaatatcattgtcttgccctttccagtttccagagctgctttc  
cttac

>chr18\_41918802\_41919002

aatgttctttacttttttgattgaagaactccttttagtgtttctcataggacaagtctgggtgtg  
ataaaaatacctcagattttggttgcaggaagtctttatctccttcatgattgaaggatattt  
ttgccagatacattctgtgttaagagatgtttccctcagcaagttaaatatgtcatgccactctt  
gcctg

>chr18\_47940602\_47940802

cccatgtaacaaacctgcacatgcacccccaaatctgaaataaaagggtggaaagagaaaaAAAG  
GATATTCGGTCTGGATGGGTCATAAAATATGTAAAAACATTCTGATAATTACACGCAAGTCTCA  
TCTTTTAAGAAAAGAGTCTCTAAATTAGGCTTCAAGAAATACTGAAATTCTGTACTAATTACGT  
AATAA

>chr18\_52323602\_52323802

atattttaatgtttaacttgtattaattacatttattttaaataatttaGTACCAGAACATTGCAG  
TTTGAAAATTCTGCAACACTACATTTAACATTCTTCTCACCATTActtcttattccacctggagaa  
ctatgcttatgtgccatagcctgactcaaattacaactcctctttgatgtcttctattttggta  
tgtgc

>chr18\_53382602\_53382802

TAAAAATAAATCTATATCATTTTTGTAAATTGGTACTTCAATTTTATTCATTAGTTTTTAAATAAA  
CGCATGAAGGtaatttttatttttattttttttctggttttttttttcttttttttttttaata  
actttaagttttagggtacatgtgcacattgtgcaggtagttacatatgtatacatgtgccatg  
ctggg

>chr18\_54704802\_54705002

CTGGTTTTTCATTGATTACGCAGTAGCATTTAGTGCTGCTGGCCAGTCCCTGGCACTGCCCGCTCT  
CCTTGCC TTCATGGGGCCACAAC TTTCTGACTTCTCCCGTTTGCTTTTGCAGACACCTCCTCTTC  
CTCTAGATATTCTTCTCCAGAGAGGCAATCTTTAATAACTTGAGAGTCACTGATACATATAAAAC  
AGACT

>chr18\_61904420\_61904620

ATAAGAGTATGTTTTatgtatgtatgtatctttcctatcagactaacctttttaagtgcagagat  
tatgtataattcaattatgaatcactccctggcagatagaaagcactaaataattgtaattgaa  
taatgaGATCAAAGAGGTCTATTTCACTTCTAAGTACTTTGGCAAATATCCACTGCTTATTATTC  
TGGAA

>chr18\_66198220\_66198420

TTTTGGAAATCATTCTACAAAAATTCTCTACACTGTGTACAGTATCAAAAATTTTTAAAGTCat  
gtctataattaggaaaatctttaaataatgtttgtaagccatactatgaaatatataaaggag  
aattaaattttattgtctgtaacaacagaggggaactggaagtcattatgtaagtgggataggtc  
agacg

>chr18\_73013612\_73013812

CTCTAGGAAAGGTTTTCTAAGGGAGATGATTGTCACATATTTTGGTTACAATTCTTTTCATTAAA  
ATGAGTCTAGATTGAATTCATTGCAAAATCAGCTTTAATATCAATATTTTCATGAAATGAGCTTCA  
TACCCCAAATGACACTCCTCTCACTTCCGGGGAGGGGTGCTGCGAGTTGCTGCAGGCTGGGTAGT  
GCCAC

>chr22\_48727536\_48727736

CATGGCCTGGTAGATGGAGAAGACACGCCCTCTGCTGCTGGTGCGTCTGAGGGATGGGAAGAGAG  
GAGGTGGCTGAGGGCAAGGGGGCACCTTCCTCACCTGGAGTCCGGATGGAGTGGACCAGCCTGGT  
CAGCGGCGGATGCTCTGCAGCAGGACACACGGGCAGGGACGTCCCAGGGGAGCAGTGCCAGGGC  
AGTCC

>chr20\_18901200\_18901400

gggggcagttttgtctcatggtttaacagcatcccccttggttgctcacgatagtgagttctcat  
gaaatctggtcgtttcaaagagtgtgacacctctccccacttctctctgctccagtcataatgatg  
tgccagcccccttcaccatctgccatgattgtaagtttcctgaggctaccccagaagctgagcag  
atgcc

>chr20\_22647400\_22647600

cacaaacacgtaagtaatctctaagaagttccagactccccctacagctatcctgttcttctga  
gccttcattagaattgccattaacatggccgggtacgggtggctcacgcctgtaatcccagcactt  
tgaggagctgaggtgggcagatcacgaggtcaggagatcaagaccatcctggataatatggtgaa  
acccc

>chr20\_31725139\_31725339

GCCTGACCCATGTTTTCTCTGAAAATTTCTTATCTGTAACCCAACTCCTGGTACCAGTTTCTGTC  
TTAGTTATTGGTTTTGGTTGCAAGGAGCAGAACTTTTCTGACAAAAAAGAAAACAGTAAAAAAA  
AATTGTGAAAAGGAAGTAGGGTTATCTCTCTGATATCAAAGTTTATACATCCCCTGGACCTCCC  
AGGGC

>chr20\_41154186\_41154386

ttcacttaaaaACACACACTCGTCCTCTCCCAACATATACGTAATTGTTACAGAAGGATTTTTTT  
AGGATACACGGTTTTCAATATTGCCATAGTGAAAGTAAGTTGGGTAATTTCCACATTTCCATTT  
CCCTAATTATCTCTTCAAATTTCTCTGATTACCTCTTCGAGTCTCTATAATATGAAGAGTTGTGA  
TTTTT

>chr20\_51449393\_51449593

TCTTTGCCTCTAATGCTTGCTcatggctgtgttttctgcttgctagccacataacctggctaa  
gtcacttagcctcacgggggcttcagctgacttatttgtaaagtacaggggtgtaacaaatgaatg  
atTTTTTggtgTTTgTTTTgTTTTgagacagggcttggttctgtcaccgaggctggagtgcag  
tgctg

>chr21\_15593129\_15593329

TGTCTGGAACAAACCATCATGTATCTTACAAAGTCCAACGTCAATGTCATTCTTATTTACAGTCA  
TTGATTTAGACAAAGGTTGATTTTAATTCATTGATATATATATAGTACTGTAAACAATCTATAAA  
TATGATTTGAGAGGTCAGATATGCATATATCTTCTCTGAGTACAGAATTTTAAAATCACTACTAC  
GTCCT

>chr21\_25239729\_25239929

aggcaggagccagaggtgctgatTTTTcattcagtgtgtggggtcagaaccaaccaatgaagattt  
attccATTGAACGTGCTAATAGTACACATGTTGAAACATGCCTATAGACAGACCATTTCAACTGA  
AAAATGTAAAAGATATATATTATCagagatgTTaaggaatttgtccagggtcacctactgagtca  
attgc

>chr21\_41258130\_41258330

agcccaCCATACTGCAAAAGTGGTAGTAGCTCTGCCCAATGTCAAGGACCATTTCAGAACCTTCTA  
TGATATTAATTTTTCAGGAACTGACAGCAACACAAAAGTCGTCACCATGAGTCTTTGTTGAGCCA  
AGTTGAATAACAAGTGGCTTATTTTACTAAAATACAAAATCTACTAAATACACTaatactagtaa  
aatac

>chr7\_8715875\_8716075

TGCAATAATGTAAGTAGTTTAAAAACAGTGTTCAAATTTGTCCAAATAGTCTATCAAAGCAAAG  
GATGGAAATCTGGTGTCTGTACTTTAGTTGGCTTGTGTGTATTAAGATGAGTAGCTGTAAACTG  
AAGTCATTTGCATAAACTCCACCTGAGGGCCCCAAATCAGGCCTCATCTATGCAATCGTGATTT  
TTATT

>chr7\_11293675\_11293875

aacctcgtctctactacaaaaaaaaaaaaaaaaacgaaaattagctgggcatggggcgg  
gcacctgtagtcccagctactcaggaagctgaggcaggagaattgcttgaatctgggaggcagag  
gttgcagtgagccaagatcatgccactgcactccagcctgggacacttagactagtgactcggg  
ctcaa

>chr7\_13413475\_13413675

cgtattggtagtgtgtgtttttgtttttatcttggtatttttaaaattcttttttgatttactat  
ttgacctaatgattggtaagagtatattgtttagttccataacagtttgaattttctcgtttt  
cttgctgttaatgattttctagttttcattccattgtagttagaacaggtacttggtatgattttga  
tttta

>chr7\_13508275\_13508475

TATTCTAGTAGTAAATATGTTTAGAAAAGCATAATCAATATTCCTTTGAGAAGACACAACAT  
TATCACAAATATCAGTTTATCTCAAGTAAATGTATAAATATAATACTGGTTAAGATCATCAAAAA  
TACATTCATGAAATGTATTAGAATAACTTTCAAATGTACCTAGAAGGGGAAAAAGCTGCAAAAAG  
CATCA

>chr7\_21772075\_21772275

tggggggacacaatattatcagcctgtaataTtactccggtatgacttcatcctatctcattaca  
tctgcagcaccctattcccaaataacatcacattctgaggtactgcagatgaggacttcaacat  
agaaatttgaggaggagacaattcaacccttaacaatgaggaaatttattatttcacaacaag  
aatc

>chr7\_24586875\_24587075

AGATTTGTTTGTATCAGTCAAATGAAGAAGCTGGAGATGTTGTGTGGCAAATGGAAAGACTGAT  
AGAAACCTGATTCAGgtaagactgaagaagagaccaggtgtatccaagtgggaaggaaatgaggct  
gggtgggcaggaggggccaagagataatgatgatgccttttatgacattctcaaaatgtttaagt  
gcatc

>chr7\_49083254\_49083454

agtactggaagtcctaactagagcaatcacaagagaaagatataaagggcatccaaattggaatg  
gaagaagtaaaattattcctgtttgctgatgatgtaattttacatttgggaaaacctaaagactc  
cacaagacaactattagaatttataaacaatacagtaaagttgcagaatacaaaatcaacatac  
aaaaa

>chr7\_49126054\_49126254

cttccgtctatcttattttattctctccctctggatcaaatactggatttcctcaagcttctcttt  
cgaccttgaattttccagttttcttttttaagatgtttctcaatttacttgactatttagat  
ttttaaaaacttttttgaatgcatttgtttcatatatactatgttttctggttggtcatttattt  
tactg

>chr7\_53039506\_53039706

GATTATTTCAATTTGCAGTGATTAATGATGTTGGCATTGTTTCATAATATAATTGTATTACTTTG  
TATTTCTACAGCATTCTTTTTCTAAGAACTTAAAAGTACTTCTCTTTTCTTATACCATCGAGAAG  
TAGTGTAGTGTACAAGTACTGTATAATAATTTTAGTTTTATAATGGTAAAGTCACTAGCtatttt



tataa  
>chr7\_79527864\_79528064  
tatggagaaaacaaaaagatttgctttagtggagggtgtttctctagaatttgatgatgga  
tttgatgtgaggaataaagaaaaactcccaagcggttcagcctacgtttttcattgaattgtgata  
ctgtttacacaagtgcaacagtagtgtttttataatggcaaacactaagagaaaaaatataaa  
gatgt  
>chr7\_103860764\_103860964  
ctgcacagatagagccaatttactgagagctgagacagtggatttgcaatagagaaagaagtcaa  
taattgcagggccagccaagcagaaagaagggagtttttactcaatcagcctgcctgaaaattt  
agaggctaggatttttcaaggatagtttgggtgggcaggggctagaaaatgggaaatgctgcttt  
attgg  
>chr7\_108897564\_108897764  
GTGATATTTTCATTCATCTGTTGGATTAATGCAAAAAATGCAATAAACTCTCATACATATGAGTC  
ATCCACTAAGTAATTCCTTACCATGTGATGGTTTATCATAGAAGCCTGATACATTGTAATTTTTA  
AAATTTAACCTGGGTACCAACCTGAGTCCATGTACCTTCCACAGGGGAGACTGAAGCTAAAAGTC  
TTTGA  
>chr7\_109685164\_109685364  
ATTCCCTAATCCAACCTAAATTTGTAAATTTGGTGAATTATGTATCTGTTTACTTAcatttcttc  
tcaggtaagtaacaaattgcctcagaactatztatgtaaaattacccttttcccctataaatat  
aaaatgctatctatcataaataatattttcatgtgtttgtagattaatgtttaggttttaaat  
tctca  
>chr7\_110796964\_110797164  
ctactccatgtgtcagtgatgagaagacgtgattttcaagaagtctgtcaagttcacttaaagg  
tgttcaatatcactgatcaacagagaaatgcaaatcaaaaccacaatgagataacatcacactct  
agttcaaatggctttcatataaacataaggcattaacaaatgctagtaaggatgtggagaaaac  
agaat  
>chr7\_112801764\_112801964  
ccttacactgtgtttgttttcatcaaacctttattaccatccgatgcattgtGAgcacatagca  
ggtgctcgataaatatattttggattaaAAAGTTTATTAATTAAGAACTCACAAATATCTATTTA  
CAACTGAGGCTGCTCTCCTGGGCCACAAGTCTTAGAAGCCATGGGgtgtagaagttaagatgatg  
ggctc  
>chr7\_114310964\_114311164  
TACTATTTTTGCTGATGTTTTGGATCATTATGTTGCATTGCAAACTCTAAACATGAAAGCTTTT  
TTTTTGCTCACATATGTTTTCATAGATTTTTTAATTAACAATTTTTTCAGTCAACTTATTTTTT  
TCTAACATTTCTGGTCCTCTTACAATTTTTCTTCTGATTTAATTCATTTTTTATTTAATCTCTAA  
ACTTT  
>chr7\_115090164\_115090364  
AGATGCTTTTCTAGATTCTGTCTGCACTGCCTGCTTAGTGGAGGGGCAGAGGACATATGGCTTTT  
AATTTGATATGTTTTTAGCGGGAGTAGCCATGGGGCATGTCCACAGCTGAGGCTAGTTTTGTGGC  
TTGAGATTCTCCCCACTTCTCCCAAGTGTGGCCATCTATCTGGGTCCTTGTTCAGAGCAAAG  
TCCCC  
>chr7\_118397964\_118398164  
gcaggctggataggagaactgcaaccacttatagaaatacagtttatataaccattttcacttagc  
cctctccccctagcaacctctatttaaccagaaagagggccgtcatccattctacagcctgca

ttccatgggatgggctgagaatttaagtgttcctcaaagataaagaatgaaaccttgtggtggg  
atttc

>chr7\_153316867\_153317067

GCTTGGCCCTGCAGTTAGTGTTAGACCCCTTAACAGGGTGATTTGGTAAAAGTTAGTAAGCAGT  
TAAGCTGCATAGCTGAATGTGATTTTAACTGTACTCTTAATCGTGGTGGCATTACAAGAAGGAT  
GTATGGTAGCACAGGGCTGGAGGGAGAACACCAATGGACTTCCTCTTAGCCCTGCACATTCGCTC  
TGCTC

>chr7\_159065439\_159065639

caagagctcgagatacagaagactgtcacactggccctctgcccttgcaataaggcagagtccat  
tgagctgattaacacacaagccatctacagatggcaaagctgaaagggcttgtaacactggggt  
tgcaggcaaccaaccagcccctagacactaccgogggctgagagcctgaagcactcacctggc  
ctgtg

>chr6\_22938021\_22938221

agggattcaacctgggtatttacagtgtacttttcattggatacttctttatcatggcagatggc  
ctaagtcttaagtgtacagatccgtgaccaggtgtccctctcataggatcttatttatactggct  
gataccctagtggctcttgtgtgacttgtgtccagtttattcctaccaagacaactactttctaa  
gagaa

>chr6\_39708622\_39708822

ccaacttacaagggatgtgaaggacctcttcaaggagaactacaaaccactgctcaatgaaataa  
aagaggatacaaaacaatggaagaacattccatgctcatgggtaggaagaatcaatattgtgaaa  
atggccatagagccaaggtaatattatagattcaatgccatccccatcaagcaaccaatgacttt  
cttca

>chr6\_56031041\_56031241

aagtataataatgtatTTACACACTGACATTCAAAGCATCCTACATTTTTCTGGAGCAGGTCTC  
ATCTTGCTTTACCTGAGCACTGGAATAGTCATAGTCATAGACGACGGGAAAAACATTACTGACA  
gggcgtgggtggctcacgcttgaatcccagcacttttagagggcttaggccggcgaatcacctgcg  
gtcag

>chr6\_70045879\_70046079

AGTTTACAAGTTTTATAATACACAACTATATTAATATTTTTCTACTGAAATCTTTTTTCTt  
ttttctttttaacttttaagttcaggagtagaagtacaggctttttacacagataaacttgtgtc  
tcagggatttgtgtacagattatttatactcaggatattaagcctagtaccattagttTACCA  
AGAAG

>chr6\_92626079\_92626279

aatagcaaagacatagaatcagcctagatgtccatcatagtagattggagaaagaaaatgtggta  
catatataccatggaataactaggtaccataaaaaaatgcaattatgtcctttgcagcaagaagg  
tggaaactcagggtcattattctaagtgaattaacacaagaacggaaaaccaataactgcacgttt  
ttgct

>chr6\_103419707\_103419907

CCTATAAAATTTACTCACCTCAAATCTTCACTATAAAAAAATCATGggccggacgtgggtggctc  
acgcctgtaatcccagcactttgggaggccaaggcaggcggatcacgaggtcaggagatcgagcc  
catcctggctaacacgggtgaaaccccatctctactaaaaaatacaaaaaattagccagatctgg  
ggtga

>chr6\_104564707\_104564907

CAAAAGGAAGAGGAAAAATAGAAATGAAAAAAGGCCCTGACTTTCATAAGGAGAAAGTAATCTT

TTGGCTCATTAGTGTCCTTTGATTCAAATTACTTGAATAATACATTTTTTTGAAGAAAAGAGATAC  
CTACATTTTAAGTAAAATTGATGTTGCTGTCCTATGAATCTTTTATCATTGAGTTATTGAATATT  
TTGTC

>chr6\_107487907\_107488107

caaaggccttttctgcatctattgagataatcatgtgggtttttgtctttggttctgtttatatgc  
tggattatgtttattgatttgcataatggtgaaccagccttgcacccagggagaagcccacttg  
atcatggtggataagctttttgatgtgctgctggatttgggttggccagtattttattgaggattt  
ttgca

>chr6\_113085307\_113085507

aaattcaattgggcatcctgttttattttgttttaatttgtaaaccctgacacctctaCAAAG  
CCAATCTCTAACATCACTAAAAGAAGATTATGAGTCTTCACTGTAGATTTCAACCTGCAGAAAAT  
AACTGAGAAAATCCTGTTGTCCCTTAAATACTAAGACACATTTCTCATTTTATTATCTCTGAGGCT  
GATTG

>chr6\_161095210\_161095410

atgtaaatcaataaaatgtgactcatcacataaatgtgactaaagacaaaaccacatgattatc  
ttgatagatgcagaaaaggcttttgaaaaatgtaccaccgttcatggtgaaaactctcaataaa  
ctaggattgaaggaatataatctcaaaataataagagacatctatgacaaaaccacagccagcat  
catac

>chr6\_164607610\_164607810

TCAAAACAGAGCTTCAGAGTTTGGTGGGGTAATTTTTTTTCTCCTGTAATTTTTTGATAATACCA  
CTGTATTACATTCTTGATGTAGTGTAGCTGCTGGCAGACTCATATCAAGCAGTTTTCTGTTGTT  
TCCTAAGTAGagatgcttgtcaacttaaggtggacttatctccctataagctcatattgagttga  
aata

>chr5\_2122600\_2122800

ataattcatagctcacaattcttctttaagtacttacaaaaatgctggggcactttctttttgct  
ctaagttttggggtaaaaaagctgctgttattcaacttggggttcccttgtaggtcagggtgctgc  
ttctttttggctgctttcaagattttttctttgtttttcattttcagaagttaattggggcgag  
tttgt

>chr5\_2940800\_2941000

TGcttttattttggattgcagggtatgtttgcagggtttgttacatgggtatattgcaagatgccg  
aggttcgaggtaggaaagatccaacaaccaggtaaggattatgggtactcaggagttcttcaacc  
ctagcccagctccctccctcccccataatagtccttagtgccactggtgtcatctttacttc  
catga

>chr5\_6975400\_6975600

tggtgactataattcaacataagatttgggtggggagacagatccaacacatattcattcaacc  
tgtcccctcccaaatctaatgtccttctcacattgaaaaatacaagatcccctctcaacagttg  
cccaaagtcttaaatcattccagcattaactcaaaaacccaagtccaagtcttatctgagata  
aggca

>chr5\_11839200\_11839400

GAGGCGTCTAGCTCTCTCCTTAAATGAATCTCAGCCTTTTTTATGATTTATTAGCTGTCCAAGTAA  
GGACAGTGGTACAGATGGACATTTGAAAAGTATTGCTGGGATCTGGGGTCATACAATTGGTGATC  
TAGTATCTAATTACCCAGAGAACTGAAGCATATTCCATCGAATAGCCAATTTGGTCTGCTAGGGA  
CCAAT

>chr5\_11840600\_11840800

TTCTATGGTTTTATATTTTTCAAAGAAATAAATATTTAAATGGGAAGATGCCCATTTGTTTGTGATT  
TTGACTCAACTTTTAAACTTGCACATTTTGATCTGAATGCTACAACTGGACCCACCAAATAA  
CTCGTATCACTTCATGCTATTTAAGAATCATGAGTGTTTACGTGTAGGAATTCATGCTGTTTAGA  
GTAAA

>chr5\_13497800\_13498000

ttacttgtggtgatcttttctattgattttctagtctctattacatttatttctgctccaatctt  
tattatttcttctattaattttggacttagtttgttattcctcttctagttcattgagatag  
tactagattgtttatttggatatttttcttctgttttgatgtaggggttcattgctataagcttcc  
ctctt

>chr5\_35554843\_35555043

TTCTTTATTAACATTAATTTCCAGAAGAAAATTTTCCATCTGCTTTTTTAACTAGGGTTATTTT  
CCACCGGATGTGTTTAGTATAAGTAGTCAGGAGGTATCATGTTATTTTTCTGAATTGTTCTAGTT  
CATATATTCATATTTTTTAAAGTATGGTTTTGAAAGAACCATTTTTTATCCAAAAGAAGTTCGG  
TAGTA

>chr5\_43735443\_43735643

aaaaaagcgaatttaaatgatgagtcttgaattgaagttgggtaatgaaggaaaagaagacagga  
gtagggtgagagacagtgtaaaagtgatagagtctgtagactggaggtcctgtattggtcaaaaa  
attggtgatagggtattggatggggtgcataagaatcacttgagatggtgattggagaagggaaat  
ggtgg

>chr5\_50712443\_50712643

tttaaacattaatttaaaaatttataCAATACTTTTGATTCATATTTATCACTATGGGGTTTTAT  
TTTGGTATCTCCTTTTTTCCAGGTTTCCCCAGAATCCCAGCTCTCAGTGACTCTAGGAATATTAG  
AATGAGATTATATAATGAACCATTGCTTTGTCCTACAATGCACAAATGGAAGTTTTAGATTAAC  
AATAT

>chr5\_51269843\_51270043

gcttaacatctaataagtgggttgaatgaaAAATTGAATGATTTCTTAGAGGAAAACTCTCTGA  
ATAGCCCATGTATGTATTTAAGGAGAGGttttattcctttgcttttcttctttttttttttttt  
tAAAAAAAAAGAACAATTCTTACCTTTACACCAAGTTAGTTAATCTCCATTGTCAAACAATGG  
GTCTT

>chr5\_62959844\_62960044

cATAACAATTAAGTTATATAACTAAGGTTAAATAAAAACTCTAGTACTGATGTTTCCATTAATAG  
AGTCATTCTAGTTTTGGCATTCTTGTGCATACATAATGCTGTCATGAAACCATATTGCCTTGGAG  
CTAAAGTGCCATTTTATGCCAAATATTTATTTGATAGGGAAAATGAGAACCACAAAGgataaatg  
atatt

>chr5\_75309844\_75310044

GTCAAAAAATGCAGCACTTCTACCAGCTAAATGCCACTGGGGCCTGCAAATTATTTAACAGCC  
AAGaagaaggaagaaagagagagatgaaagagaaagagagagagaaaggaatgaggaaaggaagg  
aaggaaagaaggaaggaaggaagaaagaaagaaagaaagaaaggaagagaaagaaaggaagaa  
agaaa

>chr5\_83281044\_83281244

TTAAACTGCTCATGATCAATATGAGGCATTGCTACTAGATTTCTGTTCTAGCATAATGATTTCTC  
TAGTTTAGCAAGTCTTGGTGAGGCATAACTGCTGGAAAAAAATGTATATTTTTGTATCAAATTT  
TGTTTGGACAAATTTTTTTAAAGACTCTAATTCTTTTCTTTGCTCTTGCTTATAAATATGAAGTG  
TTTAC

>chr5\_84558044\_84558244  
AGAAAACGTGGGTCCCTTGCATTTTCACGTACCTGTGCAAAATTACTGCGAGTTCCCAAGTCAC  
TTTATAGATACTAAGAGGAGTAAAAGGCTATAGTTTTTATAATTTGTCAAATATGTACAACTGAT  
AAATGTTGTTTCAGTTAGTGGTCTTGTGATATTATTATTTCCCTAGACTGCTATAATATGAAGATA  
ATAAT

>chr5\_101355901\_101356101  
aaattcaggaaatacagagaaacacgacaaagatactcctcgagaagagcaacccaagacacata  
atcgtcagattcaccaaggttgaaatgaaagaaaaatattaagggctaccagagagaaaggtcg  
ggttaccaacaaaggaagcccatcagactaacagtgatctgtctgcagaaactctaccagcca  
gaaga

>chr5\_104438701\_104438901  
aacttttgtcaaattgcttaaatgcctcaagcctaaatttatttgaattatagagatgtactacc  
taagaatatttgtgtaatggttcaagtaagagcatgtgtgtgagcttagaacagtaattaatattt  
gataagcctcaataaattgtaatcactattatAGAAAATCACAAATTTCTTCCCTGTATCTAATG  
AAAGT

>chr5\_117539501\_117539701  
aataaataagtgtccagcatataatcaaaaatcacctgtcatatgaagaaccaagaaaaatcaca  
acttgaatgaaaaatgaccatcaatggatattaacttcatagtaaatcagatggtgaaattatct  
aacaagaatcttaaaacaactgtcataaaaatagttcagtaatctggtataaatctctaggaact  
aatga

>chr5\_118165701\_118165901  
agtcttacatttacatctaggatccatttacagttaacttctgtataaaaatagaggtttacgta  
gaagttacatgtgtgtattaaattggtctggcattatttgttgaaaagactatcctctcttactg  
aattgcatttgtacctttttagaatcaTCTTTTATTTTAAAACACTtttttttttttttttgagat  
ggagt

>chr5\_120953301\_120953501  
acgcgccacctttaagagctgtaacacgcactgtgaaggtctgggcttcactcctgaagtcaagc  
gagaccacgaaccaccagaaacgaagaaactctggacatatctgaatatcggaaggaacaaacta  
tagacacaccatctttaagaactgtaacactcaccacgaggggtgcgcggttcattcttgaagtc  
agcga

>chr5\_125521901\_125522101  
aagagcccaatttaaaaacgggcaaataatttgaatagccatttcttcaaagagatatacaaag  
gccaataagcccatgaaaagatattcaacatcattagtcattagggaaatgcaaaccaaaactgc  
agtgttgctatttccattgacaaggtggctgtaataaagagaaacagatagtaacaagttctg  
gtgag

>chr5\_130115501\_130115701  
tcaacacaaaacaatcaatgtatatgagtaaaattattggacttcaaaaatgaagaaagcacttt  
ttggatgttcaggaaacaaaatcaciaaaccaattattgagaacaaaaaaaaaatcaagcagaa  
gttttagactgatccacagtaacattcaaaactagatgacatgggatctatccagaggaaaagaa  
gttat

>chr5\_137111701\_137111901  
gcgtagtatttcatggtgtatatacaccacattttctttatccagtcaccactgatgggcatct  
aggtcgattccatgtcttttgctattgtgaatagttgtgcccactgtggaaaagtttggtagtt  
cctcaaacattcagttaccatatgagctagcaacctcactcctagatatatagccaagaaaaatg

aaaac  
>chr5\_160446822\_160447022  
tatatcctattagttctgtgccctctaagagaaccctgcctaacacaCAGCATATCCCTCATGAAT  
AAAGGGGGAATACTGTAAATAAAAAACAGCTAAAAGGCAATTATAATAAATGTATTTCTAGCAAT  
GTTAAGACAATTGTTTTAAGATAAAAACTCAATTCTGAGATAGAGCATGAAAAGAGTTGAGTAAA  
TAGTC  
>chr4\_6520099\_6520299  
gaaaagatcgataaaattaataagcctccagccaggctaacaaggaaaaaggagaaggacacaac  
tgtaataactagaaatgcaagaggatacatcactacagatgccatggacattcaaaggataatca  
agtaacactgtgaacaactctatgccacaaatttaataacctagatgaaatgccaatccttaa  
atgat  
>chr4\_25616102\_25616302  
tttctTGGGTAGAAAATATACTCAGCAATAAAATGTCACATAAAATTAAGAACTCTTTCAAATA  
AATGTGTTAGTGATAACATAGggctgggcccattggctcacgcctgtaatcctagcactttggga  
ggctgaagtgggcagattacaaggtcaagagatcgagaccattctggccaacttggtgaaacccc  
gtttc  
>chr4\_29197302\_29197502  
gtgcagatatctctttgagatgctgaattcaattcttttgatatataccaaaaagtaggattgc  
tggattatatggtagttctatatttagtttttgaggaactcccatattgttttctgtagttgct  
gcaactggttacattgctaccaatagtggtgcaaggatacactttccttcatgtgtttgtcaaaat  
ttggt  
>chr4\_34453405\_34453605  
cttataatggaatattaagtacattcttctaacttggaaaggaaataaaaaactagatataaagaa  
aagaaaacaagccaaactcattatatttttgtaactcataaaccagccatgtacacacaatggtg  
taagcctattaaatttcattgttttctgcctatataagcaagaacttaggagcactggctccatt  
tctct  
>chr4\_54084843\_54085043  
gctggcgacgagctgcattcctttggagggggagagggcgctctgatttttagatttttcagcttt  
tctgctctgctttttcccatctttgtggttttatctacctttgctctttgatgatggtgacata  
cagatggggttttggtgtggatgtcctttctggttgtagttttgcttctaacagtcaagaacca  
cagct  
>chr4\_64994805\_64995005  
TTTAGTTCTTCAGCTGAACTTATCATATCCTTGTTATTCCCTTGATCTGACTGGATTCAGATTA  
ATAGTATCTCTTTAGCCCAATCTCCATTTCTTAGTCTTTCATCTACTTCACTCTTCATGTAATT  
AGTTGCCATATCCACTGATCATATCACTGTAATACTTGCACCCTACTTGCATTTTTAGTGTCTATA  
CCTTA  
>chr4\_87321976\_87322176  
CTACTGATAAAATATAATTATTCAGTCAAATACAAGTATGCCATTATTCTttttatttttaaaga  
attttattaaatCCAAAAATACAAGAAGATTTTTATTGTGTGCTTACATAAACATGGAAAGTAAA  
AATAAATGACAAAATCAAATGTGGGTCACGAGGTCAATTTTCTCAGTTAATAAATTTGTAACCTAA  
AAAAT  
>chr4\_91951977\_91952177  
taaatttaaattaatattCCATTCTGAAAGTCTACTTTAGGGTTTATGATCACACATTACTCTGT  
TAGACCTCTTTTGGTATCTGGTTAGTCACAGTTTTTLAGAGCAGTGGTCTAATACCTTCATGGTCA

CACCTTCTGTCTTCAGAAAGTTCATTTAGTTTCAGACTGTTAGCCAGACATCTTACAAATATTTCCATT

>chr4\_96062777\_96062977

TTCAATCTCTATTGGGAGGAGAAAACAATGACACATGAAATGCCTTGAAGAACTTACAAAGCTTTCACTCTTCACTCTGAAGAATTCAGCAACCACTCTGAGACTTCAGAGTCAGAACAAAATATTTTCATATGGGAAAATAAATCCTGGCTTAGGGCTCTCTGGTATTAAATTAATAAAAAACCTGCAATAAAG

>chr4\_104197551\_104197751

gtgactagtagggccacagtgatggtttgggtctccaggaattaatgtcagtttagagccagtgccaggagcccctaaaagttctgattattcccctttcctcaatgaacagttaccctgataactgtatgtccctttggggaaggggtgggagaaagattagctgtacaaatttttggcaatgtaccagggctcttctc

>chr4\_104919951\_104920151

AAAAAATAAAAAGACAAAATGTTTACCTGGTTCTAGGTACGAATCCTGGAAGTGGAAGGAAGGGGCATGAATTTTCGAAATGGGGAAGAAGAAGAAACGACAGCAACTAGATGTCATAATTTACAGCAGCAGATGTGAAGCAAGTTTTTGGATTATGGCCAGTGGAAGAAAGCATGCCAGACAGCTAATGggaggcaa

>chr4\_117691752\_117691952

ccaccctctcggcctcccaaagtaccgggattacaggcgtgggccaccgcgcccggccCTATTTATAATCTTTAAAGAAtttcaacttttatttttagattcagagggtagatgvcgagatttgttacctgggtatattgtgtgattctgaggtttggagtgtgattgatcccattaccaaggtactgaacataatacc

>chr4\_120854752\_120854952

CGTGGCTTTGAGGCATTTACCTATTTGTGCAGCCACCTCCTCCTCTGTGAAAAGGTCACTCTTCTACTGGAAAGAGAACCCTGTTTTTATATAAAATGTTTTTTAGCAGAATACTGTAAGTTCTATAATactgaagaagacaaacagatgggtgagtccacatatgaaaagaagttcagcatcattaacctcagggaaat

>chr4\_130792350\_130792550

acatacgtctgcatgtgtctttatagcagcatgatttataatcctttgggtatataccagtaatgggatggctgggtcaaaggtatttctagttctagatccctgaggaatcgccacactgacttccaatgtttgaactagttttacagttccaccaacagtggtccaagtgttctctattttctccacatctctccag

>chr4\_131235950\_131236150

gatctgctttccctcagagtacagatcactacttgacattatattatattatgcatttatttcttcttactttctgtaatgtaggcttaciaaagtagaaaatttcctgctgtgtttactttgtatcacactgactggtctcactctgccaccagggtgaagtgagtgccacaatcatggttcactacagctcca

>chr4\_131537950\_131538150

ttgacagcagtcacaaggctgattatgtactatgggaggggatataattctcacttgatcaatgggaagagtaccaacatatctggggccatgttttaaaaccaccacaGTCTTGAAAGACATTGGGAACATCACTCACAGGGAGCATGTGAACAAGGTTCCAAAGGTACATAGGCAAACAGGCCAAAGCCACAGAAATG

>chr4\_135490950\_135491150

TGAAAATATTTACAGAAATAAAAAATCTTTGCATTAATTAGAAGATAAAGCAACATTTTCTTAAG

CCACTGATATTTTTACACATATTTATTATTTAATATTGATTTATGATTTTTGTCTCTTTATCAT  
TATAGAGTTTTAAGTTAATGTACTGCTTTTTTTTCAGAATATGTTTAATGCTCCTTAACCACTCTA  
AAGAA

>chr4\_135671950\_135672150

aacaaaataaaaCTCAACAATTGTAGTTTGAGCTATTCCCTACCAAGCAATCCATGACAAATCCTA  
AAACAATAAATGACTatttgatactattatagtcctttcaaatcctttgcaaaaatacttattcaa  
tcttggaacaatcacatgatgtaagccgtgttttccatcttatttaattgaagaaaaagctaag  
aaact

>chr4\_136887350\_136887550

tgagggactcacttaatcttattggcttcacatctacacaaatgagacacttagaaagaataatt  
ctaaaatccatacagctttaatattctatgatGGTCAGACATAGAATATTAAGGTTGGATGAAGT  
ATCTTTTATGCATAAATATATAATTCTATACATTTTAATAAAAAGTTGAAGTTTTAAAGCTATGTG  
TTTGT

>chr4\_153162550\_153162750

atatataagagctcttatgaatcgataagaaaaaaagccaacaattcatagaaaaatgggcaa  
gatcatgaaaaggtaactgacaaagaaagaaatgcaaatgactttccaacacagataagatactc  
aatctcatttaaaattaataaccaagttaaaacaataatgagctacaacttttaacctatcaag  
ttgat

>chr4\_156339550\_156339750

gtctgtgcttttgaggcttagccataaaatctttgctagactgatgtcttgaattatctcctc  
acgtttttccacagtggttttatagtttgggatcttaATGTTTTACACACTTTCTAGTTGTTTAC  
ATGCAGCATGCCGAGATCTAACTCTAGTTATGGGTCTAGAGACAACAAGAAGTAGGGAAATCACA  
TTTCA

>chr4\_160905550\_160905750

gatacttaaacttttattactctgttatctagcacattaataaccaagttatattctatctagtt  
taataggtgaaagagtgccatagattcaaccaataggctgtggggaaggttttagagtgaggaaag  
aagctagtgccaccctatgggtgcagctctttgggctaaatcagtgtactgttggtttacacc  
tcaga

>chr4\_171853425\_171853625

tCAGGCTTCCAagtcagttaacttgattataaatcagtaaaaattattcagctctgaacccaaaag  
aaaaaaagtaataaattcaaaaaggatcagaaattcaggggtgtgcgggacaatagccaaaggt  
ataacaattgtataattaactgcaggacaaaaaaaataaggtgtgaaaaatatttgaaaaacta  
acagc

>chr4\_172133825\_172134025

ACTCTGCAGAGGCCACATCTGCCTGATGGCATCCACCCGCAAGGGTGGCCAAATACTAAAAGGG  
TAATTGCTGCCTCATAGACTCTCCTTACTACCTATGTAACATTGCTAAAAGTCCCTATGCAGTACA  
TAGTGCTACCTTTTTCTGTTACAGGATGAGGAGAATATGAGGCAGGGAAGTTTACGACTAACCT  
GGTGT

>chr4\_172695825\_172696025

TTTATTTTTTTCTTCAGAACTAATTGAATGAATTCTGAAGACTTGCTGTTTAAATTATGCAAACA  
TAATATTTTCTCACATTTATGGCTGTCGTAATGTTTCTGTTGCTGCCTCAGGAACTGCATTGTAC  
TTAATGTAGTTACAGATAATACTGTCATAACTGTCATAAAGACCACGTGACAAGCCAGGCAT  
TCCCA

>chr3\_2444000\_2444200



TGAAATTTTTGGAAAGGAGATGTAGATTTAACTTAGAATTGTCAGGTTCAAGTCTTTTCCTCCT  
CCATCTCTGATTTTTTATTTTAGATTTTAAAGTAttatgaattcatagtagtcgtacatattaa  
ggggtacatgggatatTTTTgaaacaaacatacaaatgtgtaattattaaatcagggtaattgggat  
attca

>chr3\_7796800\_7797000

TAAACAGAGGGCAAAGAAAGGAAGGCTCATGTGTGGACTCTGAAGGAAATCTCAATGAGAATTCC  
ACAGAGCGGATGGTCTGGGCAGGGTATTTTCCACAGAGCTGTCTTTGGAAGGCTGCTTAAATGTA  
TACTATCCCCAGAGTTGTTTAACTAAAACCTCAGCACAGGAAAACATCAGGGTTGGCAAGGACCAC  
TCCAA

>chr3\_22790196\_22790396

aagatcccctaggaggataatgcCTGTTGCCGAGGAAACACAGCCTCATTGGGTTTCAGATAAT  
GCCAAAAATGAAACAAAAAAATTCACAGAAAATACAGAATGAGTTCAGCATGTGGACTACATTG  
ATGTTGCCTTATACTCTGTGTCTTCATCTTCCTTCTCCTTTTCTGTTTCTTCACTTTTGATACTA  
ATAGC

>chr3\_35232196\_35232396

GCCTTTGTTTATGGGATATGTGAAATCTTCCTAAACAAAGACCAGAAATCTTGAGGAATCCCAA  
TCTTGCTGTTTCAGATTGTTTCAGTGTGATACTGGCTTCTTGCATTGTGAACTGTGTAGTTTGAA  
AGTTGCAATAAAAAGTCAAGGCAATTGGGGTTGCAAAAAGAGGGTTTTTCAGAAAAAGGTCTATTTG  
TTTAA

>chr3\_39787596\_39787796

TGGAATTCATGCCACGAGCAGGTCAGGGACTGAATGAGGTCTCATGTGGTGAAGCGAGTGTGT  
TTTACAAGCTTATGCCACCTAGAAGTTTCCAGTGGCTATTTTCAAACCTCCATGCCTAATGTTCAA  
TATATGTATAATGTAATATTTCTgttagcaaactgaactggggtccacttgccctgacacagtaag  
gcaaa

>chr3\_42322996\_42323196

acagaatagactctttatagcagtaggacacaaagttataaacaggatctgaggccattccaggt  
aagggttaagtcactccctgcccctacacttaagaataaactatgttttaactgccacaaggtt  
tttcttttccctagcagctaaagaagcactgaccttgacataagcaatgggtgaaacaatttaca  
gctca

>chr3\_68396310\_68396510

AGTGTGATTTTTGCTATTGAGTTTCTGAATGATTTTGCTTCTCTTTAACATACTCCGAAATACT  
AGTTGTCTGCTTTACCAGTTCACAGGGATGCCCTGAATGATGTTACAACACCTCTTCCCTCTCTC  
TCTTGCTATCCGCTCCCTTGCTTCTCATTCTGGATTTACCAAGACTAGGTATTCTCCAGGGCAA  
AGGCA

>chr3\_70996510\_70996710

AACATAAGTCATTGAAATCCACCTAGCTGATTCTTACTCATCTTTCACATCTTAAACATATTCCC  
TGATTCTCTCTTGTGAGAGCATAGCTCTGCGTACTGCAACTTCTTGTAACACATGGACTTTCATA  
TTTCTCTGTGAACTGATTAATGCCTGGCTCCCAGCTAGACTGTAAAACACACAAAAGACAGGCTG  
GTTGA

>chr3\_87529110\_87529310

TCTTTATTGTTACACATTTATCACTTGTGTGTACACACACACACACAGACATATGCAAACAT  
ATGTAGAAAAGTGTATAAACTTTTTTCCCTTACCAATAACTTTTTCTCAACCAATCTAAGTCCCC  
ATCCTCCATACAGGAAGAAGCTATTTCTGTAAACAGAAAATTTTGATAAGCCATGTGGAGTAGTA  
TATTA

>chr3\_88989710\_88989910  
GTATATATGCAACTACATGCTCCAGAACTATATCACATCTGTATCAAGAACAGCCCTATGCTTGT  
GAAATCATGTATGACAAATTAGTATTTAGGAGTGGTATGAAATATTTTTCCAATCAACACTTCCT  
TAACTATCATTTCAGTGTACATCTTCACAGTGAACATTTTACCTTAGCTTATAAAACAAGataa  
tttta

>chr3\_106278110\_106278310  
agatcagaaggaaagaacccaaattatcattatatctcaaatatgtgtgtcttcaaaaagaattc  
aagagaatttatagacaaatatggaaaatgaaaagagagttcagcaggtttgcatgatataaacc  
caatcttcaaaactgaatagcactttttaatatcagaaacaactaacttgaaaacattatacttt  
tcaaa

>chr3\_111948310\_111948510  
caattaaaaCAACAGCAATAAAAAATTACCCTCTTGACCCATAATTTACCTTTCATATTAGAATAA  
AATATTAGTTTGGAAAGGTAAAAATTTAATAACACAATGTACAAAAAGAGATTATCAAGCAAAGG  
GTGTATAGATTTTTTTAAGGCTGAGAAAATTGTGTGCGTGTATGTGTGTGTATAAAGAATTAG  
TGGCA

>chr3\_117652310\_117652510  
aagctaataagaggttatgtttcaatgaaggcactggcagaactctctcttcttgggaaatgccct  
accaatatgttcagatttgtaaatttttcaaaagtaaTTTTTGTATTATTTTTCTTAGGAGCAG  
GTCCCTCAAATTACAGAAGCCACAGAAAACACTGACTCTGTCCCTGGGTCAAGATAATAGAGCATGGT  
GGTAT

>chr3\_117862910\_117863110  
tggtcgatttggtgatgcctcataaagttcttgcgctgtgttttcagctccatcaggtcattta  
tgttcatccctaactatttattaccatcttctgaagcctactttcgtcaattcgtccagttctg  
cacccttgatggagagacattgtgaacgtttggaggagaaacaggcactctagccttttgggtttt  
cagca

>chr3\_126967710\_126967910  
ATTGGAGAACATGACCTGATTGGAAGCTCTAAAAGACTTTTCAACATTGTGGTGATTAATTTTT  
AGCTTTGATAAACCCAGCAAGAAGaaagagacttaacttaggatttgattttgaggacatttgc  
caaagatgttaaaaggctgaaaacatttgatcaaaacagaataataatcattgtaaaataatagt  
tattc

>chr3\_157444506\_157444706  
taaagttaaattggactaaatgctccaattaaaagacacagactggcaaattggataaagagtcaa  
gacccatcagtggtatattcaggaacccatctcacgtgcagagacacacataggctcaaaat  
aaaaggatggaggaagatctaccaagcaaatggaaaacaaaaaaaaaggcaggggttgcaatccta  
gtctc

>chr3\_158157706\_158157906  
TCAAAAATTGTAGTATTTCAAGAGTAAGTAATGCCTTCCAAACCTAGAGCACAAAAAaggcaagg  
ggaggagagcactgggacaaatacctaataatgcggtgcttaaaatctggatgatgggttgat  
aggtgcagcaaactaccatggcacgtgtatacctatgtaacaaacctgcacgttctactcatgtg  
tccca

>chr3\_162219706\_162219906  
tgaggaactgggaatctcacaatggaattacacaattatggagaccaagaagaagttccacaata  
tgccttcagcaaagtggatgtaattcagccctgttctgaaggcctgcaaatcaggggagctgat  
gtaaaatcaagtccgagggcaggagaagatatttcccagctaaagtcagtagtaaggaataaagg

ggtat  
>chr3\_164991906\_164992106  
agtctcttttcattgattttTTTTTTTTTTTTTTTTGTCTTAGGACATAGTAAGGGTTTGAATTC  
AGTTCCTGCTATATAAATAATGTTTTAATGATTCATTTATAATGTAGATTATTGCTTCTGCTTC  
AGTTCATCTCATTTCCTTCTTGGAGACATTTCTTGGAGATATCTATAATTCTGTATGTGCGACGT  
GGTTA  
>chr3\_166042706\_166042906  
gttaatttttgtatacggtgaaataaaaaggggccacttcaatcttctgaatataatctagacactt  
atctcagcaccattttattgaatatgcagtcattatatcattgtttttgtcagtccttgtcaaagat  
cagacggtttaggtgtgcagctttatttctgagctttgtattacgttatttttagtctatgtgtc  
ttttt  
>chr3\_182370306\_182370506  
CATAAGCTGTCCAAAATAACCCATTACTTGATAATTCATAAGAATATCCAAAAGTAATCTGATGT  
AAAGTATCTACCCTTACCCCTACAAACATTCCTTTCTGCCCTGATTTGTTCCCTCCATTTATCT  
TTTCTAACTCACCAAAGTATATAATTATCCATATAGAGAATTTGTGACCCCAAATTGTCTTCTGA  
GAAAT  
>chr3\_188687506\_188687706  
gaatataactgaaTAATTTCAACAAATACTAAGTAAGAAAAATCAGAACTATGCATGTCTTCTCTC  
AGCTATGGTTCCTTCTATGTAGATTTCTTGTTTTTTTCTTTTTCTttttttccatccctttacttt  
gactccgtaaactcctttaccagttaggtgggtttctttatgtagcacatgggttgattttTAA  
AAAAT  
>chr2\_2467193\_2467393  
aaagaactacaactagttaaataccatctgagggcaacaagataatgtaatcagtaaagcaacaa  
agaaaatataataataataattgtaacctcaagatgaattgcagaaatgaggactgctgtacct  
tgcataattttcttttttggcttgatagacatatagctatagacatagacatAGGTAGatattgtatt  
tatat  
>chr2\_21087119\_21087319  
CTTTTCAGGTGTTTTTTTTTctccaactttttatttcaaatttatggcagtacatgtgcagatt  
tgttacatgggcatattgtgtgacattgaggtttggagtatggatcctgtcaccaggttaataag  
catagcaccataaagtagttttttaactcagcccctctccgctatcctcaagtagtccacgatg  
tgtat  
>chr2\_32043096\_32043296  
atctcatggcagttttgattcacaatctctggtgatcaatgacattgagcaccttttcacatgc  
ctcttgccatttgtgtgtcttcttttgagatgggtctatttaaataatattgtccttttttaaat  
caaattattagattttttgtacagttgtttgagctccttatatattctggttattaatcctttgt  
cagat  
>chr2\_33978696\_33978896  
ATACTTGGCAAAAAGTATTAATAGAATAAAGGCAGGGTGTCTAATTTTTAGCCTGTTGTTATTC  
GTGTTGACTATATTACATCATGACTAACTACTGAAAAATTATTTTTGAAACATGAGAGAGAACT  
ACATCATGATAATTCTACCTCCATCCCCCAAAAAGAGCCTATCCAAAACCTGAGACTTATTC  
CTAAC  
>chr2\_52533696\_52533896  
TGGGATTGACATAGAtgtgctcaatttcactaaccatttgatgatttttttttgggtggctatctc  
aatcaacaatcccatcagcagtacatgaggtttcacatttgactcagtcctcttaacatcagat

tttctgttctgctgccattctgattgccaaaacagccatatcattcttttaatttgcatttctctg  
cttat

>chr2\_59747096\_59747296

ACTTGTTCATTATAAAAATTAGACACGTGTAAAACTAAACCTAAGCAACTAAGCAAATACTTA  
AAATAGTTTTAGTGCAGCCTATGATGAAAGCGCATAAAGGAAATTACCTACCAACTTAAGGTCAA  
GAAAAATTAATATTGACCTATGGAAGAATTATAGTCTCAGAATTTTAGGATTTGTTGTTCTATTT  
AAATA

>chr2\_77641492\_77641692

gagcgaataacttagtactatgtgaacaGTTTATTTACTTGTGTCAATCATCCTTCCCCTGCCCT  
CTCCCCAGACCTTGTCTTGATAATGGTAGTGTCTTCTTCTGTGTTCCCAATGAGCCCTGTTT  
ACTTCTGTTTATCTCAGATTATTTTGTGTCTTTAATTATTTGCCAACCCACAGACTACCAGCAA  
CAGAA

>chr2\_80037492\_80037692

tactactaggagaacagtatgggggaaaccgccccatgattcatttatctccccctgggtccctc  
ccacaacatgagatgagatgtgggtggggacacagccataccatatcaCTATCCTTTTGCCATTG  
AATTGCCTTTTACCTTTTCTTTTCTTTTCTTTTTTTTTTTTTTTTgttataactttaagtttaggg  
acatg

>chr2\_96275873\_96276073

cttgaatcctttcctgggcaaagtcaaggactctcaaagggttaagccccattttgaggctcagct  
tccttgcacTGAGCTTAACTCACTTTGCCAAAGTGTGTCAATTATCAAGCCTAGTGATGAGAGC  
TTacaaagcttacattttattgagaacttatcatgtggtacgcatgtgttttaaatgcttcaata  
taaaa

>chr2\_116534930\_116535130

TTTTCTAATAGAATTATGTTTTGCTTACCATAGTCCTAGTCAAACAAGCCAGCCATGGAAAGAA  
TAACCTTTCTTTAAAGACCTCTTCCACACTTCACACAGAGACATCTTACACAGAGGGATGTGTGT  
GTGcacacgcacacacacacacataactcacacacaGTGATTGAGAGAGGTTATGAAAAAGGAT  
GATTT

>chr2\_124803330\_124803530

TGGCTTTATGTGTTGGGGAAGAAGGTAGAATGAAGTAATATTGACAGAAAGGCCATTCCTCCACT  
TCCCCCTTGGCAGGCCTCTCACAGAGAGTCTTGCTATGGGTGCCACATTAGGACCTTAAAAATT  
CACATTCCTTTGtttaagaggtgttgtgaatccccctgaaattgtgcactcatcactgtgtgtatat  
ctgca

>chr2\_125731730\_125731930

CACAATAGAGTTTAATGAAATATGATAAAATACAGTAACTTATCTACTAAAACTGGTAATAGCT  
ACCTGATATCAATGTATAATAAATAGGcagtcggttgcactaggcatatttaccgaaaacatttca  
cttaatcctcaaagtaatcattaggtttgatgtttattgttaacatattaaagatgataaaactgg  
aattt

>chr2\_125898330\_125898530

ATAGCTAGCCTTTGCACCTTCTGTGTGGCCCAGAGAATCTCAAGACTTTAGCATGGTTTAAGAGG  
ATAATCAATATGAGACTCCAATTCCTTTCAAATGTAATATTCAACATATAGGTACATACAGACAC  
ATTTACAAATCAGTACCTTGGACTCTATCagcaagagagagcagaaataattaataaaaacagat  
ccatt

>chr2\_138303530\_138303730

ATTTTTTAAATTAATTCAAGACATCCTTTATTGGGATAGGAAAGTGGGGTAATATTGTCTTATTA

CTGTCATCTGTACTGAGAAAAAACATAAATGGATTGAGAAATGAGAGGATTTCTAATTCATAT  
CTATCTGAGAAATATAAGAAAGACTCTAAATTCATTGAGATTTTTACTCTCCAGAACGATTCAA  
TCTAG

>chr2\_164430354\_164430554

ACTTGCCTTTCCAGCTTTTTCTGGCAAGGCTAGAGCTGACATACTGTTCTAATATTCATATCA  
CTTCCAATCTATCTGCATTGTGCAGTTTCTTTTACATGGCACTTGACTTGTTAATATTTTTCAA  
TTATCAAAATCAAAGTTATGTATCAGTATATTTATACAGAAtttcctttttcttctttggcttt  
ttttt

>chr2\_167736754\_167736954

AAGTTGAATGCATTTTTTGTGTTCTGCTTGAGCAAAAATAGAACAACAGATGGCCATAAATTTAG  
GGAAGCTTAATGAATTGGCAAGTTATGACATAAAGTAAGTTGGAATTGGGTAACCTAAATGGCTA  
TTAACAAAGGAGGAAAAATCTTCAAAAATGTTATTTTTTTTTGGAAAATAGAACACATTATAATT  
TAGAT

>chr2\_194022955\_194023155

cttcataatttaaggactcatgtgattatcttgggctcacctggacaattcaggatactgtcccc  
acctcaaaggtccttaacattaatcacatctgcaaagtgcttttgccatgtaaagtgctctcag  
attctgggaattagggatagacatcttggggggaaggaggcattatttgcctaccaAAAGAT  
ACGAC

>chr2\_200497355\_200497555

ACCTCCTTCCCTACTTGCACAACCAAGGACTGAGAGAGAGAAGTTTTCTGGGTACACCCTTTCT  
TCCAAAATCTATCATTGATTGGAAGAATCTGTTTTTCCCACTTTTAACCACATTTTAAAGGCTT  
ATACAAAGTATTTCCCAGTTTCTGTTTTAAGTGATGTCATCCCCAAGAACCTAATATTCAAAG  
AAAAA

>chr2\_212193155\_212193355

CATCTGGGGATCTCGGGATATCTACTCCTTCAAAGACAAAACCACAAAATTTAAATCTAGGATT  
GTTGGTTACCTTAGATTTGAGCAATAAACTAAATATGATGCCAAAATTTGTTAGTGATATATGAG  
GTAAACAGGGTTGCTGTTACAAATCTACTCATTCTGTATCACACAAGAGAAAACAAAATCCAACA  
TCAAC

>chr2\_212872555\_212872755

TTTCCAAGttaaaaaaatttaaacataattttaaaaaGTCAAGGGTCTTCCTTATTCAAGAAAAT  
TGGTTAATTTCTTTAACACAAAATATTTACCATATGGTCATAAccagcactattggcaaagggc  
cttacatatattggatagtcaggaaatatttgatgaatgaatgaaCAGATGCATGAATAAGTGG  
TAACA

>chr2\_213088555\_213088755

ATTCTCTCATTGAACCATCAGTGTGTTGAATTTAGTCAAAGCCTGGAAAATGAATCCTGAGGGAAT  
AAATACTTCGCATAGATTACCTTCCAGCCAACACAACGATTAACAGACATAAGGCTTGTAGTTAC  
ATAAAACATCTGTAATAGATTGCAAAATTTCTGCATTTATCCAGTAGTATTCAAATTTTACAAA  
ATTTT

>chr2\_214831355\_214831555

attttccaaatcttctatggatatacatatgtctataataattagaGCAATAATCCTTATTAAA  
AATAGTGATGCCTTTTTTAGACCTTACACCGTGTTTAAACAAATTTTACTAATTGCTTGGTGGCT  
GCTAGCATGATCATTTTTTCCACAGTCTTCTGACTCTACTTTTGCTGACTCTGCCCTGATATTT  
ATCTT

>chr1\_30955813\_30956013

ATAACTCACGTACCTGAGCAGTCAGAGGCCATTTGCTTCATGGTGATGTTGACTTTTACTGGTGA  
AGAGGCAAAATTTCCCCTACTTTCTGCACTGCACAGTAATGGGGCATAAATTCACGGGGCTTGAG  
AGACCTCAAGGCCAGGAGGATCCCTCCAGGGGACACCCAGCATGGGCGTTCTGTGGGTGCCCTC  
CAGGA

>chr1\_37544813\_37545013

CTGTGGCACAGGTGGCCTGGCTTGATGGCTAAGTGAAAAGCCAGGTGGACGTGAGACTCCTGGGG  
TCTAAAGGCTAAAGTGTTAGCTCTCACTTTGAACTCCAGTGCCGGCACAGGTTCAAGCCCAGAGG  
AGGCATCACATAAAAGGAAGCAGAAAAGTGTGgacttcctgggctccaatcttggtgtgccaca  
cacta

>chr1\_39169813\_39170013

agagagtagcatgggcaaaagtcctcagcagaaaaaaaaaatcataattgtgttcaggatttag  
aaagaagctgggtcttacaggagtagatggatggaagtgagaataactaggggattaagttacgga  
gagaggcagagaacaatcatatcttggtcttatggattatggtgagatatttatattcattttaa  
tgtga

>chr1\_47502813\_47503013

AGCTATACAGAACTTTGTAAAAAAAATCTTTACTTTTTAAATATTATACAATTATGATGAAAAA  
GCAAAATGCAAAGTGTTAGGGAAAAATATTAATGTTAAATTTATTCAAACCTTAAACCTTTTCA  
Attttttttttttttttttttttgagatggagtctctatcactcaggctggagcgcagtgggtgtga  
tctca

>chr1\_55959012\_55959212

cataggataatggcctccagctccatccatggtgctgcagaggacatgctttcactctgttttat  
ggctgtgtagtatgccatagtgtatcacatttactttatctaactggttggtggacactta  
gattggttacatgactttgctattgttagccagtagtTAAAAGCTTCTTTTCATCATCTGCTCTAT  
CCGGG

>chr1\_61183812\_61184012

AGTGGTTAAATAAAGCATGGTGTATTCTTTGTCATAAAAAGAGGAGGACAAAGTTCTGTATGTCCT  
TTATCCTTATGAGGTACAATCATCAAGATATAATTTTCTATTAAAAAGTAcatagctttgattga  
aacagaaacacaatagcacataatataggactcctcttacatggcattcaagaccaggagaaact  
aaaag

>chr1\_66248012\_66248212

ataaagtgggggaatggacatcctattaacaaatgagatggaataattggcaagccacatatag  
aaaaatgaaactggaatgaggatttctcatcttacacaaaaatcaactcaagatggatcaaaga  
cttaaactaagacctgaaaccataaaaattctagaagataacattggaaaaacccttctagaca  
ctggc

>chr1\_74402012\_74402212

tcttcagatcacagacaattcaactatagtaatagaagtttattacggatggaaggttagatgtg  
atggtaggagtttgatgaaattatctctgattgattaaatcttcccaattaaatagaaaaca  
gaccttaactctgatattgtagataaaggaatagttaacagttttagaaaagaggaaattatata  
aaata

>chr1\_89133812\_89134012

CCACTTACCTTATAGAGACTTCCAAGTATGGTCTCTGATGAAAAGAAGGGGGACCTCTATTTAA  
ATGTACCTTTGTGAGGTCAAGTAAGAAGTCTAACCTCTCCTTTCTTGTAAGCTTTTGAAAAAA  
TAAAAGTAAACTCACTTTTTTTGGCAATGTTCTCAACTCCATGGTCATAGGAAAATAGTATATTT  
ACCTG

>chr1\_103170012\_103170212

atatatgtatatataaaagtgcatttattagggagaattggctcataaaattacaagtcaaattc  
ctgtgataggtcatctgcaagctagggaaagagaaaagcctggagtggctcagtctgagtccaaa  
agcctccaaaccaaggaagcaaacgatgtagccctcagtctgaagctgaaggcctgagagcctc  
gggag

>chr1\_104441277\_104441477

TTAGGGCTTAAATATTTTAAATGATTGGGAAGTATAACCATCATTAAAGGAAAGGAAGTAGCTTTGCT  
CCAAGCACACTCTGTCCTGTGATATATCTCAGCTTAGAAGACTGCAGACTAATTAGACACACACC  
ATATGCCTCCCTATGGTTTCATTTACTTTATGTTGGTTTCTATTCTTCAGTCAGAACTGGTAGAT  
GTGTT

>chr1\_107567077\_107567277

CATTAAATAGGGGTGACAATCACTAACACCACCAAAACAATAACTGTTCTGTTGTGATTAGCT  
CTGGAGGACAGCATTGTATGAAATTCCTGCAGCCTCAAGCAGTTCCTGTTGATGGCTTCCATTCCTG  
GCAAAACCACTGAGGATGACTCTCTAATAGATGTTATATCTGCACATATGCTGTTTCATTGCCCTT  
CCTTC

>chr1\_164506376\_164506576

TTAAAAACCTTTTAAAGcagtagttctcaacggaggggattttgtcttctagaccaaggtctaca  
gatatttttgattgtcaaaggcagaagggatgtgcgggctcactggatttttagtgggtagagtc  
cagcaacagtgcaaaatgttttacaacgtataggagaacttcccacaacaaaaaattattcaacc  
caaaa

>chr1\_188082377\_188082577

GTTGACAATATACTGAGATTTAACTACATTAATCCAAAAGttaagccaagtttcaggctttattt  
tttagagaactcaggttaagacaTAATCATATGGTAAACATGATTTTATCTCTTGCTTCTTTTCAT  
TCAACATTTTGTGTCACATTCTTGATTTGATTACTATTAGATATTTTATATCAATATACTATAA  
TAAAT

>chr1\_188445177\_188445377

atgattagtgatattgagcatttattcatatatttggtgacagcatgatgtcttctttcgagac  
atgtctgttcacgtcttttgctgttttttaacgggattgttgttttgctattaaattattt  
aagtcagggtggtgtgatgcctacagctttgctctttttgcttaggattcctttggatattgggt  
tcttt

>chr1\_190372577\_190372777

ATCAAAATGCCTGGCAACATTATGTATTGAAAAGAGGTGCCAAAATAGCATTATCTTAGATAAA  
ATAAAGATATGGAAGCCAAATGGTTTTATTCTATCTTCACTACGTAGCACAGAACAGGGAATGTA  
GAGCTTGTCCCTGAGTAGATGAATGGTTTAAATGATCGCATGAGGAATGAGTCAACACATCAGTGT  
ATTAG

>chr1\_193824777\_193824977

GAACCACTCCTTTACATCATTATTCTTTTTTCATATTATTGTGAGCTCAAACCTTTTCTGTGTTTCT  
ACCTGCATTGATAAAGGAAACTTCATATGAACATACAGAAATAGGGGTGGGATATGTGAAAGGGA  
TTAGTTATAAATCTCACACTGGGCAACACAAGCTTGAGGTTTTTCTAATTTATTTAAATCTCGTA  
TTATG

>chr1\_209434777\_209434977

acagagcgagactccgtctcaaaaaaaaaaaaaaaaaaaaaaagaaagagttttgataacttattga  
ttatttctggtttaacggtaattttggagggaaaagagctggattattatgtctattttctaaaa  
ttaactgaggtttttctttgtgttttaacgtacagtaaatgtctacaataaccaaagcactag

gaaaa  
>chr1\_216546377\_216546577  
TCCCATGTTTATAAAGAAAAGTCTCTTCATACTCTCACTAAAATCCAATCACTTGTGGAAAAT  
GGTCTGTGTGTTGAATATGAAACAAGCACATTATGATATGCTAAGTGTGATGCTACATATACTA  
CACATAAGGGGTATataaagcacagaccttttcttcaaggaattacaatctgtaatagaaatgg  
cgtat  
>chr1\_216615977\_216616177  
tccagcctgggtaacaagagtaaaaaactccatcttaaaaaaaaaaagaagaagaataaaaaagaa  
ggaggaggaggagggggagaagaagaatgggggtaagcaaagaacaaagaacactaatggacac  
caagatgtaataaagctagattaagatagtgacactgatgaaagaatagaaaaatgcaccaa  
agaaa  
>chr1\_218064777\_218064977  
aataactttagataaaaggagctcacttgcttactattagagaaaaagttgcaaataagcagg  
tagaggtgcaggggtgggggtgtgggaaggctggaataattcccattgtggtggcttaaatttg  
agatgtcagcttgatcttctttaaacaatataccaatagataaatatgaagtaaagtagatatg  
tgttt  
>chr1\_223032977\_223033177  
tgggagataaatttgagactatcttccaaaagcagatttaaaaagactaagagatagaaaataa  
agtggagatgtaaaataaaagaaaatacaattagaggaaaactatgctctccaatgtttgactag  
tagaggagttccagatagagTTTGGGATGAATTAGTTCTCCTAGTTGACTCTGTAAACctagact  
gtaaa  
>chr9\_19032000\_19032200  
atacatgatcttaactcttacaatagtcctatgaggtacgtattggttggtacagatgaggcgact  
atgacctggagtttagttaccaatctaagatcccacaattaatgacagcccaggaAAGGTGACCT  
CAGAACCTCTTGCCTGTTGCTCCTCTGCTGCCACTCCCTGCCCCAGCCAAGCAGAAACCCAGC  
TGCCC  
>chr9\_24439000\_24439200  
CTGAACTGAATATCCGTTTGCTGTCCATCAGCATGAAGCCTTGTGTGTTGTATTGATGACACGAA  
ATGGAAAGCATCTCAAGCTATGAGGACTGAAAAAGAAGCCAGGAACCATGAAGTTCTTCAGGTTG  
GAGCACATTGTTTCTTCTCATTAGGGCAAATTATGAAAAGAGTAGGAATTAATTTTCCAGCATTG  
TGTAT  
>chr9\_24981000\_24981200  
CACTCCTTCTGATAGCTTATTGAATAAATAAGTGACAAAAATAAACCCAGACATGTGGATTGTCT  
TTTTTCATTATGTATTTTTTAGAATTAAGAGGTGGCATAAGGTAATACAAGtggcgttgaagata  
cgaaagatgagtttaagtcaggctctgccacttaggggcatgtagcttaagttagtcacctcac  
ttctc  
>chr9\_25052800\_25053000  
CTTCTGACACTCTTCATTTTCTTTTTATGGGTTTTTAATTAATTCATTAATTTACCTCTCAGCA  
TGAAGGATAATGCTCATTGAGGTTTGGCATTCTCCATTGGCAAATTGTTGTTGCAGAGGATG  
TTGTCGGTTTGTGTTGAATTTGATAAAATATCCTATTTAAATATTCAAATTTTAGATTCATAGA  
GCTTT  
>chr9\_39063800\_39064000  
TAACTGAGAAGTATGTGAAGAGAGAAAGCATTGATGATATTCATCTGAGCAGCTTCTAGAAC  
TGATCCAGTCAGACTAGAAAAATCTACCAAGCTCAAAAATCATCACACaaaaaacaaccactta



gagtctctggaactgtcctaaCAGAAAATGTTTTGAAATGGCATTATATTCTGTTGGACCTAA  
TTAAA

>chr9\_39825000\_39825200

tctcgatctcctgacctcgtgatccgcccacctcggcctcccaaagtgttgggattacagggctg  
agcctccacacccccgccGGCAAATAAATTTTTAAAGCCCTACATTCTTGGGCAAATTTTACCCTTA  
AACAAAAATTCAGCCAATTGTACTAATCCAATAAAGAGCCATTTTAGGGAGCCTAAAGTTTTTTTT  
ATGAA

>chr9\_42027400\_42027600

ccattttaacaagtgttggaaattttttatattagcaGAACTAACAAATTGTTTGCGAACTATTG  
AAATAGAACTATTCTATTATGGCCTGCAGATATTTTTCTCAATTATAATTCACTTTCATACTGTA  
AAAGTATCTTTGCTTTGTGTATATCTTTTTTCATATAAAAACTTTTAATTTggcaggggaatagtg  
ctcat

>chr9\_46945780\_46945980

tcaacaattattgtagagtgtagcacacctcctcatgggccacactttataacctcacctttagg  
ggcccgctgagatgagtctagttctagatccagaagcaaagaaagatggtagacatggttcctga  
gaatattcagcattttcttgatggcagcttcctcaggggaggccactaaaatttcatcagtcact  
aagag

>chr9\_68172580\_68172780

TGGATTTCAAATCTAAAAATATCATAACATAACTTCAGGGAAGAGTAAGAAGTACTGGTGTTCAT  
TTTTTTCCTTTTAGTAGATTAGTTGAAGAGGTAAATTGAACATGGACTATGTGTCAGACTTTTTT  
TTCCAAATTATATTCTTAAATGTATAGTAAAACATATGCTAGAGGCAGTTTTTTAATAACAAACA  
ATATT

>chr9\_78741580\_78741780

ttaagtgaacatgtcagacacggagacaaaatactgcatgttctcacttaaaagtgagagctaa  
gtaatgtgtgcacatggatgtcagagtgtgggatgatggacaatggaggatgagaagtgggaggtg  
gtgagaggggattagacgatgagagattacctaaggggtacagcatactttatttgggtgatcga  
ttccc

>chr9\_89122380\_89122580

GGTTAAACCCTGGCCAGTACACAGAGACCTGGGAACAACCTTCCCAAACAACCCTTAAACAAAT  
ACTTTCTGCTTTAGAGGGAGGAGCCGAGAGGAAGGGAAGGACACACACAGCATTAAGTGGCTG  
TGGGTATTTGATCAAACAGTTATGCAACTGATTAGAGCATTTGACAGAAAATTAATGAAAGATTT  
TGTTT

>chr9\_91209180\_91209380

actgtgtggatataatttgtctctttttcatttaatttcccttgcatatacttttagaagtgga  
acgactaggtcagagatttaaataatttttaatttcttgatacacattgttaaattctcattttc  
agatatgttgtcccaattctcaatttcaacaatagtagagtgagtggagtgaggcttcctatgcc  
tcctt

>chr9\_102258779\_102258979

acacaatTAGCTTTAAATGAGAAGACATTTTTAAGTGTCTTGTAACTGTAGACTTATATACA  
AATACTAGGTAATGATGCTGTCTGTGATAAGGCTCGTACAATTTCAAACCTAACACTTTAACTTGA  
ATTATGACTTTGTCAGCTCTATTCAAGATGTAATCCTTGTGAGCTTCTACAGAACTCAAAGGCA  
ATGTT

>chr9\_105086179\_105086379

aagaatataccttaagcttgcaatagagaaatatatttccgcacaaggtgataaaccagcacgg

gctatgtgagctctttatctccttgtaagaaagtgatttaggtccaaggtccatttgtacatagc  
caagcaggcgtagaaagactgtgcatatgagaatgccttttggaaacaGGTATCACAAAAAGGAAC  
TAAAA

>chr9\_105386779\_105386979

cacagttccacatggctggtgaggcctcacaatcatggtggaaagtgaagggggagcagaacaca  
tcttacatggcagcagagcaagcaagagcttgtgaaggggaaatcccatttataaaatcatcata  
tcttgtgagacttatttactactataagaacagtatagggggaactgccccataattcaattat  
ctcca

>chr9\_105778179\_105778379

TCAACTTCTAATTCCCATTAAGGCTCAGGTCTGGAAATtatatatatatcttaattgtatatatat  
aatatgtaagtatatatacatacatatgtatgtgtatatgtatCAATTATCTATCTATATGGATT  
TTGATAGATAAATTGGTAATTCACAGTATCAATTATATATACAGATTTAGATAGATAAATTGATATT  
ATCTA

>chr9\_107303179\_107303379

AACACTCTCCTGCCACATAACTTTTAGAAATAGCAGCAGATGTTCCACAAACTTTATGAAATGT  
TAGAGCTCCCTAGTTTAAAAATATATCTACCAAAGCAAAGTTCGTTCAAAGTAAGAGATTAATAAT  
TCAAATCATGATTACTAAAATGTAATGCTAGAAGTGAAAAATGATGTAGATATTATGAATGAAAT  
AAAAT

>chr9\_108613979\_108614179

aatatggcaccatagcacaagcatcaaaaggaaaaatatagtttcatcaaaatgaaaaaccttt  
gtgcctcaaaagttttcaaaggacaccatcaataaaatgaaaagataatcagttgaatggaagaa  
aaatatttgcaaatcatatttctgtcatttgtatttagaacatataaagagctggttacaattcaa  
taata

>chr8\_15800429\_15800629

tctctactgttttgcaagtttgacattccacttctctttttcttagtgcttgttcttaacttttt  
aacatgcataTGTGATGGGTCATTGAATAAGCAGGAATCAGAAATCAACTTTATATTTGTCTTTT  
CTGCCAATTAAACATTGATGAGCTCTCTTCCCTGGTGCTGCCAACCGAGGTGCAAGCCATCTCCT  
ACTTG

>chr8\_47635835\_47636035

gattccaccctatgacctaatttctaccaaaggcccaacctcctaataatagcattacattaggaa  
ttagatttcaacatatgaatttgggggatgcaaacattcagtcacatagcCAACAGTAAACCAAAG  
ATAGCTCAACCACAGACCCCAGCCAGTGGCCTATGGCTTAGCTGACTCACTTATATTTACACTTC  
AGGGA

>chr8\_51760847\_51761047

TCACTATTGTTCTCTGCAAGGAAAATGTACATTTGCTTAGCCTCATTTTCTGAACCATCTATCTT  
CTGTGTTTTGAATTGTTTTCTGTACATGTACATCATACTGTATCCAATCTTTATTTCTTTCTTC  
TGTATTTTGAAGTTTTACTGAAACACTCATGTTTAGTATCAAAGCATTTTCATATACTACAGGGAC  
ATTTT

>chr8\_65357646\_65357846

tgtgcatgtagagcttggaaagaccattaaaatgatctcagtcacttttttcttttaaacct  
agtgaccttttcaaagttacacagcaagtaataagatgagagctggaatccaaattctacaatct  
acacacatgccttcttcttgcaggctactctCTTGAAATtcttcttccatcctccttttctc  
cttct

>chr8\_69789246\_69789446

TCATTTGGAGTTCCTGTAAACAATTTGTTCTCATTTTCTTTTGTACATAACTATGCCTCTTAATT  
TATTTTCATAGAGATATCCAACATGTCTAGTTTTTGTGGATCATATTTTGAATTAATAGCT  
CTCTATGCATTAGGAATACAATGGAATAATTCAGGCTGACATTTTCTTGGCGGACAATGGCACT  
CTCTA

>chr8\_75885245\_75885445

TCTTTCATTAGAGTTCTAAATACTCAACTTTTAGATGCAATAAATACAAAGTTAATTGGCTGAAT  
TTTATTTGTAAACTTATTATTCTATTTAGAAAAGGAATAATTTGGCTATAAAAACATAGGAAAGA  
ACATAGAAAATATCCATGAGTTTTGAGTCCTCCATTCTTTTGAATTTGTTAAGTTATATTGGTTA  
AACTA

>chr8\_76915245\_76915445

AGAGGGACTTTGTCTTTACCCAACATTGAGAAAACATCTTTGAATCATATTTTCCCAGAAAATAT  
TATTTTCAGGTACAATAAGCATATCTTCTAGCATAAAAACTGTAAGTTATGAAATCCTCTCATGT  
CTTAATATAGTAAACATCAATTACTTCTAAAAACAATTATACTTTTATTTAAAGTACCACAAGGG  
GCACT

>chr8\_118157219\_118157419

GGGGATAATCTCTCTATGTATCTGTTAAAAAAGAAATACATAGTTTGATTACTTTTGGCAACCAT  
CCCCTACCATGGGGAAGATCAGCTTGAGGTTGAAGAATAGCTGAGAGCCACAGAGAAATGAATC  
TGGAGACCTCGTCAAAAAGTATctgaaacctggcccctctagatgttttcagttgcagaaccaat  
aattc

>chr8\_129767418\_129767618

tagaatagaatagcaggtagatttctaaggtttttgacttcaactcctgcctcccagacaaaaac  
cctgaaccacctagagcataggggaatttggtgcctgaaaggaaggatataaacttggcttgc  
tttaccacctgctgactgtagagctctagggctttgagtgaacacagatggtagtcaggtagtg  
ttaca

>chr8\_136843618\_136843818

tgccaagtgcataattgagtgtctgctatgtgccaggcattgtactggttaaggcaatgtaatgag  
agagacacgatgtctcccagaagaagctcacaattaacgggtgagaaaaatatgtaagcagaa  
aactactgtgattgtgtaataaaaaaaaaaagggttaggggtatgcctgagggccatgggaacacag  
aggaa

>chrX\_10705600\_10705800

ATGCAAAATGGGAATGCATGAGACAGGTGGGAAAGAGAGGGAGAAAGAAGAAAGTGAAAGGGGGT  
GGGGGGAGAGGACAAAGAAAGAAAGCagaggagagaaggaaagagaagagagaagaagGGGGATA  
GAGTGGAAAGGAAGGGTGTGAGagaggagggaggaaagtgaaggctggagaagaaaaaggaggaa  
agggt

>chrX\_26841679\_26841879

TCTGAAGGGGTTAAGTCAAAGATATATGGATTCACTAGACCTAGAGTCAAGAATTTTAAAGAAA  
CTTCTCTAAGTTTTGGAGTGTGAATATAAtaggctaggttccctcctagaatatatactggaataa  
ggatttgtatgaaagtagtttatttggaaacataatcctgaaaacaccgatgctgaggagagata  
tgaca

>chrX\_29179079\_29179279

caggagaatcgcttgagcccggaggcggaggttgcagtgagcagagaagattgtaccactgccc  
tccagcctgggtgcaaagcgagactctgtctcaaaaaaaaaaaaaagtgatgataactgttttgat  
acagcaagtggatggatggaagaagctctatgagtatacagcagggatacatggcctgggaggaa  
aaagg

>chrX\_40761256\_40761456  
aagtaaaaggatggaaaaagatgtataatacaagcattaatcacgacgaaataggaaaagctcta  
ttatatcagataaagtagactgcaaagaaaagaaagttaccacagacagaaaaggacattatata  
atgataaatgggtcagtacaccaaaggacatagcactcctaaaatgtggtttgcactaagtaaca  
gagca

>chrX\_51857460\_51857660  
agcaagactaataaagaaaaaagagagaagaatcaaataagatgcaataaaaaatgctacagggg  
atatcaccaccgatcccacagaaacacaaaactactatcacagaatactataaacacctctacaca  
aataaactagaaaatctagaagagatggataaattcctggacacatacacccctcccaagactaaa  
ccagg

>chrX\_57739475\_57739675  
tatcatgaaaatggccatactgccaaggtaaattatagattcaatgccatccccatcaagctac  
caatgcctttcttcacagaattggagaaaactactttaaagttcatatggaacaaaaaggagcc  
cacattgccaaagtcaatcctaagccaaaagaacaaagctggaggcatcatgctacctgacttcaa  
actat

>chrX\_74152875\_74153075  
ataaatctctattaagaacttatctttgtgtattatgtatttgggcatgtgtctgctccac  
attggactgagaatttctagctcttggagggtagggaccttgctgccttctctttatctttcat  
tcttttagtactgccaggcacttaCATTGAAGAATAAAATGTCTTAATAAGTGAATGAGCTGGA  
GATTT

>chrX\_78569744\_78569944  
atgacacagaatagccaaagctatcctaggcaaaaagaacaaaactggaggaatcatggtaactg  
actctaaattatactacagagctatctatagtaacaaaaacagtatggtactggcatgagaaca  
gacacataaccaattgaacagaggaataatccagagataagtccatacatctacagtaaactc  
atddd

>chrX\_78755344\_78755544  
cacaatagcaaagacttggaaactaacccaaatgtccatcaatgatagactggattaagaaaatgc  
agcacatataccatggaatactatgcagccataaaaaatgatgagttcatgtcctttgtaggg  
acatggatgaagctggaaaccatcattctcggcaaaactatcacaaggacagaaaaccaaacca  
catgt

>chrX\_86297744\_86297944  
CGTGAAACATTAGCCTGCTGTTAACAAAAGAGGGGACAATGTAAGGTGGCTAAGAATAAATTAT  
GTCCACTATGTGGGACAGTCAGAAAAGAGCATTAAATATTATTGAGTCAGTGGCAGCGATAAAGCA  
AAATTTTCTATTTCGGTTGCCAGGAAATATTTTAGTTACAAAAGATTCCTGTATCTGCTTTTGA  
TATTT

>chrX\_89881344\_89881544  
cagcagcaatcaccaaagcagtatataaatgtcccctgattcattttcctcttctaaattdttca  
ggcaacacgtaacagtcagtatcaaatttacttatataactttagtgtaaaaggggtcttgatat  
agagtcattagttgtctagcctcagcactactagaaggaaacttaaatggGCATTTAGACCAAATT  
ATACA

>chrX\_92465944\_92466144  
AAAAGAAAGAAGTTTACATTTTAAACAAGAAGGGAGAAAGACAAATCTAGAACAAATGATCACAA  
TTGCCCCCTGATTTATAAATAGCCTAAAATGTGTTTAAAGTACTGACATGTCCATGGGAGTACTA  
TGCTTGTTAAATGAAGGGAGGATCATGAATTATTTTAAACCTTACTTGAAGAATTTCTGAATGACT

CCATT

>chrX\_94767744\_94767944

AACTACACTATGCTCTATGAACATTTTGTGTTATTATGTGTGCCCTTAGACATCCTGAATTGCAA  
TCAAAATGGTAACCAAATAAAGTTTTCTGTTTGGTGCTTCCAGTTGAAAAAATTACAAAATTA  
AGAAAATAACCCATAGTGTGTTTTGCACAGTCCAGTTTTGCTGATACCATCAGCAAAATCTTTAG  
AATAG

>chrX\_95212544\_95212744

tgtgctgtagcctatacagccaaaaagggtggagcttcccaagccttgggaggccacccttgctc  
cagtgttgcgggatgtgatacatggagtcaaaggagaatatttcagagctttaagatttaatga  
ctgtcctgctggcttttgtacttgcatggggcctgtgatcatcttttttggccaatttctccca  
tttgg

>chrX\_96843344\_96843544

ATGCTTAGTGCTAAGACTTCCCTTCCACCCACACTGCCTGCACTAGGAAGGGAAAAATTAACCC  
GGAATGCATGCTTTACTAAACATCGGTCAGTACCTTTTACCATCAAAGGACAGACTTTTTTTTTT  
TTTGAAGTCTCATGTGATTTTTATCATTGAAGTAAACTCTCTCCAGGTGATGTAATGACATACC  
TCCTA

>chrX\_103146544\_103146744

attaggtatatctcccaatgctatccctccccctccccctccccaccacagtcccagagtggt  
gatattccccttctgtgtccatgtgatctcattgttcaattcccacctatgagtgagaatagc  
gggtgttggttttttgttcttgcatagtttactgagaatgatggtttccaatttcatccatctc  
cctac

>chrX\_114309944\_114310144

caccagtcctccacttgtgtatggccatctagatctccagaaatacatcagaacttttcaaga  
caccttggacatctcattctccaaatttttatgttttggggcctactgtttgtttaaccaact  
gttgcctgatgcctcaagaaactgtgatgtcaaataattgcttctaatttttaatggaaaatac  
ctgga

>chrX\_138335134\_138335334

cctttcaaatgagaggacctgtggtccagaaaaggcagactgaacctgcatttcttctc  
tgtcctccaaaagctggtgcaaatgtgggcatagtcattgggaaatgcacagtagtgggggt  
aaagacagccttagctactgagccagaggacaaaaaaggagggaacagggaaacaaaagtacct  
gtaag

>chrX\_139282734\_139282934

tcttgcttttttcaacttaataacacatggaaccacctcatTCCTTTAAGTGCTGGCATAAA  
AGGCCATGGTTTAGATATGCAGTTCCTCAGCCATACCCCTTCTCacaaacatgccttccatttc  
cagtgccttttatttctgtggagtagattcccatgagtggttcttaggacgaaatgtagctata  
tattt

>chrX\_146723908\_146724108

ataccagattatgtagatactccattctcaagggttttagaacatttcatccttcagtgtgagct  
gtgtatagtgacttccctcctaagagtataatatacaattttaaaaactaaagatgagtagaact  
acaaggagaaacctaccaaacactactctaattcccggatcaaggcaacatcagtagtaataca  
tcatg

>chrX\_150636942\_150637142

ccttgtttttgaagaaatttctactggatacagaattataggatgacagttatgtttttactc  
aagactttatgtttaagcatcactgatgtcttgtttccaatgagaaatctgttgcctttgtttt

tctttattgtatcttttttttttttttttttttctttatcttctctgtacataacatgtcttttt  
tgtcc

>chr13\_19369400\_19369600

gcagtgacagaaaaatatatgggcttgaggacccacacaggaggttaccaacctccagaccca  
gattcatagacgcatcagcagcttgactctcagtatggaaaagctacaggcactcaacaccagc  
ccagcccatgagagcaacatggggctaaagccttcaaagccacaggtgcactgccctggtatag  
aggtt

>chr13\_19603200\_19603400

ggtcaggctggtatcaaactcccaacctcaggtgatccacctgccttggcctctcaaagtgtg  
gatcataggcatacagtgacgagggtagtttttttaagaaactaaaaatactactcgggatagga  
atgagagctgctgtgcccagccagcaggtccacttctaattctagttcacttgctatttccact  
acatc

>chr13\_44153400\_44153600

ggttttaggagtaagttatctgtaccagaggtgttcaaacagaaataattatccacttgatgga  
gatattagaagaagatttatgtatcagaaatccaattacattagataacttttaacagctccct  
ttctactctTGCAGTGCTAAGCTCCCATTGTGAAGCTGAGAAGTACACAGTACACTTCCC  
AGATG

>chr13\_51140599\_51140799

cctcagaggtctctgaggctctgatttttttttagcctcacaactctttgtggtttatttaga  
caaattctattcttaggtctttttgtacaatatagaatctgacgttcatccattcagtaaat  
tttacttcaaataattatattttttatccctggaattccactgggttcatctaaatttcttcca  
tttct

>chr13\_63360399\_63360599

AACAGATTGAAAGTAATCAACACTTTGCAGAATAATCCCCGCTTTTTCACTTTACTTATTCATGG  
TAGACAGTGAGGTTCTAAGAAAACTTAGAACTTAGATAGTTAGAGGTTAATAACACTTGCTCT  
GTGCTGATCCTGGCTAAAATTGTGACTTGGGACAGTTATTACTTGTACTTATCTATCAAATTTG  
GTTCC

>chr13\_72034399\_72034599

CCACATCTTTTCTGTGTTGATTTATAACCACTCAAGCATTAATTCATAACATTTTCACTGTGT  
AGATAAATGTTATCAGTGTTTTTGGAAATAGTCAGTTGAGACTCTTGTGGTGAGTGAAATTAC  
GAGATGAGGAAATGTAGAACTAAGCTAAATACTATTCCAGCTCTTGATCAAAATGAGATTTGT  
TCTAT

>chr13\_72496599\_72496799

GTAGCATCTGGATAGCATTACAGGCTAGCAGTTCATTGTGTTTCCTACTCACATGTTGTTCCCTG  
ATGAATTATTTTTAAAGTATGACTAAATTATTATTATACAAGATCACAATTATTTATGCAACTG  
AGGTTTACCACTAACATTCCAATATGGATTGTTTTAACTATGGGACTTCTATAAAGCTTCTAAGA  
AATAG

>chr13\_75010799\_75010999

CAACCAAGGTAACATGAACACTGAGAGATACTGGAGAATTTTTTTATTATTCAAAAATATAATGA  
ATACACGAATCATTTTTTGAAGATACAAGTGATAGAAGTACAGACTACTGGAAATGAATAAGACT  
TTCTCTAAAAGAAAATGAAAATGTCGAAACAAATCGAATAATGTGAATATATCTTTAAGAATTTA  
GATGA

>chr13\_83420399\_83420599

ccagtgactccagcctggggtacaggagtgaaccctgtctcaaaaaaaaaagaaaaaagaaag

aaagaaaaaagaGAGAGAGAGaaggaaggaaagaaggaagaaacaaaggtaggaaggaagga  
aggaaggaaggaaggaaaagaaggaagggaaaggaagggagggagggaggaaggaaggaagaa  
gggag

>chr13\_104237999\_104238199

aaagataaattaggaggagatctcctttctaggatctgccaatcAACATAGAACTTATATAGAGT  
GCACTAAGTATGGTGTATGCTATAGGGTAAGGACAAGGCCACCAACTGGAAGTGGGTGAATATAAG  
TGACCAGCTTTGTAGAAGATACTAAATTCTGGGAAGCATGTAGGAAATGATATAGAGGATAGTTT  
TTCAG

>chr13\_107290399\_107290599

TTCCCATGTCTGTGTACTGAGCAGCAAACCAAATTCACCATGCTATCCAATTTTCTCCATCTTTC  
TCCCTTCCCAAATCCCTTAATAAGGCTTGCAATTTTAACTTTTCAGTGTATGCAGCACACCTAG  
GATGTTTGAAAATTAGAATTTTGTGTGAAAGCATTATAGTCACTTTCTTTTTGAATTATTTTCAT  
CCTTC

>chr12\_4899139\_4899339

agcattttgagaggccgaggtgggagaatcacttgagcccagagtgcaagaccagcctgggcaac  
acgacgaaactccgcctctacaaaaaatgcaaaaattagccagatgtgttgcgagctctgtaa  
tcccagctactcaggaggattgcctgagcctgggaggctgaggctgcagtgagctgagattgcac  
cactg

>chr12\_7668133\_7668333

ataccaattcaaggttagacaggaaatggctggacagatgtccttgacagaagtatTTTTgtgtgt  
gtatggatgtgatggccttgtgtTTTTTgcagTTTTTgtgataatTTTTgttatcaggcattta  
tgcatagagaaccctctcttcacagcctcccagctctatTTgtcagggttGTTCTGTTTGGTT  
TGGTT

>chr12\_9727733\_9727933

AGTTTTTCAACACCAGAATCCTTGCAATATAACCTGACAGGGCTCCACTTGAACCTGAAATACAA  
GCCACACTAAGCTTCCAGGTCTTTTTGTTATTGTCATTGTTGTTTCATGCTAAGACTGACTGTTCC  
AAGCTACTGCTGTGGACTTTGACTTAAAAAGAGGAGTGGGGAATATTCTGAAATGCTAACTTAAA  
AATTT

>chr12\_33496533\_33496733

AAACTGTCTTTTTTTTTTATTTGAAGAAACAGTAGAATACTGTCTTTTACTTATTCCACATACAAC  
TATGTTATAGGAATAAAGGAAAAATATACAATTATTTTAAAGTATTTTCCTTCCATTTCCACTTTCA  
TTGCATCCCTGAACTCCTTCTCCCTTTTGCTCTGGGTCACAGTCATTTTTTTGTGTCTATAAGAC  
CCTCA

>chr12\_40316933\_40317133

TGTCCCTCAAAAATTGGAAGAAAAAATGAAGGAAGaagaattgaaaacagtgattcaagcaata  
cttgtatcctaagatcattgcagaattatttacagtaataaaaagtggaaacaacacaagtgctc  
caacaaatgaatgaataaacaacaaatgtggtaatccatgcaatgtaataactattcacctatgaaa  
ggaac

>chr12\_72129533\_72129733

atTTTTgaaagacattttcactggtagataattactgggtgaaatTTTTTcttttagcacttta  
aagataaccatttgattgtttctggctctgcataacttctcatgagaaaattgttactttttaaa  
aatctttgttcctttggctacttttctcttcactggtttcaacaatttgaactgatttcctt  
ttatg

>chr12\_73641933\_73642133

gctcaagctgtaccttggttcatttttagccatggctagagtggctgggacacaggacaccaacct  
aggttgcacgcagcaggggggcccctgggcccagcccatgaaaccattttttttctcctaggcctc  
caggcctgtgattggaggggctgccacaaaggtctctgacatgccctggagacttttttttaaat  
cttct

>chr12\_74290333\_74290533

GGGAAGGCTGGATTATCAGTCCCTACAGGACATAAGCCATGATAGATAAATTGTGGTAGACCTGC  
ACCATGCTGCCACTAGAGCAGAGCATGAGAGAACTCATAGGAGTTCAGGAGTGTGGAGAGATA  
TGTGGAAATAAGTACTCAAGCCCCACCTCTCATCCCAAGAAATGCTGACTGCTGAAGACTACTGGC  
TGAAC

>chr12\_74577533\_74577733

TTGGACAGGGAAGAAGTATTCTGTTTTGTACAGTGTATTTTAGGATGTTTTGTTTCCAGGTGA  
ATATGTTACTTGAAGAGTGATATATGATCCTGAATAATAGAGGAAAATGTGAAGTCATCAACTT  
ATAAATGTAATTTTTAAAATGCATTTTAAAAGAGATTAGAGAAAAATAAGTGTGAGTATTGAGCT  
CTAAG

>chr12\_88848669\_88848869

caggaagagctctctctttcttcttcttctttttttttttttttttttttttttttttttgagatggagtc  
ttgctccatcaccaggctggggtgcagtggcacaatctcggctcactgcaacctctgttaccag  
gttcaagcaattctcctgcttcagcctcctgagtagctgggtttacaggtgtgtgccaccacgcc  
cagcc

>chr12\_107998070\_107998270

aaaattagctgggcatgctgatgcatgcctgtaatccagctactcaggtggctgaggcatgaga  
gtcacttgaacctgggaggcagaggctgcagtgagctgagatcgcaccactgcactccagcatgg  
acaacagagagaaaaaaaataatgagccaaggtcctaaacatgtcatttctcaaaagaagacat  
ataaa

>chr12\_117008217\_117008417

gagcttgtttaaagtaggctaggtgatatggttgggctgtgtctccacccaaatcttgtcttgaa  
ttgtagctcccatcattcccatgtgttgtgggggaactcaatgggaggttaattgaatcatggggg  
cagtttccccatactgttctggtggtagtgagtaagctcacgagatctgatggttttataagg  
ggttc

>chr12\_118339417\_118339617

ACTTTTAAAAATTAAAACGCAAAAAAGAAAAAATTATGACAAACAAAGTATTCAGTTTTTTTA  
AACGTGGAGTGTGGTTGGTTGGCTGTTTTAAGACCTTACATTACCATGCAATAAGAACCGTCATT  
TCCAGTCAGCCCATTATTCTTAGACCTGCGAGGCCATCACATATGCCGCTGGGTGGGTTTACGAG  
GGTTT

>chr12\_119438217\_119438417

TCACTGGAAAAGAAAGGACTCAGACCAAGGACCCGTGAACTTCCAATACATTTGACCCCAGTGA  
ACCCTGTGTTTCTCGTACTGGCCCTGTACTAAAGACCTCAGTGTCTTGGTCTCCATTTAGGCA  
AGGTCAGACCAGAGATTTAGTCAGAATTGGTTTAAACTATTTCCAGGTGGAAGAGGCATCTCTGG  
GAAAA

>chr12\_119460617\_119460817

atagaagtccagaggcagagttggttaattgagcaactcaactagacttcagatttggtctctgcc  
attctcaggggtgtaatgatgtttcccctcaccactgcaagagggtgcagtgctctccagccatt  
gcatgaagacacaatgagcagagcatctctttttgtgtctttttgagaacaaacaaagccctctc  
ttgaa



>chr12\_130436847\_130437047

TGCAGACAGGAATAATGGCAGAGGTGATGTTGGGGATGTGGTGTGAGAATGAGGCATACATCCCA  
GCCGCTGTGCAGATGGAGTCCTGATGCAGTCTGCCTGCGGGTTGCTGGTGTGCACCCCTCTGATCC  
ACAGCAGAATGGAGATGAGACCACATTTTAACTTTCTGGACCGGAGCCACACAAtctgcttttg  
agtgt

>chr12\_131109247\_131109447

ATTTAATTCACITTTAACTAGGATTATATTTGGGtttctttgagacggagtcttgcgctgttgccc  
agaatggagtgtcatggcactatctcagcttactgcaacctctgcttcccgggttcaagcaattc  
tcctgcctcagcctcccaagtagttgggattacaggcacacgacccccagcccagctaatttttg  
tattt

>chr11\_5993424\_5993624

CTGGGCACACATGCATGAAGTTCAGCCACAGAACACATGGGTCCCTTGTATGCAATAATATGA  
GATTGCTGAGACTGCAGAAGAGGCTTCCAGCAGGAAACTAGGATTCTAAATCTTCATGCATTG  
GTATCAGAGCCCATTGACTTTTTCTTCTTTTTTTCATGGGGATTAATATAAGCATGAGGAGAAAGT  
CTCCT

>chr11\_14963824\_14964024

ctttcattcattctgcaagaacagtttagctttggggaagggtattatttaactataagctaa  
attcctccccaaggctagttgacctatgaccaggaatggataaggacaatttagaggtagagg  
caagatggagtgggttaggtctgatgtctttcactgttaggtctgatgtctttcactgtcataat  
ttcct

>chr11\_29928224\_29928424

cacataaagaagtctagaccagctagaatcatgacaggatcaagtgtacatgtaataataactaac  
tttaaagttaaaggataaatgctccaattaaaagacacagaatggcaagccagataaagagcc  
aagacttatcagtagtctgtcttcaagagacccatctcacatgcaaaaacacacatatgctcaa  
atata

>chr11\_32244224\_32244424

gtctctaaagaaaaaaaaTTATATTAATATAATGGCCATCATTCTTTGATtgtcaggcaccgtgt  
taagagattattataaacattattccagctagacctcacaaggaaagactcattcattccttaa  
acaatgaggaaactgaggcagagaaaggctaaataccttggttcacactagttatactagttat  
agagc

>chr11\_37247624\_37247824

TGGACAACAGTAAACTAtggagacaaagtttgtgtcttactgcattttgtatatgtaatacctaa  
cttagaatgtgcttgaatacgtgcatgcataaatgaatgaatGGATAAACAAATGAAATACAATT  
CAATTACAATACAATGTGTGCGCTGGATCTTATTCTGCATTTATTCTTAATAAATGCATCAGATG  
ATGAT

>chr11\_41321024\_41321224

GATTTTCTGGTAGTTTCTATATCCAGTTATCAATCTATATCCTATAGTCAAAAAGTCACCAGTTT  
GTTTGATCTGTTATAAATACATGAATGGGAAAATAGGATCACTAAGTTTAGGAGAGAGGGTATTT  
TGTAATAAATAAGTGAATTTATGATCCATCATGAATTTAGAAATATAAAAGCATTCTAAATTATGC  
AGTCG

>chr11\_48600024\_48600224

ACTGTAATTCTGCTTGCTTATCATCAAAGTACATTTGGCCACTGGTAAAATTACTATTATATAA  
TTAAATCATTAATTTATAAGGCATACAATTTTATTGTGTGCTCCAAAACGTTTTCTGAATTAC  
AGGTATCTTATCCCTTTTTTTTCTGGAGTATGTCTGTAAATCTTTTCAAGTTGACAAAGATCTGC

ATGAT

>chr11\_79586352\_79586552

aggaatattagtgaggagtaataactttgaaaggaatctctttttctgaacagtagatctcaacag  
tgggctcaaactattcagcaaaccatgctgtaaaacagatgtgctgtcattcagactttgttgct  
gtatttatagagcacaggcagaatagagttagcaaaaattcttacaggttcttgatttctggaac  
ggtaa

>chr11\_79731552\_79731752

TAGGCTGATCAGCTTAATTGTTATTTTCCTCTGCTTGAATTTCTGTGATTTAACTTAATCTTCCAT  
CCTTGCCCTTCAAACCTATGTGCTCTTGATTTAATCAGCAGGATCAAACTATTGCACTTCCCTT  
TGCCCCTGAGCCACTAACAGAAAAATGATTGACAGTTAATCATGTCTGAAGAGGATCTCTTTCTC  
CCTT

>chr11\_81715752\_81715952

TGTGGTACAAGGGAAACATTTCTGGGAAGGAAGTCAATATTTCAAACCTGGTTTTTCATAAATATA  
GTCTGTGCCTGGGCTTTCTGATAAATCATGCTTTCTGCCACATTAGTCATGCACCTATTTATTGC  
ACGTAATGGTGGTGGTGAAGCTGAATTACTCTAAATGTGATAAAGATGATACTGGGGAGATGAT  
GGGGT

>chr11\_91723752\_91723952

CAAAAACCTTGGATTGGACTTCATGCCAAGAAACCACTACAAAAGAATCATGGACAGTGCATTAG  
AACTGCCTCAGAGAAGCCCAGTACCTAATATTgccattcttgagtcacccctttttattattt  
ttcacatgaaattcatcagcaaatctgctagctctgcataaaaagatatccacaatccagctac  
ttctc

>chr11\_91926752\_91926952

acattatttgaaagtaaaatatttaatatataacttaaataaattttattaaaagtaaaggcaaca  
agtatgcaagacacatcacttactaattttttattatattttgctatcatctatgttatgtctc  
ttaaactctgtagggcggaattttttttttttttctcagacggagtctggctctgtcatcaggc  
tggag

>chr11\_92252752\_92252952

ccacagactgggggggaagtttagcaaatcacttatctgataaagactccttatccagaatatataa  
agaactcttgaaattcaagaaaacaacccaaatttaaaaataggcaaacatttgaacacttaac  
ctacgataacttctttatcttagagaagatattcaggtgaaaaataagcacttttaagatgctt  
aacat

>chr11\_102503990\_102504190

gggggtgggggagaatagagagttgccatttaatgggaatataaagatcacatatgtgctgatgaa  
aCCTTAATTTTTATCGTCAGCTCAGATTTTGTTTTAAGATATATTCAAAGGTTTCTGCAATCTC  
CGCTTGAATCTCTCCCCACAGGGACTATGAAGTGGCCACCTACTATACTGTCTGCTTAGAGTAGC  
CACAC

>chr11\_103374590\_103374790

ctagaaaacttagaagaaatggataaattcctggacacatacacccctcctaaaactaaaccagga  
agaaatcaaaccctgaatagaccaataacaagttcttaaatgaataattaatagcctac  
caaccaaaaaaagtccaggaccacacagattcacagctgaattctaccagaggtacaaaaaggag  
ctggc

>chr11\_115705590\_115705790

ggctaagataaaaaagagtgacagcatcacatactgacaaagatgtagagaaactggatcatgta  
tacattgctgatgggaatgtaaaaggtagagtcactctggaaaataactgcatttcttttaaat

gaaaaatgaacttaatgtgtgacccaactattgcacacttaggcatttatcaca...aatatgattt  
tcaca

>chr11\_127299990\_127300190

TTTCCTATTTCTCAATAGCAGTTTGTCAAATATCACCTCTCCTGATACGTGTGCTACCTTCAAAG  
AGCTTTTCCTTTTCTTTCCCATTTTCATCTTCTAATGTTATACTTCTCATATACTGTAGGCAGAGA  
GGTTAGGTCATTAATCTTATTAAATGTGTTGGCCATAGTAATAGGTAAGGCAAATCAGTGAGAGA  
CTAAA

>chr11\_131078590\_131078790

TTCAGCATCCCCAGGTGCAAGGCTGTATTCTCAAACAGGCTGTGGGGAACAACATAGACAAGT  
ATACCCAAAGCAGAGTGCCGGAGAGAGGGATAGCAGATGACAAGTACCAAGGGCCAGTGCTGGGC  
AGAGATGTCTGCAGATGGCTGCAGAAATAGAAAAAATAAATATCGGGACAATCATTGACTCTAT  
GGAAG

>chr10\_2390200\_2390400

gagaagatgtttgcaaCATGCACTAGAAACAAAAAGCTGATTGCTAGGTAGTCAGCCATTTCTTA  
TCATATTCATCTGCTGTTTTCTTGTatgacactagtaaagtgcattggccaaagccaccttgccaa  
tggcttcagatagattcaggcaatagacagaacgagtgatgagtttggagagaagaggaagga  
ggaat

>chr10\_18347594\_18347794

cccagagaggtataacttttaaaaaatattccaagtctgggtgcagtggtcaccaccagacctg  
atcatgaggtcaggagttcgagaccagcctgaccaacgtggtgaaaccccgctctactaaaaat  
acaaaaattagccaagtgtggtggtggcgctgtagttccaactactcaggaggtgaggcagg  
agaat

>chr10\_35539594\_35539794

AGCCTCTTCTGACATTCTGCCATTTCCATGACCATTTGGTGAGAAGTACTGCACTTAGCTTTTT  
CACACTTCTCAAAGTAACAGGTTTATGTGTATTTCGTAAGGTTCTTTTTTCAGTAAATGAAAATACA  
TCTGGGAAGATTCAGGGCTTCGCATTCATGTTTACATCTAACACCTGATTGAGACAATTGCTGTG  
ATCTT

>chr10\_38903794\_38903994

ttcttcctgatacccctgaaacttgcacagtacatgctataaaatgcagattcaatgaGGGATCT  
TTGCAATACAATTTTGGAGAAAGAAATCATGAACCAGGATTTAGCGTCTCTTCCCATCAAACCCAG  
GCCATAGAGCAATTGCCTTTACCTGTGATGCACACCTCCTACCTGTCCTCCCCGCAGCCCGGCA  
TCTCT

>chr10\_59026394\_59026594

tttgaatagcataaaaagaaagtTgcatgttctcactaatacgtgggagctaaaaaaaaattgat  
ctcatggaagtagagaTCAATTTGGTTAGAACTGATGTCTCGTTGGTGTCTCTTATGTGATCTCA  
TGTGATCAACATTTTGTAGCTCTACACCAATGaatagaatgatggttaccagatggtgggaacggt  
agtgg

>chr10\_67406394\_67406594

gcatgatttctagtcttttaaattttttaagtttctccaaaaatagtatgtcttggttaatggt  
aaatgtataacttgagaagaatgtgtattttattgcacagtgggtgtgtactataaatgtcAGTGAA  
CAAAAAACAATAAATTTGTAAAAATCACTTTTAGACGTATCtttttttttttttttttttttttt  
agaca

>chr10\_68469794\_68469994

AAGGCCaattgtagcgacatagaatggtgaaactgaaagggttcttagaagccatctggcaaca

ctctcataaacagatgtgagaattgagatccagaaacatgaaaagatgtggttagggcaacagca  
gtcactggcaaatccagtgtggaagatgggtgtcttcacacattccacttctttttctgcAGGCAT  
CTCAA

>chr10\_68483994\_68484194

CCCTATTCATGCTTTTTAATCAATTGATACTTGTCTCCTTCTCACATTGATTAAATACCAGGA  
AGTCTCACAAGATAGTGAGATGTGAAGTCCCATTGCAGTTAACAAATGGTCTAAGACCCTTA  
GAAAACACATGGTTGTGCATCTTTATGCCACAGGGAATACGCCATTAATCTGAACTAATAAAGA  
GGAAC

>chr10\_85793820\_85794020

ttctttttatgcttctgattcacttgaatctgtgtattaagtcatttcaatcaattctggaata  
tatcacatattatgtcttcaaatatcacttctgctgattttctctgcttttgggggattctga  
tctctatctcctccatgtcccttactctttcttctgaattttctatcttattttttcttctatgt  
tatat

>chr10\_89758420\_89758620

aaaactgcaggtcaatatccctgatgaacttcaatgcaaaaatattcaataaagtactggcagac  
tgaatctagcagctcatcaaaaggcttatccactacaatccagttggcttcatacccagatgcaa  
ggctggttcaatatataaaaatcaataaatgtaattcatcacataaacagcactaaagacaaaa  
ccaca

>chr10\_108355610\_108355810

CTACTCCATGAAACAATCCTGTATCATTTTTGACAGGATATAACTCATACTGCTTTAAATTCCT  
ATACAGCTTTAGTTGCTAATAATAAACAGTAAAAATAAATATTAAAGctatgtttcagacact  
atcctaagtgcattacctgaattaatcttcacacaatcccactggcagagatgctattacctct  
ctgag

>chr10\_133213610\_133213810

TTTTTTTTGAAACCTTTAAAAAATTGTTTTGTTTTGCTGCTGAGAGCAATAAATTGTTTGGAAAG  
TATTAATGCAAATATGCAGACTCACCATATTTTTGCTGTGtgagttctaateccctgctcttacac  
atggataactgagggggagccagtaacttattttcttggagtctcagtttctttttcaataaat  
aggag

>chr17\_12380475\_12380675

GGAAGGAACCACCATTATATATGTTGGCATCTATTTGAACAGACTGTTTCCTTGTTTTcatacac  
acacacacacacgcacacacTtatatgtatatgcatatgaatatgtaAAACATAATCATATAT  
ACCATTTCAGTGATCTTTTTTTAACATTTGACACTAGATAAATTTTTATGTAAATAAATCTTGATC  
AGTAT

>chr17\_12735675\_12735875

gtgccagctgatccactgagtgaggggtctgaaaaataccttaaacaccaatcttaggttttata  
atactagtattatctgtaggagcaactggggagagtagtgatcctgtggcctcttagcttcatga  
ctcctgagccataacttctaacttctggctaattttgtagttttacaaaggcagctctggctcct  
aggca

>chr17\_49391001\_49391201

tatatgatcaagttgtctataattaaagggaaaatataatggcctttctagagattgggtttgat  
attaaaaaaaaaactcttatacactaaaaaattgggttagaacaataaatttttttttttttttt  
tgagacagagtctcactcttttgccaggctggagtgtagtggcacaatcttggctcactgaaac  
ctccg

>chr17\_69483405\_69483605

agatagccaatctcatttaaatctttaaggaagtaataagaatcattaatcttattataaatctgga  
tttggcatagatgtatctttaaataatctatgtgataaaatgggaggcacttataaagtactctg  
actacctaagagaggggaaaaatacagctttacaattctctgagttgtcagcttaactactcact  
tttta

>chr16\_31846099\_31846299

atatcaaatgacaacgtaacattacaccccaaagaactaaaaaaaaattagcagaaggaaatg  
acaagatcaaacagaaacaaaccaaatagagaatggaaaagctatagaaaaatgaacaaaact  
gggttggttttttaaaaaactaaaatcaacaaacacttaccaagactaataaagaaaaaatagaca  
agaca

>chr16\_51713699\_51713899

ccaagaggtcatttggtttgctcaaggtctcttcattcatgaaaaataagaccacaccacacata  
ttgtgttttgacttgatcttctcacatatgaataggtcttgggaatatttctaagctagaacata  
cctcactcagtatctttaaatagttgcaagttcttctgtagaatggatgaaacataatctgttcaa  
cttgt

>chr16\_60146699\_60146899

ATGTTCTAGCTTGGTTTGTAGCCCCACCAGGGGCAAGTGTGAGGTTAGTGAGAGTTCTAGACTTC  
ATGCAAAGCAATGTTGTCAGGTAGCCATTCCACATGATAGTCGTGTACAGTGATAAGGAGGGATA  
ttacacataaaagcaagacaacattcagctgttaaatttattcctgctgatttttgttcttctact  
acagc

>chr15\_36348108\_36348308

aagtatcttcaaaaattaacaaaagacattaagctaattccattaagcacaattccattaagcta  
aagattcaagaagagatataaccccgagaaggataaaatacataggaaaacattcctatcaatgt  
cttagtagaactagtgaaaagcaaaagacaagacttaaaagcagttaaagggggggttggggggaa  
gcaca

>chr15\_36385308\_36385508

atggatcttcttcaagctcctcaaatttgatagtctaaacaaaactggaaatcttcaaacatat  
ttctccctttcccttggtaagtcaatcatactagcactctcagtggttaaaggctagaaccatg  
tggtcatcagtgatggcttcccttccagtccttatttgggtcagtcacctagtgccgtcacttcta  
cctcc

>chr15\_36549508\_36549708

aagaactcctcagcaaatgtaaaagaagagaaattataacaaaactgtctctcagaccacagtgca  
atcaaaactagaactcaggattaagaatctcactcaaacctctcaactacatggaaactgaacaa  
cctgctcctgaatgactactgggtgcataatgaaatgaaggcagaataaagatgttctttgaaa  
ccaat

>chr15\_73498947\_73499147

ttgttttgtttttTAATTACTCATGTATTTTCTCATGTCCTTTACTCTATGGAATATCTCTGGT  
CTTGCTTATCTGCTCATTTGAAAACCTTTTTCTCTGCCAGATTTAGCTGTAGATTTTCTCTATT  
TTTTTGTTTTACCAAACCACTTTCTATCGTTTAAGAATTTCTCAACATTTTAATTTAAGAATG  
GCAtt

>chr15\_87303796\_87303996

GGACCTATGTAAAAACCAATGATCGATAACTTGGCCAGCCAGCTGCTGCCACAAGAGGTAAAGA  
AACTGTTGCCCTCCTGTTTTCCCTCTGCAAAAAGAAATAACTTGGTTCCCACCTAGATTTCTTTC  
CTTTGGCAGTGTGAAAGACAGCTCTTTCTTTTCTTCATTATCATAACTTCCTGACAGATAAGGAA  
AGTGA

>chr15\_91638396\_91638596

tctcaaccaagaacgctaaaagtaaatacaccagatagaaatgacttttagacccttatcagcctgg  
agacagcagcagaacatctacataacatgcttaactagcatttatctaccattagtttctctgtat  
atgtggcttctacaatttcctaaattgtaggagactcaaagtccttttcttttgtcttgtcact  
tctct

>chr15\_92777996\_92778196

ataattaagacaaattctgggaccttgctagagatttagatatctaaatacaagaagctcaaat  
aactcatgacagattcattgcaaaaaggtaatcaccaaggcatatagtcattggctatctaaact  
caaatgaaagaagaattcaaagagctgtgagacaaaagcatcgggtaacctataaaggaaaat  
gtatc

>chr14\_28828049\_28828249

TATTGATTGGTTCCTTTTTATATATTACAATAATATGTTAGGAAATAGATCTCCAACATTTTATA  
TTGCTGGGTAAATTGCAAGCTGCCACAAACAGAAAACCTTGTAATACAAATTTCAAGATTCTGCG  
AATATATTGTATTTAGGTAGATTTTAAAAACAAGGTTGCAGGGTTAGGCAGGATAAAAATGGGGT  
TCTAA

>chr14\_29722849\_29723049

atcattgatggctgggtgcggtggctcacacctgtaatcccagcactttgggaggctgaggagga  
cagattatgaggccaggggatcaagaccatcctggccaacatggtgaaacccatcactactaaa  
aatacaaaaaaattagctgggtgtggcagtgtgcacctctagtcccacctacttgagaggctgag  
gcagg

>chr14\_42794650\_42794850

TCAGTGCCCTAAGTTACCTTCTTCATTTATTCATtggttgccagataatacagaaaatgtaagc  
cccaattctggggcttacaaaagaaggctccttggttctccttgaaaagaattcaagggtagcc  
agtggagttacacagcaatcttttattgagtgatatttctccttgcaaagcaggactaactcata  
ggcag

>chr14\_42813450\_42813650

GATTGGGCTGAGCCCACTGATTCTTTCGTAATGCCATAAATTTTTCTTAACCAAGAAATGAACAG  
CAAGTGATAATTCTAATTAGTTGATTGGTAGCTCACTACTGAAAGCACAGGTTTTTTGACTCAA  
GTCTTCATTCCTATCTAGATATGTAAAGCTGTCACATCTTAAGATATTGATTGGTGAGCATGTAA  
TTAGC

>chr14\_44800650\_44800850

ggtaattataaaagagagagttttaattaactcacagttctgcatggctgcagagggctcagaa  
aacttagaatcatggcggaagggaaggggaagcaaggcacctcaacacaaggcagcaggaagg  
agaatgaatgcagaaggaactaccaaacttataaaacctcagatctcatgagaactcactca  
ctatc

>chr14\_54382050\_54382250

ttcattcctaaatgccggttatgacactgCCTCTCTCTGCAAATAAAAAAGATACTGCAAAGTTAA  
TCTAAATAACTTTCTCTCTTACAATCATCACACTTGACAATTTATATTCATAAGCAATATTATCA  
CAGATATTTGGCACCAGATGTAGAACCCTAGAAATATTTTGACCACGAGGACTTTGAGTGAGCA  
ATGCC

>chr14\_79547247\_79547447

CAGAAGGAAATATAATTATATAATCCGGTGGTTTTATCTTCTTATCCCTCCCCCATTAACTTTTT  
TTTGTFTTGGTTTTGGTTTTGAATCTCTGCTTCCCTTCTCCATCCCCTAAGCAAAAAGCataacca  
gcacgttttttagcatttagtagatacaagcctagcattgtgctaagtatcttgcgtctattatc

tcaact  
>chr14\_82013447\_82013647  
tcaagtcagcttcatccctgggatgcaaggctggttcaatatatgcaaatacaataaacataatcc  
atcacataaacagaaccaatgacaaaatccacatgattatctcaatagatgcagaaaaggccttc  
gataaaattcaacacttcttcatgctgaaaactctaaataaactaggtattgatggaatataata  
agagg  
>chr14\_83822447\_83822647  
TGATTCTTGCAATTAGAGAAGGGGTTTTGTTTTTTATTACTGTTCCCAGAACAGAACTCCCTATTT  
TGTGACACCGACCACAATGGAAATCCTTGCTCTTATTTTTGGAGGGGCTTTTGTGAAACTTGGC  
AGGGGAATAGGCTGCAACAAAGATGCGCTTCTCTGTGTGTCAGTGGCAGTTTCACTTCTGCATC  
TTCAC  
>chr14\_85144247\_85144447  
TTGAATGGTATGGCTCTAATAAGTCATTGAGAAAATTATTATTGATGCTCATCATTTTATAGAGC  
TGGGTTAGCTAGACAATGTAAAAGTTCATTGGCTCTCCATACCTGGAGGACACTAGAATGAAAAC  
ATGCTGATTCAAGGTTGCAATCAATTCAGAAGGAATTTTCACTATTTATACTGGGTCATGAAGAG  
TATAC  
>chr14\_94135047\_94135247  
gggcataatggcacgcacctgtagtcccattgcttgggaggctgaggtgggagaattgcttagcc  
ccaggaggtagaggttgcagtgaccgtgactgtaccactgcactacagcctgggtgacagagtg  
agactctgtgtccttcacaaaaaaaaaaaaaaaaaattatcctctagtcctagctatttgcggggc  
tgagg  
>chr14\_94337847\_94338047  
ctcatcttaactaattacatctacaagaaatctattcccaaacaaggttacattctggtactagg  
gggtaggacttatgaattttggaggggacacaatttaaccataaAAGAAGGGGATTTGGGGAAA  
CATTGCTCTTAGCTTTAAATGGGTGTAGTGGTGACAAGATGACAACGGACAACCCCAGAGCTGGC  
AGGGA  
>chr19\_20928160\_20928360  
tctcaaactcctgacctcaggtgatccgcctgcttcaacttcccaaagtgctgaaattacaggaa  
ggagccaccacacctggcAAAGAGCTGTAATTGCTGTTGGTAAGTTGTAAGTGGAGCGAATTTTT  
CAAAATATTGCTATTTTTTTTTTCCAAGTGCAACAGCTCATTTCACTTTATTTAGCTATGAATAATT  
GCGAT  
>chr19\_31208960\_31209160  
CACGTTCACCAAACCTGGAGGTATGTTTCCATAGGGAAGGAGAAAAATTCATGGTGTAAATACAAT  
ATTAAAAATGTCACCCAGCTGAGCATTCCATGTAGAAGCTTGTGTAGAGTTTTAATCTCTTCACC  
TGTTGGTGCTAAGAGAAAAGAGAGAGTTGGGGTGGGGGAGGAGACCGGGAGGGAGAGGAAGGGC  
TTATG  
>chr18\_10650400\_10650600  
tcaaactgcaaggtggcagtgaggttgggggaggggagctctgccattgctgaggcttgagtgggt  
aaataaagctgctgggaagtttgaccgggtggagcccaccgcagctcaaggaggcctgcctgcc  
tctgtagactccacctctagggacagggcatagctgaacaaaaggcagcagaaacttaaacatcc  
ctgtc  
>chr18\_31134202\_31134402  
cctctaactcattgattCAAGTTATTGAGTGTACTGGCTTCATGGAATATACTGTTTTAAATGgt  
agaatccttgtaacactttgtaaagatatcagaagtaacattgaaaaccttttgtaaccacacagc

agtttgaagatccaatagtgaaagtacttttaaaaagtcattgagcttaaagatgagttatatgctt  
ctttt

>chr18\_37413802\_37414002

atccagcatcttgggtgtgggtgtggaaagtatgggtatgacatCTTAGTATCTATAGTTTTAAAGTA  
ATTCTTGGTACATTAAcactgataagaatattgaacagagatgaccaagtgtaaagttctatgct  
tcaacaaaatgatatctttccagggttgacaataacaattttaataacttatatTTTTgttcaacc  
atTTT

>chr18\_53520002\_53520202

TTTTCCCCattccacaggctggatattggacacagtgatgccccattttggggatgcagatgaggg  
caaagtctccaggatggccaaacaacaagagagaaggagcctggggcctggactccatgtagccc  
cacagcagACGAGAGTCCTGATGACTTCCCAGAGGAGAGCCACCTCCTAGCAGGCATGAGAGAGT  
GATAA

>chr18\_61412420\_61412620

TGAAAAAGAAGTTTTTGTTCAGGAAAGGCTTTGTAGAGGGTTAGGACTTTAGCTAGTTTTGATGC  
ATGAGGAGGATTAGGAGGTCAAACATAGCAGGACATCATTAGGACAGGGGATGATGGTGTGAGG  
GCGTCAGACCCCAAATGGAGGATCTTAGGGAAGGAGAAAAAGGGCTCAGAGAGATATGGGCTTAT  
CATAC

>chr18\_62211220\_62211420

GAGTTTTCACaatttttttttttttaattttGAAAACAGGTATCTTCTGGAACACTTTCAAC  
tttatccttctgtacctggcttatctaacttaacatgtcttccaggtttcttcatgttgtaacag  
atagaaagatttcttttcatgattacataacattttattgtatgtatctgtcatgttttcttta  
tcctt

>chr18\_63617620\_63617820

TAAATATTTTTTCTGTTGATATTCTTTGGTTTTTTTTTTCATAATTCTACAAATACATTAATCAT  
CTATCACTTTAGGTAAATAACATTCTTGTAGCCCTGTTAAATCTTCATGATTTCTATTTTCCATT  
GCAATCTGTTTTGGATTATTTTTGTTAATGTTTGCTTATGCTTAATTGCTGAACCACATATGTAT  
AAGGC

>chr18\_70095620\_70095820

ctccagtggttcagaagaaaaTCTTGTTTTGTTTTACTAGAAATTTACTTTTTCTCTGAGTTTTTT  
TGCTATGACAAAACACTCAAAAATAATTTAAAAATGGAATAGTTATTCTGAATGGCTAATACGCAAT  
GACATATAGAGAACAGACATTTTCATCCCTCACTCTTCCAAGGTCTGATGTAAAAAAGTTATAAA  
AAGGT

>chr18\_70811620\_70811820

cccatcagatatatagtttacaatatcagatagcttctccattccacagtggttatgTTTTcaa  
tttgttgattgcttccctttgctatgtggaaactTTTTtagattgacacaattccacttgTTTTatt  
tttgttttcggttgctgtgcttttagtgtcatatacaaaaatttattgccaagaccagtatcaag  
gagct

>chr20\_6125400\_6125600

tttgtcaatttttgctttgttacaatagcttttgggtgacttcatcatgaaatctttgccattcc  
tatgtcctgaatggtattacctaggtcatcttccagagtttttatacttttgggttttacattta  
agtctttaatgcatcttgacttaatttttgtatatgttgtaaggaaggtgtccagtttcagTTTT  
ctgca

>chr20\_6398600\_6398800

tattgagtaacttgaaatgtggctagtgcattaaagactaaaatttttaattttacatttaaatag



ccacatgtggctagttgctacccatattggacCCCAGAGCGCTAGACTATAAGCTTTGCGAACCTA  
GGGACCACATGGGCCATCATCGCGTGCCTAAATAATAGTAGGCAATCAAGGGATATTCGCTATAT  
TTagg

>chr20\_22852600\_22852800

ctttttgatgtgctgctggattcggtttgccagatattttattgaggattttcgcatcgatggtca  
tcagggatattggtctaaaattctctttttttggtgtgtctcggccaggctttcatatcaggatg  
atgctggcctcataaaatgagttagagaggattccctctttttctattgattgaaatattttcag  
aagga

>chr20\_54016393\_54016593

tattctaagtcagccatcataaaaatgcttcgacaagccattacaaatatacttgggacaaatga  
aaaaatagaatgcctgagctcagaaacagaaactctcagcaaacacatagctccattgaattca  
acagtagaatgtgtgggactaatgaagaaactggaagcctggaaggagaacaataaaattacac  
aatct

>chr21\_24869329\_24869529

AATCTTTGCCACTAGAGACTTCAAATCTCTTCAGGCTTAAGTTGGAAATAAAATTCAAATAGCAA  
TCAAAACAAAACAAATTACTATTTCAAATAAAATAAATGATATTTAGTAAAAGCAATTCAAATA  
TAACAAATAAATTTTATCACAGCTTTTTTTTTTTCAATTTTAGCCTGTAAATCAAGGCTTTTGAC  
TAATT

>chr21\_40886130\_40886330

TTTGGCTTCCAAAACAAACCCATCTCATAACTCATAGATTATCCATGCATTTTATTTGAAAAGA  
CGATTTTAGACAGAACAAGGCAATGAATGGAACATGAAAGAATTCTCATTTCCCATAGTTGAAG  
TTGGAGTCAGAATCTATTATTATTATtattattattattattttttttgagacagggctctca  
ctctg

>chr7\_14269275\_14269475

GGGGAGAAAATTACTGGGGTTAATCTTTAGGGATATTGTTTTTTCAACAATTACAAAATACACTT  
ATGATCAATGACCATCCTTCATTCCTAAGAAATCTGTCTCTAAGCATAAAGTTGTTAAATAAAAT  
ATTTTGTTAAGTGTAACAGGATAAATTATGATATATTCCGTCCATGCCAAGATAACCAAATAGTT  
TTAAC

>chr7\_18223275\_18223475

tttcatttttctgtagagatgggggtctcgctatggtgcctaggctgatctcaaaatcttggcct  
caagagatcctcctgctttggcctcccaaagtgttggtgattacagacatggggccatcacacctgg  
ccATTTTAAACAGTTTGTAACACTAAGGTATTAAAGTAACAATACATAAATGGTAAAGTATCCTGG  
GCTGT

>chr7\_35180275\_35180475

aaggaaactcagagaagttccaaaaatgttctgggcaatggcagtgctcactgcaatgagtactta  
acatcctcaagtgacttaggagaaaagaagtcatttttgtcataaaatgggatatgattaaagta  
agtcttattactttatgatcaTTTTTAAATATTTACTTGGGCACTGTCTTAAAAAGAAAAACTTC  
CTACT

>chr7\_35497075\_35497275

tcctcacatttcaaaaccaatcatgccttcctaacagtcccccaattcttaactcagttcagca  
ttaactcaaatgcccataatccaaagtctcatctgagacaaggcaactcccttccacctatgaac  
ctgtaaaatcaaaagcaagttagttacttcctagatacaatgggggtacaagcattgggtaaata  
tagct

>chr7\_39064675\_39064875

aatggtaccagttcctccttgtagctctggtagaatggctgtgaatccatctggtcctggact  
gtttttggttggaagctattgattattgctgcaatcagatcctgttattggtctattcagag  
attcaacttctcctggttagtctgggagagtgtatgtgctcaggaatttatccatttcttct  
agatt

>chr7\_40456875\_40457075

acattttaaaaatgtttacttggtccattcagtttttcttttttagtaatgatttttcagggca  
tacatttttctataagcaagactttatctatatcctaagtttggggtatgaagtagtctctttt  
ttattgtcttgtaaactccttagtaatagcagttttcttttattttcagacctaaggattattag  
gaaaa

>chr7\_51634306\_51634506

GTCAAGGTAGGTGGCAGGAATGGGCCCTGCAGAGAAGGGCGTCCCTGTGCGTTCTGGCCTTGAA  
GAGAGCAGATGCCACTCAACCAGGAGTCTCGCCAGCAGGGAGAGAGAAGGTGGATTTGAACGCAA  
GGCCTCCAGTCAGTGGGGGAAGGGTAGATGTTGGATGCCACCCCATAGGGCAGCTCATTTCTCC  
CTCTT

>chr7\_68365864\_68366064

tctgtctactaaaaactataaaaattagctgggcatggtgtaatcatgtctgtaatcccagtt  
cctggggaggctgaggcaggagaatcacttgaactggggaggcagagcttgacagtgagccaagat  
cacatcactgcactcaagtgaaaccctgtctcaacaaaaagaaaacaaaaaaTCCTCATTTCTAG  
GTTAT

>chr7\_71634464\_71634664

cagctgattatTTTTTTTTTTTTTcagatacagaatcttctatggtgccaggtggtcctga  
actcctagcctcaggtgattTTTTTgcctcagcctctcaaagtgctgaggttacaggcttgagcc  
accacgcAGCCTTGCTTCTTGCTTATACCCTCATTTCTCCCTCTAAGGCTTTAATTTTTTTGTTA  
ttttc

>chr7\_84751664\_84751864

CTTATAGAAATGAATCAGAACTGGGGAATAAAATTAAGGACTGGCTTTGCTCAGATGTAGAAATA  
AATGCACCACAAGAATTTAACTATTTTGTATTTTAACATTTTTTCCTTGACTAAAGTTGTTTTT  
GTGTTTTGTTAAGCAAATATCTGAAGAACCAACTTTTGTGCGAACTTGAATTATTTGATCAGAC  
GAGAC

>chr7\_89121864\_89122064

CATCATAATTACATTTGTTCTGTTCAATTAGGGTTGGGTACTAGACAGAAAATATTTTGTA  
GAAATACCCACCTTCTTTGAAGCACTGTTATACATAAATTTCTTTCCAAAAGTATTTTTTAA  
ACAGAGAAAATACAAAATTGTAAGTGATTCATTTTTTATTATTATAAAAAGACACACTTAGGCCA  
GTAGT

>chr7\_113183964\_113184164

ATCTTTTCTAGTCTTCTTGCCAAAACCTCAAAGCTCGTTAAATCAAActggtccccttcacag  
tagcacttctagacagagtagtgcatattgactatttccaattgcttaccttctaactctgattg  
aaccattccaatctggctttatTTTTTcattactctacaaaaataatccttatcaaggctcactggt  
gatct

>chr7\_118034764\_118034964

ggcctgcaaggtcttggggatTTTatagggcacaggataggggcacagcagggccagagggtct  
tgggaaatacaacatttgggcaggaaaacaaaacccttgtcctcacctaggtccatgggcacag  
gccccgggtgtggagccctagccagggaccacgcctcctctactccacacttccctttctcct  
tctgt

>chr7\_123006364\_123006564

AAATTTTCTTTTAATATCTCCGAACAAttttttttttacacagggctcttgctctgtcacctag  
gctgtagtagaatgggggtggtccttggtcattgcagcctcaacctcctgtgctcaagcaatcctc  
ccacctcagtctcccagtagctgggaccacaggtgcacgccagcatgcccagctaatttttgta  
ttttt

>chr7\_142808678\_142808878

ctttgcaaaaattacaacaattagaagattatggcagtgagggatgtaatctggccaaattcc  
ttcttgcccttggtcctcaagttgaccttaattattcctgagcttaggctaagctaacttcggaa  
gacatttagtttatagcttaaatgataatagcccttccctaaaactcaaccactgttgtaaagct  
aatga

>chr7\_144974467\_144974667

ggttttaaaaggtagtttccctgcacaggctcttttctctgtcaccttgtagacatgtctttc  
accttctgccatgattgtggggcctcccagccacgtagaactgtaagtccattcaacctctttc  
ttttgtaaatttcccagctctgggtatgtctttatcagcaatgtgaaaattgactaatacagcag  
tgtat

>chr6\_9464214\_9464414

CCTTTTAATACACGGAATAGGAAAAAGGATGCTAAACGGAGAATCATGAGACTTAGATCTCCTTC  
TGATCTCATAGCTCAGAAAATAACTTGACTGTAGCACAGTCTTTATGAATCTTAGTTATTTTCATA  
ATTAATACGAGAAATAAGATTAATGGGTGATTCCCAAACCTGTGGTATATCAGATTTTTTCAGTAA  
AACTT

>chr6\_9981614\_9981814

AAGCATCCAATTCCTTTCGAATAGACATCATCCTTTTGCCCTTTAGTAGGCAGATCACTGTGTTTG  
CAAGCAACAGGTGCAGGGTGAAGCTTGTGATTTATTTGAGGTATGTTTCTCAAAAGTTACATTTTC  
ATTTTAATTTCTGCCATGTAGGAATTCATCAAGGAACCCCTAAGCAGCACAAACAGATTACATGAT  
CTACT

>chr6\_33439422\_33439622

aaccatttcttcacacacacacaaaaattgcaagggaaaaaagagatggattggaacctatagt  
ttaaagagtttaaaagaGGCCTGGCcatcgcttcttgcccttttggttaagatcaagtgtaAAAG  
AGgcctggcacagtggtcactccttgaatcccaacactttaggaggataagcaagaggatgact  
tgagc

>chr6\_55189841\_55190041

TTTTACTAACTCATTGAAATtcagtacttctgtgctatctttgtcactaatagaagttacaga  
tatttttatataacattttattagtggaagttctttcaaattaggatctgtgataatcactacac  
tgaaacaacaatatttttagactcacttagatcttgatatttcttctgcaatgaggaagcatat  
gtatt

>chr6\_58678241\_58678441

CTGCTGTCTCTAGTTGATCAGGATCAGGATAGGAACATTCAGATTCAGTTTATTAAGCTGAAAA  
ATGCTGTCACACTTCTTCCACTTAATCTGGCTGTGTAAGCATTTTCCAAAAAGAAATAAAGTTAG  
TATTCAGAGATACGATCACTCTAGACACAGATCTGGTAAGAAGAtcaagataggtgtgtttta  
tccag

>chr6\_86743081\_86743281

caacaacaacaacaaaaagaaaatttcaggtctatatacctgaggaacatcaatgcaaaaatcct  
caataaaatactggcaaacggaatgcaacagtatatcaaaaagcttatccaccacgatcaagtca  
gcttcatccctaggatgcaaagttggttcaacatacacaatcaataaacgtaatccatcacata

aacag  
>chr6\_89125681\_89125881  
ataccacgggttgcaagctcatccctcagacctgcgtaaggactcctagagctattcctgtttct  
tctgtgacatataaagaaaagtcttgccccgttggcaagcttacaactgggggttgggttagggc  
cttcttttagggcctggaaagccacttctgtttcaggtgtccatcttactatatgggtattggctt  
tctga  
>chr6\_93085679\_93085879  
GCCCAGCATATCTTAATCAAAAACCCCTTATTTGGGAAAAAATACCATTGGCTAACCAGCTTCA  
AATGCTGCAATATTTGACTAAAGAGCTTCAGAAACCATAAGAATCTATTTTAAAATATATCAAAA  
AATTATACCCCTGGAATAAGTAACATTCCTTAATTCAACATGATGATGTTGACATTTTGTATCT  
CATAA  
>chr6\_101933287\_101933487  
ACCTTCCAAGCATAAATATTTTTCTTTATAGGAACCTTGTTCACTTTTAAGAACTACTAAATCA  
CTAAGTACAAAACATATTTGTGACAATTTGGGGAACCTTGTGATATTTATATAAAAATATGTTGA  
TAAGCTTGTATGTTAGTCATTTGTTTAAGTCATTAATTCTGAAAAGTAACTCTTACAGAATTTAG  
AAAAG  
>chr6\_102368307\_102368507  
TAATCGTATGTCAGTGGCTCAAATTGGGTTGAATAACAAGAGCAGATGAGAAGTACAGTTTTAGC  
TGGGCATCAATGTTACTACTAAAACCCAAGGAGGAAAAACAAATACTGAGCGATAGTCATCAGTCT  
CTATTATAGATATCCTCCATGAAGAGAGAATGAGGAAAAGTTACTGAATGGTAGTACTGGGTAGTA  
TTGAA  
>chr6\_113411107\_113411307  
TTGTATTTATAAGTAAAATGACATACAAGTTCACCATTGTGTGTGTGTGTGTATATGTGTACATG  
CTCTCTCTcacacatgcacactgtataaatgtatatacacacatgcacacacacatacataAAAC  
TCAACATGATATGAATAAAAAGTGAAGTTTTATTCCAAATTTTGTGATGTTTGTGCATGCTT  
TTTTA  
>chr6\_142234507\_142234707  
CCTATGAAGTTAATATGTTTCCCTTGATTAAACCCTTTTCTCACGATTGAATCTGTAACActtaac  
acttgggtgaagcccaggccttctcctccatagaggaagaatggaaatcagatgggaagtctt  
actctttcgacctctaaacctcaatgtatctgcacccaatttctcctgcatttttaattgttaciaa  
aacac  
>chr6\_148369707\_148369907  
catggttgattaagaaaaatgacaaagaaatgaagcattataaaattgagaatgaaaaggaaatta  
tatcaaacatgtaaaatTTTTAAAATAAATAATGAGTATATTAAGACTTTTGCATCAATACATA  
gaaaagtaagcaaagcagacaatacaccatacccctccaccaataatttaccaaatttgaatca  
aggag  
>chr6\_153749107\_153749307  
actggttgctgcagattatgggtcaatgtcctgtttttatataatgggtctagccattgtccattca  
catatccagtttatcaTCCATGTATTCTAGTTAGTGGGACAAAGCACCATTTGATGGCCATCGC  
TCAAAAATAGGAAAATGCACCTTTGAGAATAGAGCAAAAACCTTTGGAAAGTGTTCATCCCCAGGCCA  
ACATC  
>chr6\_156142508\_156142708  
GTTCTAGTAATAAGAGTATCCCCAAGGTTTTCTTTTTCTTTTGTATTGTAAGCCAATTACTCA  
CGATTCTGACACTAGGGAAGAAGAGACTAGTACGATaggggcgtatgtgtagaagcggaagat

atttgtttgtggttgcgccaggggtggctgagctaagtcacaagaaagtgaattcagctcagctaa  
ggaag

>chr6\_165102210\_165102410

ATTTTCCATTTGAGAGGGAAATTAATAATGAATGTGTTTTGTTCTCGTTGCTTGGGTTTTGTTT  
TGCTATGTTGATTTTAAGGAGGTTGATTATTTCTTAATAAATGGTGTGAAATTTTGGAGACTGCC  
ACCTGGTGAGTTGAGAGCCCTGGTTTCATGACTAACTGGCTAGATTTTCCAAACATTTATGTAAC  
CGAGA

>chr5\_7219000\_7219200

TGAACTGGCCACATCCTTCATATAGAAAATTGAATAATTTAATAAGGAATGGTCTAACTCAGATT  
CTAGTTCATCTGTTTTATTTGCCTGGTAATTACAGCATAACAACCTCAAATTGGACTGCCAGCTGA  
GTGTTTGCCTGGGGCCAGAGATTTCCCTTGTGCACATACTGGTGTCCCTTACACCAAGTAGAGAC  
TGATA

>chr5\_18229843\_18230043

gggagggatagcattaggagatatacgtaatgttaaataatgatgagttaatgggtgcagcacaccaa  
catggcacatgtgtacatatgtaacaaacctgcacattgtgcacatgtaccctaaaacttaaagt  
ataataataataaaaTTTAAAAAAAAGATCTGAACTTTCAGTAGCATTCAACACATATAACTACT  
CCCCCT

>chr5\_18445243\_18445443

AACAAATTTAAATTCATTTGGGGTTCATTTTATTAGACATTATGTTCTTAGAAACATGGATAT  
ATATTACTAATCTAAATGGCTTATAATTAATTTGAAGTTACCAACATCATCAAAAATAATTATTT  
CTTCTTATACATCTTGATCTTCTCATTATGCAAATCTGGTCTATCAATTATTATGTACACCCTTC  
GGATA

>chr5\_29313043\_29313243

TGTACGTAGGTTCCAGGTAATTTCTGGTCCCAAAGCACTGAAATAGGCAGCCTAACTTCTGAGACC  
AAACATATGTTTTTTTTTTTTGTTTATAATTAACAAAGTCACCTGTTAAAACAAAAAGAATAAA  
AATTACAGTATCTCACTGAAAAGCAAACCTATGATGGTAAGGTAACACATTAAGAACTTTAAGATG  
TTTAG

>chr5\_51792843\_51793043

CCTCCCAAACCTTCTCTATCCCCAAAGCTGCTAGCTAAATCAGTGATGGTAGCAACTCTTCTGTT  
ATCTGGCATTTCATGGGATCCCACCTCATACTTAATCTCAATGTGGAACCATCTGTACACATCTTC  
TGCGCACAGCATTGACCAAATGGTTCCAAAACCTCATTAAGAACTATTCAAAGAAAAATAAATT  
ACATT

>chr5\_57906043\_57906243

tgtgtgtacatacgttttttatttctcttgggcaaatacctaggagtggtgattggttaggtcatatg  
gtaaatacaatttaacttcatgagaaactgctaaactgtttgtcagagaggctgtgccatttttaa  
acagtctcagcagcaatttatgagcattccagttgctccacatccttgccagcaattggtgtcag  
gtttt

>chr5\_63267244\_63267444

aatgatcagtgatggtgagcttttttttataagtttggttggtacataaatctcttcttttgag  
aagtgtctgttcatatcctttgcccacattttgatggggtgtttttttcttgtaaatttggtta  
agctccttgtagattctggatattagacctttgtcagatgggtatattgcaaaatttttctccca  
ttccg

>chr5\_97134044\_97134244

ttcattataccctggtgactgacagtgatcctgcaaataaggattaactatgtgctttcatg

tggaactcctctttgcagcatgtttgctaaatgggttcttctaccttcaagttcactctacttat  
atTTTTgcaaatgaaatgTTGGTgattttgtatttCattatgtactacggctcactcaagtaaat  
ctgcc

>chr5\_99218901\_99219101

aaataacaataaaaaaaaaattagTatatttTatgtcccaaatttgcAtgcAtgcatttTatgctaa  
aaaagTgatttCattgtttatccaaaattcacaTtaaactgagtttCattgcattttTataTacca  
aatttgGcaaccctacATAGAAATACATAGTAAAAATAAAAAACAAAACCTccctgtggtcagaa  
aagta

>chr5\_103882501\_103882701

tgaaatctgttTgtaaaacgtgtgtttgaaCaatatgaaatcagTgcAtcctgaaaaagaacagaa  
tagcagcgttttttggGgaacaaggaagataaccataaggtcttactgctgcAtggttggGga  
gtatagagccacagttttcttctTgcagaaagccagTacgagaaatttCactgaattcttttccc  
aaca

>chr5\_117744701\_117744901

AACAACATGGCTTACCAATAAAGCATCAGCAGAAAAGACAGGAAAAGATTGAGGTTTCAGAAAGTC  
AAGGTGAAGTTAACGCCAGCAGCAAATGCAGAAGTTCTGTGCAACTTCGTAGCGCAGCTGAGAC  
TGTTTTGCCCTTCAGTATTCTGGCTTTTCTGAGTGGAGTTTACTAATTTGTTTTGCTTTGTTT  
TCTCC

>chr5\_122003901\_122004101

TATGCACCAGTTTTTCTTATCAAAACGTATCAGCGCTTGTACAGGAATACAAGAAGAACTGAG  
GAGAATAATCACAGCCTAAGGGAAACAGCATGGTAGTCTTGTAGCTACTTCCAGCATAAGGACCT  
TGCTGGGCATTATCTGCCAGGCTGTGGTGCGGGAAACCATTATACAGCATGGAAAAGTGAACCTG  
GCAAA

>chr5\_125293901\_125294101

CTGATAATGAGTGAGGAGCGTAAAATTGTAAATCACTAATTGTATGACGTGTCCAATTATGCTAT  
GTTAGACAACATAGCCTGGAATGAAATATAATGGAACAGAAAGAGAATTTTCAACCAAAATATAA  
TGTGGCTTTACAGTTAATGAATATCTTGTATGATACACTTTATTGGACAGCAGAGACAAGCATT  
TCTTG

>chr5\_144161407\_144161607

AGAGCCATTTTACACTTAAGCTATTAATATATAGTGCATTCTTTTGCCCATCCTTTGTTATGGA  
GGCCTGCTATGAGTATTTTTCAGGTTGCTAAGGTATGTGGGCTCAGGAGCAAGCCAACGACGTTGT  
CACAGGAAAAACAAAGCATGGAGGGCAGCATAGTTCCATGATGTGGTTCTCATGGTGGCTTTCTT  
CTCCA

>chr5\_151530807\_151531007

TAGGGATGTATTAACATTACTCCCAATGTCAGGGAGAGGTGAAGGAACAGACTGGCTATGCATCA  
CTCAGAGTCCTGAGGCTGTGCTTCTGGCACAGTTTGACTCAGCGATCTCCCGTGAGATCAGACTG  
GCTGGGCTGCCGTAACATCACACATttataggatcttaggttgaaaacactgtaggggtcatc  
tagac

>chr5\_155328822\_155329022

aaaccttttacttcttaaccttattacttacctgtagctgatggtttctccccacttcatagat  
caagaacagaaatgacagatggtaatggttttagtgggactctacccaaagtACAGATTTCTCATT  
CATAACTATTCATAGATTTCTGGAACCTTACCCTGCTTCACTGTTTGTTCATGAGTTGATATTTT  
AAAAA

>chr5\_155363622\_155363822

atgggcggccatgggcaggcccagaaaaagcaccacaagttcccactctggtccacggaactggc  
agtccggccccaggttttaggcctgtccagcttgaaggtggggcttcactagggacgcgcccc  
cttttaccaggagcctgtctgcctcttaccactgttccgtacagcccaggctgttcatgcccag  
ggca

>chr5\_165102222\_165102422

tttttagtacctgttttatttttgttgttgttgttgggtatatacttaacagtgtaactacta  
ggtaatatggtaatcctctgtttaactttttgagaaaaacaccgaactgttttccacggtggctga  
agcattttattttcccactgggaacgtatgaaggttctggttccatataccttgccaacactt  
at

>chr4\_18319502\_18319702

CTTTGACTACTGAACCTTTCAAATTTGTTGGGCACCAGGAATACAAAACAAATAGGATCAGCCTT  
CTGATTTGGAGGGGGAAATAGACTATAGACAAATAATGGAGCCCCATGTAAGGGGTCTGCAGTA  
AGTTGCTTATAGAAGGTAGTTGTATACAGAAGGTAGAAAAAAGGGAAAGGTACCTCTGGCTATT  
CCTCC

>chr4\_22789502\_22789702

catttccaccaacagtgtacgagcgttcccttttccccacagcctcaccaacttctgttatttta  
tgacttttactaatagccattatgactgggtgtgagagggatatttcattgtggttttgatttgca  
tttctctgatgattagtgacttggtttggctgtgtccctacccaaatctcagcttgaattgtagt  
tcca

>chr4\_29179702\_29179902

CACTATCAAGACCAAGGTGTAAATTTGTATAGGGCACTCAATCCCAAAGTTAAAAAGCCACCTAAA  
AGATAATACTTTGATTTGCCTATGTAATTAGGCACGACATGTTCCACTTAGTACCTATAATCTAG  
GACTGCCTTGGGAACACTTTTCTTTATATATGCCTTCTATTTCCCTTCTGTATTATGGAAAGATA  
AATGG

>chr4\_30546102\_30546302

AGAGCAATAACTCTGGTTACTGTTCCCTCTGGACATTTATTCAATCCATCAGTCTAAAAGCCAAGA  
TTCAATTTAGTAGTTTGTATCTATCACTAACTAAAATATTAATTTCCCTTTAAAATATTAATGACT  
TGGAAACTATTGGTCTTGTGTGTTATAAGAGGAAGACCCAAGGGAAGTGAAGTGAAGA  
CAAAA

>chr4\_46748443\_46748643

tctagaatcagggcattgacaaaagtggagcatggagtagcgtgtcaccagaggtaggcagaat  
ggatattgaatggggcggaacaaaagatgtccagtataCATTGAAAGTACAGTGGAAACagagg  
tttattcattgagagagaccagtggactagattttctaaagtttcttctcctctctatgattttgt  
ttcta

>chr4\_58465843\_58466043

TTTACACTTTATAATTTATAGCTTAATAAAAATAGTATATATCAGGTGGAATGTGAGAAATAAGGA  
AATTGATCTATTTTGAATTTGTAAAGAATGCTTCTTTGAAAACTAAACTCaatttaataaaaat  
attaataCATTAAGTTGAAGAAAACCTGGCTTAAAAATGGACAAGACAAAGTATTTTAAAAAGAA  
GATGT

>chr4\_59820753\_59820953

gatctcctgaattatttttcatcaaatttgggctaatacattggataatcataatttatttttca  
ttaaatttttatgtctcctttctctatcctctccttaggaatccaaccaccatgttttagacca  
actgaagttgtcctacagttcactgatactcttcgttttacatttgtttgtctctctgtatcatt  
caata

>chr4\_61457605\_61457805  
atctcacaccagttagaatggcaatcattaaaaagtcaggaaacaacaggtgctggagaggatgt  
ggagaaataggaacactttttacactgttgggtgggactgtaaactagttcaaccattgtggaagtc  
agtgtggcgattcctcagggatctagaactagaaataccatttgaccagccatcccattactgg  
gtata

>chr4\_67794005\_67794205  
AATTCACTTGACCTACAGACAGCCAGTCTCCTACCCATAACATTCAGGGGTAGACTAGCTGGCC  
TGGCATCTAGGGAGGTTTCATTTTCAAAAATTTAAAGCCAAGACGTCTATCAACATATTCAGCAA  
CGGCAGTAGGAGCATCTAGTCATTGATATAAACTGTCTAGGATAAGTCTGCTAGGGTAATATGAT  
TGCTG

>chr4\_68063405\_68063605  
GAATTTGCACAACACATTAAGTTTGGTAATTAATAGAATCATGTATGGTAATTTGGGCTGTTAAG  
AGATTTCTGTTTGGTTGTGGATAGTCAAACACTTGGATTTAAAGATTTTCATAAGCTTCCATATG  
TAGCTTCTAAAACAAAAGCTGATTATATATTTAGTACCTACTACTGTATATTTCACTGTTTTCTAC  
TCATA

>chr4\_72538136\_72538336  
agtggagatctgaagaaagggagaagggagacatgtgaatgaacatgggaagaagggccaacca  
aaagaaactgcaagggcaagactcgggagaagcatggaggccaggttgctacagtgcaggtag  
tgaaggggagagaaattcagatacacggttgggtatctgcataaatgcaaggaaatgaagtcagac  
aatg

>chr4\_73847336\_73847536  
ATTGAATTCTCTACTGTCTCTCACTCAATAGCGAATAGATTTCTATCATCTATTTACAGATATTG  
ACAAAATAATTAGACCAAAAAATCAAATTTCCCAATCACTGTTGCCACTAGAAAAAGGAATAAATTA  
TTGGCCCTGCTCAAATCAAAAACCAAAAACAGAggcccgggcgagtggtcacgcctgtaatccca  
gcaact

>chr4\_112398551\_112398751  
tattatttgaaactataactaacctatthttcagcccttcctacctctcgtcaccatctctcctcat  
tttccaggtttgattactttaattaaggaaatgattaaaaagattatcattattaaatthttatt  
tttgattatctatthttctatthtttaaatatataatthtttaaaatthtgc aaatatthttaagaataaa  
tttag

>chr4\_119133352\_119133552  
ttaattgthttttataaataaaGCAGATAGAGGCAGCTACAGTCTGGATTAAAAGTAGAGAAAagg  
ccaggcctcatgcctgtaatcccatcacttagtgggggcaaggtgggcagagagcttgagcagcc  
cagaagtttgagaccagcctgagcaacatggcgaaacccatttctacaaaaaatacaataatt  
agcca

>chr4\_122204350\_122204550  
ccaggcaggccctccagatccaggthttcaggccaggatctgtggtcccaggcttctggtctaccc  
caaagccaggcagggcccagtagggcccaggcccaggaagcccctgcagcctcatgthtttaggt  
ccacttaaggcttaagacctagcccagtgccaggccaggtcccagagccccaggcttcaggacc  
acctc

>chr4\_136804950\_136805150  
ATTTTAAGAGTACTATCAGTAAGATAAAGAATCTTATTAATTAGAATAACAAAATGCGTAAGGT  
CAAGCAATCAGAGACACCATGTTTTGTTGGAATGCAGCAAAGCAGAGGGAGTGCACCATAAACTA  
AGAAATCAGAATTCTAAAGCTAGGATTTTACCAGGATTTGTTTTGTTATGTTAAACAAATGAAGC



AAACT

&gt;chr4\_153144750\_153144950

acagcaacctcatcaaaaggggcccagtcactgagcttgatgataagggagccccgtctgctttaa  
cccacacaaggagagtaacctgaagtgacctgatgttaaccaatctgctttttgcagtaggctat  
ctccccgttctctgctcaagttgccttacagaaacctcttctgcctcaccagtgagctcca  
gtctg

&gt;chr4\_160002750\_160002950

gatcacatgagcctaggaggtggaggttgagtgagccatgtttgctctgcactccactgcactc  
cagcctgggtgacagagtgagactctgtctccaaaaagagagagagagaaaaaacaaaaagaaa  
atgtgattttaaagctgtattttattctattgctttaacataatttatttaataagcccttctt  
gttga

&gt;chr4\_164230350\_164230550

TCTCTATGATTTTTTCTGTCAAGTAATTGTAATTCTACCTTGTTTTCGAGGTTTGGTTCAGGTGT  
TTTCAAGAAGCTTCCTTCAGTCCTGTCTGAGCTAAGAACCCTCTGAGAATGCTGTGAATATACATT  
TAGGGTTATGTTACCATATGCTACATGCGAAATGATATATTTCTgtatattttccccactgaat  
ttagt

&gt;chr4\_173442425\_173442625

TTGCAAAATAGCCTTTTCAGCACTTGACTGACAGAAAAATTCTTCTGACAGTTGGTATAAAACATTT  
TACCACAAACAGAACCTTTGGCATCTCTAGCACATTGCAGACATCTGTTACAATATGCCATAATTT  
TTAGCACCTCATATAAAGGCAATCCAGAACTATGATCTAAATATAACTAGCATATTTTATATG  
GGCTT

&gt;chr4\_173475225\_173475425

GATTCTTGCCCTTGGCCTTGTTCGAATTGCCATTGCCTTCAACAAGAGGATTTATCATTTCCCAAT  
TCTAACTCCCACCCCAACTGTATATTCTAACTGACCCATGGATTCTTTCAATATTGGAACTATG  
TAAGATTAAGTTTACCTCTTTGATATATTTCTCATTAAAGCATTGCATGCATTTCTCACATTCT  
CATGA

&gt;chr4\_176416806\_176417006

CCAAGCAATGGCTAGTGCCCAAGTGGGGCTCAAGTACGGGACAGATTTACTGTTATATTGGAAA  
GGCCCTCCGTTTTACCATGCAAGCTATTCTGTCTGTTATTGAGCTAGTTGATGAGCAGTTTGAAGG  
CTGTCTCTGCAGGCCTTTTCAGTTGGATGTCCCTGGCTGCCTTGAGCAGAGTTTCCGTTAATGTCT  
CCAAG

&gt;chr4\_180496006\_180496206

gaaaaccttactatcagtaggttcccagtagaaaacctatgcatgccaggagtcagtgggatgac  
aaattcaatcagctgaaaggagaaaaaaaagacaaaaacagcaaccaagaatactataacctggca  
aagttgtctttaaaaaatgaagatgagattaaaaaaactttccaaaataaatgaaagctggggaa  
gttca

&gt;chr4\_182302206\_182302406

AAAGTTTCTTACCTCTGCTCCAATATGGTATGAACTATTGTACACAAGAGCCTATCTGAGAATAA  
TAGCCTCAACCAGACTTGGAATCCATATATCTCATTGCAAACTAGATTGATTTACTAATTGGCTG  
CCAGTAGTGGGCGGATGTTATTCAttccttcggatgtcctgacaaatcaccaaaagtctgctggc  
ttaa

&gt;chr3\_892200\_892400

aactagatggggtttctaaaggttgccccatggttgagggccttggtgcaactgccaatgga  
cggatccagttatcagataaaaaaatagccatgccacaactgctaggagccacagtcgtactggc

tgttcttgaggccccacatgctgtggtgactttaatgaatacacaaggacatcattggctaaca  
atgct

>chr3\_1869400\_1869600

AAAGATTATTTTGTCCCAAAAGTCAAAGCTTGAATTTTGTCAATAATCCTTTATGTATTAATTAC  
ACACGAAGTTCTAAGAAACATAATCTTGCTTTAAGAGATGTGGCTTGTCAATTTAGCCCAATTCC  
AGTGTAGCAAATATTATATAGAGATTTTTTTTAAAAGAAACAATGAGCATATCCATTTTGAAGTA  
TG TAG

>chr3\_5717200\_5717400

TCGCTATAGCATCTGGTACATAGCAGGTTGCTTAAGACATCCTGGCAGGTTCCCAGAAATCTTGG  
TGGTTACATAGAAGGAGGCTTCCAGTACCAATCCCTCCCTACACTTCAGACTCCttttttttttt  
ttttttttttttgagagaggggtcttgctctgtcaccacagactggagtgcagtgggcacaatcttgg  
ctcac

>chr3\_6181000\_6181200

CTTGCCCCAAAGCATAACAATTCCTTTTCTTTAAAAAATTACATGACTCATTCTTATAGGAAAA  
GAAAGAGATAGTTCTATAAAAAATTAAAATGTCAGAAAGGAACAATTTAAACTCGTTTTATGgata  
gtcagtgtaatatagaagaatgagcactagttttgccgtctcacagacctgggtctaaatacaag  
cttag

>chr3\_16748996\_16749196

TGCCAGGGAGATGGGACAGGGAGGGGCCGATAAGGTAGAACCAATGGGGTTGACTAATCAGACAG  
CTCACAGATTAGTTTTGTGGCctcctctgtgtgctagggcatttgtctgggctctgaggacagtgta  
gtgaaagagatgaacacagATAATTACTACTAGTAAGCATGCACACTACTGCCAGGTAAAAGGA  
ATGCA

>chr3\_16766796\_16766996

caaaattacatatgaaggatgccactgatgcactgtttttaataaagaaaaaatggaaacaacc  
ccagtgtgcattcatagagaagcagtaataattgtaaatcatatagtataatacgaatagca  
atgtaaCTACTGACACAGAATGTGGCCTTGATATAAAATTAAGGGAAAACAACAAGTTGTAAAGCA  
GTGTT

>chr3\_19320996\_19321196

TTGAAATGAGATTGCCATGGC ATAGATATTGGGGCAGATGAATGAAATGGGATGCCATAGGGCTA  
AAAAAAAAAAAAAAAAATAAGGAGGAAATCATGACTCTAAAATCTATTGGGAGAATACAGAGGAACGA  
GCATATTTTATATTCCATGTGTAAC TTATGAGAGCAGCACATC ATACATCATCCAACCATTCTTT  
TAAAC

>chr3\_20254196\_20254396

gataacttttttttttttttggatatttttagtagagacaaggtttcgctacgttggccagctggt  
cttgaactcttgcccttatgtgatccaaccaccttggcatcctagagtgtgggattacagatgt  
gagccactgtgctgcagccACCAATATCTTTCTTTAAAGCCTGTAAAAccctgagcattggcgaag  
taaat

>chr3\_22090196\_22090396

tcaagattgctttaactattctgggtcttttgtgattccaagtgaattttaggattgtttttcc  
atttaagtggaaaatgtcattggaattttgatagtgattgcatggaattagtagatcactttgga  
tagtacggacaataataattattaattctttcaattcatgaacatggaatatcttttcatttgtc  
tgtat

>chr3\_29022796\_29022996

ATATTCTGTCTGTTCTATCATATTTTAAAAATTTTGGTCTCAGTATAATTATGCCTACCCACATT

CTCATCCCTTAATTCCTTCTGTCATTTTCTGTATACAGTTATGTTTTTTTTTATCATTTTTATTT  
TTTCACTTGTCCCTCAGTCACTttttaatgagataatgcatgtgaaggtgcttagcacacataaata  
ttagc

>chr3\_84954110\_84954310

gcaggagctgggaacaggtggttagccccaccctcttacaagttggaggggtgggagccccgcct  
cacaggcacagctgcatccgcttagtcttggtgctgtggatctgtgtatccctgcactttgcgggga  
tgggaggtgcaggaagccccctgccccgcagcctcagaagtgcctgttctgctgcctggtct  
ctccc

>chr3\_86037510\_86037710

CAAGGAAGCAGATTTTTCTGAATACCTTCTGAAATATGTACATAACATTTATAACAGTTTTAGTAT  
CAGAAGCTTTTTAGCGAAGCTATGACAACACTGTTTCTTAAATAAAGAAATATATCTATTAAT  
GATTGAGAAAAACGACTAAGAAAAAGAATTTGCCCCAGTGAGTCCACAGGTTTAAACTATTGGAA  
AAAAC

>chr3\_88514310\_88514510

CTTTTCAATCTCATCTACACTTCAATTTTGAATAGTCTATAATATTTGAGAATTAACAGAAAT  
ATTGCAAGATAAAAGCTAGCAACTGTTATGTAAAAGTATCCATTTTCCATGGATTCCCGCTAAAA  
GACTAACAGTTACTAAATCATCCCCACAAGCCAAGCTTTTAAAAAGACCTCTACTACAACACA  
AGATG

>chr3\_102490910\_102491110

CTTTTCTGCTGTTTCATATGCACAGAGCAGATAAATCAGACTTTTAGGCTCCAAACTCCCTTGCCC  
CATTATGGACTCAGTTCTCGCGGAGTTTGTCTACATTCTGAGGGGTTGACCTAGAGAGTTCTT  
CACTATGATGAGAATTTCCCTCTTTTATTTCCATTCTAGGAAGGCTTGTTCACATTGCTATcc  
ttaga

>chr3\_114450910\_114451110

CTTTCAGTGGATCATGATACATTGTTTTATACTTTATTGCTTTAATAATCCATTCTAGACTGTTG  
CTCAGGACTAACAGCAAGTAGTTGCATCATATAAATTGCCTTTCTATACTTTCTGTAAATCAGA  
AGATTTCCACATCTCTAGTTATCTAACATTGTTTCTCTCTCCTCAAACATGGATGGTAGTAATT  
GACTA

>chr3\_117549710\_117549910

TTAAGGTCCTCAGTGGCAAAATCTGATGTTAGGAAAAATAATTTAAGAGCCCTTTGTTTTCTCCC  
TGGTCATTTTTACTGATATTTATCAATGGAATATTCACATTCATAGCACATCATGGGTCAACTTC  
ATATGGAAAAACGAACCTTTCATGAATAGGACATATGCTCAAACTATTTCCCTAGCCCTGTACT  
AGAAG

>chr3\_117806910\_117807110

TCTGCAGCTGAGAGTCTATTGTTTGAATGACAATGTTATACGAATGAAGTAATAACCTCAATTAT  
GTGAAAGTTATATTTCTGCTATAACATGGAAAAGCTGCATTTTATCTTTCATATTTAGTCCTAAA  
ATACCAACAACCTCCCTTGAAAGCTTCTTTTTTCTAGAATGAGCTAGATTTAATCTAGATAAGTAT  
ATGTG

>chr3\_147318910\_147319110

GAAGCTTATTTATTAATATCTGCATGAAGAAATTTGGTAGCAATATAGAGAATAGCAAAAATAAA  
TTTCACAAAGACAAACTATTTCAACAAATGATTTCTGATCATTAATATATCATAATTTAAACAAT  
TAGAAGTTTGTCTTAATATTTTGTGACATCTCAAAGACATAGTTAAAAATAGAGAGGCACAAAAT  
TATTA

>chr3\_164188106\_164188306

caacctaaaaatcatgaaaaccaatatacagttggtatnttaagttgcacaggttttttttgctt  
gctacgcagcaacagataaatgGAAAAGAGAACAGTAAGACACAGGGTACTTATCTAAGGTACA  
GTAGTGAAAGTGACAAAATCTAGAGGCTTGGTCAAATCAGGTAGAAAGGACGTTGATATAAGGAA  
TCTTG

>chr3\_173043506\_173043706

AAATTATTATACATtagatggtattatnttttctttctgcagaaaagaaaacaaaaggctcagag  
aggtaagtatctctaagtctaaggttgcacagctggtaagtagagtagctaggatntttgtcct  
gtctatatcttctcaaaccatagctttATAATTCTGTAAACCAAATATAGAGCTGCATTTTCT  
TCATT

>chr3\_179768106\_179768306

actggctcatttccattagcctaaaaacgtgtaatatctcccacctcaaaaataacaacatacttc  
catgccttctcgatattccccatctaccaagccttttctctggtcctttatagctaaactccttg  
aaacttgactatttcagctgtctttactttccctcctcaatnttctctgatgtcaaacttattcag  
gtctt

>chr2\_4263525\_4263725

ACTGTCTCCAACGTATGATATGGGAAGGAACTTTATTTTGGAGATAGTTTTAGTTTACAGGT  
ATCTATTTCTAGGAGGtttttttgtttttgtttttgtttttgagatgggatccttgctctgccac  
tcaggctggagtgacagtgccacaatctcagctcactgaaacctctccagggtcaagtgattct  
catgc

>chr2\_5263949\_5264149

ATCAGAGCTTGCTGATTCATATCTCTTCAGTCTGGCTCCATGCACTTATTTTCTCACCAACCTG  
GCCAATGTTACAACTAATAATTCAACATTGATGTTTCAGATAAAATCTTGCAGGTCTGGATATTG  
GTGTGAAGTTCAATTTCTTAACGATAATTACAGTAAAGGTGTTCTAGAAATGAATCTGTTTAATA  
CAATT

>chr2\_6849349\_6849549

aagcaacctacatgtcttccaactgacaaatggataaaacaaaatggggcatatccttgtgaaggg  
ttattgctttgcccttaaaagaatgaagtagacagatgcttcaatatgaatgaaccttcaaaa  
catcatgctaagtgaagaagtcagtcaaaaagaccacatntttatgatnttttatgaaatg  
tctag

>chr2\_15217549\_15217749

acaaatttcttggaaatgaatcctctgtgtcagtcatttgctgggcactgagaatagagtgacaa  
atgagacaccatgctttccatcgaagagattattgttcagttgggaacacagaaaagcaagcaag  
taaATGCAGCCTATTGTGTTTCATGTAATATAGGGAGATGTGAACTACTGATGTAATAATGAAGC  
ATGGG

>chr2\_76599292\_76599492

tgtaagttcttttgtagttcagtgagttccgagttcttggtcccacaactgagaggaatgagata  
tgcagacatcagagagtgggtaaggcagagtagaactgattgagtgacagaaaagctcctggcag  
taagaggggacccgaaagtgggttgccggcaatgaggttgagtcagggggcttttatgggcttgg  
catga

>chr2\_78157492\_78157692

ctgagacaaatgaaaacaaaaacacagcatgcaaaaacttctagaatnttagcaaaagcaatgttc  
agagaaaaaattacagttataattatctcatttaataaaaaaacctcaaattaagaacctaa  
cttaacacatcaaggaactagaaaaagaaaagcaaatnttaaatataacagaaggaaggaa  
aaagg

>chr2\_81797889\_81798089

GGATGTAAATAAAGTATCAGCTTTAAAACACTTATAGCAAAATAACTGCAAGGTGAAGCATTAAAG  
CCCTTTAATTACAGTACCACACGAAGTTACTTTTCTATTTCATACTATATTCCCAGCATTCAAAGA  
CTGATGTAATTAACAAAGATAAAGTTTTGTAAATAGGTCCAGCTGAGGACCCAGAGAGAGAGAAA  
GGGGT

>chr2\_84375689\_84375889

CTGCAGCTTCTCCAGCTGATTAAAATTCATTATTTATTTTGTACATCTGGATGGTAAATGGAAG  
CATCCCTAGCATTGGTTTCTCCAAGCTGTCTCCAAACAGGTTCAATAAGAGGATTAGGAGTTTAA  
ATAGGTTTCCAAGTGTAAAAGTAGTTTTTCTCATTTTTTCATGTTGACATTCTCAAAACCAATTTG  
TCTTC

>chr2\_107381568\_107381768

ACTGCCTAGAAAACTTTAATAACCAAGAACTGGCATAAAAATCTGCCTTTACAAATCTCCATTTT  
TGGTACAGAGTGACAGGAAAATGAGCCCCAGCATTCAACCAATCCCCTTTGTGTATTAATAATCC  
TCAAACACGGCTGTGAAAAATATGAAGCATGCCCAATTGTGGTGCACCTAGCTGCGTGTGATTG  
GTTTG

>chr2\_108167968\_108168168

TGGCTAGAGCACTCCGGAGTGAAAGGTGGGATATGTTGGCTGACTTTCACTAAACAGTTTATAC  
CAATAGCGCTGGGATGTGTTCATCCTCCTCTGATATCCCTTGGAGAAAGGTGGATATCCAAACTCG  
TCTGGCATTCTGTTAGGGAGGAGGCGATGGGGAGTGGAGAAGCAACTGATGGTGTCCATTCATTT  
GCGAA

>chr2\_114844130\_114844330

aTTTATCCATGACTAAAAAAGTTGATAATGATATTTTAGGTCGTATATGGTGATCAGTTTGAAT  
GTACAGGCTATTTGGCCATCCCCAATCATACTACATGGATTACTACATCGTGCCACTTCCAGCTA  
AAAAATGTAACTACTTTGGAGGCCATGTTGATATCCTGGGATGTTAAAGAAACAGAGAGAGAAG  
CAGTT

>chr2\_123981130\_123981330

tgaagctattggtgatctaccaatctgcaatctagagcatgatggccctctttttacagctcc  
actaggcagttccccagtggtgaactctagtgggggactgactccacatatcccttctgcaactgc  
tctaacagtggttctccttgaagtctccacccttgcaagcataattctgcctggacatccaggaat  
tttca

>chr2\_125497330\_125497530

caagtctctgagcctctgctcaaatgccatcatttgcataaaactgttcccacgaccctggtga  
gaagtcatatcttcttactctgggcttttctagaatcttattaactgctctctttggcactgatc  
tcaactctgacttccattactcttagctgtgtgcgggacctccttctataaatggtatgagctct  
tttag

>chr2\_126208930\_126209130

acaatgatgcaggcaatttacaactctgccttagccttcaacttcttgcttacacagatactcaag  
atcaagtggaggtgaaagtttccatcttttctcttttttggatgtacacacaacctgacat  
gtgaatgatcttctagattacaaggatattgtcagagattttcctaggttccatggacatctcat  
ttcct

>chr2\_139732530\_139732730

tgctcattggaataaaaagtaaatcctttctggaggaaaataacatcaccgagttccttaatt  
acttgatattgttcccagactttgtgtattcaatctaaaatactcaggtacataaaaagggtgaa  
gttaacaaacaaaagaatacaacgaaggatccagatattagaactatcaatcacatcctttaa

ataag  
>chr2\_140284330\_140284530  
TGAACATGTAAATGAAAAGCAAAGAAAGAAGCAAAGGCAGCTAAACAATGACTATAGGCTTGAG  
AGCTTAGATTCAGAGAGGAATAAGGAGGAAAAATAAAATATCTGTCAGAGTTCAAGGGCTTCAAT  
ACAAGGGCCAGTAAGACAGATTCTGAAGTCATGAGGCTTTCATTGGCTTCCAAAGCTACAGCTT  
ATGTT  
>chr2\_141370130\_141370330  
GTTTAAAGCTTGGTATGCATCCTCTCTCATCTCCTACCTTTTTATTTGTCAGCATTTCATTATGG  
TGGAATTTAATCTTTGTTTGAAACTCAGTGATTGAGCGCTTGATCCGTCTTTAATCACACAATTA  
ATTACCATGCTCAGACTATGATAGCTGGCCTACCAAACAATGAACAACAAAGTCAACAATTTTAA  
TACTG  
>chr2\_164975754\_164975954  
AAAGCTCTGCAATTTGCTGTCTACTTTTTCTGCCACTCACTTCCTAAATTAACAAAAATCTTTCT  
CCCTCTAATATCAATTAGTTATTAGATTAAATATTAGGCCCTCTCATACCAATTTTATACTGTAG  
TCTAAATTACAATCTCTAAGCAGTTTCCTTCCAAAGCCTTTTCCTTAACGCCTTGGCTCACTACT  
TCCTT  
>chr2\_178957754\_178957954  
TGACCCACATATGTGAACAAAAGATTAATCTTGACTCAGTAGGGAGGCTATTTTAACTGAGACT  
TATAGATTCTGACCTATAAGAAATTTCCAAAATGTGTCTCCACTCCTTGGCTTCTCTGTAGAAAT  
CCATACTGTAGAAACAGTCGCATACTGTTTAGGGTCTTCTATGGTAAACCAATGAACTACCACCA  
AAGAC  
>chr2\_180766555\_180766755  
ggagataagtatctcatggtgggagcaggagcaagtgcaggggtgggggacatgctatgcactt  
ttaaacaatcagttgttttttctagtatattattatttttttaagttctgggaaacgtg  
tgtagaacgtgcaggtttgttacataggtatacatgtgccatggtggtttcctgcacctatcaac  
ccatc  
>chr2\_202428155\_202428355  
cctcccggacggggcggtgcccggggcggggggctgacccccacctccctcccggacggggcgg  
ctggccgggcagaggggctcctcacttcccagtagggcgccgggcagagggcaccctcacctc  
ctggacggggAATAATTCTTATAAAAATCAGTCAACTCCTTTATTTTCTACCATCTTTTGTATAC  
CTTTG  
>chr2\_211282355\_211282555  
acatthttctttattcattcatctgttgatgaacactctggttgettccatatcttggtattgtg  
aatagtgtgcaataaatatcagagtgtagatatttgacatgctggtttctatthtttggggaata  
tacacctagcagtggtgattgctggatcatatgaaaattctatthtttacatthtttgaggaaccccc  
aaatt  
>chr2\_211378555\_211378755  
aatctttaatccatcttcagtggtttttgtgtatggtgaaaggtaggagtccagtgtcatttht  
ctgcatatggctagtcagatatcccaggacaatttattgaaataggaagttctthttcccattgctt  
gtthttgttgagttgtcaaagatcagatggctgtacgtggcactgtthttctgggctctctattct  
gttht  
>chr2\_229364756\_229364956  
ggcacttcttgtagtgcatatthtcaggaaaagtttcttagtgttatthttatctgaaaatattat  
atthttacctgtattatataaaaaataaaaaataaaaatagttthttgtthtttctgggtatagaatgc



agaaaaatttagagctgtaatcacttatattatcaaagaagaatatttttaataaataacataa  
tctttcgttttgagaaactataaaaagatgagaaaaactaaacccaaaattagcagaaagaataa  
caaag

>chr1\_164866176\_164866376

caaagcgagactctgttaaaaaaaaaaaaaaaaaagaaaaaaaaGACAATCAGCTGCTTTCATTCTCC  
AAAATAAGTGTAGAAAGATAATAAGAAACGTTTCACTGAACTATAACTTTGTCTTTGACCACGG  
AACAGAGGTGGGTGGAAGCAATTGGGGAAAGAAGCCAATCAGCAACCTCCAGAAATTCCTCTT  
TTTTT

>chr1\_176431177\_176431377

ACAGGGTAGCCACTAAGCTGCAATATAAATGACAAATTATTTATGTCTTATTTATTAATGTAAAA  
ATGCCAGAAATTCCTCCTAGAGTCTGTTTCATCCACCTCATCCTTCCTGTATACCTCCCTACC  
TCCATTAGTCTGGCTGTAATTGAGAAATACTTACACCTAGCCTCAACCATAGCAATgtagaaga  
gcat

>chr1\_190265177\_190265377

tgtttgtttgcttttgtgggttttttttttgggggggggctgggcttttgggtgttatatttaaaa  
atttttgccaaaaccagttttaaggatcttttcccctataattttattcttgaagttttacagttt  
catgttatatttaagtctttaatATTCCTAGGATGTACCCACAAACATTA AAAATTA AAAAAAA  
CAtg

>chr1\_192378977\_192379177

cgtctaggtatcatcctttacctctattgcatctgctactgatgtctctgatctgcatgacatc  
cagctgacaggtccACATTCAATATACCTCTTCTTCTATGGTGAGACCTCTTCTAGATCACTGG  
TCTTCACATCTGCTTTCCCATTTTCATTGTAAATACACTAACTTTTAAAATCCCTTCATCAACAT  
GCTTG

>chr1\_193931177\_193931377

TTTTTCATGAGGATTTGAAAAAGCAATCTAGATGGCTCTGAAGCTATATTCCTACCCATTTTGCTG  
AGTGAGCCAAGAATGGGTTCAACTTGACGAGGTAGCTCAACAAAACCTAGGCCAATTTAGCTAT  
TGGTTTCCCTGGCTGGCTCTACCTTGTGAACAATGCCATTTCTTATTGCTACTTTGTAGTATGAA  
AGTTC

>chr1\_197382777\_197382977

TGTTGTGATCATAACATTCAGTGTGACTTAAAAAGGGGAGGCACCATGTGTTAAGCAGGGAT  
AGGATCTAAGAATAACAAATCTGCCTGGTAAGCAGCACAAATGAGTCTTACACTAAGCCACACTG  
ATCCAGCTTGAGGGAAATGAGTCAAACCAAGTCCCCATACTCTCTACCTGCGAGAAAGAGGTG  
ACATT

>chr1\_216173177\_216173377

attttacagataagaaaactgagtccagaagagataaaTATGAACAAGTATTA ACTCTTGATAAG  
AGAGACCTATTAGATTTTAGCTCAGCACAATAGTACACCTTATACCTCAGGTATCAGGAAATGGA  
CAAGAATCAGTAATACCAGAAATCATCAGAACATGCCTATATGTGAAACTTCCTTTCTGACATCA  
ACTGC

>chr1\_222926977\_222927177

ctgtaccagggtgatattatgtaaccaagagaatattggcagaattaatgatatgccactccagaga  
ttgttataaaagataactttggcttctgtcttgatctttctcactacttttctcttgatcattca  
ttctgaaggaagccatctgcatggtatgaggacactcagccagTGCAGCAGActgaatatgttc  
cccca

>chr1\_239328777\_239328977



gttatctgagaaacacagataaataaggcattggtcactggtcttaattagcttataatGGATATT  
ATAGAGTCAAATTATCTGTTTAAAATTATTATCTGGATCTCAGCTGTCTAGTTAAAGCAAAGCAA  
CCCCAAAGCTGAGACAATTTTAAATACAAAATCACATGTCTTAATTTGATAGGGAGCAGATAAAG  
GTTTA

>chr1\_241472577\_241472777

cgggaggctgaggcatgagaattgcttgaacccgggaggcagaggtagcagtgagcagagatcac  
accattgcactccagcctgggcaacaagagcgaaactccaactcaaaaaaaaaaaaaaaaaagga  
aaaagaaaaAGAAAATGACAAGAATAAACACATAAGGTGTCTATGAGAAACAGAAATCACCCAA  
TTGCC

>chr9\_1139200\_1139400

tccttcagctactttaaatataactatctcacttcctcctggcctgcaggatttctcctgagaaatc  
tgctggtagttgtattagaatttccttatatgtaaattgtgttattatgtccttgctgttgctggga  
ttttctttgtcttttaattttgatagtttgattattatgtgtctttgtgaactcctccttgggt  
tgatt

>chr9\_7637400\_7637600

TCTTCTTTTTCTCTACATTTTCGTGTTTGTCTTCTAAAGTAGTAGTCTCCAAATAGTGGATCAGCT  
AGACTGACTgcatccagacatctggaaaactggttaaaaatttagatggattccctaagccctgg  
ctatagagattctgattcagtaggtctaggatagggctctgggaaaacgtttcttaaaaaactttc  
cagc

>chr9\_7819200\_7819400

taaataattatgctcagtgaaataagtcagaaaagactacatggtatataattccattttcacia  
aattccagaaaatggaaaatatagagatggaaaacaggtcagtggttatctggggaaagagataa  
gggggtgatgagaaaggaagagattaaaagccctggaaaaagccttttggggatgataaattg  
tattt

>chr9\_9561800\_9562000

actggttgctaccttctctcatttggttggtccttctcctccaagctcttattggtggaatggcc  
catggctcagacttagacattttctctctatgtatacatgctgctttaaggatttttctctcatt  
ttatggctttaaattgtcatctctgtgccaccaacattcacttttttaattcttctggactgacatt  
tcttc

>chr9\_10646000\_10646200

ATTATGTGGATCTAGCTCTAGCAGTGaaactacttgacttttagatccaatttcaatttcttggtt  
tctaaaataaaagtaattaatattcatttttcaaagaataattagaggattgaattagacaatgt  
acaatatatgctcagcaAATGTAAACCTATAGTTTGTATTCATACATAATAACAAATGTTCTTAA  
AATTT

>chr9\_10906400\_10906600

tattcatcctattcttaaaattctcaactatggtttcaatttatagtttatagttcaatttat  
agttaagattcaagctttctagcttgaacacaaaaggtgcttcatgatgagatcccagctctact  
tttctgttctcatctcacacctctcctctgacacttttttatgctccaggcgtaatgcactac  
ttgtc

>chr9\_11210400\_11210600

AAATAACTCTATGTTTCATATCAACAAAAGATTATAATTTTACAAGTACAATAATATTCAGTAGTT  
TTCATGAGTTAGATAGTTGAAGTTCAGTATTATAAATTGGCTTGAAAACTTTTGCCACTGCTGAT  
CATGCTTAAAACATAATGACCAAATGTAAGTTGAATCCTAACTATGAATTTCACTAATAGATTTT  
AGTGC

>chr9\_23183200\_23183400  
ataaCATGAGCTGATgccaggttaagggtgtgtgcacctgtagtcccagctactcagaaggcttag  
gcgagaggattgcttgagcccaagagttcaagaccagcttaggcaacatagtgagaccctgtGCC  
AAAACAataataataatgtactgagcccaatatatcagtcacattaacaaatataaataggc  
ttaga

>chr9\_24732200\_24732400  
CTTTCTTAAGCTCACCTTGCCCTACCCCTTATTTCCACTGTCAGCTAACCACAAATCTTTTTCA  
AATCAACATCTCAGCTCTCACCAAATTAATTATTTAGGTTTCAGATAAAAATTTTATTTACCCAT  
TTTTGTTCAATTCATTCTTCAGGTGTTTTTAATCTCTCAGTGTAACATTTCTAAACACAGTAAA  
GCCCA

>chr9\_41650800\_41651000  
AAATGTGGCCAAGGAGTCAGATATGTCAATTCTGCGTGAATTAATCTGTTTGTGCAAATGATACT  
TATCATTACCTATGATCAGCACTTTTAGCTTTATCATATCATAATTTACCCAATATGTATAGGTG  
TCAACATGTGTGAAGATAGGCACCAGATAAGCAAGACTCATTAAAGATGTTGCCATAGATTAATCC  
TACAG

>chr9\_43547204\_43547404  
TCCTCAAAGACATGGCTAAATCTAAACTCTTAGGTGCCTGAAATTATTTACTAATAGAAGTAAT  
TAGAGAAGAAACCTGGTGCTTTGTTCCTACTACAGCGATAGCTGCTGGGAAGAGGGCACCTCTTGG  
ATGCATAGACATCAGGGAGCAGTGTCTGGAGCTGGGttctttttttctgagatggagtcttgctc  
tgttg

>chr9\_45129804\_45130004  
cacataaactacacatgcaaaactatacacacacataaaacccacacacaaagcacacacaTGT  
AAACTACACACAGAAATGATACACATTTAAACcacacacacaaactacacatacataaactacac  
acagaaactatacacacacataaaaccacacacacaaactacacatacataaactacacacaca  
taaat

>chr9\_66389180\_66389380  
acactctcagtttgaaaagcgatagacactcaataaccagcccagcccataagggcagccatgga  
ggctaaagcctgcaaagccacaggtgactgccctggtagaggttttccatgagcctctacctct  
gcagcaggctactcccCCTTCTACTACCCACCACCTCCGACCACCCTACAGCCAGCATACTGT  
TCCCC

>chr9\_72228580\_72228780  
aaggcctagaaaggcagttaccctccaacataatgtgatttctacatgggtctgaattgctccat  
gtaaccaggaaacttcccagatgatttctaataaccacataattcccctgctcaagatatagttt  
cttgtttacatttctctataatacgggtatacattcataatctttggacacacactcttcctgtgt  
ctgat

>chr9\_73678580\_73678780  
AAGATGGCTGAGGGGGCTGAGGGGAGGGTGGCTGTAGGGACTATTGCAAGATAAAGCTGGAAATG  
TAGACTGAGAACACCTGAGAATGCAGTATAAAAAGACTGGCATTCTCTTGCTGATAAAGAAACA  
CCGCCAAAGGTGTCTGTGGAGAAGTGGACCTTTTTTTTCCAGGTGACATTTCCAGAGTTAAGGTGT  
AAGAA

>chr9\_76831180\_76831380  
gtactgccttgataatthttggacaagatcccacagaattctctgggttaccaggcagagactctt  
gaattattcacttactttctcccaaacacagaatctctctctcagttctgaaactacctaagc  
taggagtggagtgaacaagcacctctgtggccaccacaactatgattgcattggatcagacctg

aagga  
>chr9\_78208380\_78208580  
GCTCAGATTCACCCTACTCCTTTTGCTTCACCCATTTTCTCATTGACATGGTTTTTTTTGACTGT  
CTGTCTGATGATCTAATCTTGCTATCCCTCTATCCTTATCCATGGAGTAGGCTACAGGGAGCCTG  
CGGTCTCCATTtgctatagtctgaatgtttgcctctcccccaattcatatggttgaacataatt  
cccag  
>chr9\_87121180\_87121380  
ttggggattacaattcaacatgagatttgtgtggggacatagatccaaacatatacacgctcaac  
cagcatgaaaacagcctggcagtgaggagaggccagtgctcctaggaccagctctcaaaggaagt  
ggacgcctgaaaataaatgctccagaagcccttctgctcagatgggctattctgggagctctcaga  
atcgg  
>chr9\_103440779\_103440979  
ttcctctctttctatattgggtgccttttatttggctcctcgtacctgattgctctggctaggactc  
ccagtactaagatgaataggaAGGCACACCACATTTTTGAAAGAGAAATTATATCAGATGAAACA  
CTTTCTAAAAGAACAGTAATTTAGAGGGGTTTTGTCCGGTAACATATTACAATGTGTTACAAATC  
AGAAT  
>chr9\_104483379\_104483579  
accxaaatctcaacttgaattgtatctgcctggattcccatgtgttgtgggagggaccagaggg  
aggtaattgaatcatgggggagcagttttccattctattctagtgatagtgaatgagtcttaca  
gatctgatgagtttatcaggggtttccgcttttgcctctctcctcattttctctttctgccaccat  
gtaag  
>chr9\_107244979\_107245179  
AGCTCACTCCGGCTCAGCATCCTAGGTGTCTAGGGCTTGCTTCCCCAGAGAAGTCAATACTGCA  
CAGGACCCAATGCCTAGTGTCTGATGAGAAGTCCCCAAGAGGGAGAGAGGACACAGGGGAACAAC  
CAGACTAGAATGATTTCTCTGTGTCATGTTCTCCAGTGCCACTACCTCTAACCCCTGATTCTCC  
TTCTC  
>chr9\_121132179\_121132379  
ccatataatataatgatctaccatttctatgaaatattcatagtaagtgaataaatagagacagaa  
agcaggtttgttattgacagaggctggagggagtagagaatggggaggtactgcttaatgagtgt  
ggggtagcttttCTTATTTATCAGAACctcctacttattagctatgtgaccttgataaatctgg  
tgaac  
>chr9\_122207179\_122207379  
AATAATTACAGCTGACTTATTTATCAACataataactaacacttaccaggtgtccattgtgtgtc  
agtttcaaagcttaacacgggttaatcttcacaactactctatgcagtgataactaatattatcc  
ccgtcttaccataaaggaagttgagatacagaaacattaaggtacttatccaaggtcatattgct  
gataa  
>chr8\_5329192\_5329392  
atcttgatacaagcattctgtaaataatgtactttgctcttagaaaaggtgttagtgacttctct  
gtagctatgtcatttgtatatcctggtaaggggttctgatgaggttacttttctgttttccgca  
cttcaaccaagtaaacgaatagaaaatatttcagggttactaacttttcttttcccaATATGGTA  
TAATG  
>chr8\_52596047\_52596247  
Tggggagaggggaatgggggaattagtaagaagcagacataaagtctcaattatgcaagaggggaag  
agatccagagatctgctgtacaacattgccctggaattagcaatgtgggtattctacacttaaaa

ttttgttcataagtaagatcCTGGACCAAAGAAGCTCCCCTAAGAGGTGGTTTTTTCTTGTCTTC  
TCCTC

>chr8\_53271847\_53272047

actgtgaatctactaaatgccactgaattttacactttaagctgttaacttttagattatgtgaa  
ctttacttcaattaaaaaaGGAGGAGGAAGAGGCCAAAGAAAGCGAACCTGCCATAaccacaatga  
acaagttgatgggtttcctgctctaataagggttaaatttgaatggcgtagacacataagaagc  
aaaga

>chr8\_85568845\_85569045

TCACCACCTCTTCCAGGTCCAACATTTTATTATCATACTGAAAAGTTAATACAAACATACCAAG  
TTACCCAAAATTGAGTGTAGATTTCTTGATAATTAGAGTAATTGTTAAAGTTAAAGCATTATCTA  
CCTGAGATAAATATACTTGaaatataataaaatgagaaaaatataattttaaGCATTGGGT  
TTAAG

>chr8\_93643024\_93643224

tccaacataggaattttagagggtactcaattcaatccataacaCTGACCTAGTTGAAAGGTCAG  
GTAGGCTCAGCTAAGAAAGGCATCAACAAATAGAGTAGCAGGGAAGACATTGGTGGCCATATATG  
CATTTGATTTTCACATATTTGACATATGTTATAAATGCAACAtgctagccgctggatatacagac  
atgga

>chr8\_98396624\_98396824

cttcccacagctccatgaggcagtgtcccactgagaactctgtgtaggggtccaacctcatatt  
tcccctttatactgctctatttagaggtttctgtggggcttctgtcccctgcagcaggcttctgcc  
tgagcacctaggccttctcatacctctctgaaatctaggtggaggctgctaagcattcttctact  
cttgc

>chr8\_110188424\_110188624

tccttcttcaaagggacctccctttcattgaaggagtttagggctctgtaaactggctcaaactcg  
gaaattaattgagtactatggctttgttcttatctcagtgtagacttttttctacttgactag  
aacttttctgtttatacagatcaaataagaatgtagagggttcttatctatcttctacttctagga  
acacc

>chr8\_110948824\_110949024

TGACATGGAAATCCATCTATTATATACAGTCAATGGGATTGCAATACCCAAATCTTCTCTCAAG  
GAAAATAGATGAGGAGATTTCTTGGTCATAATCAGAGATTGCAATGGTGTGAAATAGGCAACATA  
ATATGAATATCTCTTAAATATAAAGGCCAAACTAACTGATCTGTTTTTATCCATGCAACTATT  
TGTTA

>chr8\_111957424\_111957624

ctccaatccacggttgatggacatctgggttgattccatgtcttttgctattgtgaatagtgtctg  
tgctaaacatatgaatgcaagtgtctctttgggagaatgatttattttcttttgggtaataaatt  
cccagtaatgagattgcaggctgaaatggtaattcgatttttacttctttgagaaatcttcaaac  
ggctt

>chr8\_115346824\_115347024

TAATTGTAAATTGTGGACTGAATTTGAATTACTTATTTTTTAACTAGGTTTTTTTTCTAT  
TTTTCAAATACCATAAATACACAATAAGTAATACGTATATAGTGTCAATTGAATCTTGTTTTCAA  
GAAGATAAATTCACACCATTAATGGTTAATGAATGATATCTAGCTGCATAAAGATATCTGAAAAA  
TGCTA

>chr8\_120335019\_120335219

attccatgtctttgctattgtgaatagtatgggtgaacacatgagtgcattctctttttggtaga

atgacctgtattccttaagagtatataaccagtaataggattactgggtcaaatagtagttctaa  
gttcttcgagaaatcaccaaactgctttccacagtggtctaaactaaccttacattcccactaactg  
tgtct

>chr8\_121099019\_121099219

TTCATTATCTCTTTAGGTTCTCTTCAAGCTCCACTTTGTCCCCACATAATAATCCACTGTCAC  
CAAGGAAATGTAGCCCCGTCCCCAGGTCTCATTGCTTCTCTCATGGAGTAACTGTGCCAGGTTAG  
GCTGACTCCACTgtaggagctcagaaaatgacacccccaaaatacaatgctttggcttggtgagta  
cttag

>chr8\_121911819\_121912019

cattctatgaagccagcatgaccataataccaaaaccaggaaagggcataaccaaagagaaaac  
tacacaccaatataccttgatgaatatagatgctaaaatctttaaaaaataactagctaacggaat  
ccaacaacatatcaaacggtaatccaccatgatcaagtgggtttcataccagggatgcagggat  
ggttt

>chr8\_140536418\_140536618

AACCCAGCCATCTTAGGGCATAATTGGTTTTCAAATCAAGTACATGAAAAGGGACAATATTTAAC  
AGTGAAATCTCATTAGAAAATGGAAAGAGATTAGATTTGATCATTCCACAGAATTGTGGGATCAT  
AGTTAGAGCTTCCCCAGAGTTCATGAGTTTTGAAATAAGCAAGATAAAAACCTTTAGGGGGAAAGC  
TGTCA

>chrX\_23051879\_23052079

caccatggttggtcaggctggtcttgaactcctgacctcaggtgaccacctgcctcgtcttccca  
aagtgctgggattacaagcgtgagccactgcgccagccgtatattcttatataattttgagt  
ggttgctataggaattataacatttataactaaacttattattatctacatagaatcaacgttcta  
ccact

>chrX\_28391879\_28392079

AGTTAGATAATTCGTTGTCAAAGCTGATGGAATTCTGGATAAGTGTAGCAACCTTTGAGGAATA  
CAAGTGAGATTAatacagtttaattggtagttgtcatttattcccattcttttctacatactttca  
tataacacaatgtagaaagctaaaaactacattatctgactctcttcaagctaggcctctaaatg  
gcagt

>chrX\_31586079\_31586279

gatgttttattttcattttattttagttctttgtggttaaaaaatttttctttgcaacctcctcct  
tgacctggggaaaatgatttaaagggtgtgctgcttcatttccaagtgttttgaggtttttctttt  
gtctttctcttattgatttctagcttggtttcattatggttctgggaacatataagttgaattctc  
taaat

>chrX\_32524079\_32524279

ggaaaaggtaaaactatgtaaaactacaaaacaatcagtggtttctagagattaggagagaagtg  
agatgaacgggaaaagtattgaggatttttatggcagtgaaattacaccgcataacactctaaag  
ataaatacatgtcattgtaaatgttttaactcacagaatgtgtggcaccaatagggaaagcta  
atgta

>chrX\_42083456\_42083656

cttgttccggttcttagatgaaaggctttcagcttttccccattcagtataacattagctgtgggt  
ttggttgatgtggactttattattttgagatatgctccttctatgcctagtttggtgagagttt  
tatcataaagggatggtgaattttatcaaatgtttttctccatctattgagatgatcatatgat  
ttttg

>chrX\_49408243\_49408443

gtcttttagacaataactttaactctttcaaccaattgccaatcagaaaatctttgactctatctgt  
aacatggaaggacctccacacttgggaattgtcctgtcttttctgaccgaaccaatgtacatctta  
catgtactgattgatgtcttattgtctctctaaaaatatataaccaaactgtacccaaccaccg  
tgggc

>chrX\_51392260\_51392460

gctggaggcatcacactacctgacttcaaactatactacaaggctacagtaacaaaaacagcatg  
gtactggtacaaaaacagagatatagatcaatggaacagaaacagagccctcagaaataacgccgc  
atatctacaactatctgatctttgacaaatctgagaaaaacaagcaatggggaaaggattcccta  
ttaa

>chrX\_51919260\_51919460

aatgctcatcgtcactgcccacagagaaatgcaaatcaaaaccacaatgagttaccatctcata  
cctggttagaatggcgatcattaaaaagtcaggaaacaacaggtgctggagaggatgtggagaat  
aggaacacttttacacagttggtgggactgtaaactagttcaaccattgtggaagtgcagtgtggc  
aattc

>chrX\_56194275\_56194475

AAGTTTAAAGCAAATCAAACATATATTACTTAGCAGATTTTAAATGAGCAAACCAAAGTGGAT  
AAATTATTTCCATCCCATATTCAGATATTTTTAATGCTGAATTTTCATAGCAAATACCACAGTAT  
ACCCATAAATGGAGCTATATCTCCACATATTTTTCCACCAGTGGAGATTTTTATCAATTTGAAAA  
GCTGC

>chrX\_62820075\_62820275

ccttcagttctgctctgattttacttattttcttgcttctgctagctggtgaatgtggttctct  
tgcttttctagttcttttaattgtgatggttaggggtgtcaattttgaatctttcctgctttctct  
gtgggcatttagtgctataaaatttcctctacacactgctttgaaatgagtcacagagattctggg  
atggt

>chrX\_67588275\_67588475

catgaggctgaggcagagaatcacttgagcccaggaggcagaggctgcagtgaaccataatcaca  
ccactgcactccagtctgggcaacacagtgagaacccccatctcaaaaaaaaaacgcaaccatgta  
tatggggaatttagaaagccacatgcatgccccagaaaaacaagcatactcagaaaattcctgaga  
ggact

>chrX\_72268875\_72269075

ataagcccctactttaattggaggaccgtaatgatgttttgggtcatttggagtcaatgtcagct  
cagagctagtgtccactagtcccaaaaggtctgatcattcccctttcccagtgacagagttacc  
ctggtaaaaggctgttaggtcctcttgggaaagatgggagaaagataaacattataaattgtcgg  
tagta

>chrX\_86582544\_86582744

gctctgtatttctctagggagaaaatcccaaatacaacccaaaagctctctgccattgacactgc  
agtggactgcacttgctgccttgggctggagaaagaacaagaccctgatgactttgttggca  
cctccagcatgctgcagccaccatacagagaggagccagctctctcttccctgtgagtccagac  
ttcct

>chrX\_90388144\_90388344

tgggtggattatttgagatcaagagttcaagaacagcctggccaacatggtgaaatcccattctct  
actaaaagtacataaaaaaaattagctcagcctgctggcacatgcctgtattcccagctacttgg  
gaggctgaggcagaagaattgcttgagcctgagaggcagaggttgcagtgcagctgagattgcacc  
actgc

>chrX\_92207344\_92207544

atatactgggggttagtatatattagcactatctggtgaaaggccttagaacaacatgagatgccag  
taacaacaaacacatctagtgccaggagttggtgtctaattccattcttcaacaaaagaactg  
aggatccttgagaagaggatggagctaggcctgaggcagaaaatatataggattggcctggaga  
agttt

>chrX\_94211544\_94211744

TGAATGTTCTGCTTAAAAGATGGCATCTGCCTGATACTTatggttatcagaggctatgaagggtg  
tatgtaagttggggagtggggatgaagagaggctgggtaatggatataaacatgtgattagatgg  
aagaaatagtccctagtgttcaatagcccagtaggggtgagtatagttagcaacaatgtatgtaca  
ttcc

>chrX\_95364744\_95364944

tagatttgaaggcctgagaatattcctctgtggcttgatgctctattctctgcatctatggctct  
gccttttagagtaatttttttcttcactttgtcctattttcttctcaatcagtcaggctggcaac  
attttttgtagtataaaaattattttaaaatgtattggctcctgtccaacttatgggtgattcaa  
gcat

>chrX\_104496344\_104496544

cactgggctccatgtttgaggacttgattctgatcaccatactaccattaacatggataagtaa  
ttaaatacactggacctcaatttccccacatataaaaatatatgtaattaatagctgttatatac  
cctagacatgttataaaagttaataTAAAGTCTTTACTTGAGATTTGCTACAACATATAGAAA  
TGGAA

>chrX\_109912744\_109912944

GAAAAATCGATGTATAAATCTAATATTTATCATTATTTTAAAGACATCTTATGGCAAATCAGT  
TTACAAAGCAAATAAGACCTTTTTTTCATTTGTACTTATTAACACAGGTTTTATAGTTTTCTTT  
GGAGTAGGGTACAGAGAAAATGTCCTGAAAATCTGCCTAGCCTCTGCATATTTATGTATTCCTG  
AACTG

>chrX\_118661572\_118661772

ATGTGTCACCTTCTTTTAAATATTAATACCTCATATATTTTCTTAAAAAAAACCTTTTAAAC  
tagagacagggctctcaccatgttgcttaggctgctctcgaactcctgggctcaagcgatcctcct  
gccttggcctcccaaagtgtagaattacaggtatgaaccaccctgcctggcTCCCACATTTTTC  
ttaat

>chrX\_124363119\_124363319

ataatggagtcaaaagataactatgtcccaatccctggaacatgtgaattttaccttatgtggca  
aaaaaaaaaaaaagactttgcaaatgtgctttaaataattgagatagggagactatcctggatta  
tctcagtaggacctaattgtaatcacatgtacccttataagagggagacagaggaaaacgtaaca  
tgcg

>chrX\_124389319\_124389519

gtgacagcgtgctggcagtcctcacagccctcgctcgctctcggcacctcctctgcctgggctcc  
cactttggcggcacttgaggagcccttcagcccaccgctgcaactgtgggagccccttctgggct  
ggccaaggccagagccggctccctcagcttgaggagggtgtggaggagaggcgagcgggaa  
ccgg

>chrX\_127070719\_127070919

ggggaaatgaccacaggatgagtcaggacacactggaccagtgtaagtcacacctgagctaa  
aactccattaattatctgacctctataagctcctactttaactgtaggaccacaatgatgttttg  
gatccctggaatcaacatcagctcaaagccagtgccagtagtccccaaaaggctgataattt

ccctt  
>chrX\_137766134\_137766334  
TGTCCACTGTTGTAATCACGAGCAGGAAATAACTGTTTCATTTCCCTAGGTATATCCCATCTATTT  
CAAATATGATCCCCTGGCTACTCAGTACTAAAGAGCACTCATTAGATCTATATTCTACATAACCT  
CATTGCTGTAGattttattaaaaatttaataatGCATGCAAAGTTAAGGGATTTATTACTTGCAA  
AATAG  
>chrX\_140465734\_140465934  
acacatggacacagagggggaccaacaaacaccagggctctcttatgggggtgtggggcgaggggag  
ggaacttagaggaggagtcaataggtgcagcaaaccacaatggcatatatatacgtatctaaca  
acctacacgttctgcacatgtatcctggaacttaaaGTTTTAAAAAGCCATTTTAATAAGTGTGC  
GGTAG  
>chrX\_141127734\_141127934  
ctgaggccttcccagccgtgtggagctgtgagtcgaattaagcctcttttctttttctttttctt  
tttttaataaataaacatttttaattttgagagagttgtagattagcctcttttctttatcaac  
taccagtccttgatatttcttcatagcagtggtgaaaatggactaatatagtaaactggtagcag  
atagt  
>chrX\_146081708\_146081908  
aggagctgctaaattctacaacacctaataagctcctacctaacaagagctgcttaacatgtaaac  
ggcagtcceaaggtgaacagatgtcttgtttggaaggctgctattctgggttaaagggtcaagaaa  
atcattttcttttgagttatttggtggaagtatgttttgtaacaaatttacctttctctctga  
gttct  
>chrX\_146478108\_146478308  
tgaagtctgtgcttttagtgtaactatcacctgaattgtgtacattgtaccattaactaatttt  
ttatcccagaccactccaaacttcataccgtctcattctctcacccttctgagtcctcaagtt  
ctattattgcactctctgtgacctgtgtacaagttatttatctcccacttataagtgagaacat  
gcagt  
>chrX\_151663944\_151664144  
agttaagtgtggttgagctgggtcacatggatgctgctggatctgtagtgaagtctacagttgg  
taggcctttacttgaggctcagttgagcatgaatcctatgtgggtccctgggaagacaggactgc  
ctccagaaattggtcagtggggttggtgctggaacaagggcctacaattggatctgcagttgga  
tccac  
>chr13\_26298800\_26299000  
TGCTGTCTAGTCCTTGGGTTCATTTCCCTGGGAGTAAGGAAGAGAAATAAATCCCTTCCAGTAGGAA  
TATCTTATGGTAGGCATGGAAAAGTAGAAGAAAATGAGGTATCTGTTTTTATGATGTCCTAGGCC  
CATTGACCACATCTTGGGCCACAAAGGGTGTAGACAATTGAGTGAGAACAATCAGTATAAAGTC  
TAGAT  
>chr13\_34158200\_34158400  
ccattttacactcccacaagcagtgcaaggggtcaatttctccatatctttgccaacacttgt  
tattttatgttcttctttcctttttgatagtagccctctgtattagttcattctcacattgc  
tataaagaaatacctgagattggataatttataaattatgaagaaaagaggttaattggctcat  
gggt  
>chr13\_38680400\_38680600  
actggaacatccatattcataaaacaagtttctagagacctataaatacacttagataaccacat  
aataatagtggaagacttaataaccctactaatagtggttagatagatcaatgaggcagaaaacta



accaagatatctgggatctaaacaggaacatctgactaaaatgattaaacaacatgtacagaat  
tcaact

>chr13\_46997999\_46998199

tttacgctataattcacaacatcagcccactctgaatgggattctctgcaacaagaggttctagaa  
tctgccaacttgaaattcaacaagcagtctcatgagatcccctaagatttcCATAAAGGAGA  
Acttctctggttttaattctattgtcagatgaaatcacgctgaagaaaatcactttctcacagaac  
aactg

>chr13\_62539799\_62539999

CTTAAGTTCATTTATCATGTTCATGGCCTCCATAAATCATATACATTTTACCACATTAGATTTGAT  
GTCTAGGATGCACATAATCAAGATGAATGCTGCTCTCATAATTATAGCTTCAAACCTGTGATTCA  
ATGGGCTGCCATAATCATCTTTACGAAAGATCACCCACATATACTGATAATTTTATACAATTTG  
CTTAA

>chr13\_68063999\_68064199

AAAAAGAAAGAAATGCATTATATATTGAAATGATATGATAAACTCAAATTATTTTAATCAAAT  
AAACATATCTTATATAAACTATTAACCAACAGTCTTATCAccatcaaaaccaccattgtcaaga  
tcgtcaaactcttcagcctctcagttctggtggtttattctcaatcctctctcttgacttcttattc  
aaggc

>chr13\_69162399\_69162599

catagaaccacaatggacccccaaaacttgagaaaaatagagcaaaactgaaggcatcatgcttc  
ctgattacaaaatgtattgcacaactacaccactacaataatgaaacagtatggtactggcata  
aacacaaacatatagaccaatgtaacagaatagagagctcagaataaaccacgcatatacgggt  
cagct

>chr13\_74985399\_74985599

ACCTGAAAGATGAAAAAATATTTCTTAATTTGATTCTTGCTAATTTAAATTCTCAACCAAATTA  
CTTTAGTGATTAATTTTACACACGTAAAAATGTTAACATCTTATTTCTTAGTTGGCCTTGGAGT  
GTTTCTAGATTATTCTGGCTCTTCTGCAGAAGGTCTCAAAAAGAAATGTGGTAATTTATCTTCTG  
TAGTC

>chr13\_82489399\_82489599

GAAGAATGAAATAAAATAGAAAACATATTACAATGTAAATGAATAAGAAAGAAGTAAAATTTCA  
GAATATTTTGAAATGCTGACTTCAATGGAGTAGAGGATGATATTTACTCTTGGCCGAAGTAAATA  
GTAATGTATTATTTTGGAGTGACAAAAGTTTAGTTACAggcctggcaggggtggtcatgacctg  
taatc

>chr13\_84044799\_84044999

gtttgTATTCGGGTCTCATATGTCTTGACTGGACTATTGGAAATCTTCTGTTTATTTCAAGATT  
TCGATTATTTTGCTATTCTAATCGAATTTATATCTTAccagaattatcttcctaaattataaatt  
tgacctgttattccagttttcaaaaaccaccagCTATCCTGCATACATTTAAAAAAGATTGTCA  
GCATT

>chr13\_90359199\_90359399

TTTATTTCCATTTATATCCATAAAATATAATCCttattttaatttttaactaaataaaataatta  
taattaCTTTTACAGTGCTATTTTTCATTTTCAttggagaattataattctatatatttatgg  
gggtgcaaagtgatgctattatatatatatGTATATGTATATCTATATATATATATAcacacacac  
acaca

>chr13\_105910799\_105910999

GTGATAAATGTGACCTCTTCTTTAATTTGTCTTCACAAAATATGAAACATTTCCAAATAGAAAA

TAGTttttgactatctgttcctgcgtaacaaagtacccccaaatttactggcttaaataaaagca  
atgtgtcatgactctgagactaggaactcagggttaggcggcacagttctgcttctccaagtggg  
gttca

>chr12\_13484333\_13484533

atgtaggtactagaagattcagtgctggtgagaacacattttttgattcaaagggacaaatgag  
ctttcttgggcttcttttttagggcacaatcccattcatgagagcagagcctctcatgaataatc  
accacctaaaaggtcccaccttgtaagaccactgcattgggggttaggatttcaacatatggatt  
ttgaa

>chr12\_14053333\_14053533

aggaagcggaggttgacagtgagcagagatcacgccattgcactccagcctgggcaacaacagtga  
aactccatctcaaaaaaaaaaaagttaataaaacatttatgcacattgttccaaattctgaagc  
aaatacttccataactatcaccagattaagaatccataagcgtccaaaaatgtccctgtgtgc  
ccttc

>chr12\_14968133\_14968333

TGTGATTCTAAAGAAGGGCTAAGTGGGGTCACTTTTCTACTTTTGTCCAGTGGATCATCTTGCC  
CTTGATGTATCCAGGGCCCCACCACGTACGGATGTGTGGCCAGTGTATCTGAACTAGGTATGGAT  
GTTAAGTAGGATTTTAATAGATGTTTGGGGAGGATGGTGGTATAGAGGAAATAATAcagatagag  
ggaac

>chr12\_17903533\_17903733

TAGAGTAAACTAACACATTTTTAAAGTAACAGATATAAGTTTAATAGATGTAATTTACTAAGTA  
AAAGAGTCAAATTCATTATCACAAAAATGAACAATGATTTCTGAAGTAAAAGCTGATGAGAG  
GCACTCATTTGATGTCCAGCACTTTGCCCGTTGTTCTCCCATTTGTAAACGCAGGCATACACAAT  
TATGA

>chr12\_23186333\_23186533

CAGGAGTCTCTTTCTTTGGGACCAAGGAATGTAATAATGGTTAGGCAGCTGTCTTGGCTCATGA  
CACTCCCTGTCAAAGGAGAAGAAGCAGAGAGCAAGTGCAGTCCCTCCTCCCAAGTCTCTCTCTC  
TCTCTTTCTCTCATTGGCTTTTGTGTTGACCTGAGGTGCCATCTCTGAAGAGGAGCCCAGAATTCA  
CAGGA

>chr12\_24278733\_24278933

AGCTTCTTTTGGGGATatttttctcaatttttattctcttctccaccacaccattctggtttc  
tgtaccatcatccttcccaggacgaagagtggagctaggcctctaataaccagtgaatccaagag  
ggcctttcagatccgtatcttgcttggcatctcaatggcatttcaatggccatgggcacttcctt  
tccta

>chr12\_55663933\_55664133

TAGCTCAAGAACATTAAAAGTACCCAAAGTAGCTTGTGAAAAATGGATCGTGTATATTATTTA  
TTTGTaaactgacaaagacagtgcaaaaaacaacaaaaaatctcagagatcaatatataacatag  
atgtgctgcccataattctaaataaaattttagtaaaaacttcaacaacaaaataaataaaataa  
accaa

>chr12\_71799533\_71799733

ttgagcttgacagtgatccaagattgcaccactgcactccagcctgggcaacagagcgagactcta  
tctcaaaaaaaaaatggataaattcctaaaaatatacaaaactgtcaagtctgaaatatgaagaaa  
taggaaatatgatcacaataatagcaagtaagaagattaatcaacaattgaagacctccagca  
aagaa

>chr12\_75471133\_75471333

TATGGTTCTGAATGACTCATACAATAATTACGTTCCACACATGGTCATTTTCAGTAATATAACTTC  
ACAGGCTGTCTGTGCAAATTTTGGTTTGTTCCTAATGGGATATTTACAGTTCCTCAAACCAT  
AATTGAGAAAaacaaggtaaagtatctgatacaaatcatttcttggcattactcatttttaatta  
tttat

>chr12\_83482669\_83482869

tattagggacttagaagcagtatctcagggatccatgagataTAGGATGCATGAATCCACCCTCC  
AGAAAATACCTTTTTAGTTAGCAAATATTTAGGGCAAAGGCTTGTGCAGCTGGTCATATCTCATA  
CTTCCCTTGCCAAAATCATGACCACGGGGGAAACTAAATAAGCACCTTTATAAACTATGCTACCAG  
CATTG

>chr12\_98495069\_98495269

aggctcttttctgaccattgacatgggtgctgggagcctggccttatactctctccagagttccag  
ggaaaacctgtccagagggcagcttctggttcttcagatgcaaaatgcaaatgcattaaaacacca  
caataggggaatatgttcaaagatttgttagtcacagatcctgggcagagagggcaccatgagtca  
gaagg

>chr12\_99534269\_99534469

TAACATTGTTTGCCAGCTAAATGGAACAGGCACTCTTGTACCATCATGATTCATTGCCTACTGA  
AAGCACAGAGCTGGCCTTAatctaattcttaataaaaccttgcaactaggtatactgtctcaat  
ttgcacacggaaaacagatgttcacgaaggttgagggactggcccacgatctcacaccaagtagg  
taaag

>chr11\_24960224\_24960424

AATGATACCATATTAATATTTTCACTTATTTGAACCCCTTTATTTGCTTGTGGCTTGGATTTTAA  
TGGTAGTCTGCAGGAGTACGGTAGCAATCAAACACAGTCTTAGGGGTTGCCCATTC AATTCTGGC  
TATTTTGATAACAATACTTAGCTTTAGCTACATGGAATGAAGATGCTTTGTTGGTGTTTGACAAT  
TTGAA

>chr11\_37350624\_37350824

TCTAAATGTGTGTATCTCCCTTTACAAATGTGAGGAGACATCATTCTACCACACTGTTAATGAG  
GAAGCATTTGGAGTAGGGCAGAACAAAACAAAATGTGAACCTTGTGTTTGGTGAAGTTGTTTGATG  
GCAGAAGGAGAGATATGGTAGCTGAATGGCAGTTTGC AAGTGTGTCATATTCAGAGTTCTCAAAT  
TCCTT

>chr11\_37762424\_37762624

GATATCAAAGAAGATTCCATGAAAACATTCCAGTTGTTCCAGCTCCTAGCATCTGGAATGACT  
TACTTGGTCACTTGTCCCAGTATCACTTTGTAGTTAGAATTT CATCTGATTTGTACTCTACTTAA  
ATATTAACCTTGTAATTTTCAATTGCTTAACACTGTGTATGTTCTAGAGCTATTTCAAATCCTTA  
ATGAT

>chr11\_41066824\_41067024

agaccatggggcatagataaatagttggcaTCAGAAGAGAATCACTCTTTCCTCTTATTTCCTTTT  
TACATCTCTTCAAGCTGTTTCGTTCCATAAGAATATTTATAACCTCCTGGCATTGAAAGCAAG  
TTAGTGGAAGATAATTA CTCTCAACATTTGCTACTAAATGGATAGAGTCATCCAGACCATGGA  
GACAG

>chr11\_49764624\_49764824

aggggcaatgtctgatttatatagggctcatagattggtttgatcaggtatgatgtttacataga  
gtgcagagaaggctggtcaccccaccttaatcttattatgcaaataggctttccggttgattggc  
accatcttgtctgctctttacagtatacatggctggcagagaagggagaatggagctgccatct  
tgaaa

>chr11\_49890024\_49890224

gagttgataccattccttctgaaactattccaatcaatagaaaaagaggaatcctccctaactc  
atthttatgaggccagcatcatcctgataccaaacgctggcagagacacaacaaaaaagagaatt  
ttagaccaatccttgatgaacattgatgcaaaaatcctcaataaaatactggcaaaccaaatc  
cagca

>chr11\_80694152\_80694352

ttaattaaaatattaaatGTGCTGCCTGTACTTATGTTTATCATCTGTGAAACATTCATTTTTCA  
TACTTATTCTTTTGAGTTTTTGAGAGTATTGTTATGCAATGATTATTCCCAATGCCAAGCTATC  
AACAGGAGTATTTTGAGATAAAACAATGTGTTTACAATAGGAACTGTAGTGGTGTCTTTTGT  
GAAGA

>chr11\_81173152\_81173352

ttgtgttcttaactactgtgttctcgtttcttctgCAAGTTCTAACATCAAGGATTCTCCATTC  
CCTTGGTGACAGCATGCATCTGCTTGAAGCTGTCTGAGGGACGGAAGGCCCTCTGACGGCCAGA  
ACTCCAGCATATTTTCCACTTAGAGTTCTCTCAGTCTCTTACCAAAGAAGAAGAGAGACCTGAA  
GAAGA

>chr11\_85793152\_85793352

cttgattactgtagctttatagtaagtcttgaaatcaggtagtgtcagtcttcttattttgttct  
tctccttcaacgggtgagttggctattctgggtcttttgcctctccatataaactttacaattagt  
tcatcagtatccataaagaacatgctaggatthttgattgggattgcattgggaagaaccagcatc  
ttgac

>chr11\_87230152\_87230352

ATGCTAAATTTCTGAGTCCAAATGGAACTCATTCTGAAGTCACATGTCATCTTGAAGGTGTGG  
GAACAAGGCATTGAGGCTTTATCTGAATAAAATGATATCTTAGAAAACCCAGAGCTTCCAGAAGG  
TATACGATGAGCAGAGCTGTGGCTGGCACGTAGCAGGGGCTTCATCATACTCATGTGTTAGATGA  
ATGag

>chr11\_88921552\_88921752

CAATCATTTCTATGAGAGTTCTTTTGATTacatagtttggttagaaggtgctaagtgcacagataaa  
gcagaaatttagtgggtgtacagtaaatgtttaataacttggttctcaatggaggagtgggaaagtag  
ggagagatgattctgatttgccaattggtgtggtgtaataactgacaatggttagatttccatcta  
atgat

>chr11\_90127752\_90127952

GAATTTTGGCtatgagataatcgttaaaagcatgaactcggcaccacaagcagactggttttgcca  
atthttacttgtccttgtctagaacaagttatthtaacctctctgtgttccattttccttctctgtt  
atgtatataatgatcttaactaacttattgagttactatgaagattatattatthtatacaatggtt  
tgga

>chr11\_90936952\_90937152

caggataatthtatathtttaaaatattatathtttaattaaatgggtataggtgtctctagactt  
tttgatacathtaacatggtataaacathttccataaacagccttgcatgctthtctattatgctth  
ttctatacatgatatgattgttctctattataaatagtacctgtctgcaatgtattgactacatga  
tgcta

>chr11\_91754952\_91755152

TCACTCAGGGATCATAGCCCTAATTGGCTTCTTCTTGTACAATGTCAGAAAACAGTTATTAttat  
tathtttaataactthtaagttctggagtacatgtgcagaatgtgcagthttattacataggtatac  
acgtgtcatgggtggtttgctgcacccatcaacccatcacctacattaggtgthttctcctaactgtt

atccc  
>chr11\_97899790\_97899990  
cactttgtgcctcagttgccttatatatttagtgcattcaacctatgggttggtgtaatgataaagtt  
aatcagcgtttgtataccacctaataatgtctggtacagagttaatgctATCTCTCTCTTTGT  
TAAACACATCTGCATGAAAGAACACAGTGATTTTGTAGTCTCTTGAAGTTCTAAAAACAACAAA  
ACAGC  
>chr11\_99050190\_99050390  
aataaaaaTAAACAAAAACAAACATAAAAAACAACAAAAAAGAAATTTAACTAGTTTACCTA  
GTTTCATATAGATATTTCTAAAGAGTTAATGTAATTTTATGGTTACATTTACCCCACTCCTACAAC  
TCAGGATGATGCCATATGATCCATATGCCCAAAGGCTGTATCAAAGGATAAAATAGGATTATTTT  
TAATT  
>chr11\_109223190\_109223390  
aaaaatattcgttttcctcacttcccttgtggctagggtagaggcatgtagctttggtgcttgca  
agcagagtactgtggccaaatattgaaactggaaactagtgcacaaagaaaaagtttagactgggaa  
aaactaccaaggcaaggggtggtggcagttgcatctgatttttgaagcaggaacatttgagcaacg  
ttgga  
>chr11\_114964790\_114964990  
caacttattccaagtggctttgggaaagagacagaaggaacacctagaaataagagaaagctac  
ctagaaacatgtttaaggagaatatgagaagatgtttcctaatggttatggttgcctaaaattgta  
aaagatttctgggtaggtaatgatctccctgatacatggggaattcaaaccaaggctgggcagc  
cacta  
>chr10\_25054194\_25054394  
ggagacactttccccgtggctcttggggattaatattaggctccttactacttatgcaaatttctg  
cagctggcttaaatttctcctcagaaaatgggtttttcttttctactgcatcatcaggctgaaaa  
ttttctgaacttttatgctgtgtttcccttttaaacagaatgcttttaacagcatccaagtcac  
ctttt  
>chr10\_36578394\_36578594  
tttatgacagcacaatgccattttggatactatagctctgtagtaaaatttgaagtcaggtaatg  
tgattcatccagtttcggtggtatgtttctgtttttgattttgttttgcttaggatgactttgg  
ctatttgggtccttctgtcattctacatgtattttaggatttttttctatttctgtgaagaatgac  
attgg  
>chr10\_37984594\_37984794  
tcaactaaaaccactcaacgacattgaaactgaacaacctgctcgtgaatgactactgggtacat  
aacaaaatgaaggcagaaataaagatgttctttgaaatcagtgagaacaaagacacaacatacca  
gaatctctgggacacattttaaagcagtggtgcagaggaaaatttatagcactaaatgccacaaga  
gaaag  
>chr10\_49012194\_49012394  
TCTCAAAATTTTGATTTAGAAAATGAGGTATTTTAGTATGTTAATTATAGGCATCTCAACTGAGA  
AGTCTAATAGCATTGGGCCAGAATTGTCGCAGCAGTCCAAAGCCATGGATAAACTTAAGTTAAAG  
GGAGCAAATACTAACAGCCTTCCAATTAATCTGTATTGGAGAAGATGATAAACAGATGAATGGG  
AACTA  
>chr10\_57890794\_57890994  
tcacaggcatgagcaaagactttatgatgaaaataccaatagcaattacaacaaaagccaatatt  
gacaaattggatctaattaaactaacagctctgcacagcataagaaactatcatcagagtaaca

ggcaacctatataatgagagAACATTTGCAATCTACTGATTTGGCAAAGTCTAATATCCAGAA  
TCTAC

>chr10\_69203594\_69203794

TTGCTTTTGGTGTTCAGACATGAAGTCTTTGCCCATGCCTATGTCCTGAATGGTAATGCCTAGG  
TTTTCTTCTAGGGTTTTATGGTTTTAGGTCTAATGTTTAAGTCTTTAATCCATCTTGAATTACT  
TTCATTTcagaattggacagatctccagacagaaaatcaacaagaaatgtaatatTTAATCTG  
TGCTA

>chr10\_100302410\_100302610

CCAAGGCTCGAGAACTACGTGAAGAATGCAGAAGCCTCAGGAGCCGATGCGATCAACTGGAAGAA  
AGGGTATCAGCGATGGAAGATGAAATGAATGAAATGAAGCGAGAAGGGAAGTTTAGAGAAAAAAG  
AATAAAAAGAAACGAGCAAAGCCTCCAAGAAACATGGGACTATGTGAAAAGACCAAATCTATGTC  
TGATT

>chr10\_109600610\_109600810

ATTTTGAGGTAATATTTCACTGGGGTTTTATTTGAATTTCCCTGACAATTCATTATATTGAAATT  
TTTTTTCATACCTGCTGGTAATTTGTACATCTTCTTTGGGAAAATGTCTATTCAGGTTCTTT  
GCTCAGTTTTTAATTAGGCTGTTTGTGTCTTGTGTTTTGTGCTATTGTGTTACATTAATTCCTTA  
TGTGT

>chr10\_113814610\_113814810

AAAATGATTTACATCACAAAAAGCAGCCTTCTCTCTTCAGACACAAGTTACAGATTATTAGCT  
GTTCCCTTGTAATAATGCCCAACTCAGGGCCTTCTCTGCATTCAGGGCAGCCTCATATGGGCC  
AGTTCCCTTCATGTTTTGATCCTATTTCCCCTCATGAGGATACCCTCCACATTTAGCAAGGCCCT  
TCACA

>chr10\_114114810\_114115010

TTCATCCCAACAACCAAAACAATAACAAGTCATTCATTTCCCTCATTTTCTTGCTGTAGGTAAGGT  
AGGCTGCCATACTTGATTCTTTCTCATTGACTTGCATTATCACTGATTAATTTATTATATACGCC  
AAAGAAAAGCCTACTCAAACAATTGATAGTTTTCTATTTAAAACCAAGCAtttgtttcttcttct  
tcttc

>chr10\_130506210\_130506410

TCAGGAGAAATATTAGCCACTGCTAAGTAATTTACTTTTCTTACAATggactcaacaacttta  
tctgtaaagagccagatagcctcggggcatattccaccctgccatggtaacgtgaaaacagccat  
agataaccataaacgaagggccgtggtgttcgaacaaaactatattggtggacactgaaattgg  
aactt

>chr10\_132179610\_132179810

CCATCTTGAATTTGTAATAATTTGAACAAGGAGGTTTCATTTCTTTTGTACTGGGATCTGC  
AAAGTATGTAGCTCGTCTCTGAAGCTAATGTATTTTTGGGGTCCACGTGCTCAGGGGCCCAAACCT  
TGTACCTTTAGCACCTCAGTTTCCCAGTCCAGCTCTGGGCCCTGGAATTGCATCAGCCTTGCTC  
TCAGG

>chr10\_133174810\_133175010

CCCTGCGAGTGAGGTTCACTTTGTGATGTGTCCCATAGTCCGCCACATGGGTCTCAAACCTGGCC  
TGATCTATGCTTTGGAATCTGTTTGGCCTGCAGTTCTTGAGGAAGGTAAGTTCTCACCAGGGTCA  
CCCAGAAGGGTACCTGATTTTGTCTTCTTGGCCTGCTGCTCTAGATGGAAGGGCTACCTGGCA  
GCTGC

>chr17\_9491075\_9491275

ATACTTTTTcagatgccaagtttgcaatatttgcttattttctgcaagGCGTATTTCCAGAAGTG

ACAAGGGCCCTGTCCCCTCTAATGTTCTCTCTTGGCCCGTCTGTATTTTCAGTATGCATTGTCTGA  
AAAGCCTCTGAGAAAAATACCATAAAagtgggttttcaaagttggctgcatggtgaaatcacctgg  
gcagc

>chr17\_69851805\_69852005

TTACCTTCTGGAAACTTCCATGAAAATAAGCCACTTCCCTCATTAGCATAATTTTCTAAATATGA  
CAAAGCATCTCATTGAAAACAAAATAAAACAAAAGACAAAGAGTATTCATCTTTTTCAAGTACAA  
TTGCCGCTTCTGAGTGGCTTAGTAGAAGTGTTAAAATAGCTTCCATTTAATAGTTTATAATAACA  
ATAGA

>chr16\_61817299\_61817499

aaaaagaaatgagcaaagcctccaagaaatatgggactatgtgaaaagaccaaactacatctca  
ttgggtgtacctgaaagtgatggggagaatggaaccaagttggaaaacactctgcaggatattatc  
caggagaacttccgcaatctagcaaggcaggccaacgttcagattcaggaaatacagagaacgcc  
acaaa

>chr16\_74051299\_74051499

CATTCCAACGTTTCTAACTTCCCTGAGGAGTTGAATGCCTAGTGTGGCATCTAGCACActcactca  
cttggggctaccatattgaaatccagaatctgtgctaagtcaatccatatcaacaaattcagccaa  
atntaaaattataactctttccTTGTTTCATTTGCCTTGAGAATCCATTTAGCAGATTTTTGCAAAT  
AAAAA

>chr15\_39057108\_39057308

aatcatttctgcataactagtggtaagtggagcactcttgaggaaacaTGGCTCCAGGGCTTTCA  
TGAAGCAACCATTTTCTTACTCTAAAACATCCTTACTGTAAACATGATGTCAATATTTCTCAGA  
TTTCTCCATTAAAGTACTATACATGGCAGAAGAGAGGAGACATGTCCCCCTTCCCTGGGTGGTCT  
ATCTC

>chr15\_47377108\_47377308

atccccatgcaaccaatttatgaacattttgcagaatcagatttccccgctgcttacaattttgta  
ctttttggtaagctaagtcagttaccagccattcatggacttctattttcaaaaatgttgctgt  
tttcCTTTTATATCACTTCAATAAGCCATTTGCCATCATGTTATAGTTTTCAGGTGGGAAAATAAG  
TCTCT

>chr15\_98250996\_98251196

ATTTTCCAGTGATTAAGGCTTAATACTTTGAGCAGTCACACATACCCGTTTTTTTATATTTTTGG  
ATGGAACCTTTGCTAACAGTGAGATCTGTTATTAACACATACTTACATATTAGAAGAATTGGAAT  
TGCTCTAAGGTATCATTATACTGAATATTAATTTAGCCTTAGGGTGCAATAGGAGTGTCTCCA  
GGAAG

>chr15\_98476996\_98477196

aagacagcaaaaagaagcaagtcacctggaccagccaatgcaaacatttattcctcctaggcctc  
tgggcctgtgaagttagggctgccttgaagacctctgacattccttggagacattttggccattg  
tctgggttattaacatttggctccttgttacttatgcaaatttctgcagccagcttgaattcctc  
cttag

>chr14\_19522000\_19522200

aaagtcagcttaattaaagggttaacatccagatgtgtgtgcatgtgtgcatgtttgtatttg  
aaaggccttcatgttttttgttttttgttttttactctcctaagaccttgcctttttgtttg  
tgttgagcaaatgtgtttatgtttttttgtccttttttctcagttgactgaattctgttttca  
cttga

>chr14\_25978760\_25978960

ttgatgattcaggatgagtagaccaccataaattagccacctctccttgttctaacatcagagca  
tctTTAATGTAGCATTACTAGTTCCTGGATTTCTCAAAGGCGAGGAGACCCACATACAGTGCTGA  
GCAGTTCTCTTGAATATTTCCTCACTTGGCTCACCTTGCCCTCTGACAGGGGGCAGGACCTCATG  
AAACA

>chr14\_26296960\_26297160

AGATACACAGAATATTGATGCTAATTATTACATCCATCCAATAAGCAGAAGGAAGCCTACGGTTA  
TCAGTGAAGGTCTGTCCCGGATTCTGGAAGACTAGTAAGACCTTACCTAACTTTCTAGTATCCTT  
CCTTCCTTGTTTTTCCCTTCATCTCCCTTAATCATCCTTTGAGAGAAGAGGGCTAAGTAATGCAA  
AAAAC

>chr14\_27813560\_27813760

gtgacttctccttctccttcaccttctgccatgattgtcaggcctcctcagccatgtgaaactgtc  
agtccattaaacttacttctttataaattaccagtttcaggtatgtctttattagcagcgtga  
gaatggactattacaAGAACATATGGAGAACTAACAATTTTATTTAGAATTTTTTTTTTCTAAT  
GATTG

>chr14\_42833850\_42834050

GTGAATCTTATTTCTCAATATCCTGTGAAAGTTATTTTCATTGATAAATTCTACCTAATTTACCC  
CAATGTATTCCCTACTGTGAACCAACAAGGAAGACTAAAGAGTAAGGTTTCTTGATTGACAAAAT  
AatactcataaatatacttgcacattcaagcacacacacactcacacacatgcacattcatacaG  
TTCCCT

>chr14\_44504050\_44504250

cacaatctcccttctcccaaacacacattatcttatcgaattatcatttgTTTTTTTTTctc  
aaggcacctattgcataacagtagaaaatatctgttatttatacatttctctaattgaatgta  
agctctaccgtgccaatgatttcatTTTTtagtaccggatcataattgcctaggaaaaaaaccgga  
atatg

>chr14\_47418250\_47418450

tttaaaacactttcaaactgattagcttatttgataatcctaaaattatgtgagccatgggaagc  
agatttatcatctcccattttacagatagaggaagcaaggccacaaagaattaaatggcttgcac  
agagctaactctgttagaagatgttaaaatcTTCCATTTCATGGGAGAACTTTCTTTACATACTGAC  
CAAGA

>chr14\_48431650\_48431850

ATTA AAAACAAAATAATACGTAACAATCCTAATATCAAAGAGGGCAGGTGGATAAGGATGAATTGT  
CATCTTTTGTGTCTTTATAGTGATTTAATAAACACGTTGAAAAAATACAAAATGTTTAAATTCAA  
TCAACTAAAATTATTTAGTAAAAATAAATAGCTCAAGAACATTTAGTCACCTCTGTGAAAGCCAA  
TATAG

>chr14\_66967247\_66967447

atTTTTAAATTAATAAAAAGAGCATCATTTGAATGTTTTAAAATTATGGGTTTGTTTTTTTTTT  
TAACCACTACAGTGAGTTTGAATTCGTATATGACCTCCCTCCTTTTTTTTTTTTTTCTTGTTTGT  
TGTTAACTAAGGCATGGAATAAAGTAGTTTACTTGGTAGCTGAGGTTGTAACCTCTTAAAAAGTG  
AATTA

>chr14\_72834047\_72834247

GGAATGTGTaagaccctacagagtgcctctctagcctctgttttaacaatctgcaatgatggatg  
tcatctctccttccatctttggacaactttgaccttgagaaactTTTTTTTTTgtaataaaccta  
ccagcctcctcttgcttactgcattagtcccaattctacctctgtatcaciaagaataGAGGAA  
TGGAT



>chr14\_98981047\_98981247

CCACTGGGAAATGGAAAACATCAACTTTTAACCCCTAgtttttcaaccatagcactattgacaatt  
aggcctaggttaattcctttgttgccataggggtctgccctggacactgtaggatatgcgacagcat  
ccctgaactccaccactaaatgccaatagcatctccatgcccttagtgtgatagccaagatgtg  
tcttc

>chr14\_107076355\_107076555

cttagccaaattaattgtgtgtgtctcaaccattgtatatacactaaaaacaattttactcttct  
taaacagtgccatttttacttattttataccactctctaaattccttgaatatcctctatatgt  
ttaccggactatagttttggctttgaaagaatttcaaataaatgacattatacaTTGTCATtgaa  
atgac

>chr19\_4613400\_4613600

ttttagcctataggttcctatccatcgctttctctcttttttttttttctgtgtaatttatttgct  
gatgaTGCATTATTTTATTTTAGGTGTATTCAAAGAACATACACATGGATTTTGTATTCTTT  
Gttgtttctatgtatgcaatctgacagcctatgtcttttaagcgatcagtttaattcatttatat  
ttatt

>chr19\_22553760\_22553960

ctatttttagtagagacgggggtttcaccttgttggccagtatggctctccatctcttgacctcatg  
atctgcatgcctaggcctcccaaagtgctgggatcactgcaagctccgcctcccgggttcacacc  
gttctcctgcctcagcctcccgagtagctgggactacaggcatgcgccatcacgcccagctaatt  
ttttg

>chr18\_4033600\_4033800

gtagagcatatgcattttctatatctctgccaaaatatttctattatcaaatttaaatttttt  
ttccaaataattcgggtgaaaaatggtatcttcctttattttgacttccctgattaccactgaa  
gtttagcaactttttttttttttttttttgagacagagtctcgctctgtcaccaggtggagggca  
atggt

>chr18\_7522400\_7522600

accagcagttactagtgtttaatagctgggcatgggttaggggaaaaagagaaatagcgcctacc  
caaaccactgtcattccagtgtaattTTTGTAAGTTAAGAACCCTAGGAAAAAAGAACTTTAA  
AGTACAATATGGCAAAATTTgccaggtgtggtggctcactcctgtaatccccacactttgggagg  
ctgag

>chr18\_27254602\_27254802

aataagtctcacgagctctgacggtattataagggggagtttccctgcccattctcattttcttt  
ttgcctgctgccatctgtgtaagatgtgatttgcctccttgccttctgccatgatcatgaggc  
tttccagctacgtggaactgtaagtccaattaaatctcttttgtaaattgccagtttcaggta  
tgtgt

>chr18\_29839402\_29839602

ATGAATCACTGATGTGTGATAAAAACATGATTATATGAAAAttttttttttttttgagacagcgt  
ctcactctatcaccaggctagagtgcggtggtgcaatctaggttactgcagccttgatctctt  
gggctcaagtgatcctcccgcctcagcctcctgagtagctgcaactacaaggcacatcaccacac  
ccagc

>chr18\_37906402\_37906602

TACAAAAACCTTCCTTATCAATTTTCCACTTCTTTTACCTTCTTTTCTCATTCTATGACAAAA  
TCCATTCCTTGTATTCTAAGTTTTCAGTCTTTCTCTTGATCTGAGATTTGCATCTCATAAAATC  
AGAATGGATAGACAGAAAATTTAATTAAGTTGTAATACATAGAGAAAGGGCTAAAAAAATAAAA

TAAGA

&gt;chr18\_44114402\_44114602

CACATCTTCTAACTTTGGAAAGGAGATAAGGCACTGAATGTTAGCTGAAAGATCCAGGAAAGTAT  
GGCCTTGGCAACATCCTGCTTCCCAGGGCATCCACCCTGAGTCCCTTTGCATTTCTCCTGATA  
CGTCTCCACTATCCAGCCAGGCCAGCTCCCATTGTCCCTTGACACACACGCCATGCTTATGCCTCA  
TGTCC

&gt;chr18\_45237402\_45237602

AAAGTGATTGGTTGGTTTGGCCCCCTCAGCCCGCCTCCCCCTCAAAGAGAGAAGAAGATCATCTTTG  
CTCCAGCCTGATCCTTTAATGTGCCTAAAAGCTGTTGCTTCTGTCTAAAGCAGACCCCAGGCCCT  
GAGCAGCGAATAGGTGGAGAGGTCTTAATGGGGATTAGTGTCTGCCAAGCAATGCCAGAACGGG  
GTCCT

&gt;chr18\_49466802\_49467002

GCTCTCTCTGGATGCTGGAGGAACCTTCTGTGTGTGATAACCATTCTATGTGAACTTTGAAGTTAGG  
GAGGATAAGATGAAGAAAAGGAAGACTGGAAGTCTTAGATTATTTTTTCTGGGCCCGCCTATAT  
TGCTTTTTTATACCATCAACATATGACATTGTCAACCAAAGAAATt atgtcaagtttaagaagcc  
tctga

&gt;chr18\_49545602\_49545802

ATGCTAGTGGAACCCACGTACTGAGAAGGCTTCTGGTTTGCAAAGAAATCCTCAGCTTCAAG  
GCATTTCTCCAATTTATACACAGTACTTCTACAACCTCAGTTGTGAGGGTTCACCTCAGACTTG  
CCTCACAACATCAAATTTCTTTACCAAGTGAACCCACTCATAAGATATATTTGTTACACTCTCAA  
TCTAT

&gt;chr18\_60335820\_60336020

agttaaggagattatacatctgtacctgacacattgtaatagttcaataaatgtGGCTCTTCTT  
TTTACTCTATTGAGAAAATTGAGGCCATTGTCAAAAATCGTTTCCTTCAATTTCTCACCTTTCC  
TACTACACAGTGTCTAAAATCTGTCTTCTCCCTTTTTGGTTTAAGGTCAACTTTTCTACCTATG  
TTCTG

&gt;chr18\_61300220\_61300420

atgataaattttattatcagaataaaggacaatgatatgattatctcaagagatgcagaaaaagc  
gtttgaataaattcaacctgatttcatgataaaatttctcaataaattaggtacaggactgtatt  
ttaacataataaaagccatctatgaccaaccacagctaaaatcatatgcaattatgaaaattta  
aaact

&gt;chr18\_68280020\_68280220

ctgtcttactaaaaatccaaaatttagctgggcgtggtggcacacgcctgtattcccagctgct  
caggaggctgaggcaggagaattgcttgaaccaaggaggcagaggttgagtgagccgagatcgc  
gccactgcgctcctgcctggctacagagcaagactccgtctcaaattctgtgggattatatcccc  
tcaaa

&gt;chr18\_73757612\_73757812

TTGCATTTGACTTGTAATTCATTTCTAACTTTTGAAGAGCCTGGAATCAGCAGGAGATTGGACA  
CCAGAAGTAATAAGCAAATTCATCTTTAAGAAAAGTTTCTTGAAGCAGGAAAAACATTTTCAA  
CTCTCTTCCCCTTAGAGTCAAAAAGCTTCTGGTTGCTACTTGCTCTGTGCCTGCAAGGGCTGCTG  
GTGAC

&gt;chr22\_43847056\_43847256

ccaccacaccagttaatttttgtatttttaatagagactgggtttcacgatggtggccaggatg  
gtctcaatctcttgacctcgatccaccgcctcggcctctcaaatgctgcaattaccggtgt

gagccgctgcgccagcTGGTGGTAGCTTTAATTACTACTATTAATATCATCCAAAGAGGACTTC  
CGCTT

>chr20\_7064200\_7064400

TTAACATGTGGATGGATCTTTACACAAAATCAAATCATGATGGAAATGTGCTGCATGTTTATTAC  
TATCTCAACTCCCTCATTATTAAGGCAGTATAAAAATGACTCTTATTTACAAGTGTCTATAGAA  
AGCTTGTGGCTAAAATGTAAGTAGACTGAAAATGGGAATATATCTTAAAGACAATTCAGAGTCAG  
TTGAA

>chr21\_18541129\_18541329

ttgaacaatgagaacacatggacacaggaaggggaaaatcacactctggggactgtttgggggtgg  
ggggaggctggagggatggcattgggagatatacctaatactagatgatgagttagtggggtgcag  
cgcaccagcaaggcacatgtatacatatgtaactaacctgtacattgtgcacatgtaccctaaaa  
cttaa

>chr21\_24308329\_24308529

aggggtaaaaaaactttcctagtgattgtttgtctgggacagatttaattttcttcttagcttatg  
gggctctagtAAGTGTTTTCAATAATATAAGGAGCATAAATGAAAGAGCACATgcctaggttga  
atcctagcttaacacttatgactctggtaagtcattgtaatacacttgattcttttaaaatacatt  
atctg

>chr7\_13592075\_13592275

TTGGATGTTGCTCTATTTGTTACAGGACTATTAAAATGTATTTATTTTATCTTGAATGACAAGTA  
TAATTACAAAATTTAAAATGGAGTCTTTTTTAATAATAGGAATTTTGGACTATGATATTATAGTTG  
GAAAATTAACTTCACTCAGTATCagagataattttgtaaagcatttagtagagtgacctgacagt  
taata

>chr7\_14829475\_14829675

ttaagaaatggccaaaatgttttccagagtgtgaaaaaccattttgaattcccaccagcagagg  
atgactgatacagtgctctccacaccctttccagtagttgatgtcgttaccatttttgtttagct  
attctaatactgaataatgatatactcttttttggttttgattgcatttccctaatagggtaatgat  
gttta

>chr7\_35403475\_35403675

AATGGAAGGCCCTCCTTAACACCAAAGGAACAGAGGAGCTGAGTGGCATCAGAGGGTGCACATCT  
GATGTGAGCCTGGAAGTGAAGGGTAGAGCCTACTCACAAAGGCATTTAGGAAAGTTAAAATTTAA  
AGAAAAAAGCCATAGAGAGAAACGGTATTATTGTAGAGTCCACTATGACTACCCAATGAG  
GTAAG

>chr7\_48546054\_48546254

ATGACTTTGGTCTCTCTTTTGCATTTGCCCCAAGAGATGGCTTATAGAGTTAGCAGGAAATGCC  
ACAGGACTTGGGCATTTCTTTGCAAAGTGTGAGAAAAACGACTATTAAGAGAGTCAGTACATTGA  
CTGAGCTTAAAACAGATGAGTTTGTCTATGCAACTGTACTTCTAAGCAGAAATTTCTTCTAAGGGAA  
TGATT

>chr7\_49107054\_49107254

cataaataaccagcctcaggtatttctttacagtgatgcaaaacagactaagacatggttccg  
tgtgtttgtgtactcctgtatcaatacatactctgaaataagattttatggtaaattctgagat  
actgtaaggcaagattccaagggttttttctaaacacgggctattttattacttgttcttccata  
tatat

>chr7\_51482106\_51482306

ccaggctggtcttgaacgcctgacctatgatccaccgcctcggcctcccaaagtgtgggatt

acaggcatgagccaccgtgcccggcTGAGATTGACTTGTATGCTCAGAAGTGCATTTGCTTTTAA  
AAACTTGACATTCAGTATACTTAAATATCTAGGtttttttgtactttttgtgtgtgtgtgagaca  
gggcc

>chr7\_56495706\_56495906

ttgaacctgggaggtggaggttgacgtgagccgagatcaggctgctgcactcaggcagcctgggt  
gactgagtgagactccgtctcaaaaaaaaaaaaaaaaaGATGGCACCAACGGATGTCAGTCACAC  
AATATATATCTGCAGATTACTATAATCCAATACAAGGCAATGGGGTCTAATATCTGTTAACCcag  
ctgtc

>chr7\_63935965\_63936165

AAAGGAACTCTGTGGGTTTGAATTTGGAATAATATTTTTTCCATGTTGATGTTACAATTTGGA  
GAAATTTTTCTCTTATTCTATGTAAAATTTTTAGGGGGTGTAAAGTTCAGTCTACAGTGTTCATT  
CTTAGTCACCTAACTGTAGCCAACCTCCCTTGTCAATTTCTCTGGAAAATTTTGGGATCATGGCA  
GCTTT

>chr7\_67873064\_67873264

aattatataacaattatataaattgcatatataatataatattacatatattatgtaattta  
tattatataatattttatattatattattacatatataattatataatgtataacatata  
tataaatgtaattatataacaattatataaattatattatataattaatataataatataatta  
tatata

>chr7\_71227464\_71227664

tggacagcatcccacatgggtgggaaaacaggcactcactatgctttcactttcccctgtggca  
gaaactgcaggccaaggagttctcttggcactgagctgtgctgctttgggggtgtggtgacatga  
gtaaagtgaaattgttcttcttacccttttcagtgcactattttcagattttttgctccagtga  
ggtgc

>chr7\_88923864\_88924064

cttgttacttttttttaaaaaatgcttctctatacctgctgggtctcctcaatgcttcccttc  
tgttctgatcaattttctcctgtaattctttgataatttttctgtctctgttatttcttt  
tatcactcttaattcactgatataaaatttttagggccttagtttcatgtcttaattctttatac  
tattt

>chr7\_109307764\_109307964

aggagatgctgcggtggaggaGGTACAACACACctctccttactgcatgtgataagttccaagac  
ccccactggatgctgaaaccataattagtaaagaacccgattgtcataagttggaacacatttc  
tgttcacatcctccaccagaaatttaagaaggcttttccatcttaacttagcacttacttatac  
acaca

>chr7\_112938764\_112938964

acacagctgacaaacttcccactctcatgggctttacagtctaataaaaagacatagataataag  
caagataaataagtaaaaatagtaggtgatgataaaaagggctaaggagacaaggtacaaaa  
ggcaatggcaagtgttttagggggttggaatttagaggagtcactaggaaaggacttgtcaatgg  
gacaa

>chr7\_114977564\_114977764

agaattgtacatccccaaattgcaatagtgcaagggtgaaaagtcctgGTTTAGATAGAGACGT  
GCCAAATAACTCCCAGTTTGGGTGCTGCTTTCCTAGGAACAGAAGGAGCTAATAAGTTAATAGGT  
AAGGAAAGGCCACATAGAGATTTAGTTCCTAGCTTTAATGGCACAAGAGCTAGCTGGCGAGACC  
CATTT

>chr7\_118365764\_118365964

CCATAATGAACTTTGGACAAGTCAAGTGGGATTGATGAAAACCTTGCCCAGTTTGTTCAGAGTT  
CAGAATAGGTCGGTATAGCCAAGTCAAATCAATGGATGGCACAGTTTTCTAATGGTCTTGAAGT  
TTTTTAGGGGCAATGATTTTTTCACACAGACACTAAACAATTTTTTCAGGCAATTAATAATAGCCTC  
CATT

>chr7\_122441164\_122441364

AAGCACATTTAAACTAGAAATGCTATAAGCCAAAGCAATACTCAAAAATATGTACATATAGGGA  
GAGATAGAGACCAAACAGAATGTTCAACTGTAAGACTAACATAATCCACTAACCAAAATCAGAC  
AAAGACAGCACCAAAGCCAATGTACGTTATAAGAAATGCTGCAAAAATCCTAAACCTACTAATg  
tttat

>chr7\_126914764\_126914964

ACCTCAAACTACAGGAAGGGTCATGTTCAAGCCCAGAATCACAAAAACACAGGCTTCCCTTGG  
TTTGCATGGGGTCGCCTCTGTATGTTATGACAAAACATAACTCAGTCTGTTTTTATCTATGATA  
ATCCTACTTGAGAGGATGTGAGACCgcaactgaagaaagcacactggctttgggtgaaaggcagac  
ctggg

>chr7\_146105467\_146105667

ACAGAAGGGACTGCCTCAGAGACCTCTTAAATTCTTAAGGCAAATTTAAATCTTGGCAATTC  
CTCGAAGGTGAACAATAATgctctttgtagggacatggatgaagctggaaccatcattctca  
gcaactgtcgccaaggacaaaaaaccaaacactgcatgttctcactcataggtggcaattgaa  
aatga

>chr7\_153380867\_153381067

CTTGGTGTCAAATTAACCTTTATTTCAAAGGGCAAAGGAATGCAGTATTAGCCAAATGCAAGAAAG  
TCAAGTAATCCTGTAAACAAGCATGGAGTTATAGAACCTAGAAGCAGACATTCTGGTTCTGGAA  
AAGATATTTCAAAGTCTTATTTCCAGCCCCACATTTTACAGTTACGTGTCTTCAGGATTCACACC  
CAGGA

>chr6\_28026221\_28026421

TGGGTAATAGGATACTAATGTCATATTCATCTTCCAACCTTTTAAAAAGTTTCTCCTTACAAAT  
AGGAAAATGTTTTCTTATTAGCACTGGATATGGGAAAGATGTAGCTGCAAGGAGTCTTTCATT  
GATTTCCAAGTGTATCCTGCTGATTTAAGTCAAATGTTTCTCCTGCTTTCTACTTGGCATT  
CAGCC

>chr6\_70238479\_70238679

TCATTTTAGTATCACCAGACTATAATTTCTGTATTGGAGGTGGAGGAATCCCCTTTATTGCTTTTC  
CTCCAACATGAGATGTGAGGAAAAATTTCTAAGGACAATTACAATGAAATCTTCATAAAACATGA  
ATTCTTTTGGCCATGAGGATTTCCACACACATGCATGCATAACTGCCACAGGATGGATCACTG  
GCTGA

>chr6\_75272880\_75273080

AACAATAAAATAATGACTACAACAATTTTGATAGGTAAACCTATCAGTATGTTTTACAGCTTTTG  
GTTGATGGGGGAGGGAATCTAAATGTAGGGTAGAAGCTAAAATAGAAGACTGACAACTTCTCTA  
AGACAAATTAGAGCTATAAAATTTTTATGAAAGCAAAGCATAAGGGACCTGCTAAGAATCATGTT  
TATAT

>chr6\_85096081\_85096281

aaaaaggaataaaataatggcatttacagcaacttgggtggaattggagactgttattctaagt  
aagtaactcaggaatggaacccaacatcgatgttcttactcttaattgggagctaagctatg  
aggatgcaaaggcataaggataatacaatgaactttggggacttgggaagaaagaatgggaggtg  
ggtta

>chr6\_88577081\_88577281

TTATTCACCTTGATCATTATCCTGAGTGACTTTGTCCCTAAAGTGACTATCTTTTTAACACTCCC  
TGCCCTACCCACCAACTCATTCTCTCCCCTCTTCTCTCCCAGGTAATAGCACTAGAGTCC  
ACCCAAATTAGAAACCGCACAGATATCTCTAGTTCCCTGTGTCTCTCTTTCCACTCAGACAGCCTT  
TCCTG

>chr6\_92937879\_92938079

tctatTTTTAAaccagtaccatgctgTTTTGGtaactattgccttgtagtataacttgaagtcag  
gtaatgtgatgcttccagatttgttctTTTTgcttagtactgcttggcaatgaaggctctTTTT  
tttggctccatatgaatttttaggattTTTTcttagttctgtgaagaataatgatagtattttga  
tggga

>chr6\_94458479\_94458679

AAAGTGAGATTTATTATGCAAATATTAATAGAATAAAAGCCGATTATGGCATCAGAAAGAAAAA  
AAGTGGACTATCATTTTTGATAATAGATTGGTTTTAGCTTTTTCTCTGTCTTAAGTGTCTTCT  
TATCTTTGAGAATCTTTGTCTCCAGTTTGTCTCAGAAGAGACTGTCTGATTGATTGATTGATTAA  
TGGAT

>chr6\_98023479\_98023679

ATTTATAGTAATATACTTTGTGTGGATGTAAGATTTCTTTTGAGGCAATTTCTTGAAGTGAAGT  
ATTATTGTACATTATATCTTTTTATCACTCCAACATTATTTCAATATTTTATTGCTTTACTTCA  
ACTTGAAAATGTTTCAGTTTCCTGAATAGTATTCTGTCTAGCTTCAGAATGAAAGCCTGTTATTTT  
CTGAT

>chr6\_100666879\_100667079

CTGTTAGATGTCTTTCTGGTTTCAAACCATAAAATCCTACTGGATTTACGCTGTTGTATTTTA  
AAAAATGTTATGTCTTAAAGCTTTTCTACAATTTAAAAAAAAGTTGAATGTTTTCAACATTTATT  
TTATCAATTAATCTGTGCCTAGACTAAAATAATGTTATGTTTTAAGGCTTCTCTGCAATTA  
AAAAA

>chr6\_104456107\_104456307

ATTATTGTACTGTATAGACCTTAAATAAAGTTGAAACCCATTGAGTATAACATTCGAAGAAATGG  
CTTACAAAAACTAAAAACCAGAACAAATCTTGAAACATAGCTGTCCCAGTTGGCAATAAGTTAAT  
TGTGATTTGAGTGGTATTTGTTCCCTTAATATATTTGAGGGCAAGTGTACCAGGAGAGGTAT  
TCagt

>chr6\_109148907\_109149107

aaagtatTTTCAAatgatggtgggacaactggatatccacatttaagaaataaacctgacctc  
agataatacacaAAAattatTTtgagatgaattatagatataaacataaaggcaaaaactacgaa  
gtatgtacaagaaaacacaggaaaatatctttacatctttggagttggcaaaaattactcagac  
aggat

>chr6\_114050507\_114050707

tctcactctccagttctaattaattggtaaagctctttcttcagattattccagattatacccat  
ttctcactctgccactgccactttggcccacatctcccacactccataaatataagtcagatca  
cgtcactcttctgtatagaatcaaccaatgTTTccattgcacttagactaaaagccgaagtgcct  
acaat

>chr6\_115195107\_115195307

AAAACACTCTTTTTAAATATAAGGTTATCGTTCAATTTCTTAGAATAAATTATTTCTTCTACAT  
CCTAATATCTTTTTCTAGTAATTTAGTACAAATCTTAACATCATTGCGCAAGCTAGTGTAGAT  
CTGAGAAAATAGGGTCATAGTTGGACTTCTTTTAGAACATACTATTTTGAGAATAAATCCAAAA

GTGTC

>chr6\_120026101\_120026301

ACTTAACTCCAGGTAAGAGATAAAATGACATAACCAAGAATGCATATGGTTCTTGAGAACTTTTA  
TCATTCTCCTTTATTTCGCACTTCTTTTTTTCAGAGAAAACAAGATCGCAGACTTCAAGTTTTTTT  
CTCATAGCTCCTATGGAGCACTCTGCAGTCAGCCATTGTGTTTATATTAATGAGAAGGTAGAGGA  
AGACT

>chr6\_120993101\_120993301

TTAATGTTGTTTAAAGCACTGTAAATATGAGGAAGTACCAGTGTACTGGGATCTCAACAGAGAGA  
TTAAATTTAAATTATCTAGAAGATAAATTGTGTGAAAATCCTGGTTGAGAGAAGGAATGATTAAC  
CTTTGTTTAGTGAGGCCAGGCAGGTGGCTATGTGACattcctccatcaaattagaacaagaaat  
ggtct

>chr6\_121887701\_121887901

taatgggatggctgggtcaaattggtatttctagttctagatccctgaggaatccccacactgact  
tccacaatgggtgaactagtttacagtcccaccaacagtgtaaaagtgttcctatttctccacat  
cctctccagcacctgttgttcctgactttttaatgatcaccattctaactgggtgtgagatggta  
tctca

>chr6\_124011301\_124011501

tggaaactgaaaccagctataccatgtattaactctgtgaccttgggcgattttctcagtgactta  
gtttctcatctctaaaatacgttaagattttttgggttaaatttggttaacatatgaagaacaat  
gccaggcactaagcaagtactcaaaaaataattgctattattATTTCTCTTGATATTCTTACC  
CTCAA

>chr6\_141492307\_141492507

ttattgccagtgaacatggctctcagtggaaggggagttgaaaaggggacagctaggggaaggta  
atctttccctggagtcggccatccctggcaggactcctctcccaaacttcaccatcaagctgtc  
cctctgaagtcaagctgcttctctcttacgtccaaccatagtctctgatgtcaggctgcttctcc  
tctct

>chr6\_154244507\_154244707

caaatcagaagcgttttaggctctttttcatcaaatataaaaaccagcccagttcatggctcctt  
tggcagcaaccctgagacgctttacagccctagaccctaaaagggtcaaaaggccgtcttattctc  
aaaatacattttattaccaatctgctcccagacattaaataaaaactccaaaaattggaatctggc  
cctca

>chr6\_165492210\_165492410

tatttctaataaaaaatataaaaGCTAAACTCCTTTtgaggcttctcaagtcatttggactgt  
gagccaattaaatatctttcctttgtaatttatccagtcctcggtcagctctttatagcagtatga  
gaacagggttaataAAgagaggacggaggtgagaataaatctttcttattaaattggaactgaagg  
tatca

>chr5\_4801200\_4801400

ATTACACTTTCTGCTCAATCTCCTTCACAGGTGTCTTTATCTCTGCCCAAGTGTAATAATTGAGTT  
GTGTCTGAGGCTGTCTATTCCACAGGTTTCTGGGCAAAGTCCATCCATGGCTTTGACGACCATC  
CAAATGCTGAGCGCCAGACACATCTCTGCTTCTTGCTTACAGAACAAGACACCTGTACGCctga  
tatgg

>chr5\_9579200\_9579400

aatggaaatgcttgatttgaacatgggttaggtgagctttggagCACTACAAATGCTGTCTATAT  
TTTGAATAACCATCAGCTGAGCTGCCTAATTCAGCCAGTAAGCATTTCTTAGGTGACAGGAGTT

ATATATGAACTGGTACCTTTCTTCCTACAAAATTTGATACATTTAGCAAATGTTTAGAGACCAGC  
AAAAT

>chr5\_18201643\_18201843

gtcctaagaattaccagcatacatttttgtttgcatttattaatcaagtaatttcatacgtatcc  
ctgccaataactataagttgtcaaaatttggcacaggggttcaaaaattataaaccagcccaag  
acagaatgatctttgcttgtgtaatctttaataacattgatattggtttaatgaaaatagctaca  
ccctg

>chr5\_25581443\_25581643

agaatatgcaagacagggtaacttataaagaaaataagtgtatatggatcacaattatggaggtt  
gggaagtccaagattgggcagcccatctgctgatgttctcactgtgtttaactcatagtgaag  
cataaggaaggaaatgggcatctgcaagaatccaagcaagagaaggagcaaccggcttgtgaac  
tcaact

>chr5\_27448443\_27448643

tatgtggactagagcattagggaccagccatactactgggtccagatggcatcacgatgctgta  
gccctctgggtgattatggaggtatatcagtggggctccagggatgtggagatgcaggcactgtt  
gggccccacggcaggatgtagtcttgtgagaactggactctcaaattggcagctgcttgggtcttg  
gggt

>chr5\_33297243\_33297443

aggaaccctcataggggctgtgagtaccaccccaacaactagcatgaaaataaaggaaaatct  
tgagttccctcaagggttaattccaggcacctagctatccttaagaagtaataaacaacttgata  
agtgggaaggtaatagtagcttaaaacaatagccaaggagttagaatcaccagaatgtttggttc  
cctgt

>chr5\_34372443\_34372643

aaatagatataaattcaaaaaaatttggagtagtacttgaagtgtgataaaaaaaaaaaaaacacagcc  
aggatagcataatcaaaccaatgaaaactaaaaaaaagaaaatttgaagccagctagagaaaa  
ttaagatatggtatagattgatggtaagaataattgctgaattctcacagaaacaatggaacca  
gaaga

>chr5\_39748443\_39748643

aggtgatttagaaagctaccatacatgcacagagaaaagcaaaggccattaagagatctgagaa  
gaggctaggtgcagtggtcatgcctataatcctcgcaccttggcaggccaaggtgggaagattg  
cttaaggccaagaatgcaagaccagcttgggcagcagagtgagaaccagttactaaaaaaattaa  
aagaa

>chr5\_49565443\_49565643

atctaaaagatttttgttttaagtaaaaatagtaacaacacattGGGTATTTCTGGCATATGGAA  
Aacataccagaatctctgggacacattcaaagcagtggtgtagaggaaaatttatagcactaaatg  
cccataagagaaaaggaggaaagatctaaaattgacactctaactcacaataaaaagaactacag  
gagca

>chr5\_57844043\_57844243

TATTGCTAAAAGGGCTGTGTAAGTCAGATAAATGCCAAACTCGTAATTCACCCAGACACAGCTTT  
TATACCGGCTAGGTCAATCCAATTATCTCAGAGCAGGGACAATGGGGAAAGTGCATCAGGATGTA  
TTAGGCAGCTTCCACTAGCAAAAATGAGGTTAAAAAATATGGAAACTTCCCACTACCACCTATAG  
GGTGA

>chr5\_62867244\_62867444

aaaaagcatttgctagactgtttttattttaattctagagggaaaacgttagtattttatttgta



gtatttattttatgtataccttatataattattaatatagatgatttacacttattatcttacta  
tttgattttatttggaccttgtgatttatgccacctttccctttcttttttgccttcattttaat  
taatC

>chr5\_65637244\_65637444

ccaaccagcaaccttcacctagcaacctccatttaacccaaaacaaagggcctcaattccttata  
cagcttgtattccaagggataggccaggggttcagatgtcctttatacataaggagtgagtcctt  
acattggccactcctgaattccttagcttgagactctgaacacatattcttcttagaccataggg  
tcact

>chr5\_81189044\_81189244

GCAGCCCCTGGTCTTTTCAGTTTAACTATTTTCACACAGATTTTCCAAGTGCCTTTATTTTCTCAA  
GTCTGTTATTCTCCTCTAAAATTCAGAAATGTGTAACCTTCTATTTATTTTGTAGCCCCTTTTCTA  
CTATATATGCATCATTTTGAATTTTATTCCATTCTTAATACTAGGGGTTCTCAAGAATTTTCCA  
ACCCA

>chr5\_81346444\_81346644

ATAATAGATGATATAATCCTTTGAAGGTGGTATAATCCTCTGTCCACTGCTGATTGATAGAGAC  
TATTTCAAGTCAAAATCCTACAAATCTTggctgggtgtgggtgcttacacctgtaatcccaaca  
ctttgggaagttgagggcaggaggattgtttgagggccaggagtttgagaccagcctaggcaacata  
gcaag

>chr5\_84749644\_84749844

tgtggaaattccagatgaacaactcaacactttaaaaaatgcatctaaaaatgagggctcccaga  
tcaggcccatccagggatgcctattcatgtgcagaaacttctaaaaatttttcaaaaaactgtta  
ttttctctttttaaaagactctttacaagaacagatgaaaagcttaagcaactaattgataaga  
aaaat

>chr5\_103592501\_103592701

cctctgactagataattttgaatgatctgtctttaaatttgctgattctttcttctgcttaatta  
agagtttttagctcatttattgaattcttcagctccgaatttctatatggttcttttttataatt  
tatactctctttgttgaatctctcctttgttcatatatcgttatctcgatttctttttggttgcc  
ttttg

>chr5\_105873701\_105873901

acactaggtcttatttcttctatataactctatagttgtTTTAATACACCTTTTAAACTCtt  
ctattgagttaacagtgatttatactctacttttaagtagtagaatattctgaatttgactaca  
taattacctcgatcagtgagttttacacttccaaatattttatattgttacttatccatttggt  
tcaac

>chr5\_155714622\_155714822

ttagttccGTTTCTTtgtgtgtgtgtgtgtgtgtgtgtgtgtgtgtgtgtgtgtgtgtgtatgtgtgtatgGGTA  
CATGCACACTTGCATGTATATATATTCATCGATACACATACTCTTTGCTGACATTGTTTTAAAGC  
TTAGAGATAGgctgggcatgggtgtctctcacctgtaatcccagccctttgtgaggcctaagctggg  
aggat

>chr4\_11658102\_11658302

atgggatattggcattgagaggggtaaggggtgattaggttttaatgagatggtaaggggtgcatg  
atcggtcgctaaggagggagtagaggtgtcttaggtggggagatacaaggggaggatgtgaagga  
ggctttgaactgggggaaaaggcagcaataaggtgtggctgtagcccaggaatagtcaggggaagc  
agatg

>chr4\_12464102\_12464302

caaaactactccgagctaaaggaggaagttcaaaccaatggcaaagaagttaaaaactttgaaaa  
aaaattagacaaatagataactagaataaccaatgcagagaaggccttaaaggacgtgatggagc  
tgaaaaccacggcagcagagaactatgtgatgaatgcacaagcctcagcaaccgatgtgatcaactg  
gaaga

>chr4\_14644102\_14644302

attcatgtggacggcaaacatatgaaaagatggtcaagttcacttataaacaggggaacaacaagg  
tattaccttatatgcccatctgctggcaagagttaaaaagggcaaacactgattgctggcaatg  
atgggggatgtggctcgcatatatcactggtagaaatggtgcctattataaccattttggaatcaa  
aaagg

>chr4\_20313102\_20313302

AGTAGATGGTAATTCTGATTTTTATTTAATATAGATTGTTATGGAAATCTTTATAAAAATTTTGCT  
ACAAAAATGTTTACATATGTGACCTTACTGGAAGTGAATAGTACTACTTTGGTTTAAAAGTTTGT  
TCTTAAGAATAAGAACATTTTAGAGTTATAGAAAATAGTCCAGTCAATGATAATAGCTGTGTGTA  
ACTAT

>chr4\_28327302\_28327502

GTACCCAGCTTATATTATATGTTAAACAATTGTTTGTGAATTCAATAAACTGACATAGATTACA  
TTGGAAATTCAGATTTATTGATACCTTAATGCTATACTAAATGTGACTAGTCTTTAGTCTTTTC  
TCCTTGGGAAAGAGAAATCTACTACTTCCACCTAGTATGCTACCTTTCCTATGAAAAAGGATTAG  
CTTAT

>chr4\_28417702\_28417902

tgaacctctgacctcaaatgatcagcctgcctcggcctcccaatatgctgggattacatgggatt  
acaagagtgagccaccgctccagccCATACTGAGTTTTtgctaagagggtgatgggtgcaaac  
tttagaaggaagagggttgccaacagaaaagatcaaaactcatgaataaaatgggaattttca  
cctcc

>chr4\_31410302\_31410502

ATGTACATTGTGTacacacgcacacacacacacacacagagacaccctacacacacCATATCAT  
TAAACTTAAGAGTTGGTAGTTCATTAACTCAACAAGCAACTCAAGGACATATTGGTCATCCATCT  
ATACCAGAAATCCTTTCAAGTCCTAGAAATAGATAGGATTAAATTATATTCCTACTCTGCAGTG  
ACTGC

>chr4\_32448102\_32448302

TTTAGACCCCCACATTTTGTGACTCTAATCATCTCCATCTTTCCAGAACTGTGACCATATTAA  
AATGTTGAGACCGTCGGCTTTGTTTGTGTTGGAAACTTATGGAAACAGGAAAATAAAGTAGATGA  
CTTTGCAGAGTGTTTTGTATTTTAAAGATGCACGTGTCACAATGTATTCATATTTGAAAGAGT  
AACAG

>chr4\_65697205\_65697405

gaggaaattgaatctcaggggaagtgaacttattttttttttaagattttatgggtgtcagagcaa  
agattagagtctagatttttctgaGTATATCTTGTGTTACAGTGACCCTGTTAACAGAGTGAATT  
GACAACATTATTTCCACTGGCAGCAGTGCCCTGGAGTAGCTGCTATTTCTCCATATTTATCTGCAG  
GCAGT

>chr4\_68078805\_68079005

TCACACAATCTGACAGTGACTTTTCTGGGTtaagcttttggtatgtaaaccctgagacctagat  
gctgtttgttccacaatataacctagcctatcttgaccaatataCTCCTGAGTAACAATATCTG  
TTATTGAGCACTCTCAAGAGCACTGTTTTTCATGTATTAATTCCTTATTCACCTCAGAACTCTGGATC  
CCAGT



TACCC

>chr4\_139545950\_139546150

cctaaggattgtggcctccaggcgcggtgtaagtgatattgtatgcctaatgcctgggatactcc  
ctgggttactgtcgccttgaaagcggggccattgtcactctgtaagcctcgggaagtctgaatct  
gggaattatttcatgaactagtagtattctttattatctctcgggccttttctttcctgcagtggaagg  
cctct

>chr4\_155293950\_155294150

AAAATAGAGTATTTTCAGAAGTAATATCAGTAGAGTAGAAGTGACTCAGTTGAAAAAATATTGACA  
GTCTTCACAAGGATAAATAGAGCAGTAGCAACGAACATCAATGTATTTTACAAGAAAAATTCCTTC  
TACTGGCAGATAAAAATCTCTTAGTAACCACCAGCAAATGGGTTCTCAGCAATTTTCTTCTAAAG  
GGCTT

>chr4\_166689150\_166689350

TTTTGCCTTTAATCACTTATATTTTTTAATTTGCCTTACATTTTAAAATttgatgtatatgtctc  
tgcaaactgtcaactcctggaagacagagacagtgtcatgcttctttCAGAACCTATAAATAACA  
AAAAACACAAGAGAATTAAATAAATATTTGATAAATTACATTCAAcactggactgtaatcttcat  
gaagg

>chr4\_168339025\_168339225

gctgttattgatgtggcaagtcaaggcattctaagaaggaatgtccaggcagcaagacaaagcca  
ccttggccctgtccagcctgtggcagaaaccactggagatggatctgcccctggaggcagagttc  
actgggtgaagaatcagctctcacaatgggtccagcaggactgacaggtcctggggctcaaacc  
tggt

>chr4\_168868825\_168869025

AGAATTGAGTTCCTGAAGCTGATAACACTGTAAACGTGTAGAGACTATGACTTTGAAGGAGTTCA  
TCAGGTTTACATTTCCAGCAATTGAAAGTATATGGATTTTACGTTGATGATAGAACAAGGCTTTA  
GAAATGTCACTGTGGTGTCTTGTCAATACTCAATACACAGTTGCCTCTACCTCCCTTTCCAGTG  
CCACA

>chr4\_171432825\_171433025

agatggaatctcgtctgtcaccaggtggagtgagtgatgatcttggctccctgcaagct  
tcacctcctgggttcacgccattctcatgcctcagcctcccagtagctgggactacaggtgcct  
gccaccatgccagctacaaaagttctgggatgataggcgtgaaccaccatgcccagtcATGATT  
TCTAT

>chr4\_171476425\_171476625

tctgtgttttagtgatTTTTGAAAagaatactgagctaagagttatccaaaatgtctaagaacaact  
gcccattgttttcatctagtgtacagggaaagttctctacctaataaacacatttgaagtaagcgt  
gggcaagaattaagctatTTTcttattacatctcataaAATACATGAGGTTTTTTTTTCTCTTT  
TAACT

>chr4\_178734006\_178734206

ATTTTGCTTAGCCTTTTCCCGAAGGATTCCCCACGCAGGGTTGTTCTGGGTTGGGGTCTGTCTT  
CCTGCAGCTGAAGTCAGACCTGAATTGCAGGGCAATGTGTGTCATTCTTTTCAAATTCAGAAGAT  
GAAATCAGTGAGTCTCTGTTCAATTTTAAGCAGGACAAACAATGAAACAAGAAGGATAA  
CCCAA

>chr4\_178762806\_178763006

TTTTCTCCCTGTCACAATGTGCTTTCTGGCTTATTTTGTGTTGGCTTTAAGTGAGACAAAAATATT  
CTTCTACTTATAAATAACATACTGGTGGCAGGTGATTGAACTCCAACCTAGACATATATTGCTGA

GAGAAATGAACAAAAGCACTTGTGGAAAGGAGAAAAGCAGAAATTAAGTTTACTATTTTATATGTTGCTT

>chr4\_179428206\_179428406

agaggctgaagtcaaggtggtggcagagccctgcctcctttaaggcatgaggggaaggacccttctttgcttctcttatcttctggtggttagctatcattggccttatttggcccatggcagcatgactccagtcctctgccactgtcttcaaataggccttttccttgtgtgtctatgtgtcttcacacaatctt

>chr4\_187888606\_187888806

GGCAGGCGACATGCGAGTGTCTGGAGAGGAACCCTGGACGCCACCATTTACATGGAAGAGGCAGGAGACATACGAGTGTCTGAGGAGGAACCCTGGACGCCACTATTTACATGGAAGAGGCAGGCGACATGCGAGTGTCTGGAGAGGAACCCCGACGCCACCATTTACATGAAGAGGCAGGCGACATGCGAGTGTCTGAG

>chr3\_7632400\_7632600

ccatgctgtgttcttctcaccactcgaagctcagcctacagacacatatcatggcttccttaactctcctctaccccagctaaaggagctccaccccagtcattgttctggttcttctattcctcagtaacttatgtcacttactggtttgttcacgtgtacctgtatctcctcattaaaatgaaagtaccttaaggt

>chr3\_20519596\_20519796

TATATATTTCTATATAAATATGATACTTTGAGATGGCAGTTTCTTTTATATTTTAGTTGAAAGTCGTATTTTGTAAATCACTGTGGTAAAAAAATTTGTGTATCTATTTTTTTCATCAAATTTTAGAACACTTTTTTCTTTAAAAATATAAATCTGAATTGATTTCTTTTTTTTGTTTTTCAGAGTATGTGAGGGCTGCTT

>chr3\_22658796\_22658996

taCAAGGTGCAACTAAAATTAATTTTATACTTAACATCCGACAGTCACTTTTCTAATTCCTTACTTAGGAAAGGGCTTTTATTTTAACTTTCTTATtcccttttttgcagtttgggaaaatagaagcccagagagaattaagttactcacccaaggttaccagctagacagtagtggtggcatttgaacctaaatcag

>chr3\_28148996\_28149196

AACTAACTTTACTGAGTTTCAAGCTCTGAAAGCTGGCAAACATTTTCTTCTATATATCCCTGAGAGGCTTCTGAGTCCATTCCCTGATTCTGATTAATCCATTGGTCCCGATATTATTTACTTGCCATGTATATCTATGGGTCTGTCTGGGTGCTCCATTAGTAGCAAGTTTCTTGAATCAGGTGAGCCCCAGGTGCC

>chr3\_34862196\_34862396

ttctacatgggttatccacagtttggtgaacttaagcataaaaatgaacaatttcccctagatcttcgaatcttcattctgaaggttgctgtgtgtacacattaaataaatttgtatgccttttctccaataatctgacttatgtgagttgatTTTTTcagcagaccttcagaggatgaagggaaactttccccttggcca

>chr3\_35075796\_35075996

AGCCATTTTGTGATGTAAGGACCCAGGAGACAGATAGAAAGTTGGGAGGCTATTTTTAGTCATTTCACTATTGATTTTACAAAATACTGAAAAGTGAAGCACAAATCCTTTAGCATTCCATAGTTAGGAAGGAGTGAAGTCATCCTAATACGTAAGGAAAGAGAGGAAAAGAGAGGGATAAGGGATACATATCTCTCTCTC

>chr3\_84734910\_84735110

taattcatatcatctagaatctattgtataaaataatacaataacaacaatgatataactaaaa

aaatgttacttttctcactatataactaagctacaagagtgaagatatacagatcagccacagtaag  
catttatttttaggaaaaggaagatgagacgcttctagtagtcaatgattcatagaaattctgaa  
actta

>chr3\_88850910\_88851110

gcgtttgaagattcaccacactgttttccacaatgggtgaactaatctacacatccctcaacagt  
gtataagtgtccctttttctccacaacctaaccagcatctgttattttttgactttttcataata  
gctattctgactggctctgtgatagtatctcattgtggttttgatttgcatttctcttaaatgaatg  
accag

>chr3\_104850710\_104850910

TTTTATCATTGGCTCATTATGGCACAATCTACATGAAATTCATCAATCAACAATTATATCATTAG  
ATACACTGAAACTACATACTATTTTTGAGATCTTTTccttttattcaccaaatgcctactacaca  
ttactaagtaatttatacactgtatctcataaaaccctcacaacactctgttaaaaagtatcatt  
aacc

>chr3\_135218110\_135218310

GACTTTTACAGAAGAATCATAGGTATAATACAATATAGGTTTCCATTTGATATAACCAATCTTCC  
CTAAAGAAATTCTGCACTAAATTTAAATAGTGAGcactataacataatataagcgcatagtctct  
ggagcttagttactaagggttcaaaccagattccatcaccacttccctaaccgtAACTTTCCTTAG  
CCTCA

>chr3\_137248910\_137249110

GGAATTAGAAGTGAGGAATTACAGAACAGTGGATGAGGTTGGGAAATCGGACTGCTGTCTTTCAG  
TGCCAATTGGCTGAATGTTCTGACGGTGGCCTCAATGATTATGACACCAGATCTGGCTGATAATC  
CCAGATGCACAGCCTAGCCCAGAAAGGTAGTGAAAGCTCTTCTCAAGGTGTGGGAGTGGAGAGA  
ATCTG

>chr3\_146292510\_146292710

CAATTGTCTTAGTTTTTCATTTGCCCTTAGTTGTTTTTTAATTTATTGCATAAGAAGAAAATGTTGA  
ATTTTATTTCTCTATTTTTATATCTAGATTTATATTTGTGTGTGGCCTAAAATCATATTTTAATT  
TTTCTTAATGGTCATATTAGATAACAATTTTTTCAGCTTCATGTTACAGTGTACCTGAACACTTG  
TGACT

>chr3\_147717110\_147717310

tcttatttatcttcttaattaagtttagttgatttccattttgtttttccctgtattccattat  
cttgacatcctgtaaagctgtttctattgactcttttttctcttggctttcattcatttgtttta  
tctcagagtatataatttagttttcattgagagtcagtcatttatatgaaacaccgtagtgctaa  
ttgaa

>chr3\_154537306\_154537506

ATTTCACTAATTTATGAGTCAATGTTTGTGCAGAGTTCTGAGTTCATAGCGTTAAAGTATATAGAA  
ATAATTACCATTAATTATAAAGCTTTGCAGTCCTCACTGTCAAGGCTATATTTACAGAAGCAGTC  
TTAACATCTCTCTGAAGAGCTATTAGCCAAACTGACTGAAGAGGAGCATCCTGACAGCACTATAA  
TTCAT

>chr3\_155376306\_155376506

GAAAGATGTGGACTTGACATTTTACTAAAATAATCAAAGCTGATCCATGTTTGCCCTGACGAAT  
AGAGTTTATCCCCACAAATTGGTGCTCTAAATTTCTTACCAAAAACCTAATTAATAACTGattt  
taaaaaaaagaatattccttaaaaaataaaatttacttttaaaaaagtttatttCTCTAGTCAA  
TCTCT

>chr3\_161616906\_161617106

tttttgtctctcacctttctctcttggacactccaattacatgtttagtagactgcctgaaatt  
gcctcacagctcactgttgttcttttcgttttactttctgtatttcttttttctatctatgttt  
tattttgaatactttctattgctttgtttttaggtaactaatcttcttatctgtagtgtctaatt  
ctgct

>chr3\_164110106\_164110306

agctagatgttggactgcacaaaaggacttcaaagaacctataataaatatgttgcaaatactaa  
aggaagctatatttaataattaatggataataactaaacagttattaatatagagaatatcatta  
aagagttaggaactattttaaaatggaaattctaagaagtaaaataaccaaagtaaaaaaaaaat  
tacta

>chr3\_173236506\_173236706

aaactggaacttatatttaagaggaagcagagtgtaaaactttgaaaaatgtgcagcccagcta  
cgtggtagaaaagaaaaatccattttcaggggagaaattcaagctggctgcagaaattcgcataa  
ctaaaaggaaggcaaatgcttacacaatgggggaaaggcctcgatggcatttcagtgaccttccac  
agcag

>chr3\_180763306\_180763506

ttccacttgatcgaatcggctactgaagcttgttcatgcatcatgtagttcttgtgccatggttt  
tcagctccatcaggccatttaaggtcttctctatgctgtttatttttagttagcccttcatctaatt  
cttttttcaaggtttttagcttcttcgagatggggttgaacattctccttcagctctgagaagtt  
tgтта

>chr2\_31696496\_31696696

ggtcgtggtggctggaagcgggtgatagctgaggaggtggttagcagagggatttgttgatgaat  
aagatacagggtacaggaGGAGCAATTCCTAACACAAaagctagagtggcctgggtccatgaacc  
tcttctcttctctctctacactcataccatagagatatcaccaatttcatggatttcaatgcc  
ataca

>chr2\_41857696\_41857896

tctgcaagcaggcaaattccaaagaagatccagaaggaccatctaagcatacttagatcttcttc  
taaaatttaacaatcagataggtcattcctcctcctcctgaaaggggcaagtgcaggaacaggagc  
cagggttttcttctactggaggtctggccatagtggggaggaTTTGGGAGAGTGTCTCTGCTGC  
CTTAA

>chr2\_59618096\_59618296

AAAAGAGCCTCTGTGAAGAATTCATGGTTCTGGTTTGCATGAGCACTGATGAAAAGAAGTGGA  
CTTTGTGGATAACTCTCTGGGCCTAATAGAAGAACTTATTCGGGGTAAAAATATAAAACAAGTAA  
AGTTAGTTGCCAAGCCCTCCATTATCCCTTTCTGATTCAATTCCTGACAGCTGTATGTCTTTC  
TCTGA

>chr2\_60068296\_60068496

TGGAATCCAGTCATCATTCAATTCTATAGGAAGAGTGGTCCCTAGAGTTGTACAATGCAAGTGT  
TGGTCAGGAATCCTTTGGAGAGTCTAAAGAAAGTCAATAAATCCCAGTGGAATTTACACAAAAA  
ACCTTTGCATTTAATGTGAGTTTTCAGAGATACAATAAAAACCCACCCACTAACCCCTTAAAGGC  
TCAGT

>chr2\_68195696\_68195896

atggaacatgcctttcaacagcatgttatatcctcctttgaccatataatggtttttatgttgga  
atcaattttcttagaaattaagattggccatctacctttcatggttatacattgcctggaataa  
ttttatccatccttttattttcaatcttctatgttgtttcattttgtgtgttccttgaaaacat  
caagt

>chr2\_83970489\_83970689

GTTTTCTATCTTTCTGTTCTTCCAGGTCATTTTTACCCCAATTCCTATTATTTTAATGCCTTTGT  
CCCTTCATGCACTCCATTGTAGCTTACTTCTACTATTCTCCAACCTCATTATTTTATCTTACC  
TTTTCCCTTCCTCCTTCTAAAAGGGCCTCTAAAAGTTAGGTTGATTAAATAAAATCATTAGA  
GTTAC

>chr2\_103893768\_103893968

tagaaggccatgtgcatgcacattgccattcatgcataggaagacctgagaaggccctaate  
tctcacttctagctaacttcgattctctgtacaagcaagatgtaaagactaacacagagttttaa  
accacccgcagaagcactaaaggcatgccccagcacacagaccacctcagcaaagattgggGAA  
TACTG

>chr2\_104757768\_104757968

CCAATAATtaaagagtttgatgttatttccatccttacagtatgacaaaaaggctaacaaaata  
aaaagcgactccccttagatccactggcgaactgaagtcataggacaaattgccaccttgaatgt  
tgaagagacaggtggatcatagcttactggcagagaaatcaatgccagggccagaaactggtagg  
aacac

>chr2\_118506730\_118506930

tctttgcctcctgtgtgtgtgtgtgatgggaatattttctttggtatgtccccagatactctgtg  
agatgtttcggttctcaaggacacctgttcctcggctgggcacatggccttggctcaccacctg  
gccttcagggttcaggcagtggaacatacactcctaagtaacctgggtgggagacctgtcacactac  
actgt

>chr2\_123730130\_123730330

TGCCTTAAAACAGTATGTGtatattattagaaatttaaaaatattttaaaGGTCAAAATGGAGA  
GTGATATAGAACATAGAAAAGAAAAATAATCCGGAACCTTCAGAAGTCTATAATCTATATCCTCAG  
TGAAAAATCAGATTAGAAGAAAAAAGAATTGCTAACTCTGCTCTTTGTGGGACAATGTGCCCT  
CTAAA

>chr2\_125106530\_125106730

AAGAATTCTTGTTAAATTGATGCCCTTCCCAGAGGTGTGTGTTCTTGCCAATTTTTGGCATCTTT  
AAAAAATGTTTGTGAACCTTAACTAGTAGAGATTGTGTAGAAGTGTGCTTTGATTGGACATGTCT  
GGCTTAAAATATagtcatgtcactcacaacggaaatacattctgagaaatgtgtcattaggcaat  
ttcat

>chr2\_125285330\_125285530

TAAAGCAAAAAGGAGGAAGGAATTACTTCTCTCCTAAACCATTTCAATTTTTCACTGCTGTGGGTG  
TCCTTTCTAACACAGGCAGATGAGCATTGGACCATCTGGGAAGTCTGCAGCAGAGGTTCCCGAAA  
TGCCCAATAACACACAACACTACTCCTGGGTTTGGCTGGTTTTTGCTCTTACTGCCCTACCACTGC  
TTCTC

>chr2\_125541130\_125541330

TATTATTCACAAGTCTTTCACAACATTTATTTCTACCAAACAAATAAGGAAATTATTTAATCTG  
TTAACCAAATTCAAGTTATCACTAAACTCTTTTCCAGTTTCTGAGGGGGTTTGGCATTTGGTTT  
GAGGTGTCAAAATTTGTAGTGAGGATTAATCAATGAAGCATGTAGAAGGTTTGATATTAATAA  
ATTCT

>chr2\_142190530\_142190730

tgtctttaggtagaagtgttaagttatctatgtgagacttctcttcttcttaaatattgtataggt  
atatacaactattctctctgagcactgcattagctgcataaattttgggtgtttatgttttcatt  
tcattcatctcaaagtattttctaactttacttgtgatatcttctctgatgcattggttattcagg



agtgt  
>chr2\_153841154\_153841354  
taacagataataaaatcatgaggtgagaaactggtgggaaactttataatggatggattaagctt  
agcaatacatgaattcagtcagaatctaaatatcacaagagaacaatcagccatTTTTTggt  
tcctgatacgatgctagggcaatacctaagataccctataaaaaactctatttctgaaaaattc  
aatct  
>chr2\_155575754\_155575954  
GCAACTAGGAAAGCCACTAGTATTTATTGAATTAACTACTCAACTGCAATAGCTTGACTTAACCT  
AAGCCATTGGCATGTGGTAAACTGGAAGAGAACATAGCCCTTTAAATTTCTGAAGTCTTCGGAG  
GTGAATCTTTGTTAATTCAGACTGTGCCGATCAATGTAGCCAAATGAAAATTAATGTGGGTAGAA  
AACAG  
>chr2\_184371155\_184371355  
AATATAAATAACAATACATGTAAAAATATCTAATATATTACCTGGATATGTTTTACTCTTGATG  
TTRACTCAGTTTCTCTGTGATGCAACAGGATGTGAATTCATTTATTGTGGATGGTACCAGGAGTA  
CTTTTTTttttttaatctgaggatgcatgtacttctttgcatttgaaaatttattacttattgca  
tcttc  
>chr2\_189016155\_189016355  
CCTATCAGCCTGCTTCTTGTCTTTTTTCTTGTAAGTGACTTGACTATTCTGAGTATCATGTGTC  
CATCCTCCCTTACATTCTACAGAAGGTATAAATGTTCTTTAAAAGTAAACATTCAGGAAAAGTC  
CTGGAGGAACTGATTGCTGGATCATTTCACTTACATTGAAAAAGTTTTACTACCTCTAACAAAAT  
AGCCA  
>chr2\_195757155\_195757355  
ctggtgatggacacagctgctttctaaacttatctggtgtgaacagtgctgcaccaaactggga  
gtgcagatacctatTTgatatactgatttcctttctttggggtatatacccagcagtgggattgc  
tggatcatatggcagctcaatTTTTtagttttatgaggaacctccaactgTTTTgtagtggct  
gtact  
>chr2\_196087155\_196087355  
ttgacatacagaaaaccgtacatatTTaatgtatacaacttgacgagtttggaataagaatata  
tccatgaaaccatcgctatagtctatgccataaacctatgtatcaactccaaaagtttcttctg  
ccctctttgtggtgtgtatgtgtgtgataagaacacttgacgtaaaatctacactcttagaaaat  
cttaa  
>chr2\_217811755\_217811955  
gcagatgaacttaaattttaatgatatgTTTTatTTaacttactataacaagaatattatgctat  
ttatatagaattattaatgagagatTTTtaccattTTTTtaggacaaactTTTTgaaatctagtata  
tTTTTtactgatagcacatttccatccagcccctctgtcatgctggtcacatttcaagggtc  
gatga  
>chr2\_221890756\_221890956  
TTTTTTTTTgagacggagtctcgctctgtcgcccaggtggagtgcagtgggcgggatctcggct  
cactgcaagctccgcctcccgggttcacgccatttctcctgcctcagcctcccaagtagctgggac  
tacaggcgcgccactacgcccagctaTTTTTTgtattTTTTtagtagagacggggttccaccgt  
tttag  
>chr2\_225287956\_225288156  
ttcccatcaaaattccaatgacattcttcacagaaatagaaaaacaaccctaaaatttctatga  
aactagaaaagaccatgaagattcaaaacaatactgagcaaaaaacaagctgaagacatcaca

ctatctgacttcaaaatatattaataatacaaaagctatagtaagcaatgcagcatggatcggtataaaa

>chr2\_225495356\_225495556

TCGCAAGGATCAATCAATCCTTCAACATAAAATTTACTGAGCAATtatttttaaaggtggagccaataacatttcctgactgattggatgtggtgtaacagagaaaagggccaagaatgcctccaatgtttttgacctgggcccactagatgtatggagttgccatccagtgagacaggggaatctgtggttaaggcagtttg

>chr2\_228809356\_228809556

ccatgttggccaggctgatccttgaactcctgacctcaagtgatttgcccaccttggcctcccaaa gtgctgggattacagggcgtgagccactgcgcccagccagaattgatttgaacttaaagcaaaagt atctgtttcaaaactacatttatttcgagttaaataaattcagtaattcttatgtcaactcaatat gatta

>chr1\_48071813\_48072013

gtcatattaataaatgtgaacaggctaaaatcacctattaaagaaaaagactgtcaggaagaa gaaattctaagcagtataaaagagacatattatacctaaagcaagccattcatatagatttaaa ataaatattttggcaaaggtctatccatcaaatgcagacacgaatagagagatcataattagaca aatag

>chr1\_72008412\_72008612

TTTAGCAATATGCCAGGGCAGGTGGTATCATAATGTCACTCCTATGATAACCTTTGCTCCTCATA ACTCCATGATGCAATGAGAGCAAGTGACTAAAGATTAAGAGCTCCACAAGCAATTTTTCTGATC CAACCAATTCTGGAGCACATTTAACTTTGGAAAAAATTGCCACTCTCAGACTGACCTGAACAAGT ACAAC

>chr1\_76472212\_76472412

TGTCCAAAAGCAATTCTCTAAAATCTGTATTGTGAAGACCTAACAGAACAAAATATCTATAAAG TGGAACTTTTTTTCATGATGAAGCCATGAGTAGGATATAAGTAAACATCTCCCTTTTTCTTGTA AAAGAGGATGCTGGTAATGTGCAAGCTAAGAGATTCATTGAGTTTTAACTAACTGTCCCTAGCA TTAGA

>chr1\_84860412\_84860612

TAATACTTCAAAAAGCTATTGGAAATAAATAAATAAAGCCAGCATCCTGACTCCCAGGAGTCCTC AAAGGACAACTGAACTTTGATGAAGCCAGTAGAGACCAGGTtcttgagaaacccaactttatctc aacctcaaaaatcctcacagaatgtgaactcatagccaaaaatcaaaagtacatacaatagcaa ggtat

>chr1\_95806412\_95806612

ctttgtcaggtgtaataagatattggataagaggggtcctacgggcaatggattcggagaatgtg atataaaciaaatttaagcatgtatctttacaaaggacttcttaagactttaataagctcatctg ctttgatcatattcagaaaaggatagatatgcaatatttctcacagttaattgaccTCAATGAGT GTCTC

>chr1\_96612612\_96612812

ACTGAGGAGTTTCTTGCTCACAAAACAATATGTTACTGCAATAAGAATCAATTTGTCTTTTCTCC CCACTGTTCTCTTtgtctgtgtgtgtgtgtgtgtgtgcacgtgtgtgtgtgtTTAgacagagctctt gctgtgtctccgggctgaaatgtagtggcacgaacttggctcattgcaaactccaccacttggga ctcaa

>chr1\_96843812\_96844012

caacaaatagcatgatgaatggaatgtagctcacatctcaataactaacactgaatgtaaatagc

ctaaatgttccattttaaacaatggaatggcaaaatgtataagaattcaccaaccaactatct  
gctgcattcaagagactcatctaacacataaggacgcaaataaacttaaggtaaaagagtggaaa  
aagac

>chr1\_106208477\_106208677

GTAAGTAAACTACAATTTTGAGGCTACTGTATCTGATATTTACACCGAAAAATAATAATGAACT  
CTCATTTGCTATAGCCAGAATTATCAACACACCTATCGAAGACTACTCAGACTTCCGTCATTGCC  
TAAATAAAATACTGGTTATTTTAGCTATCTCTTTTAATATTGGAACGAGAACAATCTTTATTCTT  
GCTTA

>chr1\_108279477\_108279677

ttaaagttcatatggaaacaaaaaagagcccgcattgccaagacaatcctaacaaaaagaacaa  
agctggaggcatcacgctagctgacttcaagctatcctacaaggctacagtaacaaaaacagcat  
ggactggtacaaaaacagagatatagaccaatggaacagaatagaggcctcagaaataacacca  
cacat

>chr1\_190751577\_190751777

ttaggctgcccctcctccctatgcagagaacttgaggctgaggaggattctcagctccacactta  
gtcacacctctgggtgcttggtggccactcgtctggattctccctcagtaactgggtgtttgtgctg  
ccattgtaggacctgtaggtgggcttgcattggtccttcctcatccatcttctcccactcagtg  
ctgag

>chr1\_195669177\_195669377

gggggtagagagttcatcttcttttttcatatatgtggttcatctaagtgtatagtaagtctta  
aataaagggttctcaataaaGGGTAAATGTATAAAATATTTATCAATGTATAAGTGGTACTATT  
TAAAGTAAGCCTAATTCCTTTGGGCTATCaaaatttataaaatatttatatttCTTTATACTTCA  
GTGGC

>chr1\_238781977\_238782177

TATACTCAAAGATCCACTGTTATTGGATACAGTCTATGAACTCACTCACTACAAAGGGTGACAAT  
GTTTACAGCAGGAAGAGTCTGGGTGACAGGAGTATGAATTCATCTGTGTGTTATCACATTGAGTGCT  
TATGCAGATTATCCACTTTTATCTCAGTTTATGCTGGATTTCTGAACCTGGCATATACTTCGGGA  
CTGAA

>chr9\_4331600\_4331800

CTGTACTTGAGCGACAGCGGTCAGTGGTAAATTCACCcaattacacaatgatgatagagtatgat  
gggttatgacgaagaaatgatgaaggcaggcactggtcacagacttgagtgtgagccaaagtt  
tcccaaagttcagaatgtctaaggtgagacctgaaggatgagcaggaataaccagatgaacatc  
tgggt

>chr9\_9815400\_9815600

aagctataaaaactaaaaggaaacgtagagaaaagtctccttgaaattgatctgggaaatgatttt  
ttagatgacaccgaaagcaaggtcaacaaaagcaaaaataaaccagtggtctatatcaaagtaa  
aaatcttctacacagcaaaaggaaacaataacaaaatgtaagaaatcctacagactgggaaaaT  
GCAAT

>chr9\_24437200\_24437400

tgtgatcacctcccaataaacaactCAAGGGTACCTTGGGGGAATCTAAAGTAAAACATAGAAA  
ATAGAATATAGAAATCAAGAAAGCATTTTAAAAAGGaaaataagataaaattaaattttatgtga  
caataatttaattCTCTCACTGGAAAGATGTTTCAAGATTGGATCAAATTTCACTGACTGGAAG  
AGACA

>chr9\_29623600\_29623800

TTTCATTATTCTAATATTGGTTAAGCCCCTACCTACTGCTCATTAGCTGTCTTCCTCAAGTCTAA  
GCTCCAACCATATCGAAACATTTATAGTTCCACTGGCCAGACTGTTTTAAACTAACAAGCCCATG  
TAGATGCTGGTGTGTCAGCCCTAACAGACCTACAGTTTGACAAATtggcaaacattgcttatacctcc  
aggtt

>chr9\_41562600\_41562800

accatgccgggcTGAAATTCATTAATTTTAACTGTAGAGCTTCTTGCTCACCCCTAGGAGTT  
AGAAACTTGAGAAGGCAAGCTCATCCAGAGTTGGACAAGTCCCAGCTTTAAATAGAGTCTCAGGG  
AATGAGGTCAAGTCTTTGCTGGGGGTCTTGTTAGATGATACACATGCAGGTCACTATTCTGAGTGG  
AGAGT

>chr9\_87963980\_87964180

GGGGGGCGCATAAGAAATACGATGTGCTGTATTTTTCTTTGCATGAGCTTAGTTTCCATTTTGAG  
TCCCCATTGTGGTGGCTATTGGAAAGGTAATCTGATTCAATTCAGGGCCAGCTTCTCCCTACCC  
CGGTAGGAGCAGGTACAGTCCATAAGGATGCGAGGGTGCAGGGAACGGTGTGTGGCTGCTGCCT  
GATGC

>chr9\_108706579\_108706779

gttaaaacatagatacatttggaaagagacatcttaattatattgtcttctaatacatgaacat  
ggtatacctctccatttatttagatctttgctaatttatctcagcaaaatgttctttttgtt  
ataggagtcttgtctcacttgttaaatttattcctaaagatattatatttatttcgtgctattat  
aatg

>chr9\_109549379\_109549579

GTAGCCATAATGTATCTACTCCTAACTAAATCGGGGTGTTAAGTCTTCTTAGAGCTATTTACTA  
attcatctatttcagaaacaaacacataggcttattctatatcaaacatcaggttggatactgc  
agcagcgacatagagcaatgaaacatattttttatcctccaggagctcattgttgggtgagggaa  
agaca

>chr9\_122311979\_122312179

CTTTCCCTCTGTCCCGACATTCATGGAGTTCCAAGCACCAAATTAGGGACATCTTCCAAATACAT  
TCCCAAATCAGCTTCCCTTTAAAGCAAAGCTACAAAAGACATGGCACTCTAAATGCCACCCCTT  
CCCATGCTGGTAAGCAGCTTATTTAGCCCAGCGTGTGGCCATCTTATGAACCCAGAGAAGAGAGG  
CTGCT

>chr8\_800200\_800400

tcttaacagtgtgtcaaaacagtgttttgaataatagaatattttaattttcataatgtccagtt  
tatcacatttttaaatgcattgtgcttttggagtttatctcaaagcaatttttgAACCTTCCAC  
CTGTTGCTACAAGTTAAAAGTTACGCTGCCTCTTGAAAGATTTCTGCACTTTGTGCAGAAATTTT  
ATTTC

>chr8\_1352593\_1352793

AGAGTCGTGTATTGAGTGCTTACTGAGCGCCACCTCCTCATCCTCCAGAGTCGTGTATTGAGTGC  
TACTGAGCGCTCCCTCCTCGTCCCTCCAGAGTCGTGTATTGAGTGTACTGAGCGCTCCCTCCT  
CGTCCCTCCAGAGTCGTGTATTGAGTGTACTGAGCGCTCCCTCCTCGTCCCTCCAGAGTCGTGTA  
TTGAG

>chr8\_15801229\_15801429

ggtactatcctagtgatagtgatagagaagatagaaagaaattatttaggcagatagtgagggca  
aaagagtccgcgcaaaacttcccttttaacaaaaagcagccctagaaatcattttttgtttcta  
acaaagagcagctggaaagatcaagctgcaaacgtagataaggaagctggaagcttgacagggg  
aatga

>chr8\_16647229\_16647429  
ggtgctggaacaattagatacctacatgcagagtaatgagcttcaacccttacctcacgccatac  
acaagagtaacttgaactatattgtatacttacaagtaagaactaaactataaaattct  
tagaagaaaacataggagtagtgatcttggattatgtaataattttacaaaagtaaacacaggaa  
ataaa

>chr8\_26960083\_26960283  
tccaacactttgaggggcccgaagcaggaggatcccaacttgtgcccgggagtttgagaccagcc  
tgggcaaaaataatgagactctgtctctacaaaaaatgtttaaaaatagcgtgccatggtggcga  
cacctgtagttccaagtacctgggaggctgaggtaggaggatcacctaaacctagaggtcaaagg  
ctgca

>chr8\_35892458\_35892658  
ctatagagctgtaaaataataggtttgtgttaagtcactaaatctacaataatTTTTTatagtg  
caataggaaaTAGAAATCCACTACTATGGTGAGTATCTCTTAATGATTGGTCTGTTTCTCAGGTT  
TGCTGGGATGAAAGAAAGCTCAAAAATCCATgattagaaaagctctgaggtccttttagctctga  
gatca

>chr8\_40427843\_40428043  
ctgtcaaaacctcaaatgtataactgaaatctgtgcatagcactgtatTCAACTGCAGCTTA  
ATCGGTTTATTTAAAAGTAACTTGTGGggccacgtgcagtggtcatgcctataattccagcact  
gtgggaggtcgagggcaggaggattgcttgagacaaggagtttgagaccagcccgggcccacacagc  
aaaac

>chr8\_49397247\_49397447  
gtgcactttctttcttaatatgcatttagattactgtctcatgttctttcattttaacctgaagg  
actccttttagtgtttcttgagggcaggcctgctagtgacaaattctctctgttttgttatc  
taagaatgccttaatttctccttccttcataaaggatagttttgctggatatagaatgcttaatt  
gacat

>chr8\_50925647\_50925847  
GGACAcatttaacacaggcccaggcactttattcaataaatatTTgttaaataaatcaatAAATA  
ACGGATTTGCAAATCTTTATACTGTAGTCTTGCTAGTGTTTAATCTTCATAGAAACAGTACTATT  
CTTTGAGTGACAGAGTGATAAAAAGTTTATTAAATGTGTAGAAGACTGCAAAGATTAAGAAGGAT  
ATCTT

>chr8\_75586645\_75586845  
TTTAAAGAGCTAGAGCACCATAATTATAATGCAAAAAAATAGGGAGAGGAATTTTACATAAAATT  
AAACATAATATTGAAAGACGTACATTTCTACTAACAAGTTGGATCCTAATCAGATGACTTCATTT  
TTCTTACCAAAAAATAAAGAATCATGAGAGAATTTGGCTAAGTTTGTCTTTACTCTTCCCTACTT  
TCTGT

>chr8\_84378845\_84379045  
tgggaactagaacaaaggtgagctcttgctatacttttacaagagactagtggtcttttgcccct  
gacctagagctctgtggaacttttaacttgagagagatgatttgagtatctggcagaggaaatt  
tctaagcagcaaagtgttcaacatgtgacctggctactcttaaaagtgttcagtcttataccttc  
acaaa

>chr8\_96600224\_96600424  
ctgctatgggcccacatttcttTTTTTTTTTTTTtaattattattatactttaagttctagggt  
acacgtgcacaacatgcaagtttgttatataggtatacatgtgccatggtggcttgctacaccta  
tcaaccatcatctacattaagtatttctcctaagtctatccctccccccagccccacaccccc

aacag  
>chr8\_98340224\_98340424  
tctatttcattctaaataggctgtaattctccttggtatttctcctttggccttggaatgtttag  
aattatgtcttcaggtgtctaaataaataaaaatttttgtcatatttttcttttttatttttagct  
taattatactatgattagagaatatgacctatgtgattaaaatcttttaaatgtggtgagccttg  
ccttg  
>chr8\_108220624\_108220824  
gacagtcttcagtagatacaaaaactgaagctggtgatcagcagcttcctcaggagatctcagga  
gctgggtgagtgagctcaagtatgtgcagtaagagtcaaaaatggaggagttcaaccaatatatga  
ccttcctctgggaatgcttgactgataagggaaaaatgcctcaagtgagcatgcacacaactaca  
gtaaa  
>chr8\_112881424\_112881624  
AAGATTTATTCTAGCTAAGAAATTGCATGGTTGGAGTTTTACTCTTCctaaaattataataatt  
tttttctaaattaaaataaGAATAGGACAATATTGAATGATACCTTAAAAGTTTTACATTTAGA  
AGGCTTTTGGAAAATGTGACTAACATGAACTGTAGGTATTATGAGACTCTTCTTGCACTGGAAGC  
CTAAT  
>chr8\_113885024\_113885224  
GAAAAAATAGACATATTAAGAGGTGAGATAGAATGATATAAAATTATTATGCACAATTTATATAGAA  
AGCCTAGCATTCTCAAGGTCATCCAGGAGGGAAGGAGTGTGGAAGAGAGATGAGAAGTAAGAACA  
GAAAGAATTAAGAAGATGATCTGACTAAGAAGATGATGTGTAGTGAAGAAGCCAGACAAAAACCT  
CAGAC  
>chr8\_117376419\_117376619  
TTTACATAAATATGTGTGCTAAAAAGGATGAAAGTGTATTTGATGGATCCTCACTCCTTGATGCA  
AAATTAAGTAGAAATTTgctgggcatggtggctcatgtctgcagtcccagaggtttagaaggc  
tgaggtgagagaatcatttgaggccaggagtttgagaccagcttaggcaatatagccagacccca  
tctct  
>chr8\_121163819\_121164019  
agtgagctgagatggtgccactgcactccagcctgcacaacagagcaagactccgtctcaaaaa  
aaaaaaaaaaaaaaaaGCAAAGTCAGTgtggttaggcagaataatgtacctgcaaagatattcacat  
ataatcttcagaactagtgaatatgttatatggcaaggggaattaagatgtcagattgaattgt  
ttggt  
>chr8\_122768419\_122768619  
CTTCATTCTCTAATAACAGAAATTTAGCTGAACTTTTTTGTCTTATGTTTGTAGTTTTAAAAAT  
TAACTTTTTGGTTCATCTGTAGTTCTCATTCTTCTTCTTATGGAAAttctttctttctttcttt  
ctttTATCAATACCCCAATAAAGGAACCAACCATCCTGAAACCTCAGTCTATATATTTCAATTA  
AGTAC  
>chr8\_131624618\_131624818  
tgtttctctggagaacctattacaagctccttgcccaggttgaggaggattataggagactt  
tctggaaggaggaaaaaccatataaaccacggttaccgaagtgaaggaaggagatttcagggga  
caagggagcattttacagtactacaattacagactggacaaatgggacgagtaataagaaagtgc  
acttg  
>chr8\_136379818\_136380018  
taattaccctagggcccgggtaccagaccactagagagcccctacactccagagcctgctgaaatt  
attcaaacagccaatcttaaacctggttaccttgcttcacttattccattccttctcacagaac

ctacaacaaaggcatttgtcccccaccttccccaccaccaacttctgaccaaccctgctgct  
tcct

>chr8\_142967693\_142967893

taaaagaacacacaatttgttccaagcaggataaatgtaaacaactcatgacaggacgtagctga  
atgaaactgcaggatgtcaaagagaaaaactggatctatgagaggaagaggtacaggcatatt  
tctaattgggtgacaaggtctgctgggagacaatacagcaataaattcaaattgatgagggaaaat  
catgt

>chrX\_1880400\_1880600

gtgctggggttacaggtgtggggtactgcaccagccAAtttctgtttttgtttttgttttt  
ttttgagatggagtcttgccctgtcgccaggctagagtgcagtggtgcatctcggctcactgca  
acccccgctcctgggtgcaagcgattctcctgcctcagcctcctgagtagctgggactacaggc  
ccctg

>chrX\_6309800\_6310000

GCCTCAGGAGCAGTGAGGGATTGCAAGAAGGGAAGCTACATAGAGAAACAATAATAGGATCCTC  
ATTGTCTTCTGTTCTCCTCCTTCCATACTCCTCTGTAACGAGTTCAACAAGAATCCGCATATCC  
TCAGAAGAGTAGCCTTCACATTTGTGAAGTGGAAGTCAAGTGCCTGGTGAAGCTAAAAATCCAAT  
GAAA

>chrX\_14204479\_14204679

gtagacagctcagtgaaattttacatgtatggatacccatgaacttaccctcagatcaagaata  
ttccagcatcccagaagattccttctgccccttcttagtactactcttcccctgccaagtaac  
cattattttaacttctatcaccataaactagtttgctgctagaacttgatgcaaatggaatc  
ataca

>chrX\_15312879\_15313079

TTGCTAGGGGTTTCTATATTTTTACTAAAAATATTTGGTAGGACTAGTTTGATTTGTGTTTTAC  
TAAGTTTCATCCTCACCTCAGTCTAGGAAGTTGTCTTCTTATGCGATTTCTATAAAATTTCTCT  
TAGttcacgtcaacaaacatttattgagcatctactaggtgctaagtgttttggaacaatgataa  
gaaa

>chrX\_22615479\_22615679

AATAGCAAGAATTGGGCCTCACTATGCAAATCTTGTAGAAACATATACAGTCTCAGAGAAAATTC  
AATATCTTTTGCCATTAATTGCTTCCAGTGACTTTTGGGAACATTAATAATGTGGCCCAGCAGGA  
ATGAGTATCCTGACAGAAAGTTCAGTTGGCTCACCATACAGGCGTTCTCTAATTAACATGTTTTAA  
TTAGA

>chrX\_29632279\_29632479

CTCATCTGGAGTAATTACATCCGCTGACAAATGCATATATAGTGCCAATGTCATACTTGCCTTGT  
TTTCTCAACCTTCCAATTCCTAGGCAAATTGTCAGATTCTCAAGGTAATAGCTGTCCCACATGAG  
ACTCTGGTATGTGCAGATCTTTATTGTGACAGTTCTTTTGGGGCTTCTGTGACCCAATGAAGTG  
AAAAT

>chrX\_36596679\_36596879

GGAGACATTAGGGAGAATCAATAGGTGTTACAGGGTGTCCACAAAGCACTTGGTGCTTAATTTA  
CTGCAAAGTGAATATTGACTGCAGAGCCAGAGGAGGATGGCGATATGTGGTTTTAGATTAGATTC  
AAACACTTTTTAGCCCTCAGAATACTATTAATCAGGCTAATattgagtaaataatttattaagcac  
ctact

>chrX\_44185056\_44185256

CTAGATAAGCCAATATAAATGTCATTTCTATTGCCACAATAGCTAACAATTGTAgcactgttcta





ctgtgtaatctagataatggctttccaatcttatttgtctttgcaaagaaacagtcaccttatt  
tcacaatcttttatatggatattttcagctcaattttatttaattcttttctaatttttagttatt  
tattttcttctgctagctttggggttgatttgtttctttttttccctagttccttttagttgcaa  
agtta

>chrX\_84707544\_84707744

ACTTCTTGGTTATTTTCAGTGGCAATGCAGGAAGAGGTTTCATCAGGTGGCCTGGGGCTATTTTTTC  
TGTTACGTGCCTTTAAATCTCCAGAGTGGGGAGGGAGGATCCAAGAGGGAAGAAAGTGAGGCTCT  
ATAGTCACAGCTGCCTTTAAGTGCTAAAGATTTTAGGAAGGGCAGTAGAAGGAATTTTACTGACC  
AGCAC

>chrX\_84999744\_84999944

accacctcacaccagtcaaaatggctattattaaaaagtcaaaaaataacagatgctgatgaggt  
tgcagagaaaaggaaatcttattcactgctggcagggatataaattagttcagccaaggtggaaa  
gcagtttggaattctcaaacaccttaaaacagaagtaccattaaactcagcaattccattgttg  
ggtat

>chrX\_85847544\_85847744

ttaccaatttcacaaactaattttctgggattttgattgggattgtgttgaatgtatacatcaag  
ttatgtagaactgatatcttaattatattaattgcttacatccatgaatgtagaatagcttgta  
tttatttaggtctacatggatttctgttattagagttttgtagtttttctcctatatatttctata  
aatac

>chrX\_92283344\_92283544

tgtccctgccttaactgatgacactgtcttgtgaaattccttctcctggctcatcctggctcaaa  
agctcccactactgagcaccttgtgacccccactctgcctgccagagaacaacccccctttgactg  
taattttcctttacctacccaaatcctataaaaccgccccactcccatctcccttactgactct  
tttctg

>chrX\_99094544\_99094744

tgttcacataaaaaacaaaaaccctagaactgccttacaaaaaatgctaaagggagttatttga  
attgaaatgaaaggacactaagtaaaaacataaaaaacatgaaagcataagactcactgataaagg  
taaataatataatcaaatttagtatatttcaatatcataatggtgatgcaaaatcactactacaaa  
agcta

>chrX\_101375344\_101375544

gcaatgacattcctcacagaattagaacaatctattttaaatttttatatgaaacaaaaaaggcc  
tgaatagccaaagcaatgctaagcaaaaaacaaagctgcaggtgtcatgttacctgatttcaaa  
ctatactacagggctacagtaacccaaatagcatgatattggtacaaaaacagacacatagtcca  
atgga

>chrX\_101421744\_101421944

gcacaaatgggtccagaacaagaggatccacttatcatatcaataactgcaccatccagaaggag  
ctgacctcacagaacacttctgaaggcaagataaagcaccaataaaagtaaacctgaaaaaat  
tgggtgccgttctccaggatgcagtgatatacattaaatcacagacctatacgtttaggctttagat  
ctaat

>chrX\_101557944\_101558144

GTGCTGTGCCTTTTACTGGTGATCTGTTTCATCTGTATGTAATGATAGAAACGGGGGCCAGGGCAG  
ATACCAGGTCTTGAAGTAGGCTTCCATCCTGTGACTTTGTATAGATACTTCTAAATCCAATTG  
AAATTCATAATAGGCTCTTTCATAAATATGTAGCCCCATTTTATATCCTCTATTTACATGTGTC  
CCATA

>chrX\_103242744\_103242944

TTGTAGAGAAATTATGGTTTTTTTTCCCTCTGATGTGCAGAGTTCTGTTTTGGAAAGTGTGCAC  
ATGCCCGCAGAGATCCTTTGGTTTCCAATAGTTTAAGACAAATTC AAGGCACCACCCAGAGGGAT  
TGA CTTGCAGTTGAATTGTGGTAGTTTCTCCTGGTCTGCTTAGGAAAAAAAAAAGTTTTCCAAG  
TCGTT

>chrX\_116311372\_116311572

ccatgggcagcaacttgtcacagttgctgggacttggggatataaggatggaagaagaagagggg  
atctctcacttttccacataccccaagtattttctaggaagagaagggaaacctgggactcctc  
gctcccctctttctagatgagtaggcattcatcttcagtctgtaccctttcaa atgcatcctga  
acccc

>chrX\_116368172\_116368372

tatatgttcattttattttatgtaaactgtaTGTATACACAATACACACAAACATATATACACAT  
ATATAAATAATGTCTTAACTTTTGCCTTTAAGAACTAAATAAAGTGCCTATTAATCTAATATTA  
TGCAATGTGTTGGGTTCCAAATACTGTAAGTGTATTTATTAGTACTAATTAGTAAGGGTGGCTCT  
ACTGT

>chrX\_143422514\_143422714

aagaagaaggctctctgccagtagagagggggcctgaatgggttggccttcatgaggttgggtt  
ctggggattttatggcttgggaagtggaagaaagacgcgtagtccatgggctgttttgagaaag  
catgatttagcttgggtccaggaccttggcccaggaccaattaggagatgaagtaatgattcatag  
gggct

>chrX\_151625944\_151626144

gccaggatggtctcagtcctgacttcgtgatccgcccgtctcggccttccaaagtgcagggat  
tacaggcgtgagccaccgcacccggccaacctgtgacctttcataagaaaaaagacatctttaa  
agtgtgaattttttaaaaactctatcaatacagaattttacatttatcaaaaatatcccttatt  
aataa

>chrX\_155099606\_155099806

tctctcgcccaggttgaggatgcatgcccgtgacacagcctcgggaagtcctaaggacatgtgcc  
caaggatgcagcttggttttatacatttttagggaggcatgaaacattaatcaagtacatttaaga  
aatacattggtttgggtccagaaacgcgggacaacacaaagaagcgggtgggggatccaggccaca  
ggtaa

>chr13\_19166600\_19166800

tctaggtatataaattttgaggtgtacagtCCATTTACCTAGGCTGTCTAACTTTGGGGTGTTC  
ATAGTATTTCTTCACATTTCTTCTGTCGTTAGAGACAAGTATAATTAATACGTATAAAATATGG  
TATTCTCCTATTTCCACAATGATCAAGAACAAATTTCTCAATTTTATGTTTTTATTATGTCCTCT  
CTCCC

>chr13\_23181800\_23182000

aggaactttaaatgcacattactaagtgaagaagccaatgtgaaaaggctacatattgtatgat  
tctactatatgacattgtgggaaagaccaaattatggagacagtaaaaaaatcagtggtttccaa  
gaatgaaggagagagaggggataaaaggggaagcacagaggatatttagggcagtgacgctattc  
tgc at

>chr13\_36758400\_36758600

aaagaaaaaatcacaagggatatgagaaaatattttgaaactgaatgatagtggaatatatacaa  
agttgatgagatgcagctgaagcaatgcttagagaaaaacttttataaaggaaaagtttagctt  
taagtgcttatattagaaaagaagaaaaggttaaaatcaatgatggaagtttctacctacaaga

ccttt  
>chr13\_48005599\_48005799  
ttattcatcactgattggaatataaattaattcatccattgtggaagcagAAAATCATCATGTT  
AAAATACCTAATAAGAGAATGGGTCTAAAAAATTATTTGCAGTAATTATTAATAATCATAAAGCCT  
ACGGTTTTTCATAATGAATGGATCAGGCTAGTATCACCTGAACCACctgatatggtttgatattt  
tgtgt  
>chr13\_53805799\_53805999  
GAAGTCCAAATTGTAAAGGGATCAGAATTAATAATGCTCTGTCACGGGTAACCCGAACACACAG  
GAGTTTAAGGAATTCACATCTTGGAGAAGAAACCTGGAATATTGCTGTTGAAAAGAGAAGTCTGG  
TCATCAGTTGGATTGATCTGTCTTATGAATAACTTCAAATTGACTACAAATAACCACAAAAATAG  
ATTTC  
>chr13\_54914199\_54914399  
GGGCTTTGCAAAGAAGTGGCCACAAATCTTAAGTGTGGTTCAAACACTAGCTTTTTTTTTTGTGTC  
TACTGTAATAGTAATTACCCATACTTAAGTCTCACAGAAGATTAAGGTAGAATCTTCCTTAGGAT  
ACTTCTTTTATTTTTTCTTAGACACAAGATTTTCTATGACAGAGGGAATTGTCAGTCCATTAATA  
TCTTC  
>chr13\_63898999\_63899199  
ATTTATTAACCTAATTCAAAATGGGAGTATATTTGGATAAGATGAACTTTGTCACTTCAAAATT  
AGAATCCTTGCATTATGTAATGATGAATATAGCCAGTTACAAAATCATAAACCTAAGTAAAATGG  
CAGATAACattaataaagaaaattataaaatttaaatGCAAAGACTAcagaattaccccctaatt  
ctgca  
>chr13\_67316599\_67316799  
gcaacaaaagctaaaattgacaaaatgggatctaattaactaaagagcttctgcacagcaaaaga  
aactaccatcagagtgaacaggtaacctacaacatgggagaaaattttcgcaacctactcatctg  
acaagggctaatatccagaatctacaatgaactcaacaaatttacaagaaaaaacaaacaac  
cccat  
>chr13\_69723399\_69723599  
TGACTTCTTGCTTTGCATATATATGACTTTTAGTTGGAGCTGGTATCTAAAATATGAACCTTATT  
TTCAACCTTTAATTCTTAAGAAATATTTGAATAATGACAGAAAGTGAGGTAAATGTTTACAAAAT  
AAAACCTTTTTTCTAGGAGAAAATAGAAAGCATAAAAAATGCAGTTAAAATTCTAAAGATGAggc  
caggc  
>chr13\_70773399\_70773599  
GCCATATTTCTATCAAAATTCAGTAGGGCTAAGTGCCTTGACTCAAAGCTTATTCTGTGGGCC  
CTTGAAAAGTAAAATTTACAATATGGTCTTTCAAATTTTTCCGTTAATGAAACCGCTGGACAATA  
TCTAGGATATACGCAATACGTATTAAATGCTTGATATCATAAATTATATTTTTGGGAAATGTACAA  
GTATG  
>chr13\_75485599\_75485799  
ctaacCCATGAATTCAGCTCCAATACAAGCCTGAGAGTAAACTAGATTGGATCCAAGTTTCCTT  
CAAAAGTTGCAAACACACATAGGGAGAATATGTTAACTCTTAAAGTAGAAGAAGAATGTGTGTTT  
TTGGGGAGCTCAGAGAGGTGTATGAACAAATAGGAATATTTAAGCTACCATGAGgacttctgctc  
tggac  
>chr13\_80000999\_80001199  
gtatataagaaagctctttattttctacctactaccctactgaatTTTTctattcttatcttgg  
atTTTctatgtactaatagtaataactaatagtcatagTTTTaaattctttccaatTTTgtacctc

aaatttatttctcttgtattatttatttttttcagtagctagagtacaataataattatagcgtg  
agagt

>chr13\_81955399\_81955599

TCAGATAACTATGTATGCAAATATTTTAATCTTCAGAGAAAACCTTGATTTTTCTAGAGTTTACAA  
CAACTAGTAAAGCTGGAGATGTTTCTGCCAGTTGGGTTTTATAATTCTTATTTAATTGAATGGAT  
GTTTAAAATATGTTACCTAGTTTAAAAACGCTTTTGATAATAATTCAAACCTAATACATTTAG  
TTAAA

>chr13\_82664599\_82664799

caagatcacaagcttttctcctaagtgtgttatgattgtgttttatatttacttctgtaacaca  
ttttgaattagtgatttatatgggtgtgaagagaagggtgactgctgcttctactacttcttctcc  
ctttccctccaccttccccctccccaccctttctttgtctttacaaaaaatatggatacaccttg  
tcct

>chr13\_85944599\_85944799

ttacataatatttttcaagtttattcatACTtattatgaataatgctactgagagcattagtgta  
cagttctcatgtgaatatggtgggtattcacatacccaaagaaaattaaattgatacaccatata  
gtaaaactaggtttaactttctaggaactatcaaactgttttctaacatagtcatttagtggtg  
gtaaa

>chr13\_87588399\_87588599

AAATACTATCTCAAATGTAATAATATTACCCTATGGAAATCCTTTTTAACTGCAAATATTCAGCA  
TTGAGTCAGAATTTATCGAAAACCTGCTATTTTCAGTTAGCATCCCATCATAAAAACCAATAGTCTGT  
TCCAAGTAAAGTAATTAGTAGAAAAATTTAAGGGGTCATTTATGAAAGAGTGGATGAGGTATAGA  
AGAAC

>chr13\_89381599\_89381799

AGCACAAGTGCTGACATATCCTAGGCTTGGAACAATGAGGTCCTCACTATCCTCCTTCTGCCCTT  
TCTTTTCATTCAGCCTGAGCAAGAGAGCTTACTGTCCCCCTTAGcctaaatctaggcccatcatct  
ctcttttcttgaacaaccgtcattgtaaattatttctcctatecctttgtgatataaatctttaa  
aaagt

>chr13\_94134999\_94135199

TGTTACAGGAAATTATAGACCCCAAATTGAGATGTATGAAACAAAGAGTTGTGTAGCAAGTACGT  
TTGTAATAATCAAATAGTATTTATTTTCATTTTACGCAATTTACCATATGGAGGTTTTCTAAATC  
TATTTAAGATGTCTTTGTTACGTGCATTTTTGAAACGTGCTTTGTGGTCTGTAAGTCTGCTTGCA  
TTTTA

>chr13\_105722199\_105722399

AGAGATTATTGGCTTCAGGTAATGAAATTTCTGTGGAGAAATTAGTACACCACATATTTTTGAAG  
ATATTTTACTAGCTATCTTTTTTTTTAAAAAGCAGTAGGCCAGGACCAAATAATGAATTTTCATC  
TTTTTTTAAAAAATAGATCTTTTCTATTTAAATCAATTCAGTGGATCTTTTCTATTTAAATCAAT  
TTCTA

>chr13\_107632999\_107633199

cactgtgggaggctgaggccggtagatcacctgaggtcaggagtttgagaccagctggaccaaca  
tggtgaaaccccgctctctattaaaaatacaaaaaaaattagccaggcgtgggtggcaggcacctgt  
aatccagctactcgggaggctgaggcaggagaatcgcttgaaactgggaagcagaggttgcaat  
gagct

>chr12\_16406733\_16406933

aaattgtgggtaacccttgtgcactggtgggtggaatgtaaaatggtgcagccattgtggaagc

agtaaaaagagttctcaaaaactttaagtagaattactactatatgattcagcaatcccacttc  
tgagtatatatccataagaattcaaagtgagattctgaggaaatatttacataccctcattcatc  
tcagc

>chr12\_20966733\_20966933

cacagtcacctaactgtatctcttctaggaatgatggattaatatttgcaaattcagtggtcc  
cagcaactttatggaacataattattgcaaacgtgagaatcaattgTACATATAACCTATATCA  
TACATATTATATAATCAGTATCCTATTACAAATCGGATGCTTATATAGATAACATTGatatttac  
atact

>chr12\_41820133\_41820333

TAGTAAGAATTTACTCACCTTTACATCCCATAGGTAGGACATGTCTGGTAAACTACACAAGGAAA  
CAATGACTGATTCAAGACCACCTCTACCCTGACTCTTCATTCATGGCATGCAGGACCAAAGATG  
CTATGCTAAATGAAGTGGGTCCCTCATGGGAAGAGTATATCTTATtgaaaaaggcatgatcttaga  
atcaa

>chr12\_69630733\_69630933

ttgaactcctgacctcaggcaatccacctgcctcagcctcccaaagtgctgagattataggcatg  
agccactgtgcccggccacatatatttaattggagtcaggaaggagagaagagagtgaggcag  
aaacaatatttgaagaggtaatggttgagaattttccagaactcatgaaacacattaatctatat  
attca

>chr12\_72841933\_72842133

TTTCTTGCTAATTCTGTTGACACAACCTAATGGATTaagttgtgactgcacaactctagaaggc  
tgccattcacatttggtgccatcatagatttggtgcatttattaagactgttttctggttgatggt  
attacagtgcccttgcgtaagaggtggctttttctaaattgtgtaatggcttcatttgggctagca  
ataag

>chr12\_72848533\_72848733

gcaggttctgagattcttcagctctaacaatcctcagatgatgccagtgctggttgattcatgaa  
ccacaccttgagtaacaaggCTAGAGTGTGATAGTTTTCTCCCTAAACACAGATTGTTCATGGT  
CCTGCACTACTTGAGTAAAAACCCATAAAGCTATACAATATCCTTCAAGATTTATTTGCTTCCAT  
CCTAA

>chr12\_73765133\_73765333

ATTCTGTTTCATGTTCCAAATGGCAGCTATTCTCCAGGGGATAAATATTTGAAAGATAGAGATGT  
AACAGCTTAAGTTTGTCCATCATTTTTCTCTCTTGGTCATTCATTTTTCAACTTGAGTTCAGGAG  
TTAAACAAAAAGAAGAAACAGAGAACTGATTTAATGACATCAGATTATTTCTTCAAGGGCTAT  
AATAT

>chr12\_75003133\_75003333

GCATAATAGCAATTCCTTATCTATTTCCATTTCTTCAAAATTTCTCCATATAGCACTTTACTT  
TCTGCCTCAATAGTTGCATCTTTTATTTACCTGTTTTCTTACTCCAATTTTATTTTGGCTCCTAG  
ATCTGTACTGAACTATTCTCTAAAGTagtgactctctaatttcgtgtgcataaaaaaacagga  
agccc

>chr12\_75408933\_75409133

acatccccattcaactcttccatttggcctgtacagaagatagatggatcttggacaatgacagt  
ggattattgtagcttaaccaggtgtgactccaattgctgctgctgtacctgatgtgattttgt  
ttcttgagcaattaacacatctcctggtacctagatgcagccattgacttgacaaatgccttt  
ttctc

>chr12\_83793869\_83794069

GTCTACAAATTACGTTTGGTAATGATGTTTAAActgtaagaaaataaagcagcaagactcag  
cactctgttgaaacacggaattagttttgggctttttgatggaaagtcagctgTAGTAATTTTAT  
GTGAAATGGAAGAAGGCTTAAAGAGAATATTGTATGCAAATATCCTTTATCATCTCCGGAGAATG  
GTTTC

>chr12\_85224269\_85224469

CCAAAAGCTTAAAGCTGTCAGATAAAATATATTGCATGTAAAAAGTGTAAAGACAATTCATATA  
TTTTTCTACTTTTTAAGATAACTTTTATTTGAAATATATTTCAACCTCACTATAATTTGTAG  
TTCAGAAGGTCAAATCTTTAGGACAGCTCCTCAGAAATCCAACTCTTTAGGAGTACTCATCAA  
AAGGT

>chr12\_98662469\_98662669

aactcaaatgtgaaaagaaggtgtagagtgagtggttttgggttttattttttgttttttt  
tttcagtttttctttgtttttattccctttttatgatctaaaataaattggtatctctttaaag  
taacttcttgatctataagatcttttcgtaagcctcacagtaaccacaatgaaaaaacctataa  
taaat

>chr12\_101088069\_101088269

TCTCTGTTCCCTTCCTTCCTCTTCGGCTCTTTCtttcttttctttcttttggttttgttttga  
gacagggctctttgttgcccaggctggagtgcaatgctgtgaacctggctcactgcaacgtcaatc  
tctgggctcaagcaattctcctgcctcagcccctcaagtagctgggactacaggcactacaggc  
acatg

>chr12\_126104847\_126105047

atatattcttgcttgggacaaagctgagtaggcaGAGCTGAATTGGCCTTTCCCAAAGTGTGTGA  
ATTTGAAGGACAGTGGCCAGTCATGCCTATGAAAGTTATAAATCTTCAGCAAGTGAGCCTCCTTC  
CACAAGTTAATGGAAGGATGGAGAGATCAGATGTTATAGATCACCCACAAAATATGCATATTATC  
ACTTC

>chr12\_127141447\_127141647

GATTCTAAGTGGCTGGTATTTCCAGAGAGAGGGGTTGCAATTATGGAGAGTGGGCAGATTGA  
GGTGGAGTAACATAAGGGGATTGGCCAGATGATGTGAAAGATGGGTTGTGGATTTCCCCCGTGTG  
GACCCAGCATCCTGAGCACCTAGAACATCAAGCGGGTGGAGCTCCGAGCCTGCGCAGGCAGCTG  
GGCAT

>chr12\_130030847\_130031047

ACAACTTTGATTCATTCCTGAAACCCTGTTGCTAAATGAAATGCTATTGAAAATACATGTCTGCG  
TGTGTATATTATTCATATTAATAGGAAAGATTATGATGGTTCCATTTCAAATAGGCAGCTCCCT  
AGACATTAGAAACCTAAGCTACACCTGCATTCTCCTTTAGAGCACGTATATTAACATTTGTCAAGC  
CCCAG

>chr11\_21638824\_21639024

AAACAAGGAAATGGAAGATGAAAAATTATGGTGGGATCAAAAATGAATTTAATACAGTAATAGTT  
TACTCTTCACTTGCATTAGATGGATAGcaaggttggtccaagctttctagcaagtagtggtcat  
aaagaacattattattcacatggctcacagtggccaaaatagaatatgaaccaggttaggccagt  
aaagc

>chr11\_24075624\_24075824

ATATTTATACGATTGAACATGTTCCAGAGATTTTACACTACTTCTAGCTGAAAATTATACAGAAT  
GGATCAATAAAGAAATATAATAAGGATCATCCTGATTATATAGATCATCCTGCTAGAAGTATATC  
ATTTAGCCCAGAGTATATTAAGATCTATATGGACAAGTAATAAAATCTTACTATTCTCAACTGGA  
AATCT

>chr11\_27827024\_27827224

gctttcagaaggaagtaaccctgccgacaccttgatttcagacttctggattccagaactaacag  
aaaagaaattcctggttgttttaagccatcaagtgtttgtactAGAACACTAATTAGAGGGGTAA  
TGAGATTTTGCTATTATTGCACTCCCTAAGTAGACAGGAGGCCAAAAACCGGGATAAAGGGATTC  
TAATC

>chr11\_31210824\_31211024

CTAAAATGTGTTAATTTACACATTTGGAAAAGTAGATAATGTCCCCTATAGTCTAACAAATGTAA  
CTTCTGCAACCATACTGCTATTGAACTAAACACTCCAATGTAAAGTTTAAACTACCATCCATCTG  
TGATCTCTGTTTTTTCATAATACCTTCTTATCTCAGGACTGAAACATCCACTatattagctcttct  
atggc

>chr11\_40455224\_40455424

ACATATATGTGTAGTTTTATAATATGTAAGTCGATGATATTTATCATGTTGCCACAGAGGATAT  
ATGTGTaaaaggaagtagtccaaggacttaaagtttgggaagatgaggtttatgaggatctactg  
gtgagaaaccagcagagcggaggtgtcctgcaaatgaggagaagaaagcatttaaagtaggaagga  
aggac

>chr11\_60199424\_60199624

CCCCTTCCAAGAAAAATCTTGGAGATTTTAAGAACTACCAGCACATTCCTGCAACCCACCTT  
ATGTTCCCATCCAAGAGAACACACTGGATTGCAGTAAGATGGAATCCAATCTTAATGATTATAAA  
CTGACTTGAAATCCCTTTGTTCATGAGATCAAAGCTGAGTCCACAATAGCTATAAAAAGAACATGG  
ATGAG

>chr11\_79581552\_79581752

agccataaaaaaggatgggttcatgtcctttgcagggacatagatgaagctggaaaccatcattc  
tcagcaaaactatcacaagaacacaaaaccgaacaccacatgttctcactcataagtggaggttga  
atgatgagaacacatggacacagggaggtgaacatcacacaccggggcctcttggcgggtggagg  
gctag

>chr11\_102809790\_102809990

GGTATATGTAACCATTTTAAACAAGTAAACAAAAATAAATAAACCTTTTTAGTTGCTAATTTT  
ACATATTTTTGGCGCAAGAGATGGGACACAGATAAGCACAAAAGATGGAACACAGATAAGGATGC  
TTGTGCAATGTCCTTTAATCCTGCATAAATTATGAAAAAGAGTGTCACTATCTTCACTTATAAA  
AAACT

>chr11\_103366590\_103366790

taggcacctcaccctgcagaatgtttcccttatctaattatgcttgcttagaagttccagg  
aactgaaacttcaacaatctggcaccaacagaattctcatccaccaggagattacctcaaggct  
gcagttaattaacctgattgtgcctgggatggcatcagctcattcatcaaatgagacaataatgc  
gtaag

>chr11\_105620790\_105620990

TTGTTGAATAATTATTTGTATGCTAAGCAACAATAGATGTCATAAGATTCAGCCAAGCAAATTT  
TTGATTCAGAGTGTTCCTTCAAAGCTATATTATAATACTATATATGGAATAACTGTATTTTAAAA  
TTTGAATCACTGGACCAAATAAAATACTGCCAAGGTATCATACTAACATAATAACATTGAATAT  
TTGCC

>chr11\_115987790\_115987990

ctctggactggaatggaaaaggggtggttcttcaaggaaacttgggatgctggtaccaaaagaaa  
gggaaatggatgctAttacaaaagaaagggaaatggatgctggggcaacaaaacaaataactac  
TTAGACTCCATGACCATTGGCTCCTCAATCTTTGAATCTGTCATTCTCTGTGCTAGCTTAACT

GTGGG  
>chr10\_1539800\_1540000  
TACACACACACAGGCACAAGCATCAGTTATGCTTTTTATACACTAATCCTAAATCTCTTCAATCT  
GAAATTATATTTTCATAAAGAAGCTTGTCTGAGGAAATAAAATTATATATAAATGTCACCTTCTATT  
TTCCAATCATTTATAAGTTAATTGAGGGGATCTCACATACATTCTGAGATATCTGCAGAAGTAA  
CCACT  
>chr10\_19170194\_19170394  
gagtcaagtttattttttttcagtcacgtttttatgctttgtatcctgtttaagaaagtcttcct  
taccacaggggtccccagaataactaacctatatgttttttaaaatggaaaaatctcctgtcacatt  
tacatctttaatctagaattgatttttttgtatgatgtgagatagagttcccatttctttttatt  
ttaat  
>chr10\_56437794\_56437994  
ACCAGGATGCTGAGGATATACTAGGTGGAAATTTTAGAACTGCTGTTGTTTCAGGATTTTCTCAA  
AGAGAAATATTCAGAAATATCAGGTAGTTACTTTACAAAGTAACatataataatataatgtatata  
cacacacacatatatttatatatGCACAAAGGGTTTCTTAAATGCACATGTACCTTTAAAGTAAG  
AATGC  
>chr10\_59869794\_59869994  
AAAAAGAATGGAGCAACATAGAGAAAGAGGCAGACACATTAAGATCCTGTGGTCCGAGAAAGTGA  
GAAAGCCACAGGGAGAGTAGCTGTCTTAGGTAAGTATGATGGCACAGCAATCCGCAGTCACAATTTG  
GTTGATATACCTCTAAGTACTTTGTCTCCATGTGGTTTCTGTAACCTTTTGTCAAACATCCTTTT  
GTCAA  
>chr10\_61174794\_61174994  
tcaagacaatccaggaaaaacatgaccttaccaaatgaactaaatagggcaccagggacaaagcc  
tggagaaacagagctatgtgacctttcagatatagaattcaaaatagctattttgagaaaactca  
aagaaattgaagataacacagagaataaattcaaaattctatcagattaatttaacacagagatt  
caaat  
>chr10\_67040794\_67040994  
tttaaaaattatttttaaaaaatgatttttataaaGTTATTCAGCTAAAAGACTCAGCATATTTT  
CATGTTTAACCTAAATCAAAACAAAGTGAATTCAGAAAACCAGATttttgttttgttttgtttt  
gttttgtttGTTGGttgagacagggctctcactgtgtcacctaggctggagcgcagtggtgacactt  
atagc  
>chr10\_67569994\_67570194  
CCACAATAAGAATATTTTTGTTGTACGGTTATTTCCCCCAAACGTATATTTGAATATTGGGAAGA  
AGAACACTGGAGGTGGGAAGAGTAGACAGGTATATTCTAACAAATATGCCCCAGATGATTTAGAA  
ATATCCATCATATATTTTCTCCACACATTGAGAAACAATAAAATAAGAGTAGAGAGGCATATAA  
AGAAG  
>chr10\_77607394\_77607594  
tacaattctataacaaaaagatgacctcattaaaaaatgggtgaaggacatgaatagaagttctc  
caaagaagatatacaaatggctaacaagcacatgaaaatatcacatgattcaacatcactaatca  
taaggggaaaatcaaagaaggtaccaataaatggaaagacatcctctaaaagattcatcactaat  
cataa  
>chr10\_82628420\_82628620  
cattacatattttgaatattactctgtatcctaaaatatatacaattattacacgtcaagtaagc  
acaaaaAATAAAAATTTTCTTGAACAAAACACTGCATAAATGTTCTTACAATTTTTGCTACTGCTT



GGTATTGTCTGATTatcagctcaaagtcagatttctcataatctaagtcaggccaggtgagtg  
gaggc  
>chr10\_83516420\_83516620  
gtattcacttaatttcattgataggttcttgggtattgggactcagagaaaaatccacaaaatga  
aggcctcagaagcaaaacttttttctcttagcttccccgctctcctgtctctcagtcccattg  
tcccttgaggctttaatatagaactaggatttctcttcccccaaggtaggtcatagaaaaccagaac  
ctctt  
>chr10\_89328620\_89328820  
cagaagctgatgccagcactgtctcctgtacagcctacagaactgtgagctaattaacgtcttt  
ttttttttaataaattaccagctctcaggtatttcttcatggcaacgtgagaactgcctaatag  
attgggtgacagagtgagaccctgtctcaaaaagaaaaaaaaaggagacagatagactccaataca  
ataat  
>chr10\_90436220\_90436420  
CAAAGCTGCCCTCAAAGTACTACACCCCTGTGTGTGAGAGACTTCCCAGGACTTACCACTACCCA  
TTGCCATTACACAGACCTGTCCCATATCCCAGATCCCCAGCACACTGTCCTCTCCTTTCTGAAGT  
ACTAATACCTGATATAATAAGCTAATAATTCTAACTGTTTCATGGAATTTCTGGTCTTCTTAAACA  
ATACC  
>chr10\_118292410\_118292610  
agggagaatgtggctgttaagatataaaaaggtggcaagaattctaaatctcagagaccaactg  
atgatcaagtaaatgcttcatgttctctgattgaatggtgaaagacatagtgaaaatggtaaatc  
aatAGAAATCTCTCTTAACCTCTGCCTACCCAAATCACTGTTTTCACTCATGTTCCCATTCTTA  
CGGTC  
>chr10\_119907210\_119907410  
GGGTTGGATCTGGGCAGGACAAGACCACATGAGTGGTGCCTGGGTATTCCAGAGTGACCACTGTT  
GTGCACCACACTTTCTGagcatttatttcactttaaggcaattacttgtttatttgctcttgagt  
tctcaaggacagggaccatgtttggcgggcttagcagtgatctccagggcctggcaggtccc  
tggca  
>chr10\_129314010\_129314210  
actatctcctctctaaaaagctaccttgaataaaacttccacaaatacaaaaagcacatatggtc  
aagcttattaattgtgctgccttttgcaatagcaggttaattagaatcaatcccaatgccatgaac  
aagagactagctgaataaatgacgacagagcctgcagccatgaaaaaacgtagtaggaagacctc  
tctgg  
>chr17\_11284075\_11284275  
atcaccagtcaggcagggctgcctcctctgaaggcttgactagggctggaggatctgcctccaa  
gacgcttactcacatgggtgctggatggttgcaagaagcttcagttcctccccgtgacattctct  
ccctgggtagctgagtgcttctcactgcatgggtgctggatttctcaggggtgggtaatcagagaa  
ggaga  
>chr16\_6837599\_6837799  
tctgttctccatccactgtgaccttgaggccaggttttgaagacacggttattacaagatgaaag  
agattgcatccctgagtgattCATGATCGTAGCATTCCATTGATTACTCTAAACCAAGCTGCAAA  
TGAGCACAGAGCTTCTGCTGGCTTAATCCCCAAAACCTGGAGTTGTAAAGGACTTAGTCTTCCTC  
CATAA  
>chr16\_32463099\_32463299  
AAAATTTTAATGTTTAAAATTTTCTTATGTGTACACATGTTAATTTATGTAATTTCAAACGGG

GTATCATACATGGAATTTGGTAGTTTCTTTCCCTTTTTTTGTTCACTTACTCTGTTTTTTAATGC  
TTTACTGTAAACCCACAATGCAGTGTCCCAATATTTATTATGTATAACTGATATTCACATAAAAC  
ATATT

>chr16\_55932099\_55932299

gcatgctacacattataacttcaattaaGTAAGCAATAGTGGGTAATTCTCTAGTTCATAC  
ATGTAAAATCACATGTAGATGCATCAAGAACTCTGAAACGTGGCCATGAGGTGTCTAGGgtggg  
tagatctgcaagataggagtttgagtgatttttatttttttcataattttctgcattgtttgaaa  
ctttg

>chr16\_60981099\_60981299

ACTAAGGCATCTGCCTACTTCTTAACTATAGGAGCCTTCTTTCAGTTCATTAAACAATATGCTT  
TAAGGAAAAAAAAAAGGAATCCATTGATACTCTTCTAACTGGATTACACTTGCTTCTTATTCAT  
CTCGTTATAACAATTATTCCCTTAAATTGGCATTTAATTATTCAGGGGCGCTTCTATAACCTCTAG  
ATAAG

>chr16\_87187699\_87187899

GGCATAGACCCTGAAGCTGGGGCAGAGGACAATGGATGCTTCCAGCATCATGGCTGCCCTCCCGT  
CCATGGCACAGAACACATTTCTCCTCAGAGGTGCTCCTGGTCTCATCCTCGGGTGGTAGCACTC  
ACAGCATTATAACCACGTCTCTCCAGCCATCCAGGGAAAACGCCAAAGATGTTACACGATATGGC  
AGTTT

>chr15\_54888908\_54889108

gtttgctgccctccccatggaaatgagtgatttattgctctattagttcacatcagagctggta  
agagcatgggacctcccttttcttttgcaatgtgacacagctacttccccctttgcttctaccat  
gaataaaaactcccagaggtctcaccagtagctgagcagctagtggtgccatgcttgtatagcct  
gcaga

>chr15\_91757196\_91757396

caccatttctctatgtgattcagtgatttgaatggatggttcaaacaccttttgaagtcagtgc  
agataccatcaaaggtagcatcttccactttgggaaacactTAACTTGAAATCAGTCATATGGG  
AACAAAATATCAGCTCATGACTACTGGGAAGTGGACCGGTTCCGGATCTCTAGAGGAGGGAGCTG  
GCATG

>chr15\_94688596\_94688796

TTGGCTTTCCTCCACAGAAAATTAGAAAATGCTTTCATGAAAAATCCAAGATAAATATGGAGTG  
CTGTCTCTGCTTCTCTCTCTCAGGGACCAGAGTTGTATAAGCCGACCTCTGTAAATTTATCTTC  
AATTAATTACAAGAGTTGTTCCATACATAGCTGTTAGTGAAAGTTTAGTCTTAGCCAAGCCAAT  
CCATA

>chr15\_94823796\_94823996

ttgtatgggtttttgtgtctcaatttgattcagttcaactccaacttttgttatttttcttctgc  
taacattgggtttgatttctcatttttccagttcctcctaagtgtgatgtagattgttaatttg  
agatctttctaacttcttgatgtaggcatttagcattacacactttcatcttaaactccaactgt  
gtccc

>chr15\_101307477\_101307677

gagggccagaaactggaaccagatgagctgtccccctccctccctcATCCTTGTCSSSSSAC  
TTCCGTcctcctttccctccctccctttctcctccctccctttctcctttctcctttctcctttct  
ccctccatctttctcctcctttctcctccctcctctcctccatctcccctcccGCCTGCCCCCA  
TTTAC

>chr14\_25979760\_25979960

aaaatatgcaaatgctgtatcttccaattagtttttcagtagaactgactgatatacaagaagat  
aaaaatttacaagatgaatttctcaaatatgaaattggtggtaggatttaaaaatgtgtcagga  
ttcagtaagcatatccaaaggggcttctgtcttgcctctgtgtatctttgtaaggtgtggaggt  
gtggt

>chr14\_33466649\_33466849

tccctcacccaagtctcatgttgcaagtcccacaattcccacgtattgtagaggtgattgaata  
atgggggtgggtctttcctgtgctgttcttgggatagtgaaatgggtctcatgagatctgatggtt  
ttaaaaacgggagtttctctgcacaagctctctcttttctgctgcatccatgtaagatgtgac  
tGGCg

>chr14\_72890247\_72890447

ggccattatcctaagcaaattaagcagagggcacaactcaatactatgtgttctcactataa  
gtgggagctaaacattgggtcctcatggacacgaagataatagtaactgacactgaagactacta  
gaggggttaggtgggagggggacgaggggtgaaaaacaaccagcaggtcctttgctcagtactt  
gagtg

>chr14\_84256047\_84256247

AAACATTTATAGTTTTTCTGAACCATAGAAAATTAGCACTCATATGATATAATGAGTATATTAAT  
GAATAAGAAAATGTAGACTCAGAGAAATCAAGTGAATTGCAGCAGATCCTCATGTATGAATCATC  
TGCTTTC AATCACTGCCCATTGCTTTTCACTGTACTGAAATaggttgggtcccaaggagagcaaa  
ctcgg

>chr14\_90254847\_90255047

agctactcaggaggctgaggcaggagaatcgcttgaaccaggaggcagaggttgcggtgagccg  
agatcgcgccactgcgctccagcctgggcaggagaagcaaaactccatgtcccagacaaaaaaaa  
aaaaaaaaagtgcgcaagtgggtgCTCTACACGGGTtttttgctaagtattccataacattattccg  
aaaag

>chr14\_94119247\_94119447

ggttctctccttctctattttctgaagttattgtaagttcggcgttattttttctgaagaatat  
ttTTGACCTAAAACCTTTGAACCAGCATTTCAGGGTAGATGTGGCACAATGAGGTAATAATTGGCA  
TAATTAGGTAAGCAGTACTTCTTACTCTTTATCTATTTACGTTCTTTGATTTTCTCTTTTTCTCT  
TCTGG

>chr14\_97231847\_97232047

agttcattgtagattctggatattagcccttctgtagatgagtagactgcaaaaattttctccca  
ttctgtgggttgccctgttactctgatggtagtttcttctgtgctgtggagaagctcttagtttaa  
ttagatcccatttgtcaattttggcttttctcaccattgccttgggtgttttagacatgaagtc  
ttgcc

>chr14\_105055155\_105055355

AGAGCTCAAGCACTCCGGGGCTCCGAGACAGCCTGAGCCCTGGCCCTGCTGCTTGGTGAATCAT  
GGGGGCCAAAAGGGGCTGCTGCCTGAGGGCTAACTAGGAAAAGGGGGACCCCGTGGCGTGAGATC  
GGACATGGGGGGCACAGCAGGCGGCCCGCCACACTAGTCAGCACAGCCCTCCTGTCTCCTGTGT  
TGGGT

>chr19\_56529388\_56529588

GACCCATTTTTACACAGTTCTTCCATCTTCTGTATTTCTGTGGTGTATATACACAATGGGTTAT  
TGAAGGCATTTTCAATTTGCGTCCCAAACGCAATCCACTTTTACATACAATCAATTTTTCATACAAT  
AACCAAGGCGATCTAAAAATTTACGCCTGTAACCTTGATTTCCCATGCTTAAAAATCCTTAAGTGGT  
TTTTA

>chr18\_48670602\_48670802

aagtttggaattattcctctttttctattctctctggaaaagttgtgtaacagtagtgaaagggttt  
ccctaaaagtaaaaacttaccactgaagctgtctggaagtgaagtgttctttgtggggaaggatt  
taataagaaatthaatctccttgatataatggactatthagatcttctattcttctgtgcagttt  
tgatt

>chr18\_49551002\_49551202

ggacatgtttttaagccacAGGTCTACAgaaaaatacaatgtgagccaagatccctaattatacc  
gaaaatcaagaaagtgtctcaaagattaatgtagatctgtaaaaaagacaaaagaacgtgtttaag  
catgctcctattgatcaaattcaggtcaatthaagcatcatagtgataatcagtataatcaatt  
gtaac

>chr18\_53275202\_53275402

CAAATGTGCTTTGCCCTGCTAATGCTGATAAAAACTACAAATCTGTCTCCTTCACTGTTGATCTA  
CAAATGGAAGCTGCGTGCCACATGCTTCGTCTCACTGTAACCTTAATGGAAAAGCAGCAGGGCTG  
TTAGCAGAATTTCTAGACCACAAAAAGATAATATTAATCAAGCACTTTAGGAAAATTTCTCAA  
ATTTA

>chr18\_58849020\_58849220

agaaagaagaatgcttatttacttctggtaatgtaaatgagttcagccactgtggaaagcagttt  
agagatatacaagaacttaaacagaactacatttgaccttgcaatcccattacttgggtgat  
actgaaaggaatataaattttccacaaaaagacacatgcacccatatatttatcacagcattat  
tcaca

>chr18\_76004212\_76004412

cacacacacacacaAAGGGAATATGTGGAAGTGTGGCTTACTGCTGTTTGAATAATCCTGAGGCT  
GCTAAAACTGTAGGTGAGAGGCTGAAAGAGAGGGTTGAGGGAGCTGGCTGTGGACTCTCTTGC  
CCTAGATGGACTTGGCCACACATGTGCTGATGTGAGACCCCAGGGTCGTCCCCCTCCTCCAACCA  
AACCC

>chr22\_16262600\_16262800

AATTTTAAAAATACATATAATTACCAGGCAAAATTGTTAAAATGAACTCTGTCAAACACTTTTTTA  
AGTGAGAATCAATCAAACAATATAGCCAGGATAAACTCCattcattcatttaataacttatttatt  
aggtagctacgtctgataggctaggcctttttcttaagaagtaaggatattggaatgaacaataaa  
aacc

>chr20\_6340000\_6340200

cagagatggccaactattcagaccatgttcacataaggcaaatgtggagccataaccaatctggc  
tgtttctgtacttcgtttccattttctgtatgtaactttccttttctgtccataaatcatcttc  
aactatgcagcaatattgtagtccctcttaacctatcctgtttggaaggtggtgggggttgccag  
ttcat

>chr21\_20697529\_20697729

AATGTTATGGCCATGCACTGGCTACTATGAATACTATGTAATATTGCACGAGATACAAAAAGT  
TCAGTTAGAAAATATAAGAAAAaatttgacttaactagaattcttaactagaatttacttaactt  
tacttaactAGAATTTCTTTCTTCCCAGTGATTTGTTACTAATGAGATTAATGTTTTGTAAAAAT  
TAATA

>chr21\_22307529\_22307729

ctcatctggaaacagagagcaacatctttcatctaagtctatagatctcctagcacttacctcc  
cgggagaatgcactaaagaataatggctttctttctttccctttttttttttttcttcaatttttg  
agatggagtctagctctgtctcccaggtggagttcaatgatgcaatctcagctcactgcaact

ccacc  
>chr21\_23199729\_23199929  
AATGCACTACATATTTTAATTCTGCCAGAAATTTTTTTACAGTGCTGAAGCAATTATCTCTGGGT  
AAATCCAAC TGGGCCACCTGGGTCATCACCTTGACATGCAGGGTGTCTCTACAGTATATCTTA  
GAACATTTGCAAGTTGCAAATGATGTAAGCTGTAGTTCTTCATAAATGACTTCATAGCCAAAGTA  
AAGCT  
>chr21\_25872929\_25873129  
aatttattttcttttgaatatattatccaataatgggaGCAGCagacatcagccctgggaaataat  
ttatgattaattcctcaaaagcaattgtaacaacaactacaaatgacaagtaagacctaattaa  
ctaaagagcttctggctgagcatggtggttcacaccctgtaatcccagcacttcgggagtccaag  
gcggg  
>chr21\_39561930\_39562130  
AACTTACAGATAACTTGTAATAAATCAATTTTAAAAGATAACCTAATTTTAAAATGTTTCAGAAGTC  
TTGATCTTGATCAGGCATATTACAATATAGCATGGGCCACTGATCAAGTCTCCAGCAgccaaatc  
caccctgccccagcctgtttctataaataaatttcggtggaacacagcctagcctattcatt  
cacac  
>chr21\_46042372\_46042572  
tcgcagttcttagggccaggcacctgaaatgaagatatccacagggccatgctttctcttagctc  
caagggagactctgtccttgctgcttctagtttctggtgctcccagcaaaccttggtcctctg  
gcttatagctgcctcatgacaatcttgccttggtgctcatagcgcctctccctttgtgtgtg  
gtttg  
>chr7\_21031675\_21031875  
GAAGAGCGGATTTCTCAGCCAGTTAGGAAATTGAGCACAGACACTATGCTCAGTCCTTTGACCAT  
AGTAATTCATTAGTTTTCAACTGGTCTCCAGATGATATAGTGACTGTCAAATCCAGTTTTCCA  
CTTCATCTGACAACTCATAATTTTGTGTTTGTGAGTATTTGTTAACAAAATAACTTAATATGGTA  
TGAAT  
>chr7\_25200675\_25200875  
GTCTCTATTTTAAAAAAGAAATAATTTGTTTCTCTAAAAGTCCCCATTTGGGGCTTTAAAAATGT  
CTCATATAACTCATTTCCTTAAAAATGTTATTTGATTTTATATAAGGAAAAAACCCAGACTT  
ACAAAGAATCATTTCATAGACATCACTTTTTTTGTTCTGGGTCAAATAATAAAATGTTCAACA  
GGAAG  
>chr7\_31522275\_31522475  
aacggagtggctggaggaagaaaggggtgagggaaaaattgagggtaattgattcttggttcttag  
cttggtggcaggattgacggtgactatgtaagggagactgaaaatagggagagggcagaatttg  
cagtgctctggaatacacgtggaatacctgggagggccgctgagtggatgggtctggtgtgcag  
aagag  
>chr7\_50040854\_50041054  
ATGATAAAATCAGAGACTTCAAAGAACCTCACCTTATGAGTTGTACGGTATTTGCTATGACAGGA  
ACCTAAAATTTCTCTGGAGGCTTTTTAATGCTTGAGACAAAACTTTAAACAATATAGGGAA  
GAAATAATTGAACATCTTTTCCTTCTTTTGCCTCCCATCAGTTTTTCATTTGTGATACATAT  
AGGTG  
>chr7\_53415706\_53415906  
caaacctgcatggtgtgtacatgtaccctagaacttaaagtataataaaaaaaTCTTATTTTC  
TTAAGCCATCAACTATGCACTGAGTATCCTTTTCTTTTGTCCATTTTTTAAAATGCTCTTAT



ataaaataatgggttatgagataggatttgcaagcctccatagtaacctgaaattgaaaaatgta  
caatggatacagaaaatataaaaagcaagaaattaaatcataccaccaagaaaatcgcattaat  
taaac

>chr7\_144428067\_144428267

AGTTTTATGTATATATACATATAttttttgagacagagtctctatcgcccaagctggagtgcagt  
ggtacagtaatggctcactgcagcctcaacctcctgggtcaagtgatcctcccacctcagcctc  
ccgagtagctgacactgcaggaacagaacaccatgctcagttcatttttaaaatttttttgag  
agatg

>chr6\_12687214\_12687414

agcaatatagctgtaaaacagacataagtaggggtgaagtgtgaatgggaaaggagaaagaggaaa  
gcacaagtatagataactctttcaagaaatagagctgtgaaggaaactgagagatatggcaatac  
atagagagttacgtctagaaaggagagagaagtgttaaatgctgcggaagcagccagcagaga  
gagGT

>chr6\_19885221\_19885421

ctcaatcccaggtcacaaaggttttctcctattttatggtgtagaacttttatagttttatgttt  
tacacttaagtctataatccattttaggttaatctgtgtatatggtgaaagtatgaagttttttg  
ttttattttgttttgcatgtgttctagtaccagtttttccaacaccatgtgttgaaaaactatc  
ctttt

>chr6\_22284021\_22284221

TTTAAAAATGAACATTTCTTATGTTTCAGCCAGACTTACTTATTATTAGTGATACTTTATAATGC  
TATATGTAGTAACATCTCAGTTCCTTTGTTTCGGGCCATAGGGAAACCTACATCATAAAATGCCGT  
AAGTTAATTGGCAGATAGGCTGTCTTCCTATTTTTGCCTTTTAGTATCCCATCAAGGCTTCAAAA  
CTTCG

>chr6\_55549241\_55549441

TTCATTTTAGGTGCAatttccttcctcgaagtattgcttttggtcattctcagtgatggtctggga  
atggtaaccacttaaatttttactttctctaaatatgtctctactttacactcaatcttgaatgg  
tagcttaactgagtaGTCATTTTATTCTCCTAACTAACAGTATCTCTAGAAAAGGAAAAGCGTT  
TAAGA

>chr6\_63883641\_63883841

TTCTCAATTGTCATTTTTCAATTATGTCTCTTTCTTGCTCAGATATCACTGGTGGATGCCCATGG  
TCTAAACGTTAATTCCAAAGTCTTTATCCTAAAAAATGAAAGGCAGTTCATAATAATCAATATT  
TGTGTTGTGCAAATAGTGGGCTACTCTGGTCTCATCTAGGTGTATTTGAGCACTTAGAAAATTAG  
AAAAA

>chr6\_76300080\_76300280

aggttcttgctctgccaagaagtgacaatttttattcactcactgtaaggctagaaactactaa  
agccagacattttgtgcacactcttaataacaacattttattcaagacttggtaaaaggctagg  
ggcattggctcacacctgtaatccagaaacttgggaggccaaggcaggaggatcctggataact  
tgagg

>chr6\_77923881\_77924081

GAACTTGAAGAAATTTTCAGAAGAAATAAATGCATATCTTTAATTGAGAGGCCAAATGCACCTCAT  
GGGTTTGCAGGCCAAGCCAAGATGAATTGAGTATTCCTGGTTGCAGGTGAGGTGAATGGGCTTTT  
AGACACAGGGGCTTCCAGGAATAGTCATTGCCTATAAGCAAGCCACAGAGTGTTTAGAAAAGGT  
GTTAG

>chr6\_78362281\_78362481

GGTACAAAGGTTTGGTATGCAATTAGTGCACCTTTCTTAGAATATAACTTAATGTTAAAGGATAGG  
AAGGAAGATATTGGCTATTTTTGAGGAGACC GTTATCCAGTAATCATAGCTTCCTTATGTGCCAG  
CAGAGTGCCTAGAATCCAGCTGGCTTATCTATCCATTCATGTTAAGTTATTCAGCTAAGATTTTC  
AGAGC

>chr6\_88180881\_88181081

gggctgaggtgggaggattgtttaggtggggagttcgagaactagcctgggcaacaaagtgaga  
cgccccaccacaatctctacaagaaGAAAAAAGACAAAAAAAAAAAAAAAAAAGTAAAAACAGCT  
GGTGCAGACTTGAAAACAGAGGCAGGCTTACAAGTGCCTTTTGGAACAAATTGAGCATTTAGAAA  
TTATA

>chr6\_92545879\_92546079

TCTGCTATGCAGCTATTTCCAACAAC TAACAGAATGACAGAAGTTAGAAAAGGGAAAAATATGGGT  
CCATAGTTAAAAAAAAGAATATCATGAAAGGGGTTGTGCACTACAGAGGTATAGCAGAATCAG  
TAGCCCCACACCTATCAGTTACTTCATAGATTAATTCAAAGGTTCTGTTTAGGCCCTTGACTAAG  
GCATT

>chr6\_95386079\_95386279

tccttggaatgtagaatgaaatagccaccatggaaaatagtatggaggtcccttaaataaattaa  
ggatctgtataatataatctgcatttccatgtttattacagctgtattcacaatagccaagatttg  
gtaacaacccaaatgtctatcaacagactaatagacaaaagaaatgtgctatagacatagaatgg  
gatat

>chr6\_102266707\_102266907

AACTTTGCTTCTGCTTTTATTTCCGCAAATATATTTTCATAGGGCATGGCACTTATTTTTCAGAA  
TTTTTCTCattataattataattttaactttattttcaattttattGTTTTTCATCTTGAAAATT  
AATTTTACTTTATGAATTTCCCTAATGTAACCAAATGGCAAGTGCTTTTTAAAGCCAGAAATATT  
TTCAG

>chr6\_103258107\_103258307

AATTCAATGAAATAGAAATATTTATTTCTGAATGATTTTCTAATATATGTTTCATTTATCTTCTTA  
TTTATTTAAATTAAGAGTGCAGAAAAATATTACTTGATAGAGATCATTCTTTAATTGTTAGAAA  
TATTCTATGTATAGCAAAC TTTATTTAAAAAATAAAAACTGCATTCCTCACCACAAAAAGTTTT  
TTTCC

>chr6\_103650907\_103651107

GGATTTTGTGAATCTATAAACTCTGTAACTCATTTTgtgcaaggctcccaccacgttggtgga  
gaatcaagggcataaaggtaaatataatttcatcatggcctcaaactccaatccagttatttaac  
atgattgcccggtaaaacaacagtgatcttttttaacccttaaagaaaagctgctgtgcagggtt  
agttg

>chr6\_117171707\_117171907

cttcatggtagccccctcccctcacaggcctggaggccttaggaggaaaaactggttttgtgggcc  
aggccatggccctactgctctgtgcagccttggcacatgggtgctctgtgtcccagctgctccag  
ctccagctgtggctatgaggggccaaggaacagctcaggctgttgcttcagaaagtgaagctcc  
aagcc

>chr6\_127183707\_127183907

cttttggttttttagacatgaagtccttgcccagccaatgtcctgaatggattgcctaggtttt  
cttctagggttttcatggtttttaggtctaacatttaagtcttaagtctttaatccatcttgaatt  
aatttttgtatacgggtgaaggaaggatccagtttcagctttctatatatggctagccagtttt  
cccag



>chr6\_142229907\_142230107

GAGTTATATATGTATGGTATCATAGTAAGCCACAAACTAAATGCCTTCCCATGCTTATAATAAAA  
AGAAAAGATACATACAAGCTTGTAAGTGAGCATAAATCTTTGTCATCTTTATCCAACCAACCCACA  
GAAATTGAACAGAACTCTTCGTTTAGGTTAACCAAAAACCTGGGCAGTATAAATTTTTTCTCATAT  
TTCAG

>chr5\_9692800\_9693000

TCTCCCAGATCTGCAGGCCTAAAAGAGCCAGGCCTCCTTGGATAAGCATTATGTTGGCAGAGTC  
CATGACTCAGCATGATATCCTTTATGTGATGCGGAGCTGGATTGCTGATCTCCTCTTTGTAGAT  
AAGCCTCGTCCTGGCCATATCTTTTTTTTCCCTCAACCCTGATTCCTCACTTATTTCTTTAAAA  
ATTTA

>chr5\_18689843\_18690043

CTTCCATATTTTCATATTCAGATTTGGAGTACAATTGTATTAATAGGACAAAATAAAAAGCCATCT  
GAAATGCATTATAAATATTGTTTATACTCAGATTTGGAGTACAATTGTATTAAGCTGCCTGAACA  
TTTACAATAGAGACGTATTTAATAAAAACGCTATttagccgggggtggtggcagggcacctgtagtc  
ccagc

>chr5\_20563243\_20563443

AAAAGCATAAATGTCTCTGCAACaataatatatTTTTtatttttCAATTACTTCACAGTTGAAAA  
ATAGAGGATGGGGCAGAGTGAGAAAAAGTATATTGGTGTCAACGGAAATGTTGACATATGTGAGA  
GCTCATAAATGAAAGTATCATCTAAACACAATAACAAAAGTCTGAAATTTACAAGTTAAAATGTA  
GACAA

>chr5\_20658443\_20658643

AAGATTACTTCTTCCCTGACAAAATTTGGCCAGAGAATATTATATAAAAACACTAGCCTTCTTA  
TTGCTCAGATCTGTGTTATCCTGGTCCTGTACTCAGCCTTCACTGACACCTTGACCCTGAATTAC  
ATTATTTCCCTTTAAGTTCAGGCTTGAACCTCTTATATTCCTGGGCTGTTCTTCCAGATTATag  
acagt

>chr5\_25492043\_25492243

tatttcgtatacagaattatatattaactacaactcttattcttagtaacattacatgttgctga  
tagaccagcaacaaatcctggtctatcaaatatttagcattttatagatgagaaatcctacaattt  
tggaaatgactcagacatcccaggagaaacaaaagtaattttaatatttttaatttcatttatt  
ccatt

>chr5\_27108243\_27108443

TATCCAACCTCACACAGCACCGAAGTATgttactggtggcaaatccatatgggtctgaaggaacct  
cagttcttctctcctcagaagaaagaatttgactgaggggcataaggcagaggagagaccaaggc  
cagatttagagcaaaagtgaagtttattaaaaagcttttagagcaggaacaaaaggaagcaagt  
aact

>chr5\_45081843\_45082043

tttgtttttttcttttgctggtgagtttatgtggttccttctctatggtgagattattcttcta  
ttcaatatatggtttgcaaatattttttcccatggttaggtgacttcgttttgatgattgtg  
tcctttgctgtgcagaaatcttttcgtttgaggtagtcacaacttttttttttttttttttttt  
ttttt

>chr5\_77600044\_77600244

atattattttgagacagggctctcattctgtcaccaggctggagtgcagtgatgatcacag  
ctcactgaagcctctaactcctgggctcaagcaatcctcccctcagcctcctgaatagctggg  
accacaggtgcacaccaccatgtctggctattttttaaaaattttttggtagagaaatgtttca

ctctg  
>chr5\_83877044\_83877244  
TTAGGCCACTTTTCAGAGCTAAAAGGCCTTTGATATGAATAATACGGTAAAACTAGAAAAAAAA  
AACAAATTTGGATTAAAAATTCTCATTATTTTCTATTAACTCTTCAACTAGAGTAAATATTTGA  
AATAATTCTTCTCTCCAGATAAAAACAAAAGAATATCATATAGCATTGGGGTGAAGATAGAATA  
TAATC  
>chr5\_87399444\_87399644  
TATATTTGTTAGTGCCTGTAGGCACCCTTAAATACATGTGGATCCTTTTATATAATAAACAAGA  
TAGAATGGTAACATAAAAAGTGTAACCTGCTTTAAAAAAGCATTATATTCTTGAAGTAGTTGAGT  
TGTAAGTGTCTTAAAGAAAGAAATTCACAAAGATTAATAATGTCATTATTTGCTCataatcact  
gcgta  
>chr5\_100480501\_100480701  
CTGTGTATGGATTATCAAGTCATAGAAAAGTAAATGTCATTTTAATGGTGCCCGTTATTGAAATAG  
AGAATAGCTATAACAATGTAAATCTGTCAAATAAAAATTTACTCTGGTAATAAAAAGTTTCTGATT  
GCTTGACTACTATTTAATTCAGGTAGTGTGAAAGATTTATTGTACTTTACAAATTATTTATCTTA  
CTCTC  
>chr5\_103798101\_103798301  
tcagttcctttaaagtgttgatacaactcagtagtgaagtcattgggtcccaggcttttctttact  
aggagacttttactaaggattcaatttcattacttattgggttggttcatgttttgatttcttc  
atgattcaatattggtaggttgatgtgtctaggaatttatccatttcttctatatttttcagtt  
tcttg  
>chr5\_103918901\_103919101  
tgtttttagcaccgtttcttgaaacagtattctttctacatcaagtttctttatataatataat  
ttaaaaatcagttgactatatttggtggacctaattttggactcattatttcccatttactggg  
ggaattcttcaactttatttcccttcttcagattgtgttggtggttatccatagatattttcc  
tttct  
>chr5\_111103101\_111103301  
CAGACATCTTTCCCTTTGTCTAAGTGTCCACAGCACATTTCTACCTGAAGGACCCACAAGCATCA  
TAAACTCAGCTAATCCAAAAGCTTACCATCTCCCTTGAATAGCTGGGACTATTTTCTGTTCTC  
TGTTTTATGCAAATGGTCTCACGTCCACGTACTCCATCAAGGTGAAAACCTTCCTCAACTCCCTCT  
TCCAC  
>chr5\_116914501\_116914701  
TGTTATTATTTTTGACCATACTGGTTTATTTATAACAATTTTATACTAGATGCTTCTCTCATTT  
CTTGATAACACAGCTGCACACACACACACAAATGTCTGTCTATTGCTGAACAATGTTAAGTAA  
TATAATTTGACACATGTACATTGCAAATCAATAAATGTGACATTTTCTTTTCTGGTACATTCTG  
TATAA  
>chr5\_117760701\_117760901  
ctcagaaaaatcagatgacacaaacaaatggaaaaacattccatgctcatggatagaagaatca  
atgtcatgaaaatggccacactgcccaggttatttatagaatcaatgctatttctcattaaacta  
ccattgatgttcttcacagaattagaaaaagctattttaaaattcatatggaatcacaaaagagc  
ctgta  
>chr5\_121244701\_121244901  
AATAATATAAAATaaattagtcaggcatgggtggtgcatgctttagtccagccacttgggaggc  
tgaagctgggggatcacttgaatccaaggggtcaaggctgcagtgagcaatgatcatgccactgc

acttcagcctggacaacaaagcgagaccctctcccCACTGTTCCCCTTAAAAAAAAAAAAAGAGAC  
AAATT

>chr5\_125252501\_125252701

agatgagaaattgctaggtttcagcaaaaactcagaagagaaatacaaggaaaaactcctaacac  
tgtaagtggatgttacagtggtgaaaaccaggacattttaacagagaatgtccagaatggaaaa  
gaaagagaagataatccctgtgatgactatztatgaagattaggggggtcaggggctccttttaa  
gtagg

>chr5\_128554101\_128554301

ccagtgtgccccttttaatttacctattgacacttggggaaaaaacaggtgtattaggtagatga  
tggtggatatctctaaattgattcaaacagtagttccaatcatagctgctataacttgacctaata  
tatttactgaaataaatcaacaaagcctccgacatttggaatgtactatgtttaaataatattct  
tctta

>chr5\_133809301\_133809501

attctaatagttgggtgattctataggatcttatatacagagattatgccgtctgtgaaaagag  
atcgttttatttcttcctttgtggtctggatgacctttatttcttttcttgccctaattgccctg  
attagaatttccactacaatgttgagtatgtggtgaagagcagatattcttctgtctgttctgta  
tctta

>chr5\_143925007\_143925207

CTTCTATCTGTATTCTATTTTTACCCGCAGATATCTTAGCAGGAATTATTTGACTTTTCTGAGA  
TCTTCCTTATTTCAATCACTGATGAAGACTTTCCTATTAAAAATCCACACAAAATTTTTATAGA  
AGTGGGGCAACAAAGTGAGTGAGCTTGTTTATAGTATATGTTATTGTGTATTTTATAACATATTA  
CAATA

>chr5\_161059822\_161060022

TTGTAATACTTGGCATATCCATATTTTCATGCAGAATAAAATGTTTCATAATCTAGCATGCATG  
GTTTTCCCTTACATCTAAGAAATGTTGTCATCACAGCTATTGCTGATGCACAGAAGAAAATAAAAA  
CATGGAGTAAGTTGACTATATGAATTATAAGAAGTTGAACACTTTGGATAGAATGGTCTTATGAA  
CTACA

>chr5\_165145622\_165145822

cacttcttctgtgtgggatctctctcttccttcatttctcctcatctgcaaagctgaggatataatagt  
cctatctgtattagtttgttctcacacggctataaagatattatccgagactgggtaatttataa  
caaagagaggtttaattgactgacagttctgcatggctggggaggactcaggaaacttaaatca  
tggtta

>chr5\_165362822\_165363022

CAGAAATATGCCTATAATGTTGATAATCCTTTTGAAATGCATTATCCTTCATATATACAAAGCTAA  
TTAAAAATGTCAGTTTCTTTATGTGATCTGgcttattttgtattttctctaataaaatgtaagcta  
caaaatggcagaaacatttttctgtcttattcactgttcctcctcagattcctagaactatgct  
tagca

>chr5\_169553022\_169553222

GTGTATACATAGGCCTTTACTCTATCTTTTATctttacccaaatctctggctggttcctgaacca  
tgtttgtagcaggatgggctctagacagatgagaataaaagaactgaacttggatttttagctgcag  
cccaagatgcaaaatgtgcagtttgagccaaaccagggttaattgccactaaagcaaacaca  
caaaa

>chr4\_14252902\_14253102

ACCCATCTAGGTCACGGAATAGCTTTGACATTTTCATCTCTCTGAACTTAGTTTTTACATATTT

TTCAGAAGAAAAGAATCGAATAGCTGGGCCACAGTGTTATAGGATTTATGCAGGTAAGAGAACA  
AAGTTTTGGAATATGATTCTtttggtatccccagttgtgtgatcttgggcaagtcactcagata  
actta

>chr4\_27591702\_27591902

ATTGCCTTTTAATTTATTCATCAGGCTCTCATGCATGCCGAAAGCACATTACTGCACATTGAAAG  
GAAAAGAAAATAATTTTGTCTCTGCTTTGGTTCATATTTCTCAATTCACAATTATATTTAACCT  
CTTAAGAACTAATTCAGGCATGCTCAAATAAAGCTCATCAAAGTAGCCACAGCATAAAAAGAAA  
ATCCT

>chr4\_29333302\_29333502

ctacagaatgggagaaaatatttgcaatgtatccatctgacagaggtctaatatcccggatctac  
gaggaacttaacaaatttaaaagaaaaaacaccccatcaaaaaggcaaaggatagaataga  
cacttctcaaagaagaattaatgtggccaacaaacataggaaaaaagctcatcatcactggtc  
attag

>chr4\_62230005\_62230205

gcaccactgcactctagcctggtgacagagtgcagactccgtctcaaaaaaaaaaaaaaaaaataataa  
taataataattttaaaaatCATGAAATATGAGTATATGGGCAATATATGTCGTGATTTATAAAAA  
TTAATGGTATCACTGTATTGAGGATTTGGTTTGTCTTAAAAACATATTGTACTTCTTCACT  
GCTTT

>chr4\_62867405\_62867605

TCTGTATAATATGTATTCAAAATGGTATAGTAAATGTGAGAGTGTTTCGCTTTAAAGATATAAGTA  
TCATTTATCTGGAAACTTTTTTTTAGTATATTGGGGAAAGCATTAAAGTTAATGTTTACTTGTA  
TTTTTCAAAAATGTTTGTAAAATGGTGAACAAGACAGGCCCCCTTGTTCAATTCATTAAGAATAA  
AAAAT

>chr4\_63433805\_63434005

gttattattttgaggtacgtttcatcgatacctagtttattgacagtttttagcatgaagtggg  
ttgagttttgacgaaggccttttctacatctattcaaataattatgtagtttttgtcattgggtc  
tgttcatgtgatggattatgtttatttatgtatataatccaaccagccttacatcccagggatg  
aagcc

>chr4\_63448005\_63448205

ATATTCTCGATTTTGCACCTTCAGTATTTCTTGATCTTTATTCCTAGGGTCCAAGAAGAACTCCTT  
CCAGATCCCCCTCTGCTGGGTATTCGTCCAATCTCAAATATCTGTGCAGGTCATCTAAAGTAGA  
TCTTTTTTCATTGTGATCTGATTTAATTGATATAAATTCCEAACCACACTGGCAAGATCAACTAT  
ATCAT

>chr4\_63526405\_63526605

TTTTGGCTAATTTTAATATTATGTTATCTGACCCCAATTATTGATTCAGGTAACATCAAATTA  
TAAGATTCATTGCTTTTTTACATTTATATATAAGATGAAGGACTGGAAAGAAGGCAGAGATCTCAA  
AGATTAGGAGACACTTCTGGTTGTAAGAACCAGAAGTGGGACTTATGCAATTAACCTTGGCAATTT  
TCCTC

>chr4\_65270605\_65270805

ACATGAATGCTGTGTCAAATTCACATGTTTCTTGAACCGGAGTGcacttattcaacacatattgt  
ttaaacactttatgtgttaaacattgctattaatgctgaagatacaagtgtgtaaaacaaca  
aacaatctgatatttttgtgcttataactaagggtaggccaataatgaactaaagaagaaaa  
ataaa

>chr4\_68836005\_68836205

ctatttgatTTTTctctctTTTTTTTTctttatttagtcttgctagcagtctatcaatTTTgttgttc  
ctttcaaaaaaccagctcctggattcactaattTTTTgaagggtTTTTgtgtctctatttcctt  
cagttctgctctgatttttagttatttcttgccttctgctagcttttgaatgtgTTTgctcttgct  
tttct

>chr4\_82849576\_82849776

ATGGAGGAATACGGAGAAGAAACAGAATTTTGCAACTCAAAAATAACCTTGTAACAGTGAAGAG  
CCTGCTTTCCTCCAAAGAAGAATCTAAAATTTGAGTTTAAAACATTAGTTGGAGAATTTGAGTAG  
CAAAAATAGACCCTATGTTTTCTCAAAATGTTAGAAGACATAAAGGCTATGGCCAGTATTTCCA  
CGCTC

>chr4\_83042376\_83042576

atagaaatacagatagaaagatggatggatggaaggaaagagaaaggaaagggcgaaggaaggaa  
ggcaggcaggcaggcaggcagagaggaggaaTTTTGATTAATAAAAAATTTAAATTCCTT  
TCAGAAATATAAAATGAAATTaaaaggcaaacagcagtttgagaaaaatatttccaacataaata  
aggga

>chr4\_85952176\_85952376

TTCTGTTGTCCTCTGACGTATACTGCTAAGGAGGAATGACACCCTGTTGCAACTTAGAAAGAAGA  
ATTTTTTATAATTTGCAGTGTTTCATTTAATATTGACTTGAAATGCTGTGGGCAACTGCATTTTA  
ATGGGTAAATTCAGAGCAAAGATCTGTCTTCATCTACTGGAAAAATTTTCATTAGAATTAATGT  
GCCTC

>chr4\_91215777\_91215977

CTATATCCTTCCATATTTTGTAGTTTTTAAATAGGCTATATATCTCATACTCCCTTATTTTGATT  
TTTAAAGTCTTAAATATAAAAGTAATTCATGAATTCATTCTGATTGTTGAAGCATCGTATTACAT  
ATAACACCATGTCCCCGTTGACGACAACCTCAATTCAAAAGGCCCTCTTTAAGGGTAATCACTGTT  
AATGC

>chr4\_99175977\_99176177

TGTGAggatctgagccaaagaggcttagatTTTacttctgctTTTTTTacttatttagttatagat  
cctaagttaaattatttaacctctgagcatttttattatttgtaaagctgacataataaacct  
catacatagcactattatattatttaaatagtaatatatgAGAATTTCTGACACATAAATAATTCc  
acaca

>chr4\_127203150\_127203350

AATCAAGGCATAGTTATTTTGTACAGAGAAATGAGACATATGTGTTTTTCCTTTCATTGAATT  
TTTTTAGACTCAGAAAGTATACTTATATCAACATGTTGTGTATCATAGGTCTTCATAAGGCAAAA  
CATTTTACAAACATGTTACAGGTGATGATTGTTTGGAAATGCAGATTGCTCCAAACTATGTCCCA  
TAAAA

>chr4\_131201750\_131201950

TATTATGACCTAATAGACTTTTGAACAGACCACACAACCTGTATGTTTATATTAAGGCTCACAT  
AGAACTTATTTGTATATATGGGTGCTTTATCTATTTTTTAATTTTTTAAAAatttttatagattta  
gggactacaagtgaacttttgttgcatggacatattagaggaagtctgggctgtcagtgtagcca  
ttacc

>chr4\_132237750\_132237950

aaattctttgcctggggcaatgtctagaagagtatttccctaggtttcattctaaattttttaaga  
tttgaatcttgaatcttgcacttaagtttttaatgcatcttcagttaatctttgcatatgggta  
taagtaggagtctattttcattcttctccatggtgtagcgagtttgcccacaccgtttatataa  
taggg

>chr4\_143665150\_143665350

gcagatgatgacttttaaatcaactatthtaaacatattcaaaaaaccaaagaaaatgtgttcatag  
aattaaaggaaaatatagtcttaaatgaaagaacagatgatgactctcagaaaagaaatgaaatct  
atthtaaaaggcaaatagaaactctataatggaaagaacaataaatgaaatgtaaaattcactag  
atgag

>chr4\_161433150\_161433350

tcaactgcaaccttcgcctcctgggttcaagggattcttctgcctcagccttctgagtagctggga  
ctacaggcatgtgccaccatgcctggctaattgttttgatthtttagtagagatgggatttcagca  
tgtagccaggatgggtctccatctggtaacctcttgattgggtccacctcggcctcccaaagtctt  
gggat

>chr4\_170729425\_170729625

TAATGTCCTCAGATGATCTCCCACATTCAAATGTGGTTTTTCTCGGCTGGAAGGCGTGGGCTCCT  
TATTCAATCTCATTCTAACTCTCAGACAATTTTAGAGGCTGGTGTCTTTCTTTCTAACCAGAACA  
TGCTTTCTGCTTTGGGGCCACAAAAATCTATTTTTATTTTCATACCAGTGACTGAAAACTTTGTGA  
TACAA

>chr4\_190213206\_190213406

ctgcagaatthtgataaataaagagaagccagatgctaataagccaagacagtggggaaaatgtc  
tccagggcatttcagagatcttcagagcagcccctcccatcacaggcctggaggcctaggaagga  
aaaacagthtcatgtgccaggcctagggctctgggtgttctgtgaagcctcaggacatggcacct  
gtgtt

>chr3\_4134800\_4135000

ctctgagcctthaaatthcttgcctataaaatggagatatttagaatggctagctcaggaattg  
gttatggggattaagthtaataaaatthaaacaaggtaataacctagcacatagcaagtattcaaaa  
aGCTTTAGTCATAATTGATATCACTATCAACTAACATTTGTAGATAACTTGTTATATGTCAATCA  
CTCTT

>chr3\_26417796\_26417996

AAAAGGGATTAACTCAGTAAGAACTGAATTGAGTTCTCAGTAAGACTCAACAACATCCCTTTCTA  
ATTCCCTACTCAGCCCCACAATTGTATCTTGGCAGGTGAGAGAAAGAAATCATATTGTGTTCTTG  
CTTCCTTGCCATTCTAAATGTGTTTATGACATGGAAAAATCCAGCATGAAAGGGAGACTGGAAG  
GGGAA

>chr3\_35858396\_35858596

TTTTCGTCACTTAGATGAGTACAGGCTTAGAATTAATTTACTTTGATTTACATAACTAgtgtgt  
gtgagtggtgtgtgtgtgagtggtgtgtgtgtgtgtgtgtgtgtgtatgtgtgtgtgtatagggthtca  
ctgtgttgcccaggctgggtcttgaacttctgggtctcagggatcctccagcctcagcctcccaaag  
tactg

>chr3\_36230596\_36230796

attaccatthcaatctcactgcttgatttggtctgttcagggtatctaattcttcctaattthaa  
gctaggagggttgatctthccaggaatthacacatctcttctaggthttctagthttatgtatgt  
aaatgtgttcatagtagccttgaatgatctthttgtatthctgtgggtgtcagthtgaatgcctcct  
gthtt

>chr3\_39900796\_39900996

aaccggccatgactgaattatgaaaaatgacaaaatctgaacagaccaataatgaataaggagat  
tgatthtagtaatcaaaaacctgccacaagaaaagccccagactagatgactthaaaggthaat  
tctgccaaagcattthaaagaactgttgccagtccttctcaaacctcttctgaaaaactgaagatgag

ggagc  
>chr3\_81275910\_81276110  
AACTTTTTTGAACATACAGTGATCTATGGGAGAAAAACAAAAACAGAGTTCTAAGACTCAAGCAT  
TGGTATACGTAAAAGCTCCAACGTAGAAAAATATTTATATATGAAGAGCAACTGCAACCTTGAG  
TAGGCTCCCCAGGCTGCCGGTTTTAAATCAAATGAATCAAGTGTGAGGAAGATTCTTGATttt  
atatc  
>chr3\_94879510\_94879710  
TCGCATTGAACAATATGCCAAGCGGATTATCTCAGTTCCAGCTAAAACCCTGATTACAACATGCC  
AAGGCATCAAAAATGCAAGCCCTTTGAAGACATGTCTTATTTTCAGAGGACTCATTATCATCGCT  
TCCCATTATATGCAGTTTTACTTGTGTAAAGTGAAGTAAGCTGATTATGAGATTTTTGGGGGG  
AAAGA  
>chr3\_104776910\_104777110  
TGAATATCAATGTAACCTTTCAATATGCAGTGTACATTTGATTAGATGTGTGTAATTTCTACATA  
GTAAAGTATATTTTATTGTTTATTGAAACAGGTAGCCTATAACATGTTACGAAAGAAAATGAATC  
CATAAAATCTTAATAAGTATTAGTATCTTATATTAATGTATAACATGGTTTATTTTATATTTCTA  
TTTGT  
>chr3\_105762110\_105762310  
ttccttccccttaaaccagaacttatacccatcagctcttttggttctctgacttttggatttga  
actggaactacactattggccttccctgggtctctagcttgccaattgcagatcttgggatggatt  
tcttagcctctataatcatgtgagccaattccttttaataaatttttctctctcaatcttactg  
gtttg  
>chr3\_109981110\_109981310  
cttgaaatttataatagagatattgtgtcctcaccacgcccccaacacacacacacacactcag  
acggtaactatgggtggtgattgatgtgttgattaatttgactgcagtaatcagtatatgatgta  
gagaaatataaaatcaccttataataccttaaatatacacaatttttatttttcaattaaatatct  
taaaa  
>chr3\_134967910\_134968110  
TCCCTTCAGACTGAACGCTATGTCAACCTGTCTGTCTGGGTAACTGAACTGTGACAGTGCCCAG  
AGGCAGAGACACTGGCCACCTGGATGTAGAAGTCATGCTGATTTAGGATTCCATGAAGAAGAAAG  
GTTTCAGCCCAGGGCTCCACTATAATCCTCATTCCATCAGGGATGCTGCCTTCCATGAAGTCAGCT  
GTCAG  
>chr3\_135052110\_135052310  
taatggtccacctgggatccacctttctgtatcaaggtagggaaagtgtccccagacagaaagta  
aggatgaacctgagaccaactcctggtgagtttctgtctcaagaattatagttctgctctgctt  
atttccaatagctctaacaattacatgtatatttacttttatagatgATGATATTAATGAT  
TTTTT  
>chr3\_154543306\_154543506  
ttaagtctgcagaagtttctgctgccttttgttcagctatgctctgttcccagaggtggagtcta  
cagaggcaggcaggcctccttgagctgcggtgggcttcaccagttcgagcttcccagctgcttt  
atttacctactcaagcttcagcaatggcagacgccccttcccagcctcactgctgccttgagct  
ttgat  
>chr3\_156595906\_156596106  
tttcatattttctggttctgatctttgttatttcttttttctgctgggtttgggtttggtttgt  
tcctgtttctctagctccttgaggtgtgaccttagattgtttatcttctttcagactttt

gatataagcatttagtgctatgaactttcctggttaacactgtttttgctgtatcccagaggtttt  
ggtaa

>chr3\_166205506\_166205706

AGTGCAAACAAAACCTTCTTCTGCCCTTTTCATTTTACCCTTCCTATATTTCTGCTCCAAAGTGGT  
AATACGGCCACATACTTCATATGTTCTCCACTTGTGACATATTTTGAAACATTTCTTAGATAGC  
TAAGTTATAATTTTAAGTTACTTTTCATTTATTAAGGGATGAGATACCTTCAGAAATTCttta  
attta

>chr3\_180353306\_180353506

atgttcctggtccaaattggagaagttggccaaaacagaggggccacaggctctatgcaagtcca  
aaacctggcagggcactccttaaagctccagaataatctccttttactccatgtctcacatccag  
ggcacactgatacatgggggtgggctcccaaggctttgggtagctctgcccctgtggcttttttagg  
gtata

>chr3\_181518706\_181518906

cactttggaaggctgaggtgggtggatcacctgaggtcaagggttcgagaccaggctggccaaca  
tggtgaaaccccagtaataactacttgagaggctgaggcaggagaatcacttaatcctggga  
gggggaggtcgcaatgagccgagattgtgccactgcactccagcctgggtgacagagcaagactc  
tgttt

>chr2\_4447325\_4447525

gcaggtgcctatagtcccagctactcgggaagttgaggcaagagaattgcttcaacctgagaggt  
ggaggttgctggttagccaagatgacaccactgtgctccagcctgggtgacagtgtgagactgtct  
aaaaaaaaaaaaagaaaagaaaGCGTTTAGCCAATCATTGTTAATTATGCATTGGGGATTTGGC  
TAGTG

>chr2\_16003949\_16004149

ttaaacataaactttccttatcactcatcaattccactcctaggttaattacctaattaccagaa  
agaataaaaacacatgtccccagaaaatatttgggtgcaatattcatagtagctttattcataat  
aattaaaatctgtgggaaaagcccataatgtttattaactaagtgaataaacaattgtgtta  
tgttc

>chr2\_16984719\_16984919

gaacatggatgcctttttatttatgtcctgtttaaataattttcagcaacattttatagttttca  
acatacaagttttttgcctttttggttaaatttattcctaagtattttagcctttttgatgctac  
tgtaaacgggcttattctcttaacttactttcagttttatttgctggttggtgatagaaacacaac  
ttatt

>chr2\_22300295\_22300495

tgtaagccactatgccaaagctgctttattatgtccttgaagcacaagattttctcattttgatat  
agttcaatttatctatttttccttatcacacttgggtgcatctaattgttgatttttaaaaaatg  
cctaaaccaggatcttgaaaattacatttccgcttcttcaaacagttgtattttttatctcttac  
attaa

>chr2\_41274096\_41274296

TGAGTAACAATACAGACACCCAAATAATGTAGAACTTCGGCAAATGCTGAAAAGTAGACAGCATT  
GATTTTACTTTTACAGATCATCTTGAATTGGAGTCTTCAAAATGCAATTTTGAAATTACAGAATTGTT  
CTCTAACAAACAACCTTTTAAATTAAGTCTACAGAAACGTAGTTTATTTAGTTTATTTCTTAGAG  
AGTAA

>chr2\_59210896\_59211096

TTGAAAATAAAAATATTACATGTTtttttgttttgttttgttttgttttttttACTAGCACTATCA



CAACTTGCAGTCTCAAAATGTTACAATGACTACTGGGACCCATTATTTTTTCCAAACATCTAGGC  
TTAAAAAAGAGTGAAAGTTTGAGCTTTGGAAGGCAATGAATCGTGAATGAGCTTTTGCATAACCT  
TCAAA

>chr2\_68779496\_68779696

tttgaatagtttctccacttggtttaaattcttatccttaaccaataccaagaattgacaaatatac  
ttcaggaagaagcagcctgtgattgtcagcttacaaggaaggactgtcattattaaatctct  
ggaatttttagataatctaaaattttcattgctctcacaattctgtcataaaagtgatttttacag  
cctat

>chr2\_77775292\_77775492

CTTTTCTCCATGTGAAGTTGTTGGTTATTTAGATAGGTCCTTAATGCTTTTCTTGAATATTTTGA  
TACATTAATCCTTTATTCTTTATTTGTGGAGAGGTTATCTTCAAATTTTTCTGCTTATCTATTTT  
AGTTTACTGTACTATCATTGATATTTTGTGCTTTTTTGTGTTATTTTGTATTTTAATTTGCTTTT  
CGGGG

>chr2\_134672130\_134672330

tttgcagacgacatgattgtttatctagaaaaccccatcgtctcagccaaaatctccttaagct  
gataagcaacttcagcaaagtctcatgatacaaaatcaatgtacaaaaatcacaagcattcttat  
acaccaacaacagacaaaacagagagccaatcatgagtggaattcccattcacaattgcttcaag  
ataat

>chr2\_139102530\_139102730

TCTTGCCCTACTCCTTTGTACTAATTCCTTTAAAGTCCTCTTTCTATGTCTAGTGTACAGGGCAC  
AGAATGAGGAGTTAGACAGTCTCACTCATGAACTTCCACCACGCCTTTCCCAACATACCCATGT  
GCATTCATTTTCATAGGTGGATGCTGCCAGGTTAGCAACTTGCCTTCTTCTGTGTAACTATCTGTG  
AAAAC

>chr2\_139489730\_139489930

ACATTGCTTTGCAAGTTTGGTGATCTCATAACAATGTGTCAAAGGAGGGCTCTGTGATTAAGG  
ATGTAATCATCTTGGGCAATCAAAGATGTTTTTTGAATCCAGTAGAGAAAAGTGGCCTATGGAAA  
GTCATAGAGAAGAGGAGAAAAGTCGAGAAGCTCTCCTGGTAACTGGTCACACATCCAGCACTGGAA  
GAGTA

>chr2\_154696554\_154696754

TTTCTTATTGCCAATTAATGTGGGTGGCACATTGTAGTTATTGCTTGTTTTATTAACCCACATTTT  
TCTATGTAATGTTGCTCTAATGCATTGAAGAACTTTGTTTACAAATAGAAAAATAAACAACTAA  
CACATAGTTTCAAGTAAAATTTCTTTGGCAATAGCATGTAATTGAACAGGTTTTGAAACACTGCTT  
TTCCC

>chr2\_168027154\_168027354

agtgcggttcaatatttccagtcctactactgataatttctattttctcctctattttaagcaatc  
ttgctagacgtagcaattttattaattaataaagcaactagttttgctttatctttatggtaca  
tttctattatagattttcctaatcttatttttctattttccattcttcaacttgctttcacttta  
tttta

>chr2\_200383555\_200383755

GTAGACTCTCTGAGGACACTTTCTCTTGCTACTCATAATCCAGGACTTGCATTGTTTAGcttc  
tctcctagcttccttgcttttcttgetctcatctcatgtcctttgattcggtgctttcccatcat  
tcctttactccttgctttgtctccttttgcaacttttttcttatttctttggtttccctcttgac  
tttct

>chr2\_212786955\_212787155

agaactgaaaagtgactaccagttacattataaatgtaaggaagttttaagaatagcttaaacag  
tctattttgctcattatthttgtatthttcatgtatgaacaagagtgacgtgaaaaattcctgtcta  
aatgattctaataatcaaaagtctctctgaatatgtaggaaaaaagtcctaagtaacaagaagaat  
tacaat

>chr2\_215325955\_215326155

tggggcctctcagcagcttgctcaggggccagaagtagcagcaatggcctggacagttgagtagg  
tcctcatacccctgggcagtttggtggtgcataggcaatggcagtagcagtgataaaacaaccctc  
aagttccaagggggaacactctagtgtaaatggtggcggtgatgagctgggtaggccagtcctca  
ggccc

>chr2\_221126956\_221127156

AAAATTCATCTTAATTCAACCAACTGATTTTCATGTAGGCATCAGCAGGAATCAAACCTGAGCATGA  
TATGGTCTTTAGATCATCTAGCAGCTGACCAGAACAATTGATTTTTTTGTAACCTGCAGCTTTTCA  
TTTGGCATCATAAAGATGCAACCTAAATAAAGCATTAGCCTCTAGAATGTGTTTAAATTGAGTTT  
CTGGA

>chr2\_229450356\_229450556

catcatgaagataggagaaagtttacttttccattgagtgagggcaaacagatggCTTGTGATTC  
CCCAACCTCAACTCTTCAAACTCTTggccgggcggtggctcacgccttgtaatccagcact  
ttgggaggccgaggcagggcgcatcatctgaggtcaggagatggagaccagcctggccaacatggt  
gaaac

>chr2\_229729156\_229729356

TTAATTCCTACTAAAAAGTTCAGCATAGAGCTGATCATACTGTGTAGACGTGATCCTTAATTTA  
AAATGTAGGCTTGGATAGCCTTTGTGGAAAAAATAAGAGCAACAAGGATAAAAACAAATTACCTAT  
GACCCAAGAAAATATTTCTGGCAAAAAAATTTTTAAAAAGGGAGGGATTGTAATAATTTCCAA  
AAGAT

>chr1\_37586813\_37587013

gggtgccactgccctccagcctggaggcagactgagaccccatccaaaaataaaataaaaa  
gcagtgacagtgcttgccacacagtaagcaccagtaaatgatgattattgtCCTTTTTCTGACA  
ACTATGAACAAAATAAAACACACACAGCCCCTTCCCAACCTCTCCTTCTGAAGGTTAAATGATGC  
ATTGA

>chr1\_49737613\_49737813

catgctgtgacagaaaacttggcctttgtgtgtacaatggatgtgaggtcactggtgagaactac  
agttttggaagtggctggcagtggtacaatgaatgattttgttacattgtcacactaatgttat  
tactacaggaggccactcatttctttgtgcacttagttttaaaaacatgcagtttaataacttag  
aaaac

>chr1\_57923012\_57923212

caagagccattcacatattacatttggtagcaaaaactaggtctgaatagatctcttctgttaaa  
ggatgattacataggcaaacagaatcaatgtggggagtgaaaagtgctatagaacaaggaaaca  
ggaatgatgtattcagaagacttctgaaaattatctgctgctagatctctattagaagtaatttt  
ggaaa

>chr1\_58204812\_58205012

ACACACAATGACTTTAAAGGATAAATATTAATAGATAGTCATCCACCTCTGGTCCTAAATCTCTG  
TGGGCTCTCCATTTTCTACTGAATAAAGTTCAGAATTCCAGGCAGACAAGTTCAGAACAATACCT  
GTGTGAACCTGACTTCACACCTTTGCTCATCTGAAGTGCTCTCACATTTCTTTCTGTACTATCT  
TTCTC

>chr1\_58846812\_58847012  
tctcaggggaaaagtggggagagagagcttcaagaagaatagctaataatgattggtgggcttaata  
cccaggtgatggaatgatctgtgagcaaacaccatggcacacatttacctaagtaagaaatct  
gogcatgctacacatgtatccccgaacttaaaataaaaagttgaaaaaaaaaagatgggagaagta  
ggcca

>chr1\_61217812\_61218012  
ATGGGCAAAAAGTGGAGCCACCTATATGCATATAataatgacacacataatatcaatcactttg  
tgccaagcaccattctcaacatttttcaattataaccactgatcccctaattatacttatttttca  
gatgagaaaacttttagcagtgagagtagctatcatgcccagggtcacataggcagaaagtgtcag  
agGCT

>chr1\_63502612\_63502812  
tatttttttaattttgttattattatactttaagttttagggtacatgtgcacaacgtgcaggt  
ttgttacatatttatacatgtgccatgttagtgtgctgcaccattaactcgtcatttagcatta  
ggtatatctcctaagtctatccctccctgctccccccacaccacaacaggccccagtggtggtg  
ttccc

>chr1\_73680612\_73680812  
TGTACAAGGTAAGTGCCATCTGCATCCTAAATTAACATCTTCATGCAGAGAATCAGTCTGCCTA  
ATGCACTGATATATAATAACAATGACAGCACTCACTTTTAAATATATTGCCGAAAAGGCAAAACAG  
CGCATTATTCTTATAGCATTTCCTACCATGTATTTTTCCACAATATAAATTGCCAGCTTTTCA  
AGGCA

>chr1\_96640012\_96640212  
aaattaagaaatacaaatggctaataaacatattaaaaatggtcaatctcagtggttaataaagat  
gctagtcaagataacattaagataatacatcacatttctttttttcttttttagttactatgtcc  
agtgttgacaggattcaggaaaatagtcattcatgctcagctccaagggtgatttagcaatgtgt  
gtcaa

>chr1\_96697612\_96697812  
gccttcttcaagccttcagattacggcatcctcagccaacaccttgactgcagcctgatgagaga  
ctctaagctagaaccaccagctaagcttcttcagattcttgatactcagaaactataagatat  
aaatatttgcatttttagccCCAACACTGATACAATCAAGCATACTACTATGGAAAAAGaat  
tattt

>chr1\_102883612\_102883812  
gcaatcaatacaagaacatgggtagatgataccccattttgtaaattaattagctaaggatcaga  
aaagataagtagcttTATTGTGTTCCAACATTA AAAAGCAACAGACCTGTAACATGATATTTTTT  
GTTCCGGTTTGAATGGTCTTTCAATTTTACTCTGTTCCCTCCCTCCAACCTCCTTTGATACAGG  
GATGA

>chr1\_103111012\_103111212  
AAAAGAACCCAAACCTCCTAGAGAAGATGAAGTGGAGGGGAGGACCCAGGATGCCAACCCAGACAGA  
AGAAAAGAACCCAAACCTCCTAGAGAAGATGAAGTGGAGGGGAGGACCCCTGGAGAAGAGGACTGTT  
GCCCTCTAGAGAAAAGAGCAACATGGTGTACCACAATTGGGACTGGGAAAATTTACCCTCTTTT  
TGCCT

>chr1\_107679077\_107679277  
ACTTTACACGGTGCATATACTAGAAAAGTACATGGGTGCTAGAAAACATGTTCCCTGCATTGGTC  
ACTAACTGGCAATATCTTATAACCATTTGCTAATTTTTGTGCTCCAGTATCATTAACCTCAGTAAAT  
ATGTATATTTTTATTACATTAACAATACGTCCTTTGGTCTGCTGTTAGCCTTGAGAGGAACTAAA

TGAGA

>chr1\_111476277\_111476477

aggggaatcacccatcccagaggtcgaaacttgagttaatgcaaacttgccatggagagctaca  
gtattctgagttgcttagtaaaacttgaaaggcagtcaggctataaggactacaactcacaggtg  
agtccatgtgctgaactgggccaagaacagtagacttgggggacatgtgacctatggagacacc  
agctg

>chr1\_117286877\_117287077

gggaaagcaaaggagttcaagaaacttccagtggttgggggggagggggttgctgagcctccaga  
gaaagagtgcagaaatctctagtaagagagaatgagccacacacagtcaggaaactcagggaaa  
tgcctacaacttccaggatgggaaataccctaagcaggacaggggaatataaaggacaagacagac  
aataa

>chr1\_118989877\_118990077

tgaaaatatgacacaaaaattgtggattacagttaaagtagtacttagagtaaaatttacagct  
ttaaacacatatattaaaaaataagaaaggttgaaagtcaataatttaaacttctaacttaggaa  
gccaggaaaagaagagaaaatcaacatttaaaaagtagaaagaagaaaataaaaaataagagttga  
actaa

>chr1\_163725976\_163726176

CACTGatatacatatatacatatatacatatataGCACTGAGAATAGTGTCTGAGATATAA  
TAAGCTATATTATTCCTGTAGAGTccctttaagatgaaaatttccatttggcaacttacctccc  
aatcatcttttctccagggttaaataatcctcagatctttaacaataaaatggttgtttctacacctc  
ctgcc

>chr1\_187401377\_187401577

GAAGTCAAAAGGTTGTTCTTTACATTAATCTACCTTTTTTAAAAAATTGTCTTATTTTATTGTCA  
TTACTTTCTATCCAACCAGGAAAATGATGCTATATTTTTATTTTTGCTTTTTTTCATTTCAAGGTG  
CTATTGCTATAAAAATAATAATATCACTAGTATCTTCAATaataataatcgtagttcacacttac  
atggc

>chr1\_187797177\_187797377

aaggccaaggcagggggagggttgagcccaggagttgagaccaatctgggcaacataggaaga  
tcctgtctctacaaaaatataaagacattagccagggtgtggtggcatatagccccctctgttgtc  
ccagctactcggagtgtggtgggagcatcacttgaacggaggatgtctaggagccatgattgt  
gccac

>chr1\_215928177\_215928377

CACTTGGTGAGTGTGATCCATGTTTTGGTAAATCACATCTATTCCTTTTAGATTTTTGGATGGG  
TAGGTAAAGCTTTCTAGTTACTAGTTTCTTCATGCTGCAGAGATCATTGCTGTCACGTGGCTGTT  
TTCCCTTCAGCGCTTGCCATTTCCACAATTAACCTTCTAGTCTTGGCACGCCACTACACACC  
CAGTC

>chr1\_216973177\_216973377

AATTTATCTGGAATGATAGATGCACATGTCTCATTAGTCAGTAATTTGGGATTATCACTTATGTA  
GCCTTAGAACCATGTAATGTTCTTGAGGAAGGGGAGTCTCCCCCTCAAAAAACCCACATTTAT  
TTGCAATAAAAATATCCTTACTTATTGCTGTGAGGGGAGAGGAATCTCAGCACTCAATAAAA  
TTATG

>chr1\_240207777\_240207977

AAAATTAATAACAGCATAATTGGAAAAAGTGCACAAAATCTGCTCTGCTAGCTGACGTATATTTT  
TAAAAAGCTCTTGGACTCAAATGAAGAAGGTAAAAATGGTGAACAATCTCAGGACTGCGCCTGA

TGCAGGGCATTGAGAAAAGCTTCTTTCTTCTTCTCGAAAATAAAATTCTGATGAGTCATTTTCTTC  
TAAAA

>chr9\_1394600\_1394800

ttctaaccaaatgcaagggagctgaagaaccttgataaaaggttacaggaactgctaactagaata  
tccagtttagagaagaacataaatgacctgatggagctgaaaaacacagcatgataacttcgtga  
aacatacacaagtaccaatagccaaattgatcaaatggaagaaaggatatcagagattgaagatc  
gactt

>chr9\_9627200\_9627400

ggaggctgaagcaggagaatcgcttgaatctgagaagcagaggttgactgagccgagattgggc  
cacttcactacaacatgggacagagtgagactctgtctcaaaaaaTTCTATTTTGCAGAAGC  
AATAACAAAGTCCACTGTAGATGCTTAGTCAATTCTCCTGCTTAATTTGTGTGTATTCGTTTGT  
ATCTA

>chr9\_15784600\_15784800

AGGCACAACAACACTACAGGAATTGAATTATAAACTTGAATTGCACTCCAGTGAGGAAGCTGACAAA  
AACCAAACCTCTTGGAGAAGCTGTTAAGGTAAGAGAATAAAGGGATATTTGCATAAAGGGATATTT  
TATCTATGTGTGGATCTTAGAGGGAATTATGATATCTCCTGAATAGGAATAGATCCCAAGATGTA  
AAATT

>chr9\_17823400\_17823600

ttgtagtatttatatatttcttaatcacttcccatatataaaaactgtgctatTTTTaataggtat  
ctatctTTTTTTTTgtacacgtcactgacaaagtTTTTgaatatatgacctctaacctatTTTc  
ctcatgggtcttacggttcataatgtgcagTTTTccatagcacagtggtTTTTcaggaatgcatag  
gtggc

>chr9\_30501800\_30502000

TCCCTCTGAAATCAATGAAGACAGTAGACAAAAGAGGTAAGTATAATTTTACACTGTATAGTTTT  
CAAAGTTCTTTTCAATTAACCATGAATTTTAGATTTCTAGACTACTTTACAAATAAGAATTTGAA  
TGCTTAGACTAAGATACTTAGTTGAATTCCTTCCAGTCTCCAGATAGCAATTTCTATATAATAT  
GGACT

>chr9\_66399380\_66399580

ttcttttgagaagtgctcttctcattctcagtaaactatcgcaagaacaaaaaccaaaccacata  
ttctcactcataggtgggaattgaacaatgagatcacatggacacaggaaggggaatatcacact  
ctggggactgttgtgggggtggggggaggggggagggatagcattggggagatatacctaattgctag  
atgac

>chr9\_77076580\_77076780

aaaaatataggacaaaaattgaaggtatataagaaaattatagaaagtttatatgacaaatcttg  
ggaaaggaactttatgtgtgatcaagctggctaagatttgaaggaaattgtttacatgtTTTTga  
aattgagcattactatcaaaagcaaactgacataaaaactaaaatttggttctctctgttaaaca  
ataag

>chr9\_85697180\_85697380

AATGAAGATAATTTCTAATTAGAGAATGAACCTGACCTATCTATCACTCATGGAAGCCCACTAC  
CATTGGTATCCCAGGGAGAATGATGGTTCTAGCTGAATAACAACGCTTGATTAGCCCTACATCAC  
CCATGGGAGCTCCTTTTATCTCAGCAGATGAAATCAGTAGTACAAATCTAACTGGTTTTATCGTT  
TGCAC

>chr9\_99465979\_99466179

tatttaaagtgtggtgaggaaaaaacctaccaaccgagaattctgtatcctgtgaaattatgctt

caaaattgaaggaaaaatgaacaaacaaaaattgagggaaatttgttgccagtagacaagaggaaa  
ccatgtcagataccaatctggattcactaaaagaatccagaaatcctaaatatgtagatatatgg  
aaaat

>chr9\_106931579\_106931779

GGAAATATTGTTATATTTGATATAAGAAATGGAAACAAGAGCTTTAAATTTTATTTAAAACCTCA  
GTATGTTAAAACAACTAAAAATGAACTTGATCTTCTGTTAGTGCAACTTATAAAATATTAAGGA  
GGTAGGTACTtttttctactgttccttttgcctagtccttcttcttttagtttcttactttttta  
tccat

>chr9\_107341579\_107341779

AGAGCGGTCTCTATGAACTGCCATCACCAAGTCATTTAGAAAATGTAATTAGACAGGCTAAAGA  
AGACTTATTCCAATAGAGACATAGAGTCACAACTAGTGAGAAAGGGAATATGATAACACATGTA  
TTTTGTTTGGTCACATGGAATTAATGAGAtttgccacagtcctcacccttctatatattgcttcaca  
tccag

>chr9\_108611779\_108611979

TGAGCCATACAGCATCTGTGATAGAGAAGACTCACTCAGGAGCAAGAGTTTGAATGAAAGATAA  
GATAGTATGAACACACTTCTCCACTGCAGGAAACCTTAAAAATATTGCTAATGGCCTTTTGGTAT  
GGGAAGCAGCAGAGCTGAGCCATCAGCACCTCCCTGTGCTCTCCTTGCCCACTCTGTGGCTCTC  
CGCCC

>chr8\_3327992\_3328192

ggacattgacatggatacaacctaccagcctcgtaaactttccctgttttattcgtattttgt  
atgtacatttgtgcatgtagctctgcacaaatacgtcacatgtctcggctcctgaatccaccgcc  
atagtcaatgcagggcagctccattccttccaaattctctggtgctcttcccttaaaatcacact  
catgc

>chr8\_4887192\_4887392

tggtgggaggtaattggatcacaggagtgaatccttcgtgagtgatttaccatgattacattggt  
gctattcttgtgatcgtgttgcaagatacgtggttgcttaaagtggtgcagcaactccccctg  
gctctctcttccctcctgctctggctatgtaagatgccctgcttcccttttgccttccaccgtga  
ttgga

>chr8\_5809592\_5809792

tcattggtaagttctaagagttcagtggtcagggcatacctgaatatcatttctaagataccag  
ttgttccacctcccaaactttatcctaaaaacagaaatggcatgtggtagacctcttggagttt  
TATTGTTTtaataatactttacttttttagatcagtttttagatttggagaaaaattacacaaaatg  
taaag

>chr8\_12531229\_12531429

tccccacaagcaccttcccctgctccacggtgccagtcctcatcgaccaccaagggctgagga  
gtgtgggcgcacagagagggactggcagggcagctccacctgtggctcctgtgtgggatccactgg  
gtgaagccagctgtgctcctgagctctgatggagacttgtagaacctttatgtctagctaagggat  
tgtaa

>chr8\_14032229\_14032429

GCCttgccagggtgctgtaataaagaccacagctctgggtggcttaacaatacaaacgtattgt  
ctcacaattctggaggctagaagtctaaaacaaaggtgtcagcataaatgcttccatcttaaagg  
ctctgagaaaaggatttgttctggacttcttttcttccaatatctcttgacatcatcttcccttt  
tgatg

>chr8\_19787320\_19787520

GATGATTATATTATTTCTTCTCTCTTAAAGTAGTTTTGTTTTTCCATAGTTTTTGGAAAGGG  
GCAGGGCATGAACATCCCCAACTCAGGACAATAAAATCTTTAAAATGTGTCCAGGTCATTCTAC  
ACTTATGGTTTTGAAGCAGTGCTCCCCACATCCCACCATATTTCCAGGTCCAAGGGCTGCCAATCT  
CAACT

>chr8\_31742058\_31742258

GTGACCACTCCCTTTTTGCCTTCACTTTCTCTCCTGACTTGCATTTGATCAGCTAAATTTATGTA  
AAAAATGAAGCCTACAACCCTAAGCTGATCTGAAACACACAGCAAATGGAGGTAGCCACATATA  
TATTTGATAATTTCCCAGTTTATAGCATAACAGTTAAATCATTGTAATTTCTTATGGAATGTATG  
GATCA

>chr8\_34497858\_34498058

CCCCAAGATCCAGAGTCAGCATCAGCCAGTTTGTGTACCTACGCTTTCTGTCTTTCTGCCCTG  
ACTGCCACTGGGTTTTCCCTGCTGTTTGTGAGTCTCCTCACAGGAGGTCTACAATGGCAAAGACA  
TTGAAAATATTCATTGAGAAAGGCCACTCTCTGGGCTGCTGCCTCCCACACACCTCCTCCCTCAG  
ACTTC

>chr8\_34505258\_34505458

tgtgggtgaccatcttcttctcgtattcccatatgggtggagagcaaataaagagtaagcaagttt  
cttttgtctcttcatacaaaggcacaatctcatttattcataagggttttaccttcacagtcta  
attacctacagaagacccacctccaaacaccatcacggttgaaattagccttcaacatatatat  
ttttg

>chr8\_53943847\_53944047

CGTGTACTTCTGATATAAAATTACTTAACAAGAGTTTCAAGATGTTGCCATAGAAAAGGAATCTCT  
AGCATACTAGTGACAAATGAAGTTATTATAGACCTATACTCAAATTACATAAATACCCAAAACAAG  
TGAGGGACACATTAGACTAGAAAAGTTGTTGGCAATATATTGAAATTATTGAAATTTCTCATCTTG  
GTATC

>chr8\_63591046\_63591246

CATAATAACCAACTATCGAATAGCTTCTTAGATCATTACAATATTAATAAAGTTCATTAATTA  
ATGGCCCAAGTCACCAAGATGAATATTTTATAGGCCAGTCATTTCAAACATATTAGTACCATCAT  
TATTAtatattgatggttatattgataatataacatcattatattatattatcattacattgataat  
atcat

>chr8\_63859046\_63859246

TACCTCTGAAATAACTAGTCTCTCCTAAAAGCCTTCATTATGGTGGGGTGCTGCGAACTCCTCTC  
TGCAGTCTTTGAAGGGCCTCTCTGTGTGAACCTAAGTTGATGTCAAGCCTCTTCCCCAGCTTTATC  
CTTATGAATTTATATCACGGAACAAGAAAATCACAGTGTAATAGCCCCATATTTGAGTTCTTCA  
AATGT

>chr8\_65217246\_65217446

tacttcaaaaatataatctttaaactattcattggttcttcatcgctagtcttagtcccatccaccg  
tttcttgggtggataactgaaataggctcctaattgtatcttctggtttctcctcctgcctttata  
atttaactcttcatacagcagacagagctatcttctttatagtctaataagacacattacccttct  
gaaaa

>chr8\_65411246\_65411446

TGAACTTCTTACATGAGTAGGAAAAAATCTTTCTTGAATAAGCTACTACCATTCTCAGTCTCT  
GTCACAGAAACCAAGCGCATGTTAAGATATCATCTCTCTTTTTTGCAAAGTGCTAACACCATGT  
CATTAAAGTTTGCATTGACTAACATGCCAGAGTTAGGAGTATGATAGGGTATAAAGAAATCCACAA  
CCTTC

>chr8\_69600846\_69601046  
aagaaaacgtggtacatatacacccatggaatactatgcagccataaaaaggaatgagatcatgtc  
ctttgcaggacatagatgaagctggaagccgtcatactcagcaaactaacacaggagcagaaaa  
ccaaacactgcatgttctcactcataagtgggagctgaacaacgagaacgtggacatagaaaggg  
gaaca

>chr8\_78351445\_78351645  
ttacattatatcatgtatcactatcttctgtattattgtggattagtgtggaattaaaatac  
cagtttctttatccattcatctgttaatggccccttaggtgtagtttcaggctgttgaataaat  
atgctctgaacatttgagcacaagtctttgcatagttgatagtttcattatatcttgggtaata  
actag

>chr8\_92910024\_92910224  
ttttatagaaaatgtttgccaaaccctgGTTGGAAAGGAAGAAAAGTGTCTCTAAAAATTATATT  
ATCAATATTTCCAATCATTTAAAACTGTGCTGTCAATTAAGGAATTCATAAAATAAAATAAGCAT  
AAATATATTTGTCTTCGTTTCAGCTACAAAGATTGAAATATTATACACAAAATTTTAACAATATGG  
CTATT

>chr8\_97424024\_97424224  
TTCTTAGCAGCTATGCCTGAGCTCCAAGGAGTAAACACAGAAAAAGCACACATCAGAGAAGGACA  
ACAGCTAGAGAGAGAGAAAAATGACAAACAAAGCAACCAGGACAGAAGAAGTACTCATCAAAAAT  
TAGAGCTATTGGAGGAGATAAGTCTATGACCCATACAAAAATAAAAAATAATGAGAACTGAGGAG  
ATTTA

>chr8\_132040618\_132040818  
GGAGACTTTGTAGTCACTGCACATTGACCACTTGGGGCCATGAACTCATTCTCAAATGAACTACC  
CGCCTCCAATAGGCTGGGAAGGCTCACCCGATGAATGAGGGTGTGGGAGATTTGACTTTAGAAGA  
AAACCAGCTTGCTCTTAGTGATTTTTTTTCTTGAACTAATTAGCAGAAAAAAAAAAAAAGAACTAAA  
AAGAC

>chr8\_132121818\_132122018  
cctaatttcaagattgttgtgtctcaggaatagggaggcctgaggagaggaagagagatgtgtg  
tgtgcaggaggaggagccaatcaatggagcagtcagaacacacacaacatttattgattaagtcca  
ccgtcttacatggatgcagtttagcggcatcccaaaacaattacaatagtaacatcaaaggtcatt  
gattg

>chr8\_139065818\_139066018  
cttccatttgtttgtatcctatcttctccttgagcagtggtttgtagttctccttgaagaggt  
ccttcacgtctcttgaagttggattcctaggtatcttctcttgaagcaatgatttggctc  
tctgtttgtctgttggcgtataagaatgcttgtgatttttgtacattgattttgtatcctga  
gattc

>chr8\_143243893\_143244093  
gaaagagagatgaagatgggggacagatgatggatggacgaatggaagatgggtgagtggatgga  
ttgactgaattcaaggatggatggaggatgggtggatgaaaggagatggagatggaggatggat  
gggcagaggatggatgggtggatgaattgatgaatggatgaagaatgaatggatgaaagagagat  
ggaga

>chrX\_7681200\_7681400  
aaccaggcccttcacaatgtgaccacattacagcttctctcaacagaaggcaggggatagttcac  
ccctaaatgttgagttcacctcattacttggtttagccaatgggtgtcaacagtgccagagattt  
tgaaagtgcttgtgctttctcttgtgctcctgctgttggccccatctttagatcatgcctgagc



tagct  
>chrX\_14744279\_14744479  
AGTTTCAGTTTATCCATGACTCAAGCTCATTTTCATATAGGAATCTTGTCATATTACCATAACATT  
TTATTCTGAACCTGCTAGAAAGGCAATTAGTCATTTATTATAACACAAAAAATTCAAATTGGTT  
GCAGTTATGTTTTTCAGAATCAAACCATCTCCTTTGATGTGAATACCATAAAAGTTCTATATTTAA  
AAGGC  
>chrX\_19157479\_19157679  
cctgcctcagcctcctgaggagctgggattacaggtgcgtaccaccatgcctggctaattttttg  
catttttagtagagacgggtttcaccatggtgcccaggctggtctttaactcttgacctcaggt  
gatctgccacctcagcctcccaaagtgcctaggattacaggtgtgagccaccacgcccggccAGC  
CCTTT  
>chrX\_27022079\_27022279  
aagatcactggtggaatgtaaaatggtgcagccactttggagaagagtttgaccgtttctcaaa  
aagtaaaagatgcaactaccacatgaccagcaactctgcttgacttgcatgtccaagttcata  
gcagaattacttataatagtcccaaactggaacaactgaggtgtttaatttttaaatggatcga  
ccaaa  
>chrX\_27939879\_27940079  
TAGAAAAACAAGGGTTGATTAATCGAATTTTAGGAGGATATTATTCTATAAGCAATTTAAGTAA  
AATTTCTTTACAAAATGGTACTTAGGCTACAGAATTAAGTACAAAATGTCTATAAAAAGAGGAA  
AATAACTAGATAAATATGTGTCAATTACAGCACAGGCTTAAAAGGGAAAATTATTGATAGGCAAT  
GTGCA  
>chrX\_30290679\_30290879  
CAGTCCTATTTTTTCTCAAGTCCTCAACTTGGGTTCTTATATCTCAGTGCCCAGGTACCTTGCC  
TACTATAGTTATAGGGTCTAGTACCACCTGTGCTTCTCCTAAGGACGATTAAGAACATGAACACG  
AGAGGTGGGtcagccatggttcaatcgaagaacaatcactgataatgaggtagagtaagaatt  
tatta  
>chrX\_31787679\_31787879  
cacacataaaatacactaacactaatgatagctgatgagcaaaaaaagtcacaaaaagtatctc  
atgttttaagaaagtttacaatttgtgttggggccacattcaaagccatcctgggacgcatgtgg  
ctcacaggccatgagttgaacaagcttgCTTTAGATCATAATAATTACCTCCTACAAATCTCCTT  
TATTT  
>chrX\_38527456\_38527656  
tggactaaatcaccaaagtttctcccggcccaataactatgactGGAGAGGGGTGGGAGAGGTGA  
TATTTTTATGTTCTAATTCTCAATTTGCTTGTGGGGCAGAAGTATCCCATAGCTGAGTATAATGT  
CATAAAATAGGATATGTGTATAAACAATGGAATAGTTAGTTCTGGCCTCTTCTGGAGGTGGCTTC  
ACACC  
>chrX\_46259856\_46260056  
agcaacatgacaaaactccatctctacaaaaaaaaaaaaaaaaaattagatggccttgggtggcat  
gtgcctgtagtcccagctactcaggaggctgaggtgggaggatcactaggcctgggaggtggaga  
ttgcagtaaaccaagatcgcaccactgcactccagcctgggagacagatcaagacactgtctcaa  
aaaa  
>chrX\_53495275\_53495475  
ctacttctgtctagttacaaaacattttcatcaccocaaagaaaagccctataactcactaagcag  
ttgctccccatttcttgcacatgtaccggagaccggccccactcagcccctggcaatcattcat

gtgtgttcagtcctttatggatttacctattcagggatcatcacgatatgtgacttttttttttttt  
cagac

>chrX\_63469875\_63470075

tccaagttctctgattcctttcttctgtctattagagctctgatggtgaaccactctagcaagtatt  
tcaatgcagtttttgtatTTTTtagccacaatttaaaaaataatttctacctttcagtgattt  
ttaaattttgctcacatactgttttcttttttttttaaaaaatttattattattatactttaagt  
tttag

>chrX\_66292275\_66292475

tacaaggacaactacaaatcactattcaaagaaatcagagatgacacaaacaaatggaaagacat  
tgcattgtcaatggataggaagaatcaatattaaaattaccttacttgtcaaatcaatataatagat  
ttgggtgctattcccaattaaactaccattgaaattcatcacagaactagaaaaaagatttaaaaa  
tgtat

>chrX\_74036875\_74037075

CGTTTGCACATATTAGAATATGGAAGTTCACCTGGTGTGAAATAAAAGGACTTGAGAGATTCAGATT  
TTTTTTTTTAAGTAAGGCTTCTAACCTAGACAAAAGCCCTATGTGAAATGAATAATTAGTATTGGA  
AATAGCAAGCTAAACAGAAATCAATTCTTGAATTTGAATTTGCTATTTTATGCCATTTGGTCTTT  
AGCTA

>chrX\_78957744\_78957944

ttcactactatgtatTTtatcaaaaaatgaaatcagcatatcaaagagatatctacactcccatg  
tttattgcagcagaattgccaatagccaagatatggaatcaataagttcccaccaacagaataa  
tgggtaaagaaaatgtggtacgtatgtatacaatggaataactatttggcaataaaaaacaaatgcg  
atcat

>chrX\_79693944\_79694144

CATTTTCATCATTTCTTCTgtgtgtatgtatgctgtctgtgtgtatgtatgtatgtatgtatgta  
tgtatataATTTTCAGGACTGTCGGCCATGGGGCATCATTATATTATTTGTATATAATATCTATT  
AAAGAACTTTATTTTGTCTTTTATTATCTTGCAGTTTTTCTGGTTGGTGTATTACTTTATTCAGT  
GATAA

>chrX\_81681744\_81681944

aattcactaaggatggtcttcagctgcatccatggttgctgcaaaggacatgattttattctattt  
tatggctggatagattccatggtgtatattgtgccacatttttttatccagtcaccatcaatgg  
gcatttaggttcattccgtgtctttgctattgtgaaatagtgctgcaataaacatacacatgcatg  
tatct

>chrX\_89378544\_89378744

catactgtacaagtcatttatatgaatagacaaaactacattatgttaatagaaatcaacagtc  
attacctatgggtttcactgtctccctaggtgaggaaactttcaggcgtggtgtaaattgttctat  
gtctaattttgggtggttagatgtgtgtatgtaattgtcaaagcacatcaaacagcactcaa  
gattt

>chrX\_92245944\_92246144

aaattacttagtctcaggtagttcctttatagcaatgtgagaatggaccaatacaGTCCAATTTTC  
GCAGGCTTTACAACAGAGCCTACATTCCAGAATTCAAAAAAGTTAATTGGAGATAAAGATCTGAA  
CTTTATTTAAAAGTCTATACAATTATTAGGACAATATTTAGGATAAATCTTTACAACCTTTGTGAG  
ATATA

>chrX\_95218344\_95218544

ccctgaaatatctgattatTTccctttctccaacgcacagttactctggtaaaggccggaggtc

tcctggggaaggatgggagaaagattcactgcataaattggcagtaatgttgtggcatccttcc  
caaggggaccagcctctccttcaactcaagaggttctggactgtaaactggctcaagcctggaaa  
ttgat

>chrX\_97241944\_97242144

AGTTATCCTCCACAAACCTACATCTACTGCATTCCAAGTATTGATTCAAAAATGTAACACAAACA  
ATGAAATATAAAAAGATCACCTATTTTTTAAAAAGTAAAGTAGAAGatataaaataaatttaaaa  
taaaGGAATtaaaaataaaaatgaaaagaataataaaaatggaataaaaatataaaGATAAT  
AAAAC

>chrX\_101016544\_101016744

TGTGAAACAACAGACATAAATTGAAACCACATCAAGCCATATGCTCATCTTCTTATATATTATGA  
ACATTAACCAATGTCTGTAATACACGTGCATCATTTTTTCCCATTTTATATTTCTTTTATCAG  
CTTTTGCAATGCAAATGTTTCAAATTTTCATTTTATTATTTAAAAGACAATGTGGTTAATTATAAA  
TGTTT

>chrX\_104694544\_104694744

GCTAGCCTCAGCCTCTCAGTTGTCCTCATTGAGCATGTAATAAATAGTTCCAGTGAAGAACTCTG  
GGAGGAAGGAGTACAACCTATTTGTATTGAAGTCTTCAGTATGTATTTCTGGGGATTTTCAAGAG  
TTGATGTTTGCAAGAAAATCAACTTTGAGTAATATAGaataataatctctttcattttagtaaat  
ctcta

>chrX\_109321544\_109321744

tggctctttcttaaaatgtctatgttgtcttttaactcttggatcattttactggctttcttcga  
ttgagtttcaactttctctggagtctcattgagcttcttgccatccagattctgaattctgtgta  
tgtcctttcagacatttcaatctggtaggatccattgctgtggagctagtgtgatccctcggaT  
CATCA

>chrX\_109846144\_109846344

aaggacatgaactcatcatttttatggctgcatagattccatggtgcatatgtgccacctttt  
cttaatccattctatcattggtggacatttgggttgggtcccagctctttgctactgtgaatagtg  
ctgcaataaacatacgtgtacatgtgtctttatagcagcatgtttataatcctttgggtatata  
cccag

>chrX\_119772372\_119772572

actccctattcaataaatggtgctgggataactggctagccgatgcagaaaattgaaactggat  
attcttgtttataatagcaaaagtgggaaatagccattaataaggaatgtttgagttcattatg  
gtacatccatataatggaatattaagcataaaatagagagctTATTTCACTAACCTATACTAAAC  
ACTTC

>chrX\_126125119\_126125319

caggagctgcctctaagcccataaaacagaaagtgctaccagaaagaaatcgacctcttgactc  
cagcgttggtgtttgggtgccccaaaatgatgacctttctcagcaggaagttagccacaaagatta  
tgatgccccatctccctacaatcttgatgataatacatatacaaatattatagaaatcatgcaca  
gattt

>chrX\_126422919\_126423119

tgaagtcaattacataattgacaataaagaataattacagtctggtttgcaaagaccaatcata  
ttggctacttgatcaggattttcattgacgataaacaggcagttgacgaaatgctttcttgatgt  
gtgcctatctatcttcccttgccaattactgtgaccatacctaccttgactttggcaattaagtgt  
tgcca

>chrX\_127231919\_127232119

ctctggccataacttttgcaggatgagatgcaacagcaaaaactagcacAGGCGTCAAGATTAGAA  
GTAAATCCAATACACCTTACATATCTCATCTTTCTTTCTTACATAGCCTCTATTTGACTATGA  
AGGTTTAGATTTTGTTTTGAACATCTTCCCATGAATAATTTAGAGAGTCTTTGTCTTACCGA  
AAAAA

>chrX\_128455919\_128456119

TTTTTTTAttttattattattatactttaagttttagggtagcatgtgcacaatgtgcaggttagt  
tacatatgtatacatgtgccatgctggtgtgctgcaccattaactcTaagtatataagacctta  
ttatctatagtcacatgctgtacattaggtctccagaacttattcgtcttataactgtgagttt  
gtact

>chrX\_136265734\_136265934

tcagcttctgaaggcttcttgcattccttagcacttttcaactgtcttcaaagctagcaaggttgc  
atctttttggccatctttcatagccacatctcccttgacttttttctgcctccctcttccactt  
ttaaggacctcatgattacactggatctacctagataatccaggataatccccccatttaaaga  
ccagt

>chrX\_136805334\_136805534

tagctcctagtcgctcgttcacagccccatttaaaattcccttcaatcaagaagtcttccctgaga  
gttacattgagactgagattaaatccctctcttatacattcctctagcatcTCTTATTTAAGACA  
TTCACTGTTGTAAAAAAGTTTCAAACATATTCAAATGTAAGGAGAACAGTATAATGAGGACCCAC  
TGAAG

>chrX\_137182134\_137182334

gaaagaaaatgaatagaaagcagatatttcacataaatgaaacaaaagtgaacataaatagcta  
cacttagataaaacagactaaatcaaaaatagtaaaaaaaaaaagacaaagaagatcattatag  
ataataatgagatcaatccagcaagaggatataacaattctgaatataatttgcattccaaaactgg  
agcac

>chrX\_138524134\_138524334

tcactccaaaaaaaaatcctgcacctcttagctgttaccccaagcacatcagtcattggccctttc  
cctgcatccctgctaataatctacttttaattctctatagattttcctattctggatatttcatat  
aagtggatcacaaaatagtggtcttttgtgactagcatctttcatttagcataatgtttccaa  
agttA

>chrX\_141528934\_141529134

GTCATGTGGTCCCACTACCCTGTAGGAAACCCTGGGACTGAGGAAAGTGCCCAGACCCATAGGAG  
CCCAGTAAAGGGAGGGAGAATCCACTTAGCAGGAAGGGTCATCCTCATGCCCTGCCCTGTATAAA  
AAAAGGAAGACTGATGAAAAAGCAAATGATCCAACAAAACAAAAGAGAGAAGAAAAGAAA  
AGGAG

>chrX\_143900105\_143900305

gggtaggatatttaattgttctcactacacaacaataaatggtaagtatgtgagatgatgaacatgt  
taattagcttgattgtggtggatatttcacagtgcatatacaaatcatcaagttttacaa  
cttatataaatttttaactatcaactatacttacaacagttggggaaaATAATCCAAATGAG  
AGAGA

>chrX\_146254308\_146254508

gttgaaaaatgtttgttatcagacttaaagtctgtgttgatgtaaatgccagaaaggtataatga  
ggcatgtctgacccccactttccatcatggcatgaactagtctttcaggttaaatttttaaaga  
gccatggctaaggaggaagttcattcagatggttgggggaccttaaaattttatttttggtttaca  
CTAGG

>chrX\_151030344\_151030544  
CACCTGCCCAAAGCTTTCTGGGGCCCTCAGCCATCTGGTCAATTTCTCTGGAGTGCTCAGCCTA  
TCACAACTAACTCATCCCCATTCAGTAGAGAGAGCTGTTGGGGAATCAAATTTGTTTCTtggtta  
agggctttggagccacacagaccaggttcaaactctccactagactcgttattggctctgtgaca  
cagga

>chrX\_151090544\_151090744  
TCGAGGTCACAGAGAGGAGAGGGCTATGGTCTGAGGGGTGGTACTTCAGGTCCGCAGAGGGAGGA  
GTCCCAGGATCTACAGGACCCAAGGTGTGCCACACTTCACGAGGAATGGGGATACCTGTGGCTCA  
GAAAGACGGGACCCACAGAGTCTGGCTGTCCCCTGTTCTTAGCTCAGGGGGGACCAGAGGAGGG  
ATGGC

>chrX\_153488206\_153488406  
TCCCCACTGCTGCTGGGACCTGTTCTCTCCTTTGCCCCCTGTCCCTGCACTGCCAATTTGGA  
CCGCAAGGGTTGCCAGGGAAGGGCACTGGCTGCCTTGTTCAGAGGTCGTAGCACCTAGATTGC  
TCCAGCCCCTTGCACTTGCTGCAGGCCAGAGTGTCCCAAACCCTCCCAGTCTCAGCTGCTCTTC  
CCCAG

>chr13\_29696600\_29696800  
aaccatcagatctcgtgagaactcactcactatcatgagaacagcatgaggataaccatcccat  
gattcagttacctctcactggggccctcccatgacatgtgggaattgtgggaactacaattcaag  
atgagatttgagtggggatacagccaaatcatgtcaGATGGGGAGAGCATTCCACTGGGACCAAG  
TCACT

>chr13\_44212000\_44212200  
TATGGGTTTAATTTGAAATCCATCATTACAAAACCATCCTCATCCGGCAATAGGAAAGACTCCCA  
TTATAATTTTCTGCTGGGAGTCATTAGAAAAAGCCAAAGCAATAGAAGGGAAAAGGGTCCGAGAG  
CACCTCTAACTTACAAAAGTACAACCCACTTTGTTCAACAAATAAAAAGCAGAGCCTGCTTTGTTC  
AACTC

>chr13\_68662799\_68662999  
cccttataaaaccatcagatctcatgatattcactcactatcacaagacagcatggggagaact  
gcccccatgattaattacctcctcctggtcccaccattgacatgtggggattacaattcaagatg  
agactttgggtggggatggagccaaaccatatacaCATGGCTATACAGTGATCCTGAAATTGTCTA  
AGTTA

>chr13\_68845199\_68845399  
aaatctctgtgcaataatggtgattacataataaaaaatcactcttttgcttcaaggttataaata  
atgggaaaaaaggatthtatgtgactagtcttagagtatagagaccctaataatgcttctggtactt  
tgtgatgtgaatattcatattgtttgaccctttccttgcagaaatagcttggtggtttgtttgt  
ctttg

>chr13\_69173599\_69173799  
gtgtggtggctcacacctgtaatcccagcactttcagaggccaaggcgggtggatcatctgaggt  
caggagttcaagaccagcctggccaacatggcgaaaccatgtctctactaaaagtataaaaatta  
gctaggcatggtggtgggcacctgtaaaccagctactcaggaggctgaggcaggagaactgctt  
gaacc

>chr13\_72733799\_72733999  
cttagaacagatcccacaacaagacttatccagcctcaaatgtcaataatgtcaaggttgagaa  
gccctgCTATAGAGTATGAATGCTAGAGTGAGAATCTTTTCCCATCTTCCCTTCCCTCAGAGTG  
TGCACCATAATGCTCTGCAGACAGTAATATATTCAATATTTGGTAATGATCAGCCCTGAAAAC TG

TCTAA

>chr13\_74132799\_74132999

TCTAATTCCTTAGCTCAGAATATGAGGCCtcagtccttagtatccatctttagcttgacttctctgg  
ggtgtttaataactactgtttttgaaactctctcattatcttggtttctagaataaccattctctttt  
gctccctttacctctctgactttccagcttcctgtagtgggcttcatttccctaccgtcctcttc  
ggtgc

>chr13\_83267999\_83268199

AGGACATCCTCACAAGGGCTTTTGGTCACAAAACAATATTACCCAGAAAATCCATACTGGGCAGA  
GGAGTTGGTAGAAATGGCAGTGGCTGCTCAGCCCACGGTATTGGAATTAGAGTTGTGGTAGAATG  
ATATCCATATGAGGAAGCTGCAGTCTACCCTGGGATATCATTGAATAAGTGGAGTAAGGAGATTA  
TCATT

>chr13\_89844799\_89844999

cactgtgacctggccatgtattgtatattttaagactgaatgtaagatcatcgtttttgatattt  
cttcattgctattttaagtttaagatggttattaattgcttcgtttctcttttaggctttata  
gcttgctatgttccaactaagcactactttaactgcattgcacacattttcatatattatcttt  
taatg

>chr13\_98519399\_98519599

aaaaaaaaaagaaTTGCAAAGAATGACATTTGAAACACAGGCTGGGTTTTAATTTAGCTTTCCTT  
TATCACAAAATAATGAAAAGAGACAAGTCCTTGTAATGACTCTCGCCCCTTCCACACACACTCTT  
CCTTCAAGTCACCTCTCATTTAAGACAGGAAAGTCCGCACAGCAAGAGTCTCACCCATATTTGCA  
TGGGG

>chr13\_107789199\_107789399

taagcaaggggataaccagtttcctcaggcaagagaagaaaaggtaactatgatggcaaaagaaga  
ctcaacaggggttggttttaagattctcattttcatcctggtccaaaatctcaagggtctgctca  
tttctaacccttttctagaccacttaataatttgacaaggctgtgaattcaatgtgcTTAAT  
ATAAT

>chr12\_25298533\_25298733

TTTTCATAGCAAATGGAAGGAACCTTAGGAAATATTTTTTCTTCCCTTTTACTAACTATCAAAAA  
TAAAGTCTAGTTTTTTTTAaatgtcacatagctagtcttttcagaggtaggaccagaacctaggc  
ctcctaatttttattctggtaatttttctctaaaactcactgctaTACTAATGCAAGTAACTTAA  
AATGT

>chr12\_39887533\_39887733

AGAAATATTTAAATAAAGAAAAATTCATCTACCAAATTTAATATATACATCATATGCATTATT  
CTATACTGTTATATGAggtgtgtgtgtgtgtgtgtgtgtgtgtgtgtAAAATAAACGGTTAAGGTAAATT  
TTGGATTAAGGCAAAATTTAATCCTATGATTTAGATTGCTTATGAAGATATCATACCTATGAGGG  
TTTAC

>chr12\_40702333\_40702533

ATACTGGGAGTGGTAAACCACCTTATTGCAGCAATTAATGAAAACCAAGAAATCAGATCTTGGA  
ATGCAAAGTGCCACAGTTGGCATAGATGTGAAAGACTGGCCTATCCAAATAAGAGACAAAAGAAA  
GAGAGATCTCGTCTAAATGTGTGGGATTTTGCAGGTATTTCTTTCTATAGAATTTTAAAATTCA  
CTTTT

>chr12\_63792733\_63792933

tagctgaggtgctagtgtgcctggaccactgtcgcagtccaacctagtactgacaccataggt  
ttgaaactggatgtggacaaagtagccaattggatgaacttagagcaatatgggtggtgatcacc

aagtgttggggtgatcagacccaacactaggccttggaggctacgaagtctggcagagtcaaagg  
aatga

>chr12\_68466733\_68466933

cttggctctactgacatttggggccagataaattctttattgtggtgggcccgtcctgtgactgtgg  
gatggtgagtaggtctctacctaacttaactggcagcaaccaagtagtgacaaccaaaaatgtct  
ccagacattgccaagtgtcctctggatgcaaaattgcccctggtaaagaagcactATTATAGATC  
CCAAT

>chr12\_73802733\_73802933

AAATCCTGAGATTTTTGGCTGTGGGAGTGGTAGAAATGCTTCTACCTTTTATTCTGGGTGCAGAT  
GCAGCTATGCAGCTATtttgttttttggtttggtttggtttggtttTGTGAGACAGAgttgccc  
aggctgcagtgcactggtatgatctcggttacggcaacctctgcctcccaggttcaagcattc  
tcatg

>chr12\_83469869\_83470069

GGTCAGATTGTCGCACTGACCTAAACTGAATTTACAGTTTTCCAGGCTTGGGGTATTGTTATTC  
ATCACAATCTACATGCAATCATTTTTAAACAATATTTTTCAATATATATTTGTGTACTCTCTGT  
ATATATGTGTGTTTTAGATTCACAACCAGAAAGATCAAGGGAGTTGAGGCATAGCAGGAACGTAA  
GTAGC

>chr12\_83643669\_83643869

tctcccttttggaatgagagcatttacccaatgcctgtaccctcattgtatcatggaagcaacta  
acttgtttcttattttacaggctcataggcagaagggacttggccttgtctcaggtgagactttg  
tacttggacatttgagttaatgctggaatgagttaagactttgggggaatggttgaaaggcataa  
ttgca

>chr12\_90612269\_90612469

gactggttttgtgtggAGAGAGAGAGAGGAAAAAATGTAGGAAAAAACCTGAATGGCTCTAGAAA  
GCTGTAAAAGGTTTTGTGGAGAAGAGAGCTCCTGATCACCATGAGCTCCTCAGGTTAGTTCATCTA  
CAGACAATTGGGTTGCCTCCAAAaattgggcaagaaagaatcaagagagtgccctgggttccacat  
gtgcc

>chr12\_103488870\_103489070

ctctgttttaagctgccaccaactatcacctggattatggtaatagccccctgattggtcccttc  
cctcatagtctattttcaacacagcagctgaagtgatcccattaaatcgtaagtcaggtcatgtca  
taccctcattggaaacctctagtagccccatcaggttcagaataaagtctagtgtcttatactg  
ctcta

>chr12\_129052847\_129053047

ATCATAGATTTTCATAGCAGCAAGGATGCATTCTCCTGGCTTCACTCCAACAGCtttattattta  
tgctcataccttgttccacaaaggatttttagacaatttacaataCTGTCTCCAATATAGGAAGCC  
AAAACACATTTCAAATAAATAatcatagcaataacttaccctgtacttgccgtggactgggcatt  
attct

>chr12\_130108047\_130108247

ccacttgtaagtgagaacatgtggtacttggttttccattcttcactcaggataatggtctccag  
ttccatctaagttgctgcaaaagacattatttcattactttttatggctgagtagtattccatg  
gtgtgtgtgtgtatgtgtgtatataatatacatatatacacatataatatacatatatacata  
tatat

>chr11\_4545424\_4545624

accagatccttctgaatatctagaaagcctttccaagaagtatgggcacaaacgagcccagaca

gtgaagacaacaaatacctaactgttcaatgcccagatatctaatagatattagcaccaatatca  
ttcaggaaaacatgacctcaccaaatgaactaataaaggcaccagagaccaatcctggagaaaca  
tatgt

>chr11\_20836224\_20836424

atcttctttatccagtcactgttggtgggcacctagattgattctatgtctttgctggttgac  
tagtgctgtaataaacttgtgagctcatgtgtctttttgtagaaagatttgttttgttggat  
atataccagtaaagggattgctgagtcaaatggtagttctgttttaggtttttgagaaatcgc  
caaac

>chr11\_23193824\_23194024

TATGTGCAGGGTCTTAACATTAATTGAGGCAGATCTGAAATTAGAAAAGAATAGCCAGTCTCTG  
TACTGACCTAAATATTAACAGTTTATACAGATCTTatgccagatatattctcaccttctgtttt  
ttcttaatatccatatacattctcaatttctgttctttcccagaaaacttatttgaagccttt  
aacct

>chr11\_24627224\_24627424

tgaattcattgtaaaatgatatccacaatcaagataattaaacatttgtataacttaagatatac  
tctcttaggaaatttcaagtgtaccttacatttttattatcatgcaatatgttaggtctccagaa  
cttatttgtcttataaacttcaattgtgtgccccttgaccagcatatccccatttttttaccctt  
gacct

>chr11\_25022224\_25022424

cagaagccttttctgtaaacaccgggtggcatctcttagtatccctgactgggttagtgtaaaag  
cagcagtcttcccctaagaaggtgcaaagtcctcctttctcagcagtgaggaggcttaggcctct  
gtggttttggagagtcactgctgctaaagagtcatttgggattgtagttactatccttactgaa  
tagat

>chr11\_38843224\_38843424

gtcagtcctgcccctaccggggggtgcctcccagttaggctactcgggggtcagggaccacttga  
ggaggcagtcctccagcagtgctgctgggagaaccactactctcttcaaagctgtcagacagggaca  
tttaagtctgcagaggtttctgctgccttttgtttggctatgcctgcctccagaggtggagtc  
acaga

>chr11\_39197424\_39197624

TCAAAACAATAACTCATACTGGTATAAATTCTGTGAGTAACTTCTAGGTCTACCAAAAATACAAG  
CAATTGTAATCTCATTTGCTGAATAGTTGTTGCAGATAAAAATATTTACTTATAAGATTTGCCTT  
CACTGGGGCAAAGGGACAAGTCTAGAAATAGAGCCTGGCAATAAGACAGatttatttatttatt  
attta

>chr11\_50108824\_50109024

taattgctgttcagcaatatttgtctgttctgcagcctcccctgctgataccagacaaacaggg  
ctgaagtggacctccagcaaacaccaacagacctgcagctgagtgactgactggttgaaggaaa  
actaacaacagaaaagacatccacacaaaacccatctgtacatccatcatcaaagaccaa  
aagta

>chr11\_60328024\_60328224

CAGTGTCAAGAGAACTTCCATCACTACAACATCAGGATCAAGAAGACCTTAGCAGCTACTACCAC  
CATAAACCCCAACAACACTCACTACTGCAACAAACATCCCCACTGTTGCATGctgaggatccatg  
taatctttgtcagtaccaaaccagctgacagagctgcaaagagactgcacagctgtgcactcag  
tgatg

>chr11\_81425152\_81425352



gtagactgaccttttagggatggtgtatattattctgctagaagataggctgtgtttaatattt  
gctgtggcttctagaagcttcaaatttctctagtttcctcatttttgtcaccctgttgtcttta  
gatttccataaaaactcctttttaaaatatagactgtgctgtgcatgtctttcatctgtaatcat  
gttat

>chr11\_88897752\_88897952

ctttttgtatttttagtagagatggggcttcacatgtCTTAAATTGTGAGCTCAGGTTCTATGA  
CTCTATAAAAGTTTATATCATTTGCGGCTGTAACTttcctcctctggtggatgtttttcccatct  
aactcctcctgtaagagcagcctttttacattgccaagtattatgcaaggttttctatttcagctc  
tcctt

>chr11\_91790152\_91790352

TATTGATACAATTTAAGGTATGTGAGGATAATCAAGGGCATAACCATTTTTAGCCTAATATGCCTT  
CATGGAAATTAGTAACAAAGAAATCATTTATTTGTTTCCATTTCTTAATACTTACATATTACTCT  
TTTCTCTCTTTCTTTCTTTGAGTAATACAGTGCATATTTATGCTCAAAAATAAACACATATCCC  
TGTTT

>chr11\_91878952\_91879152

gtgttctttcagtcattgatttttcatgctccttgaagtctcctgctgcagatattcacagctgag  
gaagcagtcacctcttccagtttttgtttgtttgtttgtttggttttgtttgactggctttg  
ggagaaaaagactttcatcagtcagactgcctgggtattcctgtggtctttcaggatttttctat  
ggatg

>chr11\_99399190\_99399390

tctgaaataccatggcagacaacctgagatttttgacaagatctatggaaaaccacagtaagtta  
caactgcatatgcagtcaccaaagagctgagatcttgagaaactttatctttcacaaatgcaca  
cgtacaaatgggacatttctccatttattaaggaagcttcagtgttttcacTTTGAGAACCAGAG  
AAGCT

>chr11\_111137590\_111137790

CTTACCCACCCTATTGCCCTCTTACATTATGATTCCAGCCCAAGGATGGGTGAGCTTTGGAGTG  
GTCACTCTGCTTCAGGCCCTCCTGCTCAGCTCTCATGTCACCCTCCAGATTTCTGTGTGATGGG  
TGGCCCAATTATGACTTTTGCTCCCTCTCGGGAACACATTTGTCTCCCAATCAGCCCCACAGT  
GTGCC

>chr10\_9415794\_9415994

CAGGAATAAAAGGAAGAAAGACAAAAAACAGCTAAGACTTAGCCTCTGCATTTTCTACTCTGTA  
GCTGTTTCAGAGACTAACCAATATAGACAGTACCATTTCAAGTTAGATCTTTTGGATTGAAAATT  
TAGATCATATTGATAGCTAAATAACCCCAAGTATTCAATATGCTACCAGAAGACAAAAGTGTAC  
AGAAT

>chr10\_15551794\_15551994

atggatccaggtcctcacagaggaagatgacgtgaggacacatgggaacacgggtgtgatgaggg  
agtatccatgtactgcgtttacaagccaaggaacacctgagactcccagaagctgggagagatgc  
ctggaacagatgcttccctagtgcttcagagagaacacagctccccagtaccttgattttgg  
gcttc

>chr10\_44979594\_44979794

gggctctgttctgttccattgatctatatctctgttttggtagcactatgctgttttgggta  
ctgtaaccttgtagtatagtttgaagtcaggtagtgatgcctccagctttgttcttttggctt  
aggattgacttggcagatgcgggctcttttttggttccatatgaactttaagtagttttttccaa  
ttctg

>chr10\_57733594\_57733794

tgttgtgggtattgacagccaggcttctaaacctcttaaaactcccccaactctagtgccaacttg  
gacaatatcttttatgcactcctttttagttatccccacctgcccagttctcttattaggctga  
gacatttttaactaaattatctgctcccctgactattcctgggctacagccactcctcattgccac  
ccttt

>chr10\_58136594\_58136794

ttggtcaggctgggtctcgaagtcctgacctcaggtgatccgcccgcctcagcctcccaaagtgc  
gggattacagacatgagccaccgcaccagccttcaatttcttgaggatctgtagtaatttatcc  
tctcttatttctgttagtctctttgtctgtctctctctctctctctctctctctctctctctc  
tgtct

>chr10\_59683394\_59683594

gtgtatatatgtatatatgtgtgtgtatatatgtgtgtgtgtgtgtatatatatatgt  
gtctatccccAAAAGATCATCAATTCTAAGATGATAACATCATATACTGTTGAAAACTCTTTTA  
AATGAACTGTAACAGCAGTAATTGTGTTTCTCTGGGTCAACTGCATGGCAAATGTTGCGTGAATC  
AATAC

>chr10\_65919194\_65919394

tcggtggaacagaggaatctctggagcaatatcttccaatttcttgactgaggagtatatgtttg  
ccttccagagctctaggacctaaagctgggagaaggtagctggagttgggtagactcggggtttg  
ttttagatagtcaggcaatcctctttatttccaatgtagttctttactaccatcttatctgtgg  
ctaag

>chr10\_77905994\_77906194

gggtatccttgttgactttctgtctcggtgatctgtctaagtgtgacagtggggtgttaaagtct  
cccattattaatgtgtgggagtctaagtctctttgttaggtcactcaggacttgctatatgaatct  
gggtgctcctgtattgggtgcatatatatttaggatagttagctcttcttggttgaattgatccct  
ttacc

>chr10\_83204420\_83204620

atthttggctgaactaagggacaaaaaatcccgcataatgtgatcctattcatttttcttttgt  
tgcctttgcttgtctttctgtgcctgggttatttctacttagcataatgatcttcagttccacca  
tgtcgcaaatgacaggatttcatthttgtttttatggctgaaaaataaggactccattgtgtgtaag  
tacca

>chr10\_84686620\_84686820

TTGGACATCCATTGAACATGTCTCAACTGCACTGTGTCTCTTTGTCTTTATTTTCTTTATCTTTG  
GGTCATTCCCCCAATTCTAACTGACCTTTGTTATCCTTCTGGTCTCCAGTTTAGTTTCTGGGAA  
GGGCTCTCCCTGGCTCAGTTCCTCAGCACCATCACTACTTGAGCAGAGCTTTTCCACCTGAAGTG  
CTCAA

>chr10\_86460820\_86461020

ggacagacacttcatctagggttttcttatttaatcttcctcagatccttggaggggtggcatttt  
atctctattttgctgacaaaggaacaggttcagagctaagtaacatgctaaagggtataactgctt  
gggcctggagcccagatgcatatgactccaagtccagcccCATGAGTACAGGATGTGAGGTAGGC  
CCCTT

>chr10\_87312220\_87312420

caagtaatcaaaactatgtactattggtaaggatcaaacatgtagatcaatgcaacagagtagtg  
tccagaaattaaccacacaagtggtgccaatttatattcacaagctacaaaagcaattcaat  
gaatacaagtatccttttcaacaaatgatgatagaacaatttgacatacacagacaagaaaataa

acctt  
>chr10\_90156820\_90157020  
cagaagatcaataaagaaatagaggacttgaacaacactataaaccaattaaacctgacatgcat  
atacaaaaatatttctactcaataacagcagaataatacattcttctcaagtgtacatgagacattc  
tccaggatgaagcctgtggttaggccataaaaagaagtttcagtaaatttaaagaattaaaatga  
taaaa  
>chr10\_96618210\_96618410  
gaaatcccccacactcttgtgcttcccagggtgaggcaatgacctgccctgctttggctcacctc  
catgggctgcatccactgtccaacaagtcccaatgagatgaaccaggtagttcagttggaaatgc  
agaaatcacccatcttctggatcgatcatgctgggagctgcagaccatagctggtccattttggc  
catct  
>chr10\_96692610\_96692810  
gaagtagtaccagaggaaattcttctattcttaactcattttatggggccagcattactctaata  
ctcaaatcagacaaggacattgtaagaaagcaaaactatataatcagtatatctaatgaaaatagg  
tgcaaacctcaataaaagattagcaaattgcatccaatcgtgtagaaaaactgtatacaccataa  
ctaag  
>chr17\_11621475\_11621675  
gagccactacaccggcctgacaacatacaaactcccgtatctggcttctttcacttagcataat  
gtttttgaggttcgtccatcctgtagcatgtttgggtacttcattcctttatattgctgaagagta  
ttacactctacgaattaccacattttgcttatccattcactggtgatagatatttggtgtgttc  
tagct  
>chr17\_15070675\_15070875  
AAGTATATTGTGGTTGCTAATTATCAATTTTTTCTAGAAATTGTTCAAAAATATTTTAGTATAT  
ACGAGGAATGtcttatgggtcttttttttcaaactgttaaagcagtcattattattaatctattt  
ttaagactgaaccatttctgggtttctgaaaaaacaacaacaaaaaccctacctctcaaggt  
agagt  
>chr17\_59355018\_59355218  
tataaccaattaaatgggcaaaggatctgaatagacagttcttcaaagaagatacacaatgg  
ccaataatcacgtgaaaagatgcccaacatcattaacatcagagatattcaactcaaaaccaca  
agcagatactacttggcacccactaggatgactatgatcaaaaagatagataataacaagtgtg  
ataat  
>chr17\_72067805\_72068005  
ataattcacatacatacaatttgccacttaaagcgtgcaattcagtcaggcatggtggctcac  
acctgtaatcccagcactttgggaggccgaggtgggcagatcacttgagggtcaggagttcgagac  
cagttggccaacatggcgaaacccatctctactaaaaatgtacaaaaattacccgggcatggag  
gtggg  
>chr16\_16999099\_16999299  
catcttccgccataattgaaagtttctgaggcctctccacaccatgaggaactgtgagtcaatt  
aaacctcttttctttataaattaccagtcctcagatagttctttatagcagtggtggaaatgaact  
aatacaTGTCCTTACCTTCTACCACATATAGAACCAACAACAACAAAAGAGGAAAGTACTTT  
GTTAG  
>chr16\_25598099\_25598299  
AGGTCTATTTATGTTACCATTTGTATTGCTGGCATGTAGCTCCTTTTCTGCAATAACACAGCTG  
CCTCCTTCCAGTACAATTTTGTCCCGTCTCCTGTATGCCCAAGAACCATACAAACAAGTAAAGA

TGTACGGCAGAATTTGCAGTCAGAGCCTTTTGAAATTCCAAGTGAATTCCTCCAGCTGAAAATC  
CCAAC

>chr16\_26182299\_26182499

tggcattgctaagcattttacacttaattcatatcataggaagaacccaaatggggtgcagttgt  
gcccatttcatagattaaaaatacctcaagcacagtaagttaataacttctctcccaggatca  
gactgtgatatagcctggatttaaacctgtatgacaccattaaagcctgtatgacaccatagtg  
gagct

>chr16\_61873699\_61873899

ctagatctgaaatagctcacagttcaaagatgaggcaAGTGTGAGCAACAGCCGCTAAAAGGCA  
AATTTATCTCATAACATTTTGGACCTTGCTATTGTGTCTCACTTCACTCCGTTATAACAATTATC  
ACACCAAATTTGTTTTCTATATGTGCTTTTGTTCCTAATTTTGCATCTACCTTGCCCTGCCCTC  
TTTGT

>chr15\_24044107\_24044307

tgttatttttcacaaaaatagacaaaaatctaaaatttgtatggaaccacaaatgacctcaat  
acccaaagcaatggtgagcaaaaagaacaaggctggagacatcatacaaccggatttcaaatat  
gtacaaagctttagtaatcaaaaacaatggcactggccaaaaaacagaaacatcaatcaatgg  
aacag

>chr15\_32525908\_32526108

gcttctgggtgctgcttgcacccctgaagtgtggccgcatcactccaatcaccatttctctcat  
cacattgccttctcctaccataatcaaagctacttctgcatccctttataaggacacttgcaa  
ttatatttcaggcactctggacaatctcagacaatctccccatcttttaaccacatgtgcaatat  
ccctt

>chr15\_34002908\_34003108

agtgttctccactggttgcattttgcatacctacaggcttaaacactacatggaaactgccaagagt  
tatggcttgcatttctcaaagtgagcccaagtttagctgggcccatttgagccacagctaga  
ggttgagcagccaggatataatggggagcaatatcatgaggctgcctgggctggcccacaagtt  
aattc

>chr15\_88743996\_88744196

gggagaacagactaatacaACCACCAAGCTGCAGCCCTCCCTCCAAGCCTACTGGAAGCGCCTTA  
GCAATATGACAGGGTCTCTATCACAGGCTCTGATTGCCACTTCAATGAGATGCTGAAAATCTGGG  
ACAAGAGCTCTGCCCAAATCCCAGCTGCTCAGCTAGGCTCTAACAATGCAGCGAGCACACCATCA  
TCTTT

>chr15\_94705596\_94705796

gtttttatctcatcaggctgttttgaagcataaataaataagcagatgtTCACATATCCAATACA  
TGCGTAGTATAGACATAAATACTACATGTGCAAGATCTGTCAGAGTAGATGAATGTGAATTCAGGT  
GTAGTTTCTGCTTGGGGTGAAGGAACGTTGGgaggctataactgtttcatgggaaaaaacacaggc  
aatgt

>chr14\_28076160\_28076360

ctccaaccaccttgggcacataccatcaagacctcctgaggctgtgtgatgggcacatctttaac  
cttggcaaaataaactttttaaattgattgagaccctctcaaatacttttgggtttacaAATtg  
gtaaccacagaagaattctgagtagagggtgtccctgactttgaacaaatctcctattggtacttg  
gtacc

>chr14\_44848650\_44848850

accattcaaatcccaagttcctcacaggaacaggaggtgccagactcctcctgctgaaaatggt

gtgaaagttgtaatgctccacctcagtgggcaggctggctggagtttctctggggaaccctccc  
atctggctgtctcaTCcctccctctaaggaagtacatctaactgccattagattaggatacagat  
gaaga

>chr14\_48350050\_48350250

TGGGGCTGGTTCATAATTGGAACACAAAAATGATCCAGATTTTCATTTAAGAACAAGTACAAATA  
AATAGGAGCAAAGCTTTTACATATAATGGTTTAAATGGCCTGATAGAATTTCTAATCACATTTTA  
TACTATTTTACTATAACATGTATTAAAGGAGACAGCACTAAAATACATTATATCAACAATAATAA  
CTggt

>chr14\_88260047\_88260247

ACAGCCTCCTGACAAATTGGCTGTAGCTCTTAGTCCCTCAACGACTACTGTGCCTGCCCCCTCA  
CTTAGCCTGCTTCTCTCACTTACTGCCAATTCAGACCCGTTAAGACAATGGATTACCACAATGT  
TCATTTTACAATAACATACACAAGGCATGAATTCACAGTAACCAAGCCTCAGTACACTCTCAAAC  
AGCTA

>chr14\_89393047\_89393247

atctgatgattttataaatgggagttctcctgcacgaggcctcttgccctgccaccatgtaagatg  
tgattttgctcctcattcaccttctgccatgaccgtgaggcctccccagccatgtggaactgtga  
gtccattaaacctctttcttttataaattactcagtcttgggcatgtctttattagaacatgag  
aacag

>chr14\_99479047\_99479247

CCAAGAGGCTGGAGCCAGCCATCAGGAGCAGGGAGGGCACAGACCAGGAGCCTGGGATCAGCCC  
CAAGGATCCGGTGGCGGTCTCCATGATGACTGACCTAGAGGTATGCTCAGCCAGAGTGGGACTAG  
CAATGGAGCCGGGGAGGCAGCAATGGCCCTGACTGGGAGGCAGAGCCGAGCACAGGGCACATGGT  
CACTG

>chr19\_28388560\_28388760

TTAAAAAGTTAATAAACCCCTAGTAAGGTCCAACCTATTCCATGTTTAGACATAGTCAAAAAAAt  
taagcaactatattatgtgcccagaccctgtgctaggcattgaggggtcaaaagaaataagcaca  
gcttctgttcccttagaacttagatCAAACTAGAAGTATTCagggatttgtcaaaggtctcacag  
ctaat

>chr19\_33218560\_33218760

ttcatttttatttttatttttattttctttttgagacagagtctcactctgttaccaggccgga  
gtgagctgggtgcaatttccggctcactgcaacctccacctcccaggttcaagtgattctcttggcg  
tagcctcctgagtagctgggattacgggcatgtaccaccacaccggctaattttgtattttag  
tagag

>chr19\_36992360\_36992560

tttatatactttcatgttttcatgttactaataaatgactttttccttcagcttgaagaattctc  
tttagcatttctttagggcagatataggagtgttaaacaccttcaacttttgtttgtctgagaa  
agtcttaatttctccttcatttttgaatacaggttatctgagatagtagtattctcacatggcagt  
tgttt

>chr18\_6937400\_6937600

gcgggcgatcacgaggtcaggagatcgagactatcctggctaacatgggtgaaaccctgtctcta  
ctaaaaataaataaataaataaaaaaggcgctgtagctccagctactccggaggctgaggcagg  
agaatggcgtgaaccgggaggcgagcttgcagtgagccgagatcgcgccactgcactccagcc  
tgggt

>chr18\_7865600\_7865800

atccccacatcaatgttcatcagggatattggcctgaaatccccccccctgtgtgtctctgcg  
aggttttggtatcaggatgatgccggcctcataaaatgagttacggaggattccttctttttctc  
ttgtttggaattatccccagaaagaataccagctccttttggtacttctgatagaattcggctgt  
gaatc

>chr18\_14328600\_14328800

gtcctgtctccatcgaacagcctgtgctcttatgtgtgatagaggaaatgacctctgggtgggac  
ttacattaaatgagtcccaacccttatattaaatgagaaacagaagtcaaaagtttgcaaattt  
gcagcccggacatgtgggtcaaaaagaaaagctgattttcagggggaaaattgaggaaggcttcag  
aaact

>chr18\_26420402\_26420602

gtgtcactttatctcctcagcatttagaactctgattaaattatagaaaagctcaataaatgtgt  
gtagaataagtgaTGTC AATGATAGTAGCACCATCGATTGTCAAATTGAACCTCTCAGTAGACA  
AGGCTTAAATAATTCAATATTTCTGTACTAAAAATCCCCCGTCACAACAATAAATCCTGTTATTTT  
AAACT

>chr18\_26877802\_26878002

gatggtgagtggtgccactttcactccttgactcctggacctgaatcctggctatgggagaaa  
gagtaccatatattggacgctgattcagagtatacacatcctcctggagaactttgccctagccc  
tgcaaagtattgtcacctaattggcattgtaattgtgacttcaaaaggccacttcaccattttat  
caagg

>chr18\_50855202\_50855402

tgtgtgagattacaggcatgagccactgcacctggccATGACTgcagttctttctgacagtaatat  
gaaatactcagaccattggttttatgaaacttctccttgttcatgatggtaaagctttgttgtct  
acatttagggaacagatgtatccatttctgttacaaaaggagagtgtagacattcagtagacattaa  
aagcc

>chr18\_59018820\_59019020

TTAGTTTGCCTCTATGTTACTTTTGGACAGCAAAAATAACTGCAAAGTCTAATTAATAAAAAAAAAA  
ACAATTTTCAGGTGATATGGGGATAGTTTTAAAaagcagcacctttgggatgcctaaatctgtgt  
acaagctctgtgatattagccaggtaacttgatgtctttctttaaaatatattcctactacctgt  
gtcat

>chr18\_60376220\_60376420

TCTACAATGGGGCGGAAAAAAGAAAAGAATATCCATGCTGCTTCTTCACGGTATAATTAATGAAT  
GTAAGTATGGAGGAATCATTATCTGGAGAATACTTTTCTCTTTTTAGTCACGGAAGAATCAGAAT  
AAATGTTTTGGGATGGCGTAGGAAAATAGATTTTTGTTAGATAGGAATCttttttatcctttgtt  
ttttt

>chr18\_72556812\_72557012

CATCCTTGATGCGTCTGCCCTAAATAAGCTGAAGAGAAATCAGCCTAAGAAGAGACTAAGGGCAC  
ATAGGCATCCAATAATGATTGAAAAGCAAGTTCTGAAAGTGAATACCAGAAGGAAGAAGAGCC  
AGGTGATCCTGATTGATGATTCCGGAGTAAAGCGTGTGGCTCAGGCCATCTGTGACCCACATAAA  
GAGAG

>chr22\_16387400\_16387600

acctaataatgcatttctcagaatgcatccccattgttaagtgatgcatCCTGGGCTTTGTGCAT  
TAAAAAATGCCAGAACACTCCATACTTAGTGCATAGACTTTATCAAATGTTGAATAAAAACAGA  
AACAAAAAGGAGACAATCCTACAATGAAAAGGAGACACTCATGTCTACCCTAGTGATTCACTGTA  
CGTGG

>chr22\_35483000\_35483200

taggtcttagtcctacactccttctaatttgctgtgtaaccttaccattaatctctctgggtctc  
agttttctcatctgtattggaggttagcagtgctagctctgcctTCAGGCATGCAATATGCCAGAA  
CTACAGACAACAGCCCACAGGATGCAAAAGTGCTTTGCCATCTTAAAAATGCCAGATCACTCAGA  
GCCTA

>chr20\_53526193\_53526393

cctcctcttcacaggttcaagcgattctcttgcctcagcctcttgagtagctgggaccacagaca  
tgcgccaatacacctgcctaatttttgtatTTTTATAGAGATGGGGTTTAGCCATGTTGCTCA  
ggctggtctcaaactcctgagcgcgaaagcaacctgcccacctggcttcccaaagtgctggtatt  
acagg

>chr7\_19297475\_19297675

aatcattaataaaaaattctatctaacaaaatagccctggaccagaaagattctcagacaggttc  
taccagacctacaaagtacagctggtaccagttctactgaaattatTTTTCTAAAAAATTAGG  
TAGAGAGGCTCCTCCCTAACTCATTTATAAAGCCAAGATCTCCCTTACACTAAAATCTGGCAA  
GACAC

>chr7\_28409875\_28410075

tgaagccaggcctctaccactcactgctgagctgtgagttctgggaagaaatactcaacatctct  
ctgcctcattttgtcatttgtaaagtgagaaaatacagagttgctgagtgaaatgaaatct  
tgtatgtgaaagagcttggttaattataaaacacctcataaaggtgaggtgttTGGGAGGATAAAA  
GTGAC

>chr7\_37875675\_37875875

ttctaattaatgaatatgatacactTTTTGGTTTCTTTAATTTTTTCAGCAATACTTTGTTGT  
TTTCAGCAATAAGATATATTTCTTTTTAAATTTATGACATTTTTATCTTTTGATGGTAT  
TGTAAATTTAAAGTTAATTTATTTCCAAACCTTCGATGCTAGTTTATGGTATACAATCAATT  
TTTTA

>chr7\_46683475\_46683675

ttagcatatTTAGTCTATTTACATTTGATGTAACATAGATAAATCTTTTATTCTCTGCTCTTT  
TGACATTTCTGGTTTTCTTTCTGCTTTAGTTTTGTAACATGTCATTCTGATTTATTTAAATT  
GTTTTAAATTGATTTATTTGTATAAATTTTACTGGTAGCTTTAATTTGTAATCTATATCGACT  
TGAGA

>chr7\_48928854\_48929054

CCAACACCATATGAAGGAGCCATTTTCGTTATGCAAAGAATACAATCTGAAATGGCTTAAGGGGAC  
TTGATTTGGCTAGGAGCTGCCCATGGCAAGCAAAACACATGGAATATGAAGATATGGAACCTGCTAA  
GAGGACCCCCAGACACGACTTTATGcagaggctccttcttagctgtgaaggatatgttcaaaaa  
ccagc

>chr7\_49732854\_49733054

tgtgtctttaagtgtTTTTTgacgtcactgtttcagttttgttccttggaaattcaatttgctgc  
atattttggttctccttttctgcgttttatggTTTTTAAAAATTTTTCTTTGTTCTTTTTAT  
TTGAAAATGTTTTATTTGCTTACTCTTCTCATTTCTGCTCTCCATCACCTGCTAGGATTTTA  
GTAAG

>chr7\_49970854\_49971054

gaaaacgtggaagctttggaactaggtaacgggcagaggttgggacagtttgaggggctcagaag  
aagacaagaaaatgtgggaaagtTTGGAACCTTTCTAGAGATGTATTGAATAGTTTTGCCAAAAT  
TCTGATAGCAATATGGACAATGAAGTCCAGGTTGAGGTGGTCTCAAATGGAAATGAGGAGCTTGT

tggaa

>chr7\_56554506\_56554706

GATTTGATTTGAGGTGATTTGAGGGAGCTGGAGCAGCGGTAGATCCTGACCAGCACTCACCTGGA  
ACGCTTGTGATATGTAAAGATAACACCCACTCTCTTTATGAGGTGTGATTTTTTTTTGTTCTAAT  
TATTCCTCTGGGCCTTCTCTCCAGTTTTGTGCTATGTACTAACATGCAATACAAATACTGATGA  
AAACA

>chr7\_83412664\_83412864

atgtgtgtatgtatgtgcatgtgtgtgtgtaCACCATTTTTTCAACAGATTGAAAAATCATAGTAA  
AAGGGTACACTTGGGTTTTGATCTCAAATGATTACTTAATCTTAGGCCCTAAATTCCAGAAGATTA  
CTCCTGAACTGTAATAATTGTAAACCAAAGAGCTCTGTGTTTTTCTCAATATGATTTAAAAA  
CT  
CCAAA

>chr7\_88649864\_88650064

ggcttaaactctatTTTTgtaaccttgagctttctggatgtggatatacacctttccaagacttg  
gaagttttcagctattatTTcatttaataggttttctataccttttcacttattttcttgtttag  
gaattcccataatgtgcatatTTgtttgcttaatgggtgtcccataaatcctgtaggctttctttg  
ttttt

>chr7\_122823564\_122823764

AAGGTTGCCTATTTGCTCCGCCCTTCAAATATTGCTTTGTCATTCAAGAATCAACACTTAGATTG  
TGCATTTGGACTTCTCCCCCTCTTGCCCCCTGCTCtggtccatgaaccagcagcgtcagcataat  
ctgggcacttgtgagaaatgtaggacatcaagcccttcccagacacactgaatcaatcagcatt  
ttcag

>chr7\_141939726\_141939926

TCACAGTAAACATTAGCCCATGGGTCCTCTTGTCTCATAGAACCACAGAGAAAAGTAAAAATAA  
GGAATACATCTTTTATTTATCTCCACATTTAATATGAAGTTGTGAGTAGAGGAGGTGAAGAAGA  
AAAAGAGTTACATTCTCATAGTCACTAGGAGAGAATCTGACCTCAGAAACCCCTGAAGGATGAGA  
GATGA

>chr7\_144349267\_144349467

ccttatccttcacctatgggtgtgcaactaccagcagaagacaatggacctggctctcactgctt  
gggcaaaggggtaacaaactagggcaaaggggaCTAATGTTATGACACATCTCTCTCAGAAAATC  
TGATGTGTGAGTTCAGAATAAAATTAATAGAGACAAAATTTGGAGAAAAAATGCAAACCCTGTC  
CTTTA

>chr7\_152393667\_152393867

gggttgatttctaaatatataaagaactcctacaattcaatagcaaagcaaaaacagcaaataac  
ctggttttacaaagtatatgggacatgaactcaaataTGAAGAAAttttttttttttttttgata  
cgaagttttgctcttgtcgcccaggctggagtgcaatggcagatctcggctcactgcaactcca  
gcctG

>chr7\_152973067\_152973267

tacaaatatatTTaaagaactgaaggaaataatgtatgatgacaatgcttaatacaatagagaat  
atcaatagccagaaattataaaagaaaacaaataaaaaattcagtatttgaaatgtacaatgact  
gaaatgaagaattcacaatgggctcaacaattgattacaatctatttcaactgacagaagaag  
aatta

>chr6\_50144641\_50144841

tcatattcccaccaacagtgtataagcattcacttttctctgcagcctcaccagcataagttggt  
ttttgacttttacaaaatagccattctgactggcatgagattgtatttctcactggggttttaattc



atatttctctgatgattagtgatgctgagcatttgttcatatgtttggttgctgcttgatgtct  
tcttt

>chr6\_65712679\_65712879

tttattagttcccccataataactttttataattttcttatgcctgtctttactgcaatctctaaa  
cataaattgtaaagatttcatggacaattatcacttccccaatcaatatacctagtgatttcctat  
gcctgtctttacttcaatctcttaatcctgtcagctgaggaggatgtatatcgcctcaggacct  
gtaat

>chr6\_72558279\_72558479

CTCTGGTACATTATAGGTTAGAATGGGAAAAGTCACATGGGGAGAAGTGATATAAAATACAGTGTA  
ACAAGGGCTTTAATAGATGAAAAAATAAAGAAGATCGGGGGGACCACTAACTCTGTCCCAGGT  
AGTCAAGGGGAATTTTCATAAAGGCAGAGAAAAAATAAAGCTGCATTTTGAAGAGAGAATAGATTT  
TTTTTC

>chr6\_78519481\_78519681

ACCAAATCTAAATAATCATAATATTGCATGTGAAGTTATCAGATGAAATAGaatatctgagacat  
gcttatattgaaaaaaaaatcattgtttatgtgaaatttaattatgtgtttcttgattttta  
atgtgtaagtctagcagctctaGTTGTGTGGCTCAGTGAGATTTTTAGATTTCTTTACAGTCTA  
TGCTA

>chr6\_87011281\_87011481

attagttttttctaattctgtgaaaaagtcaatggtagcttgatggagatgacatggaatctat  
aaattaccttgggcagtatggccattttcacgatattgattcttcctacccttgaacatgaaata  
tctttccacttgtttggtgcccctctcttatttccttgagcagtggtttgtagctctctttgaagag  
gttct

>chr6\_91656479\_91656679

ATTATTAATTTCAATGTAATTTCAATGATACATTATCTAATAGCTATGACTATTTATGACCCACA  
CTATTCTAATGGGTATTGAGCACATTTTGATGAAATATACTGTATACCCTGAAAGTGGTCTTTTG  
TCCTGTTGTGGGATAGCCATCTATGACAGGCTGGAATTAGCTTGGGATTTTTGTAGGCACTTTA  
CCTGT

>chr6\_102762707\_102762907

CTTTGATAATAAATTTAATGTAGATATTTCTCATCTTAACTAATGTATTAAACCTTTGACATTTT  
TTCAATAAATATTATAAAATCTGCATTTAGTATTTGATACAATAATTACAATGTTTTTTGATTTA  
GTGGTATTGTTATTTGATTCCATGTTCAAATAATATGCTAAAGTGTTTTAAAAAACATTTGGAAT  
GTGTT

>chr6\_104343507\_104343707

atagcaagtattgaaattttttagagaaaaacttttagagtagctattatgatcatgcaaattaggc  
aaaagaaacttcattaataatgaatcaaaagtgactacattttaacggagaaatagaaaacatta  
aaaagaaccaagtaaattaagaactgaaaaatgcatctcaaacacacaaataacaacaccaga  
taagc

>chr6\_113354307\_113354507

ATTGAGCTTGAAAGATCAACTTGCAGTTGTTTCAAATCTAGCCACAAAGCCGTATTTGTTGATTC  
TGTGCTCTCTTGCTCTCTTTCTCTCTCACGCACACATAAACACAAGTTCCTTTAATCTATTCTTA  
TTTTCCACTTACTGCCTTTGCCTTAAAGTTTTGAAGAGTTCTACATATTATTTTCTAATGAGTTA  
CCAAA

>chr6\_116069307\_116069507

aaagtggcagaaaggagaagtgccaacaggggaaatgccagatgcttataaaataatcagatctt

gtgagacttactcattatcacaggaacagcatgggggaaactcccatgatccaactacctccacc  
tgggtcccacccttgacagatggggattattacaattcaaggtgagatttgggtggggacacagag  
ccaaa

>chr6\_116197707\_116197907

CAATCATGCCAGTTATAGTCACACTATAAGGGAATAAAAAAGAGGAAAGGAATCAAACAAGCATA  
CAGCACATATGCAAACCATTAGGATATTTCTTTTACATCTAATTGTTTCAGGATTGTACCAATG  
CATCCATATTAATAATTATAATGTTAATAGGTTGTCTTTTACCTAGAGTAAAATAGCCAAGAAAAG  
ATGTG

>chr6\_132758507\_132758707

TAGAGCTACAGTTTAATATAGACATTGATTTATCTTAATGCCAAGGTGAGTCTTAAAGGGAAATT  
AAGGTAGTCAGGCTCATTCAAGACTATTAAGGCTAGAATGGCCACTGAGGGGGAAAAAAGAAAA  
TTGATTTGGAAGGAGATTTTAAGAATAAACTAAAGAAATGTTTTGAAAGATGAAAtgtctcagtc  
cattt

>chr6\_163493210\_163493410

ttgatggaaaatcctcaacaaaatactagcaaaactgaattcaacaacacattaaaaagatcattc  
atcatgaccaagtgagatttatcccagggatgcaaggatgttacgatatatgcaaagcaatcaat  
gttatacagcatgtcaacatcatcaacatgatgaatgaaggacaaaaagcctatgatcctttcaat  
ttgtc

>chr6\_164645210\_164645410

aaaatcaaccacagtgaggtaacatggtgcgctcttatttgcaaaaattaatatctgactgca  
acaactatcgttgaggtttgcagtggaactgtcattcaatgcttgtaagaatataaatttgaaac  
aagtatTTTgaagttcaatatggcatatTTtagtaaagtttaaaaaatacacatcctctgattgag  
tcatt

>chr5\_18718843\_18719043

TTCACATCCACAAATAATGCTTCTGTGGGATGTTATACAGGAATGGAAAATAACCTTGTATGAG  
GTGTCACATACCTCAATGGCCTTTTTTLAGAATAGGATTTTGTCTGTAATTTAATGAAAGGTCACT  
TGTGACCTGGGTGTGCAATCTCCGCTCTTCACATGATGAACCTCTTTCTGAAGCTATGTCTGTTT  
AGTTG

>chr5\_19168843\_19169043

TCCACAGTCAGTCTCTTTAACTTAATCCAATTTTATTTAAAATGCATTTAGAATTCAGACGT  
CTGCTATATTATATCTGGAGAGTCATCAGTGTATTCTTCACATAGGAAAATCGTGCCTTTTTTTC  
TCACATTCAGTTGTCTCAAGATACAACCTGCAAAGTAAACAGTTTCAGATATTGCGTGTTAACTTT  
TCCAA

>chr5\_20503843\_20504043

ATAGGCAAGAGAAAGAGTTATggccaggtgcggtggctcacgcctgtaatgtcatcattttggga  
ggctgaggcggtggattatctgagctcatgagttcaagaccagcctgggcaacagggcgaaacc  
ctgcctctactaaaaatataaaaattagccaggtgtgggtggcagggcctgtagtcccagctact  
cagga

>chr5\_22851243\_22851443

TGTACTGTAGTAAGAACTTAATACATATCATTCCGTGTGTGGAAGAAATGACTCACACTCCCTCC  
CCCTCCCCCAACAATAATGCAGCTTTCTCTTTTTTGTAGGAATTATCTAAAATGATCACATCAC  
TAAGCAGATCAGTGAGAGGAGTGAGTTGAGTAGAAAATAAAAAAGCATTTCGTGGCTTAAAACT  
TCCCC

>chr5\_25025443\_25025643

gtgctggaattacagggcgtgagccaccgcgcccggccccagttttgatttcttttagagtggtgaa  
ggagaatttgttccatgcctcttttctagatctagttatttattggcattctatagctttcttt  
ggattgtagatctttgacttcatcttcacaaggcattctccctgtgtgaatatctatgtgcaaat  
attct

>chr5\_25123643\_25123843

CATTTACATTTGTATGCCTCATATATGTTATTTTCATATTGCTATATTTTCCTGTACCCTATTATT  
TTCTGGaaaaatttaaatacaatttttaaatttaataatCTTAATCACTGGTTTTGCTTTTTGTT  
TAGGTGATCAGATAATTTTAAGACAAAATTATAAGAATATATACATTATATTTGGAAAAGTTATTG  
CTTTC

>chr5\_32876843\_32877043

aaaccatcccgaacccttactcccacccatccgcggaataattgtcttccatgaaactggtc  
cctggtgcaaaaagggttgagaactgctgctctagaactctctgttttgcattttacttctgtga  
gaactttcttttagcttccacttatgagtgagaacgtgggtgtttagctttctgtttctggcttat  
tttac

>chr5\_34370843\_34371043

GAAAAGTCAATAAAAAGGACTTCTCTTCTTTAGTGTCTTAGTACTCTTCTTTCTTAATACCTAT  
TTATTGTTCTTTAGTTTGAATGCAAAGTTTAAATGATCCATACATTTTAGGCATTTAATTTAATAA  
AAAAAGAAACGTAGGATCTTAAAAAATGACTAATGACATCTTAAAAATACTCTTAATAAACTAGA  
TTGCC

>chr5\_35974443\_35974643

attggcagaataatcatgctgcttctctgaagtgtggagtgtgaagctagcatgggttgaaagtcc  
agggtggaagtcactaaaatgacctgtatctggcaaacagaaaaccaagcaatattgcactcta  
cagagatttcaaagactaatgccacaattatggacttaaagattgcaaggggtgggtgattcccatc  
acatc

>chr5\_45532443\_45532643

tttcaagataatattgatcattctagcagCCTTCTATGTGGGCATTTTTGTTAGTTTACTATAAC  
TTTAGAAAAGAATGTGATTTCCAACCTTTAAGCTATTAAAAATTTGTTATTGTAAAATATAGCCA  
ATTATAACATAAGAATCATTACAGTCAATTTTTTAACTAAATTGAGAGAAATTATAATTATGGA  
GCATG

>chr5\_56945643\_56945843

tcaatgaattcttcatttctagatgttctttgtgtgtgtgttttgttttaatgtctacctcttca  
gcaattttttcattgatgtcttgaattgttttctaatctttgtgttggttttcaattttctt  
ttgtatctcattgagcttattttaaatacaatattttgaattatttatctgggtatttcaaagatt  
ccttt

>chr5\_62055044\_62055244

AGAATAcagttgattcttgaacaacgacagtttaaactgtgggtccacttacactcagatgtttt  
caatacagttggccctctaggttgagcgtttttcatccacaacaaatgcagatcaaaatggag  
tattctaaggatacaaagcccatatggagggctgacttttcgtatccacgggttctcaggaccac  
ctgca

>chr5\_65946244\_65946444

ccaatttcaagccaccgatatgacatcactggaaagaacagcacagtagcatatcattgtataat  
atthttcatcacagctaaaatagacaacctcaaaagcataagtaatagtataatgtaacataa  
gttatgaattttgagtatcattgttttgcataatttaattataagctactgtaatttttattag  
tatgt

>chr5\_68109844\_68110044  
tttctcctctgcttttttcttctcttctcctggtattccaattatacacggttacaccttctgaaattt  
tacctacagatthttgagtaatcagttctggggtttgtgtgagtttttcttttcttttctttttca  
ctttgcacttcagtttggaagtttctattgagctatcttcaaactcaacgatgctttccttggt  
tatgt

>chr5\_69290844\_69291044  
CTTTATTGCTCTATCTGTTTTACTATCGCTCTTCTTCAGTCTCAAACATATATGGACAAAAGCA  
ATCACATAAAGGTCTGTCTACTTAATATGGACATCTTTATAAAAGCAATTACAGAATCTTCTGA  
TAGATCTATACACACATTCAGATGTAAGGGATATGTTTCTTATACAGGATACTCTCAGTACATTT  
TGTTA

>chr5\_85368644\_85368844  
TCTTATCAGGCAGTTTAGTGTAATAAATTTTCAGATACAATACTTTTTAAACTAAACAAGAAAGCA  
GATCTTGCCCACTTGAAATAGGCAATTCCAAACAACAAAATAGATTGATAAGAATTCAGTAGATT  
AATATAAAACAAGTAAAGGAAAATAATAATTTTAGAACTTTGTTTCACTAGATAACCATCTTTTA  
AATAT

>chr5\_86358244\_86358444  
CACACGAAAACATCATATTTAAAAGAAATCATGAAAAATTCATTAGAAGCCCTTAACTTCTAATG  
AGAATGTGACTGCTATCagtcaggaattctccctactcccaaactactcttccaaaagtataca  
aaaccaagaagaatgaaaaattggaattaataaaaaacatthttcaatgaagctaaaatacatatc  
atgtg

>chr5\_91322644\_91322844  
TGCCCACTTTTATACACCTTTGATCTATAGAAAATATAGCAACTTTAGCCAAATTCATAATATGA  
AAATATAAATGTGAAAGGATCAGGCAGGATTCCAAAGACTTTAACCTTGGGTGAACATCCAGGTC  
TCAAATGTTGGTAACTCTGATTAAAAGATTCAAGCATATATAAAGAATCTTGGATCTAGAGAAAC  
TAAAA

>chr5\_103160101\_103160301  
ATGGTGGTGGAAATTGCCTTCTATTATATTTCCAACCCAACCAGCTGCCTCACCATTATGTGCCAT  
CAACTACAAGAGCTAAGAAATATAGATGGCTTGGAAACAAGCCACTTCCTCTGCCTGAGAAATAC  
TTTAGAATGAATTTTGAAGTTTGGTCTTTGCAATTCATCAGTATTATATTATTTTCATAGATAGA  
ATTAG

>chr5\_115979101\_115979301  
GATGTAAAAAAGTGTAAATATTAATGAGCCTGGGTAATTGTATTCTCAATTGCGTAGGAACTT  
TTTGAATTTCCCTTTTGCATTTGATGTTCTGGCTATTGAACATTTCTTTGTAGAAATATCTCTAG  
ATGTCTATCTGATTCCAGAGCATTACAAAGATTTTGAATGCAGCTCTTTCTTGTGATTTGATT  
CTGAG

>chr5\_121571301\_121571501  
AGTCGAGTTTCCACCTGTGGTGtttttttgtttttgtttttgttcgtttttttattattattatt  
tttagtattattattttgttttatattgacagtctcactctattgccaggctggagtgagtggt  
gcaatctcagctcactgcaacctcctgggttcaagtgattctcgtgcctcagcctccaagtacc  
atggt

>chr5\_155219822\_155220022  
attagttcagccattgtggaagcagtttgagatttcttaagaacttaagcagaactacat  
ttgacctacaatcctattactgggtatatacaaaaaggaaaataaatggttctacaaaaagac  
acatgcacttgatgthttattgcagagctgttcacaatagcaaagtcaggaatcaacctaggtg

cccat  
>chr5\_157327822\_157328022  
ttcctgcaactgtgcttttgcctcacaggccaggtggtgggagcacagcaagagaaacaaaaac  
agcaggtgttctccccacgttggtgggactatagcccctgtgattggagaggatggttcacccc  
tcagaaggtagcccccgggcacctccactgctgttaccgtggctatcattgcaactgttgtgac  
cattg  
>chr5\_164305822\_164306022  
acaccccagtgatcccttgcctgtaagtgcagactgtatgtgaggattctgttctgatgatca  
gaatactgtgtgagtgatgggatgtcacttccaggatccggttgataaagactatggaaccctt  
atgggtactctttttgttctgtcacacattccctctctgatgccttacactaagggatgaaaac  
tgta  
>chr5\_164909622\_164909822  
acaaggatgtggaaaaacaagaatcctgctcatgatagtagaaactggtgaaaaacactgaaact  
ctttagcactttttactaatgctgatcatatccatgccttatgaccctatagctccactcctaag  
cctataaactatggacatgcataagatgtgactggaagatatgaacatcaaggatttcatagt  
ggcta  
>chr4\_18795702\_18795902  
TTATCAAGGGGAAAAAGATGTAACAGCCAAAGATAACTGAAGATTGATCCCTCTTCCCACCACAC  
ACACACACGAATCCATGATGATATAATGTTAGGCCTTAGTACACCTGTGGGGGCTTTGTGTTTTA  
GCATACAGAGAGAAGTTTATTTGGGTAGCAAATTCCTAACTTTTGATATTTATAGGACATTTATT  
TTTGC  
>chr4\_20174102\_20174302  
gaacaaattttagaaagcaaaagatgccagtagtatgtgcctttaggaagagtgttcttggtta  
aatccaaaagctcatcagaagattcttggacacatccctcccactagatagatggttagctaaat  
cctgccattagaatatcagtacatttgcctcaagtgaacttttataaaagttactataggagtc  
cctaa  
>chr4\_29760102\_29760302  
CTTGTTCataataaaaatattttgataaaataatatttaaGATATCCTAAAAATAAATTATCTG  
GACATCGTCACTTCAAAGTCATTTACAGCAGAACTGTTAATCATGGACTTGGActgcaaattcttt  
aaaaatagtcttctgatttatgtttaaataatcttcattgatgtggatatgacttcttcttgagtt  
agttc  
>chr4\_31010302\_31010502  
AAATGGACAGCATTGTATTATTCTAACTCCTATACCCACAGATTGCCTGCCATGTTTTTTGTCC  
ATTCTTCTTTTTATTTTCTGCAGTTTAGTAAAGTTTGTTTTAAAAGAAATCCCTTCAAAAAGTAA  
TTTAAAGGAGAAAGTTCCCTTAAGCTAACATAGTTCTTATTTCTTCTATTTTCAACTTCAGTTC  
TTTTT  
>chr4\_45806443\_45806643  
ttttgccaccaggcctgcctaaaacagctcctgaaggaagcattacacatggaaaggaacaagt  
ggtaccagccactgcaaaatcataccaaaatgtaaagaccatcgagactaggaagaaactgcatc  
aactaactagcaaaataaccggctaacaatcataatgacaggataaaaattcacacataacaatatt  
aactt  
>chr4\_58119843\_58120043  
ATAACTCCTAGGGAGACAGAGAGGTGGCAACCTTTTACAAACAGAGTGTCAAATTTCTAACCTCT  
GATTTCTGGTATTTTCAAGAGATAGCTGAGGTCACTTTGTTTTGACTTCTGTGTACAGGGAAGAG

AGAGGAAATACGGGGATGATAAAAAGGATGAATAGTGAATCCCAAAGTGTGTCAGAGGGAAAGTGTta  
ttgat

>chr4\_59719243\_59719443

tgggatagtaaactagttcaaccattgtggaagttagtgtggccattcctgagggatataagaact  
agaattaccgtttgaccagccatcccattactgggtatgtacccaaggattataaatcatgct  
gctataaagacacatgcacacgtatgtttattgcggcactattcacaatagcaaagacttggaa  
caaca

>chr4\_68067605\_68067805

cgggatattcaccaggtttagccaggatggcctcgatctcctgacctcatgatccgctgaccttggc  
ctcccaaagtgtgggattacaggtgtgagccaccgtgccagccccatattttacttatattc  
tttattaactctccctccctgttcagacgcaaactttatgagagtgaggatTTTTTgttttattg  
tattc

>chr4\_72917736\_72917936

aaaagtcaggaccagatggattcacagccgaattctaccagaggtaaaaggaggaactggtacc  
attccttctgaaactattccaatcaatagaaaaagagagaatcctccctaactcattttatgagg  
ccagcatcattctgataccaaagccgggcagagacacaaccaaagagaatTTTtagaccaata  
tcctt

>chr4\_73630136\_73630336

CACATATTATTATTTCTATGATTCCTATTTTCAGTAGTAATTGCAGCATTAAAAAGATGACCCTA  
AGCACCTCATTTTCTTGCCatttatttataattttttgatattttatttttCTCCTTAATTTTAGA  
GTGCAGAAACTTTGGTTTGTGTAGTCCTTTGGCCACAAGGCCTCCAGCATTTACAACCATGCAA  
AGGAA

>chr4\_77267376\_77267576

caaaaattaactcaagatggattaagacttaaatgtaagacctaaaaccataaaaaccctagaa  
gagaacctaggcaataaccattcaggacataggcatgggcaaagacttcatgactaaaacaccaa  
agcaatgacaacaaaagccaaaattgacaaatgggatctaattaactaaagagcttcttcacag  
caaaa

>chr4\_82151776\_82151976

gaagatgtgggaaagtttggaaacctcctagagacttgttgaaatcgttgtaaccaaattctgata  
gtgatatggacaatgaagtccaggctgaggtggcgcagatggagatgaggaacttattgggaac  
tagagtaaaagtcactcatgctatgctttagcaaagagactaatgctttagcaaagtgccatttt  
gtccc

>chr4\_101748777\_101748977

ATTTGCAGATGAGGATGTCTTGTGAATAAAATATAGTCATGTTTCATAGGTTTTAAAAGAAAAA  
AGGACTATTTAGCACAGTCTGTATCCTTCCCTTTcagcataggctagaaaagagtaagtgtcct  
agaatcaggaagacctaaagttataaatccctatgcccctcttactgattatgtggcaattgccaa  
gttta

>chr4\_112011751\_112011951

aacagtagtgaatgtagtagatattaatccaagtatataaataatcaatttaaaactcagtggtc  
taaatacactaattgaaagacagattgtcagagcagatcagaaaagtgtgtacgctcgtgtataag  
aaatccactttaattaataacagaaacagattaaaaccaaaggaatgaaaaagttgtatcatg  
caaac

>chr4\_125923150\_125923350

TTAACCTCCATGCAAGGGTATGTTGTCCATTTCCCTTATGGATTATTCATTCTACGTTTTTGTTA

CTGTAATCGACAGTGCTCCTAATTTTTCTCACCCACAACACTCCTGTGTAAACCTACATAATTTG  
GGAAATACAGTTAAGCTGAAGCTACAAGCAAATTTGCTGATCAGAAAAAAAAATTTCTCTAAAAGT  
TAAAA

>chr4\_134655150\_134655350

gtagttacatatgtatacatgtgacatgctggtgctgacccactaactcgtcatctagcat  
taggtatatctcccaatgctatccctccccctccccccaccacagtccccagagtgtga  
tattccccttctgtgtccatgtgatctcattgttcaattcccacctatgagtgagaatatgagg  
tgttt

>chr4\_141905150\_141905350

cccaaagtgtgagattacaggtgtcagccccgtgccagccgtgtgactgcattttgactgtga  
cctgtcacatgaggtcagatgtagaatccccacttgcggtgttatgtccgtgttcaaaaat  
aaatgtgaatcattttgcattttgattttcagattagggacactcaacctgTATTAATATCTT  
GAGGA

>chr4\_144049150\_144049350

aatggaatatatttactatggtgttctttacagaaaaggtttgccaaccctgCTCTAGAAATAC  
tggttggcaaaactttatgaccatatccacaataaaaaatagtcttcataatgtggctctctt  
acataatcatatatattttatataatataatctgaaacaaatgtttcatgaaataaacctcta  
ctaca

>chr4\_150383150\_150383350

AAAATCAGGTGCTTTTACAGGCTTTATGTATTACATATATGTTATTACCTCTATCAATATACTGT  
ACTTAAAAAGTTTTATATGTAATACATATTGAGTGATCTATGAATTTTTGGAAATTTGTTAAT  
GTTCTGTATCTGTGCTGCACaaatgcaggtcattatatagtaggtctggagtggagcctgagatt  
ctgca

>chr4\_161271950\_161272150

TTCTGGCTTTAATGCTTATCAAATTTGTTATCAACCACCATAAAAATAATGTTGGCATTATTAAC  
AAAGTACCAATAAAAATAACTCAAATGGTGAAGTGTGTGTATGTATGGGGGTGAGATTACTTGCAT  
AAATTCACACAGATGACAGGAGTGGGTGTCCTTAGTTTAGCAATGTACAATTCAGTAGCAGACT  
AAGTA

>chr4\_172056025\_172056225

agaaaagtgtatatgggactggagagcatcacataaagtttgcaaggagagtttatcaatat  
aaaaaccttctgtaatatagaatttaacatccaacctagcaagaaaatctagaagactgcactta  
aaaatatgtagaatgactattataagcttgagaaatccccagccatagtatatgatgcagaa  
atacc

>chr4\_176153012\_176153212

AGATATATAAACCTCTGTCATTCCTCATAACATCGTTTTTCCCTTATTGAAAAGTTGGTTAAAAAC  
ACATTTAATGCTTTTGGGAAAGAGAGAAAGAGAAAAGCTCCAGCTATAATTTGACAGAGAAGGG  
ATTGTAGGAAACAGACATAACTGATACAGAGTTTTTGTGTGGGATTGTAAGGTATAAAAATAAT  
TTGTT

>chr4\_180723206\_180723406

TCTATTACAGAGACTGTTGTTAACCTTCCATTCCCAACTTGAACCTTACTTAATGGCGTTGCCAAC  
CAGCAGCGCACCCCTGAGAGCCTCCAGCAAATAAAAAGCTAACCTAAGTAACATCTTAGGTGTT  
AATGTAGGTTTCCAAGAAGAAAGGTAATCTGATCTTTAACATTCTGTTTCTACTTGCAAAGTGT  
AGCAC

>chr4\_189259406\_189259606

TTTTTCTTTTTGTCAGAACTGATGAATGCTAATTAGTGGTCATTATTGAGGAATAAGTAAAATA  
TGCATTTAATTACTCattcattcactcagcaaatcaatgatcacttactactcaggactggga  
ttatggagataataaaacagctgattcctttcaagcatgtaccacggagtgaatgaaatggacac  
ccaaa

>chr3\_3348200\_3348400

TGAAGATAAATGGCTCATCTCCCACTTTCTTTGGTTGAGGTCTCTATTCTGCACAAAGGCCCTGG  
CAAATCTCTTCATTTTTCTTGTAGCTCTATCTGCTCTCCAGTGCAGGGGCATATATCACAGCCAC  
CTGTCTGCTGGCTGTGAGACACCTCTACAGAAACAGACAGCTTAATGCAAAAGAGAAAAGACCAG  
TCTGG

>chr3\_3686600\_3686800

agacagaggaactgcagtgagaaagagtttaataccacagagccggctaaaggggagactaga  
gttttattactcagctcagccttctgaaaatgtggaggctaggagttttcagagagtttgg  
caggtggggagctaggaaatgggaaacccaattaattaggtcagggatgaaatcatagggggtt  
ggagc

>chr3\_7903000\_7903200

TCTCTAATTTGATGATCACTCGAACCCAGATTCTGGTGCTTACCCTGGGAAAATAACTTAGACCC  
CTCAAAAATGCTGTTAACATGTTTATGAAGGAAAAGTAAAGTGTGTGGTAACAATGTACTGTTT  
GATGGAGAATGAATGTTTTGGCGACAAGAACAAAATGTCCAGAATACAGACTGTTCACTGAGAGT  
AAGCA

>chr3\_28996596\_28996796

TGTTTTATAATAAACAGGAAGAGTATTATCCATTGTATAGGTACTTTAAAATAGGTGCTTTAAAA  
TAGTTCTTGATTGCTTTCCTAATCTCCTTACACATATAGAGACCTATGCTGTGTTAGCTGTATAA  
TCTGAAAGCAAGAGATCATTTGGTAGAAACAAAATGAAATGGCTTAATGTTGGCAGGGTGTAAAC  
TTTCA

>chr3\_33393196\_33393396

aaatgggtaccgccagtttagaatacagcttggcagtttcttaciaaagctaaccataaatgtatca  
tttagtcaagcggctcgatatattaagtcacaaaactggttttgtggatgttcgtaaaacctgctt  
ggaaaagcaagctaggtgcagtggttgtgcctataatcccagcaacacaggaggctgaagcaag  
aggat

>chr3\_34684596\_34684796

TGataaaaataatatataaaaattacatttttagaaattacctaattatTTTTTTTcttacaatattctt  
ataaaatcataaaaataatatGAAGCTTATTTCTACTTTATAGGTCAGAAAATAGAGGCTTTGCT  
AAcaataacaaatgtcagtaaaatccaaaactgctgTTTTTaaaagatcaatacatttggaaaac  
tgcta

>chr3\_57721160\_57721360

gatgtatgcattatcaaagattaaatcaagctaattaacacatctatcacctcacattttcatc  
atTTTTTgtgggtgtgaacatttaaaatttactctcagcaattttgaaatatacattacattacta  
ttaattatagtcaccatggttgtgcaatagatcctaaaaacttattcctcctgtctagccaaaacg  
ttcta

>chr3\_74129910\_74130110

GTTCTCTCAGGACAGAAAGCCATCTACCAACAGAAATGGGACAAACCTGATTCATTTTCTTAATA  
ATCTTTAAATCTACGGCATGTTCTTGGGCCAGAGGTGGAGTTAAGTTAAGCACAAATTTTAAAC  
AAATGCATTCTGTATTCTGAAGAGGTGAGCTGCAGGAAAAGCTATTTAAGCTGCCACCATGGCTGC  
ATTGT



>chr3\_82326110\_82326310

CCAGTTGATCCCAAGGCACATAACTGCGtatctattgctgtgttacaacaatcccaaaattaat  
aggtcatttcaataatattaacttatttttctttacaagtctgcaattctgacaaggcacaatgg  
agaaagcttattttctgtatgatgtagcatagagtgactcaaataaactcccgtggccttgaggatc  
tattt

>chr3\_83208510\_83208710

AGTTAAAGCTACAGATTACGTGATCCACTattatattatattaatagatctttattaatataaaCA  
CCTATTATTAGATCTTTATACTTTCATTCCAGATATTTATCAGTCTaaaattttaattaaaat  
tCACAGTCTGCATGCTTCCTACAACATACTGTGTTTTAGGGAGGTAATACATAAAATACATTAATA  
TATGA

>chr3\_85559110\_85559310

AATTTAGAATATGCCCTCTCACAAGAATCTAGGACAGTCTACAAGTAATAAACAAAAAATAAAG  
CAATGTGGGCTCACTGCCAGATGATCTCAAATATGTATAATGGAACAAAGAAAAGAAAATA  
CTTATAAGCAAATCACTCCATGAAGGAAGAAAAAATGGAATAGTAATTGGTCAAAATTGTGGTA  
GAAAA

>chr3\_86857710\_86857910

tactatgagaaactaaatgccaataaattagaaaaactggagaaataataaattcttatacacat  
acaatccaccaagattgaactatgaaaaatccaaatgtaaacagccaataacacataacaaa  
atggaaaccacaacagtttcccagtaaagaaaagcccaggacttgatagattcactgctgaattc  
cacca

>chr3\_88468310\_88468510

tgtaataataatagacataaagtgcacaataaatgtaatgtgcttgaatcatcctgaaactattc  
tcccacccctggctctgtggaaaaattgtcttctacaaaactgtccctgggtgcaaaaagggCAC  
CTttattcccttttttgtgtccatgtgtactcaatgttttagctcccacttatgagaacatgcaat  
atgtg

>chr3\_94588310\_94588510

TGTAGACTGCCCTTCCCAAATCTGTTGTTATTTGGAAAAATGTGTTTATCAGCAGGAAATCAAT  
TCAGGCTGCATGAGTTACAAGCTAATGTTAATTGATCCTGCTTTTTGTTATCTAAACTGTGCAAT  
TTTTTTTCCTATGCTGGAGAAATATATAAGAATACATCCAGAACACTCATTTTACAAATATACAA  
ATATA

>chr3\_105698910\_105699110

TGAAAGAAGCTGCCGTTTAAATTTGACTCATCAGGCTTATCGCTCATTCTTTCATTACATTTTTT  
TCTTGAAATCTCATCAAAGATTAGTGTAATCTTATCTAAAGGGTCACATAACAAAGGAaatagta  
ataaccaacatttctaaagttggatgtttaggattaccaagcactgtaatacataactatttcctt  
tgatc

>chr3\_106340510\_106340710

tagtaagaaaccttgaatacaccaccttaaccatttattaagttaatataatgggtcaagaaga  
cctcgatggctcctgataacctgctctgagaaggaggaaacatcagttccataagattcctgtc  
taaaaggcatcgtctgagcctaactcaggcctatggttgatgaagaacatcacacaaacctcaa  
ttgag

>chr3\_116974510\_116974710

CTCCTTTTTTGTGAGATTTTTTACTCAGCTCTAGCCAAGGGTCTGGATCCTGAGCATTTCTCTT  
CCTTCCCACTTTTCTTCTTAAATCCTTATTTTTCTGCTTCCATTTTCTCTCAGTATTCATTTTAC  
TCAGCAAAAAGGTGAATCTAAACCATAAGACCTAAAGACTCAAATGGGTGCTTTTCATGGTTACT

CTGTT

>chr3\_138707110\_138707310

agagggcccttgggaagtcttccagtctgacctgcccatctgacagatggggataatgaggtccca  
ggaggagaagggatttgcccagagtgaagcagctaAAGGAAGCACGATGGCTAGTTACTTCTATT  
GTTCCAGGGTCTGTGTGCCTAAGACTTACTTCTTCTCCAGCCAGAAAGCCTTCCCTTGAAGCTGA  
CATCA

>chr3\_154433306\_154433506

TTGaatTTTTatctTTTTtattctTTTTaaagTTTTattTTTTtataCATAGAAATAGCTCCTATAA  
TCCCACAGATTTAAAATATATCTTCTGTTATAGAAAATTTGCAAAGTATAGAAAAAACTGGCCTT  
ACAACCAATTTTCAAATAAAGTTGGACTTAATTTTTCCATTCTTAAAAGACAGCATGGTGTCTAT  
GGATA

>chr3\_176331306\_176331506

AACAGTGGAACAACAAGGATATGGAACCTTATATCCAGCAACTTTTTTTTTGTCCAGAACAACCTAGT  
TCGGAGTTTGCCTATGAGTCAGTAATGTATTTTTATGGTGATTACTAATATTTTCTTAGGAGTTCA  
ATAAATATTTGGACAAAAACAGACAAAAGTTACATTAACCTAAAGTACAGAACTAAATAA  
AATAT

>chr3\_178129306\_178129506

GGCCTCTTCCTTTGAGAAACTACacaaaacttccattactcatataatTTgtgaaactcctattt  
tggaaattgcctttgagagcctgtagcaaattcttttgaataacttcagaggtagtaaattacaat  
cttctgaggtgcacattttgaaatagtcaaagtcattcaaagcaacttctgaaaagtaagatta  
ggaga

>chr2\_2343593\_2343793

GATGCTTCACAGAGGAAGGTCACACCCTGAGAGCCTGGGCAGGTGGAGAAGGCTTCTCCGGTGAG  
TGCAAGAATGGAGGAGGCGCTGGAGCTGTTCTGAGGGAACCCCTCAGCGCCTGGACATTAGAA  
ATGGCCTCAGCCCTCTGTCTCATCTTCCActcctgagcattcggcaagatgccagtatcttgtt  
aataa

>chr2\_4589125\_4589325

ccttaagggtcaatggaagagacaagaaaaatcaataagatacataagaattggtgaggaagaat  
aaagctatTTtaatatgccgttgatgtaagagTTTTacctggaaaattctaataatccataata  
aaaataactcaataaaaagttactatggttagcatgatataaaaattactatacagaaattaaAAGCT  
TCATA

>chr2\_7437349\_7437549

tggtaataactaagagatgccctaattggtatctcctgtattccacacatactcttccttatctccat  
tgtggagtagtagattgatttcatcttgatattgcaggtcaatcaccagccaacattgtaact  
cccttcttcgctgttttcttagaggcaggaggagcccaaagtgtccaggtggcaatcttaactt  
ccagt

>chr2\_19881919\_19882119

ataccaagcacaattgctggatcatatgctaagaatatgtttacttctgtaagaaactgccaaag  
tatctttcaaagtggctgtaccatttttgacagcaaccagcaatgagagacttctgttgctcc  
acatcctcaccagcattcgatgctctcagtgTTTTggattttgaccactctgacctgtgtgtgg  
ggtat

>chr2\_22172095\_22172295

CCAGATTGTAGGCTAAGGACTGTAAATATCCTCTGCAGTGAAATGTGTCTGTTGGGTCATGGAGG  
ACCCAACTTTTTTCAGAAGGAAGTCAGACTGCACATTTAATACTACAGCTTTCTTCTGTCTCTGC

CTGGGATTTATTTCTCATCCATTTTCCAATCTTGTTTCTCTAAATTCAAATAGTTTCTCAGTTCA  
AACCT

>chr2\_34510096\_34510296

ggtgaacatgtgtcatgggggtttgttgtagacagattatctcgtcaccaggtattaagcctagta  
cccattagttatctctgatcctctccctcctcccaccctccaccctccaataggccgcagta  
tgtgttattcccctctatgtgtccatgtgttctcgtcatttagctcctacttataagcgagctat  
acatg

>chr2\_57966096\_57966296

AAATTCAAAAATTGTTTTTAAAGTCATTGTAATTAAGAGATAAAGCTTGGTGGGTAGTAAGTGG  
GATAAGTGCTCAAAAATGGTATCATGATTATCATTTTTCTAGATAAATCATAATTAGAATTTTTTT  
CTAATTTTGGAGTCTTCTCATAGACTTCTTAGGTCAATAAGGTATAATTTACTCAAAGATATCCC  
CAAAT

>chr2\_104108368\_104108568

TGGCATTATGCAAGAGGGAATGTA AAAATGAATGGCCGTGCTTAGTGATAAGATTAGTTCATTG  
ATTCAGGATCCATCAAGTATCCACCTAGCAGATCCATCCCTTACAAATTTTCAAACAAGAATTTTC  
TCTAATGGTTTTAGGATATGTGgattatcactacctagacttatgcattaagaatagcaaaatgg  
tgaat

>chr2\_116617730\_116617930

tatagttttaataagttttgaaattggaaagtctgagttctccaagtctgttcctttttcatgat  
tcttttggtattctgactggatcctctgaatttttcatatggaacttaagattagattatcagt  
ttctacacaaaggcagatggaactttgacaaatattatattttgaattaataggtgaaatagact  
aactg

>chr2\_126961530\_126961730

gcggaggttgagtgagccgagatcacaccactgcactccaatctgggtgacagagcgagactgt  
ctccaaaagagaataaactaatagcttccagggcttagggatggaggagggaaggaagtgggtg  
taactataaagcggtagaaggagaaagatccttgtgggatggaatgttctgtatgctgattgggg  
cagtg

>chr2\_129960730\_129960930

ctttacagtgagaaacccacaaacaccacctcagccagtgatcaaggttaacatcaaagtgttg  
ttatgtggataaacaggtactcttgatgtgaggtgagaatggtactttaccactgtgattttcct  
tccaaaacccatgtccacaatttcatcatgagaaaaatcagaaaaatcccaattggaaggaa  
attct

>chr2\_140810930\_140811130

aggtaaatttcattttgtattcataattggtgaaatgtgtattgggtaactaagagttcactcta  
ctattcttctactttttgtgtaaaatgaaatctttTCATAACAGAAAAGGTAAAACATAGGTAAA  
AAGTTAAAATGAAAGAACAACCTCCTACCTGCAGATATATTGCTAGATCTGAGATTAATACCACC  
ATAAA

>chr2\_142481330\_142481530

aattatatttCATGACCTAGTGTCTTCTCAAATTATCATCACCAGGCCATTTTCAGAAATGTCG  
TAAAATATAAGTGAACACTAAAATCAAAGGaaaaatataatataatattCTTACTCAATCCA  
CTTAAAATTCACCAAAAATGTCAACACTAATCAGGCCAAGTGATGCAATAAGTTTATCTTACTTT  
GTAAT

>chr2\_143241930\_143242130

TTGGTCCCAGATTTCAAGTAAACATTCTCATAATCCACAGTTGAAACACATTGCCTTGTACAGAG

ACCACATGCAAAGGAAAAATTGTTTTCTAATTTTTATTGTCTTTTGGTGGGGGATGGAAGGACC  
TGCACCTTTCTTAGTATTGTTGGAATTATCTAAACTAATTTACCAACTTCTTAAAAGTAAGCTAA  
GGAGA

>chr2\_153878554\_153878754

CTGTGATTTGGGGATAGAGATGTGAGTGGGTAATGAACTGAAAAGGAACAGGGCAGAAAAAGTTA  
AAATTCACAATTTTGCATAATGTCTGCCTCACTGGAACACATCTAATGTTTGATTTTATGTATTA  
AAGATGCTTCAATAATTGACTAAATTTTATGGAGTTTTTGTCTGGAGGTTTTGGTAATGATGTAC  
CTTGT

>chr2\_154860954\_154861154

gatctgcctgcttcggcctcccaaagtgcctgggattacagatgtgagccaccgcaccagccAGT  
GCTAAATTTAATACATTGAAGGAGAGATTCATTTCTGACAGAACATGGAACTTAAAATGAATATG  
AGTCAGCCTTTCTTACTACATATTGTAGATTGATCTCTTAGTGTTTTGATCGACAGCTAGTATCT  
CAGTC

>chr2\_164377354\_164377554

gccagagaattctttgacatgccacgtattgataaatgcagtatatgttcctccccttgaggtc  
agtaactatgtgaccataagtgacactgtgctcgttccagtaaaagaacttaagaaactggca  
gctgctacttctgattctcttgggatacacgatcttgaacctaggaacatgctgtgaggaag  
cccaa

>chr2\_167314554\_167314754

TGAGCAACCTATTTAGGATTGGTTAAATATTTTACCACCTGAAGTACCTGTTATTTATTGTAGTGC  
ATTCAGCAGTCAGGAATAGGTATTATAAAGTACATTGCaaatcccatctctactaaaaatacaaa  
aaaaatagctggatgtggtggcatttgcctgtagtcccagctactcaggaggctgaggtgggagg  
atcac

>chr2\_195852955\_195853155

CCAAATATGTTTTAAGCAAATTTATATTAACATGATTCTCAATGCCTCCAAATGCTTTATCTGTA  
TTATAAACTTATTGTAAGTGTATATATTGAAAAAATCCAGTATGCATGTTTCTTAGATTGATAA  
AATAAGTCATAGAGGGCAGGGACTTGACCATAGAATTTCTAAGAAATTCAAATTTGTCTAAATCT  
TTGTA

>chr2\_222586356\_222586556

taccagtagagacatTTTTcataatggttgactactttacattcccgccagtagtatatgagc  
attccagtttctctgcattcttacgagcaattggtatTTTTgtgtctTTTTtacaatagccatct  
actgggataagatgatatttcattgtggttttgatttgcgtttccctgatgattagtgatgttga  
ctatt

>chr2\_222971556\_222971756

tttagtagaaacagggtttcacatggttagccaggctggtctcgaactcctgacctcaggtgatc  
tgctcgccttgacctcccaaagtgcctgggattacatgcgtgagccactgagcctggctTATATTA  
ATTCTTATGGGAAGAAAATCCAAGTGCATAAGTCTACTACTATAAGCTATATTTTCTGGAATG  
TGAAC

>chr2\_224382756\_224382956

TGGGAGGGACTTATATTCGCTTGGCTATTGGCcaaatacaatgaaagatctttgtaaa  
ctgaagaatgctgtaATATCATCATTATTGGAATGTCAATGTTTTGGGAATCATTGGCACGAGAA  
TTACGTGTAAAGCTTTTTGCTGATACACGGTCCTTGAGTTTCTTGAACCTTGATAAACTCGTCT  
CCATC

>chr1\_48422613\_48422813

gggaggcacctcccactaggggctgactgacacctcatacaaccgggtgcccctctgagacaaag  
cttccagaggaaggatcaggcggcaacatttgccattctgcaagatatgctggtctgtagcctct  
gctggtgacacccaggcaaacagtgtctggagtgacccagcaaacccaacagacctgcagc  
tgaag

>chr1\_56119412\_56119612

aggctggtctcaaactcctggcctcaagtaatccacctgctttgacctctcaaatgctgggatt  
ataggcatgtgccattataaccggccAAGAATTAGTTTTGAAAGATGAAGCAAACTCTTTAGGT  
GAGGAATCAGGGTAACTTTAGGGAATATAATACCATAAGCAAATACATGAAGGTGTGAACATGTA  
TGAGT

>chr1\_88616812\_88617012

CCTGATTGAATCCTGGATGGGAAGACAATCTACCCACATCCCAGTGACAAAACCTCACTGAATC  
CAAGTGTACTAATTCCTACTCTGAAGATTATTTCCAAATCGGGAGCAACGTTTTAGGAAATATTG  
GCAACAACAATTAACCTATGATGCTACGTTGACTATGATTTGATAGAACTCCTTCATACTCATC  
CTCAA

>chr1\_90677412\_90677612

ttttgttctcttgatgaatagaccctttatcattacgaaacgtcccttttaatttctttactat  
gtttgatactaatacagttactctaccttccttccttcattcctctccaccctctctctttttt  
ttaatgttttagtttacacagtctgtcatttgctgtctttttattttttagcctttttgtgtcttta  
gaagc

>chr1\_99551212\_99551412

TTATAACCAAGGCAACTAAATTTCTTTCCATTATCTCTATGTGTTGGGATAACTTATATTGTTGC  
CCTGGAAATGAGTAATATCTGTCTAATGGTGCCAAATGGGAAAACGTATCCAAATTAGTGCAAG  
AGGCCATAAACTGTCACTCTGCTCGAAATCATTGTATCTATGTGACAAATTTCCAGGAGTT  
AGGTC

>chr1\_99944412\_99944612

ccaaaaagacacatgcactcttatgttcatcaatgcactatttataatagcaaagacatagaatc  
aacctaggtgtccaacaatgggtggattggataaagaaaatgtggtacatgtacaccatggaatat  
tatgcagccataaaaaggaatgaaatcatttcctctgcagcaccatggatggagctaaaggccat  
aatcc

>chr1\_104870277\_104870477

aaattatttttactatacatgcaataaatgatataattattttcctttttttttttgctttact  
aaaaatataatgtggacatttaagacaaaatccttgatcattatttttaagacacataaatgtttc  
tgttgtgtatctataatttatccttttccttgttatatagattccattgtgagaataATTATTC  
TTATT

>chr1\_118855077\_118855277

ATTTTGAAGCTGTTTTAGCTTGGGAAAAACATCCATTTAATATTGTCATTATCTCATGTTGGC  
ATAAACTTATTGATCAAATAACTGTCAATGTGCTAGACATTTTGTAATTTATTTCTGATCCAAT  
TTGCAGATGAGGACTAAAGcttcagaataacttctgatggaagtattataaataaccattgtcttc  
agaat

>chr1\_154073576\_154073776

ggcagaggttgccgtgagccgagattgcgccattgcactccagcctgagcaacaagagtgaact  
ctgtctcaaaaaaaaaaaaaaaaaaaaaTTTggctggggcggtggctcatgcctgtaatcccag  
cactttgggaggctaaagcaggtggatcacctgaggtcagttcgagaccagcctggccaatatgg  
tgaag

>chr1\_169468176\_169468376  
gggtacacaaagcctaatacatatcaGATAACAAAGTTCATGTTGTGCTCACAGAAATCAGCTCTT  
CACATACAGTGGAAATGCAAAGTTAATTTGTTAATAATGGATAGAAAAGAAAGAATAATTTTGACA  
ACACTAAGCttttttttttttttttttttttgagatggagtttcactttgttgccaggttagagtg  
aagtg

>chr1\_179908377\_179908577  
AATCCTAGTTACCTTTCCCAACCACTATGAACCAATAACTCAAACAAGGTGGTGATTTAGCTGTT  
TGTCCATAGTTCCTACTAAATCTTCAAGATGTATCCTATACTTCAAAAAAAGATACATACCTTAA  
AATTAGAATTCCTGCTAATACTAAGTCCACAGGGATTAAATTCGTTATTCTAGAGTCACAGGGCA  
AGTCA

>chr1\_186500377\_186500577  
ggctttttcagttttcagtgttttacactgatttttttctcatctttgtgaacttatctacctt  
tgatctttgaggttgctgacctttgaatggggttttgtgggtctttttgttgatggtggtgt  
agtagttttccattttgtttgcctttttattttttaacagtcaggccactcttctgtagggctgct  
gcagc

>chr1\_188030977\_188031177  
tctgtgcagaatttcttttagttaatgaggtgccatttgtcagttttgtggtttttccaattgct  
tttgagttttgtcatggagcctttgccagttctacatccagaatggtatctcttaggttatc  
ttccagggttttatagtgtaggtttacatttatctttaattcatcttgagtcaatggttgtt  
ttggt

>chr1\_194391977\_194392177  
gttgacagagaggaaagccattcagctccaggtcccagtaaaaagttggttgactctgtagcca  
tgatcagaactctcaaagtcatgtcacctatgtgagacttgccatctgtcctatctatcctgac  
gcttgctcctgggtcctaacacctgtcagacaaacttctcctgcctctcttctctgaggctag  
tccca

>chr1\_194978377\_194978577  
TATATGATGAAGGAAATAACTGTTTGCAAACAAATTTTCTTTCTATATGCACACTTTGAGAGT  
AATAAAGCAACTATGAAAATAAAAATATGAGGACCTTAGGTCATTAAAAAATGCTGTGACAATA  
ACATAAACACATGTTTTCAATAACCCAAAATTACAGGCACTATTTCAAATCAACTTTATTAATG  
TTTCA

>chr1\_197426177\_197426377  
TCATTGTTCTTCGACCCTAAAACCCTCATTTCATTCTCCTTTGCCTAGTCAAATACATTTGTTCT  
CATAATGTTCCAGTAAAGATTTCCCTTGCTTCCCTCCCCACACAATCAGCATTGAGTGTCTTG  
TTGCCATACAATCCTAAGTACGCCTCTATCATAGCATCGTATAATAATACTaatagtggttaata  
tttgt

>chr1\_215271377\_215271577  
TTGTTTTTATAATCCATGATCATGTCTATCTTGGGTCTTTGTCTTCCCTAGTAGTTTTGTTTTTTA  
ATCTGTTCCCTGGCAGTTATAGTGTCCCTTGCTATTTGAGTTGTCTTTGCAGACATACATTCT  
GCTTAGTTAAGACTTTGATAAGTGTTCATTAAAAGTGTGGGCAGTATTCCAGAAGAGGAGAATCA  
TAATT

>chr1\_216709177\_216709377  
TCTCTGTTCACTGCATCCCTTCACCACGAAAATTCCTGACAAAATGGTGTACATGCACTTTTGCA  
CTAAATTCATCTCCATTCCACTAAAGTCTGGATTGCATCTCAGCTCTATCATACTGTAATCACCA  
ATGACCTAATTGCCCATCCCATGGCCTGTTGAGATCCGATTTGATCTCTCTGGACTATTTTGTCT

CAGAC

>chr1\_217332577\_217332777

gaatgagccagcatgcccagccTAAATCTGTTTCTTATAAGTATCATCATATGAGGTTTTATCTT  
TGCTCCTTACATAGTAGTGTTCACTTTTTTGTTTTCCACCAAAGGAGTCACCAAGGGAAACCAGA  
TGAAACTGTGTTCAATCTTTATTAACTTTAAGCACTTTAAATGCCCTACTTCCCATACATACTG  
AAGCA

>chr1\_219663977\_219664177

GCATGACTTCATACTATAAAAATCATAAATATTAAAAATcctaactctttattgaaatgcttactatgt  
gccaatgactgctttctatgctttttctcatttacttcttctattttttattacataatcctg  
tccattttacaaatacagaaactgaacttttaggaagagaaaaatagcttacataagtgaactagtg  
ggtgg

>chr1\_239048177\_239048377

acagatccagtgataatcttctcattcctcactttcctcagtggtggcagggcagacttttcacagg  
ccaattctggagtggtttattgggttaaagctgaagatcctacctggagctacttctctaact  
ttccaatgtatttgtctaaggctactatctgctatattaatacatttTATCttttttggaat  
ggtat

>chr1\_248392777\_248392977

agcagtgggcgtgtcccagcaaagcagtagcggaaggcttcagctgggggagctataggtcagct  
ggtgcatgtctgttagggccagctccgcaggagctctctgacaggagcagctctgtggcaagggtggtg  
acgatgaaagccccaggaagcacatatgttgggcatccaaagctgtgctgcaagcaggcatggc  
caggc

>chr9\_28178200\_28178400

AAGCTACAGATACCCGCAGCTCCCACAGTGTGTGATAAAAATTTAAATTGTGACTTAGAGACGGT  
AGCGTATACATTATATTAATAATGTCTGGGCTCTCACATGTAGGAAGAGGAAGCTTGAAACCGTAG  
TTTACAATCTCAGTAACTTTGGAACATGAAATGACTTATATAAATGAAATATAACATTCAAAATAT  
ACATC

>chr9\_31418600\_31418800

ACACACAAGGTTGCTTAAATTCGCTTTCGTTTTTGGTTAAACCACGAAAACAGTGAGCTGAAGTA  
GGCCAACTTTTTATGGAATGTAAGGATCTACATTAACTTTCAGTTGTAATATTTATGTTGCATCT  
ACCCTCAAAAATAGGTAGTAATGAGAAAATAATATATTTATTAACAACATGCCAGGGATATGA  
GTAAC

>chr9\_43183604\_43183804

TTAGGGACTTTCAGTAATGCACCATTTCATTTGGGACAGTGATGTGACAATTCTCAGGCAAATGTG  
GAAGTAGATGTCTATGTCAATTTGTGAATATGTAGAAAATAAAGAGTTCATTTACATCAACTGTCCC  
ACCTCTGTCCCATACCTCTCCTTCCCCATGAAGAAAAGAGAGGCAGAAGTAGAATTTAAGTAGaa  
tttaa

>chr9\_45976804\_45977004

GGAAAAAATAATGAGTTTTACAGAAGTTTTTCAGCAGAAGTTGATTGGTTTTacacacacaca  
cacacatacatgcacacaTATTTTCACACATATAAATATGTATATTTTACATATATATATGCACA  
CGCATTTGTTTCTATTTAAAATGAAAAAGTATGTTAGTCATGTGTGCCCAATTTTCTGATACAC  
TAAAA

>chr9\_72044780\_72044980

TGAAACAAAACAAAAGCAAAGCCAAATCACACCTCACATGAACACAAAATGCTCTTTGGACCAAG  
TGAAAACCTGGCTCAGAATTATAATATTACTAAAACATCTACACTGAACTGAGACGGAAGCATAAA

TATGAGGCACCTGATGAAAACACGGAACAATTCCACACCAGCCAAAAATGCTCTCAGGCCACAA  
GGCAG

>chr9\_77268780\_77268980

AAATCAGAGCTGCAGAAGGTCACTTGTATTTTTAGTAACTGCAAGCTGGTCCTCATTTTATAACA  
TCACAGTTATAAACAAGACATCGTCACCTTGCTTGTCAGTTTACTTCTTTTTTACC AAAATAAGC  
AGATGTAGCCCTTTTTCTTTCTACATAGAATTAGGTAATTTGGATGACTTGTTTTCCAACTTTGC  
TTAAC

>chr9\_90440980\_90441180

gggtagacttcagggcatctgtaaaccctctaaacatgtaatgtgtatgtaacatgtatgtttat  
ctgcatTTTTCTGGGAAGTGTGTTGATAAATTTcattagattccttatggggctcatgatcccta  
aTCAGATGCTGAAGCTAAAAGTCAGACGCAGCCTGTGGCAAATAAACACACAGATGGCTCATGG  
TGAAT

>chr9\_96553379\_96553579

tgaattattcactgctgatgTTTgtgTTTTgatcTTgtaccctgcaactTTTTcttaatttattag  
ctctagtagctttcttcttaattcTTTgggattttctacatatagaatgatgccacttTgtgaata  
caggtagctttatttctTTTTTTTTTTTTTccaattttgaaatcttttagttctTTTTcttatct  
aatag

>chr9\_103754579\_103754779

GCTAGAAAATAACTGCCCTAAATGGGAGCAACATTACTTTTTAGACTTTGTCATAGATCTGGGA  
TTGGGAATTAGATGTTGTGTCAGGACCTTAATTCTCAAATCATGACC AAATATGAGAAGGGCCAG  
CAACTTACCTAAATCCAAGTTTCAACCCAGATAATCTTATATCCCCATGAAGAGGGGACAATTT  
TCATG

>chr9\_109147779\_109147979

AGTTCACTAATTCAGTTTTGGAAATTTAAACCAAATATTTAAATTAAGAAGATAATAAATCTCT  
AACCTCCATATGTTTCAGTCTTTTCACCTCCCAATTAATCTTTTTTCATGTTGATATAATGCTCCTT  
CTGAAATATAACTGAAATTCAGTAGCTTCCCTAAACGAAACCTTCAATGACTTTTATACCATTTCA  
TAAAT

>chr9\_122080379\_122080579

taagcctttaactTGAAATGATCTTTAGAAAAGTAGCTACTCTCGCTCAgctgcatgactgtgga  
cagtcatgtcccctctcaagacctcagatttttATGTCTTCCATGTGAAAATGTGGTGAGGACAC  
AAACAATTTGTCAACTGTAAACCCATCTATATACATGATTAATATGACACCTCATTTGTCTACT  
TTTCC

>chr9\_122377579\_122377779

TTCCCTGGACTTAACAAGGGAGAATATGATTTCCATTAATATCAGTGGTTCTTAAACAGGTGGAA  
TGTTGTGAATCCCTTTTAAAATATGAAGCACCATTATAGATTATGTCTTCCACTAAATGCACAAA  
ACATAAACTTAGTACATAATTTTAACTATTTTAAAGAATGCCTTCATGACTCTTCTCTATAAAT  
CCCAC

>chr8\_31749858\_31750058

TTTTTGTTCATTTCTGTTTTAGTAACTCTTAGAAAAAGGTAGTATTAAAGGAGACCTAGGTCT  
CTTTTACCAATTTAGGATAACTTCACAATCTCCGCAGATAAATTTGGTATCTGTGTACACACAAA  
AAATAGGAAATCTTGTGAGTAGTTTACAGGGGAAGTGCTTAATATATAAACAAGGCAGTGCTCT  
GGTAA

>chr8\_34610858\_34611058

AAAAAATAGGTTGTTTTTCCAGCTATCTCTTATCTCCAGTAGcttcctttacttaaatcctttg



ctgtgagactttgccacgcctgccaacacataaagtatatgcccaggtgcccgttgactttgggct  
tgcccatgtggattacttagaccagtagaataatgggttgagggtgacaatgtatcagcttgagtg  
gaaga

>chr8\_65245446\_65245646

ATTTCTGTTTCTCTCACCACCATTCTCCCAGAGCTATAAAAAGGGAAACCTTCAGAGTCATCTTT  
TATTTCTTTCTTTCCATTCTCTCCCCTCCCTCCTGCACTAAATCAGTTTCAAAGTTATAGGC  
ATGCTATCCTACATCCATCTCTTCCCTCTCCATTCCAAACTCTGTAACATATTCAGGCCTTCACTG  
TCCAC

>chr8\_65555646\_65555846

tatatatacacatatatacatatatacatatatacatatatacatatatacatatatacatatataca  
atatatacacatatatacatatatacatatatacatatatacatatatacatatatacatatataca  
agcataccttgaagatactgcaggttcagttccagaccaccatcataatgtgaatggtgcaataa  
agcaa

>chr8\_74959446\_74959646

TTTCTACATAAAAAGATTTGGTCCTGAATTTGTGAAAGAGCCCGTTTTCTGCACTAGAGGGACTA  
TTTCTTCCTTAATATGCTTTCTGGCACAGTAGCACAGACTCCAACATCATCTGACTTCCTTGAC  
AGCCAAGAAGGTGTGGTGGAGTCTGTTTCTCTCACTGTGCTTCTGTCCCCACAACCTTATGGGTAG  
ACGTG

>chr8\_75997245\_75997445

TGTCCCAAATAGAGACTGTTTGAGTTTATAGTAGTCATCTCAGAAGGAGTGGCTCACGAATCTCC  
ACTTAAGTTTGTGACTTGGCTTGAAGCTTGGAAAGAAAATGTGCCTACTTTGGGAGCATTCAAGC  
AATGGGATCTTGAACCAATTTAATTGCAACTTTCCTCACACAAATATATAACTGTTCTTTGCAC  
ATAAA

>chr8\_76461445\_76461645

TTGATATATTTCTCTTTTTTACACTAACAGCATAGTAGCAAGATTAATTAGATGGAAACAAATAG  
AAGCATAGTTTTATGTCAAAAATGATAGCACTGAGATTATAAATGTTTACAATATCTTTTAGCAT  
TTTTCTAAAGAATAATCATGTAAGTGAATTCATAAACGCTTAGCTAACATCTTAATTTTTTATC  
TCTGC

>chr8\_76994645\_76994845

cctcttaataaccaccacaggggaagattaagtttgaaacataaattttggagaggacacatattca  
aaccataCTATTACTcccccgccccacaaattcatgttcttctcacattaaaaatgcatttat  
tccatcccaataaccccaaaagtctaaacttacctagcatcaactttacagtctaagtccaagt  
tcat

>chr8\_91110224\_91110424

ggctctggaagctctcagtgagagggtagctcctctctgctgcaggtcgtctctgcagctctc  
ggcggagaggggtgctcttctctgcagttagtcgtccattgtctccagctatcagcagagagggg  
acgtctcattgaagctggtcaccagtcctcatgaactctctctactctctgggtcctctggccat  
actct

>chr8\_94040424\_94040624

TTTTAAATATCCCAGTAAAGTCCAGATACACATATTTACCTGTTTAAAGAGTTTTGCAGGAGT  
GTTCAAGTGCTTGTGGTAATTTCAATCTAGATCTCAGTATCTTAACTGGAGGAAGGAATAGCAG  
AGAAAATACAGTACAAAAGCAAGACTCAACTTCTGCACACAAAGAGAATACAAAGAATTGTCTT  
AGGTA

>chr8\_94179624\_94179824

TGAGGACCTACTTTGTGCTAGGAACTTTATGTAAATGTGTTCTTTTAGTCTTTATCACTCTGTAA  
TATGTTAGTGTACTCATTATCGGTGTAATTCTATGTATATAACTCAATAAACTGATAATACAAA  
AAGAACTTTTAAATTGGTATGCCACCTCACCAAAGCTCTTTTATTTAGTCATGAAATTCATA  
ACTAA

>chr8\_112761024\_112761224

actatactttacttagctccttttggactgctggttgcttcaagtaaccagaatcacacaatcaa  
aactgcagataagaggggaactactgtaatcacctatttctctctctctctctctcacacacac  
acacacacacacacacacacaagatgtatcattaggtgacaagaaaacagctataaagagaat  
aacat

>chr8\_114757624\_114757824

CATGTATGCattttatTTaaagataaatcttatttataaaaataaaCTTCTTGCAATGCTAATTTAT  
TTAGAATTTCTATCTAAGAAACCACTATGTAGCTAGGCCATTTTAGGCTATAGAGTCATAGATAT  
ATCAGGGTTCAGTGATTTTAAATTTAATTCTAGGGATTTATTTTACAAACACATTTTGTGACATTC  
CTAAG

>chr8\_134904418\_134904618

AACTCTCATATTAATAATCGTTATGCTGAATACAGAGCTCTAGGCTACCATAACAAGTGCTCAAA  
AATGGATGCCTACTATTTATTGTTTATATTAGATTGTTAATCATTCTCCTCAGCACCTTCCTGA  
TGATACACCATCTTTCATGACATCTGTTGTTGGGGAAAAAAGGTCTACTGAACGTATAATTGCCA  
TCCCT

>chr8\_137170818\_137171018

AAGGACAAGCTTCCATCCAGATAATCCAAAGGGCGAGGTCAATAAAAAAAGCCCAATCAGAACC  
CAAGAAGTCAGAGTAGTCAGAGTGAAGGAAAAGGAAATGGAGTGGCCAAGAGAAGAGCCATAGAC  
TAGATTTGGATTTATGCTGTCCATTCAGTCTTTGATTAGCTGTGATGGCAGtgaaatgggaa  
tgttc
