# Supplementary material for: iEnhancer-EL: identifying enhancers and their strength with ensemble learning approach
Source: Oxford University Press journal article supplement (doi:10.1093/bioinformatics/bty458), 2018-06-06
Supplement: bioinformatics_34_22_3835_s5.pdf [file bioinformatics_34_22_3835_s5.pdf]

**Supplementary Information S2.** The physicochemical properties of dinucleotides in DNA.

| Dinucleotide | Physicochemical property |      |       |       |       |       |
|--------------|--------------------------|------|-------|-------|-------|-------|
|              | Rise                     | Roll | Shift | Slide | Tilt  | Twist |
| AA           | 7.65                     | 2.26 | 1.69  | 0.026 | 0.020 | 0.038 |
| AC           | 8.93                     | 3.03 | 1.32  | 0.036 | 0.023 | 0.038 |
| AG           | 7.08                     | 2.03 | 1.46  | 0.031 | 0.019 | 0.037 |
| AT           | 9.07                     | 3.83 | 1.03  | 0.033 | 0.022 | 0.036 |
| CA           | 6.38                     | 1.78 | 1.07  | 0.016 | 0.017 | 0.025 |
| CC           | 8.04                     | 1.65 | 1.43  | 0.026 | 0.019 | 0.042 |
| CG           | 6.23                     | 2.00 | 1.08  | 0.014 | 0.016 | 0.026 |
| CT           | 7.08                     | 2.03 | 1.46  | 0.031 | 0.019 | 0.037 |
| GA           | 8.56                     | 1.93 | 1.32  | 0.025 | 0.020 | 0.038 |
| GC           | 9.53                     | 2.61 | 1.20  | 0.025 | 0.026 | 0.036 |
| GG           | 8.04                     | 1.65 | 1.43  | 0.026 | 0.019 | 0.042 |
| GT           | 8.93                     | 3.03 | 1.32  | 0.036 | 0.023 | 0.038 |
| TA           | 6.23                     | 1.20 | 0.72  | 0.017 | 0.016 | 0.018 |
| TC           | 8.56                     | 1.93 | 1.32  | 0.025 | 0.02  | 0.038 |
| TG           | 6.38                     | 1.78 | 1.07  | 0.016 | 0.017 | 0.025 |
| TT           | 7.65                     | 2.26 | 1.69  | 0.026 | 0.020 | 0.038 |
