# Supplementary material for: iEnhancer-EL: identifying enhancers and their strength with ensemble learning approach
Source: Oxford University Press journal article supplement (doi:10.1093/bioinformatics/bty458), 2018-06-06
Supplement: bioinformatics_34_22_3835_s7.pdf [file bioinformatics_34_22_3835_s7.pdf]

**Supplementary Information S4.** The independent dataset contains 100 strong enhancers, 100 weak enhancers, and 200 non-enhancers. None of the sequences included has  $\geq 80\%$  pairwise sequence identity with any other in a same subset and the benchmark dataset.

---

**(1) 100 strong enhancers**

>Chr11\_6627824\_6628024

ATGCTGCCAGAAGGAAAAGGGGTGGAATTAATGAAACTGGAAGGTTGTGGTGCTGGTTTGAGGAG  
TAAAGTATGGGGGCCAAAGTTGGCTATATGCTGGATATGAAGAGGGGGTTAATTCCTTGCAGGTC  
TTCTTGAGATAGAAGTCCAGGCCCTGAGGTGGCAGGCAGCCTGATAGTGAACAGAACCCTTGTGC  
CCATA

>Chr11\_9587224\_9587424

GGCATTTTTAACTGTGTTTCATTTTCATCTGTGAAATGTGAATAAAAATAACTCTCTTACAGA  
GTTCCCGTAAAGATTAAATAAGTATGTAAAGCATCTGGGTCAGTGCCTATCATATAGTTGGCACC  
AAAATATTCTCCCCTCTCCCAGCTCCTGCAAAGGCACCCCAGCTCTTTGCAGCACTTAGGGCCTT  
TCTCA

>Chr11\_65187024\_65187224

GAAACCACAGAGCTGACCTGGCTTCAGAACAAGATGTGGGGCTCCAGGCACCCGGGAGACCAGTG  
ACCCTGATTGGCAATAGCCGCAAGAAAGGGCTTGGAGACAGGGGCCAGGC GCGGTGGCTACCCCT  
GTAATCGCAGCACTTTGGGAGGTCAAGGCAGGTGGATCACTTGAGGTCAGGAGTTGGAGACCAGC  
CTGGC

>Chr10\_74014594\_74014794

TTTGCATAGGGGCATTACCACTGGACTTGGGCTCAGAGCAAGTGT TTTATGAGATAAAATGAGGTGC  
CGTCTCAGAATCACAGAGCACTCCTCTACCTTTGACCTTCTGCAGGCTTTCCTACTGGCTTCTAAGA  
GCCAAGAACCTTCTCCGCCCCACCCAGCTCTCTCTCCCCTGCAATCTCTCCATGAACAGCATTG  
TTTTA

>Chr10\_105667810\_105668010

CGGGAGGCGGGGGTTGAGTGAGCCAAGATCACACCACTGCACTCCAGCGTGGGCCACAGAGCGA  
GACTCCATCTCAAAAAAAAAAAAAAAAAAATTAGCACATGAACATTTGTCTAGAGAATGCGAGGTCA  
TTCTGGTCTTGACTGTAGCCTTCCAATATTCTAGGTCTAAGCTCGAGTTGCTACCAAGTGTCTG  
TGCAC

>Chr16\_87812299\_87812499

CCACAGGCGTGTACCACTACGCCCCGGCTAATTTTGTAATA TTTTGTACAGAGATGGGGTCTCATT  
ATGCTGCTCAGGCTGGTGACAACTCCTGGGCTCAAGCGACCCACCCACCTCGGCCCCCAAAGT  
GGTGGGATCACAGACGTGAGCCAGCGCTCCCTGTCAGCGTTTCATTCCCTCTTCATATCACATCA  
CTTGG

>Chr14\_61570047\_61570247

ACTTAGCACCTGTCAATCTCCTGTCTCTGTGAAAGAGCCTGCATTTCTCCCTGTTGGGCCCGCC  
ACTTCTCCAGGATTTTTTTCAGTGCTGTCTGTCCAAGTCTTTCTTCTGCTGGAAGTGTGGGAATGG  
GAAGTCAGCTCTAGCCATGGCTACAAATAATTCACCTTTCCAGCAGCCTGCGGGTTTTCTTCTTA  
CCGGT

>Chr19\_39177160\_39177360

AGCCTCTGCTGCTGCCCTAATTTTAAACTGCCTTTTGGGAGTGTAAGTTTCTCTGT TAAAGGT  
AGTTATTTCAAGGTAGGCCTCACCATCTCCTCCTCCTGGTGAGAAGCTCTGCCTGGAGGGCTGAG

CACTGCCTCCCGCTCTGTGGGCCCCACCTGCCTTGGGTTGAGACCTATCTCTTCTGACTCTGT  
GTGGG

>Chr22\_36726454\_36726654

TTGGTCTGTTATCTTGTGTGGCCTCCAATAACCTTACAAGGTATTGTATTGTAATGTACAAAGCA  
GGTATTATCATCATTGTTTTGCCATCTTCCACACAGCGTTCTTCTGGATTTGTTCTGATCTC  
AGAGGCATCTCTTCTGGGCAGTGGGGTGGTTAGAATTCTTAGCAACCAGTGGGCTCTTTGGCCTA  
CTCAG

>Chr20\_30160339\_30160539

GGCACCGTCAGTCTGACAGCAGGGCTGGCTCCTGCAGTGTGAATGAAGCGGTCTTGTGCTCGACT  
GTGAAGGGGGGTTAGGACCTGCTTCCCAGGGCGGGTCCAGCTTCTGAGGGAAAGCCTTCAGAGC  
CTCCATCAGGCCGGCACCAGGTACCAGTTAAGCACTGGGCAGGGAACAGAAGTGGTCAAACGCCG  
CTTGC

>Chr20\_30160539\_30160739

CGCGACTTGAACCTGCTGAATAAATGGATAATGTCAAGCGCTATGGCTTAGGGCAGTAGTACCTC  
CGGTTCTTACGATCGTGTCTGGGGTCCCTGAGGAGCAAGGCAAGAGTCGGCCATTCAGGAGGTCA  
GAGTTCAGCTGTTCTTGCACAAGCAGGGAAGCTGAGTCACCCCAAACACGGGCAAGACTAGCGGT  
GGTAT

>Chr20\_45977793\_45977993

CTGGGGAAGAGAGAATGTTCCGTGGTCTGGGACTGTGACAACGCAAAGGCCCAAAAAGACAGCC  
TCATGTCTCGAACCTAGTATAAGGAGAAGATTTTAGGAGAGTTCACGTTAGGAGGAGAGGACT  
TAGGATGGGAGCTAGATAGAATGGAAAAGATTATAGTTCAGAGTTAAATTATAGGGCTTGGAGA  
CGAAG

>Chr7\_104585764\_104585964

TTCCCAGGGACTGGGCCTAGCTCAATCGGGAAAAGTCAGCATCCAAAAGTCCTCAATGACGCAG  
AGGAAGCCAGGAGAAAACAGTCAATGGCTAGTCATCACTGATTTCGTGGTCACAGGCCGTTAGAACA  
GGAAGGATCTGCACAGATCAGCCTCTCCCACCCCTCACTTCTGATAAAGGAACTAAAGTCCGG  
AAAGT

>Chr6\_26122621\_26122821

TGTTCTAGACTTGAATAAAAAGATAGGTAGACTACGTCTAACCTTCATCTTAAAATCTTTACCT  
GGAAAAGACCATGAGTAAAATACTTAAGGGAATGTGGAATTTCCCAGGCCACAAAAGCGGCCTGCA  
GTTGTCTAGGAAGGGAGAGTCTCTAGGAGATACAGTGTATGTGCTAAGTTTAAATGACGTCTCCT  
CTTCA

>Chr3\_177077306\_177077506

TGAGCAATTTGCAGGGTGAGAACGGGAGCCTACGACTCCGCACCTGCACTGCCAGAGCCATAAAT  
GCAGCAAATCATGGCCTATAAAAATGTCACCACTGCTGAAAGTGCAATTTTCCAGGGGTCTTCTGCA  
GAGGGAATCCACCACGGAGAGCGACCCTCGGCTCTGCAGCCTAAGAGGAAGGCCCTGCAGGGT  
GGGG

>Chr1\_150540176\_150540376

TTCCCATAGCCCTTACCTGAGGTGTGTGCCCCACTTTCCTTAGATTTGGGCTCTCATGCAAAAG  
GAAATAAACAAGGTATCCTCCCCTCAGGAAAGTTCAGTAAACAAAGCAGTGAAACCGAACAGCTGC  
TCCCTTGCAGCAGGCCAGCTGTCTCCCCTCCCCCATTTCCACCAAGGGCCGGAGACGGTGGGAA  
CTGCT

>Chr1\_150540576\_150540776

AAACCAGCTCCTCCTACCAGACAAGAAAATTAACATTTTTTTAGGGCACAGAAGTAAAGCATTTT

TACTGAAATCTAATCCAGGATGAAACCTAACAGTTAAACATTCCTTTTCCTTCTCTGCTTCTTTGG  
CTCTCTATCCCAGCACACCTTGTCCCAGGCTAACTTGAGTAAACATACACATGTGACCACATGAG  
GGCGG

>Chr1\_156717976\_156718176

CTTCTCACTTGATGGAATTTCTAACCCCTTCACCCAAAAGAGGAGAAATCCCTTCTACAGTGACAC  
CTCTATCCCTCAAGCTACAAAGAAAATGTCCTTTCTTACATTTGGAAGTGGAGGGCAGTTCTTCC  
TAGATGTAGAGGTTATGAGGTCTCAGGGCAGCCCTGTACCCCAATACAGACATCTGTCTTCCAGG  
TGGTG

>Chr9\_131903379\_131903579

TTTTGGGAACCTGGGCCAGGGGAGGGAAATGAGGGGGATAAAATGACAGGTTTTTTTTGACTTAA  
ATCTTAAAAGTTTTGTACAGTTGCCCTTACTAGAGAAGTAAGAGGCCTGCCAGGAGTGGGTAC  
CAGGTGGCAGCCCATGGCTCAAGAGTGGGGGCTCCTGAGGGCTCTTGTGGTGAAGTATGCCCT  
TTTTG

>Chr12\_6999739\_6999939

TGTATGCTAGCATGGAAGGGAATTGTTTCTTCGGTTGAGTGCCTAAAGTGCTTGATGGCCTTTCA  
GATGGATCATGTCATACAGAAAGGAAGTATCTTAAAACACTACAATCTAGTTTAAAGACATAAAAC  
AGTAGAATCGCTGTCAGCGTCACAAGATACAAACGAAGGGCTCAGAAGTGGGACCAAGAGAACAT  
AGTCT

>Chr12\_45628333\_45628533

ATTTGTTCAAGCCCTTTTCCAAGTCCCAGGGAAGTTACTGACACTGATGTTGGTTTTCTTTTAA  
GAATGACTCATGATTTTTTCGAGCCTGGTTTTCCACTCTTAGTCATCTTCCCTGCCTGAGTTAAAAC  
AGGCTTTAGGCTCTCACTGAATTCAGCCTTGACAGAACCCCCACCCCCACCCCTGGGCTTTTG  
ATTCC

>Chr11\_9587824\_9588024

TCACTGGAGAAGAGTCATCACGTCCTTTGTGCTGCAGTAATCTGAACGAAGCCAGTTTAAATAAT  
CACAATGTGGCCAGCAAACAAGTGGCAGTCCCTGTGGTCATTCAGGTCATTTCCCTGTGTATGTCA  
CTAACCCAAAAGGAGAGGCAATTAATCAATCACCTGAATATTTAATAAGTGCCTGCATTCGTGG  
GGCAC

>Chr11\_61582224\_61582424

TTGGTGCCTTTTTACAGAGCACTGATTGGTGCATTTTACAAACCTCTAGATACAGAAAAGTTCTC  
TAGGTCCCATTCGACCCATCAACTCCAGCTGGCTTACCTCTCAGGGCTATGAGACTTCCGTCC  
CTTCTTGCGGTCTTTCAATAAGTCCCTTTCTCTCTTAGCTAGGGTTCTCCAAAACACGAAG  
AGGAA

>Chr11\_65187224\_65187424

CAATGTGGTAAAACCCTGTCTCTACTAAAAATACAAAAAAAAAAAAAAAAAAAAATTAGCCAATGTGG  
TGGTGTAAGCCTATAGTCCCAGCTACTCGGGAGGCTGAGGCAGGAAAATCACTTGAACCCAGGAG  
GGAGGGTGCAGTGAGCAGAGATCACACCACTGCACTCCAGCCTGGGCAACAGAGTGAGACTCCAT  
CAAAA

>Chr11\_65187624\_65187824

ACTTGTTTTGATCTAGAGAAATCTGCTGACACCGGCCTTCCCTGCTCTCACCTCCAGCTGGGCAG  
AGGTATTTTTAGACTTATTTGTAGAGGAAGAGAGCAGAACCAGGCCCAATGTGTACCCTCCTTA  
CTGTGGGCACAGCTTTGGCCCTTAAGGCAGGACAGAGATATCCATGTGGTTGTCTACCCTCAGC  
TCATC

>Chr10\_105668010\_105668210

TCTGGGCACTGTCACCAACCCCCGGACTTCCCAGTTTGTGACCTCTCCCAGCAGACCCTGTGCCT  
TGGTGCCAGAGGTCTGGCTGCTGGAATGCCCCGAAATGGAGGCACCCTTGCAGTGCTGCACAAT  
GTCCCTCAGCAGCTACACAGTACCGCCTGGGCCGCTGGCCTTGTTCAGCTGCGGGATGAGTCAGT  
GCGAG

>Chr17\_38268274\_38268474

CCTCAACATTCTAGTTTGGATCGCTTTTGGGCTGTTTCCCTTGAAAACACGTGCCCCAGCAAGGAT  
TGAAAACTACCTATTGGTACTATGCTCACTACCTGGGTGACAGGTTTCAGTCATACCCCAAACCT  
CACCATTACACAATATACCCTTGTAACAAACCTGCATATGTACCCCTGAATCTAAAAATAAAGT  
TGAAA

>Chr19\_18475800\_18476000

ATGTCCCGGCATGTCTGAGCAGGAGGAATTCGGGGCGCCAAAGGGTTTTATGTAGATTGCTTTT  
GGACTCGCCCAGGAGTCAGGAGTTGATTTTTATCTCACTTCTGGTAACCTTGAACCTACCAG  
GCAGGGATGAGATGACGTAAACTTCCTCAGATGATGTAAGTTCAGCCACATCTTGCTGCCATTA  
GGGAG

>Chr19\_18476000\_18476200

AGAGGACGACCCCAACAGTGAAAGTAATTGAGTGAAATGCACGTTCTGGAAATCAGTTTCTATTT  
TGGCCTGGAGGAATGTGGCTATACTGCTTCCCTGAGTGTGACACAGTTGGAATCTAATCTTGTTG  
GTTTCCCAACATCTAGGTTTTTGTGTTGTTGTTGTTTTATGATAGGGTCTTGTTCTGTTGACC  
AGGCT

>Chr19\_39175560\_39175760

CTTAACCCACCCAAATGGCTTTTTGTTTGTGTTGTTGTTGTTGTTGAGACGGAATCTCGCTCTTTA  
GCCAGGGTGGAAGGCAGTGGCGTGATCTCAGCTCACTGCAACCTCTGCCTCCTGGGTCAAGCGA  
TTCTCCTGCCTCAGACTCCCAAGTAGCTGTGATTACAGGCACATGCCACCAAGCCCAGCTAATTT  
TTGTA

>Chr19\_39176960\_39177160

ACTTGGCTATCTTTTTGAAAGATCAAAGTTTAAACCAGATGATCTGTAGTCCCCACCCACCC  
TGAAACCTGAGCTTAGCTGTAAGCATTGAAAGTAAATGGGGTGTGTTGTAGCTCACCTCCCTGTT  
CTCCAGGTGAAGGGCCCCGTGTGCCTGATCATTTTCATAGCAAAATGCTAGATGGGGCCAGAGGAG  
GCCCC

>Chr19\_47612360\_47612560

TGCAACATCCATTAATTTGATTTTTAACTAATACTGGTACATCAGTCTGGGGGAAAAAAGGCAG  
TACTGTGACATTTCAAAAACAGATTACCAAATAACAGTTTTTACTTAAATTAATGAGGCTTCTAG  
GTCTTAATGGATGAGATTTCTTTGAGAATGAAAAACAATAAACCGTTGTGTTGACATGCCTGTGA  
GCTTT

>Chr6\_43141422\_43141622

TCCAGAGATCCTGATAGGACACCCTGCCCTCAGAGTCATTAGAGACGAAGGTCATTATGGGAATG  
GGGAATGACATCACTGTATAATTCTTTTTCCAACCTCTCAAGGAAGGTAGAGATAAAAAGTTTG  
CTGACCTGCCATCTCCCTCCTCACCCCTCAGGCCTATGAGCTGTCCACGCTGACAGGGACACAG  
GTGCT

>Chr2\_87785085\_87785285

CTAGAACGTGACCTGAATGTGAACTAGACATTCGTTTTCTAAACCCCATGAGACCCAGGTATTC  
TTGACATGTGTAGAGAGGATTGAAGGGCCCCGAGGCTGTCTGTCTCTCTCCGTGGGCCTGGCTC  
TCCTTGGACCAAATCGAATGCATGGGAACACACCCCCAGTTGTCTTTTTCTTTCGGTTTATATA  
ATTCC

>Chr1\_161089176\_161089376  
AGGTATCAGGGAAATAGCGAGGGAGAGGTAGAAATCTTTGTTGGACAGTGTCCCTGGGTTGCCAGA  
TATGAGGGTAGAGCCTTGAGAAGTCAGTGAAGAGTTGTGAGTGTCCCTTCCCCCAGGGAATGTG  
GACTCTGGCTGTCCCTTGGGTGGTTCCATGAGCGTGGCCAAGACTGGGAGCAGACTCAGAAAATC  
TACAA

>Chr9\_131903179\_131903379  
CTGCCCTCCTGGAGGAGAGACCTGGGGTGATTCTGAGTGAAGCGAGTGGTCCAAGACAAGGCC  
CCAGGGACCAGAGTGGGCTTTGTCTCTGTTGGGTGCCCTCGGGCTCTGCCTGGCTGTGGTGGAGC  
CTGGGAGAGAAGAGGAGGGGAGGGAGGAGCCTGTTGTCCCTGCTCCTGAACATGGGTGTTTGGAT  
GGGCT

>Chr13\_99136999\_99137199  
CCTGATCCTTCTGGGGACGTGCAAGCAACAACAGAACATCCAGAGCTCTTACCCAGAGCAAACC  
CCGCCCTCAGGACCAAGGCCGCTCCTTCCCTGGAGAGGAAGATGGAGAAATAACACAGCCTTCCCG  
CTTCCCTCCAACCTATTCCCTGGTAGCAGACGCGCTGGGTGGCAAGGCTACCCAGACACAAGGCTC  
ACCAG

>Chr12\_31901933\_31902133  
AATATGGTGGTTCAAATTAGTATTTTTCTCTTTGTAGGGGAAATCACCCAAAAGTAACAATCA  
GAACTGTTACCACCTGACTGGTTCTTGCCCACTGCACAGATAAAACCAAACACTGAGCCAGCAG  
GAGTTGCAGCAGAGAAAGAGTTTGATTATTGCAAGGCAATAGAGTGAGGAGGACGGGATACATTT  
CCCAG

>Chr12\_109085671\_109085871  
CTCACTGTCATCAAAAATAGCCCCGGGGTACATTGGGAAGTTCCTTCTGCCAGGACTTTGTGCTC  
CATTGTTAACTGGGGGTGAGCAGGGTGGCCACCCACCCCTCCCAGCAAACTGTGGATAACACA  
GTCACTAGGAGAAAATGAAAAGGCCCTTCTGTGGCACTTCATGTGGTAATGAGGCCAGGCCGTGC  
TCGTG

>Chr12\_125402847\_125403047  
CCTGCGGTATTTTTTTTCTTGTGCATGCACTAGTAGAAATATTTGGCTTTGTTTCTTTGTTTTTT  
GAAACAGTATCTCGCTCTGTGCATGCAGTGGTATGATCACGGCTCACTCTGCAGCCTGGATGTTCC  
GGATCAGGTGATCCTCCCACCTCAGCCTTCTGTGTAGGTAGGACTACAGGTATGCGCCACCACAC  
CTAAT

>Chr11\_46576224\_46576424  
TGTAAGAACAAGGGAGCTAAGTCAAAGTCAAGTCACACAGGGCTGCTGATGAGGAGAAAATGC  
CAGTCAATTGTGTTTTTTCATTCCTCTTTTAAAAGGAAGAAGAAACAAGTTTCCCAATCTGTCCC  
TTAAAGTAAAGCAGACTGAGACAAAGGTTACCAACAATAGTCTTTGTGATACCGTCACACAGTCC  
CCAAA

>Chr11\_47290424\_47290624  
AGCCCTCGCTAACACTGTGCTGTGTCTGAAGATCATGCTGACCCACAAACGGATGGGCCTGGGG  
GCCACTTGTACAGGGTTCTCCAGAGCCCTGCCCATCCTGCCTCCACCACTTCTGTTTTTCCCA  
CAGGGCCCCAAGAAAATTTCTCCACTGTCACTCTGTGGTATGGCCATAAATGCCTCAGCGCCGCC  
TCACT

>Chr11\_62320424\_62320624  
TTCAAGCCCAACCAGAACCCAAGTTAAAGCTGGTTAGAGAACAAGAGACATGAGGCTGTCTCCAG  
AGTACCGTCTGGGAGGAAAGAAGGCAAAGAAAGACTGTCCAGGCAGGTGGAAGGGAAAGAAATTG  
GGCAGGGAGAGTGGGGCAGGTGGACACGATGGGTGATGGCTGGATTTCCAGGCAGAGTTAGGGGTG

TGGGA

>Chr11\_62323824\_62324024

AAGGATCCAGCAAGCCATGGAGAGCCCAGCGGGGATGGGAAGGGCAAGAGCCCTTGCTGCAGTGA  
CTCAGGCCTCCCTGGGGCAGGGCGGGGACAGAAAGAACTCCAGATGTGCTTCCCCTTTCCTGCC  
TCACATCTGCCGTTAGAAACTTCCACTGTAACTCTCCCCTACCCACCACAGCAGAGAAGCCCT  
TGCAT

>Chr10\_103911610\_103911810

TCTTCTGCAGCAGAGGCAGGAGTCTGGAGGCTGGGATGGTATCAGAAAGGGCCTCCCTGGGTATT  
GGAGGCAGTGAAGATGAAGGGCGAGAATCCATTGGCCGTGCCAGTACGCCATGGGGGCGGTTGGG  
AGATCTTGTAGAACAACCTGTTTCGAGCCCGCTTGTCCACTCATTACTCTGGAATCCGAGTCCCAGC  
AGGGG

>Chr17\_7486676\_7486876

ACCCGGCACCTAAGGAGGCCTGCCCGGTGCAGACTCTCCTGCTCCCACCGGCGCCCTTCCCTCTA  
GAGACGCTGAGAGAACGGGAGCTAGTAGCGCCCCACCCAACGCCACCTCGGAGACTCCGGCTCC  
TTCTCTCTCAACTTCGAACAATACAAAGTGTGCTAGGAGAAGACAAGATGGCGCCCAGCAGGAGG  
AGCGG

>Chr17\_33390687\_33390887

TCATCTCAGGAACCAAGAGCAGCGGCTTTCATGTGAAGTGAATGGTGCCGCTGGGGATGTATCT  
TTGGTAAGCAAGATTGCAACACAGCAGGGAGTTTACCCAGGGCAGTGTGACTCACGCTGGGCAA  
AATTTGTACTTCCCAAACAACCTCAGCCTGAACCAACCGCAGTCAACTGCAACCTAGGAAAGAAGA  
GGCAG

>Chr17\_38270274\_38270474

CTCTTTCCACGACATAGGCATTCCTTCAAAGAATGTAGGTCATAGAAATGGAATTCTGCCATTC  
TATAAGCCTTAGAGGGGTGGTGAAAGTATTGGCTTTTAACTCTTTCATACTCTTAGCCAGAAGG  
CAAAAAGAATGGTCATTATCTCATTAGGGACAGAATTGCTTAGGGAGGCCCGACACTGTGGCTCA  
ATCCG

>Chr17\_42172674\_42172874

TGCCCCGCTCCCATTTCTCAACACCGTGCCCCATGCAAAGCCTCATACTAGAAGAGAACTGAGGC  
ACAGAGGTTGGTTCTAGGACTGACAGTGCCCTTGGTAACCCAGGAGAGGCTGGTGGAGACCTTC  
TGGATATCTCTACCCTCTGTCCCCTTCTGGGGCCTCATCCCTATCTGGGGCAGACTGGGCAGGAG  
GGAGA

>Chr17\_57923218\_57923418

AGGTGCCAACTGTTTGCTCATTCTTTGACCCACTAGCCTTGCAGTTTGCTGTGTGGGTGTTGA  
TACTCCTAAATTAAAGCAGGGAAGGGGTGGTTTTAGATGGCTTTTAAACACCTGCTCTCACCCAA  
GCACCCTGGATTCAATTTGATATCTGGATTCTAATTCTGTAGTCAGGAGACTGGCCCAAACCTGTGG  
CCCAG

>Chr17\_57924018\_57924218

GGAGGATCTTTCTGTGAACTTGCTTTGATGACCTCCACCCAAAGCCCTTTGAGGAACAGTTTTGT  
TTATTCAAGGAGCCCTTGGCAGGTCACCTCCCTACCACAAATCTAATCCAAATGCGACATTT  
TCCTTTGAGGCCATCTATCCCTTTTGGGGGACAAAACACATCAGCTTTTCCCTTCAGACCCTTT  
TGACT

>Chr14\_23476760\_23476960

GGGCCCCGAGGATCCCAGGCAAAATCAACAGAGTTTAGTTTTGCTTTGCTTTGGAAGGCCAAGC  
CAACGATATATATGTGCGAGGAATCTCTCCTTTCTTAGGAAGAAAAGCAAGAACAGTGGATAT

GACCCTACGTTTCCTGGATGTAGAAATCAAATAGCCTAGGAAATCAGGGATACGGGCTCTGCACTG  
TTCAG

>Chr19\_18476200\_18476400

GGAGTACAGTAGTGTGATCATGGATCACTGCAGCCTCTACCTCCTGGGCTCAAGTGATCCTCCCA  
TCTCAGCCTCCTGAGTAGCTGGGACTACAGGCATGCACCACCACACCTGGCTAATTTTTAAATTT  
TTTATACAGACAGGGTTTTACCATGTTGCCAGGCTGGTCTCGAACTCCTGGACTCAAACCTGATC  
CTCCT

>Chr18\_3603200\_3603400

CTTGTACCCTCAGGCACCTGGCTGCGAAGTAATAAAACGGTTGCCTTATCATCTAAAGGTGGAG  
TGAGTCAAACCTCAGCCCAGGGTAATTATAGTAAACTGAAATTCCTGTCTTTACAAAAAAAAA  
GGCGGAGGGAGAGAGAAAGGAAAAGGGCTTAAGGCAGGAAATGTGTTTGTCTTTCTCCTTGGAT  
TTAAA

>Chr22\_30592000\_30592200

AAACAAACAGAGAGACTGCCCTTTCTGTAAACTCACCGAATGTCAAATATTGTTCACTCGCATGG  
CATTGGCTTACTAAGCCACTACAGAGCCACTTCCCTCACGTAATCCCCTCAATCCAAAGGCACTT  
CAACTTGAAGAGGATCAACTGAAATAATACACATTTCTCTGATGATTGGACAAGAGGCAGCCGA  
TGGA

>Chr6\_7147201\_7147401

TCTTAACATCACATGCATTTTGTAGTTTATGGTCTCCAGTCTCCAGCTGTTTTTGGAGCACCTTC  
TAACTTTGAGAGGGTGAGCTCTAGCCTGTAAATGGACTGTGGGTGGCTCGTGGAGAAGGTGCC  
TGGTGTGCTTTTCTGTGTCTCTCTGGATTCTCCCTGAGCTGTCCACCTCTGAAGCCTGCTTCA  
CTTCA

>Chr3\_39192196\_39192396

AGGCTCAGATACGCACTGCGGCTCTGCCTAAGGGATCGCCACAGAAAGAGAACTTAAGGTGAGGA  
GGTTATGACCTCCAAGCCTACAGACAGGGAAACAGAGACACAGGGAAGCTACGGTCATGCTGCAG  
GTTCTAGTGATGAACAATCCCCTCCAAATCTGCAGAGCGGGAATGAAATGAGAAATTACCTCCTC  
CCTGA

>Chr3\_133291510\_133291710

TCAAGGCCCAAGGGTATTTAAATGGGCTTTAAACCCATTTAAACCTGGCTTTGCCTGGGCATT  
TTGGTCTCCACCCTATGATAAGACAGTCCCCTCCTTTTATCAGGGATAGAAGCTAAGGATAAAC  
TGTATCATCATCTAGACTCAAGTCAGGGCGTTAAGCAATGTGCTGAGCAGCTAATAATGTTGACT  
CTCTT

>Chr2\_70313096\_70313296

ACTGTGGGGACCCAAATTATCCCTTGATACTGCCCCCTATTATCCACTATTAAGCTTTAAAAAG  
GCGAGAGATTAATATTGTGCCACATTTTACAGTCATTCGCGTTCCCGTTTTCAAATTAAGGGA  
GGAAAACGCGTTAAATTAGGCCTCCGACCTTCAGACCAGCCTGTGGGCTTTTTTAAAGTCATAAA  
ACTCG

>Chr2\_216980155\_216980355

GGATGCTTGTCTAGGCGGCAGATACCTGCCAGCCAGTATGCTACGCATGCTTGAATCCAGCAGC  
AGGCACCCAGACACCGTTAGTCCATGTACAACCTGGGAATTGTTGTGTTGTTTACAGACTAAAGGA  
TTAAACAGACCCTACAAAAATGAAGAATGACAGAATTCCATTATCTCTCCATACAGCACTCTTCC  
CCATC

>Chr1\_23881813\_23882013

GACATGAATTTGAATTCTGGCTTTGTTACTTAGAAGCCGTGTGGCCACCGCAAGTTACTTCGCC

TGTTCTGAGCTAGTTCATTTATAAAAATAAAGACACCTCCCAAATGTCTGTATTTACAGCCGATG  
CGATCAGCTCTGAATCCGATCGCATGCGACAATTTGCACAAGACACTCAGCAGTGAATCTTGTAG  
TTAAG

>Chr1\_36852813\_36853013

CAAATCAAGTCTGATGGATTCCAAAAAAGTTGGCTTTGAATCCCTGCTGCATCACTTACAAGCTG  
GGTGACTATGTGCAAATTGCCCAATCTTCCCCTTCTGTCCAAACAGGGATAACGCTTGGGGGATC  
ACTGTGAGGACTCGGAGTTATAGAAACAGCTTTTTTGCAAGACCCAGCGAGCACTCATACTCATCT  
CAGTT

>Chr1\_156075576\_156075776

TTAGGTAGGATGAACAACCTGTCCCTATTTTAGCATTAAAAGTCCCTTATCTGGCCAGGCACGGTG  
GCTCACGCCTGTAATCCCAGCACTTTGGGAGGCCGAGGCAGGCGGATCACGAGGCCAGGAGACCG  
AGACCATCCTGGCTAACACGGTGAAACCCCGTCTCTACTTAAAAAAAACAGAAAACAAAAACA  
AAAAA

>Chr1\_156093176\_156093376

GACTGCCTAGGTCCTCCCTCACTTCTTCTCCTGACCTTGGGGTGTGGCTCCCCTCTCTCCAGT  
GTCCCTCAGGGTTAATAACTATGTGCCACCAGATAGAGAGTTAAGGGGCTGCTGAATTTGGCTTCTT  
GTGAAGGGAATCCCCTAAATGTCCCTCGTTTTGGTCACTGGCCTCCCTCCCGCCCCCTTCAGGAC  
ATTCT

>Chr9\_99182979\_99183179

ACTGGGCAGAAGGTGATTCCAGGAGCAAAGCTGAGGTCATACCAGATCTTTGCTTGTTTGGCTCC  
ATTTTCATGCAATGAAGAAGCTGTCTGAAGTGTATGGATCATATTCCTGATGTCTTTGTTCTGTC  
TCAGATATTAACAGCCCATAATGTCAGAGGCCTGTGAACCAGAGCAACTCCATTTTAAAAAGGAG  
CTGGG

>Chr9\_136008779\_136008979

ATGCACCCCTCCTCCCACCCACGTGGTCCCTGGCCCTGCCTCTGCCGCCAGCCTGGGGGAGAGCA  
GGGTCTTTGTTCCCTGCTGGCCAGGCCGCCACGTGATGCGCCACATCACTGTCACTGCCTGGAAC  
GAAGACTGCCATGGACAGCCGAGGCGCTGGGGCCTGGGGGTGAGGCCAGTTGGAGGAGCTCCACC  
TGCAG

>Chr12\_56520333\_56520533

ATAGGTCACCCTCTCCATTCCCCATTCTCAGGAACCTCCTTGCCTACTCCAGTGCTTGGCAAAT  
TTCAGTTTATAGAGAGGTTTCTCTCTAAGGTTTCATCCATGTTCCCTTCTGTAGTTCTGCTTTATCA  
GTTGGTGAGCAGGTCACCTATAATTCCTCCAATTTCCCTTGTTCCTTTTCTACCTGCTTACCTC  
TGGGA

>Chr11\_47429024\_47429224

GGGAGGCTGATGAGGGTCAGAGACTTAAGAGACCTGTACTCAGTCGCTATCTCTGCCCAAGTGAG  
TACCCACATGCCCCCTTCTGAATCTTCTCCTGTACTGGCTGATTTCCAGAGAAGAATACAACTC  
GAAACGCCAAGCCAGACTCCCCTGCTGTTTCCAGGACCTAGACGTGAGAAGTGGTATCACATACTC  
TGGCT

>Chr11\_62324024\_62324224

CCCACCCCATCTAGAGGCCAACGGCCAGCCTTCCCTGGGGCCACAACCCTCTCGTCTTGGAGGCT  
CCTCCTCCTGCTTGTGGGTACTGGCCCTAGCCCAAGTGCAAGCACTGCTTCAAACAACAACCTGG  
CCACCCTTACTCTGCACCGCGTGGCGAGGGCTGGAGGCAGGATGTGCAGATGACTCACTCTTCCCT  
GCAGG

>Chr16\_21513899\_21514099

CCCTGGGGTGC GCGCGCACACAGGCGGCCCTTGGATTACGTGTGCCAGTTTTCCACTTTCTA  
CGGGGCGGGGTGAAAGTGAAAATAGTCAGATCGACAGGTGGATATCCACCTTCCCAACCTCCAC  
CTGAAATGTGCCCATCGAGTCTTAGCACCTTTTACCATTTCTTCCCAATGAAAAAACTAAACGA  
TGGAA

>Chr15\_89181396\_89181596

ATCTGGGGTAGGAGGCAAGCGTGGGTAACGCTCAGCTTATTGTTGGATCTCACCACAGTGAAAGA  
CAAGCACTTCCCTCATTGAAAGTTGATTTTCTTTTTGCCCCAGTTGTAACCTATTTGACATTCAC  
TAAATACCAAGCCCTCCCTATCTGGCAGGCACTGTTCTAAGAGCTCAAAGTCTTAGCCTGGGAGA  
GTGTG

>Chr15\_93460796\_93460996

CAAACAAGCAAAAAGAAAAAAGGTGTGACCAGTCAGTCTTCTTTGCTTTTCCATCTTAAGACA  
CATAGAAGTGA CTGAGAAGGAATAGTTATGCAATGACATCGGTTTAATAATCAGTTCAACTGAAG  
AATGTATGTAAATAAGGGCAGTGATACCTAACGCTGATAGTTGATAGTGTGGATTGCATAATTCA  
GACTG

>Chr19\_11253600\_11253800

CCGTCTCTTCCCTTGGGGAAACTGAGGCCAGGTTGCTGGGGTGGAGGGGATGTGGAGTGACAGGG  
CAGGGCAATGGCTCCTCGGCCCTCCGGGAACAAAGCCAGGTCATTCTGTGGGGAGGGAGCGC  
CAACCCAGGGTTGGGGGGGCACGGGCCCTGGGTACAGGTTACAGATAAGCCTGGGCTCCCAGA  
ACCT

>Chr19\_11254000\_11254200

AAGGAATGACCGCAAGGTGACAGCAGCGCTTAGCCAACCTGGCGCTGACACCTGACTTGCAAA  
CTGCTCCCTGCCTGAGGCTTCAAGGCAGGCGAGAGGCTTTGTGTGTGTGACTTCCCTCCCGAAGG  
GACACTGGCAACAGCTGGAGACATTTCTGTGTTAAGGCTGAGGGGAGCTGCTGGCATTGTTGGT  
GGTG

>Chr19\_39173560\_39173760

AGTCACATTACTCCGTGTTATGGTACCCATCCCTGTCTCCTTAGCTTGTTTTTGTCTGTATTGGC  
TCTTCCACTAGACTGTAAGTTGCATGAGGGCAGGGATGTCTGTTTAATCCAGTGCTCAGGATAG  
TGTATGGCTCGTGATAGATGCCTAGTACATTTTAAATGAGAACGAATGAAGTTTGGGAGAGGCT  
CAGAG

>Chr19\_47611560\_47611760

TAGAATCTGGTTTACTTTGATAGCTATCCACGGAGACCTGGAAATAGTTTCATTAGCAATTTTCA  
CCAGAGGTATTTACTGTAACCTGGATCTGACCTCTATGGAGAGATGTTTCTACAGGCCCAATAGCC  
ATAAAAAATGTAACAAAAGGAAGTGAAGGACCCTCAGACAGCCATTTCTCTCCCATCAGGGAAGAA  
GGTAA

>Chr21\_45148172\_45148372

TTGATCAGGGTGAAGCAGTCACATGATCTCTCCTGTCTCTTTCCCTCATTCTGGTTTCCTAAAGT  
GGTCAGAGGTCTCTGCAAAATAAGCTAAAGGGAGGGTTCTGCTGGGTGGGTGGCTTCGGCTTCTG  
TGCAGCGCTCACCTGCTCTCCCTGGAACGCCTGGAACCTAGGGTGGTCAGGCTGGGGTGGAGGA  
GCTCC

>Chr3\_141086910\_141087110

TTCCGCATCTCTTTCAATACCACTGCAACTCCTTGAGTAAGGTGGGCACCACACAGAAGAAGGGG  
GATGGCAGAGGGCAGTGAGAGGTCCCCAGGGAAACACCCCTCTTCTTCTTCCCTGCTTCTCTGAC  
AGAGCACGGCCATGCCTCTGCCATGCAGGAGGGTGTGATGTCTTTGGGGAGGCCTTGTTGAATCTG  
TCTGG

>Chr2\_43448296\_43448496  
TTGGCCTCGGGCTTCCCTCTCCCCTGCTGCTGAGGCCTTCAGTCAGGGGCTGGCATCTGGGAGAAC  
CTTGAAACTGTTTCCCATCCCCCTTGGCAGCAAGCAACAAGCACAAAACGCTCCAGTTAACACC  
AGTGCAATCATCGTTAACGTGAAACAGCTGCCCCGAGGCCTGGCGTATCCACCAGACCGCCCCCTC  
CCCTC

>Chr1\_28835213\_28835413  
CTACAGCTTCCCAGAGTCCTGTGGACAATGACTGGGGAGACAAACCATGCAGGAAACATATCTAG  
TATACTAGATTTTAAGTTGAAGTAGGATCTTCAGGAGTCTAATCATTATTTCTTTTCTTTTAGGA  
GAGAAGACGATCTGCACTTCGCATTTTGGCATTGACATTTAATTTTAGGGTCCTTTATATAGAAG  
GGAGA

>Chr1\_38465813\_38466013  
CTCATCCCCCACCCCGCTGTGTACACCAGCTTGGACAGCCTTGGCCTGTAACATCTGCAGCA  
GCTGTGGCGGCACAGATGGCCAGATGTCAGGTTTTGCCAGCAATGGGGAGAAAAAGGAAAATGA  
AGTGTGGGGGAGGCAGAGGGGAAGTGGAGACAGACTGGGAGTGCAGTGTACCCCTGCCACCTC  
CTGCT

>Chr1\_110546677\_110546877  
CTGGTATTGCCTCACCTCTTCTCGCCGCGAGCATTGACAGAAGATCTAGTTGAGTCCTACTTTGA  
AAGGAGTATTGCTTCTGACTGTGGAATTGGATTCTAGCTGTGTGTGTGTTATATCCTGTTACTGT  
TGAGACACAGAGGCGGGAGTCGGCGGGGAAGATATGTGCTGAGATTAGTCAGCCTGCCCTCCCT  
CTCCC

>Chr12\_76338533\_76338733  
TCTCAGAGAAGGCTATGGTCAGAAAATGGAAAAGGAAACAAGCCACAGGCTCATCTTCAGATGAG  
GACTCTGCACAGGGCTTGACCTTTCAATCGAAGAACAACCACAGTAGTATTCTGAGATGGCCAAG  
TGTATGGGAAAGTACTGCTTCTCTCCCACTCCAATGTCTACTGTAAGTCTTGTTCAGCCCCGAG  
ACAGA

>Chr11\_62389824\_62390024  
ATCTTCACCTTATTCATCCATCCAGTCAGTCACGCCACCCAATAGCTGTTGCTCAATACTTATTA  
CACGAATGAAATCTAAGGCCACCACATGATCCTCTGGGTGTCTCTCCTGGAATCCTCACTATAA  
TACTTTGAGATAGATAAGAAACCAAAGTTGACAAAAATTATGTCATTGCCACAGGGCAGTTTTGT  
GTCCT

>Chr11\_65255824\_65256024  
GCCCCTGAGGAGGTGGACATTTAGGCTGAATGGAGGACAGGGAGGTAGCAGGACCTGCTGTCTCC  
AGGACCCCTAAGTTTCTAGGCCAGAGCTGACGGCTGGTGGGTGCAGTCAGCCAGGCTCCAGGGAA  
GGCTGCTCCAGGCAGGGCTGAGTCTTACGGTTCAGCTTTTAGAACTGGCCAGGTTGGAATTCTG  
GCTGG

>Chr17\_38267674\_38267874  
GAGTGGCTCTTGGGTCCAAAGGGCTTCCCCTTGGCCAAGTCCCACCCCAAAGCCAGGAAGTCCA  
CAGCTTGGCGCCAGTCAAGGCAAAAACATTCCTCAGGACTCTGACAGGCTGGGGGATGGTTCCC  
ACCACGAGGATGGGGGAGGGGAAGGAAACACGCGGGGAGGAAATGACCACAAAGAAGGGGGTGA  
GGGTA

>Chr16\_87812699\_87812899  
CCCCTCACCCACCCGCCACACCTGCCAACTTCCCGCCTGCAGGGTGGCAGGAAGCCTGAGGCA  
TTATTCAGCTTCCCTTAGGGCCCGTTGGCTGATGCAACACAGCTCAGAAGTTGAGTCCAAGCACCA  
AGCCCCAATGTCTGCGTCGGCCGCCAGGGGTCACTCCTCCCGCGCAGAAGGCGGCCTTGGAGCC

TCGCA

>Chr19\_3983800\_3984000

CTTCCCAGCGTCCCAAGCACTAGAACACCCTCCCCTCCCAGGTGTGACAGCCAAACCTCTCCAGA  
TATTGTAGGAGTGGGGCAAGTCCCCAGGGAGGGAGAACCACGGAGTTAAGCCCCCTCCTCAAG  
AAAACCTTCCAGCTCGCAGTACCCCGAATCCCTGTGCCTCTCCATCCTGTCTCGCTGGACTGAAC  
CTCAC

>Chr19\_18485400\_18485600

GTCCCAGCCCTGCTGACTCATACTCAGCTGCCACGGTCCGCTTTCCTGCTGAGCACGGGGGTGG  
GGCGGGGGGAAGAGGGGGAGGGAAAGGGCACCTGACCGAGGCCAGAGGCCAGAAAGGACAGAA  
GGTCATGGCTGGGGAGAAGCAGGCAGGAGAACCAGTCTTGGCCTTAACCTGGCTGGCAACGTAAA  
ACCTG

>Chr19\_39177360\_39177560

GAGTGCAGGCTCTTCCCCTTGGGGAGAACCAGTTCTTTGACGTATAATCTGAGTGGTTTGGGTT  
GGTTGGTTGGTTGGTTGGTTGGTTTCCCATGTGTGGGATGGCTCCGGAAGTCTGTTGAGAACAG  
AGGCAGGCTCAGATGGGAGCAGCTCCTACCCCGGGCCGCCTATCCCCCTTTACCCTGGGGTTTCT  
TTTAG

>Chr22\_36767054\_36767254

TCAAAGCAATTAACAACCGGTAGAGCACCGTCCTGGAGGGCTCCTCCCCAGATCTGAAGGCAT  
CCACAGAATGTCCCTGGATCAGAGAACCCTCTGCTGACACAAACACACTCCCCTACTCCCTTCTT  
CCCTGTTACAGATTGAATTGTGTCCCTCCAAAAATATCCATTATGTTGGAGCCCTAACTCCCAG  
TACCG

>Chr20\_30307539\_30307739

TTCTCTGGTAGGGGTAGCCTTCTGCAGAGGCTGGCTAGCAGACCAGGCACCTCTCCCAGACTGCC  
TTTTGTTTATAGCTGGCAACAACCCACCTGGTATTAGGACCCTGGCCAAAGACAATAGTCAGGC  
AAAGTGGGCAAGCAGCCTCAATCCCTACTTGGAGATGCCTCAGAGGGTGTGTCTGCAGTACTGGA  
ATCCT

>Chr20\_45988393\_45988593

AGAAAACCTGGAACCTAAGCCCAGAGAGGTGAAGTGAAGTGCCTGCCCCAAGGTCACACAGCTGGGAAGTGC  
CAGAGATCAGATGTCCACCCCGTTAGCACTTCACATCCCTAAACTCTGTACCTTCTCCTGGCTCT  
AAAGAAAGAAGCAAAGCAAAGCCGAACCAAGCACAGCAGAAACAATGAGGCTGAAACCTACGAA  
CAGCA

>Chr3\_133291710\_133291910

CCCTCCATCCCCCTATCTTGTAAGAAATAGTATAACCCACTTTACAGATTAGGGACTTGACGATAG  
GATTTATTGAACTTGACCTTGGTAAACATAATCCAGAGGGTGGAGTTCAGACAAAATCCCTTTCT  
ACCTACCAACCAGCCTATGAAAGATCTTTTAGTAAATGGGACCTAAACTTCAGGCTCACTGCTCC  
TCTCA

>Chr2\_43448096\_43448296

AATGAATGTGGCTTACCCCCAACATTCCAGCTGATCAAAAAGTACTTGTTTAGAAAAATAAGTTTA  
GGAATGAAGTGGAACAAGGCCTTTGAAATGCAGCTTAACCTAAATAGCACATTTTAGACTTTTC  
CTCCCCACTGCACATTTCTTTATGGTGTAGGGGCCAGGGAGCCTGCAGTCTTCACCCCTCCTGAGC  
CCTCC

>Chr1\_38465613\_38465813

CCTCCTGATCCAGAAAACAGTGAATGCTAGAGAGGTGCTGGACTAATGAATGGTAGAAGAGGCC  
AGTGTGAGAGGTTGGGCCTTCCCTCCCGGGAATCAGCCAAGCAATGGGAACCTCAGAGGCTCAG

CTTAGGTTCAAGCAGGAAGGAAATCCTGCAAGCTGGACACAGCCAGTCTTCCCTAGCTAGACCCT  
CTGCC

>Chr1\_38466813\_38467013

CCAGGGCATGAGGCCACCAGGGGCCAGGGTCTTTAGAGCTGGAACCTCTGGGCTGGGGGCTATGG  
TGTAGAGAAGATACTCCTCTTTCTCAGCCCCCTTCCCTGCCACTCAGGCCAGGTTTCTCTGGCC  
CAACATCTGAGGATTGCCTGGGCTGTCAGCCACGGGGCAGCAGGGGGCCACACAGGTGGAATGCG  
TCCAC

>Chr1\_90372212\_90372412

TGAAAAACCTGCCTGTGTGTTGTGCCAAGTTGTGTTAGCCACTCCATGTTATTCTTAGATGGGC  
TCTGGAGTATGACCAGCCTGTGTGCATGCATTTGTAGTAGGCACTGGATAAGAAGTGGAGTAATG  
ACTACAGAAGTGAACGGTACAGCTCTAACCTGCTGAGTCATCTCAGCTCAGCCTTGCTAGCAAG  
GCCTC

>Chr1\_145455643\_145455843

ACAAAGGGAAGAACCAAAAGAGAACTGCAACTCAGCCACACACTGGTTTCTGTAAGTGGAGAAC  
AGGATATTTAGGGGGACTTGCTCTGCACAGACATACTTTCAAAGTGGCATCTCCAGAGTCTGGA  
AGAGGAGGGAGTATGGTGAATAAGTCAGCTCCTCCTCCCTCCTCATACTGGTTTTCTTGCCTTT  
CCCCA

>Chr1\_156093576\_156093776

TGCCCTGGCCTCCGGCCTCAGGCTTCTCCTGCCTCTGTACAATGCCACGTTGATACGCCCAGCAG  
CTGTGACTCAGGCCTGGCCCCCTGCCAGGCCAGCACTTCTACTGGAGTTGCGTCTGAACATGTC  
AACAGGCTTCCCTATCCCTCTCTCAGCACAGTTCTCCCCACTTCAGCCCCTCCCTCTGCCTGGAA  
TTAAA

## (2) 100 weak enhancers

>hg19\_ct\_UserTrack\_3545\_11005 range=chr11:132363991-132364190

5'pad=0 3'pad=0 strand=+ repeatMasking=none\_0

TTATGGTCACCTTCGACCCCAGAAATAATGGTCTCTGTTGTCAGATTCCATTCAAATCCAAGAAG  
TTGTTGTCAATAATACTTTTGTAAATGCAAGAAGGACAAATGTCAGTTGAAACGTGTTGGGTTTTGT  
CTTCCATACTGCTGTGAATCATGCATATGCCTCATCTGCTGCTACTTATAATAAACTGCGTAA  
CAATT

>hg19\_ct\_UserTrack\_3545\_8529 range=chr11:112506991-112507990

5'pad=0 3'pad=0 strand=+ repeatMasking=none\_0

CATCCAGGCTTGTCCTGGTTGTTTCCTTGCTGTTATACCAGCCTGGCAAGGACTCCTGAGCTGCT  
GCTAAGAGTGGTTTCCTTGCTGACTGTTACGCCATGGCTTCTTGTGTCAGAACCCTGTGCTCTT  
AATGCTGCAGAGCTGCAAATCTGTCACTGCCACCTCTGAGTAGATCACTATTAAGGGACCTGGT  
CAGCA

>hg19\_ct\_UserTrack\_3545\_7245 range=chr10:99167611-99168610 5'pad=0

3'pad=0 strand=+ repeatMasking=none\_2

TTGTTTTTTTCTGTTTTGAGACGGAGTTTCGCTCTTGTGCCCAGGCTGGAGTACGATGGTGCAA  
TCTCGGCTCACTGCAACCTCCACCTCCCGGGTTCAAGCGATTCTCCTGCCTCAGGCTTCCTGAGT  
AGTTGGGATTACAGGCATGTGCCACCAAGCCCGCCAATTTTGTATTTTTAGTAGAGACAGAGTT  
TCTCC

>hg19\_ct\_UserTrack\_3545\_12669 range=chr3:179421107-179421306

5'pad=0 3'pad=0 strand=+ repeatMasking=none\_0

ACTGTTAAATAGCAAAAATTATTGAGCTCAAACCATCTAACCAGGTGATTCTTCCTTCATCTTCT  
GAGTGTTTTAGCACAGAAGAATTCATTTTCAGAGAGTGACTCTATAGTTCTACCAGAAAAGTTA  
AAGCACCTCTGGGTGATGCTGGGTTACAGAGACATAGCACTGTGAGCTCGGCAGGGGTCTTAGA  
GCTTG

>hg19\_ct\_UserTrack\_3545\_5404 range=chr11:68037625-68038224 5'pad=0  
3'pad=0 strand=+ repeatMasking=none\_0  
GAGAAATTAAGTTTGTATTAAGTTGGAGACCAGGGCAGATGGAAAGACGGAAGGTTAGGCTGGCAC  
TGGGAGCTCCCTTCTTCAGGGGTCAGCTCCCCATAGGATCTGCAAGGAAGGTGCAACAGGATACT  
CCCTTGAGCCATGTGACACTCCATGACAAAGGCACCCCCAACTATGCCCTGGGTGTCAACCTCC  
CTATC

>hg19\_ct\_UserTrack\_3545\_6136 range=chr12:81601870-81604269 5'pad=0  
3'pad=0 strand=+ repeatMasking=none\_4  
CCTCAACACTCCCTTTTCCCCAGAAGAAATACCTTTTAGTGAATAGAATATATTCGATAAAATACT  
TATTGAATGACTGTCCTTTGAATATCATTCTTGGAAATAAGAAAATGTTGTAAAGGAATCATAATG  
GTAACATATAGCTTTTATCTTCTGGAGTCTCTATTTTTTCTCTCTGGTTCATTTTGGGATTA  
CATTC

>hg19\_ct\_UserTrack\_3545\_9048 range=chr7:122581965-122582564 5'pad=0  
3'pad=0 strand=+ repeatMasking=none\_0  
TTTTATCATACTGCTTGTTTTTAAGCCATTATCACTTAGTTTCAAACACACTCTTGATTTTTTC  
CTTGCTTAGTAGGTCTGGGGCTCCGCAAACACTACATTTCCACTTTTTTCAGCTGCCTTCCTGTTAG  
GCTCCACATAGTGAATTCTGAAGGAAGACTGGAGTCTGGAGGAAGAAAAAATGACATATTCT  
CCTGT

>hg19\_ct\_UserTrack\_3545\_1030 range=chr6:10594615-10595814 5'pad=0  
3'pad=0 strand=+ repeatMasking=none\_0  
GACTTCATGAAAGTGGTATGCAAATAACTGATATTTGGGATGTACTCATATTAAGGATATATTAT  
GGGCTCTGGAGTGAGACAAATGCAATATTGAATTTTAGCTTTATCTCCGTTAGTTTGATGACCTT  
GTGTACTCTGACCTAAACTCTTCATTTTGTAGTCACAATAATGATGGCTACTTAGTAAGGCTGT  
TTTGA

>hg19\_ct\_UserTrack\_3545\_2146 range=chr21:47373973-47374172 5'pad=0  
3'pad=0 strand=+ repeatMasking=none\_0  
AGGATTAACAAGTTTTACTGGGGTCTGAAGAACTCCCCAGACCTCCACAAACAAGCTTCCTTG  
GAACTAAAGGAGCTCCCTCAACCTCCGTGATTTAGCAGAGGGCAAGATAAGGGTGATCACCCCA  
GCACCTGGACCCAGTTAGATTGAGTAAATCCACTGAGGCTCCAGAGGAAGGTCTTCAGGACTCAG  
GCCTT

>hg19\_ct\_UserTrack\_3545\_6017 range=chr5:109173902-109174701 5'pad=0  
3'pad=0 strand=+ repeatMasking=none\_1  
TTCATGCCCAGGTGGAGCCACTTTAGTAAAAAATAGCATTTTTGCTGCCATGTGATGCACAGG  
TAAAAACAGACCACTGGATACTGCTGGTTTGCATTCTGCTTCCTGGGAAGTTCTCCCTTCATTT  
CATGAGCCTCTTTGGGAAAGGTACAAACTTAGGGAATTACTGACACAGAATAGGAACAATTGGCA  
ATCCT

>hg19\_ct\_UserTrack\_3545\_7241 range=chr9:124708580-124710379 5'pad=0  
3'pad=0 strand=+ repeatMasking=none\_3  
CCCCATTCATTAGATCACCTGCTTGGCCCTGACAGCACTTGGGACCCCTGACCTCTGCCGCCTTC  
TCTGGTCTCACTATCCCTCATGGTGTGGTCATGTTTAGCTCAATTTATACATAGAACTCAGAT

TAAAGATCCTGTTCCAGGTAGCCCAGCTCTCAAGCAGAAAAATGGGGACTAAAACCAGGTATGTC  
CAGGT

>hg19\_ct\_UserTrack\_3545\_3021 range=chr13:55147000-55147399 5'pad=0  
3'pad=0 strand=+ repeatMasking=none\_1  
ACAAACAGAAAGGACATCCACACCAAAAACCCATCTGTACATCACCATCATCAAGGATAAGTGGT  
CTACCCAATAACAAGCAATAATATGCCAGATACAGTGGCTCATGCCTGTAATCCCAGCACTTTGG  
GAGGCCAAGAGGGGCAGATCACTTGAGGTCAGGAGTTCGAGACCAAACCTGACCAACATGGTGAAA  
CCCCA

>hg19\_ct\_UserTrack\_3545\_2621 range=chr10:33269995-33270194 5'pad=0  
3'pad=0 strand=+ repeatMasking=none\_0  
GAGTAGATAAAATGTGTTATGCCAGTGCCTGGGAATCCGATACAGCTGGCCCAGGAGGGGCCTG  
GGGTTCTGCTTTGTTTTGTCTTCAGATAGTGTCTAGCTCTTGTTCAGGCTGGAGTGCAGTGGCG  
AGCCTAGCTCACTGCAGCCTCTACCTCCCCGGCTCTAGTGATCTTCCTGCCTCAGCCTCCCGATT  
AGCTG

>hg19\_ct\_UserTrack\_3545\_6150 range=chr6:66276880-66277679 5'pad=0  
3'pad=0 strand=+ repeatMasking=none\_3  
GGATTATTTAGGTTTCTAGGAAATGTATCATTATTTTATTTTTCATATTTGCTATTAATGAAAGC  
CTTACACTTGGTGAAGTTATATGTTAACCTCTAGTTTTTCAGACCAATTAATAATAAATTTGGTAG  
TAAAAAAGATAAACCTAGCGGATTTATAGTTATGCAGGGTTTTAACAGTTTCTTTTCTAAGCT  
AGTTA

>hg19\_ct\_UserTrack\_3545\_1282 range=chr10:14922595-14922994 5'pad=0  
3'pad=0 strand=+ repeatMasking=none\_1  
TAAAAGTTTGGCTTTAAAAACAGTACAGTCCATAAGTATTACAAAATATCGATATACTCCATTTT  
TTTAATAACTGGAGTTTATTCACCTTGGTGATAATATATTGCAGTATGGGTAGAATAATAAGTGG  
AATTAAGCTTCATGCAACATATCAAAGAGAAAACCTAACATATAATGAGTTTGTAAACCGTAGAAA  
TATAT

>hg19\_ct\_UserTrack\_3545\_2483 range=chr7:28520676-28521475 5'pad=0  
3'pad=0 strand=+ repeatMasking=none\_1  
ACGCAATCCCAAAGGGGGCTGTGATTCAGGTTGTAGGATTCTGAGCTTTTGGGATACCAGGGGAT  
GGCAAATATCTTTGAAGAACAGGGATATTCTTCTGGTTTGAACAGAATAGTAATATTTAACCGCA  
GTGTTATGTGTCAAGTTCAGGCCTTCTGGGGGAGACTACTGGCTCTAAACTGCCAGGAACACAC  
CCTCT

>hg19\_ct\_UserTrack\_3545\_5595 range=chr9:103116780-103118179 5'pad=0  
3'pad=0 strand=+ repeatMasking=none\_4  
TTAATGGGTGCAGCACACCAGCATGGCACATGTATACATATGTAACCTAACCTGCACATTGTGCAC  
ATGTACCCTAAAACCTAAAGTATAATAATAATAAAAATAAAAAAGAACATATCGCCTTCTAATATA  
CCATGTAATTTACTTATTTATCATAATGATTATTTGATTCTGTCTTCATCCACCCTAATATGT  
AAGTT

>hg19\_ct\_UserTrack\_3545\_2904 range=chr22:39864855-39865854 5'pad=0  
3'pad=0 strand=+ repeatMasking=none\_0  
CAGCTCAGCCGAATCCTCCAGGAACAGGCACGGAGATTGAAGGGTGAGATTACACAGAACTTCT  
GTGCCCTCCTTGAGGGACTTGGACTTTCTCCTGAGGGCAGCGGTTCCAAGCTGGGAGGGGCAGCAT  
CAGATGTGGCTTTCGCTTGGCTCATGGGGGCCGGGTTGGGGGCCATTGAGGAAGCTGCTGCCAT  
TCCGG

```
>hg19_ct_UserTrack_3545_9202      range=chr10:123874411-123874810
5'pad=0 3'pad=0 strand=+ repeatMasking=none_0
GAAACGTGCTTGAACATTTAAAAATATTTTAGCAAGAAGGAAAGTTAAAGATCAAGGTTTCGTTTT
ACAGATACGAAAAGAGAGACTCAAAGAAGTCCAGGGTCTTGGCCAGGGCCACACATCAAGGTAGG
ACTCCAACCCAGACCCGACACTTGGCCTGGTGTCTCTGCGCCAAGTCTGCGGCCTCGTTG
GTTTT

>hg19_ct_UserTrack_3545_9648      range=chr11:120971191-120971590
5'pad=0 3'pad=0 strand=+ repeatMasking=none_0
AGTTTTGCTCATTCCACATCTACTGGATGCTTGAAGCATCTAACCGAGCACGTTTTCTCTTAT
TCACATGCCTTTTAACTATTTACTTACTGCAAATTTTTTATCAGAAGGGGTTTATCTCCCCCT
CTGCCTCCAGTGACCCTCACTGGGTGTTAGGGAAGGTTTCCAGGCCACAGTTTGAGATTTCCCTT
GTGGA

>hg19_ct_UserTrack_3545_5052     range=chr19:51910989-51911588 5'pad=0
3'pad=0 strand=+ repeatMasking=none_0
CCTTGCAGCATCCTTCCCCTCTAAGCTTAAAGGAGACTGTGTAACCAGCAGTGCTCACCCATCC
TGGGCCTGAGTTTGAATCCCAGCTCTGGAGTTCAGCTGTGTGACATGCAAGACCTTGTCCTCTC
TGAAGTCTTCTGTAAAATGAGGTGGCTGCATTGGGTGATCCCATTCACACCATGAGTCTATAG
TCCTA

>hg19_ct_UserTrack_3545_695     range=chr22:24190001-24191000 5'pad=0
3'pad=0 strand=+ repeatMasking=none_2
CACCCCTTCCAAGAGGCCCTGCTTAGAGGCCCTCCGCCCAAGGAATGCAGGCATCAGTGCT
TCAGACTCTGGCCTAACCCACCGTCCCACCTCCCAGGCCCCACCCCTTCCCTCCAGATGTGGGC
ACAGCTGTATTTTTAGAACAGCCGACCACGAGGACATTCTTTCCTTCTAATTAAGATGGCTTCAA
ATCTC

>hg19_ct_UserTrack_3545_10029    range=chr7:133635861-133636060
5'pad=0 3'pad=0 strand=+ repeatMasking=none_0
CAGCTCCCATTCTGCAAAACAAATGAGGAGGGGTGCTTTTCTTGAATGCTGTGCCTGGACTTTC
TCTCCCTTGACCCAGCCCTACCCATGGAATACCAAGGCAACCTCAACATCTGTTACACTCCTGCC
TTAATTCTATTCTCAGCACCAGCATAACTCAATAGAGGAGTATGGGCTTGTCCCTTGACAAGGT
ACTTG

>hg19_ct_UserTrack_3545_8904     range=chr8:132997819-132998218 5'pad=0
3'pad=0 strand=+ repeatMasking=none_1
CAGTTCATTGGAGGAGCCAGTCCACACAAGTGCCTGGAGACCTTGTACACAGGCTGCAAAAGGTA
ATGCAGCAGGTGGAGGATGGTGATTTGTAAAGCGATTTCCAAAATAGTGCATTTGAGAAAATAGA
TATTCTTGCTTTATTATAATAGGCTTAATCAAATGTAATGTGTCATCATTTTTTGTCTTATATAT
TATTT

>hg19_ct_UserTrack_3545_10628    range=chr5:168884623-168885222
5'pad=0 3'pad=0 strand=+ repeatMasking=none_1
GGGAACTAAGATATATTGGTAACAGAAGATGGTTGTGAACTCTACTGAAGTGGGGTAGAGGGAAA
TAAGAGTTCTAATTTAATCACATTGGAAACCTTTCAGGTCAAGAAAAAAATATGCTTCCTATA
GCAAGCTATCAAACTTACATACTTTAAAATATAAGACCATTTATCTTTTCTCATGGGACTCAGA
GTTCC

>hg19_ct_UserTrack_3545_5887    range=chr14:100030048-100031247
5'pad=0 3'pad=0 strand=+ repeatMasking=none_2
```

CTCCATAGAGGCTGGACCTCACTCCCATTAGCCATGGAAGAGAGCACTGTCTCTCCACAGAAGTT  
TCTTGT TTTGTTGTTTGTCTGCGCAGTGAAGGGGACAGACAGGTGGAGACCTCTTCGCACCCAC  
TGCTGCGTCCCTTGCTGCTCTCTGGTCCTGATAACCAAGAAGCACCAGGGTCTTGCACTCTCCTCC  
TTGCA  
>hg19\_ct\_UserTrack\_3545\_8816 range=chr7:121096565-121097564 5'pad=0  
3'pad=0 strand=+ repeatMasking=none\_3  
GAGCTAGTGCATTCCCTTGTCTGCCCTAGCTGGTGTGTCTCTAGGTTGCATTACCTCAAGTTG  
ACTGGCTCCTATCCAGCACAGCACTAGGACTTGCCAGAAATTGTGGTTCTTGTGGCCTAGACT  
GCCTTCCAAATTTATTTAGGACCCAGAGTACTTTAGCCTGCAGTGATGGGGCTAGCCAGAACTC  
AGGTT  
>hg19\_ct\_UserTrack\_3545\_6900 range=chr6:83779082-83779881 5'pad=0  
3'pad=0 strand=+ repeatMasking=none\_2  
GTGGAGTGTAGTTATTGATTTTATTCAAAATGGCATT TTTGAGGTTCCAACAAGTGAAGACTTGTT  
GATAATGGCATCACTTTTGTGTGATGATTTCTCCTTATAGTCATGCATTCTAAAATGAAATTA  
TGGTAGAAGCCACCCAAAATGTGCTTACTGTGTAATAACTACCTATTTTAAGAGCTTATATCATG  
GAAAA  
>hg19\_ct\_UserTrack\_3545\_232 range=chr11:1330825-1331024 5'pad=0  
3'pad=0 strand=+ repeatMasking=none\_0  
CCTCGAGGCCGCGCCGCCACAGTCAGCTGACAGCCGCGCCCGCCCCGGCACC GCCCCAC  
TGCGCAGGCGCCGCGCCAGGCACCGCCCTTCCGGCTCTCGCGCGCACGCGCGCTCCAGGGTAGG  
GCAGGCGCAGCCTCTCGCCCGCGCCTGCGCACCTGCTCTCTCCTCGAGCCCTGCAGCCCGGCGA  
AATGG  
>hg19\_ct\_UserTrack\_3545\_6082 range=chr10:84519421-84520020 5'pad=0  
3'pad=0 strand=+ repeatMasking=none\_1  
AGAAACAGCGGAAGGAAGGATGGTAGGTAACAGTCGGCACACAAGACACACAAGAGGAAACTCTAT  
GGGTCTGCATGCGTGAGTTGCTGAAAATGAGCTTTAAGGTTAAAGCCAGGAGTTTGAATTAAT  
GTGTAGCATGTGAAATATAAAAAACTCCATTCAATGCCCTCAATTTTATCAGAGGATTAGGGTAA  
CCTCC  
>hg19\_ct\_UserTrack\_3545\_2631 range=chr12:29224734-29225333 5'pad=0  
3'pad=0 strand=+ repeatMasking=none\_1  
GTAACTAACCACCATTAATCACCCAAAGCATAGATCAAATGCAAACCCATTATAGAAAAAGAG  
AATGAGGAACAGTGTGTGTCCTTTTGGTCAGGAGTGTGCTAACACAGGAATAGATAGGATCCTAA  
AATGCAACAATCAATGGCAAGTGGTCTTTTAAATTTAGTGGGCAACCAGAGGTGACATGATTTGA  
TGCCT  
>hg19\_ct\_UserTrack\_3545\_2008 range=chr8:23313456-23314255 5'pad=0  
3'pad=0 strand=+ repeatMasking=none\_3  
CATTTCTTATTAGAGGTAGAAGAATATAAGCCATAGATTCAACATGCAACAACCTACAAGACCTCT  
GTAAAGTAAACAGAGAAATAAACGATTCAACTACCGAATTAGTGTTCATTTTATAATTCTAC  
TATGTCAAACAGAATTAACAAACCTGATACAAAACATCAAATATATGGTAACACAAATAATATA  
ACTCT  
>hg19\_ct\_UserTrack\_3545\_3152 range=chr19:35631561-35632360 5'pad=0  
3'pad=0 strand=+ repeatMasking=none\_0  
TGGGGGAGAGCCTGGCTTTGCTGGTCCTTTGATTCCCCCTCGCCCTCCCCCAGAGTCCCAGTATT  
GATATCTCTGTCATTCTCCTTCCCTCTATTTTGTCTTCTCTGATTCCACCTGTCTGCATCT

TTTCTGTCTGTGTCTATCTGTGTCACTGTCTATGTGATACCTCTCTGGTTCTCTTTCTCTTGCC  
TGCGT  
>hg19\_ct\_UserTrack\_3545\_1589 range=chr22:30000801-30001000 5'pad=0  
3'pad=0 strand=+ repeatMasking=none\_0  
CAGGACCACATAGTAAATATTTTCAACTTTGTAGACTAGAGAATCTCTGTTGGAGTTATTCAACT  
CTTCAACTCTACCATTGTAACACAAAAGCAGCCTTAGATAAGATCAGCTTCCAGCATGACAGCTT  
AAGGAACCCATTCTCTGTAAAACGGTGAAAATTTCTTTTTTGTGTTTTCGTTTTGAGACAGA  
ATCTC  
>hg19\_ct\_UserTrack\_3545\_3843 range=chr19:42381761-42382760 5'pad=0  
3'pad=0 strand=+ repeatMasking=none\_0  
CAGGGCTGGGGCAGGAAGGGGACTTAGGGGTAGCAGCATTCAGCGTCTGTCAAGGGGAGAAAA  
GCTTTCTCTGCCTTAAACCTCAGGTGCCTCTCTCTGTTGGGAGTCCCTTCTCAGCACTGGGGAA  
TGGGTGTCTCATGGACTCCCCCTCACCTGCTCAAGGACAGCTGGCAGGGGCTGTGGCCACGCTAA  
CCCAG  
>hg19\_ct\_UserTrack\_3545\_12977 range=chr2:189327556-189327755  
5'pad=0 3'pad=0 strand=+ repeatMasking=none\_0  
AACCCATCATTTTTAAGCTGATAACAACCTTAACATCATTTTCATAAACAAACAACAAGGAATTAA  
AACTTATAAAGACTTGATGCCATAACTTCATACCCGTTTTCTTTTAACTTTTTTGTACTACTTA  
TATCTTATTGTTCCATTTTTCTTGAAAAGTTGTTTTAGTTATTATTTTTGATTGGATCATTGTTT  
AGTTT  
>hg19\_ct\_UserTrack\_3545\_12625 range=chr2:183364756-183366155  
5'pad=0 3'pad=0 strand=+ repeatMasking=none\_5  
ATCATCAGAAAAAGGAACAATTAATTGCTTGCTGAGCATGTGCAAATTTACAAAACAATTTGGCT  
TTTCAGATGGAATTTGAAGGCCTGAATTATTTAAGTCAACTGAACTACTACTACTGTGAATAGA  
GGCACAACGACCCTTATATAGTGACATAATCATCACATCCTTCTGGTTAATAACATATTTACAG  
CAGTC  
>hg19\_ct\_UserTrack\_3545\_1738 range=chr10:21583995-21586194 5'pad=0  
3'pad=0 strand=+ repeatMasking=none\_9  
GCCTGGAGTGCAGTGGGAGATCTCCGCTCACTGCAACCTCCGCCTCCAGCTTCAAGTGATTCT  
CCTGCCTCAGCCTCCAGAGTAGCTGAAATTACAGGCGCTGCCACCACACCTGGCTAATTCTTGT  
ATTTTTAGTAGAGACAGGGTTTACCATGTTGGCCAGGCTGGTCTTGAACCTCCTGGCCTCCAGTA  
AGTAA  
>hg19\_ct\_UserTrack\_3545\_7734 range=chr9:128453580-128454179 5'pad=0  
3'pad=0 strand=+ repeatMasking=none\_1  
TGAGAGCCCAGGAGAAAGGTCTGAGCAAACCTGGGAGACATCAACATGTAAGTGACAGGTAAATC  
CATAGATGTGAATTTTGCCAGGGAGAATATGTAAGAAGAACAGTAACCTAGGGATAAAACCAAG  
GAACAGCAATAGTTAAAGGGTAGCCTGAAGGAAAAACAAAAACAGAAGCTGGAAAAAAAAAAG  
TCAAT  
>hg19\_ct\_UserTrack\_3545\_1143 range=chr12:8716934-8717733 5'pad=0  
3'pad=0 strand=+ repeatMasking=none\_2  
GGAAGGGGCTCCCCCTGCCCCGAGGTGCCGCCCGAGGAGGTGGAGGAGGAGGAGCCGGGCACT  
GACTGGGGACCCAGGTGAGTCTAGCAAATGACAAGGCCCAACGGTCAAACCCGCTCAGTAATGC  
GCTCGTCCAAAGCACGCACTTAACGCTCAATCCTGGTGTGCGGTCCCGTTGCCAGGCAACGAAAG  
CAAGC

>hg19\_ct\_UserTrack\_3545\_764 range=chr7:6297476-6298275 5'pad=0  
3'pad=0 strand=+ repeatMasking=none\_0  
TGTGGAGGTAGGGAGGTTCTGGGTGGGTGAAATTCAGCAACAGCACCATCTAGAATCCCGCTGG  
TCATCCTCAGGGTGTGGGCTTGAAAATGGACAGGCTTAATTAAGAGCCATTGTGAATGCAAGCTG  
GCTACTCATCCAGGTCCAACAAAGTCTAGCATAAGAAATGCAACAGGGCTGGGCACGGTGGCTCA  
CTCCT

>hg19\_ct\_UserTrack\_3545\_6687 range=chr9:119065780-119066779 5'pad=0  
3'pad=0 strand=+ repeatMasking=none\_2  
TTATTTCTTCATTCACCTTTTTGTTTATGTTTACATCACTAAAGCCTTTATTCATTTGCATTTATT  
TTTGAATGCCCTCAGGAGAGTGAAAACAAATGGTAACATGGCATTTCCTGATGCTTAACAATGTA  
TAGTGCCAGCCTGCTGAATGAATGAATGAATGAATGAGTGCACAGATAGATGAATGGCTAGGGTT  
CATCC

>hg19\_ct\_UserTrack\_3545\_7969 range=chr12:110072818-110073417  
5'pad=0 3'pad=0 strand=+ repeatMasking=none\_0  
CCACCACCACCATCACCACCACCACCACCATCACCATCACCACCACCACCACCACCACCACCATCACC  
ACCACCATCATCATCATCATCACCACCACCATCACCACCATCACCACCACCACCACCACCAT  
CGCCATCATGATCACCACCACAATCATCACCACCCTGTCACCACCACCACCGTCCACCACCATTA  
CCACC

>hg19\_ct\_UserTrack\_3545\_1396 range=chr4:16078903-16079902 5'pad=0  
3'pad=0 strand=+ repeatMasking=none\_3  
AAACATCCCCCTCTCCACCTCACCCCGAATCCAAAGTAGAAGGGCATGGCCTCAAGTCTAGGGAC  
CACACCGTTTGAGGCTGGACACATGTGCAACACTGGAACCTGTCTTTCTAATAAGCTTACCAAGT  
AATCCTGATGGAAATCTTACCCTAAGTCACCACCTCTACAACCTAGGGGTCTCAGAGATGAAAGC  
CAGGG

>hg19\_ct\_UserTrack\_3545\_3715 range=chr16:49782100-49783499 5'pad=0  
3'pad=0 strand=+ repeatMasking=none\_2  
TAGCTGGTTGCTAAGAAATCACACCGGGTGACATCACCTGATCACTTACTACAGGCAAGACATGG  
CCAGGGTCAGAGTTCAAAACAGTTTCTGGAATCTTTCCAGCGAAGCCCCTTTTCCGTGCAGGGA  
TGGGAGGATGGGAAAGTATCTTGATGGGTACCCACCTGTGACCCCTGCCCTATGACAGAGGTAC  
TATTA

>hg19\_ct\_UserTrack\_3545\_11269 range=chr5:175065595-175067994  
5'pad=0 3'pad=0 strand=+ repeatMasking=none\_5  
TCCTCTGGGGGTCCCCAACAAGGGGCAGGGAGCAGTGCAGGGGAGTGCCTCAGACCTCAGACCCC  
AGGCTACGCGACCTGGATCCAGGTCCCAGCTCTGCCTCTCGGTAGCAGGGCAACTTGGGCAAGTT  
GTTAACCTCTCTGGGCCTCAGTTTCCCTGTGAGCAAAGTAAAGATGCTGCTAGTAATCACACCTA  
TCTCA

>hg19\_ct\_UserTrack\_3545\_968 range=chr4:8281901-8282100 5'pad=0  
3'pad=0 strand=+ repeatMasking=none\_0  
GGAGAGGTAATATGGTCCCACCTGGGGGCTGTGCCCGTGCCCTGGCGCTTCTCCTCAGGCGAGGC  
ACATGGGGCGCCAGCCTCAGGCCCCAGGGCACACAGGGGAGCAGCAGACCGGCTGAGTCCCTCCCT  
CCTGGAGGGAGGAGGGCCTGGGCCCTGGGGGTTGCCCTGGGATCCCTCTGGGTCTGGAAATTGTG  
GGTCT

>hg19\_ct\_UserTrack\_3545\_4850 range=chr7:64735166-64736365 5'pad=0  
3'pad=0 strand=+ repeatMasking=none\_2

TGTTTCATATATGGTTGTTTATTAAACTATTTATCATGAAAGTATGTAAGTGGCATGCTTAATGTC  
TGAAAGAGATAGAGACTTCAGCTTTTCCTGTTGAGGTATAAAAATTTAAGTGCCTTACTATTTTCCT  
TACAAATATTCTATAAACACTGTGTTTGAGTGATTTTGCTGTTTTCTTTAAACACTGGGCATTAGT  
TTTAA

>hg19\_ct\_UserTrack\_3545\_1633 range=chr5:29524844-29525043 5'pad=0  
3'pad=0 strand=+ repeatMasking=none\_0  
AGGTTGGTCATTCATTTTATTTTCAGCAAATGAGTAGTAAGTAGGTCGAGGTAGTAAAAAGAAATA  
CCTCATTTTGTAGTAAAGAGTGTCTTAAGCAATTGCAATATAAACTCACATTACAAAGACAATGG  
AAGTTTGACCTACCAGTTTTTGGAGTGTGAGAACTGTGCAAACAGAGCATAACAAGACAGAGTTTA  
CACTA

>hg19\_ct\_UserTrack\_3545\_2583 range=chr22:38367855-38368654 5'pad=0  
3'pad=0 strand=+ repeatMasking=none\_2  
TGAGGAAGCACCAGTACAGGGATAAGAGATGAAGAGACAGGCCAGGTCAGGCTCACCAAGCAGGT  
AACCGGAACCTTTAATTTTATTATGTGGAATGCTTAATGCAGAGTTAATAGGGGCTAGAGTGGCT  
AGGAGAGGGGACTACTGAGATAAATAACAGGAGACAGTAATGAGTTACATGTGGATTTGGGGGC  
TGACAG

>hg19\_ct\_UserTrack\_3545\_14460 range=chr2:210443956-210444555  
5'pad=0 3'pad=0 strand=+ repeatMasking=none\_1  
CTAAATCGTAAGTGAGGGCTGCATCCTATTGTCAGTGAATGATGGCGGAGCTGAGTGGCTTGTC  
TCATTCTCGAAAATTCTGAGACTAGTGAGCTCTCTCCCTCTCTCCCACTCGCCTTATTTTCCTGT  
TCGCCACTGCGGGGACTTCTAATTTGCAGCTTCCCTTTCCCGGCACACACAGACACGAGCTGGT  
GGCTT

>hg19\_ct\_UserTrack\_3545\_4451 range=chr17:42174275-42175474 5'pad=0  
3'pad=0 strand=+ repeatMasking=none\_2  
GGCATGGTTGGGAACATTCTCTGTGGTTTTTCCCGCCAGCCATACTGACGACTCTGTGGCCACAA  
GGCCAGAGCCACATGTGCAGAAAGTGGCCAGATGTGGCCAGAGGGTGGGGTTACACATACTCATCT  
TCATTCCCAACCCATGTCCTGCCCCAGCACAGGAGAAAGGTCCTTGAAACTGCAGAAGGCCT  
TCCTG

>hg19\_ct\_UserTrack\_3545\_11356 range=chr3:155243307-155244906  
5'pad=0 3'pad=0 strand=+ repeatMasking=none\_3  
AAACCAGGCTCTGAGGCTAAGAGGCCAAGGCGACTGCAGTAGGCAGCCTCTAAATAATAGTACCA  
ATGTCTCCTGTCTCAGTATTCACACCCTTCTGCAATCCCCTCCCTTTGAGCGTGGCCTGGACCTA  
GTGCCCGACATCTAATGAACTGAGTACAGCAAAGTGATGGGAGGTTACTTATCAGATCAGGTTA  
TAGAA

>hg19\_ct\_UserTrack\_3545\_7141 range=chr3:98442511-98442710 5'pad=0  
3'pad=0 strand=+ repeatMasking=none\_0  
TCCATCTCAAGAAGGTAACAGAGCTTTGGTGTCTGTTGGCTCAGTGATTTTTTGGTTACAGAAT  
AAAAACTAAAAGTACCAGATATCCAGAAGACAACCTCAACTTGTGTTTCTTTTGTGTTAGAAATCT  
TAGACTGATTGAGTCAGAGAAGCAGGAGTCCACTGTTGTGCTTCATGTTAGGGGAATGAGCGTGG  
CGAGG

>hg19\_ct\_UserTrack\_3545\_1613 range=chr16:13262700-13263099 5'pad=0  
3'pad=0 strand=+ repeatMasking=none\_1  
TTGCTTTTGGATTTCCAACCTCTCTGTATACAATGACCCCTACGGAAGACCTCACACCTGTTTCAG  
AGAAGAGAATAATACCCGCCCTGGGTTTTGGCCATTTCCCTTGTCTTACAGTTGTCATGGGATCT

TCACCCCTCCCAGCTCCATTGGAAGGTCAGTTGCAGTGCAGCCCTTTTCCGGGGTAATAAGTTTT  
TAATG

>hg19\_ct\_UserTrack\_3545\_6105 range=chr14:101123848-101125247  
5'pad=0 3'pad=0 strand=+ repeatMasking=none\_5  
AGCAGAGGCTGCAGCCAGGAGGGCAAAGGGGAGGTGGCTAGGCCATGGAGGGGAGGAGGCATG  
GGGAGAGCAGCATTGGGGGAGCTCCAGAAGGCCCTGGTGTGACAACAGAGGGCAGACCTGCTCC  
TCCTCCTCCCTCCCTCTCTGCAGCTGCAGCCGGAAGGGCCTTGTCCCTGGGAGGGCTGCCTTGAC  
TCCTC

>hg19\_ct\_UserTrack\_3545\_379 range=chr22:20244001-20244600 5'pad=0  
3'pad=0 strand=+ repeatMasking=none\_1  
GCCTGCAGGAAGCCATGCCCCGTCCCGCTCACTCCTCCACTGGCTGCTTCTCCGACCCCGATCAT  
GGCTGCAGCAGGCCTGGAGGCCCGGTCACCCCAGGCCAGTCACATGGCCCTACTCAGGCACCA  
CCTGTGCTTCTTGGCTGGGTTTCTCATCTGAGAAATGGGAAGGCTGGGTCTGGGTGAGGCACTTC  
TGTGG

>hg19\_ct\_UserTrack\_3545\_258 range=chr15:26373508-26374907 5'pad=0  
3'pad=0 strand=+ repeatMasking=none\_0  
AACTTCAAATCAATGAAGAGAACAGGAATGAAAAATAATCTACTTGATCTCTGGGAAGGTGTGT  
GGTTGATTAGAAATGATGACAATTTTTTGACCATTGGGACATGGCAGTCAAATCTGGGATGAAC  
TTAGAACTTGTGGTACCATAAATTGCCGTGGAAGTGAAGCTATGTGACTTACGAGGCTAGGTT  
TCTAA

>hg19\_ct\_UserTrack\_3545\_7846 range=chr7:104999165-104999564 5'pad=0  
3'pad=0 strand=+ repeatMasking=none\_1  
CTAAGAACACAGAGAGAGAGAGAGAGAAAGCAAGAGTGGAGGTGGAGGTGCCTCTTTTCAA  
CAACCAGTTCTCTGGAAACTAAGAGTGAGAAGCAAGAATGACACCTCAAGCCATTCAAGAGGGAT  
CCACCCCTACAATCCAAACACCAGGCCACCACCAACACTGGGGTATCAAATTTCAACATGAG  
GCTTG

>hg19\_ct\_UserTrack\_3545\_7989 range=chr1:68831813-68832012 5'pad=0  
3'pad=0 strand=+ repeatMasking=none\_0  
TCAAGATCTCATGAGTTGAGACACAGCCGCTCCCTAGGGGAGCACAGGACCTGGTTTCTGTGCC  
ATTCCCTGCCCCTCTTTAGGCTGACTTCTCTTTATTGAAGTCATAATGGGGTTAAAAATGACCAAT  
CTGTTCAACCTTGCAAGAGACAAGGAAAGGAGGAAGGAAAGAGAGCCTTTCACATTTGTGTGTG  
TGTGT

>hg19\_ct\_UserTrack\_3545\_6961 range=chr8:101693225-101693824 5'pad=0  
3'pad=0 strand=+ repeatMasking=none\_1  
ACTGCACAGGAACATTTAGTCCTAGTTTTGCATAAAGACCCACAATGCACTCATGCACTCTTTGG  
CATTCTTTAAATCTTGCCCCATTGTGACGTGGAGACATGGATCTTAAGAAGAAAAAATGGTCTTT  
GTTTCATCTTAGGTATTTCTTTTCAGTGGTACCTAGAGGCCATTGGCAAATATGTTCAAATTATAAA  
CCAAA

>hg19\_ct\_UserTrack\_3545\_16446 range=chr1:206079578-206080177  
5'pad=0 3'pad=0 strand=+ repeatMasking=none\_0  
TCCTTGACCCCTTCTCGGGCCCCACGCCTACCCGTATGACCACATCCTCACTATTTCTCCCTA  
AACACAAATCGAGGGACATACAAAGCAAGCACTGTACTTACTTCTTAGCCAATCCGTCCCTCCC  
CCATCCCCAACACACAGGGAGACTTTATGTTAGCCTTGTAATAAGAAACACCATTCACAGTTA  
TTTTT

```
>hg19_ct_UserTrack_3545_10361      range=chr5:166802623-166802822
5'pad=0 3'pad=0 strand=+ repeatMasking=none_0
GGAAGTAAACCAGCAACCCTCCAGCACACAAGAAATGAGAAGAGAATTTAAAAATCACATTCTGA
TGATAACACAGCATTTCAGGTGTAGTCAGTTGGTCTTATTAGCAAGTAAATTACATTGCAAAAGAG
GCGGCTTGATAAACTATGACCTATACCTAGAAAATGTCCCTCTCTCCACAAGTTTCTAGGTCTTTG
TATTG
>hg19_ct_UserTrack_3545_2881 range=chr15:61201309-61201508 5'pad=0
3'pad=0 strand=+ repeatMasking=none_0
TAGAGAAATGGTGGCAAAGGAATTCTTGCTGTGGTCCCAGCGGTGAGCATAACAGAGTTACCTCT
CTCCACCCCAAATATTCAGACTGCAAGGACACTGGCTCCCAAGCTTCGACCTGCTTGGAGTTCCA
TTCCAGGTACTCTGCTGATGTCTCGGCCAGCCTCAGCCACAGACTCCCAGCTGAGCTGAGCTGTT
CTGAG
>hg19_ct_UserTrack_3545_804  range=chr3:12468401-12469200 5'pad=0
3'pad=0 strand=+ repeatMasking=none_0
ACTCAGCTGGCAGTGTGCACCCCTTGCCACACATTAGAATCACCCAAGAGCTATTTAAAAATCCTG
AAGGTCATACCCAGGCAAGTGAATCAGAATCTCTAGGGATGGGTCCCAGGCATTTCGTTTGCTTT
TTTAGTCTCCCCAGATAATTTTAATATGTAGCCAAAATTGATAATCCCTGCACTAGACCAAGCTC
CGATT
>hg19_ct_UserTrack_3545_4134 range=chr11:58826025-58826624 5'pad=0
3'pad=0 strand=+ repeatMasking=none_1
CATTCCCACAAGATGCAAGTAAAGAAGCACCGCGGACACCGGGGGAGGGTCACAGAGTGACAGGA
GGACTGGTTGACCAGCTGACTGGCCTCACTTCTGACAAATGCAAATTACCCAGCCACAGTCCAAC
CAAGGGTATCAAAACAGGATCTCTGCAGATGGAGCTCAGTGTTATGTGTTTTGGATGCTCGCAAT
AAGAT
>hg19_ct_UserTrack_3545_15835      range=chr2:232233357-232233756
5'pad=0 3'pad=0 strand=+ repeatMasking=none_0
ACAGGGTCACACTTTGTTGCCCAAGCTGGAGGGCCCTGGCGTGAACAAAGCTCACTGCAGCCTTG
ACCTCCCAGGCACAAGTGATCTTCTGCCTAGCCTCCCAAGTAGCTGGGATTACAGGCACATACC
ACCATGCCCGCTAATTTTTTTGTATTTTTAGTAGAGATGGGTTTTTACCATGCCGGCCAGGCTGG
TCGCG
>hg19_ct_UserTrack_3545_6801 range=chr9:120106380-120107579 5'pad=0
3'pad=0 strand=+ repeatMasking=none_0
GGAGGTGGGAAAGGAGATCTCTCCAGCACAGCATGCCTGAAAAACGATGCCAGAACTACACAGCC
TTCCACAAAAGCACGTGGAGAAAAAAAACCCATCCCCAAAAGCAGCATTAAACAGGAGAATATTA
AACCTCTACCATGGCACAGTGAATAAGACTTCAAAGCCCTCTACGTATGGAAATGAATCCTGCA
GGCAG
>hg19_ct_UserTrack_3545_1820 range=chr21:44846573-44847372 5'pad=0
3'pad=0 strand=+ repeatMasking=none_2
GCCGCCGCTGCTGCTGCCTCCGGGGCCGCGCCGCATGTCAGCCCGGAGCCGCCGCGCTCCGCCGC
ACGCGGCCGCCCGCCCCGCCCCGGCCCCGCCCCGCCCCGCCCCCGTCCCGCCCCCTGCCCC
GCCCGGCCGCCCGGGCGGGGCGCCCATTTGACGTGCTTTGACGCCAGAGCGACGCGCGGCCG
AGCGC
>hg19_ct_UserTrack_3545_2158  range=chrX:66783676-66783875 5'pad=0
3'pad=0 strand=+ repeatMasking=none_0
```

CAAGGAACAGAATGACTCAATGCAAATTATGGGACCTCTTTGAGTTTGGGGCCCCTACATTTAAA  
CTAGTAACTCCGTTGCACATATTGGCACCCCTTCCCCAACAAAATTACTGGGCAGGAATTTTCTT  
GAATCCTTCCGTGGCCTGGAATGATCTCCCTTCTCATCCTTGTGATCCACACAGCTGGCAAATGG  
CAGGC

>hg19\_ct\_UserTrack\_3545\_4904 range=chr8:68880447-68880646 5'pad=0  
3'pad=0 strand=+ repeatMasking=none\_0  
TGGAAGCATCTGCCAGCGACTGGGGAGGGGAAAGGTCACCTTGAGGACTGTGGAAAATATTCCCTT  
TCTCCTTAGCATCCTGGAACGTCGGCTCTTGACTAAATTGTTAATAGAATCTGGGAGCTCGGATT  
CTGGTGCTGACATTTTTTTTTCAGGGTTAGTTCTAGAAATGATATTTCTTAAGCAGCCTTTTGC  
GCTTC

>hg19\_ct\_UserTrack\_3545\_17094 range=chr1:214327578-214328577  
5'pad=0 3'pad=0 strand=+ repeatMasking=none\_1  
TGATGTTAGAAAGTCATTACCTATCCACAGGCGGGCATAGCCATCCAGAGAGAGATGAGCCCAGC  
AGAGACCCCAGCCCTGGGTTCATCTTAGTGGCTCTGGGTGCAAACAGAGCCACAGAATGGGAGCAA  
ACACTATAAACAAAGTCAAAGGCAAATACCTAAATCAGTACCCCCACCTCAACCTGCCAGACTTT  
CAACT

>hg19\_ct\_UserTrack\_3545\_6087 range=chr11:73250153-73251552 5'pad=0  
3'pad=0 strand=+ repeatMasking=none\_0  
CTATGCAACTTAGGTCCCTTCCCCTATCTGGGTCTTCATTTTCTCAATTCAACAGTTAAATGGTA  
CAACATTTAACTTAAAAAATCAATTGAATTAATGATCTCAAACACTCCAGGAATATAGGATACA  
CAATCAAGACTCTTTATTTTTATTTATTTATTTTTATTTTTATTTTTATTTTTGAGACGGAGTCTCAT  
TCTGT

>hg19\_ct\_UserTrack\_3545\_2515 range=chr8:29374882-29375281 5'pad=0  
3'pad=0 strand=+ repeatMasking=none\_0  
TCCTTTGCAAAAACCTCTCCCAGAAGAGTTACAAACCTCTGCAACTAAGTGAATTGGATATCTTGA  
TTAGACTTGTTCCTTTTTCTTTGACAGGGCAAATCCCTCTCTGAGGAAGAAGGGAGGAGCCTGC  
ATTGATTAACATATTGCCATTCCCTGAATGAATTTACATTCATGAATTATAATATTGGACCATTCC  
TCTGA

>hg19\_ct\_UserTrack\_3545\_438 range=chr22:21057401-21057800 5'pad=0  
3'pad=0 strand=+ repeatMasking=none\_0  
GACGCTGCAGGTGCTTGAGCGGGACCCTGAGGTCTTTAGTAGGGGCGGAGCAGCAGCGTGAGCGG  
GGCCGTGACCACCTGGGGGTGTGGCTTAAGGCAGGCCCTGAAGGCGTGGGCGGGGCGGGGATGTG  
GGCGGGGCATAATCGCCTGGGGGCGGGGCCCTGAGGGCTAGATACGGGCGGAGCGCGGAGGGGGC  
GGGC

>hg19\_ct\_UserTrack\_3545\_3792 range=chr5:72989645-72989844 5'pad=0  
3'pad=0 strand=+ repeatMasking=none\_0  
CCTTTTCTCTATCCTCTCTGAATGGCCTTGCTTTTATCTCTTTGCCTTGTCTCCTGTTTTCTTCT  
GAGGGGGCAAACAAATTCCAAAGCAGCAGTTCTAGCCATAGAGCAAAGAGAGGACCATGGTAACT  
GTTTTACCCAGCCTGGCCAGCAGCCACGAGATGTCAGTTCTGGGAAGTCTGAAGCTCCTTAGCT  
GCTGC

>hg19\_ct\_UserTrack\_3545\_13421 range=chr1:165628977-165629176  
5'pad=0 3'pad=0 strand=+ repeatMasking=none\_0  
TCTTCAAGGAGTGTGGCCCTGACAACTTCTTGGTTTTGGCCAAGTCAAACCATTTTGGGACTTCT  
GACTTCCAGAAGTGAAGATAATAAGTTTTGTGTTGTTTTAAGCTGCTAAGTTGGTGTAATTTGT

TACAGCAAGCATAGGAACTAATATACTGGGTTGAGTTCTAGGAAACAGAGAGGGTAGCAGAAAG  
CACAG  
>hg19\_ct\_UserTrack\_3545\_5006 range=chr14:91827848-91828447 5'pad=0  
3'pad=0 strand=+ repeatMasking=none\_2  
GAGCCTGTCCGTCACACAGCTCCCTCCCAGCCTCAAACTACTCCAGGCTGGGTGCAGAGGCT  
CACGCCTGCAATCCTAGCACTCTGGGAGGCCAAGGTGGGCGGATCACCTGAGGTGAGGGTTCAA  
GACCAGCCTGGCCAACATGGTGAAATCCTGTCTCTACTAAAAATACAAAATTAGCCAGGCCTGG  
TGACG  
>hg19\_ct\_UserTrack\_3545\_4014 range=chr12:52195934-52196133 5'pad=0  
3'pad=0 strand=+ repeatMasking=none\_0  
CTAGTTACAGGTCTAGAAACAAACAGGGGTGTTGGGGGTGGGTTCAGAAGAGAATCAGCATTGTC  
TTGCTTCAGGGGAGACCACTGTTGCCTCAAGCATTGCAGGGTTAATCTCAGACAAATGTGAAAG  
GCTGGTGGCAGCCTGGGTGGGGGAAGGGATATTGCCACCACTGGGGGTGAGGAGGCTGTTTTCTC  
TGGCA  
>hg19\_ct\_UserTrack\_3545\_1105 range=chr11:10714825-10715224 5'pad=0  
3'pad=0 strand=+ repeatMasking=none\_1  
GTTCCCTCCGCTTCCCAGCCGAAGAGGCAGGTTATTCTAGGATATAGGGGAGGCTTACCTAAAAC  
TGAGTTATTCTCCTTTCTCCTCTGGCCAGCCTCTCTTCACTCTGGGGAGCTTTTACCATTTAAG  
GTCAATGTTACATCTGGCTCCGGAGCTCAGAGCCGAGAAGCCTCTGGCTGCAGAACCTCGGCCGC  
ACGCC  
>hg19\_ct\_UserTrack\_3545\_6560 range=chr11:77851953-77852152 5'pad=0  
3'pad=0 strand=+ repeatMasking=none\_0  
ACCCATGTGAATATGATTACAGATTTCTAGCTCAGCACTCTTCTCTCACTTTTACAGACCCTGGTC  
TCCAGTTGGCTACCTGACCTCACGTAGATGTTTTTGTGTTTTGTTTTGAGAGACAGGGTCTCATTC  
TGTGGCCCAGGCTGGAGGGCAATAGTGCAAACACAGCTCACTGCAGCCTCGATCTCCTGGGCTCA  
AGCAG  
>hg19\_ct\_UserTrack\_3545\_3072 range=chr14:68809048-68810247 5'pad=0  
3'pad=0 strand=+ repeatMasking=none\_1  
TGTTGCTATGTACCCATGCCTTCTCTCTCTCTTTCTCTCTCTCTCCCTCTCTCTCTGTCTC  
TCTCTTTCTAATGAAGAGTTTAGCTTTGGAGTTAATGAGCAAAGATTTTCTTACCATAAAGTGA  
AGCCCATCAAGTGAAAGCAAGTAGAAAGGCGCAGAAAGGTTTATCCTTGTCACCATGTGGAAGGA  
CACTT  
>hg19\_ct\_UserTrack\_3545\_104 range=chr2:314201-314400 5'pad=0  
3'pad=0 strand=+ repeatMasking=none\_0  
CCGCAGGAAAGCGGTGAAGCGGGCAGGGCAGCTGGAGCACCTGTGTGGCATCATCAGCTCCAG  
CCTGAAGTTGGTCTTGTGGTGGTGTGTTTTCGTTGCTGCCTTCATCTGATAGCCCTGAAGAAAGTGG  
CGCCTCTGGGAGGCGAACGGGGAGGCCTCAGTGGCCAGGGGCTCGGCTTTGTGACCCATGCAGG  
AGATA  
>hg19\_ct\_UserTrack\_3545\_3772 range=chr18:51912403-51912802 5'pad=0  
3'pad=0 strand=+ repeatMasking=none\_0  
AGAGCTTTTTTACAGACATCATACACAACACATACAGCTACGCAGACAGGTAGGAGAAAAC  
CAATCCCCTGGTGGAGCCCTGTAAGAGAGCAGGCTAGGAAAACATACAGATATCAAACCAGAAAG  
GACTTATTCCTAAGGCAGGATTGCTAAACAAAGCCTTGCCGCACCCCAGGATGTAGAACAAGA  
TGGAG

```
>hg19_ct_UserTrack_3545_5330      range=chr13:107332600-107333199
5'pad=0 3'pad=0 strand=+ repeatMasking=none_1
GAATGAATGAGTTCCGCTCTAGCAAAAAGTGCCTGTGATCTGAAATAATTAGTCATCACAATCAG
AGAGAATGCTATGTGACTAGTAAATCATAACAATTGAGGAATTGCATTTAAAAATTAGAGTTATCA
GGAACACCTAAAAAGCTGTCTATTCAAGTAAGCCCCTGGAGCTTTGATAATTATCAGGAGGCAGA
ATGTA
>hg19_ct_UserTrack_3545_3927  range=chr2:47982497-47983496 5'pad=0
3'pad=0 strand=+ repeatMasking=none_4
AACTTGTGAGAATCAAAGAGCTGCAGTATTGTGGTGGGATTATAGGCAGGGAGGCTGATGTTCTG
CGGCAGGAGTAGGTAGCAAGGTAGATTGCTCCAAGGATCTTCACTTTGCTTTACCTGCTTCCAAC
CTGAAGAGCTTTCAGATTTTTTTTTTAACTTTTATTTTTTGTCTATTCATTTTTTTTTTTTTTTG
GACAC
>hg19_ct_UserTrack_3545_11710   range=chr2:170932155-170933754
5'pad=0 3'pad=0 strand=+ repeatMasking=none_0
CCCTTGTGTCCCTGCTCCACTCTTGTGTTCCTAACCCTGATCCTGACCCTAGGTCAACCAGATTC
TCTTCTCAGGAATGTTAAATCTGTATAGCGAGACTTAGCAGGGTAAATGGTGACAGGAGCTGTA
TAGCCAACAGTACTACCCTTGAAAACTGTCTGTGAATTACTACTTCTGAATTTTTTTTATCAGT
TAAGA
>hg19_ct_UserTrack_3545_1424   range=chr3:18384997-18385596 5'pad=0
3'pad=0 strand=+ repeatMasking=none_1
CTGAAGCTTTTAATTCTTTAATCCACCATGGAATGTTGCTTAATTACATATTTTATTATGCATAA
CTGAAAATTATGTACTTTAGTTTCAACAATGATATGAAAGCATGTATTGTTTATAAATAGAGACT
GGTTTGTCTCTTTTTTTTATATTACAAATATTTGTGGAATTCTCACATGTTCTCCTTCTAAACTT
GGCTT
>hg19_ct_UserTrack_3545_12013   range=chr3:169777107-169777706
5'pad=0 3'pad=0 strand=+ repeatMasking=none_2
GATGGGGAGGTTTGTTACACAGGAAACGGGTGCCATGGTGGTTTGTGCTGTACAGATTATCCCATC
ACCTAGGCATTAAGCCCAGCATCCATTAGCTGTTTTTCTGATGCTTTTCTTCCCCCCTCCCC
CCTCTAGCAGGCCCAAGTGTGTGGTGTTCACCATGTGTCCACGTGGGAACCAGATTCTTGCT
GTGGG
>hg19_ct_UserTrack_3545_1361   range=chr10:16401995-16402794 5'pad=0
3'pad=0 strand=+ repeatMasking=none_0
CTCCCACCCCAAGATAACATGACCCAAGCCAGTTAGAGCCACATTTATGTATGTACTTAAGAA
AGCAAAACAGATCAAATTACACATTTCAAACATTAGCTCTGTACACTATAATCTTATGTGGGGT
GATAATGATGACAATGGGAATCTGAGAATGGGGGAGGGGTTGAGAGAGGAGAAAAGAAGAACTG
GTCAG
>hg19_ct_UserTrack_3545_5147   range=chr11:66579425-66579824 5'pad=0
3'pad=0 strand=+ repeatMasking=none_0
TGGGGAGAGAGAGAAAACACTTTTTAAAATGTAAAAACAATTTCTAATCCAAAAATAGAAAAGA
GGAAAAAGGAAACAAAGAATACAAGCAAGAAATGGAAAAAGATGATGGATTTAAACTCCACTAT
AGCTATCTTCATATTACAAGTAAATGATTTAAACAACCCAATTATAAGACAACCTGCACATCTTGG
CTCCT
>hg19_ct_UserTrack_3545_324    range=chr14:23648161-23648960 5'pad=0
3'pad=0 strand=+ repeatMasking=none_3
```

GTAATCCCAGCACTGATAGGCCGAGGTGGGAGGATTTCTTGAGCCCAGGAGTTGGAGACCAGCCT  
GGGCGATACAGTGAGACCCTGTTTCTACAAGAAAAATTTAAAATAGCTAGGTGTCGTGGTGTAT  
GCCTGTGGTCACAGCTACTGAGGAAGCTGAGGTGGAAGGATCGCTTGAGCCCAGGAGTTTGAGGC  
TGAG

>hg19\_ct\_UserTrack\_3545\_181 range=chr3:3122201-3122600 5'pad=0  
3'pad=0 strand=+ repeatMasking=none\_0  
TCTCTGTGCTTCACTGTGGGAAGCCCTGTTCTATTGTTTGTATCCCCGTTTCTGATAAGGCTAAG  
TGTGCAGGCAGCTTCTCTAATTAAAGGTGGCTGCTTTGCAAACCTACCGTTTCTCCTGACATTCCC  
CAAACCTCTAGGTGGGACTGAAGCCCTTTATTAAAAACCTATGGCTATACTATTTATTTATTTATA  
TGAGA

>hg19\_ct\_UserTrack\_3545\_199 range=chr17:1393251-1393650 5'pad=0  
3'pad=0 strand=+ repeatMasking=none\_1  
GCTCTCCTGCCTCCACTCCTCACACCAAGTAGTCACGACCTGCTAAAACCTCACCTCCAGGCCGG  
GCGCGGTGGCTCAGGCCTGTAATCCCAGCACTTTGGTAGGCCTAGGCAGGTGGATCACAAGGTCA  
GGAGATTGAGACCATCCTGGCTAACACGGTGAAACCCCGTCTCTACTAAAAAAAAAAAAAAAAATTA  
GCTGG

>hg19\_ct\_UserTrack\_3545\_5022 range=chr9:97742380-97743179 5'pad=0  
3'pad=0 strand=+ repeatMasking=none\_0  
CTGTGGAAATCACCTGGCCTGGAGCTCCTCTCCCCGTCCACTCTCCTCTGGCCCTGTGCCTCCCA  
GAGACCATTGGACAGCCCAGGCCCTTCGCCAAATCAAATGCTGGCCATGGCAAGCCTAGGCCCT  
GGGAAGTCTGAGGGTGGGATCCAGATGCGCGGTGAGGACCCTGCAGGCTGGGAGCTCTCTCA  
GTCTG

>hg19\_ct\_UserTrack\_3545\_6986 range=chr12:97645870-97646069 5'pad=0  
3'pad=0 strand=+ repeatMasking=none\_0  
ATGATGGTGACAGGGTCTCTGCTGTCTATTCTCATTTTTATTGAGTTGACAGTGTGAAAAGATAATA  
AATCTTGAGACCCCCAAATCACTAAGCTAAAGGGAAAAGTCAAGCTGAGAACTGCTTAGGGCAA  
CTTCCATTCTATTAGTCATCGCTCTGCTCATTGAGATAAATGCATATGTGACTGCTTCCTTTGG  
AAAGG

>hg19\_ct\_UserTrack\_3545\_1526 range=chr20:20421201-20422000 5'pad=0  
3'pad=0 strand=+ repeatMasking=none\_0  
TACCTGCTCTGAATAGAAGCACTTTTGGCCCCCTTGTCAAAGACTAGGGAAGAAAGCCCGCCT  
CTGGTTGGCAGCAGTCTTGGATTCTCGCCCCGGCCATACTGTGCAATCACGCTGTTTATTCCAC  
TGTAACAATCAGACAGCGAGAGCAGACCTGGTACTCCCCGGCCCGGCCTTCCTTGGCAGCT  
GACGG

>hg19\_ct\_UserTrack\_3545\_16441 range=chr2:237568062-237569861  
5'pad=0 3'pad=0 strand=+ repeatMasking=none\_6  
GTGACCCTAATGTTTCAAGTCAAGCTACAAAGCTACCTTATTTTTGTTCTTACTGTCACTAAAGA  
TACATCTAAAATTATAAATAATTTTCATGACAGTAGGTAAAGTAGAATCAGTTATTTTGGGAGAC  
ATTATCAATATTCAGCTGCAATAAAAAATTAATGGGTAAAAGCAATTCTGATGTATAATAAAGAT  
TAACT

>hg19\_ct\_UserTrack\_3545\_11721 range=chr3:162438307-162439306  
5'pad=0 3'pad=0 strand=+ repeatMasking=none\_4  
AGTTTCTGACCAAATGTTGTTCAAGAGAAAAGCTAGAAATCAGATACTGAGGTCACAAATGTTT  
TCAGCATTTCTAACTGTATATTTGATGTCTATAACCTAGACCACACATTTTTAACTGCTAAAAC

TTAGGCAATTTTTATTACGGGATAATACTGACAGGATAAAAAAGCAGTTTGAACAGCAAGCTGTCA  
TTAGC

>hg19\_ct\_UserTrack\_3545\_4858 range=chr15:75929146-75930545 5'pad=0  
3'pad=0 strand=+ repeatMasking=none\_0

TTTATTTACTTATTTTACTCTGTGCGCCAGGCTGGAGTGCAGTGGCATGATCTCGGCTCACT  
GCAACCTCTGCCTCCCAGGTTCAAGCTATTCTTCTGCCTCAGCCTCAGCTTTGCAAACCTAGCCC  
AAGTAGCTGGGTTTACAAACATGTGCCATCACGCCCGACTAATTTTTATATTTTTGCTAGAGATG  
GGGTT

### (3) 200 non-enhancers

>hg19\_ct\_UserTrack\_3545\_158 range=chr12:78319870-78393869 5'pad=0  
3'pad=0 strand=+ repeatMasking=none\_323

AATTTTCTCATTTTCTCATAAAGTTTAAACAGTTGTTTATTTGAGTCAGAATTCAAAATAAGCTTCT  
GTACATTACAATTGGTTTTAAGTTCTTATAAGACTCTATAGTTTTCCCTTCATAATTTTTCTTG  
CAATTTATTTGTTAAAGAAATTGGGTCATTTGTCTATTGAGTGCTCCACTGTCTGTTTTATTA  
TTGTA

>hg19\_ct\_UserTrack\_3545\_57 range=chr7:10106276-10452075 5'pad=0  
3'pad=0 strand=+ repeatMasking=none\_1151

ACTGGTTATCTTTTAGGACTAGTTAATATAACCCATTCTCTAACCAACAGATAACTCAACCAGGT  
TCAGCACCTGATGGGTTACTCTTCAAGGACTCCCTTCTAAATCTCACTTTGCTGTGTCCACAATT  
CTAAATGCTATAACAATAGCATTTTCTCACTCTCATTCAGTATTTTACACAGAAAGATATGCCTT  
GAACC

>hg19\_ct\_UserTrack\_3545\_762 range=chr2:59404297-59409096 5'pad=0  
3'pad=0 strand=+ repeatMasking=none\_15

ATGCATATGTTCTTCAGTAAACAGAGCAGCCACTGGTACCACAGGACAGCCAGTGCTGAGGAGGA  
GAGGGTGAGAGGGGACTCTGCAGGAGGAAAGAACAGGGCTCAGCAGCAAGAGCTGAGAAAAAGGA  
TGAGGGAAGCTAAGACCTTGAAAGAAAGCAGCGCTGGGCTCTGCTCCAAGCCTAAATTTATGAAA  
ACATT

>hg19\_ct\_UserTrack\_3545\_78 range=chr11:21614425-21696024 5'pad=0  
3'pad=0 strand=+ repeatMasking=none\_133

CTGCTCTCCTCGCTCTATAAAAGTCAGAGTGCCTAAGCTGTTAATTTGCAAACCCCTTCTTAATC  
TACCCCTCTATTCATAGTTTATATCCAGAACTATGGTTTAAATATAATCGTAAGGCCATTGACTTTT  
GAATACGTAGCTCCAGTCTTAGTCTCACTGGACTAGGTCTTATATCTAACCACTACCACAAAGTC  
TCCTA

>hg19\_ct\_UserTrack\_3545\_9 range=chr17:51184002-51429801 5'pad=0  
3'pad=0 strand=+ repeatMasking=none\_60

GCTTGGGTATATATTGTCCAATATAGCAGGCCTCATGTGCTCCTTAAACCAGGGCTACTTCAAAT  
AGAGTTGCCCTTTACAGTTGGATAATGGTTAACTTTAAATAGCAAGATGTATCTAGCAAGAGGGT  
TTCTGAAAACCCCTGGGTTTCTTCTTATATTGTCTCTATTTCTAAATTTCAATTTTTAACTT  
ACTTT

>hg19\_ct\_UserTrack\_3545\_997 range=chr2:95475274-95522073 5'pad=0  
3'pad=0 strand=+ repeatMasking=none\_60

TAGAGGGCACTCCTTTTTTGTTCGTCCTCTTTAGAGTTACTACATAGGAGCTTCTCCTCAGGGC  
AAGCAGTAATTCGGAGTTTTCAAACCTTTCACCAATATTCAGCTCGAACTTGTTTGTAATGAAT

TTTAAAGAAAGTCGTGAATATACAGACAGATTATTCCCTTTATCACAATTCTTACCCAGTTCTGG  
TTCTT

>hg19\_ct\_UserTrack\_3545\_6 range=chr13:49222200-49305199 5'pad=0  
3'pad=0 strand=+ repeatMasking=none\_159  
TGCCAATTTACCAGAAGGGTTTCCAATGTGGGAGTTACAGGTGGCAGAGACAGTGGGCAAATAGT  
ATACTCAGAAGGTCAGTACTGAGTAGCAACTAGGGAGGCTTCCGCATGGCAGGTCTACCAGTTTTCCC  
CCTCTGTCTCAGGACTGCTCTACACAGAAGCCTACCATTATTTTCCTTGTAAGATGATGCAAAGT  
GCACC

>hg19\_ct\_UserTrack\_3545\_419 range=chrX:113089936-113172135 5'pad=0  
3'pad=0 strand=+ repeatMasking=none\_410  
CTGATTGTGTATTTTCATATAATCTGTCTTCAAGCTCACTAGTTCTTTCTTCTGCTTGATCAGTT  
CTGGTGTGGCAGACTGATGCATTTTTCAGTTTGTCCACTGAATTTCTTAGCTCCAGAATTTCTG  
CTTAATTTTTTAAAATTTTCAATCTCTTTGTAAATTTCTCTGATAGAATTTCTGAATTTCTTC  
TCTGC

>hg19\_ct\_UserTrack\_3545\_270 range=chr4:96916178-97273377 5'pad=0  
3'pad=0 strand=+ repeatMasking=none\_941  
CCTAGGGAATAGAAAGGAGCACTTCTGTCTTGGCAAAGCTACACTGGTTGTAACAGTGGTTCTC  
AAACCCAAGATTATTAATAATGTAAGTTCTGATTCAGTAGTTCTGGGGCAAGGCCCAAGCTTCTGC  
ATTTGTAAGAAGGCCCAAATAATGTACATGTCGTTGCCACATACCATACTTTTAAGACAAGAA  
GTTAG

>hg19\_ct\_UserTrack\_3545\_165 range=chr5:63555645-63680644 5'pad=0  
3'pad=0 strand=+ repeatMasking=none\_476  
GGATGTCCACTTTAACCCTGCTATTCAACATTGTGCTGGAACTCTAGCTGGAACAATTTGATT  
TAAAAATAATAATAATAATAAAGGCATCCAAATTGGAAAAGAAGTAGTAAAACCTATCTGTATTC  
TGATGTCCTAATCCTGTATACAGAAAATCCCAAAGAATTCAGAAGAAAGCTACTAGAGCTAATTA  
ATTTA

>hg19\_ct\_UserTrack\_3545\_667 range=chr7:34174276-34205675 5'pad=0  
3'pad=0 strand=+ repeatMasking=none\_52  
AACCAGGAACCTAAGCCTGTGCCCTATGCCCTGATGTCTTTCTTCAATTGGCCTTGTGTACCTTT  
TAAAACCTCCCTAGGTGATTCTGACCTGCAGCCAGTGTGAAACCCCTGAGTTAGTTTGTGTGTTT  
ACTTGGGTGGCTGTGGGGAGGTAGGATGATGGATTTTTGGGGTTGCTGAAGCTTCTCAGCTGC  
CCCTT

>hg19\_ct\_UserTrack\_3545\_54 range=chr13:31810801-31876600 5'pad=0  
3'pad=0 strand=+ repeatMasking=none\_278  
TCTGAAATTTTTTTTCTTGTGTCTCTGCCAGTTTTAGTATCAGAATGAGGCTGGCCTTATAAAA  
TGAGTTAGGGAGGATTCCCTCTCTTTTTATTGTTTGGAAATAGTTTCAGAAGGAGTGGTACCAGCT  
CCTCTTTGTATCTCTAGTGAATTCGGCTGTGAGTCTGTCTGGTTCTGGGCTTTGTTTGGTTGGT  
AGGCT

>hg19\_ct\_UserTrack\_3545\_788 range=chrX:24524680-24558879 5'pad=0  
3'pad=0 strand=+ repeatMasking=none\_142  
AGAAAAAGGTGGTAAGTTCTATGTTATGTATAGCTTATCACAATAAAAAATGTTAACATTATAAA  
GGAAAAGTTATCAATCACAGAACAAGTTTCACTGTTTTATGGTAATAAGGAAAATAATCTGTAGT  
TTTCTTCTGACTATGTACCCTTAAGCTTCAACTCTACTAGCAACAGTGGGGTTCTGCTTCATTTA  
ACTTA

>hg19\_ct\_UserTrack\_3545\_61 range=chr1:251538-267537 5'pad=0 3'pad=0  
strand=+ repeatMasking=none\_34  
GTTTAGAGAATAACATTTTGATGGAATCATGCTTTTACTTTCTGCTTACGACTCAATTGTTTGTAC  
TGACATTAACATCCCAAATCCTTAGCATGGCCTACAAGGCCCTGAGCAATGTGGCACCTGCTGAA  
GCCTGCTGCCTCATTTAATAACTCTTTGTCTCTTTCCAGATCCAGCCACTCTAACATTTTTTAG  
CTCCT

>hg19\_ct\_UserTrack\_3545\_1210 range=chr12:110663018-110683217  
5'pad=0 3'pad=0 strand=+ repeatMasking=none\_33  
TGTCTCTGACCTTCTCCATCTTTTTTTGTTTCATATATATTTTTCTCCCTGTTTATGAGTGTAT  
ACTGTTCAAATGTTTTCTGATTCTCTCTCACACAAATTTTCTTGTGTCAGTGGTAGGTTCACTTTTG  
AAGCATCTTTCAAAAATATATTTTCATTTTAAAAAATATATGCCGTAGGTATGATTGCATAACTC  
TGAAG

>hg19\_ct\_UserTrack\_3545\_1825 range=chr1:198655578-198668377 5'pad=0  
3'pad=0 strand=+ repeatMasking=none\_25  
CATAGGTCCTTTTCCCCAACCTTTCTTTTGGGGTATACTCTTCCCTACGTAGGACATCATCTCTG  
TCTGTTTTGCTTTGGTTTTGGTCTCCTGATTTTCTGCCCCACCTTTGCTCTTTAATAATCCAT  
TTTCCATTTCTGAAAGGTTGATCTAAAATTCAAATGTTTCTCCTTTAGGCCTCCCTTTAAAGAC  
ATCCC

>hg19\_ct\_UserTrack\_3545\_321 range=chr9:5818601-5832000 5'pad=0  
3'pad=0 strand=+ repeatMasking=none\_43  
AAAAGAAGTGCTTCAATTAGGCCATCCACTAAAAGGATTTAGGTGATAGTCTATTTCAAGGGTGT  
CCAATCTTTTGGCTTCCATGGGCCACATTAAGAGAAGAACTGTCTTGGGCCACATATAAAAGACA  
CTAACACTAACAACTCACTGATGAGCTAAAAAATAAAAATAAAAATTGAAAAAAAAATCTCACGTTT  
TGAGA

>hg19\_ct\_UserTrack\_3545\_248 range=chr2:135763731-135800930 5'pad=0  
3'pad=0 strand=+ repeatMasking=none\_16  
AGTTTTAGATGCTTATGGGTCATTTGAATTTTTCTTTTTTAGTATTATATATAGTTTTTGTGTAG  
ATCCTTAGTCTAGAACACTCTAAGAGACCTCAAACACATTTCTACCATTTTCATTTAATTACAGT  
GATTCAGTGAAATTTTTATGCTGAGCTTTGAGAAAACAGCAGCCTTCATTTGGAAGTGTAGTCA  
TACAG

>hg19\_ct\_UserTrack\_3545\_435 range=chr4:176458407-176691406 5'pad=0  
3'pad=0 strand=+ repeatMasking=none\_441  
CTCTCTAAAACATGTAGAACAAAAATAATGAGCTCATGTCTGTAAGAGTGCCATAAAAATAGAAAA  
AAATATTAGAACTCTTTTTATAATTGGTCTTTAATAAATTATCACTGCATTTTAGAAGCAAACCTT  
ACTTCAATGCTGTGGTCATGTAACCTTTTTAATTGATAACTAGTTTAATAAACATTTATTGCTTG  
CTATG

>hg19\_ct\_UserTrack\_3545\_292 range=chr5:147101408-147202207 5'pad=0  
3'pad=0 strand=+ repeatMasking=none\_170  
ACAAATAATGAATGACTAGGGGTTTCTGAGCATTCCATGATACTAGGATATAAGTCAATTAAACA  
CACACCCCTTTGAAGAGCCACAATGAAAATTGAAATCATTTAATTTATTCTGCATATATATGTATA  
TCCTGTATTGCTCTAACAAAAAGAAACACAGTTATTTGCAAATATCCATGTGAAAGCATGAGAA  
ATAAA

>hg19\_ct\_UserTrack\_3545\_770 range=chr8:48146853-48172047 5'pad=0  
3'pad=0 strand=+ repeatMasking=none\_61

ACAGGTGATCTGCCACCTCAGCCTCCCAAAGTGCTGGAATTACACGCGTAAGCCACCACACCCA  
GCCTCCAATTTTATTATTTTAGGTGCTATTATAAATAAATTATTCTCTTAATCTTCTTTCTGGGT  
TGTATAGAAGTATAAATGACATTTGTATGTTGATCTTATAGCTTACAACCTTCTGAATTTGTTTA  
TTAGT

>hg19\_ct\_UserTrack\_3545\_1451 range=chr1:153240977-153250376 5'pad=0  
3'pad=0 strand=+ repeatMasking=none\_10  
TAACAAATTTATTGTAGCTATTATTATTTTTAATAGCTTAGTCTTTTAACTTTCATACTAAAGATA  
TAAGGAATTTACACATCACCATTACAGCATTAAAGCATTTTAAATTTGACTATATAATACTTTTA  
CCCTGTGAGTTTTATATTTTCTATGTTTTTGTGTTGCTAACCAGTGCCCTTTTCTTTCATCTTAA  
AGAAT

>hg19\_ct\_UserTrack\_3545\_121 range=chr10:56851795-57019594 5'pad=0  
3'pad=0 strand=+ repeatMasking=none\_3  
TGAGAAGAAAACAAATTAATGACAAACAGACTAGAATGCACCAATAAAAACCTTACACCAAGAACT  
GTTTTAGAAAACATGCTTATTGCTCTGTTTGTCTTCTATTCTTTGTCTCATATTGTATTTCAAT  
TTTGAAAGTAAGTTTATGTAATATAAATAAGTTGATCAATTAACAAAATACATAATCTAGACTCA  
CATAT

>hg19\_ct\_UserTrack\_3545\_612 range=chr6:30182622-30186821 5'pad=0  
3'pad=0 strand=+ repeatMasking=none\_14  
ATTTAAAATACTTTGTATTCCAAATTTGGTGACTTTTAAATGTCTATTAGCTCAAAAAGTTAGTGA  
AAATATATTGTATAATATATAATGACAAATTCAACTTAAAAAAAATTTTTTTTTTTTTTTGAAA  
CAGGGTCTCACTCTGTCAACCAGGCTAGAGTGCAATGGTGCAATCATGGCTCACTACAGCCTCGA  
CCTCC

>hg19\_ct\_UserTrack\_3545\_55 range=chr6:2750602-2761201 5'pad=0  
3'pad=0 strand=+ repeatMasking=none\_44  
TGCTGTGGCACAATTATAGCTCACTGTGGCCTTGAATTCCTGGCCTCAAGTGATCCTCTCGAGTA  
GTGAGGACCACTGGTGCACAATACCACGCCAAGCTAATTGTTTAAAAAATTTTTGTAGAGATGGA  
GGTCTCACTTTTTTGGCCAGGTTGGTCTTGAACCTCCTGGGTTCAAGTGATCCTCCTGCCTTGGCC  
TCGCA

>hg19\_ct\_UserTrack\_3545\_54 range=chr14:42080651-42293650 5'pad=0  
3'pad=0 strand=+ repeatMasking=none\_995  
GCTTATCATCCATAGTAAAATCAGAATTACCCTCAATATGACAGCCAAGGTATTGTTGACTGTCT  
CATTTTCTATCAGATCCAGATAAAAATAGGAGAATAGTTTTTCATTGACTTACGCAATATTTACA  
TGGCCATTA AAAAGAAAGATACAGGTTAAAATTATTTTCTTAAATTTCTGAGGTAGAGTGAAAATG  
AAATA

>hg19\_ct\_UserTrack\_3545\_75 range=chr17:63290739-63354738 5'pad=0  
3'pad=0 strand=+ repeatMasking=none\_1  
CCCTACTACCACATAGAGGTGTTGGGCTATTTAAGTGAGAGTCCACATGAATAGTGCCTGCCGCC  
TAGTAAGCACTCAGTACATCTGAGTTATTTCTTATTAATTCGACAAGATGTTTCAGGAGAAGCTGG  
TGCAAACCTGCGTGGCTCCTGCCCCACTTGCCCCGCTCCTCACCCCCCTTAAAGAAGCAAGAGGA  
GGCTG

>hg19\_ct\_UserTrack\_3545\_376 range=chr4:149516351-149746750 5'pad=0  
3'pad=0 strand=+ repeatMasking=none\_106  
AAACAGTAATCATACTGAAGAAATTA AATAGAGCCACATAGCAAAATGTGACCTAAATGCAGT  
ACATAAGCCAAAACATAAATTCATAACTAGATAAATCAATGGATAGACTTTTATGCTACCAGCAA

TAATGTAGTAATTGGGCCTAACTTACCCTCCCACAGTAAAAAAAAAAAAAAAAAAAAAAAAAAAAACAA  
ACGGA

>hg19\_ct\_UserTrack\_3545\_138 range=chr13:86526400-86760199 5'pad=0  
3'pad=0 strand=+ repeatMasking=none\_492  
TGGAAAAAATGCCAGATAAGAAGCAAGACTAGCTTGCAGCTCCCACTCAGACAGAACAGTGTGTG  
AAGGCTCATCTTGTGAACTTTTGTCTCCAAGAACTGCCACAGAAATGTTTGAGAAAAACTGAAAGA  
ATTCACAGACCCTTTGAAAAAGCTGCTTACTGCTGCAAACCTCTGATTGATAGACAACCAAAAAG  
CACAC

>hg19\_ct\_UserTrack\_3545\_1548 range=chr1:160847577-160854376 5'pad=0  
3'pad=0 strand=+ repeatMasking=none\_9  
TAGCTAAGAGGGACCTTTTCCCAACCCAGAGATGAAGAGCTGGTCCTCAGAGAGGGCTCCTCAT  
CTGCCAGAGGCTTGTGAAGAGAAATTCAACTCTGCAGGAAGATCACCCTGAACATCTCCAAGGG  
CTGAGTTGCAGAAATTAACAGATGTATTCCTCTGTTCTTACATTTTTCTTTCTCCTTTA  
TTTTA

>hg19\_ct\_UserTrack\_3545\_143 range=chr8:43392244-43759643 5'pad=0  
3'pad=0 strand=+ repeatMasking=none\_1590  
AGAATCTGTGAAGGAACATTTGTAAGCCCATTGAGTTTGATAGAGAAAACGGATTACCAACATA  
TAAAAACTTAAAAGAACTATCTGTGAACTGCTTTGTGATGTGTGGATTCTCACAGAGTTA  
AGCCTTTCTTTTCACTCTGCAGGTTGGAACACTCCTTTTCCAGACTCTACTAAGGGATATTTGG  
GAGTT

>hg19\_ct\_UserTrack\_3545\_101 range=chrX:4500201-5186400 5'pad=0  
3'pad=0 strand=+ repeatMasking=none\_1231  
GGTGATTGAAAACTACATACCTGGTACTATGCTAATTACATGGGTGGTGAATAATCTGAACAC  
CAAACACCCGCGACACATAATTTACCCATGTATCAAACCTGCACATGTACCCTGAACCTAAAAT  
AAAAGTTAAAAAAAAGATCTGATAGCCAACTATAACCATGGTGGTTACACAATTATGTACATA  
TTTTT

>hg19\_ct\_UserTrack\_3545\_310 range=chr5:154640808-154832207 5'pad=0  
3'pad=0 strand=+ repeatMasking=none\_453  
CAATAAGAAAACAAGCAATAAGAAACCATATTGGCCATGTGGATAACTTCTTTGGTAAGGTGTCT  
TTTAAGGATAAAGATCTTAAAAGGATAAAGGATAAAGACCTTTTAAGGATAAAGACCTTAAAAGA  
CACCTTGCCAAAGAAGTTATCCACATGGCAAATAAACATATTAATAAATGCTCCAAATAATGTGT  
TATAA

>hg19\_ct\_UserTrack\_3545\_187 range=chr1:104092478-104271877 5'pad=0  
3'pad=0 strand=+ repeatMasking=none\_107  
GTTTTTTTGTATGCAATTCTCGATCTTTAAAGAGATGACAACAAATTTTGGTTTTCTACTGTTAC  
GTGAGAACATTAGGCCCCAGCAATATATCATTGTGTATGGAAAAATAAAAGTGTGCCAGAACCA  
AAAAACATTAATTTCTAAAAGGTCATTTAGATGATTTCCATGAGAGACTTTTTAATGTTCTTCT  
CCTGT

>hg19\_ct\_UserTrack\_3545\_98 range=chr13:69502000-69861199 5'pad=0  
3'pad=0 strand=+ repeatMasking=none\_395  
AAAATAAGAACTTTTCAGAAAAGTGAATTAATTAACATATATAACAACAACATAAGATTTA  
TTCTTTACCTGCAATAAAAATTTGCACCATAAAAATATTTTCAAAATATTTTATATATATAATCT  
TTTAAAAATTATATTTTTGTAGAAAAATACTAATTTTTTCATTAGTACTAAATCTAAATTTTTATT  
TTTCA

>hg19\_ct\_UserTrack\_3545\_232 range=chr7:125237165-125310964 5'pad=0  
3'pad=0 strand=+ repeatMasking=none\_195  
AAATACAAAAGACTGAAGTTTATTTATATAAAATTCTGGAGATGAAAAATCTAGTGACAGAAAA  
TTATTGGTTGCCTTAAGATGAAAGTCAGGAGAGAGAATCCACTGCAAAGGACCGAAGGAACTTT  
TTCAGGTAAGAAATTAATTTGATATCTTACTTGGCTTTACACAATTACTAAAATCAAATTTCAA  
CTTAA

>hg19\_ct\_UserTrack\_3545\_11 range=chr8:13585630-13777229 5'pad=0  
3'pad=0 strand=+ repeatMasking=none\_747  
AGTCAATCCATGTAATGTGAACAAGAAATGGTTCTCGATACAGTTGTCATTGTTTTAAGCCACTG  
GTATTTTGGTATCAATTTTTACTGTAACAAAATCTATCTAATAAACATCTCCAAGATATAAAGTA  
CCCAAAGTAGTCAACCTATTGTTAGATGGCCAGTTAGTACCTTCCAGGGAATAAAACCAAATTGG  
GAGGT

>hg19\_ct\_UserTrack\_3545\_1209 range=chr9:128891580-128906979 5'pad=0  
3'pad=0 strand=+ repeatMasking=none\_5  
TGTGGGTGGTCCCGGCTGGTCATTCCAGCTTTGACTTTGGAGGGAGGGAGCTGGAAGAGGAAATG  
GGCTAGAGGGTGTATGGACACCCATCCATTCTATGGGGCCTGGGTCTCTCAATGACCCACAGATC  
ACTGTGGCAAATATGACACTATTGGCCAAAGTTTTGTAATTGGAACGGGAGTCAGTCTACAGCAG  
TGGTT

>hg19\_ct\_UserTrack\_3545\_130 range=chr1:71151413-71210812 5'pad=0  
3'pad=0 strand=+ repeatMasking=none\_292  
TTTTGTTGTGGTAGTAGTTACTATTCTTTTCATTTCCATGTTTAGAACCCTCTTAAAGACCTCTCT  
GGATCTTAAGGACCTCAGCTTGTCTGGAAAGGATTTTATTTCTCTTTTGTATTATGATGCTTAGTT  
TGGTGGGATATGAAATTCTTGGTTGACATTTATTTCTTTAAGGATGTTAAAAATAGCTTTCTAA  
CTTTT

>hg19\_ct\_UserTrack\_3545\_388 range=chr4:157598751-157812350 5'pad=0  
3'pad=0 strand=+ repeatMasking=none\_919  
AGAGTAAATAAAAATATACGTTTTGCTTACCTTTTAAATGTTCTTTCTCCTCTTTTCTATGCCAG  
TCCAGATGCTTGGATATAGTTCCCTACCTGCCAGTAGATGGAGATAGTAAAATTGAGTCTTTTGGT  
GACCTCAAATCCTAATCTAGGTGGTTCAGAATCTTCAATTCAGATTTTGAAGTTAAAAAATT  
TGAAG

>hg19\_ct\_UserTrack\_3545\_333 range=chr1:238402378-238546577 5'pad=0  
3'pad=0 strand=+ repeatMasking=none\_275  
TTAATGTAGTGAAGATGATGAAGAGAACCAGTTTAACTGTTAGAGAAGGTATTTACAAACAA  
GGCTAAAAAGAATCATGAAGTTTTGGATTAAAATTGGAGGTATTGATAGGAACTCATTTGTTAAAA  
GTATATACCTATAGATATTTAGTTGTGGAATTATTATTACTATTATTTTGAAGGAGTTTC  
ACTCT

>hg19\_ct\_UserTrack\_3545\_264 range=chr7:144206668-144382667 5'pad=0  
3'pad=0 strand=+ repeatMasking=none\_749  
ACTCACTATCACAGGAACAGCACGGGGGAACCGCCCCACGGTCCAATTACCTCCTCCTGGTCCC  
ACCCTTGACACGTGGGGATTATGGGGATTACAACCTCGAGGTGAGATTTGCGTAATGACACAGAGC  
CAAACAGTATCAAGATCCTTGAATAACGTCCTTTTCATTCAAGGTCATTTCTTATAAGGTTGATG  
AGGAA

>hg19\_ct\_UserTrack\_3545\_1010 range=chr11:83382753-83392152 5'pad=0  
3'pad=0 strand=+ repeatMasking=none\_19

TGATTTTGTTCAAAATACAATAATTCTTGAGCCTGGTAACATATATTTTAAAGTTCACATTGATT  
GACTCCAAATCTGTATCCACATTGTAAAGAATCAGAACATTTGACTGTGGTTTAGCTTATAATTC  
AACGGTCATTTTTCAACAACAAATTTTTGTGAGACTGATACTTTAGGTTTTCTGTTCCCTTATTCT  
ACTGG

>hg19\_ct\_UserTrack\_3545\_231 range=chr9:119906980-120009579 5'pad=0  
3'pad=0 strand=+ repeatMasking=none\_15  
AGTTAAGTATTAATAATTTCTGTTTCAGAGATGAGGATAGCAAGACTCAGAAATGTTACATGGTTT  
TTCCAGGTCATGCAGCTTAGGGACGATAGAAGTGGGATTTGGACTCAGGTTATGGTGACTCCAAT  
GCTCTGGCCTTATCTGTTGCTGCACTCTATAAGTACTCCCTCTCTGGTTGGCTGGAGATGGGTAT  
GTTAA

>hg19\_ct\_UserTrack\_3545\_280 range=chr7:152557268-152591267 5'pad=0  
3'pad=0 strand=+ repeatMasking=none\_146  
GTGGACAATGGTCTTGATGTCTGACACCTCATACGTCAGGAGCTTTTTTGATTGTTAGCTGCTA  
GCTTCTGCGTGATTTTTGTGTCTTTTAAATTTTTATTTTGTTTTTGTTTCTTTACTTTTGGGGT  
CATATTCAGAAATCATTGCCAGACCAATGCCATGGAGTTTTTTTCACTGTTTTCTTCTAGTAG  
ATGTC

>hg19\_ct\_UserTrack\_3545\_541 range=chr13:70099200-70111599 5'pad=0  
3'pad=0 strand=+ repeatMasking=none\_27  
TACTGCACCACTAACCAGTCATTCCCTCATCTCTCTCCCTCTCCTTGGGCATCTATATCCCTGA  
GACACAACAATACTGAAATTAGGCCAAGTAATAACCTACAATCACCTTTAAGTTTTACAATGTG  
TTGACTTAAAGACAAAAATAAAGGCAAAATTAATATAAGTGGATAGTTTACTTGAGCCAAATATA  
AGGAC

>hg19\_ct\_UserTrack\_3545\_92 range=chr11:29454625-29641824 5'pad=0  
3'pad=0 strand=+ repeatMasking=none\_659  
ACAATGCTTAGAGTTCAAATAATAATCTAGATTGATAAGCATTTTCATCTAAAATGCTCCTTGAC  
AATCACATGTATGTTACAAATAGCTTTTATTTTTTAAACAACATGGGCTTAGAAGTCAGGAAAA  
TTTAAATACATGTTTATTTTCTTTGTATTATACAAGTATGTGTATGTGTGGGCACATACACAAA  
ACACA

>hg19\_ct\_UserTrack\_3545\_106 range=chr8:24435111-24542910 5'pad=0  
3'pad=0 strand=+ repeatMasking=none\_274  
AAATCTGGTTGTGTCTTTATGTCACACTCAGCGCTCTTCTCCTCCTCACTCCCTGCTTGAGAAC  
TTCTGTTTTTATCCAGGTGTCTCAAGCAAGTTTTGGAAATTCAGTATTCCTTCAACCACTGATTA  
GTGATGGGACCTTATGAAATGTCAAAGAGCATTATTTTTGTGAAAGTAAGAATAACAATAAAGAG  
TAGTA

>hg19\_ct\_UserTrack\_3545\_1512 range=chr4:127513551-127525350 5'pad=0  
3'pad=0 strand=+ repeatMasking=none\_27  
TTCTGGGAGTAGCATCAGCATAGGTAGCAAAGTGTAAATATACCCTAAATCAGATTACTGCCATT  
GAGGTTATCACTAAAATATCATAGTTGCTTAAATTTAAGGCAAATGATTCTTCACTTATTTTTT  
CTATAAATCAATGTAATAAGTTATGAATCATATTTTTATTTTTTATCCCTGGAGAAAAAATTC  
ATACG

>hg19\_ct\_UserTrack\_3545\_1202 range=chr10:100551011-100612410  
5'pad=0 3'pad=0 strand=+ repeatMasking=none\_241  
AGAGAACATCAACAATGTTTAAAGACAACATATTAATTTAAAGAAAGGGGATACAAAGATAACCAG  
TCCTCCAAATCCTCACAAATTTAGTAGGAGAAATAGGAGATACACATAAATAGTTAGAATAAAAGG

TACACAGGTCAAGTGACCAAGCCTGATTCATTTTTATATTCCTCACAGGAACACAGTGCTAGGTG  
TTCAA

>hg19\_ct\_UserTrack\_3545\_63 range=chr17:51430002-51594001 5'pad=0  
3'pad=0 strand=+ repeatMasking=none\_659  
AATAGCTTTAATCTGTTTGTAAATCATCTCTTATTAATGTGATACATTGGATATACTGAGAATATA  
GATTTTTCCAAGAAATATATTGACAAAGTGAAATTCCTCTGGAATTGTTTCTACCTACATATCCC  
ACCAACAACCTGAAGTCAACAGGCAGTGACACCAGCACTTACTCTACAAAGCTTGCAATATTGAAT  
ATAAT

>hg19\_ct\_UserTrack\_3545\_213 range=chr7:118015365-118343564 5'pad=0  
3'pad=0 strand=+ repeatMasking=none\_1557  
TTGGTTTCATCACAATGCCATAGGTATAAAATTAATAGTTAAAATCACTAAAATGGTAGATTT  
TAAGTGGCCACTCCATGAAAAATGAGAAGTATATGAGGTAATGAATATATTAATTAGTTTGTCT  
AGCCATTCCACTGCAATGTACATATATTTTAAAATATCATGTATATGACAAATATACACAATTTT  
TATTT

>hg19\_ct\_UserTrack\_3545\_1268 range=chr8:114184425-114214424 5'pad=0  
3'pad=0 strand=+ repeatMasking=none\_51  
GAATAGGTTGATACATATAAGGAAACACAGAATGTAACCTCAGAAAATAATCTTAGGGTTGCACT  
TTGAAAAGACTTGAAATTAGCTGTTTTAGGGTCAATGCTAAGCTGCTGCTGATGCTGCCAAAAAA  
AAAAACAAAACAACAAAAACAAAAAAACAACAAAAACAAAAACAAAAAAACTCACACGAATTG  
CTTAA

>hg19\_ct\_UserTrack\_3545\_1451 range=chrX:101860545-101905944 5'pad=0  
3'pad=0 strand=+ repeatMasking=none\_225  
TGTTATGACCTCCTGCGGGTCTTGACAGGGAAAGGTCTCTTTTGGGGGCAACTGTGGGGACGGT  
GCAATGCCAACGTGAGCCACCATTGAAATGAGAAACAGCGGTGTGGCAGAAAGAAATGAGTCTG  
GTGCAGACCAGTGGTTGGTTTCCTAGGGTTAGAGGTCTAGGTCTACCTTCTTTTAGAAGAGGGGC  
AGTGG

>hg19\_ct\_UserTrack\_3545\_273 range=chr13:29395601-29484800 5'pad=0  
3'pad=0 strand=+ repeatMasking=none\_25  
CTTATTAGTCTTTTTACTCTGTTTACTGTAGACCCATTGTACCAGTATGTTTCTAGTTCCCATAGAA  
AAACAAAAGAGTGTTTACACACAGTCATTATAGATAAGCCAGCAGTGTGTGTGATTAGGGCCAAA  
CCAGTATTGATGATGGCCTGATACTGACTTTAGAAAGTTTACTCACCTTGCAGAAATGAAAAGC  
CAACA

>hg19\_ct\_UserTrack\_3545\_235 range=chr9:120932780-121147779 5'pad=0  
3'pad=0 strand=+ repeatMasking=none\_873  
AATTACATAGAGTATGTGATACCTGCTTAATATATGCATATATAGTAAAAGTGTGCAAAGAAAG  
CATCAGAAGACACATACGTAATTCAGGAAAATGATCAGGGTGAAGCAGGAGAGAGAAGGAGGTGT  
GTCCAAGATAAAACAAGAGTTAACTTCAGTGATGTTAGAATTGTTTTGCTTTAAGTCAGGTGAA  
ATGCT

>hg19\_ct\_UserTrack\_3545\_233 range=chr7:125342365-125764764 5'pad=0  
3'pad=0 strand=+ repeatMasking=none\_1248  
CTGTGGAACCATGAATTAACCTCGTTTTCTTCATAAATTACCCAGTCTCTCAGGTAGTCTTCATA  
AATTACCCAGTCTCAGGTAGTTCTTTGTAGCAGTGAAGAACAGACGAATACAACACTACTTAATAG  
ATTCTTGATCTTAGGTAACCTTACAACCTATTTAAATTTTCAAGTGTCTTGTATTATATGTAAGCTA  
TAATA

>hg19\_ct\_UserTrack\_3545\_221 range=chr5:101313902-101559501 5'pad=0  
3'pad=0 strand=+ repeatMasking=none\_30  
GAATATGTTGAGTACTTAATATGTGTTGGAAATAAAAGCAAATGCATGAATAAGAAAAGAAAGTCT  
GGATAATTAAAGAGTTTGTAAATTATACTATGTTCCCAAAGTTCAATTAAAGTATTGGGCCAGAA  
TTCATTAGATAGCATGCCTTGTGAATACGAGTTGTGTTGGCTGACTCTCACATAAATGAGTTCA  
TAGAG

>hg19\_ct\_UserTrack\_3545\_383 range=chr4:156363951-156395750 5'pad=0  
3'pad=0 strand=+ repeatMasking=none\_15  
AATATAAATAATCCTTATTGCCATTTTAAGTATATTCTAAATTTTTCTTTTTGATCTCCTGCAAA  
CCTAAACAGTATATTATAGATGTCCAAAATGTATTTATTTGCAAACACTTTTTATAACTTGGGA  
ACTTTTTCTGAGATAAACCTCTGAAATTTTTAATTTTTAATAGTAAATATGATTTGATGTGTGT  
TTGCT

>hg19\_ct\_UserTrack\_3545\_100 range=chrX:3881201-4181000 5'pad=0  
3'pad=0 strand=+ repeatMasking=none\_882  
GGTAAAAATTGGGATGTTAGCATTGTCTTTCTGGAGACTTTGGTGGGCTGGAGTCTTTGCTTAGT  
GATGGCTGTTGAGGTTGCTTCATTAGGGGTAGGTTAATTTGGTAATGAGCATTCAAAGACCCCAA  
AAAGACACCCTACTCCCCTGTCAGAGCATGCAGGAACCAAGAGGACTGCAAACCTAATGACATGG  
GCATG

>hg19\_ct\_UserTrack\_3545\_64 range=chr18:29080803-29133802 5'pad=0  
3'pad=0 strand=+ repeatMasking=none\_112  
ATATACAAAAAATTAGCTGGGTGTGGTGGCGGGCACCTGTAGTCCCAGCTACTCGGGAGGCTGAG  
GCAGGAGAATGGTGTGAACCCAGGGGACAGAGCTTGCAGTGAGCTGAGATCGCGCCACTGCACTC  
CAGCCTGGGCAACAGAGCAAGACTCCATATCCAAAAAAGAAAAGAAACATGATTTAATTCTGC  
CCAAA

>hg19\_ct\_UserTrack\_3545\_1098 range=chr7:81630065-81646664 5'pad=0  
3'pad=0 strand=+ repeatMasking=none\_25  
GCAAAATTCATCTTACTGTAAAACGTGGTGTGAGTCTTTTAATATCTTCCAAAGACACATCTACT  
CCCATCACACCAAGAATCAGCTGGTTCATAATAAGAGGGCAAAAAATGGCATTTTATGTCAAAA  
ATTTACGTATTTTTACACAATTATCATATGATCATCTTTTGCTTGCATTATGGTTATATCCACA  
TTAGT

>hg19\_ct\_UserTrack\_3545\_102 range=chr4:19226903-19415302 5'pad=0  
3'pad=0 strand=+ repeatMasking=none\_759  
CGATCCATTATGTGGAGTGATTATTTACCATACTTCTCTGGCTTGATTCCTTTTGATACTGATCT  
TATTTATAAGTGCTTTTCAGAAATTTCTTCTGGAACAAGGAAGGCAGATCCATCTACTTCCTCATC  
TACTTCGTGGCCTTTTTTCTCTGTCTCCTTATGTTCTCTGAATCCTGGCTCTGCCTGAGAACGCG  
TCTTC

>hg19\_ct\_UserTrack\_3545\_274 range=chr3:139847711-139935110 5'pad=0  
3'pad=0 strand=+ repeatMasking=none\_360  
TGTGTTAAGCCTTCCCCAGTACACCCCTCCCTATCCAAGTTGACACATCACCAAAGGACCTTGA  
TAGCATAACCTTGAAACTGCTTGTTCCTTAGGAGTCTCCTCTCCCAAAGGGGCATCTTGAAGTC  
AGGGAGGTTGACCTCAATCCTAGCACAGAACAGAAGTGTCTGTTAAATACAAATCTACATAAATG  
AGCAT

>hg19\_ct\_UserTrack\_3545\_73 range=chr16:33141100-33205499 5'pad=0  
3'pad=0 strand=+ repeatMasking=none\_209

GTTGCCCTGCTACACTCCCATCACTAACATAGTAAAAATAATGATCAATAAATACTGAGGGAAC  
CAGAGGCCAGCGCTGGTGGGAGTCCTCTGTATGCTGAGCACCGGTCCCCTGGGTCCACTGTTCTT  
TCTCTATACTTTGTTTTAGTGTCTTATTTCTTTTCTCAGTCTCTCCTCCCACCTGACGAGAAATA  
CCCAC

>hg19\_ct\_UserTrack\_3545\_1587 range=chr2:172366755-172372354 5'pad=0  
3'pad=0 strand=+ repeatMasking=none\_24  
TGGGGCCCCCAAATCACTCAGCTAAAGGGAAAAGTCAAGCTGGGAAGTCTTAGGGCAAACCTGC  
CTCTCTATTCTATCCAGTCATCCCTCTGCTCACTGAGATAAATGCATATCTGATTGCCCTCTTTG  
AAAAGGCTAATCAGAAACTTTAAAAAATGCAAATTTCTATAATCTGGAAGCCCCCTCCCATTTTT  
AGTTG

>hg19\_ct\_UserTrack\_3545\_583 range=chr7:26721876-26725875 5'pad=0  
3'pad=0 strand=+ repeatMasking=none\_4  
GAGTATAATAGCTATATGCCACTCACTCCTATAATCTGAACTTGCAAGTGAAATCTAATCAACGT  
TTTAGTTTTATAACAATTGCAGCTAAATTGGTTTTAAAAAGACTGTGAGCTATATAAATTTAGG  
AATGATTCCAAGAAAGTTTCTTGACAGGAGCTGAACTAATCAGTTTGATTTCTTTATTAAGTAG  
TTAAC

>hg19\_ct\_UserTrack\_3545\_10 range=chr16:25850500-26383699 5'pad=0  
3'pad=0 strand=+ repeatMasking=none\_598  
ACGGAGCTTCTCCTCATGGCTGGTGTGGCTCCTCACAGCATGCTGGTTTTCAGGGTCATCAGAAG  
TCTTACAAGGTGGCCGACTTCCCTCAAGGCACAAAAGCAGATGGTGCCAAGCCTTCAAATGTGT  
GATCACTGACATCCCAGAATGTCACGTTACCCACATTGTATCGTAACCATAATAAGTTCATTGCA  
CAATG

>hg19\_ct\_UserTrack\_3545\_519 range=chr10:38946395-39047594 5'pad=0  
3'pad=0 strand=+ repeatMasking=none\_98  
ATCCTGTGTAGAAATGCCTTTGGTGTCTCCTGCCAGAATCCATTTACCAGGTCAATGAACACATCT  
CCCAGTGCTTCTTGTGGCTGCTATTACCTGCAGGTTTCTAGAACCCTTGTCTGCTGACAAGCA  
CCTACTTGGAATACTAGGGAGGTTGTGCACCCCTCTATTTCCCTCCAGACAGCATCTGCCAAT  
GACGG

>hg19\_ct\_UserTrack\_3545\_109 range=chr6:50160842-50226841 5'pad=0  
3'pad=0 strand=+ repeatMasking=none\_170  
CCTGCCTTTTTTTGTTCTCCATTTGCTTGGTAGATCTTCTCCATCCCTTTATTTTGAGCCTACA  
TGTGTCTCTGCACATGAGATGGGTTTCTGAATACAGCACACTGATGGGTCTTGAATCTTTATCC  
AATTTGCGAGTCTGTGTCTTTAATTGGAGCATTTAGCCCATTTACATTTAAAGTTAATATTGTT  
ATGTG

>hg19\_ct\_UserTrack\_3545\_148 range=chr21:26743530-26758129 5'pad=0  
3'pad=0 strand=+ repeatMasking=none\_33  
TTTGTCTGTGGACTAGTTAACCAGTGGGTTTTATACTTTTTGAAAAGTTTTCTTCTGCACATTA  
GTGTATTTTTCTTTCAGATCGAAGAACACATTTTACCATTTCTTGTAAAGATGGGTATGCTGGTGA  
CACATTCTCTCGGCTTTTGTGTCTGGGAAAGACTTTATCTCTCCTTTATATTTGAAGGATAGT  
TTTGT

>hg19\_ct\_UserTrack\_3545\_71 range=chr10:26047195-26164394 5'pad=0  
3'pad=0 strand=+ repeatMasking=none\_336  
TGCCCAGGGCCTTCATACACATTAACATAATTTAATCCACAAACAATCCGATCAGGTAGGTACCGT  
AATTAATGGGTGCCATAATTATCCCATTATTAACCTAGTTCAGAAATATAAGGTATAAGTCAGG

GGTCTAACTTTTTTCTCAAATGAAATGATCATTGTTTCAGCACACTTTATTAATAATGGTTT  
ATTTT

>hg19\_ct\_UserTrack\_3545\_1536 range=chr2:165336355-165352154 5'pad=0  
3'pad=0 strand=+ repeatMasking=none\_2  
TATCAGAGGGACAAACTCTTCAGAAAGAATGCCTTTTGTATGAAATTTTATATTCTTAAACTTC  
ATCATCAAATCAATTAAACTTATTTACAAAAGGAAAAATCATTCTCCAAATCTCCAGACCAT  
GCATTTAAGATAGAAATAATTTATGATTCTTTATAAATAAAAATCAGATGCCCGAAAAACTAAG  
ATCAA

>hg19\_ct\_UserTrack\_3545\_9 range=chr13:54983200-56951599 5'pad=0  
3'pad=0 strand=+ repeatMasking=none\_2890  
ATGTTTGTGATATATGTATGTGTGTATGTGTATATACACATACATCTTAGGACTTGTGAATCATC  
TTAGGGCTTCCTACCTGTAGGCAGAAAGAAATGATAACTCAGTAAGGCATATTATCCTAAAGTAA  
TACTATACGTGTGTATATCAATGAATTTATACATCTATTATGGTGTGTAGCACAGTTTAAATTCC  
TTGAT

>hg19\_ct\_UserTrack\_3545\_1177 range=chr6:117602508-117638507 5'pad=0  
3'pad=0 strand=+ repeatMasking=none\_107  
TGGACAAGTCATTCTACCTTCTTGACAATGCTGGGTCTCCCATGTCAAAGTGAGGGTCTCCACT  
CAATGATCTCTTTGTAATTCTCCCAAAGTGGGGTACTGAGCAGTTGGCTTTGGTGGTACCCAT  
CTCTTCTAATTGAAGCCTACAGAGGAGTTTCCAAACCCAGATATCCAGTATCTTCACCCTCCCG  
CCTCT

>hg19\_ct\_UserTrack\_3545\_405 range=chrX:108116545-108297144 5'pad=0  
3'pad=0 strand=+ repeatMasking=none\_11  
ACATGAACTCCCCTGAAGGAGTGAGGACAAAAGGGAATAGACAGGGGGCAAGAACTGAACTTTGG  
GAGACAGTCAGAGGGAATAAGTGGGAGGAAGGAGAGCTGGAACAGCCAAAGACAGAGACATTTAA  
AAAAACACACACACAAAAGGAGAAGCAATGTGACAGAAGCCTACTGACTTTTGGACTAATTCATT  
GGTCC

>hg19\_ct\_UserTrack\_3545\_44 range=chr12:7708734-7741333 5'pad=0  
3'pad=0 strand=+ repeatMasking=none\_89  
CCTAGTAAGTACCACAGTCAATGCCACTAGCTTCAGATATATACCTTTGTTGCTACATTTATTTA  
AATATTTTTTCAGCAATTTTCTTTTATTACATTTACATGAGTCCAAACAGAAAAAAATGATGAT  
ACTGTCAATGTGTATAGGTCTCATAAAATTACAGTTAAGACAACACACATTAATTGTGCCGAA  
AATGA

>hg19\_ct\_UserTrack\_3545\_900 range=chr14:107173356-107183155 5'pad=0  
3'pad=0 strand=+ repeatMasking=none\_19  
TATCTGTTTCATTTTGCATTCTGTTAGCAATGTTTTAGCCTCTAGCAACCTGGTATGCTCACCA  
GCATTGATGTTATCTGTATTTCTTCTTAATTTAGCCATTTTAAAAAGTGTACAGTGGTGTCTCT  
TTGCGGGCTTGATTTGAATTTCTCTAACGGAAAATCCTGTTGAGATCCTGTTTATATGCTTCAGT  
GTCAT

>hg19\_ct\_UserTrack\_3545\_772 range=chr9:75815981-75884380 5'pad=0  
3'pad=0 strand=+ repeatMasking=none\_153  
GATTCTCTCCCTAGTAGTGTCTTGAACATTTGATTTTTATTTGCTTTCTCTCTTGAATCATG  
GTTTTCCCGGAATTATTCTAGTTTTTAACAGCTAAAACTAATAAGAAATTGCAACTAAGTGGCA  
GCCTACTGGCATATTTTTTCCAGTTGGTAGAATTGTGGCTAGTGCTAAAACAAAGAAGCAAGCGA  
TTCTC



TCATAGTAAATTTGGTGTGTAGAAAAGCTTATATACCCACATAGATGAAGGCATTTTATAATATA  
TAGTATGACTATGACTATGAGGACTTAAGGATATGCCTAAAAGGAAAATTAAGTCTGCAACTATT  
TAAGTTACATCTCTATTCTCAAATTTATTTAGAGTAAGAATAAAGTACCACCTCTTATAGTCAA  
ATAAT

>hg19\_ct\_UserTrack\_3545\_1724 range=chrX:130812120-130902719 5'pad=0  
3'pad=0 strand=+ repeatMasking=none\_287  
AGACTTTATGGGCTGTGTGTGGTTGTGTTTGTGTGTGTCTCTGAGAGTTTTATAATGTCTTTT  
GTATAAGAATTAAGTAAATTAAGAATAATGCTTGACAAAGATTAAGAAAAATCCATGTATT  
AATAATGAAGAAAACCACTACCATACAACCTAGTCAAGGCAACTTAAGAACTTTTGGATTATTTC  
AGGAA

>hg19\_ct\_UserTrack\_3545\_1080 range=chr9:111524580-111535979 5'pad=0  
3'pad=0 strand=+ repeatMasking=none\_12  
TATAATACATATAACATACAAAATATGTGCTGACGGTTTATACTGCCAGGAAGGCTTCCAGTCAA  
CAGTAGGCTACTGGCAGTTAAATTTGGGGAGAGTCAAAAAGTTGTACATGGATTTTCGACTACACG  
GGAGACAGCACCCCTAAATCCCATGTGTTCAAGGATCAACTGTAATACCTTTATGCCACTCTAG  
ATCTG

>hg19\_ct\_UserTrack\_3545\_1849 range=chr2:202423756-202483755 5'pad=0  
3'pad=0 strand=+ repeatMasking=none\_89  
GAGAGGGGTTACTTAAACATAATTCTATATGATAAGCTGAGTCCCGATAGGACTGAGTACTTCTC  
GCATCTCTCAGGGATGGCTGGATCTTTTAAACCACGTTAACCTTTGGTATCCCTGCTCAATATCT  
ATAGTCATCTCTGCTGTAATGAGTAGGTCCACAATTTTCCAGAACTTTTTGAGTGCCAAAATGA  
CACAG

>hg19\_ct\_UserTrack\_3545\_47 range=chrX:87868745-88604944 5'pad=0  
3'pad=0 strand=+ repeatMasking=none\_2314  
ATCCTTTAATATTACATGAAAATCTTGTTCAGAGAGAAAAGCCAAATTTTCATCCTTGCATTATTG  
TACTATTAATGTCAACCCCAATCTTTAATAAAACCTTATAGGCAAATCCATCAATCTTAATCAGT  
TTGACCATGAGGTGAAATTTTAAATAAACCTTTTTATAACCCTTTACAAGTTTTTGTAAAGAGCAGA  
TCAGT

>hg19\_ct\_UserTrack\_3545\_16 range=chr16:62795100-63031699 5'pad=0  
3'pad=0 strand=+ repeatMasking=none\_483  
ACATTTATTCATGTGCCTATATTTTATTAATGTCCCTCACCTTCATTAGGGTGTTCATGTGGAC  
AGAAACTGTATCTTTGTTTTTGTCCCATTGTATTTCCAGAGCCAAGAAAAGGACCAGGCAAGTA  
GTGAGATTTGACTGACAGGTTTAAATAGATGGACAAATAAAGGAAGCATATGATTTTCAACAGAC  
GATAA

>hg19\_ct\_UserTrack\_3545\_290 range=chr8:111381825-111667824 5'pad=0  
3'pad=0 strand=+ repeatMasking=none\_1152  
TGCATATGTTTATGAATATGTTTATGAATGTAAAATTCAAAAACATAGTTGAATATATACAAATG  
AAATACACATATGTATATATGTGTATTTACATATATACATATACACACATATACATATATACAT  
ATATACATACATATACACATATATAAACATACATATACACATACATATTACACGTATGTATATAT  
GTGTA

>hg19\_ct\_UserTrack\_3545\_1176 range=chr7:90104865-90121464 5'pad=0  
3'pad=0 strand=+ repeatMasking=none\_58  
TTGGATGCATGGGTCTGACAAAGGAGATCTCAATAAGTTACCAAAGGCATCTACTACAAATAATA  
ATAATAATGGTTATTATTTATTGAATACTTATTGAGTTAATACTAAAACCTTCTGGGATTGTGG

TTATTATACTTGGACACCACTTTTATTTTTCTCTTTCCAAATATAGTGTGTTTGGTGTAGTGAAG  
AAAAA

>hg19\_ct\_UserTrack\_3545\_8 range=chr10:9973395-10664994 5'pad=0  
3'pad=0 strand=+ repeatMasking=none\_1139  
TGACCCAATTATGAGTAACCAATAGCCCATGATACAGACACAGGATGCTGTGAACATGTGTCCCA  
GATGGTCGGGCACATGTTTACAGCTATGAATGTATAAATGTATAAAGCTTTGGTTTATACATTTT  
AGGGGGATTCAAGACATCAACCAACACATGTAAGATGTACTTGGGTTTCAGTCTGGAAAGGTGGGA  
CAATT

>hg19\_ct\_UserTrack\_3545\_2 range=chr7:108829165-109291564 5'pad=0  
3'pad=0 strand=+ repeatMasking=none\_54  
GTCATCAAATAATTTCTTGTGGGAATAGTTTACACAGATATTTTCATATAGAACTATTTGAAACA  
AAACCATAACATTTTTATCATATGTAAAGTAACAATAATTCCTTAGTATCATCAAATATGAGTAC  
TCATATTCCCCTGAATATCTTGTAAACAATTTGTATAATTTCTTTTAATTTGAATTCAAATAATA  
TTTAT

>hg19\_ct\_UserTrack\_3545\_989 range=chr3:90117311-90140710 5'pad=0  
3'pad=0 strand=+ repeatMasking=none\_46  
CTATAGATTGTTTTAATCTATTCATTATACTCAGGAAAACATTTATATATTTTTTTTTCTTTATCC  
TGTGTTAACTTGAGAAAATCATCACTTGCCACTTGCCACAGAAGCCATATGCTCATAACAACTT  
AGGCCACCAATATCTATAAAATAATTTTCAGGTTATTGCAAAAATCCTATCAGTGTGAGAAGTGGA  
TTCCA

>hg19\_ct\_UserTrack\_3545\_125 range=chr13:79553000-79630799 5'pad=0  
3'pad=0 strand=+ repeatMasking=none\_348  
AGTGCTAGGATGGTGATACTCACAGGGTCTGTGGGTGCATATACGACAAATCTTTAGGGAGACG  
ACACACAGCTGAGACTTAGAAGAGGGAGAGATAAAGGAGGGGAACACTCACCAATGAGTCTGGAG  
AAGCAGGCGAGCACACATCATAAAAGGCCTTTCACATCATGCCAAGGACTGAATCCTCTCTGCA  
CTTAG

>hg19\_ct\_UserTrack\_3545\_127 range=chr15:98298797-98442196 5'pad=0  
3'pad=0 strand=+ repeatMasking=none\_112  
TAGTCAGGAAGGTGAAAGATCTTTGCAATGACGATTACAAAACACTGCTCAAAGAAATCAGAGAT  
GACATAAACAAGGAGAAAAACATTCATGCTCATAGATAGTAGGAACAAATATTGTTAAAATGGC  
CATACTGTTCAAAGCAATTTACAGATTCATGCTATCCCTCTCAAACCTACCAATGGCATTCTTCA  
TGGA

>hg19\_ct\_UserTrack\_3545\_133 range=chr8:36265645-36392642 5'pad=0  
3'pad=0 strand=+ repeatMasking=none\_103  
TACCGCAGTCGACATCGCCCTCTAACATCTGGCTCTTCACTATATTTTAACTTCATTATCTGACA  
CACAATCTCACTCTCTTTGTCCCAGTCACACAGGAATTTTGTAGTTTCTTGAATATGTCTGTTT  
TTTCACTTTCTGTTCTATTTTCCCTATGGTTTCCCTTCAGCTATCTACATCCATACGGATCACTTC  
CTCCT

>hg19\_ct\_UserTrack\_3545\_3 range=chr4:33402806-33637605 5'pad=0  
3'pad=0 strand=+ repeatMasking=none\_62  
AAATTCAGCTATTCAATTCCTCAAGGCACAGGGACTATAGTAAAGAGGCGGGTGTGTAACATG  
GTAAGGGCCAATTTTGAAGATAAAATAAGTTTGTATTTCCCTATAAATTAATCATTAATGTCAA  
GGCAAACCGATGCAAGGCCAGCATATGGGCCTCTGTGTTAGATTAACAAGGTTTTTCTTAAAGTAT  
TAACT

>hg19\_ct\_UserTrack\_3545\_22 range=chr13:68878800-69367599 5'pad=0  
3'pad=0 strand=+ repeatMasking=none\_2080  
ATATTATACAATTTTTTTGATATTTCCCTCTTATACTTTAAAACCTAAATAGTATATATGTTCCAT  
TTGAGCTATATAATTTGAAAGAATAATTCCATTTTTTAAAATAAGACTATTCTAATACCACCTAAT  
AAAAAGTCCATCTTTCCTTTTTGACTTGTTTTTGAATGAACTTTATAAATAGCTACGGCAGCTT  
CATAA

>hg19\_ct\_UserTrack\_3545\_171 range=chr1:99732213-99791812 5'pad=0  
3'pad=0 strand=+ repeatMasking=none\_146  
AGACAGCCAAATGAACAATTTCATAAAGCTATGCTAGAGGGAAGGATAAGATGCTAAGGGAGCCA  
CATAGACGGAGATGTGATTCAATTTAGGGTACAGTAAGAGGTTTCAAAGAAAACCTTACTGAGGGA  
AATCATGCCTAAATCATACTGAGTTCCTTCATTGATCTCACAGGTCCTAAAATCCTGCAGCAAAG  
TGCCA

>hg19\_ct\_UserTrack\_3545\_474 range=chr3:22605997-22661796 5'pad=0  
3'pad=0 strand=+ repeatMasking=none\_196  
TATTCACTAGAACAGTGTAGTAATCTCAAGTATCCTTCCCCAGCCCTCCTTATTTTTACCATTCCA  
TACCCTAACTATTTCTTCATCCTCCATTAGGATCTGCCCTTTGACACATCTAATGGATTGCTTC  
ATGTCCAAACATTTTTCTCATTCATCCTTGCATCACAATTCATGTTGTCTTCCTCATTCATTTGG  
ATTTT

>hg19\_ct\_UserTrack\_3545\_74 range=chr4:179197207-179501806 5'pad=0  
3'pad=0 strand=+ repeatMasking=none\_906  
TGATTTGCTTTTTGAGTCTGTTTCAATCAAGATGCCTCTTTCAGAAAAAATTGTCTACTTGGCTTT  
ATTAGAGTCAAGCTCTAAAACAAAGACCACCAGGCTTATGAAAACTAAGGGTGTATCTTATGGG  
TGTATATTTATCTCTAGAAATTCAGTTCTAAGGGAGAAGATTTTGTGACATTTTAAGACTATC  
TCAGA

>hg19\_ct\_UserTrack\_3545\_213 range=chr15:25454308-25513307 5'pad=0  
3'pad=0 strand=+ repeatMasking=none\_20  
GCGGGTTGGTGGCCATGGCCCATGCCAGTGGTTCACAGGGCAACCCTGGGATCATGCAGGGGAGC  
TGGTGAGGGCAGTGGAGGTGCTCTCCGGAACGGAAGTATGGCTCAGCCCAGGTATCTGGCCCAA  
CCCAATGACCAGCCTGCCTTGTTCAGGGTTTGGTGTATGGGGAGGGCCAAGGGTGCCTGCAT  
CTGTG

>hg19\_ct\_UserTrack\_3545\_846 range=chr6:63914842-63955841 5'pad=0  
3'pad=0 strand=+ repeatMasking=none\_33  
GCTCGGCGTCCGCCGCCCGCCATGGGAGTGCACGTGGAAACCATCTCCCCAGGAGACTGGCGCACC  
TTCCCGAAGCGCAGCCAGACCTGCGTGATGCACTACACCGGGATGCTTGAAGATGGAAAGAAATT  
TGATTCTCCCGGACAGAAACAAGCCCTTTAAGTTTATGCTAGGCAAGCAGGAGGTGATCCGAG  
GCTGG

>hg19\_ct\_UserTrack\_3545\_177 range=chr3:85625711-85946310 5'pad=0  
3'pad=0 strand=+ repeatMasking=none\_945  
CAATTCCTCTAATTCCTTTATATGGGTTCTAATATCAGAGATGCTCTTTATTTCTAACTCAGAT  
TTTAGCTATTCAATCACATTTTTAATTTTCCTTGCAATTTCTTTTTACTTCATACATTTTTATCAT  
GTATTTCTTATTTATTATTTTTACTTGATTTTTTCAATTTCTCTCCTCCTATTTTCATTGAGTCCAC  
CTATC

>hg19\_ct\_UserTrack\_3545\_197 range=chr1:106250478-106564677 5'pad=0  
3'pad=0 strand=+ repeatMasking=none\_233

AGTTAAAAAAGGCTCTAATAGTTTATTTGCTTGGTTAGGTGAAATATGGATTAAAAAGAGAGCCAC  
TGTGAGTGAGCTAGAAATGCCTTGGTTTCATGTAGAGGAATCATTTCATAATTCAGTTGTTAACAA  
ATACTACTATAGCTATTATAATTATCAATTTAATATAGGGAATTCATTTATTAATAAAATTGTTGG  
AGGGT

>hg19\_ct\_UserTrack\_3545\_132 range=chr18:58756221-58964620 5'pad=0  
3'pad=0 strand=+ repeatMasking=none\_18  
TGGTCCTGGTCCTTTACCATTTTGGAGTCACAGATTAGATTCTTAAGAATCTGACAAACCCACAG  
AATTCAATAATGTTTAAACAAGGCCACAGCAACAACAAGACCACAGCAGCAACAACAATTAAT  
GTAGTCTCAGGGGTTTCATCGGTCATAGGTTTAAACATCATGCTCTAGAGTTTATTGGCCATTAA  
ACACT

>hg19\_ct\_UserTrack\_3545\_99 range=chrX:3881001-4014000 5'pad=0  
3'pad=0 strand=+ repeatMasking=none\_545  
TTGGTGATTAAGATCTTGTGAAGAATGACGCAGCTGTTTGTAGGAAGAAGTGATACAATTGCAA  
CCATTGCTGGTGAAAATGTACATGCCACCATGCATGTACTAAAAATGTGGCTTTTTCTTGTGTG  
CTGGAAAATTACTATAAAAATTTAACATTTTAAAGTGTGTTTGCAACATCTTTGATACTTTAATTGC  
AACTT

>hg19\_ct\_UserTrack\_3545\_46 range=chr3:161278507-161569706 5'pad=0  
3'pad=0 strand=+ repeatMasking=none\_276  
GAAATAGAACCAGTAGAAGACTAATATTAGAAAATGTATGTCAAAGATTTGGCTCATGTGGTTGT  
GGAGGCTGGCTAGACACATCTTAAATCTGCAGGACAGGCAGTCAAGAAGAGCATGCTAGCAAGCT  
TGGACATTAGTTGAAGATACTATCCATAAGCAGAATTTTTTCTTCTTCAGGGGAAGCCTCATTTT  
TGTTT

>hg19\_ct\_UserTrack\_3545\_650 range=chr19:28733561-28780760 5'pad=0  
3'pad=0 strand=+ repeatMasking=none\_61  
TTCAAACAGAGAGAGTAAAATCTTCCTCATCAGAGTGCCCTGGAATGGAGGAGCCTGTGCACCCC  
TGGGCCAAGAACTAACACCCATCTGCCCATCCTTCTTTTACTACTAGCTCCACCCCAACCTAGGA  
GATGCTCCAAGTCTAAAGATGTCTTCATCATACTTCCTCCCATCCCAAGAGTCTCCTTTTCTC  
CAGAG

>hg19\_ct\_UserTrack\_3545\_89 range=chr15:61459909-61487308 5'pad=0  
3'pad=0 strand=+ repeatMasking=none\_69  
AATGTGACAATCTGGGATGCTTATGGGACGTCAAAGAGGGTTTGAATTCATGCTCTGAAATTAA  
TCAGACTTTGTTGCCACCTTTTCAGTGACATGCCCATCAGCAAAGAACAAGCATTGTCATTAGCA  
GAACAAAAGAAAAAAGTGTATGCCTAGGATTAGCTTTGGCAAAAAAAAAAAAAAAAAAAAAAAGG  
ATAAA

>hg19\_ct\_UserTrack\_3545\_75 range=chr5:18954444-19638843 5'pad=0  
3'pad=0 strand=+ repeatMasking=none\_3308  
CTGAAGGCATCTACTTGCTTCCAAGTTTCAGTGATTAGAAAGAAAAGTGCATAAACATCTACAT  
ATGGGTTTTTGTATAAACACAAAATTTTCAACTCATTTGGGTAAACACAAATAAGTGTGGTTTTCTG  
GATTGTATAATGAATTTATCTGAAATTGTGAACAGTGTGAAATAAGTTAGGGGAAAATGGCAA  
CATTT

>hg19\_ct\_UserTrack\_3545\_23 range=chr2:77310893-78182092 5'pad=0  
3'pad=0 strand=+ repeatMasking=none\_3069  
CATAGTCATATACCCACAGTAGAATCTGCACAAAATAATTTGGCTTTTTTAGAAACAGAGTTTA  
TAAAGCATTGCAAATTCAGAACCTATAGAATATACAATACCAAGAGTGAAGACTAATGTAATAA



>hg19\_ct\_UserTrack\_3545\_278 range=chr6:155851709-156063708 5'pad=0  
3'pad=0 strand=+ repeatMasking=none\_924  
TATTATGTGATTTAAAAAGGACTCAGAAAGGTAAGTGAGTTTAATTAATGTCATACAACTCGTAA  
GTGGCAACATATGGATATAAAAATGAAAAATTCCTAATTTGACAGTCATTGTCTTCCCTTTAGATT  
GCGCCACCTTCTTCTGTGGACAAATAGATTCCAATCTCCTGGCTTCTGGTTCTTTGTGGCACAC  
TTTAG

>hg19\_ct\_UserTrack\_3545\_344 range=chr1:247650778-247739777 5'pad=0  
3'pad=0 strand=+ repeatMasking=none\_422  
ATTTCTTGGAGGCTTTGTTTGTTCCTTTTCATTTTTTTTTCTCTAACATTGTCTTCATGCTTTAT  
TTCATTAAGTTGATCTTCTATGTCTGACATCCTTTCTTCTGCCCCGATCAATTTGGCTATTGATAC  
TTGTGTATGCTTCACGAAGTTTTTCGTGCTATGTTTTTCAGCTCCATCAGGTCATTTATGTTTTTC  
TCTAA

>hg19\_ct\_UserTrack\_3545\_166 range=chr7:88464865-88939064 5'pad=0  
3'pad=0 strand=+ repeatMasking=none\_1350  
CACTGACACCAACTGGGTAGGGGAAAACCTATCTCAACCCATGTTTGCCTCCACTCTCACACAACT  
ATAACCATCATCAACACAGAAAGACTTATGTAACCAAAGGTACGGGGCTTTCGTCTCACACAGCAA  
GCAACACACACGTGTTGGGTGTTCCCAATTCAGTTTTGTCAGTATTTACCTGGAAATAGTTTTCT  
GATCT

>hg19\_ct\_UserTrack\_3545\_64 range=chr5:10988401-11182800 5'pad=0  
3'pad=0 strand=+ repeatMasking=none\_75  
TAGTACTTACATTCACAAGCAAGACTACTTCGCTGGGGACCTATTTTTTCAGATGAAAGTCAAAC  
AGAAATCATTGCCTTAGGTAACCAGCTAAGACATTAATGCTCACGTATCAGAAGCCTGATTGTTT  
AAAATTGTACCAGTTTTCCAGTCATTTTTGAGTGGAAGAAACCTATTAATGTAATCACATTAAGC  
AGAGA

>hg19\_ct\_UserTrack\_3545\_371 range=chrX:94086745-94260744 5'pad=0  
3'pad=0 strand=+ repeatMasking=none\_762  
CCTAGGGTCTTGAGAGAACATAGGTGGCAGTCAGGTAGTGGATATATGCCTTAGGTGAGTTAGAT  
AGTGGTTATAGGCCTTGGGTAAGACCTAGTGCTGTGCTGGCTTCAGGTCTGACCCAGTGCAGTCC  
CAGTGGTGGTGGCCACAGGGGTCTTTGTATTACCACACCCCCAATTCAGGTGACTCAGCACAGA  
GAGAG

>hg19\_ct\_UserTrack\_3545\_32 range=chr12:99492470-100013669 5'pad=0  
3'pad=0 strand=+ repeatMasking=none\_2004  
AGTTAACTCCTTCATCAAGGGGAGGCAAGAATTAATTCCTCCACTTAAATGTAGGCAGGCT  
TTTACTACAATGGAAGTGATGTTGCCTTCTGATGTCTCATTTTCTTAGAATGTTTGTCTTAGAAT  
CCCAACACAGACCACGAGAAAAGTCCAAGTAGGCCATGGCAGCGATATGAGTATGGATCTTGAGAA  
TAAAA

>hg19\_ct\_UserTrack\_3545\_839 range=chr6:58288442-58296841 5'pad=0  
3'pad=0 strand=+ repeatMasking=none\_1  
CGTGAGCCATCGCAAATACAAATATTCATTAAACGTATAGGCTGTCTACTTACTCTATGACCTTT  
CTACCTAGACTAAAGCCAAAAAATCTGACACCCTAAAAGATTCATAAATTTACTACATAAG  
GTTTAGATGCATCATTACCAATATTGCACATAGAAATTTAATGTTGTTAGTTGAGCAAACAGATG  
CCATG

>hg19\_ct\_UserTrack\_3545\_715 range=chr5:50223244-50254643 5'pad=0  
3'pad=0 strand=+ repeatMasking=none\_131

GTCTCTCCTCTCCTCTCCCCTTCTCTTCTTTCTTTTTGAGTCAGGGTCTCGCTCTGTCACCCTG  
GCTGGAGTCCAGTGGCCTGATCATGTCTTACGTGCAACCCTGGTTGATCATGATCTTCTAAGAAT  
GGTCTTATTCAACTTTCTTTCCATTTTCCCATTCTCAAGCACACTAAGAAAAGGCTGTATTAC  
ATGGA

>hg19\_ct\_UserTrack\_3545\_36 range=chr15:26874508-27016307 5'pad=0  
3'pad=0 strand=+ repeatMasking=none\_697  
CACAAAACAAAATTTTCTTTGACAAGTATCAGGTCAACTAATTTTTAAAAAAAAGAATGTACGA  
AAAGAAACATTAAAAGATTTAGAAAAAATTGGAAATGCATAACTCCACTATCCATGAAGCAAGC  
TATGGCAAACCAATGCTAAATATTTAAAACATTCAAATCCCTTCCTAGATTGTTTCCACAAAACA  
CCAAA

>hg19\_ct\_UserTrack\_3545\_295 range=chr4:107820152-107954551 5'pad=0  
3'pad=0 strand=+ repeatMasking=none\_553  
GCTGGGAAGGGTAGAGCAAAGGAAAAATGAAATTTTATTTTCAGAATAAATTTATGAAATCATACT  
TCAACATGGGAACCTTGACAGCTGGGGGAGGGCAAAGGGACAGCAATATTTTTCAAGTAAGTCACTT  
TAATAAAATACACAAGCCCTCACTTTGACACAGCATTGGAAGGGACATTCTTGAACAAGTATCAA  
AGTGG

>hg19\_ct\_UserTrack\_3545\_34 range=chr21:21332130-21815929 5'pad=0  
3'pad=0 strand=+ repeatMasking=none\_555  
TTATTAAAATTTATGATCAATTACTGATTATTTTTAAGAATGTGGAAATAGAAGTTCATCCAAAG  
AAATACTCCACCAACAATACCAATAGTCATTTAGCCAATAGCTAAGGATTCTCTTATAACAAATA  
ATTTACAGGGACTCTTTACATTTGCAAAACTGACAATAGCTATCTTCTGTTAGTTTTTATATTA  
AGTTT

>hg19\_ct\_UserTrack\_3545\_181 range=chr1:103436413-103571812 5'pad=0  
3'pad=0 strand=+ repeatMasking=none\_520  
GTGTATTTTAAATTATAAAAATGAGCTAAAATCATACAAAAAATGTAGGCTCATTATTTAAGCAG  
CCAGTTAACAGATGACTACTTACTCGTTACCCAACAGTACTAGGTACCCAAAAGGACACAAGCAG  
CATAAAATGCACAGTAGAATTAGCTGTCTGTGCTGATAAGGAAGTGCCCATCCTTTGCTTCACTT  
TGTGT

>hg19\_ct\_UserTrack\_3545\_719 range=chr14:88930048-88958447 5'pad=0  
3'pad=0 strand=+ repeatMasking=none\_95  
CCTGCAGAGCTACCAAACAATACTGATGGGAAGGAGGAGGGAAAAACCTAGCATGCCAGGAGAG  
TTTCCAGAAGGTACAAAGGCTTGAATGTGATGGTGAGGGGATGTGGGGGTGCTGGGAGGCTCCCA  
GAGGGCCGCTTTAACAGAGTGGCAAAGACAGAGGAGTGGGCGGGTAACCAGCAAGCAGAAGCAGC  
ACACA

>hg19\_ct\_UserTrack\_3545\_478 range=chr6:18627022-18717221 5'pad=0  
3'pad=0 strand=+ repeatMasking=none\_433  
TTCAAGTGTTTGTATAAAAATATTAGATAATTAAGCAAAGATAGATATGGAACATAGGAACTTTG  
TCTGCAGAGAGGGGAGACACGAGGAGAAAGGGGGTAGAAGACGGAAAATGGAGGAGAAAAAGGAG  
GGGAAATGTCAAGGGAAGAGGAGCAAGCAAAGCTGTTTGTAGAGAGTGGGGACCAAGACAGATGTG  
ACCCC

>hg19\_ct\_UserTrack\_3545\_286 range=chr7:153846668-153937067 5'pad=0  
3'pad=0 strand=+ repeatMasking=none\_105  
TTATTATCCTCCGAATCTGCCTGGGGTTTTGATAGAACCTGGCTGCCAACGGCTTGCCCTGGCCT  
TTCTGAAACCTCACCATTTCCACAATGAAACAGGACGCAAGGACTGTGCCCTGGTATGGGAAGG

GAAGGAGGAGAAGCTTGCCTTTACAAGTGAGATATCCACAGACAGGGAACATACTACATTTTTTTT  
CTTCT

>hg19\_ct\_UserTrack\_3545\_2041 range=chr2:226535357-226600156 5'pad=0  
3'pad=0 strand=+ repeatMasking=none\_90  
AACTTGTTCTGATCTCACATATAATAAGTGATAAAAACCACATCATCTTATCCATTTTATTCATC  
TTATACTGTCTCCTCAGAAAATAGAAAATCAACTTTTTTTTGTCTGTCTATTTTTGAGATGGAGT  
CTTGCTCTGACACCCAGGGTGGAGTGCAGTGGCAGATCTTGGCTCATTGCAACCTCTGCCTCCT  
GGGCT

>hg19\_ct\_UserTrack\_3545\_941 range=chr6:80694882-80713081 5'pad=0  
3'pad=0 strand=+ repeatMasking=none\_63  
AGCAGTTTTTAGATTTTATTTTACATTGAAAATCAGTCAGATTTGCTTCAGCCTCAAAAAGCAT  
GTTTATGTAAAATTAATGAGTGATGGCAGGCAACTGTAGTTTTTTTTTCTAAATGGGAAAAGGG  
TTAAAGATGTCACCTCATTGTTGCCAGCTTACATTGTTTCTGGCAAGAAGTCTACTGTTCTTAT  
GATTG

>hg19\_ct\_UserTrack\_3545\_1286 range=chr3:131226511-131245310 5'pad=0  
3'pad=0 strand=+ repeatMasking=none\_81  
TCCTGGGCAACACTAGAGAAATTATTTTCAGAGCTTGAAGCCATATTTACTTTTTAGGAAAAGCA  
TTTTTTGTTCCATCAACAAGGCTGGAGTTTTAGAAATCCTGCTATGTTCTCAGGAGTCACAAACAG  
GAATGGAATGGCAGCCTGATGCACCTTTATGAATTTACACTGGGGTTTTAAAATTAGAAAACACT  
GTACA

>hg19\_ct\_UserTrack\_3545\_223 range=chr9:113871580-114061579 5'pad=0  
3'pad=0 strand=+ repeatMasking=none\_458  
ATCATGAGTGAACCTCCCATTCACAATTGCTTCAAAGAGAAATAAAATACCTAGCAATCCAACCTTAC  
AAGGGATGTGAAGGACCTCTTCAAGGAGAACTACAAACCACTGCTCAAGGAAATAAAAAGAGGATA  
CAAACAAATGGAAGAACATTCCATGCTCATGGGTAGGAAGAATCAATATCGTGAAAATGGCCATA  
CTGCC

>hg19\_ct\_UserTrack\_3545\_1846 range=chr4:182064807-182160206 5'pad=0  
3'pad=0 strand=+ repeatMasking=none\_416  
CAGGTCTGTTACACAGAATAGATTGTACAGGTGCAGTTTGGCCAATTATTGTAACCTGTTTTCTTC  
AGAGTCTTTTCTGCTTTACTCATCAAGCTCACTAGGAAACAGTCATTCCTTTTTTCACTGTTTCTT  
TTATACCAGGCTTCCATATATTACCTTGAATCCTAAATACGTTCCAAGGCTCCCCCATGTCC  
AGCTG

>hg19\_ct\_UserTrack\_3545\_34 range=chr16:10008900-10125299 5'pad=0  
3'pad=0 strand=+ repeatMasking=none\_55  
GCCACTGCACACCCACCAGAGCAAATATTTTCTTCCAACCTTAAAATAACATCTACAAATTAAT  
TCAGTCTGTCAAGGGGAACTCTCCTTGGGTAATTCAGGAAGTTTTTGCCTTTGGGTAAGGCACTC  
TAGGCACAAACAACCTCAAATTCACCTGTAAGTTGAACCAAGAAGGAGGTTTATGATCTACAGC  
TACAT

>hg19\_ct\_UserTrack\_3545\_7 range=chr16:9391700-9678099 5'pad=0  
3'pad=0 strand=+ repeatMasking=none\_92  
TTAGCCTCTTTTATAAGGACACTAATCTCATTTCATGAGGACTCCACCCTCATGATGTAATCACCA  
CCCACCTCCAGATAACCTCCCACTAAGACTTAGGTTTTAAAATATGAATTTTGGTGTGACACAGA  
AATTTAGTCCATTGCAGGGAGCACCTTGAGCTGTAGAACAACCTTGATGGCTATAGAAGAGGCTTT  
TCTGT

>hg19\_ct\_UserTrack\_3545\_605 range=chr5:36379044-36398243 5'pad=0  
3'pad=0 strand=+ repeatMasking=none\_24  
TCTCTGAATTCACATTTAAGTGGGCATTGTGTCTTTATCTGGCAACCTTTTCTATGGGTGCTGCC  
ACAACCTCCTCCGGGGACCACTGTTTCCCTAAGGAACTGCCCCACAGGTGGCCTGGAGACCTCA  
AAATGCCACAGCACCAGGATGTTCAATGAGAAGGTTGCCCTGAACACCTCTCTTCCCCTTTTGT  
TTACT

>hg19\_ct\_UserTrack\_3545\_27 range=chr3:84287111-85007510 5'pad=0  
3'pad=0 strand=+ repeatMasking=none\_2919  
TTCTTGCCCACTGCACAGAATTACCCAATACGCAGAGACAGCAGGTGTTTGCAGTAAAGAAAGAG  
TTTAATAATTACAGATTCAGCTAAATGAGAACATGGGAGATAGTTCTCAATTCTGCCTTCCTAAG  
AATTCAGAAGTTAAAGTTTTTTTTTTTAGGGATATTTTGACAGGCTAGGGAATGGGGAATGCTGAC  
TGGTT

>hg19\_ct\_UserTrack\_3545\_64 range=chr9:10856201-11319400 5'pad=0  
3'pad=0 strand=+ repeatMasking=none\_1881  
TATGTTTGGGATTTTAATTATCTACTAGGTGTAAAGCCTAGGACCTAGACAGAAGTGCAGATAAG  
GTTTGACTTATTCCAATATTAACCTCCATGTTTCCCTAGGTGTTACCTAGCTGCAAAGCAGGCAAAT  
TGTACAGCTAAGAGTTAAAGTGGCATTTTATAAAGCATTCAGGAGCCTAATCACTTTTAAATTGT  
ATAAA

>hg19\_ct\_UserTrack\_3545\_323 range=chr8:127751419-127822018 5'pad=0  
3'pad=0 strand=+ repeatMasking=none\_191  
ACATCCTCTCCAGCACCTGTTGTTTCCTGACGTTTTAATGATTGCCATTCTAACTGGTGTGAGAT  
GGTATCTCATTGTGGTTTTGATTTGCATTTCTCTGATGGCCAGTGATGATGAGCAGCCATAAAAA  
ATGATGAGTTTCATGTCCTTTGTAGGGACATGGATGAAATTGGAAATCATCATTCTCAGTAACTA  
TCGCA

>hg19\_ct\_UserTrack\_3545\_785 range=chr3:59244761-59294360 5'pad=0  
3'pad=0 strand=+ repeatMasking=none\_143  
ACTCTTCATTCTTTCTCCTTCCCATGCCCAACCCTGCTCCTCTTCTAGCCTTTCTCCCCTCAAC  
AAAGGGTAACCTATCCACCCATTCATTGTTCAAGTCAGTAACTAGATGTCATCCTTAATTCCACT  
TTCTACCCCATTTGTCCTCCCTACCCTCCTTTCCAATCCAGAAGTCTGTCAGCTCTGTCTCCAAA  
TACTT

>hg19\_ct\_UserTrack\_3545\_77 range=chr2:16643320-16668919 5'pad=0  
3'pad=0 strand=+ repeatMasking=none\_59  
TGCTGTGACAAGAGAGGGCAGAGTTTTGTGATATTGCTTTTGAAGACAATGTCATCAAGATACAA  
AAGCCATGGGAATAGTGTGTATGGTGTGTGTATAACAAGGAAATGGGAAATGGTGTGGGATGTG  
AACACAAGTGTGTGTTTGTAAAGGGGTGGAAGGAGGGAGAGAAAATGAAAACCATCACGTAGGG  
AGTGC

>hg19\_ct\_UserTrack\_3545\_694 range=chr13:98227600-98241199 5'pad=0  
3'pad=0 strand=+ repeatMasking=none\_25  
AATGTCAGTCTATCTCAGATTCTCCCTACCTCCTTATTCTTTGATTTTTCTCCATAATACTTATC  
TGATATGCTGTATATTTTATTTCTATTTCCCTCAATAGAGTGGCAGCTCCCTGAGACCAGGGACT  
TTGGCTCTTTTATTCAGTCTCCATCCCCAGCACCTTGAATGGTGTCCGGCACATGTTAGACAGG  
GGGAC

>hg19\_ct\_UserTrack\_3545\_148 range=chr7:74573665-74591264 5'pad=0  
3'pad=0 strand=+ repeatMasking=none\_10

CACATCCAGCTATTTTTAAATTTTTTTGTAGAGACAGAGGTCTCCCTACATTGCCCAGGTTGGT  
CTTGAACCTGTAGCCTTGAGTGATCCTCCCACCTCAGCTTCCCAAAGTGTTGGGATTACAGGCAT  
GAGACACTGCACCTGACTGCAAGAAAGCTTTAAAAGATAAAAGGAATGATAAAAAGAAAGTAATCT  
TTTTT

>hg19\_ct\_UserTrack\_3545\_203 range=chr11:88720553-88830952 5'pad=0  
3'pad=0 strand=+ repeatMasking=none\_416  
CATAGCCTGGGACATAAAGTCCACTTTTTTAAGATACTTGAAAATTTGAAAACACTTTCTAGTCT  
AGTAGAGCTCATCTCTTTGTAAATATATTTAAATTATAAGACCAGGTCTTGTAGTAATCTTCAT  
CAATACTTTTGGAAAAGATAGTAAAATTTTCACTTACAATAAAAAATAGGTTAAGTAAAATGGC  
AGCAG

>hg19\_ct\_UserTrack\_3545\_915 range=chr8:70855247-70858246 5'pad=0  
3'pad=0 strand=+ repeatMasking=none\_6  
GCAGACATACTGTCAACATATGGGACTGTAGTTACTATTACAATCATGCCTCCTTTTATCTTTGA  
ACTTTTTTTTTTTTTTTTGTAGGCAGAGTCCCCTCTGTCACCCAGGCTAGAGTGCAATGCTGCAA  
TCTCGGCTCACTGCAACCTCTGCCTCCCAGGTTCAAGCGATTCTTCTGCCTCAGCCCCCAAGTA  
GCTGA

>hg19\_ct\_UserTrack\_3545\_145 range=chr18:63533821-63698820 5'pad=0  
3'pad=0 strand=+ repeatMasking=none\_694  
TTTACAGAAAGCTGATTGGCCCATTTTGACAGGGTGTGATTGGTGCATTTACAATCCCTTAGCT  
AGACATAAAGGTTCTCCAAGTCCCACCAGTTTAGCTAGATAAAGAGTGCTGATTGGTGCATTTA  
CAAACCTTGAGCTACACACAAGGTGCTGATTGGTGTGTTTACAAACCCTGAGCTAGACACAGAGT  
GCTGA

>hg19\_ct\_UserTrack\_3545\_174 range=chr5:75182445-75312044 5'pad=0  
3'pad=0 strand=+ repeatMasking=none\_383  
TTTCATTGTACTGCACTGCTAGGCTAGCCCCACCATTTCTTTGTCCTGTATGCTTCTTTTATTTG  
GTTTTACCTCCATTTTGCTTGAGTACACTCACAACGAATTCCTTAGAAAGAGTGATGGGAGGTT  
AATATTATAAGACTCTGCATATCTAAACATGTATTCTGGCCTCCCTTATGATTCTGTTTGTCT  
TGTAT

>hg19\_ct\_UserTrack\_3545\_163 range=chrX:27638480-27701879 5'pad=0  
3'pad=0 strand=+ repeatMasking=none\_231  
AACTCAGAAAAACCTGCCTGTAACACAGCATATTTGTTTTTCAATATTATTTTGTAGAATGTGCT  
ATATAAGCAATTGAAAGATTATAATTTTTTTGAATTCTGGTTTGAAAGATAATTTGTTTTCTAT  
GCTTCTGTGATGTAAGGCAAAAACCTGGACAATTTGTAACAGAATTGTTTTTCATCATGTGCCAT  
CTTTT

>hg19\_ct\_UserTrack\_3545\_47 range=chr3:163487507-164524706 5'pad=0  
3'pad=0 strand=+ repeatMasking=none\_2874  
TTTACTGAGCCTAATGGGTGTCAGGGTCTAGTCTAAGTGAAAGAAAGGAGGGGCTAGGATGAAGGG  
TGAAAAGGAATAATAAAGACAGCATGTTTGTAGATCTAGAACAGAATAATGGGTTGTAGAGGGAGG  
TATTGAGGATAGGAGAGTATATGGGTTTGGCACCATGGGGTGGATAGGCAAAACAATTTGGTTGA  
TAAGG

>hg19\_ct\_UserTrack\_3545\_635 range=chr16:62229100-62247699 5'pad=0  
3'pad=0 strand=+ repeatMasking=none\_69  
TTGTGTTTTTATCTTTGAGGAATCGCCACACTGTCTTCTACAATGGTTGAATGAATTTACATTCC  
CACTAACAGTGTATGTGTTTGTCTTCTGTCAGCCTTGCCAGCATCCGTTATTTTTTTTTTTTGA

ATAGCCGTTCTGACTGCTGTGAGATGGTATCTCATTGTGGTTTTGAGTTGCATTTCCCTTAATAAT  
CAGTG

>hg19\_ct\_UserTrack\_3545\_1309 range=chr4:103061778-103102977 5'pad=0  
3'pad=0 strand=+ repeatMasking=none\_47  
AGCTGCTCAGTAGGAAAAGGGTATTCGTTTTACAATTGAAGGCTTAGAAAGAATACAACACACTT  
ACCAATGAAAATATAACACATATAACTAGTCATGAGAAGATATGAAATAGAGACATGTTCTTGGC  
TCGAAAACCAAACAACGTAAGTGCCTGACTCATAGTAGGTGCTTAATAACATTTGTATTGAGTG  
AATCC

>hg19\_ct\_UserTrack\_3545\_29 range=chr13:86910400-87219399 5'pad=0  
3'pad=0 strand=+ repeatMasking=none\_1366  
TTACTATTTGAGATAATGGATATGTTTCATTGGATTGATGTGATTATTTGGCACTGTGCTCATAAA  
TCATAACATCACTTGTACCCCATAAATATATATAACTTTAATTTATTGATTTACCATTAAACTA  
AAAATTAAAGAGAATTATAAAAAGGAAATTTTATGCATAGGAATTTTTTGTCAATCCAGTATGAG  
GAAAA

>hg19\_ct\_UserTrack\_3545\_102 range=chrX:5031601-5186400 5'pad=0  
3'pad=0 strand=+ repeatMasking=none\_347  
AGGATCGGGAAAATAACTATTGGGTGCTAGGCTTAATACCTAGGTAATGAAATAATCTATACAT  
CGAACTCCCATGACACAAGTTTACCTATGTAACAAACCAGCACATGCATCCCTGAACTTAAAAGT  
TAAAAAAAAAAAAAGTATAACTGAAGAAGACTATGAGAATCTTGGAAAGTCCCAGAAGGAAATATT  
AAAGA

>hg19\_ct\_UserTrack\_3545\_222 range=chr10:129362611-129492810 5'pad=0  
3'pad=0 strand=+ repeatMasking=none\_288  
TGTAGCCATTTGAATTTTATCTGGGTAACGAAAATTTGCAAAGCAAATTAATAATGTAATAAG  
ATTAGAGAGGGAATGTTTAAAGTACTCAAGAGAACAAAGTGTTCATGCATTCATTTACATAAA  
AAATGGATAGGCAAATTAATAATCTTCTCATTATTAGAGCCACTTATTGCACATATTTATTTAT  
TGCTT

>hg19\_ct\_UserTrack\_3545\_84 range=chr10:37319795-37415994 5'pad=0  
3'pad=0 strand=+ repeatMasking=none\_303  
TTGGATTCATATATGTAGTTGTTTTGATGAAGGAAAATAAATTTACATCGTTTTAGGAAAAAAT  
AGATTCGTTAAATGTCCTTTGTGCAGCTATAAGAACCAATGAAGTAATATTTAAGCTACATTACC  
TCAGGAGAAGGTGTTGACCATGTCCTGAACAATCCATTTTATAGTTGGGAAATATTACCAGCATG  
TATGT

>hg19\_ct\_UserTrack\_3545\_492 range=chr13:53775600-53824399 5'pad=0  
3'pad=0 strand=+ repeatMasking=none\_152  
TTTTATGTTAGTGGGGCTTATGTATTTCAACAAACCAGTCAAGTCTTCTCTTAAGAGTGAATA  
AATACAGTATTTTTCTCCCCATGAATCATTAAACCCATACATATCCATGTTTTATTTCTACTC  
CTTAAAGGCTCTACCTGTTTATTTAATTCAGAGCTTCTTGGAGATGATGCACCTTAGAAGCACCA  
ATCTT

>hg19\_ct\_UserTrack\_3545\_113 range=chr7:52986107-53254906 5'pad=0  
3'pad=0 strand=+ repeatMasking=none\_288  
ATTACAAAACCTACAGCTTACCTTATTCTCAAGAAATATTGAAACATTTTTCTGTAAGCAAGAA  
AAAGATAAGGATACCATTATTGAAATTAATATATATATTTTGGATATCTCAACAAATTAGGAACA  
AAGGGGAATTTCTAGACTTGGTAAAAAATTACAAAAACCATACAGCTAACACTGCAATGCTGA  
GAAAC

>hg19\_ct\_UserTrack\_3545\_1790 range=chr4:171181226-171295825 5'pad=0  
3'pad=0 strand=+ repeatMasking=none\_157  
CTACAATTTACTAAAAGCTATTATTATTGTGTGTAGCAGTATTTCTTCAAGAGTTGAAATGAT  
AGCTGGCTTTAGTATAGAAAGCCTGATAAAACTGTTATAAATCACTAGTGGTTTTGGGAAAGAAGA  
CTAGATTCTTATCACTTATGATTTCTACAGTTTCTCAGAGAATTGCTTAGGACTTTTGAGTCTCT  
TTCTG

>hg19\_ct\_UserTrack\_3545\_1530 range=chr6:158635613-158641812 5'pad=0  
3'pad=0 strand=+ repeatMasking=none\_21  
AATAAGACAATTTTTATGTGAATTCCTAATTTATCCATCCATTCATCCATTCATCTGTTAA  
TTTGTATTATTTACCATCCATTCAATTATTCATCACATACTCACTACCTGCTGCTGGGCTCGGCAT  
GGGAATAGGGAAAAACAGTAAACATGAACTTGCTCTTTTTTCTCCTAAGGCCAAAATGTTCC  
TGATG

>hg19\_ct\_UserTrack\_3545\_306 range=chrX:76140007-76380809 5'pad=0  
3'pad=0 strand=+ repeatMasking=none\_1033  
TTCTAGGACATCCCTGAAGGGCAGCAGTGAAGGGACATCTTCCCAGTGGGCAGAACTTCGAGCAG  
TGTACCTGGTTGTGCACTTTGCATGGAAGCAGAAATGGCCAGATGTGCTATTATATATTGATTCA  
CGGGCTGTAGCCAATGGTTTTGGCTGGTTGATAAGGGACTTGGAGGAAGCATGATTGGAAAATCGG  
TGACA

>hg19\_ct\_UserTrack\_3545\_449 range=chr11:16692025-16759024 5'pad=0  
3'pad=0 strand=+ repeatMasking=none\_162  
GAAGAACTACCTAAAATATATATACATATATATAATTATTCATATATATATATAAAAATCCTTCA  
TATGTATATATATATAAATTCTTCCCACACATATCTTTAAGGAATACATTTGCCTTGAACATTT  
AGCAAATGAATAAATGAATAAAAACAATTATTGTAAGATGACAAATGGTAGGAAATTTGAACTTAC  
TACAG

>hg19\_ct\_UserTrack\_3545\_231 range=chr10:132366211-132858410 5'pad=0  
3'pad=0 strand=+ repeatMasking=none\_741  
TGGCCAACCTGTGGGCTTGTCTTAGACACTCCAGGTCCTGAGGCACTCAGGAAAGGACAGTGGT  
GTGTCCCCAATGTGGACTTGGTGCTTCTGTGTGGGCTTGATGCTGATGTACAAGTAAGGATTGC  
TGTTCCTGTCCCCAAGGGCCTGCCAGCAGCTGGACACCATCTTTCACGAAGTGTTCCTGTGGG  
CAGCA

>hg19\_ct\_UserTrack\_3545\_287 range=chr4:105416952-105613551 5'pad=0  
3'pad=0 strand=+ repeatMasking=none\_264  
ATTGCAAGTACCCTAAACGTAGCTTATTGCCTTCCTTTCTGTTTCCTGACTTCTCTGGGTCGTT  
TCATTCGCACCTTTCTTTAAGCCATCTGGGATCCTCTGTACAACCGAGCTTTAATGCTGGACAC  
CTGGTCTGACAATGTTTGCTTCTCTTTTCACCTGCCAGCCCTTTGTTCTCCCCAAGATTGAAT  
GAGCC

>hg19\_ct\_UserTrack\_3545\_1074 range=chr19:53239189-53251588 5'pad=0  
3'pad=0 strand=+ repeatMasking=none\_39  
CCCAGCTACTTGGGAAGCTGAGGCAGGAGAATCACCTGAATGCAGGAGGCAGAGGTTGGAGTGAG  
TCAAGATCCTGCCATTGCACTCCAGCCTGGGCCACAGAGCAAGACTTCATCTCAAAAAGAAAAAA  
GAACCTCAAAGATCGCAACCATTTGTGCCTCACTTATCTGTGACCTGGAAGCCCCCTCCCTGCT  
TCAAG

>hg19\_ct\_UserTrack\_3545\_57 range=chr19:22328361-22728560 5'pad=0  
3'pad=0 strand=+ repeatMasking=none\_1464

TATTACAAAGATGCAATTGTAGGGGATTAATGAACAGGCTGCTTGGTTGAAATGAGATCATTAT  
CTAGCTAATTATTTAATCTATTGAATTTTAGTTGGTTGTTTCATGGGGACCCTGGCTAAGAAGCAT  
GGTTTCAACATTTTTTTTTTTTTTTTTTCTGAGACAAAGTCGCACTCTGTAGTCCAGGCTGGAGTGC  
AGTGG

>hg19\_ct\_UserTrack\_3545\_13 range=chr5:23978444-24504443 5'pad=0  
3'pad=0 strand=+ repeatMasking=none\_2041  
GATCTCCACAATTGTACAAAAGTAATGCAAACCTATTTCTCAAATTTTGAATAAACCTCCCAAT  
GAAATAGAGATCCATGTGTCTATCATTCCCTAGTTCCCTCAAACCTTAAATGAAATCACTTTAAC  
TGCCCTCACTTTAAATTGGAAATCTTTTAAATGTCTGTAGAGTCTATACACCCAATAACTGACATAT  
CAGCA

>hg19\_ct\_UserTrack\_3545\_61 range=chr3:3238201-3381000 5'pad=0  
3'pad=0 strand=+ repeatMasking=none\_191  
GGAAAGACTGGCCTAGTACCTTGTCTACATGTTTCCCTTACAAGGTTCCCTGACCTGTGGTAAGTA  
AAGAATGCCATTTTTTGTATAGGCCCGAGAACATCAAGATATTTGGGGAACCAAGAAGTGGGGAA  
CTCACCCAGTTCATGCAGGTATTGCATGGTGAATCTTTGGCTTGACTTTCTAGTCTCAAGGCTTT  
TAAAA

>hg19\_ct\_UserTrack\_3545\_123 range=chr8:33857459-34313458 5'pad=0  
3'pad=0 strand=+ repeatMasking=none\_527  
TTCTTTCTTTAAAATACTCACTGAATTATACTATTACCATGTTTCTGTTATTCCAGATTGAATTC  
CTTTCTTATAATTCTTAAACGAAGACTCCTGTCTAATCTCTCTGCTTTTCAAGTCCCTCAGTCAGAA  
TCTACTGTAGAGAGAACTGATGTATCAGACTTCCCCACTTTCCACTTTAATCATGCCACTGCCTT  
TTCTT

>hg19\_ct\_UserTrack\_3545\_25 range=chr16:6734400-6974999 5'pad=0  
3'pad=0 strand=+ repeatMasking=none\_121  
AACACCTTTTAAAGCCAACAGCTGAGCGATTTGCTATGACAAATCTGCCACTATGCATTCACTTAA  
TTTCCAATTAATCAAACATTCAATAAATCATTAGTATAAATTACACCTGTTCCCTTCTTGCCCTAG  
CCCATTAGCTCAACTCAGGCGTCCCTTCGACTGGCTGTGGGGAAGGTGTTCAATTTGTCTGCCCTG  
GCTGG

>hg19\_ct\_UserTrack\_3545\_1682 range=chr1:176918578-176923377 5'pad=0  
3'pad=0 strand=+ repeatMasking=none\_23  
AAAGCTCAGAGCAGGGAGGCTGAAGTCCTGCCAGCCAAGCCTGCTCCAATCCCCACTGCCATCTC  
CCATGGCTGCTCCCTCCAATGATGTCCCTGGCATAATCCTAGAAACCTGTGAAGATATCACCTCA  
CATGGCAAAGCGACTTTGCAGATGTGATTAATTAAGGATCTTGAAATGGAGACATTATCCTGG  
ATTAT

>hg19\_ct\_UserTrack\_3545\_1824 range=chr3:192490707-192507106 5'pad=0  
3'pad=0 strand=+ repeatMasking=none\_28  
ATCAACACAATGTGTTGGTAAGAATGTGAGACAACCTGAAATCTCATAATTTCATGGTGAAGTA  
TAAAGTGATACAACACTTTAGATACCTGGAATGATCTACTATCCTCCGAGTCAAAAAATCTATTT  
CTAGGTATATACCTAAAAGGAACAACCTGCATATGTCTAACAAAAAAGTGTGCGAAATGTGCATGT  
CAGCA

>hg19\_ct\_UserTrack\_3545\_21 range=chr8:51375448-51762047 5'pad=0  
3'pad=0 strand=+ repeatMasking=none\_510  
TGTGTATAGCAATCTTCTTCCAGCGTTAAGAAGGGAAAGTGGAAAATATACAACCTTTGGAGTGG  
CAAACCTAACAAACGCTACTGCAGCTGGGTGGTTAACGTCAACTGTGATGTCAAATTAATAATAT



>hg19\_ct\_UserTrack\_3545\_315 range=chr5:155550023-155696422 5'pad=0  
3'pad=0 strand=+ repeatMasking=none\_721  
TTCCACTGTGTCACATTTTCATCTTAAGTCTTCCTGTTGTTGAGACTGTGAAATTTACACTATTCT  
CATTCCAAGACTTCTCTTAAATCTCTTTATCAGTTGTTTTTATTTCTGGTAATGTAGTATTT  
CAAAGTTGTTTCCTGGTTCTGAAGGTTTCAGTTCCACCCTAATTATCCAAAAAGAAAAATGTTG  
AATTT

>hg19\_ct\_UserTrack\_3545\_35 range=chrX:65967276-66215075 5'pad=0  
3'pad=0 strand=+ repeatMasking=none\_674  
TTCCCCTACCCAGAGCTCCCCACATCATGAGACTGGAAGCAGTCTGCTTGGCAGGCAGAGTGGC  
TCAAGCAGATGGCAGCAATCTGATAGCATGCGGAGGATTCCAGATAAATTAGCTGATGAATGGAA  
AAGATGGTTGTTATCCTCATAAAGTGGGGAACTTTATGAGGAAAGAGGTGCTAATCTTCATCCC  
AGCTG

>hg19\_ct\_UserTrack\_3545\_58 range=chr4:136292751-136339550 5'pad=0  
3'pad=0 strand=+ repeatMasking=none\_108  
TGTATAATTATATTTAACCTGAAGCAAATGTTTAGACAATGTATTTATGCTGAGAGTAATATAAA  
ACATTTAGGACCTGAATTATATCTTAAATATTGGCTACTTTAAACAGTAGCCTTTCTTTATCTT  
ATCTCTTATAATACTGTTCAAGTACTCTTTATATTTTATTTGTTTGGCAATATTTTCGTATCATT  
TTGCT

>hg19\_ct\_UserTrack\_3545\_2132 range=chr2:235412462-235453461 5'pad=0  
3'pad=0 strand=+ repeatMasking=none\_202  
CAGGAATGTGAGGAGTCAGGGAGGTGTGTCTGGGGCAGAGGGCATGGCACGCAGGAAGGCAGGGA  
AGGATGGGCCCGCAGGGTTCAGGAACAGCAGCGGGGTGCAGACCAGAGAGTGCCCGGAAAGCACG  
AGGAATTTGCTTGAAACGTAATGGAAGCCCCTTTCTCTGTTTGCTCACCCCTCACCTTCCTGGAA  
GGTGC

>hg19\_ct\_UserTrack\_3545\_1056 range=chr7:75535865-75543264 5'pad=0  
3'pad=0 strand=+ repeatMasking=none\_3  
ATCTCCAGAGAGAGATTCTGCGCTTCTACACTTTGGTGATGTTCTCATCCCTGACCCTGTAGGGT  
TATCTCAACCCAGGAAATCTGCAAACCTCACTTGCTTGCACCCTCATGGACGCTCTCAAGGGGA  
ATAAACCATCCTGTCCAAAGGTCATGGTGTGATACTGGAGACACATGAGACACGGTGTGAGAGGC  
CGCTG

>hg19\_ct\_UserTrack\_3545\_455 range=chr14:57767448-57770447 5'pad=0  
3'pad=0 strand=+ repeatMasking=none\_7  
CTTATGACAATCTTGGAATTATTTTTATTTAATGTTAAATATTTTCTGGCATTTTTACTTTAATT  
ATTTTTAGCTATTCACCCACAAGTGCAGTAAGGCTGACATAATTACCTCCTTTAATTCACAAAAG  
ACATGTATTTACCTATTTGTTATAATGCTTCCTATGCTAGCATGCTGTTACTATGACAAGACTAC  
TCTGA

>hg19\_ct\_UserTrack\_3545\_313 range=chr3:163065707-163487306 5'pad=0  
3'pad=0 strand=+ repeatMasking=none\_1595  
TCTTAGGTTTAAGTCCATCTTCATTTGATTTTTGTATAAGATGAGAAAAGAGGATCCAGTTTCAT  
TCTACTACATGTGGCTAGCCAATTATCCCAGCACCATTTGTTGAAAAGGGTGTCCCTTTCTCCACT  
TTATGTTTTTGTGTTGCTTTGTCAAAGATCAGCTGGCTGTAAGTATTTGGGTTTACTTCTGGATGC  
TCTAT

>hg19\_ct\_UserTrack\_3545\_1044 range=chr10:89053199-89053398 5'pad=0  
3'pad=0 strand=+ repeatMasking=none\_0

TAGATTTGCCCTTGAAGTATCCTCCAGTGCAAATACTTTAATTGCTAACGTAAAAGTTTCATAA  
AAGCACATAAATCTCATTTATTATAGTTCTAATATGAAAATCTGGATCTCTTTAGAACCAGCTTT  
ATTAGGATCTCTTGGCTGCATATGTCAGAATCTCAACTCAAACCTCTTTATGAAAAAATTCAGC  
AGATG

>hg19\_ct\_UserTrack\_3545\_354 range=chr18:29267803-29290802 5'pad=0  
3'pad=0 strand=+ repeatMasking=none\_94

GAAAAGAAAAAAGAACATCATGTAACCTCTAAAGACTCTCTTCATTTCCATAATTTTATGGTT  
AATGTTTTATAGCAAATGTAACATTAATAACCAGTAACAATGTATTCCAGCCTGATTTTTGTTT  
AAGATCCCCAGCTGAAAGAGCTTAAATAGACTAAATCAGAAACAGCAATAGCAGTGTCAATAAGA  
TAATT

>hg19\_ct\_UserTrack\_3545\_456 range=chrX:126012720-126480719 5'pad=0  
3'pad=0 strand=+ repeatMasking=none\_1006

TAGAATGTATTTATGAACTTCTGGAAGACAAATATTTCTTAAACAAGGCAGAAAAATAACCATA  
AAAGAATATAATATATATTTAATTACATGAAGAATGTAAATCAATATAAAGATACCAATAAGAAA  
ATTAAATAACAACCTCACAGAGTGAAAAAGATATGCATACCTCTGAGCAAAAAAAAAAAAAAGTAC  
TCAGA

>hg19\_ct\_UserTrack\_3545\_104 range=chr16:62442500-62794899 5'pad=0  
3'pad=0 strand=+ repeatMasking=none\_229

ATATGCCATTTTAGCATAAGGATTATTTTGAGCTGAAGGCAATGTAGAAAAAAAAAAGACACAG  
AAGTACCCTCTACCCTTCCCTTATCTGCCTGAAAGCAGGGCATAAATTTTCTTTGTGAATGTGTT  
TCCCTCTTTGTATCAGAAAGGAAGAATTTTTATCGGTAGAGATGGGAACAGTACCGAGATGAG  
ACTGC
